# Supplementary material for: Multiomic characterization of pancreatic cancer-associated macrophage polarization reveals deregulated metabolic programs driven by the GM-CSF–PI3K pathway
Source: eLife. 2022 Feb 14;11:e73796. doi: 10.7554/eLife.73796 (PMC8843093; doi:10.7554/eLife.73796)
Supplement: Supplementary file 1. [file elife-73796-supp1.xlsx]

## Sheet: Transcriptomics
Subtype	Expr	Marker	ENTREZID	ANNOTATION
M0_MCSF	Up	Aplnr	23796	apelin receptor
M0_MCSF	Up	Gm12551	100040388	predicted gene 12551
M0_MCSF	Up	Nptx1	18164	neuronal pentraxin 1
M0_MCSF	Up	C1qtnf1	56745	C1q and tumor necrosis factor related protein 1
M0_MCSF	Up	Ptger3	19218	prostaglandin E receptor 3 (subtype EP3)
M0_MCSF	Up	Ighm	16019	immunoglobulin heavy constant mu
M0_MCSF	Up	Gulp1	70676	GULP, engulfment adaptor PTB domain containing 1
M0_MCSF	Up	Il10	16153	interleukin 10
M0_MCSF	Up	Gm12929	NA	NA
M0_MCSF	Up	Dll1	13388	delta like canonical Notch ligand 1
M0_MCSF	Up	Klrd1	16643	killer cell lectin-like receptor, subfamily D, member 1
M0_MCSF	Up	Apod	11815	apolipoprotein D
M0_MCSF	Up	Dmkn	73712	dermokine
M0_MCSF	Up	Cd4	12504	CD4 antigen
M0_MCSF	Up	RP23-466C10.2	NA	NA
M0_MCSF	Up	Fzd3	14365	frizzled class receptor 3
M0_MCSF	Up	Gm42848	NA	NA
M0_MCSF	Up	Myom1	17929	myomesin 1
M0_MCSF	Up	Mme	17380	membrane metallo endopeptidase
M0_MCSF	Up	Fxyd7	57780	FXYD domain-containing ion transport regulator 7
M0_MCSF	Up	Fxyd2	11936	FXYD domain-containing ion transport regulator 2
M0_MCSF	Up	Ifit3b	667370	interferon-induced protein with tetratricopeptide repeats 3B
M0_MCSF	Up	Gpr34	23890	G protein-coupled receptor 34
M0_MCSF	Up	Tgtp1	21822	T cell specific GTPase 1
M0_MCSF	Up	Gm10548	633395	ribosomal protein L29 pseudogene
M0_MCSF	Up	Cx3cr1	13051	chemokine (C-X3-C motif) receptor 1
M0_MCSF	Up	Tnfsf10	22035	tumor necrosis factor (ligand) superfamily, member 10
M0_MCSF	Up	Cd19	12478	CD19 antigen
M0_MCSF	Up	Bmp5	12160	bone morphogenetic protein 5
M0_MCSF	Up	Zfyve28	231125	zinc finger, FYVE domain containing 28
M0_MCSF	Up	Adam22	11496	a disintegrin and metallopeptidase domain 22
M0_MCSF	Up	Gpr82	319200	G protein-coupled receptor 82
M0_MCSF	Up	Hist1h3h	319152	histone cluster 1, H3h
M0_MCSF	Up	Tlr9	81897	toll-like receptor 9
M0_MCSF	Up	Gm9770	100043719	CTD (carboxy-terminal domain, RNA polymerase II, polypeptide A) small phosphatase 2 pseudogene
M0_MCSF	Up	Cacnb2	12296	calcium channel, voltage-dependent, beta 2 subunit
M0_MCSF	Up	Slc23a3	22626	solute carrier family 23 (nucleobase transporters), member 3
M0_MCSF	Up	Atp1b1	11931	ATPase, Na+/K+ transporting, beta 1 polypeptide
M0_MCSF	Up	Sema4f	20355	sema domain, immunoglobulin domain (Ig), TM domain, and short cytoplasmic domain
M0_MCSF	Up	Pcyt1b	236899	phosphate cytidylyltransferase 1, choline, beta isoform
M0_MCSF	Up	Tmie	20776	transmembrane inner ear
M0_MCSF	Up	Zbtb16	235320	zinc finger and BTB domain containing 16
M0_MCSF	Up	Nrg2	100042150	neuregulin 2
M0_MCSF	Up	Nek10	674895	NIMA (never in mitosis gene a)- related kinase 10
M0_MCSF	Up	Gm43868	NA	NA
M0_MCSF	Up	Gm45193	NA	NA
M0_MCSF	Up	D830025C05Rik	100042416	RIKEN cDNA D830025C05 gene
M0_MCSF	Up	Gm14230	100504361	predicted gene 14230
M0_MCSF	Up	Gm17364	NA	NA
M0_MCSF	Up	Gm11772	105246895	predicted gene 11772
M0_MCSF	Up	Gm5147	381258	ribosomal protein L7A pseudogene
M0_MCSF	Up	Gng4	14706	guanine nucleotide binding protein (G protein), gamma 4
M0_MCSF	Up	Gm15459	727711	heat shock protein 8 pseudogene
M0_MCSF	Up	Ifit1bl1	667373	interferon induced protein with tetratricpeptide repeats 1B like 1
M0_MCSF	Up	Gm15513	NA	NA
M0_MCSF	Up	Klrg2	74253	killer cell lectin-like receptor subfamily G, member 2
M0_MCSF	Up	Hpgd	15446	hydroxyprostaglandin dehydrogenase 15 (NAD)
M0_MCSF	Up	Sectm1a	209588	secreted and transmembrane 1A
M0_MCSF	Up	Eqtn	67753	equatorin, sperm acrosome associated
M0_MCSF	Up	Syt12	171180	synaptotagmin XII
M0_MCSF	Up	Gm44428	NA	NA
M0_MCSF	Up	Kcnj10	16513	potassium inwardly-rectifying channel, subfamily J, member 10
M0_MCSF	Up	Cdc34b	111266	cell division cycle 34B
M0_MCSF	Up	Ccdc18	73254	coiled-coil domain containing 18
M0_MCSF	Up	Kcnk12	210741	potassium channel, subfamily K, member 12
M0_MCSF	Up	Gm10180	NA	NA
M0_MCSF	Up	Gm3699	100329138	ribosomal protein L41 pseudogene
M0_MCSF	Up	Gm10736	100504654	predicted gene 10736
M0_MCSF	Up	Rsad2	58185	radical S-adenosyl methionine domain containing 2
M0_MCSF	Up	Gm21742	NA	NA
M0_MCSF	Up	BC034090	207792	cDNA sequence BC034090
M0_MCSF	Up	Gm568	230143	predicted gene 568
M0_MCSF	Up	Atoh8	71093	atonal bHLH transcription factor 8
M0_MCSF	Up	Gm11914	100040691	high-mobility group nucleosome binding domain 5 pseudogene
M0_MCSF	Up	Gm44805	105886299	predicted gene 44805
M0_MCSF	Up	Katnal2	71206	katanin p60 subunit A-like 2
M0_MCSF	Up	Iigp1	60440	interferon inducible GTPase 1
M0_MCSF	Up	Gm37010	NA	NA
M0_MCSF	Up	Ifit3	15959	interferon-induced protein with tetratricopeptide repeats 3
M0_MCSF	Up	Gm37474	NA	NA
M0_MCSF	Up	Klhdc9	68874	kelch domain containing 9
M0_MCSF	Up	Gm11346	76024	X-linked lymphocyte-regulated 5 pseudogene
M0_MCSF	Up	Sult1a1	20887	sulfotransferase family 1A, phenol-preferring, member 1
M0_MCSF	Up	Gm18588	100417394	oxysterol binding protein-like 9 pseudogene
M0_MCSF	Up	Palm2	242481	paralemmin 2
M0_MCSF	Up	Gm5898	545971	thyroid hormone receptor associated protein 3 pseudogene
M0_MCSF	Up	Nr4a1	15370	nuclear receptor subfamily 4, group A, member 1
M0_MCSF	Up	Dgki	320127	diacylglycerol kinase, iota
M0_MCSF	Up	Mir6403	102465216	microRNA 6403
M0_MCSF	Up	Gm16028	NA	NA
M0_MCSF	Up	Gm10282	100042405	high mobility group nucleosomal binding domain 2 pseudogene
M0_MCSF	Up	Gm11810	100039478	predicted gene 11810
M0_MCSF	Up	Knstrn	51944	kinetochore-localized astrin/SPAG5 binding
M0_MCSF	Up	Itga9	104099	integrin alpha 9
M0_MCSF	Up	Slc35g3	56293	solute carrier family 35, member G3
M0_MCSF	Up	RP23-369P21.2	NA	NA
M0_MCSF	Up	Gm12764	NA	NA
M0_MCSF	Up	Gm13710	672763	predicted gene 13710
M0_MCSF	Up	Slc10a6	75750	solute carrier family 10 (sodium/bile acid cotransporter family), member 6
M0_MCSF	Up	Pcdh18	73173	protocadherin 18
M0_MCSF	Up	Ace	11421	angiotensin I converting enzyme (peptidyl-dipeptidase A) 1
M0_MCSF	Up	Gm42632	NA	NA
M0_MCSF	Up	Angptl4	57875	angiopoietin-like 4
M0_MCSF	Up	Ube2c	68612	ubiquitin-conjugating enzyme E2C
M0_MCSF	Up	Mir3960	100628606	microRNA 3960
M0_MCSF	Up	Skint3	195564	selection and upkeep of intraepithelial T cells 3
M0_MCSF	Up	Gm44258	NA	NA
M0_MCSF	Up	Nwd1	319555	NACHT and WD repeat domain containing 1
M0_MCSF	Up	Slc6a17	229706	solute carrier family 6 (neurotransmitter transporter), member 17
M0_MCSF	Up	Gm36638|1	NA	NA
M0_MCSF	Up	Gm38037	NA	NA
M0_MCSF	Up	Gm21981	NA	NA
M0_MCSF	Up	Gm20479	NA	NA
M0_MCSF	Up	Ms4a14	383435	membrane-spanning 4-domains, subfamily A, member 14
M0_MCSF	Up	4930526L06Rik	75138	RIKEN cDNA 4930526L06 gene
M0_MCSF	Up	Gm29291	NA	NA
M0_MCSF	Up	Abcc2	12780	ATP-binding cassette, sub-family C (CFTR/MRP), member 2
M0_MCSF	Up	Klrk1	27007	killer cell lectin-like receptor subfamily K, member 1
M0_MCSF	Up	Zfa-ps	22639	zinc finger protein, autosomal, pseudogene
M0_MCSF	Up	Mterf2	74238	mitochondrial transcription termination factor 2
M0_MCSF	Up	B430319H21Rik	77849	RIKEN cDNA B430319H21 gene
M0_MCSF	Up	Lrrc46	69297	leucine rich repeat containing 46
M0_MCSF	Up	Gm9311	668709	UDP-glucuronate decarboxylase 1 pseudogene
M0_MCSF	Up	Gm37411	NA	NA
M0_MCSF	Up	Cngb1	333329	cyclic nucleotide gated channel beta 1
M0_MCSF	Up	Slco2b1	101488	solute carrier organic anion transporter family, member 2b1
M0_MCSF	Up	Gm28177	NA	NA
M0_MCSF	Up	Ifit2	15958	interferon-induced protein with tetratricopeptide repeats 2
M0_MCSF	Up	Lhx2	16870	LIM homeobox protein 2
M0_MCSF	Up	Ttc36	192653	tetratricopeptide repeat domain 36
M0_MCSF	Up	Ckap2	80986	cytoskeleton associated protein 2
M0_MCSF	Up	Troap	78733	trophinin associated protein
M0_MCSF	Up	Fosb	14282	FBJ osteosarcoma oncogene B
M0_MCSF	Up	2610206C17Rik	72495	RIKEN cDNA 2610206C17 gene
M0_MCSF	Up	Adam19	11492	a disintegrin and metallopeptidase domain 19 (meltrin beta)
M0_MCSF	Up	4930556J24Rik	75342	RIKEN cDNA 4930556J24 gene
M0_MCSF	Up	Gm12735	NA	NA
M0_MCSF	Up	G730013B05Rik	619312	RIKEN cDNA G730013B05 gene
M0_MCSF	Up	Phf20-ps	100416335	PHD finger protein 20, pseudogene
M0_MCSF	Up	4933423P22Rik	71158	RIKEN cDNA 4933423P22 gene
M0_MCSF	Up	Cmpk2	22169	cytidine monophosphate (UMP-CMP) kinase 2, mitochondrial
M0_MCSF	Up	Gm20404	108169163	predicted gene 20404
M0_MCSF	Up	Fam26f	NA	NA
M0_MCSF	Up	Gm45047	NA	NA
M0_MCSF	Up	Slfn9	237886	schlafen 9
M0_MCSF	Up	Axin2	12006	axin 2
M0_MCSF	Up	Tpbgl	100503386	trophoblast glycoprotein-like
M0_MCSF	Up	Pltp	18830	phospholipid transfer protein
M0_MCSF	Up	Dixdc1	330938	DIX domain containing 1
M0_MCSF	Up	Greb1l	381157	growth regulation by estrogen in breast cancer-like
M0_MCSF	Up	Tmem204	407831	transmembrane protein 204
M0_MCSF	Up	Tbx6	21389	T-box 6
M0_MCSF	Up	Kif18b	70218	kinesin family member 18B
M0_MCSF	Up	Fcrls	80891	Fc receptor-like S, scavenger receptor
M0_MCSF	Up	Adgre4	52614	adhesion G protein-coupled receptor E4
M0_MCSF	Up	Jag2	16450	jagged 2
M0_MCSF	Up	2610528A11Rik	70045	RIKEN cDNA 2610528A11 gene
M0_MCSF	Up	Gm10074	100046579	u6 snRNA-associated Sm-like protein LSm5-like
M0_MCSF	Up	Gm26797	108167690	predicted gene, 26797
M0_MCSF	Up	Slc5a11	233836	solute carrier family 5 (sodium/glucose cotransporter), member 11
M0_MCSF	Up	Srpk3	56504	serine/arginine-rich protein specific kinase 3
M0_MCSF	Up	Atp2b4	381290	ATPase, Ca++ transporting, plasma membrane 4
M0_MCSF	Up	Gm13184	NA	NA
M0_MCSF	Up	Tmem63c	217733	transmembrane protein 63c
M0_MCSF	Up	Ak9	633979	adenylate kinase 9
M0_MCSF	Up	Gm15154	NA	NA
M0_MCSF	Up	B830042I05Rik	78692	RIKEN cDNA B830042I05 gene
M0_MCSF	Up	Rtkn2	170799	rhotekin 2
M0_MCSF	Up	Hepacam2	101202	HEPACAM family member 2
M0_MCSF	Up	Aspm	12316	abnormal spindle microtubule assembly
M0_MCSF	Up	Gm8463	667112	ribosomal protein S8 pseudogene
M0_MCSF	Up	Kif23	71819	kinesin family member 23
M0_MCSF	Up	Hap1	15114	huntingtin-associated protein 1
M0_MCSF	Up	Gm17324	100579154	predicted gene, 17324
M0_MCSF	Up	Gm37139	NA	NA
M0_MCSF	Up	Abcb1b	18669	ATP-binding cassette, sub-family B (MDR/TAP), member 1B
M0_MCSF	Up	Prr11	270906	proline rich 11
M0_MCSF	Up	Gm27201	NA	NA
M0_MCSF	Up	Chrna9	231252	cholinergic receptor, nicotinic, alpha polypeptide 9
M0_MCSF	Up	Elovl4	83603	elongation of very long chain fatty acids (FEN1/Elo2, SUR4/Elo3, yeast)-like 4
M0_MCSF	Up	Gm13162	100041570	predicted pseudogene 13162
M0_MCSF	Up	B930082K07Rik	320947	RIKEN cDNA B930082K07 gene
M0_MCSF	Up	Abcb1a	18671	ATP-binding cassette, sub-family B (MDR/TAP), member 1A
M0_MCSF	Up	Apcdd1	494504	adenomatosis polyposis coli down-regulated 1
M0_MCSF	Up	Npb	208990	neuropeptide B
M0_MCSF	Up	Gm20612	NA	NA
M0_MCSF	Up	Gm29808	101056241	predicted gene, 29808
M0_MCSF	Up	Gm11223	100039888	stathmin 1 pseudogene
M0_MCSF	Up	Pde3b	18576	phosphodiesterase 3B, cGMP-inhibited
M0_MCSF	Up	Gm13091	NA	NA
M0_MCSF	Up	Gm43403	108168904	predicted gene 43403
M0_MCSF	Up	Gm14091	NA	NA
M0_MCSF	Up	Gm10254	545524	splicing factor, arginine/serine-rich 10 pseudogene
M0_MCSF	Up	Efcc1	58229	EF hand and coiled-coil domain containing 1
M0_MCSF	Up	Gm26670	105244064	predicted gene, 26670
M0_MCSF	Up	Epha4	13838	Eph receptor A4
M0_MCSF	Up	Gucy1a3	NA	NA
M0_MCSF	Up	G430095P16Rik	619292	RIKEN cDNA G430095P16 gene
M0_MCSF	Up	Gm11948	NA	NA
M0_MCSF	Up	Nxpe4	244853	neurexophilin and PC-esterase domain family, member 4
M0_MCSF	Up	Il18rap	16174	interleukin 18 receptor accessory protein
M0_MCSF	Up	Gm14251	632394	predicted gene 14251
M0_MCSF	Up	Gpr162	14788	G protein-coupled receptor 162
M0_MCSF	Up	RP24-545I11.1	NA	NA
M0_MCSF	Up	Ppp1r2-ps4	623488	protein phosphatase 1, regulatory (inhibitor) subunit 2, pseudogene 4
M0_MCSF	Up	Cd207	246278	CD207 antigen
M0_MCSF	Up	Dhx58os	102636186	DEAH (Asp-Glu-Ala-His) box polypeptide 58, opposite strand
M0_MCSF	Up	1700030C10Rik|1	NA	NA
M0_MCSF	Up	Cxcr4	12767	chemokine (C-X-C motif) receptor 4
M0_MCSF	Up	Gm6750	627375	predicted gene 6750
M0_MCSF	Up	Thap8	75629	THAP domain containing 8
M0_MCSF	Up	Gm15489	NA	NA
M0_MCSF	Up	Serpinf2	18816	serine (or cysteine) peptidase inhibitor, clade F, member 2
M0_MCSF	Up	Nfkbiz	80859	nuclear factor of kappa light polypeptide gene enhancer in B cells inhibitor, zeta
M0_MCSF	Up	Lockd	381822	lncRNA downstream of Cdkn1b
M0_MCSF	Up	Gm28635	NA	NA
M0_MCSF	Up	Adam3	11497	a disintegrin and metallopeptidase domain 3 (cyritestin)
M0_MCSF	Up	Gm37303	NA	NA
M0_MCSF	Up	P4ha3	320452	procollagen-proline, 2-oxoglutarate 4-dioxygenase (proline 4-hydroxylase), alpha polypeptide III
M0_MCSF	Up	Smpd3	58994	sphingomyelin phosphodiesterase 3, neutral
M0_MCSF	Up	Abca6	76184	ATP-binding cassette, sub-family A (ABC1), member 6
M0_MCSF	Up	Smim10l2a	320237	small integral membrane protein 10 like 2A
M0_MCSF	Up	Atp1b2	11932	ATPase, Na+/K+ transporting, beta 2 polypeptide
M0_MCSF	Up	Fam26e	NA	NA
M0_MCSF	Up	Kif20a	19348	kinesin family member 20A
M0_MCSF	Up	Letm2	270035	leucine zipper-EF-hand containing transmembrane protein 2
M0_MCSF	Up	Rundc3b	242819	RUN domain containing 3B
M0_MCSF	Up	Ccnb2	12442	cyclin B2
M0_MCSF	Up	Gm9869	791387	predicted gene 9869
M0_MCSF	Up	Gm27021	105734727	predicted gene, 27021
M0_MCSF	Up	Cd300ld4	100043123	CD300 molecule like family member D4
M0_MCSF	Up	Tgtp2	100039796	T cell specific GTPase 2
M0_MCSF	Up	Kcnj9	16524	potassium inwardly-rectifying channel, subfamily J, member 9
M0_MCSF	Up	1500002F19Rik	76683	RIKEN cDNA 1500002F19 gene
M0_MCSF	Up	Gm14373	627412	La ribonucleoprotein domain family, member 4 pseudogene
M0_MCSF	Up	Ctla2a	13024	cytotoxic T lymphocyte-associated protein 2 alpha
M0_MCSF	Up	Sox15	20670	SRY (sex determining region Y)-box 15
M0_MCSF	Up	Rpl35a-ps5	100040169	ribosomal protein L35A, pseudogene 5
M0_MCSF	Up	Ndnf	68169	neuron-derived neurotrophic factor
M0_MCSF	Up	Cenpe	229841	centromere protein E
M0_MCSF	Up	Gm6625	625801	predicted gene 6625
M0_MCSF	Up	Grin2c	14813	glutamate receptor, ionotropic, NMDA2C (epsilon 3)
M0_MCSF	Up	Capn9	73647	calpain 9
M0_MCSF	Up	Gm9978	791283	predicted gene 9978
M0_MCSF	Up	Gm43068	NA	NA
M0_MCSF	Up	Rpl21-ps3	432665	ribosomal protein L21, pseudogene 3
M0_MCSF	Up	Gm15954	NA	NA
M0_MCSF	Up	Cyp27a1	104086	cytochrome P450, family 27, subfamily a, polypeptide 1
M0_MCSF	Up	C730034F03Rik	105246016	RIKEN cDNA C730034F03 gene
M0_MCSF	Up	Psrc1	56742	proline/serine-rich coiled-coil 1
M0_MCSF	Up	Plk1	18817	polo like kinase 1
M0_MCSF	Up	Cbfa2t2-ps1	12397	CBFA2/RUNX1 translocation partner 2, pseudogene 1
M0_MCSF	Up	Gm996	NA	NA
M0_MCSF	Up	Grap2	17444	GRB2-related adaptor protein 2
M0_MCSF	Up	Trp53i11	277414	transformation related protein 53 inducible protein 11
M0_MCSF	Up	Pls1	102502	plastin 1 (I-isoform)
M0_MCSF	Up	Parpbp	75317	PARP1 binding protein
M0_MCSF	Up	9330160F10Rik	791118	RIKEN cDNA 9330160F10 gene
M0_MCSF	Up	Gm5857	545572	predicted gene 5857
M0_MCSF	Up	Tm4sf5	75604	transmembrane 4 superfamily member 5
M0_MCSF	Up	Il12rb2	16162	interleukin 12 receptor, beta 2
M0_MCSF	Up	Btnl9	237754	butyrophilin-like 9
M0_MCSF	Up	Tcf4	21413	transcription factor 4
M0_MCSF	Up	Ccdc85c	668158	coiled-coil domain containing 85C
M0_MCSF	Up	Mok	26448	MOK protein kinase
M0_MCSF	Up	Acot1	26897	acyl-CoA thioesterase 1
M0_MCSF	Up	Gm45055	NA	NA
M0_MCSF	Up	Cdc20	107995	cell division cycle 20
M0_MCSF	Up	4933433G15Rik	71274	RIKEN cDNA 4933433G15 gene
M0_MCSF	Up	Gm44136	NA	NA
M0_MCSF	Up	Rnf144a	108089	ring finger protein 144A
M0_MCSF	Up	Clstn3	232370	calsyntenin 3
M0_MCSF	Up	Gm44313	NA	NA
M0_MCSF	Up	Nusap1	108907	nucleolar and spindle associated protein 1
M0_MCSF	Up	Cdkn3	72391	cyclin-dependent kinase inhibitor 3
M0_MCSF	Up	Kmo	98256	kynurenine 3-monooxygenase (kynurenine 3-hydroxylase)
M0_MCSF	Up	Gm43339	NA	NA
M0_MCSF	Up	F2rl1	14063	coagulation factor II (thrombin) receptor-like 1
M0_MCSF	Up	Dmtn	13829	dematin actin binding protein
M0_MCSF	Up	Evc	59056	EvC ciliary complex subunit 1
M0_MCSF	Up	Styxl1	76571	serine/threonine/tyrosine interacting-like 1
M0_MCSF	Up	Efna4	13639	ephrin A4
M0_MCSF	Up	Rhod	11854	ras homolog family member D
M0_MCSF	Up	Bnc2	242509	basonuclin 2
M0_MCSF	Up	Fam64a	NA	NA
M0_MCSF	Up	2510016D11Rik	70289	RIKEN cDNA 2510016D11 gene
M0_MCSF	Up	7330423F06Rik	78146	RIKEN cDNA 7330423F06 gene
M0_MCSF	Up	Gm20689	NA	NA
M0_MCSF	Up	Neurl1b	240055	neuralized E3 ubiquitin protein ligase 1B
M0_MCSF	Up	Kif14	381293	kinesin family member 14
M0_MCSF	Up	Gm6139	108169072	40S ribosomal protein S2 pseudogene
M0_MCSF	Up	RP23-430L2.2	NA	NA
M0_MCSF	Up	Gm11361	100042388	ribosomal protein S18 pseudogene
M0_MCSF	Up	Bahcc1	268515	BAH domain and coiled-coil containing 1
M0_MCSF	Up	Gm20548	108169124	predicted gene 20548
M0_MCSF	Up	Gm26756	102636275	predicted gene, 26756
M0_MCSF	Up	Sulf2	72043	sulfatase 2
M0_MCSF	Up	Epb41l4b	54357	erythrocyte membrane protein band 4.1 like 4b
M0_MCSF	Up	Gm36638|2	NA	NA
M0_MCSF	Up	A330017A19Rik	442840	RIKEN cDNA A330017A19 gene
M0_MCSF	Up	Samd4	74480	sterile alpha motif domain containing 4
M0_MCSF	Up	Gcnt4	218476	glucosaminyl (N-acetyl) transferase 4, core 2 (beta-1,6-N-acetylglucosaminyltransferase)
M0_MCSF	Up	Gm11127	100529082	predicted gene 11127
M0_MCSF	Up	Fhit	14198	fragile histidine triad gene
M0_MCSF	Up	E130102H24Rik	77866	RIKEN cDNA E130102H24 gene
M0_MCSF	Up	Hist1h4k	319160	histone cluster 1, H4k
M0_MCSF	Up	Sarm1	237868	sterile alpha and HEAT/Armadillo motif containing 1
M0_MCSF	Up	0610039K10Rik	68386	RIKEN cDNA 0610039K10 gene
M0_MCSF	Up	Gm26798	NA	NA
M0_MCSF	Up	Tbx2	21385	T-box 2
M0_MCSF	Up	C030017G13Rik	319334	RIKEN cDNA C030017G13 gene
M0_MCSF	Up	Gm10069	791299	predicted gene 10069
M0_MCSF	Up	9630013D21Rik	319743	RIKEN cDNA 9630013D21 gene
M0_MCSF	Up	Gm15539	100416290	predicted gene 15539
M0_MCSF	Up	Gm3940	100042634	ribosomal protein L23A pseudogene
M0_MCSF	Up	Nectin4	71740	nectin cell adhesion molecule 4
M0_MCSF	Up	Ms4a4b	60361	membrane-spanning 4-domains, subfamily A, member 4B
M0_MCSF	Up	Gm37493	NA	NA
M0_MCSF	Up	Gbp2b	14468	guanylate binding protein 2b
M0_MCSF	Up	Lrrc73	224813	leucine rich repeat containing 73
M0_MCSF	Up	Cxcl10	15945	chemokine (C-X-C motif) ligand 10
M0_MCSF	Up	Gm11748	NA	NA
M0_MCSF	Up	4921507G05Rik	66709	RIKEN cDNA 4921507G05 gene
M0_MCSF	Up	Gm8337	666869	heat shock protein 8 pseudogene
M0_MCSF	Up	Ms4a7	109225	membrane-spanning 4-domains, subfamily A, member 7
M0_MCSF	Up	Gm6034	547347	predicted gene 6034
M0_MCSF	Up	Bmf	171543	BCL2 modifying factor
M0_MCSF	Up	Gm8606	667394	ribosomal protein L6 pseudogene
M0_MCSF	Up	RP23-42I13.3	NA	NA
M0_MCSF	Up	Kif2c	73804	kinesin family member 2C
M0_MCSF	Up	2900052L18Rik	102640779	RIKEN cDNA 2900052L18 gene
M0_MCSF	Up	Gm15452	100039474	CDC28 protein kinase regulatory subunit 2 pseudogene
M0_MCSF	Up	Amy1	11722	amylase 1, salivary
M0_MCSF	Up	Tldc2	383766	TBC/LysM associated domain containing 2
M0_MCSF	Up	Sdk1	330222	sidekick cell adhesion molecule 1
M0_MCSF	Up	Rdh16	19683	retinol dehydrogenase 16
M0_MCSF	Up	Gm15478	100042458	predicted gene 15478
M0_MCSF	Up	Gm9722	677785	predicted gene 9722
M0_MCSF	Up	Gm20324	100504637	predicted gene, 20324
M0_MCSF	Up	Gm15530	100417700	anaphase promoting complex subunit 10 pseudogene
M0_MCSF	Up	Gm13669	623453	predicted gene 13669
M0_MCSF	Up	Xkr5	319581	X-linked Kx blood group related 5
M0_MCSF	Up	Gm10638	666945	predicted gene 10638
M0_MCSF	Up	Gm26737	NA	NA
M0_MCSF	Up	Gm42956	NA	NA
M0_MCSF	Up	Ccdc63	330188	coiled-coil domain containing 63
M0_MCSF	Up	1700041G16Rik	73299	RIKEN cDNA 1700041G16 gene
M0_MCSF	Up	Gm16213	NA	NA
M0_MCSF	Up	Nectin1	58235	nectin cell adhesion molecule 1
M0_MCSF	Up	Elovl2	54326	elongation of very long chain fatty acids (FEN1/Elo2, SUR4/Elo3, yeast)-like 2
M0_MCSF	Up	Frat2	212398	frequently rearranged in advanced T cell lymphomas 2
M0_MCSF	Up	Gm4992	245575	tripartite motif-containing 5 pseudogene
M0_MCSF	Up	Eps8l1	67425	EPS8-like 1
M0_MCSF	Up	Enho	69638	energy homeostasis associated
M0_MCSF	Up	Cenpf	108000	centromere protein F
M0_MCSF	Up	RP23-359B23.11	NA	NA
M0_MCSF	Up	Ckap2l	70466	cytoskeleton associated protein 2-like
M0_MCSF	Up	Col15a1	12819	collagen, type XV, alpha 1
M0_MCSF	Up	Lca5l	385668	Leber congenital amaurosis 5-like
M0_MCSF	Up	Gm12580	433711	predicted gene 12580
M0_MCSF	Up	Rnd3	74194	Rho family GTPase 3
M0_MCSF	Up	2010109A12Rik	75610	RIKEN cDNA 2010109A12 gene
M0_MCSF	Up	Matn1	17180	matrilin 1, cartilage matrix protein
M0_MCSF	Up	Gm23301	NA	NA
M0_MCSF	Up	Ctxn1	330695	cortexin 1
M0_MCSF	Up	Zfp960	449000	zinc finger protein 960
M0_MCSF	Up	Dpp4	13482	dipeptidylpeptidase 4
M0_MCSF	Up	Gm5970	546714	interferon inducible GTPase 1 pseudogene
M0_MCSF	Up	Aim1l	NA	NA
M0_MCSF	Up	Gm13296	667211	glyceraldehyde-3-phosphate dehydrogenase pseudogene
M0_MCSF	Up	Gm20563	NA	NA
M0_MCSF	Up	Mx2	17858	MX dynamin-like GTPase 2
M0_MCSF	Up	Gm10335	100039571	ribosomal protein L23A pseudogene
M0_MCSF	Up	Ift81	12589	intraflagellar transport 81
M0_MCSF	Up	Saxo2	330577	stabilizer of axonemal microtubules 2
M0_MCSF	Up	Gm14292	100043168	Wilms' tumour 1-associating protein pseudogene
M0_MCSF	Up	Tmem176b	65963	transmembrane protein 176B
M0_MCSF	Up	Kifc1	100502766	kinesin family member C1
M0_MCSF	Up	Gm9144	668388	nuclear transcription factor-Y gamma pseudogene
M0_MCSF	Up	Nup210l	77595	nucleoporin 210-like
M0_MCSF	Up	Gm37416	105244086	predicted gene, 37416
M0_MCSF	Up	RP24-502E20.6	NA	NA
M0_MCSF	Up	Sorbs2	234214	sorbin and SH3 domain containing 2
M0_MCSF	Up	Dbp	13170	D site albumin promoter binding protein
M0_MCSF	Up	Nrn1l	234700	neuritin 1-like
M0_MCSF	Up	2310047D07Rik	69657	RIKEN cDNA 2310047D07 gene
M0_MCSF	Up	Gm20470	105245103	predicted gene 20470
M0_MCSF	Up	Gm5611	434373	nucleophosmin 1 pseudogene
M0_MCSF	Up	Fam83d	71878	family with sequence similarity 83, member D
M0_MCSF	Up	Sh3d21	66938	SH3 domain containing 21
M0_MCSF	Up	Kcnk5	16529	potassium channel, subfamily K, member 5
M0_MCSF	Up	Gm43138	NA	NA
M0_MCSF	Up	Prdm1	12142	PR domain containing 1, with ZNF domain
M0_MCSF	Up	Cep55	74107	centrosomal protein 55
M0_MCSF	Up	Gpr4	319197	G protein-coupled receptor 4
M0_MCSF	Up	B430203G13Rik	791400	RIKEN cDNA B430203G13 gene
M0_MCSF	Up	Gm26686	NA	NA
M0_MCSF	Up	G6b	NA	NA
M0_MCSF	Up	Cdhr4	69398	cadherin-related family member 4
M0_MCSF	Up	Tpcn1	252972	two pore channel 1
M0_MCSF	Up	Slc15a4	100561	solute carrier family 15, member 4
M0_MCSF	Up	Htra3	78558	HtrA serine peptidase 3
M0_MCSF	Up	Gm13391	102632465	predicted gene 13391
M0_MCSF	Up	Tex15	104271	testis expressed gene 15
M0_MCSF	Up	Gm38386	NA	NA
M0_MCSF	Up	Cd28	12487	CD28 antigen
M0_MCSF	Up	Plekhg5	269608	pleckstrin homology domain containing, family G (with RhoGef domain) member 5
M0_MCSF	Up	AW011738	100382	expressed sequence AW011738
M0_MCSF	Up	Gm15747	NA	NA
M0_MCSF	Up	Gm38140	NA	NA
M0_MCSF	Up	Caskin1	268932	CASK interacting protein 1
M0_MCSF	Up	Gm28046	NA	NA
M0_MCSF	Up	Nrbp2	223649	nuclear receptor binding protein 2
M0_MCSF	Up	Col18a1	12822	collagen, type XVIII, alpha 1
M0_MCSF	Up	Kif5c	16574	kinesin family member 5C
M0_MCSF	Up	Vipr1	22354	vasoactive intestinal peptide receptor 1
M0_MCSF	Up	Kcnk7	16530	potassium channel, subfamily K, member 7
M0_MCSF	Up	Gm2822	100040524	predicted gene 2822
M0_MCSF	Up	Gm42648	NA	NA
M0_MCSF	Up	Phf24	230085	PHD finger protein 24
M0_MCSF	Up	Gm17281	100503319	predicted gene, 17281
M0_MCSF	Up	Gm29440	NA	NA
M0_MCSF	Up	Gm28731	NA	NA
M0_MCSF	Up	Irgm2	54396	immunity-related GTPase family M member 2
M0_MCSF	Up	Nfatc2	18019	nuclear factor of activated T cells, cytoplasmic, calcineurin dependent 2
M0_MCSF	Up	Adra1a	11549	adrenergic receptor, alpha 1a
M0_MCSF	Up	Gm44521	NA	NA
M0_MCSF	Up	Gm13154	NA	NA
M0_MCSF	Up	Gm37204	NA	NA
M0_MCSF	Up	Tcte3	21647	t-complex-associated testis expressed 3
M0_MCSF	Up	Slc25a27	74011	solute carrier family 25, member 27
M0_MCSF	Up	Gm44573	NA	NA
M0_MCSF	Up	Cd2	12481	CD2 antigen
M0_MCSF	Up	Npnt	114249	nephronectin
M0_MCSF	Up	Tdg-ps	545124	thymine DNA glycosylase, pseudogene
M0_MCSF	Up	Pou2f2	18987	POU domain, class 2, transcription factor 2
M0_MCSF	Up	Gm2058	100039133	ubiquitin-conjugating enzyme E2H pseudogene
M0_MCSF	Up	Gm13237	666390	predicted gene 13237
M0_MCSF	Up	Rnf144b	218215	ring finger protein 144B
M0_MCSF	Up	Fzd2	57265	frizzled class receptor 2
M0_MCSF	Up	Gm13717	102633026	predicted gene 13717
M0_MCSF	Up	Gm12630	100384871	ribosomal protein L7A pseudogene
M0_MCSF	Up	Gm22442	NA	NA
M0_MCSF	Up	Arhgef39	230098	Rho guanine nucleotide exchange factor (GEF) 39
M0_MCSF	Up	Gm16340	NA	NA
M0_MCSF	Up	Slain1	105439	SLAIN motif family, member 1
M0_MCSF	Up	Cfap53	74453	cilia and flagella associated protein 53
M0_MCSF	Up	4930509G22Rik	105246071	RIKEN cDNA 4930509G22 gene
M0_MCSF	Up	Fcrla	98752	Fc receptor-like A
M0_MCSF	Up	Gm44143	NA	NA
M0_MCSF	Up	9430065F17Rik	77857	RIKEN cDNA 9430065F17 gene
M0_MCSF	Up	Arhgef26	622434	Rho guanine nucleotide exchange factor (GEF) 26
M0_MCSF	Up	Serpina3f	238393	serine (or cysteine) peptidase inhibitor, clade A, member 3F
M0_MCSF	Up	Oplah	75475	5-oxoprolinase (ATP-hydrolysing)
M0_MCSF	Up	Sh2d2a	27371	SH2 domain containing 2A
M0_MCSF	Up	Gm37475	NA	NA
M0_MCSF	Up	Nek2	18005	NIMA (never in mitosis gene a)-related expressed kinase 2
M0_MCSF	Up	Gm9392	668838	Rap1A-retro1
M0_MCSF	Up	Gm13414	623269	DnaJ (Hsp40) homolog, subfamily B, member 6 pseudogene
M0_MCSF	Up	Tssk1	22114	testis-specific serine kinase 1
M0_MCSF	Up	Gm12522	100038453	predicted gene 12522
M0_MCSF	Up	Gm15157	NA	NA
M0_MCSF	Up	Gm15635	NA	NA
M0_MCSF	Up	Gm6382	623006	retinoblastoma binding protein 7 pseudogene
M0_MCSF	Up	Cep112	76380	centrosomal protein 112
M0_MCSF	Up	Spn	20737	sialophorin
M0_MCSF	Up	Gm42814	NA	NA
M0_MCSF	Up	Gm43305	108168162	predicted gene 43305
M0_MCSF	Up	Gm26896	NA	NA
M0_MCSF	Up	Ggt5	23887	gamma-glutamyltransferase 5
M0_MCSF	Up	Trp53cor1	100504267	tumor protein p53 pathway corepressor 1
M0_MCSF	Up	Gm15708	100504231	predicted gene 15708
M0_MCSF	Up	Rhbdf1	13650	rhomboid 5 homolog 1
M0_MCSF	Up	Gm16316	100504604	predicted gene 16316
M0_MCSF	Up	Gm43311	NA	NA
M0_MCSF	Up	Gm17538	NA	NA
M0_MCSF	Up	Slfn5	327978	schlafen 5
M0_MCSF	Up	Krt7	110310	keratin 7
M0_MCSF	Up	Gm15707	546917	lactate dehydrogenase A pseudogene
M0_MCSF	Up	Hist1h3d	319149	histone cluster 1, H3d
M0_MCSF	Up	Serinc3	26943	serine incorporator 3
M0_MCSF	Up	E230001N04Rik	320187	RIKEN cDNA E230001N04 gene
M0_MCSF	Up	Rnf125	67664	ring finger protein 125
M0_MCSF	Up	Nr1d1	217166	nuclear receptor subfamily 1, group D, member 1
M0_MCSF	Up	Camsap3	69697	calmodulin regulated spectrin-associated protein family, member 3
M0_MCSF	Up	Gm44085	NA	NA
M0_MCSF	Up	Atp2a1	11937	ATPase, Ca++ transporting, cardiac muscle, fast twitch 1
M0_MCSF	Up	Mef2c	17260	myocyte enhancer factor 2C
M0_MCSF	Up	Mx1	17857	MX dynamin-like GTPase 1
M0_MCSF	Up	Hoxb7	15415	homeobox B7
M0_MCSF	Up	Fam222a	433940	family with sequence similarity 222, member A
M0_MCSF	Up	Hmmr	15366	hyaluronan mediated motility receptor (RHAMM)
M0_MCSF	Up	Rpl10	110954	ribosomal protein L10
M0_MCSF	Up	Gm14269	228916	predicted gene 14269
M0_MCSF	Up	Cd69	12515	CD69 antigen
M0_MCSF	Up	Gm26397	NA	NA
M0_MCSF	Up	Gm13369	100502743	predicted gene 13369
M0_MCSF	Up	A430072P03Rik	414110	RIKEN cDNA A430072P03 gene
M0_MCSF	Up	Gm37226	NA	NA
M0_MCSF	Up	Zfp652os	432396	zinc finger protein 652, opposite strand
M0_MCSF	Up	Apbb1	11785	amyloid beta (A4) precursor protein-binding, family B, member 1
M0_MCSF	Up	Rgs2	19735	regulator of G-protein signaling 2
M0_MCSF	Up	Tbc1d4	210789	TBC1 domain family, member 4
M0_MCSF	Up	Gm5976	546736	glyceraldehyde-3-phosphate dehydrogenase pseudogene
M0_MCSF	Up	Serpinf1	20317	serine (or cysteine) peptidase inhibitor, clade F, member 1
M0_MCSF	Up	Sorbs3	20410	sorbin and SH3 domain containing 3
M0_MCSF	Up	Gm37198	NA	NA
M0_MCSF	Up	Slc46a3	71706	solute carrier family 46, member 3
M0_MCSF	Up	Gm9821	100310873	predicted gene 9821
M0_MCSF	Up	Klhl38	268807	kelch-like 38
M0_MCSF	Up	Mmp15	17388	matrix metallopeptidase 15
M0_MCSF	Up	Igsf23	70080	immunoglobulin superfamily, member 23
M0_MCSF	Up	Shisa2	219134	shisa family member 2
M0_MCSF	Up	Clec4a4	474145	C-type lectin domain family 4, member a4
M0_MCSF	Up	Gm16477	677073	ribosomal protein L7a pseudogene
M0_MCSF	Up	Gm42492	NA	NA
M0_MCSF	Up	A130071D04Rik	320791	RIKEN cDNA A130071D04 gene
M0_MCSF	Up	Gm43061	NA	NA
M0_MCSF	Up	Gm43332	NA	NA
M0_MCSF	Up	Gm43011	NA	NA
M0_MCSF	Up	Gm45041	NA	NA
M0_MCSF	Up	Fam214a	235493	family with sequence similarity 214, member A
M0_MCSF	Up	Gm10093	15181	histone deacetylase 1 pseudogene
M0_MCSF	Up	Dlgap5	218977	DLG associated protein 5
M0_MCSF	Up	Dock9	105445	dedicator of cytokinesis 9
M0_MCSF	Up	Gm17112	NA	NA
M0_MCSF	Up	Gm8369	666926	predicted gene 8369
M0_MCSF	Up	Gm6793	627828	heterogeneous nuclear ribonucleoprotein A3 pseudogene
M0_MCSF	Up	Neo1	18007	neogenin
M0_MCSF	Up	Gm5431	432555	predicted gene 5431
M0_MCSF	Up	Zmynd10	114602	zinc finger, MYND domain containing 10
M0_MCSF	Up	4930539E08Rik	207819	RIKEN cDNA 4930539E08 gene
M0_MCSF	Up	Gm43029	NA	NA
M0_MCSF	Up	Sh2d3c	27387	SH2 domain containing 3C
M0_MCSF	Up	Ms4a6b	69774	membrane-spanning 4-domains, subfamily A, member 6B
M0_MCSF	Up	Gm4598	100043706	predicted gene 4598
M0_MCSF	Up	Btg2	12227	B cell translocation gene 2, anti-proliferative
M0_MCSF	Up	Gtse1	29870	G two S phase expressed protein 1
M0_MCSF	Up	Ect2	13605	ect2 oncogene
M0_MCSF	Up	Gm23851	NA	NA
M0_MCSF	Up	Ifit1	15957	interferon-induced protein with tetratricopeptide repeats 1
M0_MCSF	Up	Ptms	69202	parathymosin
M0_MCSF	Up	4930481A15Rik	74931	RIKEN cDNA 4930481A15 gene
M0_MCSF	Up	A430018G15Rik	414078	RIKEN cDNA A430018G15 gene
M0_MCSF	Up	Gm12188	102640062	predicted gene 12188
M0_MCSF	Up	Zc3h12d	237256	zinc finger CCCH type containing 12D
M0_MCSF	Up	4930517G19Rik	74727	RIKEN cDNA 4930517G19 gene
M0_MCSF	Up	Cdca3	14793	cell division cycle associated 3
M0_MCSF	Up	Vangl1	229658	VANGL planar cell polarity 1
M0_MCSF	Up	Pard3b	72823	par-3 family cell polarity regulator beta
M0_MCSF	Up	Kif18a	228421	kinesin family member 18A
M0_MCSF	Up	Tlr11	239081	toll-like receptor 11
M0_MCSF	Up	Bcl6	12053	B cell leukemia/lymphoma 6
M0_MCSF	Up	Gm14308	100043381	predicted gene 14308
M0_MCSF	Up	Hist1h2bg	319181	histone cluster 1, H2bg
M0_MCSF	Up	Gm16034	NA	NA
M0_MCSF	Up	Nexn	68810	nexilin
M0_MCSF	Up	Plekha4	69217	pleckstrin homology domain containing, family A (phosphoinositide binding specific) member 4
M0_MCSF	Up	1700027A07Rik	69996	RIKEN cDNA 1700027A07 gene
M0_MCSF	Up	Gm43154	NA	NA
M0_MCSF	Up	Gm9873	791354	predicted gene 9873
M0_MCSF	Up	Gm27252	102634962	predicted gene 27252
M0_MCSF	Up	2500004C02Rik	72326	RIKEN cDNA 2500004C02 gene
M0_MCSF	Up	Gm43197	NA	NA
M0_MCSF	Up	Gm11633	100502691	cytochrome c oxidase subunit 5A, mitochondrial-like
M0_MCSF	Up	Osbpl10	74486	oxysterol binding protein-like 10
M0_MCSF	Up	Ugt1a1	394436	UDP glucuronosyltransferase 1 family, polypeptide A1
M0_MCSF	Up	Cadm1	54725	cell adhesion molecule 1
M0_MCSF	Up	Bbc3	170770	BCL2 binding component 3
M0_MCSF	Up	Fzd8	14370	frizzled class receptor 8
M0_MCSF	Up	Gm11335	100034675	predicted gene 11335
M0_MCSF	Up	Gm27868	NA	NA
M0_MCSF	Up	Calhm2	72691	calcium homeostasis modulator family member 2
M0_MCSF	Up	AI607873	NA	NA
M0_MCSF	Up	Gm20900	100042058	predicted gene, 20900
M0_MCSF	Up	C330027C09Rik	NA	NA
M0_MCSF	Up	Fhad1	329977	forkhead-associated (FHA) phosphopeptide binding domain 1
M0_MCSF	Up	Arhgap18	73910	Rho GTPase activating protein 18
M0_MCSF	Up	Ahrr	11624	aryl-hydrocarbon receptor repressor
M0_MCSF	Up	4933406C10Rik	74076	RIKEN cDNA 4933406C10 gene
M0_MCSF	Up	Cdc25b	12531	cell division cycle 25B
M0_MCSF	Up	Hist1h1b	56702	histone cluster 1, H1b
M0_MCSF	Up	Igtp	16145	interferon gamma induced GTPase
M0_MCSF	Up	Pcdhga7	93715	protocadherin gamma subfamily A, 7
M0_MCSF	Up	Arhgef10l	72754	Rho guanine nucleotide exchange factor (GEF) 10-like
M0_MCSF	Up	Poln	272158	DNA polymerase N
M0_MCSF	Up	Gm4973	244214	guanosine diphosphate (GDP) dissociation inhibitor 2 pseudogene
M0_MCSF	Up	Gm20511	102638125	predicted gene 20511
M0_MCSF	Up	Gm31728	102634049	predicted gene, 31728
M0_MCSF	Up	Ska2	66140	spindle and kinetochore associated complex subunit 2
M0_MCSF	Up	Ophn1	94190	oligophrenin 1
M0_MCSF	Up	Gm7308	640703	calmodulin 2 pseudogene
M0_MCSF	Up	Mir6244	102465150	microRNA 6244
M0_MCSF	Up	Gm44850	NA	NA
M0_MCSF	Up	Gm13651	623706	phosphoribosyl pyrophosphate synthetase-associated protein 2 pseudogene
M0_MCSF	Up	Cenpu	71876	centromere protein U
M0_MCSF	Up	Slc17a8	216227	solute carrier family 17 (sodium-dependent inorganic phosphate cotransporter), member 8
M0_MCSF	Up	Mndal	100040462	myeloid nuclear differentiation antigen like
M0_MCSF	Up	Abca9	217262	ATP-binding cassette, sub-family A (ABC1), member 9
M0_MCSF	Up	Pif1	208084	PIF1 5'-to-3' DNA helicase
M0_MCSF	Up	Gm15772	100034726	ribosomal protein L26 pseudogene
M0_MCSF	Up	Olfml2a	241327	olfactomedin-like 2A
M0_MCSF	Up	Gm8225	666668	ribosomal protein S2 pseudogene
M0_MCSF	Up	Gm26867	NA	NA
M0_MCSF	Up	Sncaip	67847	synuclein, alpha interacting protein (synphilin)
M0_MCSF	Up	Gm26826	NA	NA
M0_MCSF	Up	1810062O18Rik	75602	RIKEN cDNA 1810062O18 gene
M0_MCSF	Up	Gm16253	105244506	predicted gene 16253
M0_MCSF	Up	Smim1	68859	small integral membrane protein 1
M0_MCSF	Up	Zfp36l2	12193	zinc finger protein 36, C3H type-like 2
M0_MCSF	Up	Misp	78906	mitotic spindle positioning
M0_MCSF	Up	Gm1862	NA	NA
M0_MCSF	Up	Styx	56291	serine/threonine/tyrosine interaction protein
M0_MCSF	Up	Gm6969	629383	cytochrome c oxidase subunit VIIa polypeptide 2-like pseudogene
M0_MCSF	Up	Gdpd2	71584	glycerophosphodiester phosphodiesterase domain containing 2
M0_MCSF	Up	Gm15774	105243045	predicted gene 15774
M0_MCSF	Up	Gm5605	100417643	corepressor interacting with RBPJ, 1 pseudogene
M0_MCSF	Up	Apoa2	11807	apolipoprotein A-II
M0_MCSF	Up	Gbp5	229898	guanylate binding protein 5
M0_MCSF	Up	Gm8515	667207	chromatin modifying protein 1A pseudogene
M0_MCSF	Up	Rrad	56437	Ras-related associated with diabetes
M0_MCSF	Up	Crebrf	77128	CREB3 regulatory factor
M0_MCSF	Up	Gm26711	NA	NA
M0_MCSF	Up	AV099323	102633666	expressed sequence AV099323
M0_MCSF	Up	Ncmap	230822	noncompact myelin associated protein
M0_MCSF	Up	Slc10a1	20493	solute carrier family 10 (sodium/bile acid cotransporter family), member 1
M0_MCSF	Up	Tcea1-ps1	56645	transcription elongation factor A (SII) 1, pseudogene 1
M0_MCSF	Up	Cd5	12507	CD5 antigen
M0_MCSF	Up	Zfp36	22695	zinc finger protein 36
M0_MCSF	Up	Frat1	14296	frequently rearranged in advanced T cell lymphomas
M0_MCSF	Up	Ms4a2	14126	membrane-spanning 4-domains, subfamily A, member 2
M0_MCSF	Up	Rpsa-ps12	666774	ribosomal protein SA, pseudogene 12
M0_MCSF	Up	Gm26533	105246388	predicted gene, 26533
M0_MCSF	Up	Gm12185	620913	predicted gene 12185
M0_MCSF	Up	Gm44545	NA	NA
M0_MCSF	Up	Entpd1	12495	ectonucleoside triphosphate diphosphohydrolase 1
M0_MCSF	Up	Dnaja4	58233	DnaJ heat shock protein family (Hsp40) member A4
M0_MCSF	Up	Angpt4	11602	angiopoietin 4
M0_MCSF	Up	Tusc5	NA	NA
M0_MCSF	Up	Mxra7	67622	matrix-remodelling associated 7
M0_MCSF	Up	Lrrc49	102747	leucine rich repeat containing 49
M0_MCSF	Up	Mir130c	102466640	microRNA 130c
M0_MCSF	Up	Trim34b	434218	tripartite motif-containing 34B
M0_MCSF	Up	Gm26912	NA	NA
M0_MCSF	Up	Gm17147	102632836	predicted gene 17147
M0_MCSF	Up	Fut10	171167	fucosyltransferase 10
M0_MCSF	Up	D930028M14Rik	434147	RIKEN cDNA D930028M14 gene
M0_MCSF	Up	Cryba4	12959	crystallin, beta A4
M0_MCSF	Up	Rpsa-ps9	665412	ribosomal protein SA, pseudogene 9
M0_MCSF	Up	Gm15503	100043643	predicted gene 15503
M0_MCSF	Up	Zfp354b	27274	zinc finger protein 354B
M0_MCSF	Up	Kif20b	240641	kinesin family member 20B
M0_MCSF	Up	Hist1h2be	319179	histone cluster 1, H2be
M0_MCSF	Up	Raph1	77300	Ras association (RalGDS/AF-6) and pleckstrin homology domains 1
M0_MCSF	Up	Gm16589	631071	axin interaction partner and dorsalization antagonist pseudogene
M0_MCSF	Up	Oasl2	23962	2'-5' oligoadenylate synthetase-like 2
M0_MCSF	Up	Smim24	72273	small integral membrane protein 24
M0_MCSF	Up	Gm7516	665145	ribosomal protein SA pseudogene
M0_MCSF	Up	Gm10297	100041211	G kinase anchoring protein 1 pseudogene
M0_MCSF	Up	Gm38048	NA	NA
M0_MCSF	Up	Itga8	241226	integrin alpha 8
M0_MCSF	Up	Tnfsf8	21949	tumor necrosis factor (ligand) superfamily, member 8
M0_MCSF	Up	Prdm5	70779	PR domain containing 5
M0_MCSF	Up	Gm10433	100038378	predicted gene 10433
M0_MCSF	Up	4933427G23Rik	330053	RIKEN cDNA 4933427G23 gene
M0_MCSF	Up	Gm45186	NA	NA
M0_MCSF	Up	RP23-321G17.9	NA	NA
M0_MCSF	Up	Engase	217364	endo-beta-N-acetylglucosaminidase
M0_MCSF	Up	Apoc1	11812	apolipoprotein C-I
M0_MCSF	Up	Nxpe1-ps	640268	neurexophilin and PC-esterase domain family, member 1, pseudogene
M0_MCSF	Up	Gm26847	102633407	predicted gene, 26847
M0_MCSF	Up	Tcea3	21401	transcription elongation factor A (SII), 3
M0_MCSF	Up	Gpr155	68526	G protein-coupled receptor 155
M0_MCSF	Up	Samd9l	209086	sterile alpha motif domain containing 9-like
M0_MCSF	Up	Fam120aos	68128	family with sequence similarity 120A, opposite strand
M0_MCSF	Up	Gm42849	NA	NA
M0_MCSF	Up	Slfn8	276950	schlafen 8
M0_MCSF	Up	Akap12	83397	A kinase (PRKA) anchor protein (gravin) 12
M0_MCSF	Up	A230083G16Rik	442825	RIKEN cDNA A230083G16 gene
M0_MCSF	Up	Krt80	74127	keratin 80
M0_MCSF	Up	BC022960	237246	cDNA sequence BC022960
M0_MCSF	Up	Siglech	233274	sialic acid binding Ig-like lectin H
M0_MCSF	Up	Gm16033	NA	NA
M0_MCSF	Up	Flt3	14255	FMS-like tyrosine kinase 3
M0_MCSF	Up	Gm4841	225594	predicted gene 4841
M0_MCSF	Up	Sgip1	73094	SH3-domain GRB2-like (endophilin) interacting protein 1
M0_MCSF	Up	Kif11	16551	kinesin family member 11
M0_MCSF	Up	Efhb	211482	EF hand domain family, member B
M0_MCSF	Up	Wnk4	69847	WNK lysine deficient protein kinase 4
M0_MCSF	Up	2510017J16Rik	66574	RIKEN cDNA 2510017J16 gene
M0_MCSF	Up	Gm28875	NA	NA
M0_MCSF	Up	Gm9645	675537	ribosomal protein L7A pseudogene
M0_MCSF	Up	Cep85	70012	centrosomal protein 85
M0_MCSF	Up	Prc1	233406	protein regulator of cytokinesis 1
M0_MCSF	Up	Ncapd2	68298	non-SMC condensin I complex, subunit D2
M0_MCSF	Up	6030445D17Rik	320133	RIKEN cDNA 6030445D17 gene
M0_MCSF	Up	4930562F07Rik	75255	RIKEN cDNA 4930562F07 gene
M0_MCSF	Up	Tpx2	72119	TPX2, microtubule-associated
M0_MCSF	Up	Gm10689	100113396	predicted gene 10689
M0_MCSF	Up	Gm37988	NA	NA
M0_MCSF	Up	Gm43650	NA	NA
M0_MCSF	Up	Gm26508	NA	NA
M0_MCSF	Up	Lpar5	381810	lysophosphatidic acid receptor 5
M0_MCSF	Up	Cenpa	12615	centromere protein A
M0_MCSF	Up	Tshz3	243931	teashirt zinc finger family member 3
M0_MCSF	Up	Gm11642	NA	NA
M0_MCSF	Up	Gm37860	NA	NA
M0_MCSF	Up	Rps15a-ps1	639162	ribosomal protein S15A, pseudogene 1
M0_MCSF	Up	Birc5	11799	baculoviral IAP repeat-containing 5
M0_MCSF	Up	Klra17	170733	killer cell lectin-like receptor, subfamily A, member 17
M0_MCSF	Up	Hist1h3b	319150	histone cluster 1, H3b
M0_MCSF	Up	Tas1r1	110326	taste receptor, type 1, member 1
M0_MCSF	Up	Eef2k	13631	eukaryotic elongation factor-2 kinase
M0_MCSF	Up	P2ry12	70839	purinergic receptor P2Y, G-protein coupled 12
M0_MCSF	Up	Tmem266	244886	transmembrane protein 266
M0_MCSF	Up	Dyrk3	226419	dual-specificity tyrosine-(Y)-phosphorylation regulated kinase 3
M0_MCSF	Up	Gm22175	NA	NA
M0_MCSF	Up	Depdc1b	218581	DEP domain containing 1B
M0_MCSF	Up	Ptpro	19277	protein tyrosine phosphatase, receptor type, O
M0_MCSF	Up	Gm11989	665380	predicted gene 11989
M0_MCSF	Up	Mzf1	109889	myeloid zinc finger 1
M0_MCSF	Up	Abcb4	18670	ATP-binding cassette, sub-family B (MDR/TAP), member 4
M0_MCSF	Up	Pdk4	27273	pyruvate dehydrogenase kinase, isoenzyme 4
M0_MCSF	Up	Gm13127	666215	microspherule protein 1 pseudogene
M0_MCSF	Up	Agbl5	231093	ATP/GTP binding protein-like 5
M0_MCSF	Up	C230035I16Rik	320842	RIKEN cDNA C230035I16 gene
M0_MCSF	Up	Pmaip1	58801	phorbol-12-myristate-13-acetate-induced protein 1
M0_MCSF	Up	Lrrc16a	NA	NA
M0_MCSF	Up	Depdc1a	76131	DEP domain containing 1a
M0_MCSF	Up	A530032D15Rik	381287	RIKEN cDNA A530032D15Rik gene
M0_MCSF	Up	Klrb1f	232408	killer cell lectin-like receptor subfamily B member 1F
M0_MCSF	Up	Slc16a8	57274	solute carrier family 16 (monocarboxylic acid transporters), member 8
M0_MCSF	Up	Gm15519	434076	ADP-ribosylation factor GTPase activating protein 2 pseudogene
M0_MCSF	Up	Gm16576	100504191	predicted gene 16576
M0_MCSF	Up	9930111J21Rik2	245240	RIKEN cDNA 9930111J21 gene 2
M0_MCSF	Up	Gm12999	NA	NA
M0_MCSF	Up	Il6ra	16194	interleukin 6 receptor, alpha
M0_MCSF	Up	2310043P16Rik	70135	RIKEN cDNA 2310043P16 gene
M0_MCSF	Up	Gm17909	100416078	Y box protein 1 pseudogene
M0_MCSF	Up	Aspa	11484	aspartoacylase
M0_MCSF	Up	Gm44878	NA	NA
M0_MCSF	Up	Chrdl1	83453	chordin-like 1
M0_MCSF	Up	Ms4a4a	666907	membrane-spanning 4-domains, subfamily A, member 4A
M0_MCSF	Up	Gm15846	NA	NA
M0_MCSF	Up	Vis1	110153	viral integration site 1
M0_MCSF	Up	Fgd1	14163	FYVE, RhoGEF and PH domain containing 1
M0_MCSF	Up	Gm14052	626513	heterogeneous nuclear ribonucleoprotein A3 pseudogene
M0_MCSF	Up	Cytip	227929	cytohesin 1 interacting protein
M0_MCSF	Up	Sik1	17691	salt inducible kinase 1
M0_MCSF	Up	Cdc25c	12532	cell division cycle 25C
M0_MCSF	Up	Gm8226	666669	ribosomal protein L7A pseudogene
M0_MCSF	Up	Gm12279	100503292	predicted gene 12279
M0_MCSF	Up	Olfr756-ps1	257805	olfactory receptor 756, pseudogene 1
M0_MCSF	Up	Tsku	244152	tsukushi, small leucine rich proteoglycan
M0_MCSF	Up	Aurkb	20877	aurora kinase B
M0_MCSF	Up	Rapgef3os2	100503050	Rap guanine nucleotide exchange factor (GEF) 3, opposite strand 2
M0_MCSF	Up	Dtx3l	209200	deltex 3-like, E3 ubiquitin ligase
M0_MCSF	Up	Gm44430	NA	NA
M0_MCSF	Up	Inpp1	16329	inositol polyphosphate-1-phosphatase
M0_MCSF	Up	Notch4	18132	notch 4
M0_MCSF	Up	Cnnm2	94219	cyclin M2
M0_MCSF	Up	Gm15133	622070	predicted gene 15133
M0_MCSF	Up	Myl2	17906	myosin, light polypeptide 2, regulatory, cardiac, slow
M0_MCSF	Up	Gm17251	100502751	predicted gene, 17251
M0_MCSF	Up	Tspan13	66109	tetraspanin 13
M0_MCSF	Up	Bub1b	12236	BUB1B, mitotic checkpoint serine/threonine kinase
M0_MCSF	Up	Cdk15	271697	cyclin-dependent kinase 15
M0_MCSF	Up	Gm21411	102632316	predicted gene, 21411
M0_MCSF	Up	Rbms3	207181	RNA binding motif, single stranded interacting protein
M0_MCSF	Up	Slc16a4	229699	solute carrier family 16 (monocarboxylic acid transporters), member 4
M0_MCSF	Up	Tcte2	21646	t-complex-associated testis expressed 2
M0_MCSF	Up	Gm13712	100306931	CTAGE family, member 5 pseudogene
M0_MCSF	Up	Gm26672	NA	NA
M0_MCSF	Up	Gm26610	NA	NA
M0_MCSF	Up	Casc1	320662	cancer susceptibility candidate 1
M0_MCSF	Up	Pcdh1	75599	protocadherin 1
M0_MCSF	Up	Gm20482	102632136	predicted gene 20482
M0_MCSF	Up	Gm43982	NA	NA
M0_MCSF	Up	Sesn1	140742	sestrin 1
M0_MCSF	Up	Gm20878	100041579	predicted gene, 20878
M0_MCSF	Up	Gbp3	55932	guanylate binding protein 3
M0_MCSF	Up	Gm11285	665690	predicted gene 11285
M0_MCSF	Up	Cenpn	72155	centromere protein N
M0_MCSF	Up	Prr18	320111	proline rich 18
M0_MCSF	Up	Gm12250	631323	predicted gene 12250
M0_MCSF	Up	Kcnj13	100040591	potassium inwardly-rectifying channel, subfamily J, member 13
M0_MCSF	Up	Frmd8os	69595	FERM domain containing 8, opposite strand
M0_MCSF	Up	Cbx3-ps6	629578	chromobox 3, pseudogene 6
M0_MCSF	Up	Glul	14645	glutamate-ammonia ligase (glutamine synthetase)
M0_MCSF	Up	Tmem150b	330460	transmembrane protein 150B
M0_MCSF	Up	Nkd1	93960	naked cuticle 1
M0_MCSF	Up	Fam212a	NA	NA
M0_MCSF	Up	Slc26a11	268512	solute carrier family 26, member 11
M0_MCSF	Up	Rassf2	215653	Ras association (RalGDS/AF-6) domain family member 2
M0_MCSF	Up	Traip	22036	TRAF-interacting protein
M0_MCSF	Up	Gm7895	666025	protein phosphatase 1B, magnesium dependent, beta isoform pseudogene
M0_MCSF	Up	Itga4	16401	integrin alpha 4
M0_MCSF	Up	Csl	71832	citrate synthase like
M0_MCSF	Up	Stac	20840	src homology three (SH3) and cysteine rich domain
M0_MCSF	Up	Gm8401	666981	YTH domain family 2 pseudogene
M0_MCSF	Up	Gm3436	100041622	ribosomal RNA processing 7 homolog A pseudogene
M0_MCSF	Up	Gm43714	NA	NA
M0_MCSF	Up	4933408B17Rik	271508	RIKEN cDNA 4933408B17 gene
M0_MCSF	Up	Gm27517	NA	NA
M0_MCSF	Up	Mir29c	387224	microRNA 29c
M0_MCSF	Up	Glcci1	170772	glucocorticoid induced transcript 1
M0_MCSF	Up	Rgs10	67865	regulator of G-protein signalling 10
M0_MCSF	Up	Lpin2	64898	lipin 2
M0_MCSF	Up	Mrpl48-ps	269553	mitochondrial ribosomal protein L48 pseudogene
M0_MCSF	Up	Gm7846	665903	predicted gene 7846
M0_MCSF	Up	Evi2a	14017	ecotropic viral integration site 2a
M0_MCSF	Up	Gm13192	100040426	40S ribosomal protein S28 pseudogene
M0_MCSF	Up	Gm15873	NA	NA
M0_MCSF	Up	Gm9694	676894	predicted gene 9694
M0_MCSF	Up	Pml	18854	promyelocytic leukemia
M0_MCSF	Up	Pot1b	72836	protection of telomeres 1B
M0_MCSF	Up	Ccna2	12428	cyclin A2
M0_MCSF	Up	Amica1	NA	NA
M0_MCSF	Up	Fam105a	NA	NA
M0_MCSF	Up	Hmgb1-ps3	15295	high mobility group box 1, pseudogene 3
M0_MCSF	Up	Slc17a7	72961	solute carrier family 17 (sodium-dependent inorganic phosphate cotransporter), member 7
M0_MCSF	Up	4632432E15Rik	74046	RIKEN cDNA 4632432E15 gene
M0_MCSF	Up	Gm43041	NA	NA
M0_MCSF	Up	Pbx4	80720	pre B cell leukemia homeobox 4
M0_MCSF	Up	Irgm1	15944	immunity-related GTPase family M member 1
M0_MCSF	Up	Gm11399	108167875	predicted gene 11399
M0_MCSF	Up	Fam83f	213956	family with sequence similarity 83, member F
M0_MCSF	Up	Tmem255b	272465	transmembrane protein 255B
M0_MCSF	Up	Hist1h2bq	665596	histone cluster 1, H2bq
M0_MCSF	Up	RP23-72K19.2	NA	NA
M0_MCSF	Up	Gm10643	100038416	predicted gene 10643
M0_MCSF	Up	Gm12060	NA	NA
M0_MCSF	Up	Gm4613	100043732	60S ribosomal protein L37a pseudogene
M0_MCSF	Up	Gm14108	383752	cofilin 1, non-muscle pseudogene
M0_MCSF	Up	Gm13803	621146	corepressor interacting with RBPJ, 1 pseudogene
M0_MCSF	Up	Gm6254	621710	heterogeneous nuclear ribonucleoprotein A3 pseudogene
M0_MCSF	Up	Rpl29-ps5	666111	ribosomal protein L29, pseudogene 5
M0_MCSF	Up	1810008B01Rik	69062	RIKEN cDNA 1810008B01 gene
M0_MCSF	Up	Derl3	70377	Der1-like domain family, member 3
M0_MCSF	Up	Tmem254b	100039257	transmembrane protein 254b
M0_MCSF	Up	Tmem254a	66039	transmembrane protein 254a
M0_MCSF	Up	Ccdc158	320696	coiled-coil domain containing 158
M0_MCSF	Up	Gprc5c	70355	G protein-coupled receptor, family C, group 5, member C
M0_MCSF	Up	Gm15066	100039243	eukaryotic translation elongation factor pseudogene
M0_MCSF	Up	Cc2d2a	231214	coiled-coil and C2 domain containing 2A
M0_MCSF	Up	Gm6039	572559	protein phosphatase 4, regulatory subunit 2 pseudogene
M0_MCSF	Up	Rdm1	66599	RAD52 motif 1
M0_MCSF	Up	Arid4a	238247	AT rich interactive domain 4A (RBP1-like)
M0_MCSF	Up	Rnf207	433809	ring finger protein 207
M0_MCSF	Up	Bmyc	107771	brain expressed myelocytomatosis oncogene
M0_MCSF	Up	Gm11696	100036768	predicted gene 11696
M0_MCSF	Up	Gm37494	NA	NA
M0_MCSF	Up	Fap	14089	fibroblast activation protein
M0_MCSF	Up	Gm4832	225058	predicted gene 4832
M0_MCSF	Up	Rell1	100532	RELT-like 1
M0_MCSF	Up	Frmd4a	209630	FERM domain containing 4A
M0_MCSF	Up	Hspb2	69253	heat shock protein 2
M0_MCSF	Up	Fsip1	71313	fibrous sheath-interacting protein 1
M0_MCSF	Up	Cdca2	108912	cell division cycle associated 2
M0_MCSF	Up	Ccnf	12449	cyclin F
M0_MCSF	Up	Cd86	12524	CD86 antigen
M0_MCSF	Up	Mccc1os	654424	methylcrotonoyl-Coenzyme A carboxylase 1 (alpha), opposite strand
M0_MCSF	Up	Gm26947	102640832	predicted gene, 26947
M0_MCSF	Up	Timm10b|2	NA	NA
M0_MCSF	Up	Prkcz	18762	protein kinase C, zeta
M0_MCSF	Up	Hba-a2	110257	hemoglobin alpha, adult chain 2
M0_MCSF	Up	Cd300a	217303	CD300A molecule
M0_MCSF	Up	Tmem176a	66058	transmembrane protein 176A
M0_MCSF	Up	Gm42936	NA	NA
M0_MCSF	Up	Gm8083	666397	ribosomal protein L21 pseudogene
M0_MCSF	Up	Gm28874	102640216	predicted gene 28874
M0_MCSF	Up	Nfia	18027	nuclear factor I/A
M0_MCSF	Up	4930426L09Rik	74629	RIKEN cDNA 4930426L09 gene
M0_MCSF	Up	Gm24265	NA	NA
M0_MCSF	Up	Abhd15	67477	abhydrolase domain containing 15
M0_MCSF	Up	Gm38329	NA	NA
M0_MCSF	Up	Ncam2	17968	neural cell adhesion molecule 2
M0_MCSF	Up	Sdsl	257635	serine dehydratase-like
M0_MCSF	Up	4921507P07Rik	70821	RIKEN cDNA 4921507P07 gene
M0_MCSF	Up	Stx1b	56216	syntaxin 1B
M0_MCSF	Up	Zswim5	74464	zinc finger SWIM-type containing 5
M0_MCSF	Up	Gm5464	432870	predicted gene 5464
M0_MCSF	Up	Gm13398	102640749	predicted gene 13398
M0_MCSF	Up	9230104M06Rik	791402	RIKEN cDNA 9230104M06 gene
M0_MCSF	Up	Gm26538	NA	NA
M0_MCSF	Up	Fgd2	26382	FYVE, RhoGEF and PH domain containing 2
M0_MCSF	Up	Itpr1	16438	inositol 1,4,5-trisphosphate receptor 1
M0_MCSF	Up	Oas2	246728	2'-5' oligoadenylate synthetase 2
M0_MCSF	Up	Frmd6	319710	FERM domain containing 6
M0_MCSF	Up	Kif4	16571	kinesin family member 4
M0_MCSF	Up	Tpt1-ps4	665999	tumor protein, translationally-controlled, pseudogene 4
M0_MCSF	Up	Vsig10	231668	V-set and immunoglobulin domain containing 10
M0_MCSF	Up	4930486L24Rik	214639	RIKEN cDNA 4930486L24 gene
M0_MCSF	Up	Cfap126	75472	cilia and flagella associated protein 126
M0_MCSF	Up	Tab2	68652	TGF-beta activated kinase 1/MAP3K7 binding protein 2
M0_MCSF	Up	Sox9	20682	SRY (sex determining region Y)-box 9
M0_MCSF	Up	Gm5145	381065	small nuclear ribonucleoprotein polypeptide A pseudogene
M0_MCSF	Up	Gm7099	633030	predicted gene 7099
M0_MCSF	Up	Gm27406	NA	NA
M0_MCSF	Up	D630036G22Rik	442807	RIKEN cDNA D630036G22 gene
M0_MCSF	Up	Prr5	109270	proline rich 5 (renal)
M0_MCSF	Up	Rps26-ps1	100042812	ribosomal protein S26, pseudogene 1
M0_MCSF	Up	Fam227a	75729	family with sequence similarity 227, member A
M0_MCSF	Up	Plekhg3	263406	pleckstrin homology domain containing, family G (with RhoGef domain) member 3
M0_MCSF	Up	Tfap2a	21418	transcription factor AP-2, alpha
M0_MCSF	Up	Gm43420	NA	NA
M0_MCSF	Up	Tnfsf13os	100503827	tumor necrosis factor (ligand) superfamily, member 13, opposite strand
M0_MCSF	Up	Gm13421	100504144	predicted gene 13421
M0_MCSF	Up	Cd300ld5	100043125	CD300 molecule like family member D5
M0_MCSF	Up	Dcdc2b	100504491	doublecortin domain containing 2b
M0_MCSF	Up	Dnajc28	246738	DnaJ heat shock protein family (Hsp40) member C28
M0_MCSF	Up	Gm43503	NA	NA
M0_MCSF	Up	Gm42683	NA	NA
M0_MCSF	Up	Gm7784	665782	glyceraldehyde-3-phosphate dehydrogenase pseudogene
M0_MCSF	Up	Fam107b	66540	family with sequence similarity 107, member B
M0_MCSF	Up	Ms4a6c	73656	membrane-spanning 4-domains, subfamily A, member 6C
M0_MCSF	Up	Ifih1	71586	interferon induced with helicase C domain 1
M0_MCSF	Up	Gm16161	NA	NA
M0_MCSF	Up	Aurka	20878	aurora kinase A
M0_MCSF	Up	Cep72	74470	centrosomal protein 72
M0_MCSF	Up	Gm14302	NA	NA
M0_MCSF	Up	Gm16098	NA	NA
M0_MCSF	Up	Gm6195	108167613	replication protein A 14 kDa subunit pseudogene
M0_MCSF	Up	9930111J21Rik1	667214	RIKEN cDNA 9930111J21 gene 1
M0_MCSF	Up	Micalcl	100504195	MICAL C-terminal like
M0_MCSF	Up	Lin7b	22342	lin-7 homolog B (C. elegans)
M0_MCSF	Up	Gm26857	NA	NA
M0_MCSF	Up	Lyl1	17095	lymphoblastomic leukemia 1
M0_MCSF	Up	Kif26b	269152	kinesin family member 26B
M0_MCSF	Up	Gm44567	NA	NA
M0_MCSF	Up	Gm8615	667410	glucosamine-6-phosphate deaminase 1 pseudogene
M0_MCSF	Up	Gm42879	NA	NA
M0_MCSF	Up	Gm7638	665450	predicted gene 7638
M0_MCSF	Up	RP24-423F11.1	NA	NA
M0_MCSF	Up	Gm16984	102640991	predicted gene, 16984
M0_MCSF	Up	Pde7b	29863	phosphodiesterase 7B
M0_MCSF	Up	9530052C20Rik	320229	RIKEN cDNA 9530052C20 gene
M0_MCSF	Up	RP24-225H21.2	NA	NA
M0_MCSF	Up	Rhbdl3	246104	rhomboid like 3
M0_MCSF	Up	Gp5	14729	glycoprotein 5 (platelet)
M0_MCSF	Up	Gm28052	NA	NA
M0_MCSF	Up	Smtn	29856	smoothelin
M0_MCSF	Up	Gm16386	100042679	zinc finger protein 946 pseudogene
M0_MCSF	Up	Fam72a	108900	family with sequence similarity 72, member A
M0_MCSF	Up	Gm13331	664822	ubiquitin-conjugating enzyme E2D 3 pseudogene
M0_MCSF	Up	Mogat2	233549	monoacylglycerol O-acyltransferase 2
M0_MCSF	Up	Gm8412	666997	predicted gene 8412
M0_MCSF	Up	Tsc22d3	14605	TSC22 domain family, member 3
M0_MCSF	Up	Ifi47	15953	interferon gamma inducible protein 47
M0_MCSF	Up	Hist2h2aa1	15267	histone cluster 2, H2aa1
M0_MCSF	Up	Ndc80	67052	NDC80 kinetochore complex component
M0_MCSF	Up	Gm43802	NA	NA
M0_MCSF	Up	Mbd4	17193	methyl-CpG binding domain protein 4
M0_MCSF	Up	Limd2	67803	LIM domain containing 2
M0_MCSF	Up	Pip4k2a	18718	phosphatidylinositol-5-phosphate 4-kinase, type II, alpha
M0_MCSF	Up	4930507D05Rik	74706	RIKEN cDNA 4930507D05 gene
M0_MCSF	Up	Gm10687	100038560	predicted gene 10687
M0_MCSF	Up	1700025N23Rik	69986	RIKEN cDNA 1700025N23 gene
M0_MCSF	Up	Rpl36-ps3	100043215	ribosomal protein L36, pseudogene 3
M0_MCSF	Up	Ssbp2	66970	single-stranded DNA binding protein 2
M0_MCSF	Up	Gm26536	102639417	predicted gene, 26536
M0_MCSF	Up	Parp8	52552	poly (ADP-ribose) polymerase family, member 8
M0_MCSF	Up	Gm9830	100048057	family with sequence similarity 103, member A1 pseudogene
M0_MCSF	Up	Sgsh	27029	N-sulfoglucosamine sulfohydrolase (sulfamidase)
M0_MCSF	Up	Gm44002	NA	NA
M0_MCSF	Up	Nckap5los	102637966	NCK-associated protein 5-like, opposite strand
M0_MCSF	Up	Spns3	77577	spinster homolog 3
M0_MCSF	Up	Ecscr	68545	endothelial cell surface expressed chemotaxis and apoptosis regulator
M0_MCSF	Up	Hist1h3i	319153	histone cluster 1, H3i
M0_MCSF	Up	Gm13150	NA	NA
M0_MCSF	Up	Eme1	268465	essential meiotic structure-specific endonuclease 1
M0_MCSF	Up	Gm12036	NA	NA
M0_MCSF	Up	Gm26804	NA	NA
M0_MCSF	Up	Rps11-ps2	668255	ribosomal protein S11, pseudogene 2
M0_MCSF	Up	Kansl1l	68691	KAT8 regulatory NSL complex subunit 1-like
M0_MCSF	Up	Pcp4l1	66425	Purkinje cell protein 4-like 1
M0_MCSF	Up	9930120I10Rik	77746	RIKEN cDNA 9930120I10 gene
M0_MCSF	Up	Gm15994	NA	NA
M0_MCSF	Up	Gm12932	NA	NA
M0_MCSF	Up	Gm11760	100384873	ribosomal protein L7A pseudogene
M0_MCSF	Up	Zfp36l1	12192	zinc finger protein 36, C3H type-like 1
M0_MCSF	Up	Cenpq	83815	centromere protein Q
M0_MCSF	Up	Flt4	14257	FMS-like tyrosine kinase 4
M0_MCSF	Up	Zfp651	270210	zinc finger protein 651
M0_MCSF	Up	Gbp2	14469	guanylate binding protein 2
M0_MCSF	Up	Gm13886	668744	TAR DNA binding protein pseudogene
M0_MCSF	Up	Tlr7	170743	toll-like receptor 7
M0_MCSF	Up	Hes1	15205	hes family bHLH transcription factor 1
M0_MCSF	Up	Tns1	21961	tensin 1
M0_MCSF	Up	Gm12843	102637763	predicted gene 12843
M0_MCSF	Up	Tor1aip1	208263	torsin A interacting protein 1
M0_MCSF	Up	2210411M09Rik	70176	RIKEN cDNA 2210411M09 gene
M0_MCSF	Up	Gm15996	NA	NA
M0_MCSF	Up	Clec2g	70809	C-type lectin domain family 2, member g
M0_MCSF	Up	Zdhhc15	108672	zinc finger, DHHC domain containing 15
M0_MCSF	Up	Gm5912	546088	G patch domain and KOW motifs pseudogene
M0_MCSF	Up	Gm15675	105246705	predicted gene 15675
M0_MCSF	Up	Sspn	16651	sarcospan
M0_MCSF	Up	Susd3	66329	sushi domain containing 3
M0_MCSF	Up	2900089D17Rik	67277	RIKEN cDNA 2900089D17 gene
M0_MCSF	Up	Ifi203	15950	interferon activated gene 203
M0_MCSF	Up	Fam110a	73847	family with sequence similarity 110, member A
M0_MCSF	Up	Unc13b	22249	unc-13 homolog B
M0_MCSF	Up	Hmgb1-ps8	667280	high mobility group box 1, pseudogene 8
M0_MCSF	Up	Ddx58	230073	DEAD (Asp-Glu-Ala-Asp) box polypeptide 58
M0_MCSF	Up	Armc2	213402	armadillo repeat containing 2
M0_MCSF	Up	Gm10605	100038557	predicted gene 10605
M0_MCSF	Up	Apc	11789	adenomatosis polyposis coli
M0_MCSF	Up	Gm43935	NA	NA
M0_MCSF	Up	1700110C19Rik	76634	RIKEN cDNA 1700110C19 gene
M0_MCSF	Up	Foxm1	14235	forkhead box M1
M0_MCSF	Up	Gm44123	NA	NA
M0_MCSF	Up	Ugt1a7c	394432	UDP glucuronosyltransferase 1 family, polypeptide A7C
M0_MCSF	Up	1810012K08Rik	69095	RIKEN cDNA 1810012K08 gene
M0_MCSF	Up	Nhsl2	100042480	NHS-like 2
M0_MCSF	Up	Sema6c	20360	sema domain, transmembrane domain (TM), and cytoplasmic domain, (semaphorin) 6C
M0_MCSF	Up	Ypel3	66090	yippee like 3
M0_MCSF	Up	Dclre1c	227525	DNA cross-link repair 1C
M0_MCSF	Up	Reps2	194590	RALBP1 associated Eps domain containing protein 2
M0_MCSF	Up	Hk1os	70162	hexokinase 1, opposite strand
M0_MCSF	Up	Gm17705	NA	NA
M0_MCSF	Up	Stbd1	52331	starch binding domain 1
M0_MCSF	Up	Herc6	67138	hect domain and RLD 6
M0_MCSF	Up	Stat1	20846	signal transducer and activator of transcription 1
M0_MCSF	Up	Lyve1	114332	lymphatic vessel endothelial hyaluronan receptor 1
M0_MCSF	Up	Ston1	77057	stonin 1
M0_MCSF	Up	Clec4a3	73149	C-type lectin domain family 4, member a3
M0_MCSF	Up	Rab11b-ps2	665419	RAB11B, member RAS oncogene family, pseudogene 2
M0_MCSF	Up	Fam84b	399603	family with sequence similarity 84, member B
M0_MCSF	Up	Ifi204	15951	interferon activated gene 204
M0_MCSF	Up	0610043K17Rik	68400	RIKEN cDNA 0610043K17 gene
M0_MCSF	Up	mt-Rnr1	17724	s-rRNA
M0_MCSF	Up	RP23-9C19.1	NA	NA
M0_MCSF	Up	Ccnb1	268697	cyclin B1
M0_MCSF	Up	Park2	NA	NA
M0_MCSF	Up	Rnf150	330812	ring finger protein 150
M0_MCSF	Up	Gm26522	NA	NA
M0_MCSF	Up	Nono	53610	non-POU-domain-containing, octamer binding protein
M0_MCSF	Up	Gm19253	100462958	mitochondrial ribosomal protein S36 pseudogene
M0_MCSF	Up	Gm14276	668943	ribosomal protein S2 pseudogene
M0_MCSF	Up	Dek	110052	DEK oncogene (DNA binding)
M0_MCSF	Up	Gm11246	NA	NA
M0_MCSF	Up	Spef2	320277	sperm flagellar 2
M0_MCSF	Up	Rps15a-ps5	100042335	ribosomal protein S15A, pseudogene 5
M0_MCSF	Up	H2afx	15270	H2A histone family, member X
M0_MCSF	Up	9230116N13Rik	320054	RIKEN cDNA 9230116N13 gene
M0_MCSF	Up	Olfr1420	258405	olfactory receptor 1420
M0_MCSF	Up	Gm20691	NA	NA
M0_MCSF	Up	Gm25953	NA	NA
M0_MCSF	Up	Gm16042	100044855	F-box protein 5
M0_MCSF	Up	Slc9a9	331004	solute carrier family 9 (sodium/hydrogen exchanger), member 9
M0_MCSF	Up	Gm10155	100043495	ribosomal protein L21 pseudogene
M0_MCSF	Up	Gm10603	100038497	predicted gene 10603
M0_MCSF	Up	Gm13212	433801	predicted gene 13212
M0_MCSF	Up	Gm26880	NA	NA
M0_MCSF	Up	1700097N02Rik	67522	RIKEN cDNA 1700097N02 gene
M0_MCSF	Up	Olfml3	99543	olfactomedin-like 3
M0_MCSF	Up	Capn3	12335	calpain 3
M0_MCSF	Up	Bloc1s2-ps	625631	biogenesis of lysosomal organelles complex-1, subunit 2, pseudogene
M0_MCSF	Up	Acvr2b	11481	activin receptor IIB
M0_MCSF	Up	Gm21984	NA	NA
M0_MCSF	Up	Neil3	234258	nei like 3 (E. coli)
M0_MCSF	Up	Pik3ip1	216505	phosphoinositide-3-kinase interacting protein 1
M0_MCSF	Up	Parp14	547253	poly (ADP-ribose) polymerase family, member 14
M0_MCSF	Up	Runx2	12393	runt related transcription factor 2
M0_MCSF	Up	Gm15484	100503981	nucleophosmin-like
M0_MCSF	Up	Arhgap17	70497	Rho GTPase activating protein 17
M0_MCSF	Up	Gm44346	NA	NA
M0_MCSF	Up	Tgfb3	21809	transforming growth factor, beta 3
M0_MCSF	Up	Gm9796	544809	predicted gene 9796
M0_MCSF	Up	Gm43965	NA	NA
M0_MCSF	Up	Sh3bp5	24056	SH3-domain binding protein 5 (BTK-associated)
M0_MCSF	Up	Syne3	212073	spectrin repeat containing, nuclear envelope family member 3
M0_MCSF	Up	RP23-385F3.2	NA	NA
M0_MCSF	Up	N4bp2l1	100637	NEDD4 binding protein 2-like 1
M0_MCSF	Up	Crygn	214301	crystallin, gamma N
M0_MCSF	Up	Trim34a	94094	tripartite motif-containing 34A
M0_MCSF	Up	D930015M05Rik	320507	RIKEN cDNA D930015M05 gene
M0_MCSF	Up	Gm18852	NA	NA
M0_MCSF	Up	Gm10550	100049167	predicted gene 10550
M0_MCSF	Up	Prrg1	546336	proline rich Gla (G-carboxyglutamic acid) 1
M0_MCSF	Up	Clec4a1	269799	C-type lectin domain family 4, member a1
M0_MCSF	Up	Mnd1	76915	meiotic nuclear divisions 1
M0_MCSF	Up	2010008C14Rik	69859	RIKEN cDNA 2010008C14 gene
M0_MCSF	Up	Parp9	80285	poly (ADP-ribose) polymerase family, member 9
M0_MCSF	Up	Zscan30	328918	zinc finger and SCAN domain containing 30
M0_MCSF	Up	Gm3448	100041639	predicted gene 3448
M0_MCSF	Up	Ropn1l	252967	ropporin 1-like
M0_MCSF	Up	Gm10357	102640615	predicted gene 10357
M0_MCSF	Up	Mnda	NA	NA
M0_MCSF	Up	Klra9	16640	killer cell lectin-like receptor subfamily A, member 9
M0_MCSF	Up	Iqch	78250	IQ motif containing H
M0_MCSF	Up	Cacna2d4	319734	calcium channel, voltage-dependent, alpha 2/delta subunit 4
M0_MCSF	Up	Zfp541	666528	zinc finger protein 541
M0_MCSF	Up	Gm11599	108167598	40S ribosomal protein S2-like
M0_MCSF	Up	Gm12925	102633214	predicted gene 12925
M0_MCSF	Up	Apold1	381823	apolipoprotein L domain containing 1
M0_MCSF	Up	Gm37106	NA	NA
M0_MCSF	Up	BC055308	407818	cDNA sequence BC055308
M0_MCSF	Up	Gm42725	NA	NA
M0_MCSF	Down	Hlf	217082	hepatic leukemia factor
M0_MCSF	Down	Gm43389	NA	NA
M0_MCSF	Down	Gm7611	665381	predicted gene 7611
M0_MCSF	Down	Hsph1	15505	heat shock 105kDa/110kDa protein 1
M0_MCSF	Down	Creb3l1	26427	cAMP responsive element binding protein 3-like 1
M0_MCSF	Down	Spry2	24064	sprouty RTK signaling antagonist 2
M0_MCSF	Down	Cisd1	52637	CDGSH iron sulfur domain 1
M0_MCSF	Down	Ltb4r1	16995	leukotriene B4 receptor 1
M0_MCSF	Down	Cela1	109901	chymotrypsin-like elastase family, member 1
M0_MCSF	Down	Dlg3	53310	discs large MAGUK scaffold protein 3
M0_MCSF	Down	Cacng8	81905	calcium channel, voltage-dependent, gamma subunit 8
M0_MCSF	Down	Rgs7bp	52882	regulator of G-protein signalling 7 binding protein
M0_MCSF	Down	Gm15819	NA	NA
M0_MCSF	Down	Apol9b	71898	apolipoprotein L 9b
M0_MCSF	Down	Nle1	217011	notchless homolog 1
M0_MCSF	Down	Gm14461	329436	predicted gene 14461
M0_MCSF	Down	Gm15156	NA	NA
M0_MCSF	Down	Smarca5-ps	545700	SWI/SNF related, matrix associated, actin depenent ragulator of chromatin, subfamily a, member 5, pseudogene
M0_MCSF	Down	Gm12778	108167496	60S ribosomal protein L35a pseudogene
M0_MCSF	Down	Antxr1	69538	anthrax toxin receptor 1
M0_MCSF	Down	1700028E10Rik	625175	RIKEN cDNA 1700028E10 gene
M0_MCSF	Down	D930030I03Rik	320544	RIKEN cDNA D930030I03 gene
M0_MCSF	Down	Gm11273	100040340	cytochrome c oxidase, subunit Vb pseudogene
M0_MCSF	Down	Sfxn1	14057	sideroflexin 1
M0_MCSF	Down	Gm5218	383080	predicted gene 5218
M0_MCSF	Down	RP23-194H4.3	NA	NA
M0_MCSF	Down	Gm11189	623205	TAF13 RNA polymerase II, TATA box binding protein (TBP)-associated factor pseudogene
M0_MCSF	Down	Gm5187	382635	predicted gene 5187
M0_MCSF	Down	Gm11496	100039051	predicted gene 11496
M0_MCSF	Down	Mgll	23945	monoglyceride lipase
M0_MCSF	Down	Gm22579	NA	NA
M0_MCSF	Down	Gm24539	NA	NA
M0_MCSF	Down	Gm16184	100416336	ribosomal protein L14 pseudogene
M0_MCSF	Down	Gys1	14936	glycogen synthase 1, muscle
M0_MCSF	Down	Rps24-ps3	629116	ribosomal protein S24, pseudogene 3
M0_MCSF	Down	Vmp1	75909	vacuole membrane protein 1
M0_MCSF	Down	Fdps	110196	farnesyl diphosphate synthetase
M0_MCSF	Down	Fgfr1	14182	fibroblast growth factor receptor 1
M0_MCSF	Down	Ddr1	12305	discoidin domain receptor family, member 1
M0_MCSF	Down	Amd2	100041585	S-adenosylmethionine decarboxylase 2
M0_MCSF	Down	RP24-92F8.4	NA	NA
M0_MCSF	Down	Aicda	11628	activation-induced cytidine deaminase
M0_MCSF	Down	Ibtk	108837	inhibitor of Bruton agammaglobulinemia tyrosine kinase
M0_MCSF	Down	Gm26003	NA	NA
M0_MCSF	Down	Cxcl2	20310	chemokine (C-X-C motif) ligand 2
M0_MCSF	Down	Gm12031	105243878	predicted gene 12031
M0_MCSF	Down	Dnase1	13419	deoxyribonuclease I
M0_MCSF	Down	Gm11469	383773	peptidyl-prolyl cis-trans isomerase A pseudogene 2_2197.1
M0_MCSF	Down	Gm15294	666488	glyceraldehyde-3-phosphate dehydrogenase pseudogene
M0_MCSF	Down	Itgb1bp2	26549	integrin beta 1 binding protein 2
M0_MCSF	Down	Stap2	106766	signal transducing adaptor family member 2
M0_MCSF	Down	Hacd1	30963	3-hydroxyacyl-CoA dehydratase 1
M0_MCSF	Down	Tpi-rs11	111223	triosephosphate isomerase related sequence 11
M0_MCSF	Down	RP24-243J4.5	NA	NA
M0_MCSF	Down	Gm14636	100503338	predicted gene 14636
M0_MCSF	Down	Lmo4	16911	LIM domain only 4
M0_MCSF	Down	Ndufaf4	68493	NADH:ubiquinone oxidoreductase complex assembly factor 4
M0_MCSF	Down	Adam4	11498	a disintegrin and metallopeptidase domain 4
M0_MCSF	Down	Layn	244864	layilin
M0_MCSF	Down	Gm14399	100043761	predicted gene 14399
M0_MCSF	Down	Gm6204	621155	ribosomal protein S14 pseudogene
M0_MCSF	Down	Gm37025	NA	NA
M0_MCSF	Down	Gm44017	NA	NA
M0_MCSF	Down	Hopx	74318	HOP homeobox
M0_MCSF	Down	Gm9211	668507	glyceraldehyde-3-phosphate dehydrogenase pseudogene
M0_MCSF	Down	Top1mt	72960	DNA topoisomerase 1, mitochondrial
M0_MCSF	Down	Amigo2	105827	adhesion molecule with Ig like domain 2
M0_MCSF	Down	Gm8738	667631	predicted gene 8738
M0_MCSF	Down	Gm44509	NA	NA
M0_MCSF	Down	Myo19	66196	myosin XIX
M0_MCSF	Down	B3galt5	93961	UDP-Gal:betaGlcNAc beta 1,3-galactosyltransferase, polypeptide 5
M0_MCSF	Down	RP23-217F11.1	NA	NA
M0_MCSF	Down	Lrp3	435965	low density lipoprotein receptor-related protein 3
M0_MCSF	Down	Dio2	13371	deiodinase, iodothyronine, type II
M0_MCSF	Down	Ngb	64242	neuroglobin
M0_MCSF	Down	Tdo2	56720	tryptophan 2,3-dioxygenase
M0_MCSF	Down	Tcaf2	232748	TRPM8 channel-associated factor 2
M0_MCSF	Down	Fgfr3	14184	fibroblast growth factor receptor 3
M0_MCSF	Down	Emcn	59308	endomucin
M0_MCSF	Down	Gm26888	NA	NA
M0_MCSF	Down	Gm37914	NA	NA
M0_MCSF	Down	Cpm	70574	carboxypeptidase M
M0_MCSF	Down	Gm9790	100042265	predicted gene 9790
M0_MCSF	Down	Hilpda	69573	hypoxia inducible lipid droplet associated
M0_MCSF	Down	Gm14418	668066	novel KRAB box and zinc finger, C2H2 type domain containing protein
M0_MCSF	Down	Gipc2	54120	GIPC PDZ domain containing family, member 2
M0_MCSF	Down	2210008F06Rik	70057	RIKEN cDNA 2210008F06 gene
M0_MCSF	Down	Rai14	75646	retinoic acid induced 14
M0_MCSF	Down	4930500F10Rik	102636338	RIKEN cDNA 4930500F10 gene
M0_MCSF	Down	Gm27529	NA	NA
M0_MCSF	Down	Gm27288	NA	NA
M0_MCSF	Down	Gm27907	NA	NA
M0_MCSF	Down	Gm27597	NA	NA
M0_MCSF	Down	Aldh1b1	72535	aldehyde dehydrogenase 1 family, member B1
M0_MCSF	Down	Gm16177	102636756	predicted gene 16177
M0_MCSF	Down	Gm2287	100039521	predicted gene 2287
M0_MCSF	Down	Gm13552	100038999	mitochondrial ribosomal protein S18B pseudogene
M0_MCSF	Down	Gm21631	100862302	predicted gene, 21631
M0_MCSF	Down	Cyp7b1	13123	cytochrome P450, family 7, subfamily b, polypeptide 1
M0_MCSF	Down	Wdr63	242253	WD repeat domain 63
M0_MCSF	Down	1700034H15Rik	98736	RIKEN cDNA 1700034H15 gene
M0_MCSF	Down	C130012C08Rik	NA	NA
M0_MCSF	Down	Tmem236	625286	transmembrane protein 236
M0_MCSF	Down	Gm6044	595140	peptidylprolyl isomerase A pseudogene 22
M0_MCSF	Down	Gm43489	NA	NA
M0_MCSF	Down	Malt1	240354	MALT1 paracaspase
M0_MCSF	Down	Gm19566	100503127	60S ribosomal protein L15-like
M0_MCSF	Down	Arap2	212285	ArfGAP with RhoGAP domain, ankyrin repeat and PH domain 2
M0_MCSF	Down	Gm42786	NA	NA
M0_MCSF	Down	Gm27390	NA	NA
M0_MCSF	Down	Gemin4	276919	gem nuclear organelle associated protein 4
M0_MCSF	Down	Ifrd1	15982	interferon-related developmental regulator 1
M0_MCSF	Down	Tgm2	21817	transglutaminase 2, C polypeptide
M0_MCSF	Down	Eif4ebp3	108112	eukaryotic translation initiation factor 4E binding protein 3
M0_MCSF	Down	Maob	109731	monoamine oxidase B
M0_MCSF	Down	Gm5422	432448	proteasome (prosome, macropain) 26S subunit, non-ATPase, 2 pseudogene
M0_MCSF	Down	Clec4b1	69810	C-type lectin domain family 4, member b1
M0_MCSF	Down	St8sia6	241230	ST8 alpha-N-acetyl-neuraminide alpha-2,8-sialyltransferase 6
M0_MCSF	Down	C1ra	50909	complement component 1, r subcomponent A
M0_MCSF	Down	C430049E01Rik	NA	NA
M0_MCSF	Down	Cdh24	239096	cadherin-like 24
M0_MCSF	Down	Galnt9	231605	polypeptide N-acetylgalactosaminyltransferase 9
M0_MCSF	Down	Tst	22117	thiosulfate sulfurtransferase, mitochondrial
M0_MCSF	Down	Olfm1	56177	olfactomedin 1
M0_MCSF	Down	Rgs1	50778	regulator of G-protein signaling 1
M0_MCSF	Down	Fat3	270120	FAT atypical cadherin 3
M0_MCSF	Down	Serpinb10|1	NA	NA
M0_MCSF	Down	Gm5272	383818	glyceraldehyde-3-phosphate dehydrogenase pseudogene
M0_MCSF	Down	Pdxk-ps	435518	pyridoxal (pyridoxine, vitamin B6) kinase, pseudogene
M0_MCSF	Down	Ptges3l	73635	prostaglandin E synthase 3 like
M0_MCSF	Down	Jdp2	81703	Jun dimerization protein 2
M0_MCSF	Down	Rpl21-ps8	637748	ribosomal protein L21, pseudogene 8
M0_MCSF	Down	Gm6415	NA	NA
M0_MCSF	Down	Pkd1l2	76645	polycystic kidney disease 1 like 2
M0_MCSF	Down	Gm27997	NA	NA
M0_MCSF	Down	Enthd1	383075	ENTH domain containing 1
M0_MCSF	Down	Gm16365	NA	NA
M0_MCSF	Down	Gm10355	100043490	RAN guanine nucleotide release factor pseudogene
M0_MCSF	Down	2010103J01Rik	69889	RIKEN cDNA 2010103J01 gene
M0_MCSF	Down	Lyrm7	75530	LYR motif containing 7
M0_MCSF	Down	Col3a1	12825	collagen, type III, alpha 1
M0_MCSF	Down	Bmx	12169	BMX non-receptor tyrosine kinase
M0_MCSF	Down	Hrc	15464	histidine rich calcium binding protein
M0_MCSF	Down	Gm37567	NA	NA
M0_MCSF	Down	Gm37485	NA	NA
M0_MCSF	Down	Gm10012	100043160	cytochrome c oxidase, subunit VIIc pseudogene
M0_MCSF	Down	Gm43661	NA	NA
M0_MCSF	Down	Itgb3	16416	integrin beta 3
M0_MCSF	Down	Nsg1	18196	neuron specific gene family member 1
M0_MCSF	Down	Prmt7	214572	protein arginine N-methyltransferase 7
M0_MCSF	Down	Slc9a3r2	65962	solute carrier family 9 (sodium/hydrogen exchanger), member 3 regulator 2
M0_MCSF	Down	Gm7634	665434	predicted gene 7634
M0_MCSF	Down	Unc13a	382018	unc-13 homolog A
M0_MCSF	Down	Cideb	12684	cell death-inducing DNA fragmentation factor, alpha subunit-like effector B
M0_MCSF	Down	Cd9	12527	CD9 antigen
M0_MCSF	Down	Asprv1	67855	aspartic peptidase, retroviral-like 1
M0_MCSF	Down	Gm7774	665760	predicted gene 7774
M0_MCSF	Down	Slc25a33	70556	solute carrier family 25, member 33
M0_MCSF	Down	Tubb2b	73710	tubulin, beta 2B class IIB
M0_MCSF	Down	Gm4217	100043084	glyceraldehyde-3-phosphate dehydrogenase pseudogene
M0_MCSF	Down	Ldha-ps2	16830	lactate dehydrogenase A, pseudogene 2
M0_MCSF	Down	Glipr2	384009	GLI pathogenesis-related 2
M0_MCSF	Down	Strip2	320609	striatin interacting protein 2
M0_MCSF	Down	Peak1os	102633516	pseudopodium-enriched atypical kinase 1, opposite strand
M0_MCSF	Down	RP23-434L22.2	NA	NA
M0_MCSF	Down	Oscar	232790	osteoclast associated receptor
M0_MCSF	Down	Map6	17760	microtubule-associated protein 6
M0_MCSF	Down	Gm18190	100416683	zinc finger protein 772 pseudogene
M0_MCSF	Down	Eef1e1	66143	eukaryotic translation elongation factor 1 epsilon 1
M0_MCSF	Down	Cd320	54219	CD320 antigen
M0_MCSF	Down	Hoxa10	15395	homeobox A10
M0_MCSF	Down	Gm14138	545640	40S ribosomal protein S6 (Phosphoprotein NP33)
M0_MCSF	Down	Fer1l6	631797	fer-1-like 6 (C. elegans)
M0_MCSF	Down	Prelid2	77619	PRELI domain containing 2
M0_MCSF	Down	1810011H11Rik	NA	NA
M0_MCSF	Down	Ppp1r3b	244416	protein phosphatase 1, regulatory subunit 3B
M0_MCSF	Down	Hdhd3	72748	haloacid dehalogenase-like hydrolase domain containing 3
M0_MCSF	Down	Bckdhb	12040	branched chain ketoacid dehydrogenase E1, beta polypeptide
M0_MCSF	Down	Tmc7	209760	transmembrane channel-like gene family 7
M0_MCSF	Down	Gm2115	100039239	predicted gene 2115
M0_MCSF	Down	5430434F05Rik	78095	RIKEN cDNA 5430434F05 gene
M0_MCSF	Down	Sdpr	NA	NA
M0_MCSF	Down	Cd8b1	12526	CD8 antigen, beta chain 1
M0_MCSF	Down	Trim9	94090	tripartite motif-containing 9
M0_MCSF	Down	Jph3	57340	junctophilin 3
M0_MCSF	Down	Pcdhb17	93888	protocadherin beta 17
M0_MCSF	Down	Gm7061	631331	proteasome subunit beta type-1-like
M0_MCSF	Down	Gm26853	101056057	predicted gene, 26853
M0_MCSF	Down	Mfap3l	71306	microfibrillar-associated protein 3-like
M0_MCSF	Down	Gm12840	NA	NA
M0_MCSF	Down	Spp1	20750	secreted phosphoprotein 1
M0_MCSF	Down	Olfml2b	320078	olfactomedin-like 2B
M0_MCSF	Down	Padi4	18602	peptidyl arginine deiminase, type IV
M0_MCSF	Down	Gm13054	NA	NA
M0_MCSF	Down	Gm13194	381346	predicted gene 13194
M0_MCSF	Down	Gm16585	100416220	ribosomal protein S8 pseudogene
M0_MCSF	Down	Gm45138	NA	NA
M0_MCSF	Down	Ccnd1	12443	cyclin D1
M0_MCSF	Down	Grhpr	76238	glyoxylate reductase/hydroxypyruvate reductase
M0_MCSF	Down	Fth-ps2	14321	ferritin heavy chain, pseudogene 2
M0_MCSF	Down	Txnrd1	50493	thioredoxin reductase 1
M0_MCSF	Down	Gm16201	100503791	predicted gene 16201
M0_MCSF	Down	Pcdhgb5	93702	protocadherin gamma subfamily B, 5
M0_MCSF	Down	Cpa3	12873	carboxypeptidase A3, mast cell
M0_MCSF	Down	Gm5528	433319	predicted gene 5528
M0_MCSF	Down	Hapln4	330790	hyaluronan and proteoglycan link protein 4
M0_MCSF	Down	Clip3	76686	CAP-GLY domain containing linker protein 3
M0_MCSF	Down	Gm15549	100416244	ribosomal protein 10 pseudogene
M0_MCSF	Down	Cdh2	12558	cadherin 2
M0_MCSF	Down	Gm26785	NA	NA
M0_MCSF	Down	B230303O12Rik	319739	RIKEN cDNA B230303O12 gene
M0_MCSF	Down	Rpp40	208366	ribonuclease P 40 subunit
M0_MCSF	Down	St7	64213	suppression of tumorigenicity 7
M0_MCSF	Down	Gm21857	NA	NA
M0_MCSF	Down	Arl4d	80981	ADP-ribosylation factor-like 4D
M0_MCSF	Down	Eno1b	433182	enolase 1B, retrotransposed
M0_MCSF	Down	Gm10232	100040029	predicted pseudogene 10232
M0_MCSF	Down	Mtfp1	67900	mitochondrial fission process 1
M0_MCSF	Down	Fam169b	434197	family with sequence similarity 169, member B
M0_MCSF	Down	Acot6	217700	acyl-CoA thioesterase 6
M0_MCSF	Down	Prr36	73072	proline rich 36
M0_MCSF	Down	Gm7293	640374	glyceraldehyde-3-phosphate dehydrogenase pseudogene
M0_MCSF	Down	Gm18782	100417720	karyopherin alpha 7 (importin alpha 8) pseudogene
M0_MCSF	Down	AA414768	245350	expressed sequence AA414768
M0_MCSF	Down	Gm6180	620772	cofilin 1, non-muscle pseudogene
M0_MCSF	Down	Gm3809	100042375	glyceraldehyde-3-phosphate dehydrogenase pseudogene
M0_MCSF	Down	Ccl8	20307	chemokine (C-C motif) ligand 8
M0_MCSF	Down	Fam136a	66488	family with sequence similarity 136, member A
M0_MCSF	Down	Ears2	67417	glutamyl-tRNA synthetase 2, mitochondrial
M0_MCSF	Down	Socs1	12703	suppressor of cytokine signaling 1
M0_MCSF	Down	RP24-323I19.1	NA	NA
M0_MCSF	Down	Gm44876	NA	NA
M0_MCSF	Down	Gm15753	624083	predicted gene 15753
M0_MCSF	Down	Gbe1	74185	glucan (1,4-alpha-), branching enzyme 1
M0_MCSF	Down	Gm42793	NA	NA
M0_MCSF	Down	Zswim7	69747	zinc finger SWIM-type containing 7
M0_MCSF	Down	Smyd5	232187	SET and MYND domain containing 5
M0_MCSF	Down	Gm4035	100042794	predicted gene 4035
M0_MCSF	Down	Gm12403	102637678	predicted gene 12403
M0_MCSF	Down	1700003N22Rik	NA	NA
M0_MCSF	Down	Bnip3	12176	BCL2/adenovirus E1B interacting protein 3
M0_MCSF	Down	A430057M04Rik	319486	RIKEN cDNA A430057M04 gene
M0_MCSF	Down	Ankrd55	77318	ankyrin repeat domain 55
M0_MCSF	Down	Dkc1	245474	dyskeratosis congenita 1, dyskerin
M0_MCSF	Down	Lipo2	101055671	lipase, member O2
M0_MCSF	Down	Gm45084	NA	NA
M0_MCSF	Down	Gm44982	NA	NA
M0_MCSF	Down	Hsd11b1	15483	hydroxysteroid 11-beta dehydrogenase 1
M0_MCSF	Down	Lrrc63	70859	leucine rich repeat containing 63
M0_MCSF	Down	Idh3a	67834	isocitrate dehydrogenase 3 (NAD+) alpha
M0_MCSF	Down	Gm12758	100126229	predicted gene 12758
M0_MCSF	Down	Tmem202	73893	transmembrane protein 202
M0_MCSF	Down	Hspa1b	15511	heat shock protein 1B
M0_MCSF	Down	Bmp8b	12164	bone morphogenetic protein 8b
M0_MCSF	Down	Pde6a	225600	phosphodiesterase 6A, cGMP-specific, rod, alpha
M0_MCSF	Down	Npr1	18160	natriuretic peptide receptor 1
M0_MCSF	Down	Alpk3	116904	alpha-kinase 3
M0_MCSF	Down	Hipk4	233020	homeodomain interacting protein kinase 4
M0_MCSF	Down	Pcdhb16	93887	protocadherin beta 16
M0_MCSF	Down	Nnat	18111	neuronatin
M0_MCSF	Down	Gm37800	NA	NA
M0_MCSF	Down	Gm43890	NA	NA
M0_MCSF	Down	Clmn	94040	calmin
M0_MCSF	Down	Nr2f2	11819	nuclear receptor subfamily 2, group F, member 2
M0_MCSF	Down	Acacb	100705	acetyl-Coenzyme A carboxylase beta
M0_MCSF	Down	A530099J19Rik	NA	NA
M0_MCSF	Down	Gm15395	102633692	predicted gene 15395
M0_MCSF	Down	Rpl31-ps15	626367	ribosomal protein L31, pseudogene 15
M0_MCSF	Down	Gm26801	NA	NA
M0_MCSF	Down	Gm37086	NA	NA
M0_MCSF	Down	Gm29739	101055891	predicted gene, 29739
M0_MCSF	Down	Gm42860	NA	NA
M0_MCSF	Down	D7Bwg0826e	52819	DNA segment, Chr 7, Brigham & Women's Genetics 0826 expressed
M0_MCSF	Down	Fndc8	78919	fibronectin type III domain containing 8
M0_MCSF	Down	Slc27a6	225579	solute carrier family 27 (fatty acid transporter), member 6
M0_MCSF	Down	Gcgr	14527	glucagon receptor
M0_MCSF	Down	Car14	23831	carbonic anhydrase 14
M0_MCSF	Down	Rhou	69581	ras homolog family member U
M0_MCSF	Down	Prps1	19139	phosphoribosyl pyrophosphate synthetase 1
M0_MCSF	Down	Gm13333	667493	NSA2 ribosome biogenesis homolog pseudogene
M0_MCSF	Down	Ighv1-58	780939	immunoglobulin heavy variable 1-58
M0_MCSF	Down	Nxn	18230	nucleoredoxin
M0_MCSF	Down	Gm12542	100038512	predicted gene 12542
M0_MCSF	Down	Tsg101-ps	22089	tumor susceptibility gene 101, pseudogene
M0_MCSF	Down	Atic	108147	5-aminoimidazole-4-carboxamide ribonucleotide formyltransferase/IMP cyclohydrolase
M0_MCSF	Down	Gm16148	100416325	ribosomal protein S2 pseudogene
M0_MCSF	Down	A930016O22Rik	100503495	RIKEN cDNA A930016O22 gene
M0_MCSF	Down	Hmox1	15368	heme oxygenase 1
M0_MCSF	Down	Spink2	69982	serine peptidase inhibitor, Kazal type 2
M0_MCSF	Down	Gm12537	100041342	glyceraldehyde-3-phosphate dehydrogenase pseudogene
M0_MCSF	Down	Celsr3	107934	cadherin, EGF LAG seven-pass G-type receptor 3
M0_MCSF	Down	Gm3222	100041236	glyceraldehyde-3-phosphate dehydrogenase pseudogene
M0_MCSF	Down	Gm14046	545463	peptidylprolyl isomerase A (Ppia) pseudogene 2_1620.1
M0_MCSF	Down	Magix	54634	MAGI family member, X-linked
M0_MCSF	Down	Serping1	12258	serine (or cysteine) peptidase inhibitor, clade G, member 1
M0_MCSF	Down	Ap1s3	252903	adaptor-related protein complex AP-1, sigma 3
M0_MCSF	Down	Gm43214	NA	NA
M0_MCSF	Down	Gm16096	102639005	predicted gene 16096
M0_MCSF	Down	Gm5787	544878	glyceraldehyde-3-phosphate dehydrogenase pseudogene
M0_MCSF	Down	Snhg9	73474	small nucleolar RNA host gene 9
M0_MCSF	Down	Gm28512	NA	NA
M0_MCSF	Down	Rps15a-ps6	100042173	ribosomal protein S15A, pseudogene 6
M0_MCSF	Down	A230083N12Rik	100125340	RIKEN cDNA A230083N12 gene
M0_MCSF	Down	Rab37	58222	RAB37, member RAS oncogene family
M0_MCSF	Down	Ston2	108800	stonin 2
M0_MCSF	Down	Angptl2	26360	angiopoietin-like 2
M0_MCSF	Down	Gm12969	667354	glyceraldehyde-3-phosphate dehydrogenase pseudogene
M0_MCSF	Down	Gm42845	NA	NA
M0_MCSF	Down	Pcdhgb2	93700	protocadherin gamma subfamily B, 2
M0_MCSF	Down	Gnat3	242851	guanine nucleotide binding protein, alpha transducing 3
M0_MCSF	Down	Anpep	16790	alanyl (membrane) aminopeptidase
M0_MCSF	Down	Rgsl1	240816	regulator of G-protein signaling like 1
M0_MCSF	Down	Gm11557	665922	glyceraldehyde-3-phosphate dehydrogenase pseudogene
M0_MCSF	Down	Gm28626	102635143	predicted gene 28626
M0_MCSF	Down	Gm43637	NA	NA
M0_MCSF	Down	Rai2	24004	retinoic acid induced 2
M0_MCSF	Down	BC026762	236428	cDNA sequence BC026762
M0_MCSF	Down	Ceacam10	26366	carcinoembryonic antigen-related cell adhesion molecule 10
M0_MCSF	Down	F5	14067	coagulation factor V
M0_MCSF	Down	Ccdc38	237465	coiled-coil domain containing 38
M0_MCSF	Down	Shcbp1l	71836	Shc SH2-domain binding protein 1-like
M0_MCSF	Down	Rnu73b	19871	U73B small nuclear RNA
M0_MCSF	Down	Klk1b11	16613	kallikrein 1-related peptidase b11
M0_MCSF	Down	Gata3	14462	GATA binding protein 3
M0_MCSF	Down	Fst	14313	follistatin
M0_MCSF	Down	Gm17068	100158259	glyceraldehyde-3-phosphate dehydrogenase pseudogene
M0_MCSF	Down	Gm8757	102636784	histone H3.3-like
M0_MCSF	Down	Il7	16196	interleukin 7
M0_MCSF	Down	Gm15796	105244733	predicted gene 15796
M0_MCSF	Down	Bhlha9	320522	basic helix-loop-helix family, member a9
M0_MCSF	Down	Gm26734	NA	NA
M0_MCSF	Down	Gm26841	NA	NA
M0_MCSF	Down	Pcdh19	279653	protocadherin 19
M0_MCSF	Down	Gm38166	NA	NA
M0_MCSF	Down	Sdc1	20969	syndecan 1
M0_MCSF	Down	Slc22a4	30805	solute carrier family 22 (organic cation transporter), member 4
M0_MCSF	Down	Zbtb32	58206	zinc finger and BTB domain containing 32
M0_MCSF	Down	Glrx	93692	glutaredoxin
M0_MCSF	Down	Cxcr5	12145	chemokine (C-X-C motif) receptor 5
M0_MCSF	Down	Bcl2l1	12048	BCL2-like 1
M0_MCSF	Down	Gm10053	672195	cytochrome c, somatic pseudogene
M0_MCSF	Down	Gm8100	666430	glyceraldehyde-3-phosphate dehydrogenase pseudogene
M0_MCSF	Down	Gbp10	626578	guanylate-binding protein 10
M0_MCSF	Down	Fcor	100503924	Foxo1 corepressor
M0_MCSF	Down	Gm8580	667338	ribosomal protein L29 pseudogene
M0_MCSF	Down	Gm38387	NA	NA
M0_MCSF	Down	Dph6	66632	diphthamine biosynthesis 6
M0_MCSF	Down	Rpl10-ps1	100043391	ribosomal protein L10, pseudogene 1
M0_MCSF	Down	Gm29257	102636216	predicted gene 29257
M0_MCSF	Down	4933431K14Rik	71295	RIKEN cDNA 4933431K14 gene
M0_MCSF	Down	Pgam1	18648	phosphoglycerate mutase 1
M0_MCSF	Down	Gm14111	668918	glyceraldehyde-3-phosphate dehydrogenase pseudogene
M0_MCSF	Down	Slc25a13	50799	solute carrier family 25 (mitochondrial carrier, adenine nucleotide translocator), member 13
M0_MCSF	Down	Plvap	84094	plasmalemma vesicle associated protein
M0_MCSF	Down	Gm43800	NA	NA
M0_MCSF	Down	Gm42585	NA	NA
M0_MCSF	Down	Gm6263	621824	integrin linked kinase pseudogene
M0_MCSF	Down	Rpl5-ps1	665407	ribosomal protein L5, pseudogene 1
M0_MCSF	Down	Ptgir	19222	prostaglandin I receptor (IP)
M0_MCSF	Down	2810030D12Rik	78335	RIKEN cDNA 2810030D12 gene
M0_MCSF	Down	Alas1	11655	aminolevulinic acid synthase 1
M0_MCSF	Down	Fads2	56473	fatty acid desaturase 2
M0_MCSF	Down	Fabp4	11770	fatty acid binding protein 4, adipocyte
M0_MCSF	Down	Trmt112-ps2	627985	tRNA methyltransferase 11-2, pseudogene 2
M0_MCSF	Down	Rpl34-ps1	619547	ribosomal protein L34, pseudogene 1
M0_MCSF	Down	Gm4405	100043386	glyceraldehyde-3-phosphate dehydrogenase pseudogene
M0_MCSF	Down	Hddc2	69692	HD domain containing 2
M0_MCSF	Down	Zfp507	668501	zinc finger protein 507
M0_MCSF	Down	Faddos	100038412	Fas (TNFRSF6)-associated via death domain, opposite strand
M0_MCSF	Down	Gm21399	100862012	peroxiredoxin pseudogene 2
M0_MCSF	Down	AI606473	99686	expressed sequence AI606473
M0_MCSF	Down	Kcnip3	56461	Kv channel interacting protein 3, calsenilin
M0_MCSF	Down	Plk2	20620	polo like kinase 2
M0_MCSF	Down	Il1r1	16177	interleukin 1 receptor, type I
M0_MCSF	Down	Slc16a1	20501	solute carrier family 16 (monocarboxylic acid transporters), member 1
M0_MCSF	Down	Gm2445	100039827	glyceraldehyde-3-phosphate dehydrogenase pseudogene
M0_MCSF	Down	Hspa1a	193740	heat shock protein 1A
M0_MCSF	Down	Gm8250	666712	predicted gene 8250
M0_MCSF	Down	Glt8d2	74782	glycosyltransferase 8 domain containing 2
M0_MCSF	Down	Dusp9	75590	dual specificity phosphatase 9
M0_MCSF	Down	Plcb1	18795	phospholipase C, beta 1
M0_MCSF	Down	Kdm4d	244694	lysine (K)-specific demethylase 4D
M0_MCSF	Down	Tgfb1i1|2	NA	NA
M0_MCSF	Down	Adam21	56622	a disintegrin and metallopeptidase domain 21
M0_MCSF	Down	1700061G19Rik	78625	RIKEN cDNA 1700061G19 gene
M0_MCSF	Down	Rnf225	381845	ring finger protein 225
M0_MCSF	Down	Col10a1	12813	collagen, type X, alpha 1
M0_MCSF	Down	Zfp879	214779	zinc finger protein 879
M0_MCSF	Down	Proser2	227545	proline and serine rich 2
M0_MCSF	Down	Gm26863	NA	NA
M0_MCSF	Down	Gm43712	NA	NA
M0_MCSF	Down	Lox	16948	lysyl oxidase
M0_MCSF	Down	Gm5803	NA	NA
M0_MCSF	Down	Col4a5	12830	collagen, type IV, alpha 5
M0_MCSF	Down	Mthfd1l	270685	methylenetetrahydrofolate dehydrogenase (NADP+ dependent) 1-like
M0_MCSF	Down	Gm21839	NA	NA
M0_MCSF	Down	Rpl32-ps	19952	ribosomal protein L32, pseudogene
M0_MCSF	Down	Gm26525	NA	NA
M0_MCSF	Down	Gm44335	NA	NA
M0_MCSF	Down	Grwd1	101612	glutamate-rich WD repeat containing 1
M0_MCSF	Down	Ly6g6d	114654	lymphocyte antigen 6 complex, locus G6D
M0_MCSF	Down	Cxadr	13052	coxsackie virus and adenovirus receptor
M0_MCSF	Down	Mir6990	102466213	microRNA 6990
M0_MCSF	Down	Gm26407	NA	NA
M0_MCSF	Down	Slc1a4	55963	solute carrier family 1 (glutamate/neutral amino acid transporter), member 4
M0_MCSF	Down	Ccr9	12769	chemokine (C-C motif) receptor 9
M0_MCSF	Down	Gm14435	100302432	KRAB box containing protein
M0_MCSF	Down	Best1	24115	bestrophin 1
M0_MCSF	Down	Ntn1	18208	netrin 1
M0_MCSF	Down	Dapk2	13143	death-associated protein kinase 2
M0_MCSF	Down	Smco1	69576	single-pass membrane protein with coiled-coil domains 1
M0_MCSF	Down	Gm4891	234501	glyceraldehyde-3-phosphate dehydrogenase pseudogene
M0_MCSF	Down	Hmcn2	665700	hemicentin 2
M0_MCSF	Down	Jag1	16449	jagged 1
M0_MCSF	Down	A930007I19Rik	77779	RIKEN cDNA A930007I19 gene
M0_MCSF	Down	Wdr54	75659	WD repeat domain 54
M0_MCSF	Down	Lrrk2	66725	leucine-rich repeat kinase 2
M0_MCSF	Down	Tacstd2	56753	tumor-associated calcium signal transducer 2
M0_MCSF	Down	Gm20541	102637111	predicted gene 20541
M0_MCSF	Down	Pnp2	667034	purine-nucleoside phosphorylase 2
M0_MCSF	Down	Itpr3	16440	inositol 1,4,5-triphosphate receptor 3
M0_MCSF	Down	C230062I16Rik	625421	RIKEN cDNA C230062I16 gene
M0_MCSF	Down	Pcdhga6	93714	protocadherin gamma subfamily A, 6
M0_MCSF	Down	Id2	15902	inhibitor of DNA binding 2
M0_MCSF	Down	Gm26594	NA	NA
M0_MCSF	Down	Ceacam19	319930	carcinoembryonic antigen-related cell adhesion molecule 19
M0_MCSF	Down	Gm44132	NA	NA
M0_MCSF	Down	Gm38188	NA	NA
M0_MCSF	Down	Gm11821	634834	predicted gene 11821
M0_MCSF	Down	St3gal5	20454	ST3 beta-galactoside alpha-2,3-sialyltransferase 5
M0_MCSF	Down	AL672049.1	NA	NA
M0_MCSF	Down	Mpzl3	319742	myelin protein zero-like 3
M0_MCSF	Down	Clmp	71566	CXADR-like membrane protein
M0_MCSF	Down	A130006I12Rik	319264	RIKEN cDNA A130006I12 gene
M0_MCSF	Down	Slc35g1	240660	solute carrier family 35, member G1
M0_MCSF	Down	Gm15884	NA	NA
M0_MCSF	Down	Mpp2	50997	membrane protein, palmitoylated 2 (MAGUK p55 subfamily member 2)
M0_MCSF	Down	Efcab12	212516	EF-hand calcium binding domain 12
M0_MCSF	Down	Gm12314	100418186	NADH dehydrogenase (ubiquinone) 1 beta subcomplex 8 pseudogene
M0_MCSF	Down	Gm7118	633606	glyceraldehyde-3-phosphate dehydrogenase pseudogene
M0_MCSF	Down	Cadps	27062	Ca2+-dependent secretion activator
M0_MCSF	Down	Col4a4	12829	collagen, type IV, alpha 4
M0_MCSF	Down	Gm5138	380687	glyceraldehyde-3-phosphate dehydrogenase pseudogene
M0_MCSF	Down	D030025P21Rik	100303738	RIKEN cDNA D030025P21 gene
M0_MCSF	Down	Filip1	70598	filamin A interacting protein 1
M0_MCSF	Down	Snrpert	102632439	small nuclear ribonucleoprotein E, pseudogene
M0_MCSF	Down	Gm15921	108169073	60S ribosomal protein L21 pseudogene
M0_MCSF	Down	Gm27048	NA	NA
M0_MCSF	Down	Gm37639	NA	NA
M0_MCSF	Down	Adgrf3	381628	adhesion G protein-coupled receptor F3
M0_MCSF	Down	Msr1	20288	macrophage scavenger receptor 1
M0_MCSF	Down	Bcam	57278	basal cell adhesion molecule
M0_MCSF	Down	1700092M07Rik	74307	RIKEN cDNA 1700092M07 gene
M0_MCSF	Down	Phlda1	21664	pleckstrin homology like domain, family A, member 1
M0_MCSF	Down	Prtn3	19152	proteinase 3
M0_MCSF	Down	Rnd1	223881	Rho family GTPase 1
M0_MCSF	Down	Nr1h3	22259	nuclear receptor subfamily 1, group H, member 3
M0_MCSF	Down	Plcd1	18799	phospholipase C, delta 1
M0_MCSF	Down	Gm26457|1	NA	NA
M0_MCSF	Down	Arrdc4	66412	arrestin domain containing 4
M0_MCSF	Down	Gm7278	639787	ornithine decarboxylase, structural 1 pseudogene
M0_MCSF	Down	Mthfd2	17768	methylenetetrahydrofolate dehydrogenase (NAD+ dependent), methenyltetrahydrofolate cyclohydrolase
M0_MCSF	Down	A830005F24Rik	442803	RIKEN cDNA A830005F24 gene
M0_MCSF	Down	Pdgfc	54635	platelet-derived growth factor, C polypeptide
M0_MCSF	Down	Susd4	96935	sushi domain containing 4
M0_MCSF	Down	1300002E11Rik	100043489	RIKEN cDNA 1300002E11 gene
M0_MCSF	Down	Gm29036	102640198	predicted gene 29036
M0_MCSF	Down	Tmod1	21916	tropomodulin 1
M0_MCSF	Down	Bex1	19716	brain expressed X-linked 1
M0_MCSF	Down	Cd209a	170786	CD209a antigen
M0_MCSF	Down	Mirt2	100038659	myocardial infraction associated transcript 2
M0_MCSF	Down	Dyx1c1	67685	dyslexia susceptibility 1 candidate 1
M0_MCSF	Down	Gm24888	NA	NA
M0_MCSF	Down	Itpa-ps1	620661	inosine triphosphatase (nucleoside triphosphate pyrophosphatase) pseudogene 1
M0_MCSF	Down	Hectd2	226098	HECT domain E3 ubiquitin protein ligase 2
M0_MCSF	Down	Gm3671	100042107	glyceraldehyde-3-phosphate dehydrogenase pseudogene
M0_MCSF	Down	Mrps28	66230	mitochondrial ribosomal protein S28
M0_MCSF	Down	Gsr	14782	glutathione reductase
M0_MCSF	Down	mt-Ti	NA	NA
M0_MCSF	Down	Plbd1	66857	phospholipase B domain containing 1
M0_MCSF	Down	Gm16407	100040304	syndecan 1 pseudogene
M0_MCSF	Down	Gm10501	100303733	predicted gene 10501
M0_MCSF	Down	Gm6123	620009	pyruvate dehydrogenase (lipoamide) beta pseudogene
M0_MCSF	Down	Lefty1	13590	left right determination factor 1
M0_MCSF	Down	Tmem82	213989	transmembrane protein 82
M0_MCSF	Down	Tet1	52463	tet methylcytosine dioxygenase 1
M0_MCSF	Down	Gm18980	100418068	EGF-like repeats and discoidin I-like domains 3 pseudogene
M0_MCSF	Down	Ldha	16828	lactate dehydrogenase A
M0_MCSF	Down	Mag	17136	myelin-associated glycoprotein
M0_MCSF	Down	Slc6a12	14411	solute carrier family 6 (neurotransmitter transporter, betaine/GABA), member 12
M0_MCSF	Down	Aldoc	11676	aldolase C, fructose-bisphosphate
M0_MCSF	Down	1700084J12Rik	73486	ribosomal protein L7-like 1 pseudogene
M0_MCSF	Down	Plekhh1	211945	pleckstrin homology domain containing, family H (with MyTH4 domain) member 1
M0_MCSF	Down	Akap6	238161	A kinase (PRKA) anchor protein 6
M0_MCSF	Down	Hk2	15277	hexokinase 2
M0_MCSF	Down	Gm14295	100039123	predicted gene 14295
M0_MCSF	Down	Rab11fip4	268451	RAB11 family interacting protein 4 (class II)
M0_MCSF	Down	Dennd2d	72121	DENN/MADD domain containing 2D
M0_MCSF	Down	Gm8731	667619	predicted gene 8731
M0_MCSF	Down	Gm8055	666342	glyceraldehyde-3-phosphate dehydrogenase pseudogene
M0_MCSF	Down	Gm45040	NA	NA
M0_MCSF	Down	Spag8	433700	sperm associated antigen 8
M0_MCSF	Down	Cpne5	240058	copine V
M0_MCSF	Down	Pilrb2	545812	paired immunoglobin-like type 2 receptor beta 2
M0_MCSF	Down	Armcx4	100503043	armadillo repeat containing, X-linked 4
M0_MCSF	Down	Adgrg5	382045	adhesion G protein-coupled receptor G5
M0_MCSF	Down	Sycp2	320558	synaptonemal complex protein 2
M0_MCSF	Down	Gm12589	102631997	predicted gene 12589
M0_MCSF	Down	Pla2g5	18784	phospholipase A2, group V
M0_MCSF	Down	Gm21814	436100	predicted gene, 21814
M0_MCSF	Down	Pcdhgb7	93704	protocadherin gamma subfamily B, 7
M0_MCSF	Down	Dlx1as	111970	distal-less homeobox 1, antisense
M0_MCSF	Down	Bcar3	29815	breast cancer anti-estrogen resistance 3
M0_MCSF	Down	Rcl1	59028	RNA terminal phosphate cyclase-like 1
M0_MCSF	Down	Ctgf	14219	connective tissue growth factor
M0_MCSF	Down	Ttc25	74407	tetratricopeptide repeat domain 25
M0_MCSF	Down	Itgad	381924	integrin, alpha D
M0_MCSF	Down	Tmc3	233424	transmembrane channel-like gene family 3
M0_MCSF	Down	Prrt1	260297	proline-rich transmembrane protein 1
M0_MCSF	Down	Gm4750	207318	actin, beta pseudogene
M0_MCSF	Down	Gm8464	667113	actin, beta pseudogene
M0_MCSF	Down	Gm11534	NA	NA
M0_MCSF	Down	Gm42627	108169102	predicted gene 42627
M0_MCSF	Down	Tex14	83560	testis expressed gene 14
M0_MCSF	Down	Baiap3	545192	BAI1-associated protein 3
M0_MCSF	Down	Gm13392	100504187	predicted gene 13392
M0_MCSF	Down	Cc2d2b	668310	coiled-coil and C2 domain containing 2B
M0_MCSF	Down	Gm807	328320	predicted gene 807
M0_MCSF	Down	Hspe1-ps3	102640385	heat shock protein 1 (chaperonin 10), pseudogene 3
M0_MCSF	Down	Slc9a4	110895	solute carrier family 9 (sodium/hydrogen exchanger), member 4
M0_MCSF	Down	Dll4	54485	delta like canonical Notch ligand 4
M0_MCSF	Down	Zfp37	22696	zinc finger protein 37
M0_MCSF	Down	Tgfb2	21808	transforming growth factor, beta 2
M0_MCSF	Down	Klhl32	212390	kelch-like 32
M0_MCSF	Down	Elfn2	207393	leucine rich repeat and fibronectin type III, extracellular 2
M0_MCSF	Down	Mn1	433938	meningioma 1
M0_MCSF	Down	5730416F02Rik	70550	capping protein (actin filament), gelsolin-like pseudogene
M0_MCSF	Down	Gm15462	108168861	predicted gene 15462
M0_MCSF	Down	Gm43696	NA	NA
M0_MCSF	Down	Dcbld1	66686	discoidin, CUB and LCCL domain containing 1
M0_MCSF	Down	Fscn2	238021	fascin actin-bundling protein 2
M0_MCSF	Down	Dpysl5	65254	dihydropyrimidinase-like 5
M0_MCSF	Down	Wnt5b	22419	wingless-type MMTV integration site family, member 5B
M0_MCSF	Down	Arhgap44	216831	Rho GTPase activating protein 44
M0_MCSF	Down	Islr2	320563	immunoglobulin superfamily containing leucine-rich repeat 2
M0_MCSF	Down	4933427D06Rik	232217	RIKEN cDNA 4933427D06 gene
M0_MCSF	Down	Gm10912	100038697	predicted gene 10912
M0_MCSF	Down	Gm12864	666703	glyceraldehyde-3-phosphate dehydrogenase pseudogene
M0_MCSF	Down	Gm13068	NA	NA
M0_MCSF	Down	Gm15601	NA	NA
M0_MCSF	Down	Gm5590	434168	predicted gene 5590
M0_MCSF	Down	Gm15931	112136069	predicted gene 15931
M0_MCSF	Down	Gm7334	654432	B-cell translocation gene 3 pseudogene
M0_MCSF	Down	Gm4735	103324	putative Eno1 pseudogene
M0_MCSF	Down	Rgs16	19734	regulator of G-protein signaling 16
M0_MCSF	Down	Gm42962	NA	NA
M0_MCSF	Down	Gm9114	668342	glyceraldehyde-3-phosphate dehydrogenase pseudogene
M0_MCSF	Down	2900076A07Rik	100504421	RIKEN cDNA 2900076A07 gene
M0_MCSF	Down	Cldn1	12737	claudin 1
M0_MCSF	Down	Limch1	77569	LIM and calponin homology domains 1
M0_MCSF	Down	RP23-453G12.2	NA	NA
M0_MCSF	Down	4930524O07Rik	406209	RIKEN cDNA 4930524O07 gene
M0_MCSF	Down	B430306N03Rik	320148	RIKEN cDNA B430306N03 gene
M0_MCSF	Down	D630029K05Rik	103175	RIKEN cDNA D630029K05 gene
M0_MCSF	Down	Rgs11	50782	regulator of G-protein signaling 11
M0_MCSF	Down	Azin2	242669	antizyme inhibitor 2
M0_MCSF	Down	Nek6	59126	NIMA (never in mitosis gene a)-related expressed kinase 6
M0_MCSF	Down	Gm16364	100504626	predicted gene 16364
M0_MCSF	Down	4930422M22Rik	73774	RIKEN cDNA 4930422M22 gene
M0_MCSF	Down	Ptk7	71461	PTK7 protein tyrosine kinase 7
M0_MCSF	Down	RP24-225A21.3	NA	NA
M0_MCSF	Down	Gm43909	NA	NA
M0_MCSF	Down	Trmt61a	328162	tRNA methyltransferase 61A
M0_MCSF	Down	Rhoc	11853	ras homolog family member C
M0_MCSF	Down	Gm6736	627189	predicted gene 6736
M0_MCSF	Down	Gm11960	100041006	glyceraldehyde-3-phosphate dehydrogenase pseudogene
M0_MCSF	Down	Igdcc4	56741	immunoglobulin superfamily, DCC subclass, member 4
M0_MCSF	Down	Teddm1b	433365	transmembrane epididymal protein 1B
M0_MCSF	Down	Gm12089	100042990	predicted gene 12089
M0_MCSF	Down	Gpr84	80910	G protein-coupled receptor 84
M0_MCSF	Down	Gm20441	NA	NA
M0_MCSF	Down	Gm7426	664960	embryonic H3 histone
M0_MCSF	Down	Gm43692	NA	NA
M0_MCSF	Down	Rcvrn	19674	recoverin
M0_MCSF	Down	Ly6g	546644	lymphocyte antigen 6 complex, locus G
M0_MCSF	Down	Fsd2	244091	fibronectin type III and SPRY domain containing 2
M0_MCSF	Down	Loxl2	94352	lysyl oxidase-like 2
M0_MCSF	Down	Klc3	232943	kinesin light chain 3
M0_MCSF	Down	Aldh18a1	56454	aldehyde dehydrogenase 18 family, member A1
M0_MCSF	Down	Prg4	96875	proteoglycan 4 (megakaryocyte stimulating factor, articular superficial zone protein)
M0_MCSF	Down	Sox18	20672	SRY (sex determining region Y)-box 18
M0_MCSF	Down	Rspo2	239405	R-spondin 2
M0_MCSF	Down	RP24-348E18.1	NA	NA
M0_MCSF	Down	Cst7	13011	cystatin F (leukocystatin)
M0_MCSF	Down	2010204K13Rik	68355	RIKEN cDNA 2010204K13 gene
M0_MCSF	Down	Wsb2-ps	626482	WD repeat and SOCS box-containing 2, pseudogene
M0_MCSF	Down	Dach1	13134	dachshund family transcription factor 1
M0_MCSF	Down	Pcdh7	54216	protocadherin 7
M0_MCSF	Down	Hist1h2bp	319188	histone cluster 1, H2bp
M0_MCSF	Down	Ubash3b	72828	ubiquitin associated and SH3 domain containing, B
M0_MCSF	Down	Gm27861	NA	NA
M0_MCSF	Down	Rab15	104886	RAB15, member RAS oncogene family
M0_MCSF	Down	Gm27995	NA	NA
M0_MCSF	Down	Gfra4	14588	glial cell line derived neurotrophic factor family receptor alpha 4
M0_MCSF	Down	Gm10184	100043906	karyopherin (importin) alpha 2 pseudogene
M0_MCSF	Down	Cd55	13136	CD55 molecule, decay accelerating factor for complement
M0_MCSF	Down	Ywhaq-ps2	664895	tyrosine 3-monooxygenase/tryptophan 5-monooxygenase activation protein theta, pseudogene 2
M0_MCSF	Down	Nr4a3	18124	nuclear receptor subfamily 4, group A, member 3
M0_MCSF	Down	Phgdh	236539	3-phosphoglycerate dehydrogenase
M0_MCSF	Down	Gm13625	NA	NA
M0_MCSF	Down	Klf4	16600	Kruppel-like factor 4 (gut)
M0_MCSF	Down	Gm29094	NA	NA
M0_MCSF	Down	Lhfpl4	269788	lipoma HMGIC fusion partner-like protein 4
M0_MCSF	Down	Cacna1b	12287	calcium channel, voltage-dependent, N type, alpha 1B subunit
M0_MCSF	Down	Akap5	238276	A kinase (PRKA) anchor protein 5
M0_MCSF	Down	Gdap1	14545	ganglioside-induced differentiation-associated-protein 1
M0_MCSF	Down	Sorcs2	81840	sortilin-related VPS10 domain containing receptor 2
M0_MCSF	Down	Qrich2	217341	glutamine rich 2
M0_MCSF	Down	1700112J16Rik	76628	RIKEN cDNA 1700112J16 gene
M0_MCSF	Down	F630040K05Rik	433111	RIKEN cDNA F630040K05 gene
M0_MCSF	Down	Gm27194	NA	NA
M0_MCSF	Down	Gm36955	NA	NA
M0_MCSF	Down	Gm43221	NA	NA
M0_MCSF	Down	Adamts9	101401	a disintegrin-like and metallopeptidase (reprolysin type) with thrombospondin type 1 motif, 9
M0_MCSF	Down	Map1b	17755	microtubule-associated protein 1B
M0_MCSF	Down	RP23-322E23.7	NA	NA
M0_MCSF	Down	Gm15610	101055761	coiled-coil domain-containing protein 72 pseudogene
M0_MCSF	Down	G0s2	14373	G0/G1 switch gene 2
M0_MCSF	Down	Gm16106	NA	NA
M0_MCSF	Down	Magee1	107528	melanoma antigen, family E, 1
M0_MCSF	Down	Pla1a	85031	phospholipase A1 member A
M0_MCSF	Down	Pgam1-ps2	668045	phosphoglycerate mutase 1, pseudogene 2
M0_MCSF	Down	BC021767	545551	cingulin pseudogene
M0_MCSF	Down	Ankrd13b	268445	ankyrin repeat domain 13b
M0_MCSF	Down	Cxcl14	57266	chemokine (C-X-C motif) ligand 14
M0_MCSF	Down	Gm7507	665129	glyceraldehyde-3-phosphate dehydrogenase pseudogene
M0_MCSF	Down	Ccdc148	227933	coiled-coil domain containing 148
M0_MCSF	Down	Radil	231858	Ras association and DIL domains
M0_MCSF	Down	Pgf	18654	placental growth factor
M0_MCSF	Down	Fhdc1	229474	FH2 domain containing 1
M0_MCSF	Down	Gm44851	NA	NA
M0_MCSF	Down	Ly6c2	100041546	lymphocyte antigen 6 complex, locus C2
M0_MCSF	Down	Il2ra	16184	interleukin 2 receptor, alpha chain
M0_MCSF	Down	Map1a	17754	microtubule-associated protein 1 A
M0_MCSF	Down	Bcas1	76960	breast carcinoma amplified sequence 1
M0_MCSF	Down	Gm16276	102635053	predicted gene 16276
M0_MCSF	Down	Gm10076	100126819	ribosomal protein L41 pseudogene
M0_MCSF	Down	Gm20656	NA	NA
M0_MCSF	Down	Dusp6	67603	dual specificity phosphatase 6
M0_MCSF	Down	Gm5073	278181	predicted pseudogene 5073
M0_MCSF	Down	Mif	17319	macrophage migration inhibitory factor (glycosylation-inhibiting factor)
M0_MCSF	Down	Rbpj	19664	recombination signal binding protein for immunoglobulin kappa J region
M0_MCSF	Down	Atf5	107503	activating transcription factor 5
M0_MCSF	Down	Ctf2	244218	cardiotrophin 2
M0_MCSF	Down	Ccdc116	76872	coiled-coil domain containing 116
M0_MCSF	Down	Gm8343	666881	glyceraldehyde-3-phosphate dehydrogenase pseudogene
M0_MCSF	Down	Gm6085	619596	glioma tumor suppressor candidate region gene 2 pseudogene
M0_MCSF	Down	E130218I03Rik	77490	RIKEN cDNA E130218I03 gene
M0_MCSF	Down	Gm44658	NA	NA
M0_MCSF	Down	Lrrc39	109245	leucine rich repeat containing 39
M0_MCSF	Down	Gm9142	668386	glyceraldehyde-3-phosphate dehydrogenase pseudogene
M0_MCSF	Down	Gm42655	NA	NA
M0_MCSF	Down	Mrvi1	17540	MRV integration site 1
M0_MCSF	Down	Lrrc27	76612	leucine rich repeat containing 27
M0_MCSF	Down	Zranb3	226409	zinc finger, RAN-binding domain containing 3
M0_MCSF	Down	Snord22	100127111	small nucleolar RNA, C/D box 22
M0_MCSF	Down	Gm26558	NA	NA
M0_MCSF	Down	Irgc1	210145	immunity-related GTPase family, cinema 1
M0_MCSF	Down	Bach2os	414068	BTB and CNC homology 2, opposite strand
M0_MCSF	Down	Cdca7	66953	cell division cycle associated 7
M0_MCSF	Down	Palm3	74337	paralemmin 3
M0_MCSF	Down	Slc26a9	320718	solute carrier family 26, member 9
M0_MCSF	Down	Gm43878	NA	NA
M0_MCSF	Down	Gm5244	383436	ribosomal protein, large, P1 pseudogene
M0_MCSF	Down	RP23-423B21.1	NA	NA
M0_MCSF	Down	Qpct	70536	glutaminyl-peptide cyclotransferase (glutaminyl cyclase)
M0_MCSF	Down	Gm10109	638411	predicted gene 10109
M0_MCSF	Down	Slc29a2	13340	solute carrier family 29 (nucleoside transporters), member 2
M0_MCSF	Down	Akap7	432442	A kinase (PRKA) anchor protein 7
M0_MCSF	Down	Lat	16797	linker for activation of T cells
M0_MCSF	Down	Gli3	14634	GLI-Kruppel family member GLI3
M0_MCSF	Down	Mir155hg	100653389	Mir155 host gene (non-protein coding)
M0_MCSF	Down	Comtd1	69156	catechol-O-methyltransferase domain containing 1
M0_MCSF	Down	Thrb	21834	thyroid hormone receptor beta
M0_MCSF	Down	RP24-77E13.4	NA	NA
M0_MCSF	Down	Fcna	14133	ficolin A
M0_MCSF	Down	Cyp1b1	13078	cytochrome P450, family 1, subfamily b, polypeptide 1
M0_MCSF	Down	Gm14539	100503459	upregulated during skeletal muscle growth 5 pseudogene
M0_MCSF	Down	Gm6169	620648	proteolipid protein 2 pseudogene
M0_MCSF	Down	Dtnb	13528	dystrobrevin, beta
M0_MCSF	Down	Gm10359	100042349	glyceraldehyde-3-phosphate dehydrogenase pseudogene
M0_MCSF	Down	Mir3082	100526479	microRNA 3082
M0_MCSF	Down	Ndst3	83398	N-deacetylase/N-sulfotransferase (heparan glucosaminyl) 3
M0_MCSF	Down	Gimap3	83408	GTPase, IMAP family member 3
M0_MCSF	Down	Muc6	353328	mucin 6, gastric
M0_MCSF	Down	Ly6c1	17067	lymphocyte antigen 6 complex, locus C1
M0_MCSF	Down	G6pd2	14380	glucose-6-phosphate dehydrogenase 2
M0_MCSF	Down	4932441J04Rik	319216	RIKEN cDNA 4932441J04 gene
M0_MCSF	Down	Atp7b	11979	ATPase, Cu++ transporting, beta polypeptide
M0_MCSF	Down	Map6d1	208158	MAP6 domain containing 1
M0_MCSF	Down	Gm43462	NA	NA
M0_MCSF	Down	Gm44860	NA	NA
M0_MCSF	Down	Col4a2	12827	collagen, type IV, alpha 2
M0_MCSF	Down	Gm44777	NA	NA
M0_MCSF	Down	Rnf183	76072	ring finger protein 183
M0_MCSF	Down	Mcpt8	17231	mast cell protease 8
M0_MCSF	Down	Rufy4	435626	RUN and FYVE domain containing 4
M0_MCSF	Down	Gm5523	433273	glyceraldehyde-3-phosphate dehydrogenase pseudogene
M0_MCSF	Down	Armcx1	78248	armadillo repeat containing, X-linked 1
M0_MCSF	Down	Gm42903	NA	NA
M0_MCSF	Down	2510009E07Rik	72190	RIKEN cDNA 2510009E07 gene
M0_MCSF	Down	1700023H06Rik	69442	RIKEN cDNA 1700023H06 gene
M0_MCSF	Down	Gm9726	72159	LysM, putative peptidoglycan-binding, domain containing 1 pseudogene
M0_MCSF	Down	Pdzd7	100503041	PDZ domain containing 7
M0_MCSF	Down	Gm29164	NA	NA
M0_MCSF	Down	Gm6583	625424	predicted gene 6583
M0_MCSF	Down	Gm11505	NA	NA
M0_MCSF	Down	Eps8	13860	epidermal growth factor receptor pathway substrate 8
M0_MCSF	Down	Gm19653	100503356	uncharacterized protein C3orf38 homolog
M0_MCSF	Down	Naaa	67111	N-acylethanolamine acid amidase
M0_MCSF	Down	Wfdc17	100034251	WAP four-disulfide core domain 17
M0_MCSF	Down	Plxdc2	67448	plexin domain containing 2
M0_MCSF	Down	Rps6kl1	238323	ribosomal protein S6 kinase-like 1
M0_MCSF	Down	Plekha6	240753	pleckstrin homology domain containing, family A member 6
M0_MCSF	Down	Fbxo40	207215	F-box protein 40
M0_MCSF	Down	Gm26710	102633244	predicted gene, 26710
M0_MCSF	Down	Igsf3	78908	immunoglobulin superfamily, member 3
M0_MCSF	Down	Gbp11	634650	guanylate binding protein 11
M0_MCSF	Down	Gm29232	NA	NA
M0_MCSF	Down	Heatr9	629303	HEAT repeat containing 9
M0_MCSF	Down	Rarb	218772	retinoic acid receptor, beta
M0_MCSF	Down	Gm43126	NA	NA
M0_MCSF	Down	Palm	18483	paralemmin
M0_MCSF	Down	Yjefn3	234365	YjeF N-terminal domain containing 3
M0_MCSF	Down	Efr3b	668212	EFR3 homolog B
M0_MCSF	Down	Ror2	26564	receptor tyrosine kinase-like orphan receptor 2
M0_MCSF	Down	Tfr2	50765	transferrin receptor 2
M0_MCSF	Down	Cxcr1	227288	chemokine (C-X-C motif) receptor 1
M0_MCSF	Down	Snord83b	100302601	small nucleolar RNA, C/D box 83B
M0_MCSF	Down	Gm44432	NA	NA
M0_MCSF	Down	Zfp462	242466	zinc finger protein 462
M0_MCSF	Down	Gm9755	100041265	Tu translation elongation factor pseudogene
M0_MCSF	Down	Acat2	110460	acetyl-Coenzyme A acetyltransferase 2
M0_MCSF	Down	Hal	15109	histidine ammonia lyase
M0_MCSF	Down	Atg9b	213948	autophagy related 9B
M0_MCSF	Down	1500017E21Rik	NA	NA
M0_MCSF	Down	Igf2bp2	319765	insulin-like growth factor 2 mRNA binding protein 2
M0_MCSF	Down	Gm37336	105244023	predicted gene, 37336
M0_MCSF	Down	Rnf128	66889	ring finger protein 128
M0_MCSF	Down	Gm8292	666793	predicted gene 8292
M0_MCSF	Down	RP24-196H4.2	NA	NA
M0_MCSF	Down	Cyp26a1	13082	cytochrome P450, family 26, subfamily a, polypeptide 1
M0_MCSF	Down	Rpl19-ps12	208428	ribosomal protein L19, pseudogene 12
M0_MCSF	Down	Gm12915	102634646	predicted gene 12915
M0_MCSF	Down	RP23-248P8.1	NA	NA
M0_MCSF	Down	Hpx	15458	hemopexin
M0_MCSF	Down	Timm8a1	30058	translocase of inner mitochondrial membrane 8A1
M0_MCSF	Down	Dgat2	67800	diacylglycerol O-acyltransferase 2
M0_MCSF	Down	Ppargc1b	170826	peroxisome proliferative activated receptor, gamma, coactivator 1 beta
M0_MCSF	Down	Gm28809	NA	NA
M0_MCSF	Down	Gm15283	102637576	predicted gene 15283
M0_MCSF	Down	Gm6298	622213	predicted gene 6298
M0_MCSF	Down	Pitpnm2os2	100047482	phosphatidylinositol transfer protein, membrane-associated 2, opposite strand 2
M0_MCSF	Down	Gm10233	100043675	translocase of inner mitochondrial membrane 23 homolog pseudogene
M0_MCSF	Down	Rnaset2a	100037283	ribonuclease T2A
M0_MCSF	Down	6330403A02Rik	NA	NA
M0_MCSF	Down	Gm16758	102640752	predicted gene, 16758
M0_MCSF	Down	Gm12867	105244674	predicted gene 12867
M0_MCSF	Down	Gm42501	NA	NA
M0_MCSF	Down	Gm44205	NA	NA
M0_MCSF	Down	Gm44997	NA	NA
M0_MCSF	Down	P2rx3	228139	purinergic receptor P2X, ligand-gated ion channel, 3
M0_MCSF	Down	Lrp2bp	67620	Lrp2 binding protein
M0_MCSF	Down	Grik4	110637	glutamate receptor, ionotropic, kainate 4
M0_MCSF	Down	Foxc2	14234	forkhead box C2
M0_MCSF	Down	Gm12896	NA	NA
M0_MCSF	Down	Gm44649	NA	NA
M0_MCSF	Down	Asap2	211914	ArfGAP with SH3 domain, ankyrin repeat and PH domain 2
M0_MCSF	Down	Olfr1396|1	NA	NA
M0_MCSF	Down	Trim72	434246	tripartite motif-containing 72
M0_MCSF	Down	Zfp811	240063	zinc finger protein 811
M0_MCSF	Down	Tmem53	68777	transmembrane protein 53
M0_MCSF	Down	Rpl9-ps4	100042832	ribosomal protein L9, pseudogene 4
M0_MCSF	Down	4933431E20Rik	329735	RIKEN cDNA 4933431E20 gene
M0_MCSF	Down	Irf4	16364	interferon regulatory factor 4
M0_MCSF	Down	Ackr4	252837	atypical chemokine receptor 4
M0_MCSF	Down	Gm37415	NA	NA
M0_MCSF	Down	Gm37062	NA	NA
M0_MCSF	Down	Gt(ROSA)26Sor	14910	gene trap ROSA 26, Philippe Soriano
M0_MCSF	Down	Mir703	735265	microRNA 703
M0_MCSF	Down	Srm	20810	spermidine synthase
M0_MCSF	Down	Dlec1	320256	deleted in lung and esophageal cancer 1
M0_MCSF	Down	Gm16702	100504601	predicted gene, 16702
M0_MCSF	Down	Rpl6l	432502	ribosomal protein L6-like
M0_MCSF	Down	Kazald1	107250	Kazal-type serine peptidase inhibitor domain 1
M0_MCSF	Down	Gm20619	101056138	predicted gene 20619
M0_MCSF	Down	Gm10157	102639922	predicted gene 10157
M0_MCSF	Down	Pdlim1	54132	PDZ and LIM domain 1 (elfin)
M0_MCSF	Down	9430037O13Rik	77285	RIKEN cDNA 9430037O13 gene
M0_MCSF	Down	Gm28006	NA	NA
M0_MCSF	Down	Sod2	20656	superoxide dismutase 2, mitochondrial
M0_MCSF	Down	Ptpn5	19259	protein tyrosine phosphatase, non-receptor type 5
M0_MCSF	Down	Apon	28194	apolipoprotein N
M0_MCSF	Down	Gm11707	NA	NA
M0_MCSF	Down	Gm13812	241572	pyruvate kinase, muscle pseudogene
M0_MCSF	Down	Gm13810	668705	pyruvate kinase, muscle pseudogene
M0_MCSF	Down	Gm4929	238091	glyceraldehyde-3-phosphate dehydrogenase pseudogene
M0_MCSF	Down	Gm9435	668991	ribosomal protein L6 pseudogene
M0_MCSF	Down	Gm19345	100502736	predicted gene, 19345
M0_MCSF	Down	Mmp14	17387	matrix metallopeptidase 14 (membrane-inserted)
M0_MCSF	Down	Dok2	13449	docking protein 2
M0_MCSF	Down	Tmem151a	381199	transmembrane protein 151A
M0_MCSF	Down	Gm37986	NA	NA
M0_MCSF	Down	C3	12266	complement component 3
M0_MCSF	Down	A230072E10Rik	331547	RIKEN cDNA A230072E10 gene
M0_MCSF	Down	Aloxe3	23801	arachidonate lipoxygenase 3
M0_MCSF	Down	Wdr86	269633	WD repeat domain 86
M0_MCSF	Down	Hoxc10	209448	homeobox C10
M0_MCSF	Down	Mpdz	17475	multiple PDZ domain protein
M0_MCSF	Down	Serpina3b	271047	serine (or cysteine) peptidase inhibitor, clade A, member 3B
M0_MCSF	Down	Spint1	20732	serine protease inhibitor, Kunitz type 1
M0_MCSF	Down	Gm26180	NA	NA
M0_MCSF	Down	Gadd45g	23882	growth arrest and DNA-damage-inducible 45 gamma
M0_MCSF	Down	Relt	320100	RELT tumor necrosis factor receptor
M0_MCSF	Down	Syt2	20980	synaptotagmin II
M0_MCSF	Down	Sema3f	20350	sema domain, immunoglobulin domain (Ig), short basic domain, secreted, (semaphorin) 3F
M0_MCSF	Down	Napepld	242864	N-acyl phosphatidylethanolamine phospholipase D
M0_MCSF	Down	Tcf7	21414	transcription factor 7, T cell specific
M0_MCSF	Down	Schip1	30953	schwannomin interacting protein 1
M0_MCSF	Down	Lif	16878	leukemia inhibitory factor
M0_MCSF	Down	Pappa2	23850	pappalysin 2
M0_MCSF	Down	Gm15953	100418310	ubiquitin-like, containing PHD and RING finger domains, 1 pseudogene
M0_MCSF	Down	Murc	NA	NA
M0_MCSF	Down	Prkaa2	108079	protein kinase, AMP-activated, alpha 2 catalytic subunit
M0_MCSF	Down	Tppp3	67971	tubulin polymerization-promoting protein family member 3
M0_MCSF	Down	Pvt1	19296	Pvt1 oncogene
M0_MCSF	Down	Rnf43	207742	ring finger protein 43
M0_MCSF	Down	Gm38248	NA	NA
M0_MCSF	Down	Gm8724	667610	predicted pseudogene 8724
M0_MCSF	Down	Arntl2	272322	aryl hydrocarbon receptor nuclear translocator-like 2
M0_MCSF	Down	Sfrp4	20379	secreted frizzled-related protein 4
M0_MCSF	Down	Gm12944	102635997	60S ribosomal protein L21 pseudogene
M0_MCSF	Down	Adam11	11488	a disintegrin and metallopeptidase domain 11
M0_MCSF	Down	Gm6209	621304	predicted gene 6209
M0_MCSF	Down	Med9os	100504121	mediator complex subunit 9, opposite strand
M0_MCSF	Down	Gm10481	433845	glyceraldehyde-3-phosphate dehydrogenase pseudogene
M0_MCSF	Down	Gm7150	635136	glyceraldehyde-3-phosphate dehydrogenase pseudogene
M0_MCSF	Down	Wfdc18	14038	WAP four-disulfide core domain 18
M0_MCSF	Down	Plcb4	18798	phospholipase C, beta 4
M0_MCSF	Down	Serf1	20365	small EDRK-rich factor 1
M0_MCSF	Down	2810429I04Rik	76937	RIKEN cDNA 2810429I04 gene
M0_MCSF	Down	Gm5313	384461	glyceraldehyde-3-phosphate dehydrogenase pseudogene
M0_MCSF	Down	Ntng2	171171	netrin G2
M0_MCSF	Down	Bag2	213539	BCL2-associated athanogene 2
M0_MCSF	Down	Slc2a1	20525	solute carrier family 2 (facilitated glucose transporter), member 1
M0_MCSF	Down	Gm26904	NA	NA
M0_MCSF	Down	Gm37933	NA	NA
M0_MCSF	Down	Myo7a	17921	myosin VIIA
M0_MCSF	Down	Gm4045	100042816	ATP synthase, H+ transporting, mitochondrial F0 complex, subunit g pseudogene
M0_MCSF	Down	Ablim1	226251	actin-binding LIM protein 1
M0_MCSF	Down	Gm8814	667791	ferritin light chain 2 pseudogene
M0_MCSF	Down	Gm10169	100043796	macrophage migration inhibitory factor, pseudogene 4
M0_MCSF	Down	Cd247	12503	CD247 antigen
M0_MCSF	Down	Gm20621	100502684	predicted gene 20621
M0_MCSF	Down	Gm5560	433923	solute carrier family 25 member 5 pseudogene
M0_MCSF	Down	Tgm1	21816	transglutaminase 1, K polypeptide
M0_MCSF	Down	Ccbe1	320924	collagen and calcium binding EGF domains 1
M0_MCSF	Down	Ltbp4|1	NA	NA
M0_MCSF	Down	Gm24924	NA	NA
M0_MCSF	Down	Gm26244	NA	NA
M0_MCSF	Down	Gm5300	384350	glyceraldehyde-3-phosphate dehydrogenase pseudogene
M0_MCSF	Down	RP23-50L10.1	NA	NA
M0_MCSF	Down	Ccnd2	12444	cyclin D2
M0_MCSF	Down	Hspg2	15530	perlecan (heparan sulfate proteoglycan 2)
M0_MCSF	Down	Cyp4f39	320997	cytochrome P450, family 4, subfamily f, polypeptide 39
M0_MCSF	Down	RP24-337F7.3	NA	NA
M0_MCSF	Down	Spint2	20733	serine protease inhibitor, Kunitz type 2
M0_MCSF	Down	Gm7251	638833	glyceraldehyde-3-phosphate dehydrogenase pseudogene
M0_MCSF	Down	Gm10327	100041399	glyceraldehyde-3-phosphate dehydrogenase pseudogene
M0_MCSF	Down	Nnmt	18113	nicotinamide N-methyltransferase
M0_MCSF	Down	Dbil5	13168	diazepam binding inhibitor-like 5
M0_MCSF	Down	Gm43738	NA	NA
M0_MCSF	Down	Gm13610	105244114	predicted gene 13610
M0_MCSF	Down	Cd24a	12484	CD24a antigen
M0_MCSF	Down	AI427809	381524	expressed sequence AI427809
M0_MCSF	Down	Gm14231	433546	ribosomal protein L9 pseudogene
M0_MCSF	Down	Serpinb1b	282663	serine (or cysteine) peptidase inhibitor, clade B, member 1b
M0_MCSF	Down	Fam20a	208659	family with sequence similarity 20, member A
M0_MCSF	Down	mt-Tl1	NA	NA
M0_MCSF	Down	Gbp8	76074	guanylate-binding protein 8
M0_MCSF	Down	Aqp1	11826	aquaporin 1
M0_MCSF	Down	Itga7	16404	integrin alpha 7
M0_MCSF	Down	Adra2a	11551	adrenergic receptor, alpha 2a
M0_MCSF	Down	Zfp532	328977	zinc finger protein 532
M0_MCSF	Down	D330050G23Rik	320975	RIKEN cDNA D330050G23 gene
M0_MCSF	Down	Gm16310	NA	NA
M0_MCSF	Down	Gm7357	664830	Moloney leukemia virus 10 pseudogene
M0_MCSF	Down	Pdzrn3	55983	PDZ domain containing RING finger 3
M0_MCSF	Down	Tmem88	67020	transmembrane protein 88
[truncated: 19,370 more rows]

## Sheet: Proteomics
Subtype	Expr	Marker	UniProt	ANNOTATION
M0	UP	Tk1	P04184	thymidine kinase 1
M0	UP	Pclaf	Q9CQX4	PCNA clamp associated factor
M0	UP	Asf1b	Q9DAP7	anti-silencing function 1B histone chaperone
M0	UP	Nusap1	Q9ERH4	nucleolar and spindle associated protein 1
M0	UP	Plk1	Q07832	polo like kinase 1
M0	UP	Ube2c	Q9D1C1	ubiquitin-conjugating enzyme E2C
M0	UP	NA	Q9JJ11	NA
M0	UP	Mki67	E9PVX6	antigen identified by monoclonal antibody Ki 67
M0	UP	Prc1	Q99K43	protein regulator of cytokinesis 1
M0	UP	Rrm1	P07742	ribonucleotide reductase M1
M0	UP	Lig1	P37913	ligase I, DNA, ATP-dependent
M0	UP	Kif2c	Q922S8	kinesin family member 2C
M0	UP	Topbp1	Q6ZQF0	topoisomerase (DNA) II binding protein 1
M0	UP	Sirt1	Q923E4	sirtuin 1
M0	UP	Cdk1	P11440	cyclin-dependent kinase 1
M0	UP	Hirip3	Q8BLH7	HIRA interacting protein 3
M0	UP	Serinc3	Q9QZI9	serine incorporator 3
M0	UP	Dnajc9	Q91WN1	DnaJ heat shock protein family (Hsp40) member C9
M0	UP	c("4921501E09Rik", "Phf8")	Q80TJ7	c("RIKEN cDNA 4921501E09 gene", "PHD finger protein 8")
M0	UP	Chaf1a	Q9QWF0	chromatin assembly factor 1, subunit A (p150)
M0	UP	NA	Q08024-2	NA
M0	UP	Slc43a2	Q8CGA3	solute carrier family 43, member 2
M0	UP	Ccdc12	Q8R344	coiled-coil domain containing 12
M0	UP	Msh2	P43247	mutS homolog 2
M0	UP	Ptma	P26350	prothymosin alpha
M0	UP	Mcm2	P97310	minichromosome maintenance complex component 2
M0	UP	Smchd1	Q6P5D8	SMC hinge domain containing 1
M0	UP	Kif15	Q6P9L6	kinesin family member 15
M0	UP	NA	P0DOG8	NA
M0	UP	Cdk2	P97377	cyclin-dependent kinase 2
M0	UP	1110004F10Rik	Q9R0P4	RIKEN cDNA 1110004F10 gene
M0	UP	Tmpo	Q61033	thymopoietin
M0	UP	Smc2	Q8CG48	structural maintenance of chromosomes 2
M0	UP	Cirbp	P60824	cold inducible RNA binding protein
M0	UP	Gtf3c2	Q8BL74	general transcription factor IIIC, polypeptide 2, beta
M0	UP	NA	Q8K2Z4-2	NA
M0	UP	Mcm4	P49717	minichromosome maintenance complex component 4
M0	UP	Mad2l1	Q9Z1B5	MAD2 mitotic arrest deficient-like 1
M0	UP	Ran	P62827	RAN, member RAS oncogene family
M0	UP	Smc4	Q8CG47	structural maintenance of chromosomes 4
M0	UP	NA	O88842	NA
M0	UP	c("Evi2b", "Evi2")	Q8VD58	c("ecotropic viral integration site 2b", "ecotropic viral integration site 2")
M0	UP	Tmpo	Q61029	thymopoietin
M0	UP	Pola1	P33609	polymerase (DNA directed), alpha 1
M0	UP	Noc4l	Q8BHY2	NOC4 like
M0	UP	Hmgb2	P30681	high mobility group box 2
M0	UP	NA	P39749	NA
M0	UP	Bub3	Q9WVA3	BUB3 mitotic checkpoint protein
M0	UP	Chaf1b	Q9D0N7	chromatin assembly factor 1, subunit B (p60)
M0	UP	Sae1	Q9R1T2	SUMO1 activating enzyme subunit 1
M0	UP	Stmn1	P54227	stathmin 1
M0	UP	NA	P11103	NA
M0	UP	Epb41	P48193	erythrocyte membrane protein band 4.1
M0	UP	Arhgef10l	A2AWP8	Rho guanine nucleotide exchange factor (GEF) 10-like
M0	UP	Pcna	P17918	proliferating cell nuclear antigen
M0	UP	Hdac2	P70288	histone deacetylase 2
M0	UP	NA	Q64012-2	NA
M0	UP	Helb	Q6NVF4	helicase (DNA) B
M0	UP	Trim28	Q62318	tripartite motif-containing 28
M0	UP	C330027C09Rik	Q8BWY9	RIKEN cDNA C330027C09 gene
M0	UP	Gtf3c6	Q9D8P7	general transcription factor IIIC, polypeptide 6, alpha
M0	UP	Wdr12	Q9JJA4	WD repeat domain 12
M0	UP	Rcc2	Q8BK67	regulator of chromosome condensation 2
M0	UP	Wdhd1	P59328	WD repeat and HMG-box DNA binding protein 1
M0	UP	Trim47	Q8C0E3	tripartite motif-containing 47
M0	UP	Erh	P84089	ERH mRNA splicing and mitosis factor
M0	UP	1110059G10Rik	Q8K039	RIKEN cDNA 1110059G10 gene
M0	UP	Ep300	B2RWS6	E1A binding protein p300
M0	UP	Sh3bp5	Q9Z131	SH3-domain binding protein 5 (BTK-associated)
M0	UP	NA	P23198	NA
M0	UP	Nfatc2	Q60591	nuclear factor of activated T cells, cytoplasmic, calcineurin dependent 2
M0	UP	Clic1	Q9Z1Q5	chloride intracellular channel 1
M0	UP	Coro1a	O89053	coronin, actin binding protein 1A
M0	UP	Hmgb3	O54879	high mobility group box 3
M0	UP	Ckb	Q04447	creatine kinase, brain
M0	UP	Pqbp1	Q91VJ5	polyglutamine binding protein 1
M0	UP	Cse1l	Q9ERK4	chromosome segregation 1-like (S. cerevisiae)
M0	UP	Hpf1	Q8CFE2	histone PARylation factor 1
M0	UP	Dek	Q7TNV0	DEK oncogene (DNA binding)
M0	UP	Numa1	E9Q7G0	nuclear mitotic apparatus protein 1
M0	UP	Spns1	Q8R0G7	spinster homolog 1
M0	UP	Srsf6	Q3TWW8	serine/arginine-rich splicing factor 6
M0	UP	Rpa1	Q8VEE4	replication protein A1
M0	UP	Cggbp1	Q8BHG9	CGG triplet repeat binding protein 1
M0	UP	Larp7	Q05CL8	La ribonucleoprotein domain family, member 7
M0	UP	NA	P61979-2	NA
M0	UP	1810009A15Rik	Q9D937	RIKEN cDNA 1810009A15 gene
M0	UP	NA	Q8VE97	NA
M0	UP	Lmnb1	P14733	lamin B1
M0	UP	Hp1bp3	Q3TEA8	heterochromatin protein 1, binding protein 3
M0	UP	Prim2	P33610	DNA primase, p58 subunit
M0	UP	Tpm3	P21107	tropomyosin 3, gamma
M0	UP	Fmnl1	Q9JL26	formin-like 1
M0	UP	Tubb5	P99024	tubulin, beta 5 class I
M0	UP	Cpsf2	O35218	cleavage and polyadenylation specific factor 2
M0	UP	Ugt1a7c	Q6ZQM8	UDP glucuronosyltransferase 1 family, polypeptide A7C
M0	UP	Bclaf1	Q8K019	BCL2-associated transcription factor 1
M0	UP	Parl	Q5XJY4	presenilin associated, rhomboid-like
M0	UP	Mthfd1l	Q3V3R1	methylenetetrahydrofolate dehydrogenase (NADP+ dependent) 1-like
M0	UP	Paics	Q9DCL9	phosphoribosylaminoimidazole carboxylase, phosphoribosylaminoribosylaminoimidazole, succinocarboxamide synthetase
M0	UP	Sfpq	Q8VIJ6	splicing factor proline/glutamine rich (polypyrimidine tract binding protein associated)
M0	UP	Htatsf1	Q8BGC0	HIV TAT specific factor 1
M0	UP	Rassf2	Q8BMS9	Ras association (RalGDS/AF-6) domain family member 2
M0	UP	Tubb4b	P68372	tubulin, beta 4B class IVB
M0	UP	Lancl2	Q9JJK2	LanC (bacterial lantibiotic synthetase component C)-like 2
M0	UP	Mapk1	P63085	mitogen-activated protein kinase 1
M0	UP	Fam105a	Q3TVP5	family with sequence similarity 105, member A
M0	UP	Uhrf2	Q7TMI3	ubiquitin-like, containing PHD and RING finger domains 2
M0	UP	NA	P21107-2	NA
M0	UP	Arhgef2	Q60875	rho/rac guanine nucleotide exchange factor (GEF) 2
M0	UP	NA	Q5DW34-2	NA
M0	UP	Inpp5d	Q9ES52	inositol polyphosphate-5-phosphatase D
M0	UP	Nup155	Q99P88	nucleoporin 155
M0	UP	NA	Q9Z0H4-9	NA
M0	UP	Fkbp5	Q64378	FK506 binding protein 5
M0	UP	Jpt2	Q6PGH2	Jupiter microtubule associated homolog 2
M0	UP	Jpt1	P97825	Jupiter microtubule associated homolog 1
M0	UP	Wasf2	Q8BH43	WAS protein family, member 2
M0	UP	NA	P70388	NA
M0	UP	Dtymk	P97930	deoxythymidylate kinase
M0	UP	Ncl	P09405	nucleolin
M0	UP	Lsm8	Q6ZWM4	LSM8 homolog, U6 small nuclear RNA associated
M0	UP	Rpl23a	P62751	ribosomal protein L23A
M0	UP	Fhod1	Q6P9Q4	formin homology 2 domain containing 1
M0	UP	Skiv2l2	Q9CZU3	superkiller viralicidic activity 2-like 2 (S. cerevisiae)
M0	UP	Dnajc8	Q6NZB0	DnaJ heat shock protein family (Hsp40) member C8
M0	UP	Clpx	Q9JHS4	caseinolytic mitochondrial matrix peptidase chaperone subunit
M0	UP	Hnrnpl	Q8R081	heterogeneous nuclear ribonucleoprotein L
M0	UP	Anp32e	P97822	acidic (leucine-rich) nuclear phosphoprotein 32 family, member E
M0	UP	Tagln2	Q9WVA4	transgelin 2
M0	UP	Kcnab2	P62482	potassium voltage-gated channel, shaker-related subfamily, beta member 2
M0	UP	Cotl1	Q9CQI6	coactosin-like 1 (Dictyostelium)
M0	UP	Mapre1	Q61166	microtubule-associated protein, RP/EB family, member 1
M0	UP	Pspc1	Q8R326	paraspeckle protein 1
M0	UP	Ubr7	Q8BU04	ubiquitin protein ligase E3 component n-recognin 7 (putative)
M0	UP	Creb1	Q01147	cAMP responsive element binding protein 1
M0	UP	Hnrnpab	Q99020	heterogeneous nuclear ribonucleoprotein A/B
M0	UP	Srrm1	Q52KI8	serine/arginine repetitive matrix 1
M0	UP	Prpf40a	Q9R1C7	pre-mRNA processing factor 40A
M0	UP	Dera	Q91YP3	deoxyribose-phosphate aldolase (putative)
M0	UP	Tardbp	Q921F2	TAR DNA binding protein
M0	UP	U2af1	Q9D883	U2 small nuclear ribonucleoprotein auxiliary factor (U2AF) 1
M0	UP	Actr2	P61161	ARP2 actin-related protein 2
M0	UP	Gtpbp1	O08582	GTP binding protein 1
M0	UP	Prpf31	Q8CCF0	pre-mRNA processing factor 31
M0	UP	Dnttip2	Q8R2M2	deoxynucleotidyltransferase, terminal, interacting protein 2
M0	UP	Prpf6	Q91YR7	pre-mRNA splicing factor 6
M0	UP	Grk2	Q99MK8	G protein-coupled receptor kinase 2
M0	UP	NA	Q9JMH9-6	NA
M0	UP	Bag1	Q60739	BCL2-associated athanogene 1
M0	UP	Hdgf	P51859	hepatoma-derived growth factor
M0	UP	Stat6	P52633	signal transducer and activator of transcription 6
M0	UP	Camk1d	Q8BW96	calcium/calmodulin-dependent protein kinase ID
M0	UP	Sod1	P08228	superoxide dismutase 1, soluble
M0	UP	Tsn	Q62348	translin
M0	UP	C5ar1	P30993	complement component 5a receptor 1
M0	UP	Ccdc50	Q810U5	coiled-coil domain containing 50
M0	UP	Rpl37a	P61514	ribosomal protein L37a
M0	UP	Ctnnbl1	Q9CWL8	catenin, beta like 1
M0	UP	NA	Q99KG3-2	NA
M0	UP	Ap1m1	P35585	adaptor-related protein complex AP-1, mu subunit 1
M0	UP	Milr1	Q3TB92	mast cell immunoglobulin like receptor 1
M0	UP	Lrrfip1	Q3UZ39	leucine rich repeat (in FLII) interacting protein 1
M0	UP	Ik	Q9Z1M8	IK cytokine
M0	UP	Dpy19l1	A6X919	dpy-19-like 1 (C. elegans)
M0	UP	Ankmy2	Q3TPE9	ankyrin repeat and MYND domain containing 2
M0	UP	Rpl11	Q9CXW4	ribosomal protein L11
M0	UP	Hnrnpa3	Q8BG05	heterogeneous nuclear ribonucleoprotein A3
M0	UP	Fsd1l	Q8BYN5	fibronectin type III and SPRY domain containing 1-like
M0	UP	Srsf2	Q62093	serine/arginine-rich splicing factor 2
M0	UP	Rpl27a	P14115	ribosomal protein L27A
M0	UP	Elmo1	Q8BPU7	engulfment and cell motility 1
M0	UP	Rpl6	P47911	ribosomal protein L6
M0	UP	Txnl1	Q8CDN6	thioredoxin-like 1
M0	UP	Rad23b	P54728	RAD23 homolog B, nucleotide excision repair protein
M0	UP	Nfu1	Q9QZ23	NFU1 iron-sulfur cluster scaffold
M0	UP	Rpl7a	P12970	ribosomal protein L7A
M0	UP	Hars	Q61035	histidyl-tRNA synthetase
M0	UP	c("Rps6", "LOC105244208")	P62754	c("ribosomal protein S6", "40S ribosomal protein S6")
M0	UP	NA	Q91YE6	NA
M0	UP	Gmip	Q6PGG2	Gem-interacting protein
M0	UP	Nudt4	Q8R2U6	nudix (nucleoside diphosphate linked moiety X)-type motif 4
M0	UP	Npm3	Q9CPP0	nucleoplasmin 3
M0	UP	Rpl3	P27659	ribosomal protein L3
M0	UP	Son	Q9QX47	Son DNA binding protein
M0	UP	Csnk2a1	Q60737	casein kinase 2, alpha 1 polypeptide
M0	UP	Ech1	O35459	enoyl coenzyme A hydratase 1, peroxisomal
M0	UP	NA	P23090	NA
M0	UP	NA	Q99NB9	NA
M0	UP	Psmd1	Q3TXS7	proteasome (prosome, macropain) 26S subunit, non-ATPase, 1
M0	UP	Ppm1g	Q61074	protein phosphatase 1G (formerly 2C), magnesium-dependent, gamma isoform
M0	UP	Srsf1	Q6PDM2	serine/arginine-rich splicing factor 1
M0	UP	Rps3a1	P97351	ribosomal protein S3A1
M0	UP	Nup50	Q9JIH2	nucleoporin 50
M0	UP	Nav1	Q8CH77	neuron navigator 1
M0	UP	Ctr9	Q62018	CTR9 homolog, Paf1/RNA polymerase II complex component
M0	UP	Ddx19a	Q61655	DEAD (Asp-Glu-Ala-Asp) box polypeptide 19a
M0	UP	Snrnp200	Q6P4T2	small nuclear ribonucleoprotein 200 (U5)
M0	UP	Serbp1	Q9CY58	serpine1 mRNA binding protein 1
M0	UP	Cdk11b	P24788	cyclin-dependent kinase 11B
M0	UP	Anxa5	P48036	annexin A5
M0	UP	Ube2g1	P62254	ubiquitin-conjugating enzyme E2G 1
M0	DOWN	NA	P08101-2	NA
M0	DOWN	H2-Ab1	P14483	histocompatibility 2, class II antigen A, beta 1
M0	DOWN	Rab20	P35295	RAB20, member RAS oncogene family
M0	DOWN	Sowahc	Q8C0J6	sosondowah ankyrin repeat domain family member C
M0	DOWN	Plxna1	P70206	plexin A1
M0	DOWN	Ptgs1	P22437	prostaglandin-endoperoxide synthase 1
M0	DOWN	H2-Aa	P14434	histocompatibility 2, class II antigen A, alpha
M0	DOWN	Lilrb4a	Q64281	leukocyte immunoglobulin-like receptor, subfamily B, member 4A
M0	DOWN	Stard5	Q9EPQ7	StAR-related lipid transfer (START) domain containing 5
M0	DOWN	Ptpn1	P35821	protein tyrosine phosphatase, non-receptor type 1
M0	DOWN	Arf4	P61750	ADP-ribosylation factor 4
M0	DOWN	Ctss	O70370	cathepsin S
M0	DOWN	Prkcd	P28867	protein kinase C, delta
M0	DOWN	Trim56	Q80VI1	tripartite motif-containing 56
M0	DOWN	Cyba	Q61462	cytochrome b-245, alpha polypeptide
M0	DOWN	Sumf1	Q8R0F3	sulfatase modifying factor 1
M0	DOWN	Rrbp1	Q99PL5	ribosome binding protein 1
M0	DOWN	Fam20c	Q5MJS3	family with sequence similarity 20, member C
M0	DOWN	Mapre2	Q8R001	microtubule-associated protein, RP/EB family, member 2
M0	DOWN	Dnm3	Q8BZ98	dynamin 3
M0	DOWN	Arfgap3	Q9D8S3	ADP-ribosylation factor GTPase activating protein 3
M0	DOWN	Syap1	Q9D5V6	synapse associated protein 1
M0	DOWN	Papss2	O88428	3'-phosphoadenosine 5'-phosphosulfate synthase 2
M0	DOWN	Atxn2	O70305	ataxin 2
M0	DOWN	Gda	Q9R111	guanine deaminase
M0	DOWN	Aldh1l1	Q8R0Y6	aldehyde dehydrogenase 1 family, member L1
M0	DOWN	Rhoc	Q62159	ras homolog family member C
M0	DOWN	Pfkp	Q9WUA3	phosphofructokinase, platelet
M0	DOWN	Arl1	P61211	ADP-ribosylation factor-like 1
M0	DOWN	Copb1	Q9JIF7	coatomer protein complex, subunit beta 1
M0	DOWN	Snd1	Q78PY7	staphylococcal nuclease and tudor domain containing 1
M0	DOWN	Lap3	Q9CPY7	leucine aminopeptidase 3
M0	DOWN	Npepps	Q11011	aminopeptidase puromycin sensitive
M0	DOWN	Erap1	Q9EQH2	endoplasmic reticulum aminopeptidase 1
M0	DOWN	Acsl5	Q8JZR0	acyl-CoA synthetase long-chain family member 5
M0	DOWN	Gna13	P27601	guanine nucleotide binding protein, alpha 13
M0	DOWN	Diaph2	O70566	diaphanous related formin 2
M0	DOWN	Fabp4	P04117	fatty acid binding protein 4, adipocyte
M0	DOWN	Appl1	Q8K3H0	adaptor protein, phosphotyrosine interaction, PH domain and leucine zipper containing 1
M0	DOWN	Ubap1	Q8BH48	ubiquitin-associated protein 1
M0	DOWN	Srpr	Q9DBG7	signal recognition particle receptor ('docking protein')
M0	DOWN	NA	Q8BZN6-3	NA
M0	DOWN	NA	Q9Z0H8-2	NA
M0	DOWN	Gripap1	Q8VD04	GRIP1 associated protein 1
M0	DOWN	Mief1	Q8BGV8	mitochondrial elongation factor 1
M0	DOWN	Ap1s1	P61967	adaptor protein complex AP-1, sigma 1
M0	DOWN	Rabgef1	Q9JM13	RAB guanine nucleotide exchange factor (GEF) 1
M0	DOWN	Hk2	O08528	hexokinase 2
M0	DOWN	NA	Q8BY89-2	NA
M0	DOWN	Canx	P35564	calnexin
M0	DOWN	Sec22b	O08547	SEC22 homolog B, vesicle trafficking protein
M0	DOWN	Ptpn23	Q6PB44	protein tyrosine phosphatase, non-receptor type 23
M0	DOWN	Asb6	Q91ZU1	ankyrin repeat and SOCS box-containing 6
M1	UP	Ifit1	Q64282	interferon-induced protein with tetratricopeptide repeats 1
M1	UP	Ifit2	Q64112	interferon-induced protein with tetratricopeptide repeats 2
M1	UP	Ifi205	Q8CGE8	interferon activated gene 205
M1	UP	Isg15	Q64339	ISG15 ubiquitin-like modifier
M1	UP	Gbp2	Q9Z0E6	guanylate binding protein 2
M1	UP	Gbp3	Q61107	guanylate binding protein 3
M1	UP	Ifi209	Q8BV49	interferon activated gene 209
M1	UP	Daxx	O35613	Fas death domain-associated protein
M1	UP	Ifi204	P0DOV2	interferon activated gene 204
M1	UP	Sod2	P09671	superoxide dismutase 2, mitochondrial
M1	UP	Marcksl1	P28667	MARCKS-like 1
M1	UP	Hmox1	P14901	heme oxygenase 1
M1	UP	Ube2l6	Q9QZU9	ubiquitin-conjugating enzyme E2L 6
M1	UP	Car13	Q9D6N1	carbonic anhydrase 13
M1	UP	NA	P42225	NA
M1	UP	Parp14	Q2EMV9	poly (ADP-ribose) polymerase family, member 14
M1	UP	Fscn1	Q61553	fascin actin-bundling protein 1
M1	UP	Flnb	Q80X90	filamin, beta
M1	UP	Stx11	Q9D3G5	syntaxin 11
M1	UP	Oas1a	P11928	2'-5' oligoadenylate synthetase 1A
M1	UP	Ass1	P16460	argininosuccinate synthetase 1
M1	UP	Lacc1	Q8BZT9	laccase (multicopper oxidoreductase) domain containing 1
M1	UP	Icam1	P13597	intercellular adhesion molecule 1
M1	UP	Pnp	P23492	purine-nucleoside phosphorylase
M1	UP	Pik3ap1	Q9EQ32	phosphoinositide-3-kinase adaptor protein 1
M1	UP	Dhx58	Q99J87	DEXH (Asp-Glu-X-His) box polypeptide 58
M1	UP	Tapbp	Q9R233	TAP binding protein
M1	UP	Sp110	Q8BVK9	Sp110 nuclear body protein
M1	UP	Tor3a	Q9ER38	torsin family 3, member A
M1	UP	Ly6e	Q64253	lymphocyte antigen 6 complex, locus E
M1	UP	NA	Q62191	NA
M1	UP	Eif2ak2	Q03963	eukaryotic translation initiation factor 2-alpha kinase 2
M1	UP	Med10	Q9CXU0	mediator complex subunit 10
M1	UP	Ccl7	Q03366	chemokine (C-C motif) ligand 7
M1	UP	NA	P24063	NA
M1	UP	Fndc3a	Q8BX90	fibronectin type III domain containing 3A
M1	UP	Tax1bp1	Q3UKC1	Tax1 (human T cell leukemia virus type I) binding protein 1
M1	UP	NA	P59823	NA
M1	UP	Nfkb2	Q9WTK5	nuclear factor of kappa light polypeptide gene enhancer in B cells 2, p49/p100
M1	UP	Themis2	Q91YX0	thymocyte selection associated family member 2
M1	UP	Znfx1	Q8R151	zinc finger, NFX1-type containing 1
M1	UP	Itga5	P11688	integrin alpha 5 (fibronectin receptor alpha)
M1	UP	H2-D1	P01899	histocompatibility 2, D region locus 1
M1	UP	Sp100	O35892	nuclear antigen Sp100
M1	UP	Slc31a2	Q9CPU9	solute carrier family 31, member 2
M1	UP	Lcp2	Q60787	lymphocyte cytosolic protein 2
M1	UP	1600014C10Rik	Q8WUR0	RIKEN cDNA 1600014C10 gene
M1	UP	Cers6	Q8C172	ceramide synthase 6
M1	UP	Gm4070	Q80SU7	predicted gene 4070
M1	UP	H2-K1	P01901	histocompatibility 2, K1, K region
M1	UP	Usp25	P57080	ubiquitin specific peptidase 25
M1	UP	Slc2a1	P17809	solute carrier family 2 (facilitated glucose transporter), member 1
M1	UP	B2m	P01887	beta-2 microglobulin
M1	UP	Bsg	P18572	basigin
M1	UP	Parp12	Q8BZ20	poly (ADP-ribose) polymerase family, member 12
M1	UP	NA	Q60715-2	NA
M1	UP	Stat3	P42227	signal transducer and activator of transcription 3
M1	UP	NA	Q99J72	NA
M1	UP	c("Psme2", "Psme2b")	P97372	c("proteasome (prosome, macropain) activator subunit 2 (PA28 beta)", "protease (prosome, macropain) activator subunit 2B")
M1	UP	Dnaja1	P63037	DnaJ heat shock protein family (Hsp40) member A1
M1	UP	Nampt	Q99KQ4	nicotinamide phosphoribosyltransferase
M1	UP	Aldh1b1	Q9CZS1	aldehyde dehydrogenase 1 family, member B1
M1	UP	Prdx5	P99029	peroxiredoxin 5
M1	UP	Ogfr	Q99PG2	opioid growth factor receptor
M1	UP	Casp1	P29452	caspase 1
M1	UP	Pml	Q60953	promyelocytic leukemia
M1	UP	Plek	Q9JHK5	pleckstrin
M1	UP	Prdx1	P35700	peroxiredoxin 1
M1	UP	NA	Q921T2-2	NA
M1	UP	Ehd1	Q9WVK4	EH-domain containing 1
M1	UP	Pstpip2	Q99M15	proline-serine-threonine phosphatase-interacting protein 2
M1	UP	Vasp	P70460	vasodilator-stimulated phosphoprotein
M1	UP	Slc23a2	Q9EPR4	solute carrier family 23 (nucleobase transporters), member 2
M1	UP	Malt1	Q2TBA3	MALT1 paracaspase
M1	UP	G3bp2	P97379	GTPase activating protein (SH3 domain) binding protein 2
M1	UP	Pirb	P97484	paired Ig-like receptor B
M1	UP	Tdrd7	Q8K1H1	tudor domain containing 7
M1	UP	Sppl2a	Q9JJF9	signal peptide peptidase like 2A
M1	UP	Morc3	F7BJB9	microrchidia 3
M1	UP	Psme1	P97371	proteasome (prosome, macropain) activator subunit 1 (PA28 alpha)
M1	UP	Lyn	P25911	LYN proto-oncogene, Src family tyrosine kinase
M1	UP	Slc31a1	Q8K211	solute carrier family 31, member 1
M1	UP	Nadk	P58058	NAD kinase
M1	UP	Dck	P43346	deoxycytidine kinase
M1	UP	Gnb4	P29387	guanine nucleotide binding protein (G protein), beta 4
M1	UP	Cybb	Q61093	cytochrome b-245, beta polypeptide
M1	UP	Ifitm3	Q9CQW9	interferon induced transmembrane protein 3
M1	UP	Adgre1	Q61549	adhesion G protein-coupled receptor E1
M1	UP	Sash1	P59808	SAM and SH3 domain containing 1
M1	UP	Cebpb	P28033	CCAAT/enhancer binding protein (C/EBP), beta
M1	UP	Micall2	Q3TN34	MICAL-like 2
M1	UP	Bcl10	Q9Z0H7	B cell leukemia/lymphoma 10
M1	UP	Marcks	P26645	myristoylated alanine rich protein kinase C substrate
M1	UP	Rab20	P35295	RAB20, member RAS oncogene family
M1	UP	Kpna3	O35344	karyopherin (importin) alpha 3
M1	UP	Syk	P48025	spleen tyrosine kinase
M1	UP	Fcer1g	P20491	Fc receptor, IgE, high affinity I, gamma polypeptide
M1	UP	Fcgr4	A0A0B4J1G0	Fc receptor, IgG, low affinity IV
M1	UP	Tbc1d13	Q8R3D1	TBC1 domain family, member 13
M1	UP	Mcmbp	Q8R3C0	minichromosome maintenance complex binding protein
M1	UP	Dbnl	Q62418	drebrin-like
M1	UP	Pik3r5	Q5SW28	phosphoinositide-3-kinase regulatory subunit 5
M1	UP	Sbds	P70122	SBDS ribosome maturation factor
M1	UP	Larp1	Q6ZQ58	La ribonucleoprotein domain family, member 1
M1	UP	Tapbpl	Q8VD31	TAP binding protein-like
M1	UP	Gys1	Q9Z1E4	glycogen synthase 1, muscle
M1	UP	Ampd3	O08739	adenosine monophosphate deaminase 3
M1	UP	NA	Q8CHC4	NA
M1	UP	NA	O35711-4	NA
M1	UP	Psmd10	Q9Z2X2	proteasome (prosome, macropain) 26S subunit, non-ATPase, 10
M1	UP	Eif4g2	Q62448	eukaryotic translation initiation factor 4, gamma 2
M1	UP	Mvp	Q9EQK5	major vault protein
M1	UP	Ccdc94	Q9D6J3	coiled-coil domain containing 94
M1	UP	Nub1	P54729	negative regulator of ubiquitin-like proteins 1
M1	UP	Clic4	Q9QYB1	chloride intracellular channel 4 (mitochondrial)
M1	UP	Hcls1	P49710	hematopoietic cell specific Lyn substrate 1
M1	UP	Ero1l	Q8R180	ERO1-like (S. cerevisiae)
M1	UP	Ak4	Q9WUR9	adenylate kinase 4
M1	UP	Fyb	O35601	FYN binding protein
M1	UP	Slc39a14	Q75N73	solute carrier family 39 (zinc transporter), member 14
M1	UP	Plekha2	Q9ERS5	pleckstrin homology domain-containing, family A (phosphoinositide binding specific) member 2
M1	UP	Rac2	Q05144	RAS-related C3 botulinum substrate 2
M1	UP	Rnf149	Q3U2C5	ring finger protein 149
M1	UP	Itgb1	P09055	integrin beta 1 (fibronectin receptor beta)
M1	UP	Junb	P09450	jun B proto-oncogene
M1	UP	Ptprj	Q64455	protein tyrosine phosphatase, receptor type, J
M1	UP	Creb5	Q8K1L0	cAMP responsive element binding protein 5
M1	UP	Mapkapk2	P49138	MAP kinase-activated protein kinase 2
M1	UP	Blvrb	Q923D2	biliverdin reductase B (flavin reductase (NADPH))
M1	UP	NA	O08599-2	NA
M1	UP	Crlf3	Q9Z2L7	cytokine receptor-like factor 3
M1	UP	NA	Q6P6L0	NA
M1	UP	Ist1	Q9CX00	increased sodium tolerance 1 homolog (yeast)
M1	UP	Rhbdf2	Q80WQ6	rhomboid 5 homolog 2
M1	UP	Mkln1	O89050	muskelin 1, intracellular mediator containing kelch motifs
M1	UP	NA	Q6DFW0	NA
M1	UP	Zcchc6	Q5BLK4	zinc finger, CCHC domain containing 6
M1	UP	NA	Q6PFR5	NA
M1	UP	Skap2	Q3UND0	src family associated phosphoprotein 2
M1	UP	NA	Q9Z224	NA
M1	UP	Mtdh	Q80WJ7	metadherin
M1	UP	Rps27a	P62983	ribosomal protein S27A
M1	UP	Gsdmd	Q9D8T2	gasdermin D
M1	UP	Itga4	Q00651	integrin alpha 4
M1	UP	Mpp1	P70290	membrane protein, palmitoylated
M1	UP	Txn1	P10639	thioredoxin 1
M1	UP	Pgm2	Q9D0F9	phosphoglucomutase 2
M1	UP	Abracl	Q4KML4	ABRA C-terminal like
M1	UP	Cnn2	Q08093	calponin 2
M1	UP	Gmppb	Q8BTZ7	GDP-mannose pyrophosphorylase B
M1	UP	NA	Q9JJX6	NA
M1	UP	Stxbp3	Q60770	syntaxin binding protein 3
M1	UP	Ift22	Q9DAI2	intraflagellar transport 22
M1	UP	Rin2	Q9D684	Ras and Rab interactor 2
M1	UP	Dync1h1	Q9JHU4	dynein cytoplasmic 1 heavy chain 1
M1	UP	Esd	Q9R0P3	esterase D/formylglutathione hydrolase
M1	UP	Ptk2b	Q9QVP9	PTK2 protein tyrosine kinase 2 beta
M1	UP	Inpp5b	Q8K337	inositol polyphosphate-5-phosphatase B
M1	UP	Ppp1r11	Q8K1L5	protein phosphatase 1, regulatory (inhibitor) subunit 11
M1	UP	Itpr1	P11881	inositol 1,4,5-trisphosphate receptor 1
M1	UP	Slc12a9	Q99MR3	solute carrier family 12 (potassium/chloride transporters), member 9
M1	UP	Stau1	Q9Z108	staufen double-stranded RNA binding protein 1
M1	UP	Pabpc1	P29341	poly(A) binding protein, cytoplasmic 1
M1	UP	Trim56	Q80VI1	tripartite motif-containing 56
M1	UP	Rilpl2	Q99LE1	Rab interacting lysosomal protein-like 2
M1	UP	Glrx	Q9QUH0	glutaredoxin
M1	UP	Casp3	P70677	caspase 3
M1	UP	Sowahc	Q8C0J6	sosondowah ankyrin repeat domain family member C
M1	UP	Pla2g4a	P47713	phospholipase A2, group IVA (cytosolic, calcium-dependent)
M1	UP	Ppp1r12a	Q9DBR7	protein phosphatase 1, regulatory (inhibitor) subunit 12A
M1	UP	Tpm4	Q6IRU2	tropomyosin 4
M1	UP	Ociad1	Q9CRD0	OCIA domain containing 1
M1	UP	Rrbp1	Q99PL5	ribosome binding protein 1
M1	UP	Srxn1	Q9D975	sulfiredoxin 1 homolog (S. cerevisiae)
M1	UP	NA	P06537	NA
M1	UP	Hspa8	P63017	heat shock protein 8
M1	UP	M6pr	P24668	mannose-6-phosphate receptor, cation dependent
M1	UP	Map4	P27546	microtubule-associated protein 4
M1	UP	Limd2	Q8BGB5	LIM domain containing 2
M1	UP	Saraf	Q8R3Q0	store-operated calcium entry-associated regulatory factor
M1	UP	Cpd	O89001	carboxypeptidase D
M1	UP	Rap1b	Q99JI6	RAS related protein 1b
M1	UP	Arf4	P61750	ADP-ribosylation factor 4
M1	UP	Plekhf2	Q91WB4	pleckstrin homology domain containing, family F (with FYVE domain) member 2
M1	UP	Txnrd1	Q9JMH6	thioredoxin reductase 1
M1	UP	Abcc1	O35379	ATP-binding cassette, sub-family C (CFTR/MRP), member 1
M1	UP	Hsp90ab1	P11499	heat shock protein 90 alpha (cytosolic), class B member 1
M1	UP	Srgap2	Q91Z67	SLIT-ROBO Rho GTPase activating protein 2
M1	UP	Plscr1	Q9JJ00	phospholipid scramblase 1
M1	UP	NA	Q8C0J2-3	NA
M1	UP	Taok3	Q8BYC6	TAO kinase 3
M1	UP	AI837181	Q8VD62	expressed sequence AI837181
M1	UP	Nufip2	Q5F2E7	nuclear fragile X mental retardation protein interacting protein 2
M1	UP	Psd4	Q8BLR5	pleckstrin and Sec7 domain containing 4
M1	UP	Prrc2c	Q3TLH4	proline-rich coiled-coil 2C
M1	UP	Actb	P60710	actin, beta
M1	UP	Smcr8	Q3UMB5	Smith-Magenis syndrome chromosome region, candidate 8 homolog (human)
M1	UP	Tmem106a	Q8VC04	transmembrane protein 106A
M1	UP	Diaph2	O70566	diaphanous related formin 2
M1	UP	Ttc9c	Q810A3	tetratricopeptide repeat domain 9C
M1	UP	Dpysl2	O08553	dihydropyrimidinase-like 2
M1	UP	Dnajc7	Q9QYI3	DnaJ heat shock protein family (Hsp40) member C7
M1	UP	Naip2	Q9QUK4	NLR family, apoptosis inhibitory protein 2
M1	UP	NA	Q5RJH6-2	NA
M1	UP	Ghitm	Q91VC9	growth hormone inducible transmembrane protein
M1	UP	Samsn1	P57725	SAM domain, SH3 domain and nuclear localization signals, 1
M1	UP	Sumf1	Q8R0F3	sulfatase modifying factor 1
M1	UP	Sco1	Q5SUC9	SCO1 cytochrome c oxidase assembly protein
M1	UP	Acsl5	Q8JZR0	acyl-CoA synthetase long-chain family member 5
M1	UP	Ube2q1	Q7TSS2	ubiquitin-conjugating enzyme E2Q family member 1
M1	UP	Ube2j1	Q9JJZ4	ubiquitin-conjugating enzyme E2J 1
M1	UP	Sdf2	Q9DCT5	stromal cell derived factor 2
M1	UP	Pafah1b1	P63005	platelet-activating factor acetylhydrolase, isoform 1b, subunit 1
M1	UP	Dock4	P59764	dedicator of cytokinesis 4
M1	UP	Ezr	P26040	ezrin
M1	UP	Msn	P26041	moesin
M1	UP	Vrk2	Q8BN21	vaccinia related kinase 2
M1	UP	Lcp1	Q61233	lymphocyte cytosolic protein 1
M1	UP	Eloa	Q8CB77	elongin A
M1	UP	Hmox2	O70252	heme oxygenase 2
M1	UP	Ripk2	P58801	receptor (TNFRSF)-interacting serine-threonine kinase 2
M1	UP	Gng12	Q9DAS9	guanine nucleotide binding protein (G protein), gamma 12
M1	UP	Uba1	Q02053	ubiquitin-like modifier activating enzyme 1
M1	UP	Trim25	Q61510	tripartite motif-containing 25
M1	UP	Stard5	Q9EPQ7	StAR-related lipid transfer (START) domain containing 5
M1	UP	Ankfy1	Q810B6	ankyrin repeat and FYVE domain containing 1
M1	UP	Dok3	Q9QZK7	docking protein 3
M1	UP	NA	Q69ZR2	NA
M1	UP	Ranbp2	Q9ERU9	RAN binding protein 2
M1	UP	Iqsec2	Q5DU25	IQ motif and Sec7 domain 2
M1	UP	Hsp90aa1	P07901	heat shock protein 90, alpha (cytosolic), class A member 1
M1	UP	NA	P29351-2	NA
M1	UP	Ctsc	P97821	cathepsin C
M1	UP	Nkiras2	Q9CR56	NFKB inhibitor interacting Ras-like protein 2
M1	UP	Smap1	Q91VZ6	small ArfGAP 1
M1	UP	Ppp2r2a	Q6P1F6	protein phosphatase 2, regulatory subunit B, alpha
M1	UP	Mocos	Q14CH1	molybdenum cofactor sulfurase
M1	UP	Caprin1	Q60865	cell cycle associated protein 1
M1	UP	Lrrc59	Q922Q8	leucine rich repeat containing 59
M1	UP	Grb2	Q60631	growth factor receptor bound protein 2
M1	UP	Hspa5	P20029	heat shock protein 5
M1	UP	Slc25a12	Q8BH59	solute carrier family 25 (mitochondrial carrier, Aralar), member 12
M1	UP	NA	P06800	NA
M1	UP	Acp2	P24638	acid phosphatase 2, lysosomal
M1	UP	Gfpt1	P47856	glutamine fructose-6-phosphate transaminase 1
M1	UP	Etf1	Q8BWY3	eukaryotic translation termination factor 1
M1	UP	Ppp2cb	P62715	protein phosphatase 2 (formerly 2A), catalytic subunit, beta isoform
M1	UP	Rftn1	Q6A0D4	raftlin lipid raft linker 1
M1	UP	Ppp2r1a	Q76MZ3	protein phosphatase 2, regulatory subunit A, alpha
M1	UP	Riox2	Q8CD15	ribosomal oxygenase 2
M1	UP	Rbms1	Q91W59	RNA binding motif, single stranded interacting protein 1
M1	UP	Dnajb1	Q9QYJ3	DnaJ heat shock protein family (Hsp40) member B1
M1	UP	Psmd2	Q8VDM4	proteasome (prosome, macropain) 26S subunit, non-ATPase, 2
M1	UP	Usp4	P35123	ubiquitin specific peptidase 4 (proto-oncogene)
M1	UP	Lats1	Q8BYR2	large tumor suppressor
M1	UP	Nrp2	O35375	neuropilin 2
M1	UP	NA	Q6NZC7	NA
M1	UP	Cndp2	Q9D1A2	CNDP dipeptidase 2 (metallopeptidase M20 family)
M1	UP	Wdr1	O88342	WD repeat domain 1
M1	UP	Ywhag	P61982	tyrosine 3-monooxygenase/tryptophan 5-monooxygenase activation protein, gamma polypeptide
M1	UP	NA	P15307	NA
M1	UP	Eif6	O55135	eukaryotic translation initiation factor 6
M1	UP	Rexo4	Q6PAQ4	REX4, 3'-5' exonuclease
M1	UP	Cep170	Q6A065	centrosomal protein 170
M1	UP	NA	Q9Z0H8-2	NA
M1	UP	Wars	P32921	tryptophanyl-tRNA synthetase
M1	UP	Lrrfip2	Q91WK0	leucine rich repeat (in FLII) interacting protein 2
M1	UP	Plcb3	P51432	phospholipase C, beta 3
M1	UP	NA	P47226	NA
M1	UP	Galnt7	Q80VA0	polypeptide N-acetylgalactosaminyltransferase 7
M1	UP	Arcn1	Q5XJY5	archain 1
M1	UP	Sh3glb1	Q9JK48	SH3-domain GRB2-like B1 (endophilin)
M1	UP	Pdcl3	Q8BVF2	phosducin-like 3
M1	UP	Apool	Q78IK4	apolipoprotein O-like
M1	DOWN	Nusap1	Q9ERH4	nucleolar and spindle associated protein 1
M1	DOWN	Pclaf	Q9CQX4	PCNA clamp associated factor
M1	DOWN	Trem2	Q99NH8	triggering receptor expressed on myeloid cells 2
M1	DOWN	Hmmr	Q00547	hyaluronan mediated motility receptor (RHAMM)
M1	DOWN	Rrm2	P11157	ribonucleotide reductase M2
M1	DOWN	Asf1b	Q9DAP7	anti-silencing function 1B histone chaperone
M1	DOWN	Prc1	Q99K43	protein regulator of cytokinesis 1
M1	DOWN	Fdx1l	Q9CPW2	ferredoxin 1-like
M1	DOWN	Tk1	P04184	thymidine kinase 1
M1	DOWN	Tlr4	Q9QUK6	toll-like receptor 4
M1	DOWN	Pdcd4	Q61823	programmed cell death 4
M1	DOWN	Cd300lb	Q3U497	CD300 molecule like family member B
M1	DOWN	Pdcd11	Q6NS46	programmed cell death 11
M1	DOWN	Cyp51	Q8K0C4	cytochrome P450, family 51
M1	DOWN	Lrp6	O88572	low density lipoprotein receptor-related protein 6
M1	DOWN	Mki67	E9PVX6	antigen identified by monoclonal antibody Ki 67
M1	DOWN	Rsl1d1	Q8BVY0	ribosomal L1 domain containing 1
M1	DOWN	Ube2c	Q9D1C1	ubiquitin-conjugating enzyme E2C
M1	DOWN	c("Hbb-b1", "Hbb-bs", "Hbb-bt")	P02088	c("hemoglobin, beta adult major chain", "hemoglobin, beta adult s chain", "hemoglobin, beta adult t chain")
M1	DOWN	Ndufa4	Q62425	NADH dehydrogenase (ubiquinone) 1 alpha subcomplex, 4
M1	DOWN	Fdx1	P46656	ferredoxin 1
M1	DOWN	Kpna2	P52293	karyopherin (importin) alpha 2
M1	DOWN	Slc29a1	Q9JIM1	solute carrier family 29 (nucleoside transporters), member 1
M1	DOWN	Plxdc1	Q91ZV7	plexin domain containing 1
M1	DOWN	Serinc3	Q9QZI9	serine incorporator 3
M1	DOWN	NA	Q99J99	NA
M1	DOWN	Cdk4	P30285	cyclin-dependent kinase 4
M1	DOWN	Uhrf1	Q8VDF2	ubiquitin-like, containing PHD and RING finger domains, 1
M1	DOWN	Spc25	Q3UA16	SPC25, NDC80 kinetochore complex component, homolog (S. cerevisiae)
M1	DOWN	Far1	Q922J9	fatty acyl CoA reductase 1
M1	DOWN	Hfe	P70387	hemochromatosis
M1	DOWN	Ndufa2	Q9CQ75	NADH dehydrogenase (ubiquinone) 1 alpha subcomplex, 2
M1	DOWN	Chaf1a	Q9QWF0	chromatin assembly factor 1, subunit A (p150)
M1	DOWN	Kif11	Q6P9P6	kinesin family member 11
M1	DOWN	Ndufs1	Q91VD9	NADH dehydrogenase (ubiquinone) Fe-S protein 1
M1	DOWN	Gga2	Q6P5E6	golgi associated, gamma adaptin ear containing, ARF binding protein 2
M1	DOWN	Incenp	Q9WU62	inner centromere protein
M1	DOWN	Csf1r	P09581	colony stimulating factor 1 receptor
M1	DOWN	Adam10	O35598	a disintegrin and metallopeptidase domain 10
M1	DOWN	Kif2c	Q922S8	kinesin family member 2C
M1	DOWN	Ctsl	P06797	cathepsin L
M1	DOWN	Rab3il1	Q8VDV3	RAB3A interacting protein (rabin3)-like 1
M1	DOWN	Cd9	P40240	CD9 antigen
M1	DOWN	Ccr5	P51682	chemokine (C-C motif) receptor 5
M1	DOWN	Ndufa7	Q9Z1P6	NADH dehydrogenase (ubiquinone) 1 alpha subcomplex, 7 (B14.5a)
M1	DOWN	Cd37	Q61470	CD37 antigen
M1	DOWN	Sdhb	Q9CQA3	succinate dehydrogenase complex, subunit B, iron sulfur (Ip)
M1	DOWN	Lrrc58	Q3UGP9	leucine rich repeat containing 58
M1	DOWN	Zdhhc14	Q8BQQ1	zinc finger, DHHC domain containing 14
M1	DOWN	Ndufs6	P52503	NADH dehydrogenase (ubiquinone) Fe-S protein 6
M1	DOWN	Dhrs3	O88876	dehydrogenase/reductase (SDR family) member 3
M1	DOWN	Ndufv2	Q9D6J6	NADH dehydrogenase (ubiquinone) flavoprotein 2
M1	DOWN	Etfdh	Q921G7	electron transferring flavoprotein, dehydrogenase
M1	DOWN	Cd28	P31041	CD28 antigen
M1	DOWN	Abcd1	P48410	ATP-binding cassette, sub-family D (ALD), member 1
M1	DOWN	Zfp36l2	P23949	zinc finger protein 36, C3H type-like 2
M1	DOWN	Tpx2	A2APB8	TPX2, microtubule-associated
M1	DOWN	NA	Q8R4Y4	NA
M1	DOWN	NA	P29391	NA
M1	DOWN	Chek2	Q9Z265	checkpoint kinase 2
M1	DOWN	Tdp2	Q9JJX7	tyrosyl-DNA phosphodiesterase 2
M1	DOWN	Plxnd1	Q3UH93	plexin D1
M1	DOWN	Man1a	P45700	mannosidase 1, alpha
M1	DOWN	Cdk18	Q04899	cyclin-dependent kinase 18
M1	DOWN	Ndufs3	Q9DCT2	NADH dehydrogenase (ubiquinone) Fe-S protein 3
M1	DOWN	Aco2	Q99KI0	aconitase 2, mitochondrial
M1	DOWN	Pwp2	Q8BU03	PWP2 periodic tryptophan protein homolog (yeast)
M1	DOWN	Scarb1	Q61009	scavenger receptor class B, member 1
M1	DOWN	Adi1	Q99JT9	acireductone dioxygenase 1
M1	DOWN	Ndufs8	Q8K3J1	NADH dehydrogenase (ubiquinone) Fe-S protein 8
M1	DOWN	NA	Q9JJ11	NA
M1	DOWN	Ndc80	Q9D0F1	NDC80 kinetochore complex component
M1	DOWN	Lyz2	P08905	lysozyme 2
M1	DOWN	NA	P01942	NA
M1	DOWN	NA	P22315	NA
M1	DOWN	Polr2b	Q8CFI7	polymerase (RNA) II (DNA directed) polypeptide B
M1	DOWN	Pla2g15	Q8VEB4	phospholipase A2, group XV
M1	DOWN	Acot13	Q9CQR4	acyl-CoA thioesterase 13
M1	DOWN	Tbc1d17	Q8BYH7	TBC1 domain family, member 17
M1	DOWN	Cdk1	P11440	cyclin-dependent kinase 1
M1	DOWN	Nat10	Q8K224	N-acetyltransferase 10
M1	DOWN	Card10	P58660	caspase recruitment domain family, member 10
M1	DOWN	C1qc	Q02105	complement component 1, q subcomponent, C chain
M1	DOWN	Cd300a	Q6SJQ0	CD300A molecule
M1	DOWN	Cuedc2	Q9CXX9	CUE domain containing 2
M1	DOWN	Irf2bp2	E9Q1P8	interferon regulatory factor 2 binding protein 2
M1	DOWN	Zfp706	Q9D115	zinc finger protein 706
M1	DOWN	Sdhc	Q9CZB0	succinate dehydrogenase complex, subunit C, integral membrane protein
M1	DOWN	Baiap2	Q8BKX1	brain-specific angiogenesis inhibitor 1-associated protein 2
M1	DOWN	Sqor	Q9R112	sulfide quinone oxidoreductase
M1	DOWN	Ndufa10	Q99LC3	NADH dehydrogenase (ubiquinone) 1 alpha subcomplex 10
M1	DOWN	C330027C09Rik	Q8BWY9	RIKEN cDNA C330027C09 gene
M1	DOWN	Polr2f	P61219	polymerase (RNA) II (DNA directed) polypeptide F
M1	DOWN	Dag1	Q62165	dystroglycan 1
M1	DOWN	NA	P08508	NA
M1	DOWN	Mtss1	Q8R1S4	metastasis suppressor 1
M1	DOWN	Rars2	Q3U186	arginyl-tRNA synthetase 2, mitochondrial
M1	DOWN	Mpp6	Q9JLB0	membrane protein, palmitoylated 6 (MAGUK p55 subfamily member 6)
M1	DOWN	Mtr	A6H5Y3	5-methyltetrahydrofolate-homocysteine methyltransferase
M1	DOWN	Rcbtb2	Q99LJ7	regulator of chromosome condensation (RCC1) and BTB (POZ) domain containing protein 2
M1	DOWN	Mrpl28	Q9D1B9	mitochondrial ribosomal protein L28
M1	DOWN	Cep55	Q8BT07	centrosomal protein 55
M1	DOWN	Acadm	P45952	acyl-Coenzyme A dehydrogenase, medium chain
M1	DOWN	Cst3	P21460	cystatin C
M1	DOWN	Tpp1	O89023	tripeptidyl peptidase I
M1	DOWN	Atxn3	Q9CVD2	ataxin 3
M1	DOWN	Mrps26	Q80ZS3	mitochondrial ribosomal protein S26
M1	DOWN	Cks1b	P61025	CDC28 protein kinase 1b
M1	DOWN	Laptm5	Q61168	lysosomal-associated protein transmembrane 5
M1	DOWN	Rasal3	Q8C2K5	RAS protein activator like 3
M1	DOWN	Sash3	Q8K352	SAM and SH3 domain containing 3
M1	DOWN	Itgb5	O70309	integrin beta 5
M1	DOWN	Irak4	Q8R4K2	interleukin-1 receptor-associated kinase 4
M1	DOWN	Snap47	Q8R570	synaptosomal-associated protein, 47
M1	DOWN	Lrmp	Q60664	lymphoid-restricted membrane protein
M1	DOWN	Zfand6	Q9DCH6	zinc finger, AN1-type domain 6
M1	DOWN	Plau	P06869	plasminogen activator, urokinase
M1	DOWN	Abcd2	Q61285	ATP-binding cassette, sub-family D (ALD), member 2
M1	DOWN	Cox7a2	P48771	cytochrome c oxidase subunit VIIa 2
M1	DOWN	Abce1	P61222	ATP-binding cassette, sub-family E (OABP), member 1
M1	DOWN	Tmem87a	Q8BXN9	transmembrane protein 87A
M1	DOWN	Cd63	P41731	CD63 antigen
M1	DOWN	Chst12	Q99LL3	carbohydrate sulfotransferase 12
M1	DOWN	Slc27a1	Q60714	solute carrier family 27 (fatty acid transporter), member 1
M1	DOWN	Steap3	Q8CI59	STEAP family member 3
M1	DOWN	Wdr12	Q9JJA4	WD repeat domain 12
M1	DOWN	Snx8	Q8CFD4	sorting nexin 8
M1	DOWN	Rgs10	Q9CQE5	regulator of G-protein signalling 10
M1	DOWN	Isyna1	Q9JHU9	myo-inositol 1-phosphate synthase A1
M1	DOWN	Fadd	Q61160	Fas (TNFRSF6)-associated via death domain
M1	DOWN	Rpa3	Q9CQ71	replication protein A3
M1	DOWN	Snx9	Q91VH2	sorting nexin 9
M1	DOWN	Sort1	Q6PHU5	sortilin 1
M1	DOWN	Ndufs5	Q99LY9	NADH dehydrogenase (ubiquinone) Fe-S protein 5
M1	DOWN	Pex5	O09012	peroxisomal biogenesis factor 5
M1	DOWN	Coq9	Q8K1Z0	coenzyme Q9
M1	DOWN	Dnajc9	Q91WN1	DnaJ heat shock protein family (Hsp40) member C9
M1	DOWN	Tbl3	Q8C4J7	transducin (beta)-like 3
M1	DOWN	Gsto1	O09131	glutathione S-transferase omega 1
M1	DOWN	Folr2	Q05685	folate receptor 2 (fetal)
M1	DOWN	Mmp12	P34960	matrix metallopeptidase 12
M1	DOWN	Scp2	P32020	sterol carrier protein 2, liver
M1	DOWN	Acbd5	Q5XG73	acyl-Coenzyme A binding domain containing 5
M1	DOWN	Mapkapk3	Q3UMW7	mitogen-activated protein kinase-activated protein kinase 3
M1	DOWN	Galc	P54818	galactosylceramidase
M1	DOWN	Manba	Q8K2I4	mannosidase, beta A, lysosomal
M1	DOWN	Def6	Q8C2K1	differentially expressed in FDCP 6
M1	DOWN	Dip2b	Q3UH60	disco interacting protein 2 homolog B
M1	DOWN	Pgap1	Q3UUQ7	post-GPI attachment to proteins 1
M1	DOWN	NA	P19536	NA
M1	DOWN	Lgmn	O89017	legumain
M1	DOWN	Snca	O55042	synuclein, alpha
M1	DOWN	Acaa2	Q8BWT1	acetyl-Coenzyme A acyltransferase 2 (mitochondrial 3-oxoacyl-Coenzyme A thiolase)
M1	DOWN	Mrpl14	Q9D1I6	mitochondrial ribosomal protein L14
M1	DOWN	Mtmr1	Q9Z2C4	myotubularin related protein 1
M1	DOWN	Gamt	O35969	guanidinoacetate methyltransferase
M1	DOWN	Elmo2	Q8BHL5	engulfment and cell motility 2
M1	DOWN	Pold1	P52431	polymerase (DNA directed), delta 1, catalytic subunit
M1	DOWN	Pcyt1a	P49586	phosphate cytidylyltransferase 1, choline, alpha isoform
M1	DOWN	Stmn1	P54227	stathmin 1
M1	DOWN	D8Ertd738e	Q8R1F0	DNA segment, Chr 8, ERATO Doi 738, expressed
M1	DOWN	c("Idi1", "Gm38481")	P58044	c("isopentenyl-diphosphate delta isomerase", "predicted gene, 38481")
M1	DOWN	Adcy7	P51829	adenylate cyclase 7
M1	DOWN	Hars2	Q99KK9	histidyl-tRNA synthetase 2
M1	DOWN	Mrpl40	Q9Z2Q5	mitochondrial ribosomal protein L40
M1	DOWN	Pcp4l1	Q6W8Q3	Purkinje cell protein 4-like 1
M1	DOWN	NA	Q03347	NA
M1	DOWN	Hadhb	Q99JY0	hydroxyacyl-Coenzyme A dehydrogenase/3-ketoacyl-Coenzyme A thiolase/enoyl-Coenzyme A hydratase (trifunctional protein), beta subunit
M1	DOWN	Apoe	P08226	apolipoprotein E
M1	DOWN	Rbm28	Q8CGC6	RNA binding motif protein 28
M1	DOWN	Polr2e	Q80UW8	polymerase (RNA) II (DNA directed) polypeptide E
M1	DOWN	Slc37a2	Q9WU81	solute carrier family 37 (glycerol-3-phosphate transporter), member 2
M1	DOWN	Dlgap5	Q8K4R9	DLG associated protein 5
M1	DOWN	Smad2	Q62432	SMAD family member 2
M1	DOWN	Hexa	P29416	hexosaminidase A
M1	DOWN	Wdr81	Q5ND34	WD repeat domain 81
M1	DOWN	Rassf2	Q8BMS9	Ras association (RalGDS/AF-6) domain family member 2
M1	DOWN	Glrx5	Q80Y14	glutaredoxin 5
M1	DOWN	Atp6v0a1	Q9Z1G4	ATPase, H+ transporting, lysosomal V0 subunit A1
M1	DOWN	Sfxn3	Q91V61	sideroflexin 3
M1	DOWN	Utp3	Q9JI13	UTP3 small subunit processome component
M1	DOWN	Suclg2	Q9Z2I8	succinate-Coenzyme A ligase, GDP-forming, beta subunit
M1	DOWN	Ndufaf1	Q9CWX2	NADH dehydrogenase (ubiquinone) 1 alpha subcomplex, assembly factor 1
M1	DOWN	NA	P51912	NA
M1	DOWN	Mrps34	Q9JIK9	mitochondrial ribosomal protein S34
M1	DOWN	Mrpl51	Q9CPY1	mitochondrial ribosomal protein L51
M1	DOWN	Nucb1	Q02819	nucleobindin 1
M1	DOWN	Egln1	Q91YE3	egl-9 family hypoxia-inducible factor 1
M1	DOWN	Dnase2a	P56542	deoxyribonuclease II alpha
M1	DOWN	NA	P31748	NA
M1	DOWN	Plekhm1	Q7TSI1	pleckstrin homology domain containing, family M (with RUN domain) member 1
M1	DOWN	Mpv17	P19258	MpV17 mitochondrial inner membrane protein
M1	DOWN	Coa7	Q921H9	cytochrome c oxidase assembly factor 7
M1	DOWN	Dennd4c	A6H8H2	DENN/MADD domain containing 4C
M1	DOWN	Oxr1	Q4KMM3	oxidation resistance 1
M1	DOWN	Gnpda1	O88958	glucosamine-6-phosphate deaminase 1
M1	DOWN	Qk	Q9QYS9	quaking
M1	DOWN	Add3	Q9QYB5	adducin 3 (gamma)
M1	DOWN	Elp3	Q9CZX0	elongator acetyltransferase complex subunit 3
M1	DOWN	Acat1	Q8QZT1	acetyl-Coenzyme A acetyltransferase 1
M1	DOWN	Ttc33	Q9D6K7	tetratricopeptide repeat domain 33
M1	DOWN	Pccb	Q99MN9	propionyl Coenzyme A carboxylase, beta polypeptide
M1	DOWN	Inpp5d	Q9ES52	inositol polyphosphate-5-phosphatase D
M1	DOWN	NA	P50136	NA
M1	DOWN	Nop58	Q6DFW4	NOP58 ribonucleoprotein
M1	DOWN	Got1	P05201	glutamic-oxaloacetic transaminase 1, soluble
M1	DOWN	Triap1	Q9D8Z2	TP53 regulated inhibitor of apoptosis 1
M1	DOWN	Tma7	Q8K003	translational machinery associated 7
M1	DOWN	Gusb	P12265	glucuronidase, beta
M1	DOWN	Snx5	Q9D8U8	sorting nexin 5
M1	DOWN	Crat	P47934	carnitine acetyltransferase
M1	DOWN	Mrpl46	Q9EQI8	mitochondrial ribosomal protein L46
M1	DOWN	Gm2a	Q60648	GM2 ganglioside activator protein
M1	DOWN	Sc5d	O88822	sterol-C5-desaturase
M1	DOWN	Pdxk	Q8K183	pyridoxal (pyridoxine, vitamin B6) kinase
M1	DOWN	Gpnmb	Q99P91	glycoprotein (transmembrane) nmb
M1	DOWN	Sdhaf4	Q8BTE0	succinate dehydrogenase complex assembly factor 4
M1	DOWN	Arhgef6	Q8K4I3	Rac/Cdc42 guanine nucleotide exchange factor (GEF) 6
M1	DOWN	Arl4c	P61208	ADP-ribosylation factor-like 4C
M1	DOWN	Actn1	Q7TPR4	actinin, alpha 1
M1	DOWN	Cd200r1	Q9ES57	CD200 receptor 1
M1	DOWN	Slc17a5	Q8BN82	solute carrier family 17 (anion/sugar transporter), member 5
M1	DOWN	Cox7c	P17665	cytochrome c oxidase subunit VIIc
M1	DOWN	NA	P70248	NA
M1	DOWN	C5ar1	P30993	complement component 5a receptor 1
M1	DOWN	Rab11fip5	Q8R361	RAB11 family interacting protein 5 (class I)
M1	DOWN	Tmlhe	Q91ZE0	trimethyllysine hydroxylase, epsilon
M1	DOWN	Acad8	Q9D7B6	acyl-Coenzyme A dehydrogenase family, member 8
M1	DOWN	Hint2	Q9D0S9	histidine triad nucleotide binding protein 2
M1	DOWN	NA	P16110	NA
M1	DOWN	Pnkd	Q69ZP3	paroxysmal nonkinesiogenic dyskinesia
M1	DOWN	Cetn2	Q9R1K9	centrin 2
M1	DOWN	Acox3	Q9EPL9	acyl-Coenzyme A oxidase 3, pristanoyl
M1	DOWN	Snx17	Q8BVL3	sorting nexin 17
M1	DOWN	Comt	O88587	catechol-O-methyltransferase
M1	DOWN	Agfg2	Q80WC7	ArfGAP with FG repeats 2
M1	DOWN	Cd93	O89103	CD93 antigen
M1	DOWN	Acadvl	P50544	acyl-Coenzyme A dehydrogenase, very long chain
M1	DOWN	Lrp1	Q91ZX7	low density lipoprotein receptor-related protein 1
M1	DOWN	Isoc2a	P85094	isochorismatase domain containing 2a
M1	DOWN	Ak3	Q9WTP7	adenylate kinase 3
M1	DOWN	Cd36	Q08857	CD36 molecule
M1	DOWN	Dpp7	Q9ET22	dipeptidylpeptidase 7
M1	DOWN	Lrpprc	Q6PB66	leucine-rich PPR-motif containing
M1	DOWN	Nfam1	Q8R4V1	Nfat activating molecule with ITAM motif 1
M1	DOWN	Ttc7	Q8BGB2	tetratricopeptide repeat domain 7
M1	DOWN	Rps6ka1	P18653	ribosomal protein S6 kinase polypeptide 1
M1	DOWN	Fmnl1	Q9JL26	formin-like 1
M1	DOWN	NA	P11103	NA
M1	DOWN	Lrch4	Q921G6	leucine-rich repeats and calponin homology (CH) domain containing 4
M1	DOWN	Mrps28	Q9CY16	mitochondrial ribosomal protein S28
M1	DOWN	Pex11b	Q9Z210	peroxisomal biogenesis factor 11 beta
M1	DOWN	Cd300ld3	Q6SJQ5	CD300 molecule like family member D3
M1	DOWN	Idh1	O88844	isocitrate dehydrogenase 1 (NADP+), soluble
M1	DOWN	Acads	Q07417	acyl-Coenzyme A dehydrogenase, short chain
M1	DOWN	Cdkn2c	Q60772	cyclin-dependent kinase inhibitor 2C (p18, inhibits CDK4)
M1	DOWN	Anapc1	P53995	anaphase promoting complex subunit 1
M1	DOWN	Fam213a	Q9CYH2	family with sequence similarity 213, member A
M1	DOWN	Snapin	Q9Z266	SNAP-associated protein
M1	DOWN	Agk	Q9ESW4	acylglycerol kinase
M1	DOWN	Ethe1	Q9DCM0	ethylmalonic encephalopathy 1
M1	DOWN	Cdk2	P97377	cyclin-dependent kinase 2
M1	DOWN	Ndufa3	Q9CQ91	NADH dehydrogenase (ubiquinone) 1 alpha subcomplex, 3
M1	DOWN	Mrpl3	Q99N95	mitochondrial ribosomal protein L3
M1	DOWN	NA	Q64105	NA
M1	DOWN	Mycbp2	Q7TPH6	MYC binding protein 2
M1	DOWN	Yy1	Q00899	YY1 transcription factor
M1	DOWN	Rfc4	Q99J62	replication factor C (activator 1) 4
M1	DOWN	Galm	Q8K157	galactose mutarotase
M1	DOWN	Aco1	P28271	aconitase 1
M1	DOWN	Nob1	Q8BW10	NIN1/RPN12 binding protein 1 homolog
M1	DOWN	Bop1	P97452	block of proliferation 1
M1	DOWN	Man2b1	O09159	mannosidase 2, alpha B1
M1	DOWN	Gltp	Q9JL62	glycolipid transfer protein
M1	DOWN	Dhx30	Q99PU8	DEAH (Asp-Glu-Ala-His) box polypeptide 30
M1	DOWN	Pgp	Q8CHP8	phosphoglycolate phosphatase
M1	DOWN	Fdps	Q920E5	farnesyl diphosphate synthetase
M1	DOWN	Exosc7	Q9D0M0	exosome component 7
M1	DOWN	Bmp2k	Q91Z96	BMP2 inducible kinase
M1	DOWN	Cdk17	Q8K0D0	cyclin-dependent kinase 17
M1	DOWN	Sumo3	Q9Z172	small ubiquitin-like modifier 3
M1	DOWN	Ctsb	P10605	cathepsin B
M1	DOWN	Coro1c	Q9WUM4	coronin, actin binding protein 1C
M1	DOWN	Ctbs	Q8R242	chitobiase, di-N-acetyl-
M1	DOWN	Ddi2	A2ADY9	DNA-damage inducible protein 2
M1	DOWN	Atraid	Q6PGD0	all-trans retinoic acid induced differentiation factor
M1	DOWN	Rasa3	Q60790	RAS p21 protein activator 3
M1	DOWN	NA	P39749	NA
M1	DOWN	Nav1	Q8CH77	neuron navigator 1
M1	DOWN	NA	Q00558	NA
M1	DOWN	Aldh6a1	Q9EQ20	aldehyde dehydrogenase family 6, subfamily A1
M1	DOWN	Gpd1l	Q3ULJ0	glycerol-3-phosphate dehydrogenase 1-like
M1	DOWN	Ifi30	Q9ESY9	interferon gamma inducible protein 30
M1	DOWN	Ptpa	P58389	protein phosphatase 2 protein activator
M1	DOWN	Entpd1	P55772	ectonucleoside triphosphate diphosphohydrolase 1
M1	DOWN	Mvd	Q99JF5	mevalonate (diphospho) decarboxylase
M1	DOWN	Echs1	Q8BH95	enoyl Coenzyme A hydratase, short chain, 1, mitochondrial
M1	DOWN	S100a4	P07091	S100 calcium binding protein A4
M1	DOWN	Arhgap45	Q3TBD2	Rho GTPase activating protein 45
M1	DOWN	Fam126a	Q6P9N1	family with sequence similarity 126, member A
M1	DOWN	Fdxr	Q61578	ferredoxin reductase
M1	DOWN	Memo1	Q91VH6	mediator of cell motility 1
M1	DOWN	Ate1	Q9Z2A5	arginyltransferase 1
M1	DOWN	Tecr	Q9CY27	trans-2,3-enoyl-CoA reductase
M1	DOWN	c("Evi2b", "Evi2")	Q8VD58	c("ecotropic viral integration site 2b", "ecotropic viral integration site 2")
M1	DOWN	NA	P0DN34	NA
M1	DOWN	Man2b2	O54782	mannosidase 2, alpha B2
M1	DOWN	Vwa8	Q8CC88	von Willebrand factor A domain containing 8
M1	DOWN	Itgb2	P11835	integrin beta 2
M1	DOWN	Tgfbrap1	Q3UR70	transforming growth factor, beta receptor associated protein 1
M1	DOWN	Ppcs	Q8VDG5	phosphopantothenoylcysteine synthetase
M1	DOWN	Msh2	P43247	mutS homolog 2
M1	DOWN	Hnmt	Q91VF2	histamine N-methyltransferase
M1	DOWN	Sumo2	P61957	small ubiquitin-like modifier 2
M1	DOWN	Apex1	P28352	apurinic/apyrimidinic endonuclease 1
M1	DOWN	Mdh1	P14152	malate dehydrogenase 1, NAD (soluble)
M1	DOWN	Gpr108	Q91WD0	G protein-coupled receptor 108
M1	DOWN	Mrps22	Q9CXW2	mitochondrial ribosomal protein S22
M1	DOWN	Usp8	Q80U87	ubiquitin specific peptidase 8
M1	DOWN	Ap1s2	Q9DB50	adaptor-related protein complex 1, sigma 2 subunit
M1	DOWN	Tbxas1	P36423	thromboxane A synthase 1, platelet
M1	DOWN	Lancl1	O89112	LanC (bacterial lantibiotic synthetase component C)-like 1
M1	DOWN	Mrpl12	Q9DB15	mitochondrial ribosomal protein L12
M1	DOWN	Dtymk	P97930	deoxythymidylate kinase
M1	DOWN	Cc2d1b	Q8BRN9	coiled-coil and C2 domain containing 1B
M1	DOWN	Mrpl20	Q9CQL4	mitochondrial ribosomal protein L20
M1	DOWN	Arhgap15	Q811M1	Rho GTPase activating protein 15
M1	DOWN	Nudt2	P56380	nudix (nucleoside diphosphate linked moiety X)-type motif 2
M1	DOWN	Adam15	O88839	a disintegrin and metallopeptidase domain 15 (metargidin)
M1	DOWN	Pcca	Q91ZA3	propionyl-Coenzyme A carboxylase, alpha polypeptide
M1	DOWN	Cnpy2	Q9QXT0	canopy FGF signaling regulator 2
M1	DOWN	Cox4i1	P19783	cytochrome c oxidase subunit 4I1
M1	DOWN	NA	O70492	NA
M1	DOWN	Cpox	P36552	coproporphyrinogen oxidase
M1	DOWN	Aacs	Q9D2R0	acetoacetyl-CoA synthetase
M1	DOWN	Cdk9	Q99J95	cyclin-dependent kinase 9 (CDC2-related kinase)
M1	DOWN	P2rx7	Q9Z1M0	purinergic receptor P2X, ligand-gated ion channel, 7
M1	DOWN	Fam105a	Q3TVP5	family with sequence similarity 105, member A
M1	DOWN	Pck2	Q8BH04	phosphoenolpyruvate carboxykinase 2 (mitochondrial)
M1	DOWN	Trove2	O08848	TROVE domain family, member 2
M1	DOWN	Aldh2	P47738	aldehyde dehydrogenase 2, mitochondrial
M1	DOWN	Slc25a13	Q9QXX4	solute carrier family 25 (mitochondrial carrier, adenine nucleotide translocator), member 13
M1	DOWN	Asrgl1	Q8C0M9	asparaginase like 1
M1	DOWN	Dhodh	O35435	dihydroorotate dehydrogenase
M1	DOWN	Gdap2	Q9DBL2	ganglioside-induced differentiation-associated-protein 2
M1	DOWN	Nup62	Q63850	nucleoporin 62
M1	DOWN	Uevld	Q3U1V6	UEV and lactate/malate dehyrogenase domains
M1	DOWN	Tec	P24604	tec protein tyrosine kinase
M1	DOWN	Ssna1	Q9JJ94	SS nuclear autoantigen 1
M1	DOWN	Lactb	Q9EP89	lactamase, beta
M1	DOWN	Hirip3	Q8BLH7	HIRA interacting protein 3
M1	DOWN	Anp32e	P97822	acidic (leucine-rich) nuclear phosphoprotein 32 family, member E
M1	DOWN	Pdpr	Q7TSQ8	pyruvate dehydrogenase phosphatase regulatory subunit
M1	DOWN	C1qa	P98086	complement component 1, q subcomponent, alpha polypeptide
M1	DOWN	Mgrn1	Q9D074	mahogunin, ring finger 1
M1	DOWN	Fasn	P19096	fatty acid synthase
M1	DOWN	Pdhb	Q9D051	pyruvate dehydrogenase (lipoamide) beta
M1	DOWN	Slc43a2	Q8CGA3	solute carrier family 43, member 2
M1	DOWN	Akr7a5	Q8CG76	aldo-keto reductase family 7, member A5 (aflatoxin aldehyde reductase)
M1	DOWN	Tmem19	Q91W52	transmembrane protein 19
M1	DOWN	Wdr91	Q7TMQ7	WD repeat domain 91
M1	DOWN	Txn2	P97493	thioredoxin 2
M1	DOWN	Myof	Q69ZN7	myoferlin
M1	DOWN	Cadm1	Q8R5M8	cell adhesion molecule 1
M1	DOWN	Pgls	Q9CQ60	6-phosphogluconolactonase
M1	DOWN	Ivd	Q9JHI5	isovaleryl coenzyme A dehydrogenase
M1	DOWN	Msh6	P54276	mutS homolog 6
M1	DOWN	Tacc1	Q6Y685	transforming, acidic coiled-coil containing protein 1
M1	DOWN	Dnph1	Q80VJ3	2'-deoxynucleoside 5'-phosphate N-hydrolase 1
M1	DOWN	Hadh	Q61425	hydroxyacyl-Coenzyme A dehydrogenase
M1	DOWN	2010107E04Rik	P56379	RIKEN cDNA 2010107E04 gene
M1	DOWN	Pi4ka	E9Q3L2	phosphatidylinositol 4-kinase alpha
M1	DOWN	Apoo	Q9DCZ4	apolipoprotein O
M1	DOWN	Fmo5	P97872	flavin containing monooxygenase 5
M1	DOWN	Uqcr11	Q9CPX8	ubiquinol-cytochrome c reductase, complex III subunit XI
M1	DOWN	Nadk2	Q8C5H8	NAD kinase 2, mitochondrial
M1	DOWN	Trim47	Q8C0E3	tripartite motif-containing 47
M1	DOWN	Wipf1	Q8K1I7	WAS/WASL interacting protein family, member 1
M1	DOWN	Aamdc	Q8R0P4	adipogenesis associated Mth938 domain containing
M1	DOWN	Thop1	Q8C1A5	thimet oligopeptidase 1
M1	DOWN	Etfb	Q9DCW4	electron transferring flavoprotein, beta polypeptide
M1	DOWN	Vps8	Q0P5W1	VPS8 CORVET complex subunit
M1	DOWN	Commd1	Q8K4M5	COMM domain containing 1
M1	DOWN	Nfs1	Q9Z1J3	nitrogen fixation gene 1 (S. cerevisiae)
M1	DOWN	Fh1	P97807	fumarate hydratase 1
M1	DOWN	9030624J02Rik	Q8BWQ6	RIKEN cDNA 9030624J02 gene
M1	DOWN	Hmgb3	O54879	high mobility group box 3
M1	DOWN	Nop16	Q9CPT5	NOP16 nucleolar protein
M1	DOWN	Cbr1	P48758	carbonyl reductase 1
M1	DOWN	Npc1	O35604	NPC intracellular cholesterol transporter 1
M1	DOWN	Paics	Q9DCL9	phosphoribosylaminoimidazole carboxylase, phosphoribosylaminoribosylaminoimidazole, succinocarboxamide synthetase
M1	DOWN	Timm13	P62075	translocase of inner mitochondrial membrane 13
M1	DOWN	Prcp	Q7TMR0	prolylcarboxypeptidase (angiotensinase C)
M1	DOWN	Atad3a	Q925I1	ATPase family, AAA domain containing 3A
M1	DOWN	Qdpr	Q8BVI4	quinoid dihydropteridine reductase
M1	DOWN	Syngr1	O55100	synaptogyrin 1
M1	DOWN	Pdha1	P35486	pyruvate dehydrogenase E1 alpha 1
M1	DOWN	Cox5a	P12787	cytochrome c oxidase subunit Va
M1	DOWN	Fes	P16879	feline sarcoma oncogene
M1	DOWN	Nans	Q99J77	N-acetylneuraminic acid synthase (sialic acid synthase)
M1	DOWN	Gmpr2	Q99L27	guanosine monophosphate reductase 2
M1	DOWN	Gsn	P13020	gelsolin
M1	DOWN	Mrps30	Q9D0G0	mitochondrial ribosomal protein S30
M1	DOWN	Glud1	P26443	glutamate dehydrogenase 1
M1	DOWN	Zbtb8os	Q505B7	zinc finger and BTB domain containing 8 opposite strand
M1	DOWN	Pld3	O35405	phospholipase D family, member 3
M1	DOWN	Glb1	P23780	galactosidase, beta 1
M1	DOWN	Foxj3	Q8BUR3	forkhead box J3
M1	DOWN	Ctnna1	P26231	catenin (cadherin associated protein), alpha 1
M1	DOWN	Galk2	Q68FH4	galactokinase 2
M1	DOWN	Arhgap25	Q8BYW1	Rho GTPase activating protein 25
M1	DOWN	Dhrs7	Q9CXR1	dehydrogenase/reductase (SDR family) member 7
M1	DOWN	Wdhd1	P59328	WD repeat and HMG-box DNA binding protein 1
M1	DOWN	Pip4k2a	O70172	phosphatidylinositol-5-phosphate 4-kinase, type II, alpha
M1	DOWN	Dpp3	Q99KK7	dipeptidylpeptidase 3
M1	DOWN	Oxct1	Q9D0K2	3-oxoacid CoA transferase 1
M1	DOWN	Ppp1r21	Q3TDD9	protein phosphatase 1, regulatory subunit 21
M1	DOWN	Lin7c	O88952	lin-7 homolog C (C. elegans)
M1	DOWN	Prorsd1	Q9D820	prolyl-tRNA synthetase domain containing 1
M1	DOWN	Gcat	O88986	glycine C-acetyltransferase (2-amino-3-ketobutyrate-coenzyme A ligase)
M1	DOWN	Fkbp3	Q62446	FK506 binding protein 3
M1	DOWN	Rpp30	O88796	ribonuclease P/MRP 30 subunit
M1	DOWN	Arhgef7	Q9ES28	Rho guanine nucleotide exchange factor (GEF7)
M1	DOWN	Mesd	Q9ERE7	mesoderm development LRP chaperone
M1	DOWN	Mtch2	Q791V5	mitochondrial carrier 2
M1	DOWN	Skp1a	Q9WTX5	S-phase kinase-associated protein 1A
M1	DOWN	Glo1	Q9CPU0	glyoxalase 1
M1	DOWN	Dusp3	Q9D7X3	dual specificity phosphatase 3 (vaccinia virus phosphatase VH1-related)
M1	DOWN	Pbdc1	Q9D0B6	polysaccharide biosynthesis domain containing 1
M1	DOWN	Wdr45b	Q9CR39	WD repeat domain 45B
M1	DOWN	Vac14	Q80WQ2	Vac14 homolog (S. cerevisiae)
M1	DOWN	Tkt	P40142	transketolase
M1	DOWN	Ado	Q6PDY2	2-aminoethanethiol (cysteamine) dioxygenase
M1	DOWN	Trim28	Q62318	tripartite motif-containing 28
M1	DOWN	Hebp1	Q9R257	heme binding protein 1
M1	DOWN	Clpx	Q9JHS4	caseinolytic mitochondrial matrix peptidase chaperone subunit
M1	DOWN	Ahcyl2	Q68FL4	S-adenosylhomocysteine hydrolase-like 2
M1	DOWN	Ptpra	P18052	protein tyrosine phosphatase, receptor type, A
M1	DOWN	Pde12	Q3TIU4	phosphodiesterase 12
M1	DOWN	Herc4	Q6PAV2	hect domain and RLD 4
M1	DOWN	2018-09-09	Q80UG5	septin 9
M1	DOWN	Nudcd2	Q9CQ48	NudC domain containing 2
M1	DOWN	Commd7	Q8BG94	COMM domain containing 7
M1	DOWN	Mrpl19	Q9D338	mitochondrial ribosomal protein L19
M1	DOWN	Rufy1	Q8BIJ7	RUN and FYVE domain containing 1
M1	DOWN	Crot	Q9DC50	carnitine O-octanoyltransferase
M1	DOWN	S100a6	P14069	S100 calcium binding protein A6 (calcyclin)
M1	DOWN	Ndufab1	Q9CR21	NADH dehydrogenase (ubiquinone) 1, alpha/beta subcomplex, 1
M1	DOWN	Sord	Q64442	sorbitol dehydrogenase
M1	DOWN	Cad	B2RQC6	carbamoyl-phosphate synthetase 2, aspartate transcarbamylase, and dihydroorotase
M1	DOWN	Smpd4	Q6ZPR5	sphingomyelin phosphodiesterase 4
M1	DOWN	Dhrs4	Q99LB2	dehydrogenase/reductase (SDR family) member 4
M1	DOWN	Gale	Q8R059	galactose-4-epimerase, UDP
M1	DOWN	Lyrm4	Q8K215	LYR motif containing 4
M1	DOWN	Oat	P29758	ornithine aminotransferase
M1	DOWN	Idh2	P54071	isocitrate dehydrogenase 2 (NADP+), mitochondrial
M1	DOWN	NA	Q2L4X1	NA
M1	DOWN	Bud23	Q9CY21	BUD23, rRNA methyltransferase and ribosome maturation factor
M1	DOWN	NA	Q5XG71	NA
M1	DOWN	Aldh4a1	Q8CHT0	aldehyde dehydrogenase 4 family, member A1
M1	DOWN	Ncbp2	Q9CQ49	nuclear cap binding protein subunit 2
M1	DOWN	Slc25a4	P48962	solute carrier family 25 (mitochondrial carrier, adenine nucleotide translocator), member 4
M1	DOWN	Stub1	Q9WUD1	STIP1 homology and U-Box containing protein 1
M1	DOWN	Frg1	P97376	FSHD region gene 1
M1	DOWN	Farsb	Q9WUA2	phenylalanyl-tRNA synthetase, beta subunit
M1	DOWN	Nhlrc3	Q8CCH2	NHL repeat containing 3
M1	DOWN	Thyn1	Q91YJ3	thymocyte nuclear protein 1
M1	DOWN	Fuca2	Q99KR8	fucosidase, alpha-L- 2, plasma
M1	DOWN	Arfgap2	Q99K28	ADP-ribosylation factor GTPase activating protein 2
M1	DOWN	Dbi	P31786	diazepam binding inhibitor
M1	DOWN	Cib1	Q9Z0F4	calcium and integrin binding 1 (calmyrin)
M1	DOWN	Commd4	Q9CQ02	COMM domain containing 4
M1	DOWN	Babam1	Q3UI43	BRISC and BRCA1 A complex member 1
M1	DOWN	Armc1	Q9D7A8	armadillo repeat containing 1
M1	DOWN	Impad1	Q80V26	inositol monophosphatase domain containing 1
M1	DOWN	Txnip	Q8BG60	thioredoxin interacting protein
M1	DOWN	Tpd52l2	Q9CYZ2	tumor protein D52-like 2
M1	DOWN	Ppa2	Q91VM9	pyrophosphatase (inorganic) 2
M1	DOWN	Nedd8	P29595	neural precursor cell expressed, developmentally down-regulated gene 8
M1	DOWN	c("Kifc5b", "Kifc1")	Q9QWT9	c("kinesin family member C5B", "kinesin family member C1")
M1	DOWN	Tufm	Q8BFR5	Tu translation elongation factor, mitochondrial
M1	DOWN	Ctps2	P70303	cytidine 5'-triphosphate synthase 2
M1	DOWN	Hook3	Q8BUK6	hook microtubule tethering protein 3
M1	DOWN	Osbpl9	A2A8Z1	oxysterol binding protein-like 9
M1	DOWN	Ppt1	O88531	palmitoyl-protein thioesterase 1
M1	DOWN	Nol9	Q3TZX8	nucleolar protein 9
M1	DOWN	Gtf3c4	Q8BMQ2	general transcription factor IIIC, polypeptide 4
M1	DOWN	Ube2i	P63280	ubiquitin-conjugating enzyme E2I
M1	DOWN	1110059G10Rik	Q8K039	RIKEN cDNA 1110059G10 gene
M1	DOWN	Nxf1	Q99JX7	nuclear RNA export factor 1
M1	DOWN	Fabp7	P51880	fatty acid binding protein 7, brain
M1	DOWN	Rabl6	Q5U3K5	RAB, member RAS oncogene family-like 6
M1	DOWN	Rrm1	P07742	ribonucleotide reductase M1
M1	DOWN	Lrrc40	Q9CRC8	leucine rich repeat containing 40
M1	DOWN	Ndufb11	O09111	NADH dehydrogenase (ubiquinone) 1 beta subcomplex, 11
M1	DOWN	Otud6b	Q8K2H2	OTU domain containing 6B
M1	DOWN	Kcnab2	P62482	potassium voltage-gated channel, shaker-related subfamily, beta member 2
M1	DOWN	Mcoln1	Q99J21	mucolipin 1
M1	DOWN	Lsm3	P62311	LSM3 homolog, U6 small nuclear RNA and mRNA degradation associated
M1	DOWN	Diablo	Q9JIQ3	diablo, IAP-binding mitochondrial protein
M1	DOWN	Lig1	P37913	ligase I, DNA, ATP-dependent
M1	DOWN	Lbh	Q9CX60	limb-bud and heart
M1	DOWN	Ncapd2	Q8K2Z4	non-SMC condensin I complex, subunit D2
M1	DOWN	Atp6ap2	Q9CYN9	ATPase, H+ transporting, lysosomal accessory protein 2
M1	DOWN	Hs1bp3	Q3TC93	HCLS1 binding protein 3
M1	DOWN	Hccs	P53702	holocytochrome c synthetase
M1	DOWN	Erg28	Q9ERY9	ergosterol biosynthesis 28
M1	DOWN	Lsm8	Q6ZWM4	LSM8 homolog, U6 small nuclear RNA associated
M1	DOWN	Fam50a	Q9WV03	family with sequence similarity 50, member A
M1	DOWN	Ccdc167	Q9D162	coiled-coil domain containing 167
M1	DOWN	Snx12	O70493	sorting nexin 12
M1	DOWN	Tomm22	Q9CPQ3	translocase of outer mitochondrial membrane 22 homolog (yeast)
M1	DOWN	Hsd17b4	P51660	hydroxysteroid (17-beta) dehydrogenase 4
M1	DOWN	Dok2	O70469	docking protein 2
M1	DOWN	NA	O88643	NA
M1	DOWN	Nedd1	P33215	neural precursor cell expressed, developmentally down-regulated gene 1
M1	DOWN	Ndufb7	Q9CR61	NADH dehydrogenase (ubiquinone) 1 beta subcomplex, 7
M1	DOWN	NA	P49718	NA
M1	DOWN	Atp5o	Q9DB20	ATP synthase, H+ transporting, mitochondrial F1 complex, O subunit
M1	DOWN	Blvra	Q9CY64	biliverdin reductase A
M1	DOWN	Mlec	Q6ZQI3	malectin
M1	DOWN	Etfa	Q99LC5	electron transferring flavoprotein, alpha polypeptide
M1	DOWN	Sun2	Q8BJS4	Sad1 and UNC84 domain containing 2
M1	DOWN	Git2	Q9JLQ2	G protein-coupled receptor kinase-interactor 2
M1	DOWN	NA	Q5SXY1	NA
M1	DOWN	Ddhd2	Q80Y98	DDHD domain containing 2
M1	DOWN	Sucla2	Q9Z2I9	succinate-Coenzyme A ligase, ADP-forming, beta subunit
M1	DOWN	Atp5h	Q9DCX2	ATP synthase, H+ transporting, mitochondrial F0 complex, subunit D
M1	DOWN	Thumpd3	P97770	THUMP domain containing 3
M1	DOWN	Nup133	Q8R0G9	nucleoporin 133
M1	DOWN	Hexb	P20060	hexosaminidase B
M1	DOWN	NA	P25976	NA
M1	DOWN	Map2k3	O09110	mitogen-activated protein kinase kinase 3
M1	DOWN	Wdr61	Q9ERF3	WD repeat domain 61
M1	DOWN	Rfc2	Q9WUK4	replication factor C (activator 1) 2
M1	DOWN	Lsm4	Q9QXA5	LSM4 homolog, U6 small nuclear RNA and mRNA degradation associated
M1	DOWN	Pdcd6	P12815	programmed cell death 6
M1	DOWN	Tcerg1	Q8CGF7	transcription elongation regulator 1 (CA150)
M1	DOWN	Galk1	Q9R0N0	galactokinase 1
M1	DOWN	Lamp1	P11438	lysosomal-associated membrane protein 1
M1	DOWN	Trpv2	Q9WTR1	transient receptor potential cation channel, subfamily V, member 2
M1	DOWN	Cryl1	Q99KP3	crystallin, lambda 1
M1	DOWN	Khsrp	Q3U0V1	KH-type splicing regulatory protein
M1	DOWN	Dhrs1	Q99L04	dehydrogenase/reductase (SDR family) member 1
M1	DOWN	Pip5k1c	O70161	phosphatidylinositol-4-phosphate 5-kinase, type 1 gamma
M1	DOWN	Ilkap	Q8R0F6	integrin-linked kinase-associated serine/threonine phosphatase 2C
M1	DOWN	Sgta	Q8BJU0	small glutamine-rich tetratricopeptide repeat (TPR)-containing, alpha
M1	DOWN	B3glct	Q8BHT6	beta-3-glucosyltransferase
M1	DOWN	Spryd4	Q91WK1	SPRY domain containing 4
M1	DOWN	Dhcr24	Q8VCH6	24-dehydrocholesterol reductase
M1	DOWN	Tsn	Q62348	translin
M1	DOWN	Jpt2	Q6PGH2	Jupiter microtubule associated homolog 2
M1	DOWN	Scpep1	Q920A5	serine carboxypeptidase 1
M1	DOWN	Nt5c	Q9JM14	5',3'-nucleotidase, cytosolic
M1	DOWN	Commd8	Q9CZG3	COMM domain containing 8
M1	DOWN	Ttyh3	Q6P5F7	tweety family member 3
M1	DOWN	Pex19	Q8VCI5	peroxisomal biogenesis factor 19
M1	DOWN	Tomm20	Q9DCC8	translocase of outer mitochondrial membrane 20 homolog (yeast)
M1	DOWN	Dnajc24	Q91ZF0	DnaJ heat shock protein family (Hsp40) member C24
M1	DOWN	Ahcyl1	Q80SW1	S-adenosylhomocysteine hydrolase-like 1
M1	DOWN	Ctsa	P16675	cathepsin A
M1	DOWN	Ap2s1	P62743	adaptor-related protein complex 2, sigma 1 subunit
M1	DOWN	Mindy2	Q6PDI6	MINDY lysine 48 deubiquitinase 2
M1	DOWN	Eci1	P42125	enoyl-Coenzyme A delta isomerase 1
M1	DOWN	Prpf31	Q8CCF0	pre-mRNA processing factor 31
M1	DOWN	Pls3	Q99K51	plastin 3 (T-isoform)
M1	DOWN	Ap1b1	O35643	adaptor protein complex AP-1, beta 1 subunit
M1	DOWN	Tnfaip8l2	Q9D8Y7	tumor necrosis factor, alpha-induced protein 8-like 2
M1	DOWN	Tfam	P40630	transcription factor A, mitochondrial
M1	DOWN	Rab1b	Q9D1G1	RAB1B, member RAS oncogene family
M1	DOWN	Emc8	O70378	ER membrane protein complex subunit 8
M1	DOWN	Slc35e1	Q8CD26	solute carrier family 35, member E1
M1	DOWN	Cnpy4	Q8BQ47	canopy FGF signaling regulator 4
M1	DOWN	Hdgf	P51859	hepatoma-derived growth factor
M1	DOWN	NA	O35658	NA
M1	DOWN	NA	P97352	NA
M1	DOWN	Letm1	Q9Z2I0	leucine zipper-EF-hand containing transmembrane protein 1
M1	DOWN	Slc15a4	Q91W98	solute carrier family 15, member 4
M1	DOWN	Cog6	Q8R3I3	component of oligomeric golgi complex 6
M1	DOWN	Ube3a	O08759	ubiquitin protein ligase E3A
M1	DOWN	Pebp1	P70296	phosphatidylethanolamine binding protein 1
M1	DOWN	Nup93	Q8BJ71	nucleoporin 93
M1	DOWN	Mat2b	Q99LB6	methionine adenosyltransferase II, beta
M1	DOWN	Slc39a11	Q8BWY7	solute carrier family 39 (metal ion transporter), member 11
M1	DOWN	Atp1a1	Q8VDN2	ATPase, Na+/K+ transporting, alpha 1 polypeptide
M1	DOWN	Atp2a2	O55143	ATPase, Ca++ transporting, cardiac muscle, slow twitch 2
M1	DOWN	Ap2a2	P17427	adaptor-related protein complex 2, alpha 2 subunit
M1	DOWN	Ndc1	Q8VCB1	NDC1 transmembrane nucleoporin
M1	DOWN	Uchl3	Q9JKB1	ubiquitin carboxyl-terminal esterase L3 (ubiquitin thiolesterase)
M1	DOWN	Vat1	Q62465	vesicle amine transport 1
M1	DOWN	Anp32b	Q9EST5	acidic (leucine-rich) nuclear phosphoprotein 32 family, member B
M1	DOWN	Afg3l2	Q8JZQ2	AFG3-like AAA ATPase 2
M1	DOWN	Trap1	Q9CQN1	TNF receptor-associated protein 1
M1	DOWN	Myg1	Q9JK81	melanocyte proliferating gene 1
M1	DOWN	Atp5d	Q9D3D9	ATP synthase, H+ transporting, mitochondrial F1 complex, delta subunit
M1	DOWN	Ctsd	P18242	cathepsin D
M1	DOWN	Mindy1	Q76LS9	MINDY lysine 48 deubiquitinase 1
M1	DOWN	Pola1	P33609	polymerase (DNA directed), alpha 1
M1	DOWN	Cmas	Q99KK2	cytidine monophospho-N-acetylneuraminic acid synthetase
M1	DOWN	Mcm3	P25206	minichromosome maintenance complex component 3
M1	DOWN	Atp5k	Q06185	ATP synthase, H+ transporting, mitochondrial F1F0 complex, subunit E
M1	DOWN	Enpp1	P06802	ectonucleotide pyrophosphatase/phosphodiesterase 1
M1	DOWN	Washc2	Q6PGL7	WASH complex subunit 2
M1	DOWN	Hps6	Q8BLY7	HPS6, biogenesis of lysosomal organelles complex 2 subunit 3
M1	DOWN	c("Nutf2", "Nutf2-ps2")	P61971	c("nuclear transport factor 2", "nuclear transport factor 2, pseudogene 2")
M1	DOWN	Srsf1	Q6PDM2	serine/arginine-rich splicing factor 1
M1	DOWN	Vps11	Q91W86	VPS11, CORVET/HOPS core subunit
M1	DOWN	Capns1	O88456	calpain, small subunit 1
M1	DOWN	Atic	Q9CWJ9	5-aminoimidazole-4-carboxamide ribonucleotide formyltransferase/IMP cyclohydrolase
M1	DOWN	Dpm1	O70152	dolichol-phosphate (beta-D) mannosyltransferase 1
M1	DOWN	Glrx3	Q9CQM9	glutaredoxin 3
M1	DOWN	c("Hmgb1", "Gm21596")	P63158	c("high mobility group box 1", "predicted gene, 21596")
M1	DOWN	Capn2	O08529	calpain 2
M1	DOWN	Dda1	Q9D9Z5	DET1 and DDB1 associated 1
M1	DOWN	Ndufb3	Q9CQZ6	NADH dehydrogenase (ubiquinone) 1 beta subcomplex 3
M1	DOWN	Idh3a	Q9D6R2	isocitrate dehydrogenase 3 (NAD+) alpha
M1	DOWN	Ruvbl2	Q9WTM5	RuvB-like protein 2
M1	DOWN	Gm38495	Q6PIU9	predicted gene, 38495
M1	DOWN	Smc4	Q8CG47	structural maintenance of chromosomes 4
M1	DOWN	Musk	Q61006	muscle, skeletal, receptor tyrosine kinase
M1	DOWN	Adam9	Q61072	a disintegrin and metallopeptidase domain 9 (meltrin gamma)
M1	DOWN	Pfas	Q5SUR0	phosphoribosylformylglycinamidine synthase (FGAR amidotransferase)
M1	DOWN	Ndufb5	Q9CQH3	NADH dehydrogenase (ubiquinone) 1 beta subcomplex, 5
M1	DOWN	Camk1	Q91YS8	calcium/calmodulin-dependent protein kinase I
M1	DOWN	Parl	Q5XJY4	presenilin associated, rhomboid-like
M1	DOWN	Iscu	Q9D7P6	iron-sulfur cluster assembly enzyme
M1	DOWN	Pgm1	Q7TSV4	phosphoglucomutase 1
M1	DOWN	Usp14	Q9JMA1	ubiquitin specific peptidase 14
M1	DOWN	4931406C07Rik	Q91V76	RIKEN cDNA 4931406C07 gene
M1	DOWN	NA	Q9D855	NA
M1	DOWN	Tial1	P70318	Tia1 cytotoxic granule-associated RNA binding protein-like 1
M1	DOWN	Ripk1	Q60855	receptor (TNFRSF)-interacting serine-threonine kinase 1
M1	DOWN	Atp5f1	Q9CQQ7	ATP synthase, H+ transporting, mitochondrial F0 complex, subunit B1
M1	DOWN	Kpnb1	P70168	karyopherin (importin) beta 1
M1	DOWN	Rnh1	Q91VI7	ribonuclease/angiogenin inhibitor 1
M1	DOWN	Acsf3	Q3URE1	acyl-CoA synthetase family member 3
M1	DOWN	Trmt10c	Q3UFY8	tRNA methyltransferase 10C
M1	DOWN	Cbfb	Q08024	core binding factor beta
M1	DOWN	Xpo4	Q9ESJ0	exportin 4
M1	DOWN	Ogdh	Q60597	oxoglutarate (alpha-ketoglutarate) dehydrogenase (lipoamide)
M1	DOWN	Vsir	Q9D659	V-set immunoregulatory receptor
M1	DOWN	Lman2	Q9DBH5	lectin, mannose-binding 2
M1	DOWN	Washc5	Q8C2E7	WASH complex subunit 5
M1	DOWN	Hpgds	Q9JHF7	hematopoietic prostaglandin D synthase
M1	DOWN	Ipo11	Q8K2V6	importin 11
M1	DOWN	Git1	Q68FF6	G protein-coupled receptor kinase-interactor 1
M1	DOWN	Aifm1	Q9Z0X1	apoptosis-inducing factor, mitochondrion-associated 1
M1	DOWN	Timm8a1	Q9WVA2	translocase of inner mitochondrial membrane 8A1
M1	DOWN	Sub1	P11031	SUB1 homolog (S. cerevisiae)
M1	DOWN	Shtn1	Q8K2Q9	shootin 1
M1	DOWN	Tlr13	Q6R5N8	toll-like receptor 13
M1	DOWN	Phb	P67778	prohibitin
M1	DOWN	Bet1l	O35153	Bet1 golgi vesicular membrane trafficking protein like
M1	DOWN	Vamp7	P70280	vesicle-associated membrane protein 7
M1	DOWN	Smc2	Q8CG48	structural maintenance of chromosomes 2
M1	DOWN	Adssl1	P28650	adenylosuccinate synthetase like 1
M1	DOWN	Trmt2a	Q8BNV1	TRM2 tRNA methyltransferase 2A
M1	DOWN	Mms19	Q9D071	MMS19 (MET18 S. cerevisiae)
M1	DOWN	Tomm34	Q9CYG7	translocase of outer mitochondrial membrane 34
M1	DOWN	Pes1	Q9EQ61	pescadillo ribosomal biogenesis factor 1
M1	DOWN	Atp5a1	Q03265	ATP synthase, H+ transporting, mitochondrial F1 complex, alpha subunit 1
M1	DOWN	Txndc5	Q91W90	thioredoxin domain containing 5
M1	DOWN	Wdr5	P61965	WD repeat domain 5
M1	DOWN	Naxe	Q8K4Z3	NAD(P)HX epimerase
M1	DOWN	Nceh1	Q8BLF1	neutral cholesterol ester hydrolase 1
M1	DOWN	Mogs	Q80UM7	mannosyl-oligosaccharide glucosidase
M1	DOWN	Rap1a	P62835	RAS-related protein 1a
M1	DOWN	Hspa14	Q99M31	heat shock protein 14
M1	DOWN	Cmtm7	Q9ESD6	CKLF-like MARVEL transmembrane domain containing 7
M1	DOWN	Gstt3	Q99L20	glutathione S-transferase, theta 3
M1	DOWN	Rcn2	Q8BP92	reticulocalbin 2
M1	DOWN	Ddah2	Q99LD8	dimethylarginine dimethylaminohydrolase 2
M1	DOWN	Ano6	Q6P9J9	anoctamin 6
M1	DOWN	Aldh9a1	Q9JLJ2	aldehyde dehydrogenase 9, subfamily A1
M1	DOWN	Fam120a	Q6A0A9	family with sequence similarity 120, member A
M1	DOWN	Cd48	P18181	CD48 antigen
M1	DOWN	Phb2	O35129	prohibitin 2
M1	DOWN	Ncaph	Q8C156	non-SMC condensin I complex, subunit H
M1	DOWN	Vps53	Q8CCB4	VPS53 GARP complex subunit
M1	DOWN	Hpf1	Q8CFE2	histone PARylation factor 1
M1	DOWN	Gcn1l1	E9PVA8	GCN1 general control of amino-acid synthesis 1-like 1 (yeast)
M1	DOWN	Mbp	P04370	myelin basic protein
M1	DOWN	Pelp1	Q9DBD5	proline, glutamic acid and leucine rich protein 1
M1	DOWN	Mthfd1	Q922D8	methylenetetrahydrofolate dehydrogenase (NADP+ dependent), methenyltetrahydrofolate cyclohydrolase, formyltetrahydrofolate synthase
M1	DOWN	Abcb7	Q61102	ATP-binding cassette, sub-family B (MDR/TAP), member 7
M1	DOWN	Ndufaf2	Q59J78	NADH dehydrogenase (ubiquinone) 1 alpha subcomplex, assembly factor 2
M1	DOWN	Plin3	Q9DBG5	perilipin 3
M1	DOWN	Pdcd6ip	Q9WU78	programmed cell death 6 interacting protein
M1	DOWN	Hnrnpm	Q9D0E1	heterogeneous nuclear ribonucleoprotein M
M1	DOWN	Soat1	Q61263	sterol O-acyltransferase 1
M1	DOWN	Got2	P05202	glutamatic-oxaloacetic transaminase 2, mitochondrial
M1	DOWN	Btk	P35991	Bruton agammaglobulinemia tyrosine kinase
M1	DOWN	Pgrmc2	Q80UU9	progesterone receptor membrane component 2
M1	DOWN	Nup107	Q8BH74	nucleoporin 107
M1	DOWN	Dhrs7b	Q99J47	dehydrogenase/reductase (SDR family) member 7B
M1	DOWN	Fxyd5	P97808	FXYD domain-containing ion transport regulator 5
M1	DOWN	Rps6ka3	P18654	ribosomal protein S6 kinase polypeptide 3
M1	DOWN	Thumpd1	Q99J36	THUMP domain containing 1
M1	DOWN	Nup155	Q99P88	nucleoporin 155
M1	DOWN	D10Jhu81e	Q9D172	DNA segment, Chr 10, Johns Hopkins University 81 expressed
M1	DOWN	Glrx2	Q923X4	glutaredoxin 2 (thioltransferase)
M1	DOWN	Sdha	Q8K2B3	succinate dehydrogenase complex, subunit A, flavoprotein (Fp)
M1	DOWN	Srp9	P49962	signal recognition particle 9
M1	DOWN	NA	Q9JHR7	NA
M1	DOWN	Acad11	Q80XL6	acyl-Coenzyme A dehydrogenase family, member 11
M1	DOWN	Tbc1d8b	A3KGB4	TBC1 domain family, member 8B
M1	DOWN	Plgrkt	Q9D3P8	plasminogen receptor, C-terminal lysine transmembrane protein
M1	DOWN	Sts	P50427	steroid sulfatase
M1	DOWN	Plpbp	Q9Z2Y8	pyridoxal phosphate binding protein
M1	DOWN	Ipo4	Q8VI75	importin 4
M1	DOWN	Ppp3ca	P63328	protein phosphatase 3, catalytic subunit, alpha isoform
M1	DOWN	Gigyf2	Q6Y7W8	GRB10 interacting GYF protein 2
M1	DOWN	Ciao1	Q99KN2	cytosolic iron-sulfur protein assembly 1
M1	DOWN	Ripk3	Q9QZL0	receptor-interacting serine-threonine kinase 3
M1	DOWN	Acp6	Q8BP40	acid phosphatase 6, lysophosphatidic
M1	DOWN	Epb41	P48193	erythrocyte membrane protein band 4.1
M1	DOWN	2018-09-07	O55131	septin 7
M1	DOWN	Lta4h	P24527	leukotriene A4 hydrolase
M1	DOWN	Haus4	Q8BFT2	HAUS augmin-like complex, subunit 4
M1	DOWN	Prim2	P33610	DNA primase, p58 subunit
M1	DOWN	Fam45a	Q9D8N2	family with sequence similarity 45, member A
M1	DOWN	Aldh16a1	Q571I9	aldehyde dehydrogenase 16 family, member A1
M1	DOWN	Aimp2	Q8R010	aminoacyl tRNA synthetase complex-interacting multifunctional protein 2
M1	DOWN	Ap2a1	P17426	adaptor-related protein complex 2, alpha 1 subunit
M1	DOWN	Bcap29	Q61334	B cell receptor associated protein 29
M1	DOWN	Lypla2	Q9WTL7	lysophospholipase 2
M1	DOWN	Aarsd1	Q3THG9	alanyl-tRNA synthetase domain containing 1
M1	DOWN	Pfdn2	O70591	prefoldin 2
M1	DOWN	Rabgap1	A2AWA9	RAB GTPase activating protein 1
M1	DOWN	Pld4	Q8BG07	phospholipase D family, member 4
M1	DOWN	Hnrnpf	Q9Z2X1	heterogeneous nuclear ribonucleoprotein F
M1	DOWN	Ipo7	Q9EPL8	importin 7
M1	DOWN	Cdc42bpb	Q7TT50	CDC42 binding protein kinase beta
M1	DOWN	NA	P24452	NA
M1	DOWN	Rdx	P26043	radixin
M1	DOWN	Atg7	Q9D906	autophagy related 7
M1	DOWN	Degs1	O09005	delta(4)-desaturase, sphingolipid 1
M1	DOWN	3110082I17Rik	Q9CXL3	RIKEN cDNA 3110082I17 gene
M1	DOWN	Ccdc43	Q9CR29	coiled-coil domain containing 43
M1	DOWN	Bcat2	O35855	branched chain aminotransferase 2, mitochondrial
M1	DOWN	Asl	Q91YI0	argininosuccinate lyase
M1	DOWN	Snx4	Q91YJ2	sorting nexin 4
M1	DOWN	Adprhl2	Q8CG72	ADP-ribosylhydrolase like 2
M1	DOWN	Abraxas2	Q3TCJ1	BRISC complex subunit
M1	DOWN	Gnas	Q6R0H7	GNAS (guanine nucleotide binding protein, alpha stimulating) complex locus
M1	DOWN	Akr1b3	P45376	aldo-keto reductase family 1, member B3 (aldose reductase)
M1	DOWN	Pqbp1	Q91VJ5	polyglutamine binding protein 1
M1	DOWN	Pdap1	Q3UHX2	PDGFA associated protein 1
M1	DOWN	Mre11a	Q61216	MRE11A homolog A, double strand break repair nuclease
M1	DOWN	Ints12	Q9D168	integrator complex subunit 12
M1	DOWN	Rbm14	Q8C2Q3	RNA binding motif protein 14
M1	DOWN	Rab14	Q91V41	RAB14, member RAS oncogene family
M1	DOWN	Opa1	P58281	OPA1, mitochondrial dynamin like GTPase
M1	DOWN	1700037H04Rik	Q9D1K7	RIKEN cDNA 1700037H04 gene
M1	DOWN	Snrpd3	P62320	small nuclear ribonucleoprotein D3
M1	DOWN	Ap2m1	P84091	adaptor-related protein complex 2, mu 1 subunit
M1	DOWN	NA	P05555	NA
M1	DOWN	Mapk3	Q63844	mitogen-activated protein kinase 3
M1	DOWN	Rpl38	Q9JJI8	ribosomal protein L38
M1	DOWN	Dars	Q922B2	aspartyl-tRNA synthetase
M1	DOWN	Neu1	O35657	neuraminidase 1
M1	DOWN	Vipas39	Q8BGQ1	VPS33B interacting protein, apical-basolateral polarity regulator, spe-39 homolog
M1	DOWN	Nab2	Q61127	Ngfi-A binding protein 2
M1	DOWN	Glmp	Q9JHJ3	glycosylated lysosomal membrane protein
M1	DOWN	Skiv2l2	Q9CZU3	superkiller viralicidic activity 2-like 2 (S. cerevisiae)
M1	DOWN	2310022A10Rik	Q8R3Y5	RIKEN cDNA 2310022A10 gene
M1	DOWN	Ggh	Q9Z0L8	gamma-glutamyl hydrolase
M1	DOWN	Phf5a	P83870	PHD finger protein 5A
M1	DOWN	2018-09-02	P42208	septin 2
M1	DOWN	Dhfr	P00375	dihydrofolate reductase
M1	DOWN	Hint1	P70349	histidine triad nucleotide binding protein 1
M1	DOWN	Lamtor2	Q9JHS3	late endosomal/lysosomal adaptor, MAPK and MTOR activator 2
M1	DOWN	Ilf2	Q9CXY6	interleukin enhancer binding factor 2
M1	DOWN	Mmgt1	Q8K273	membrane magnesium transporter 1
M1	DOWN	Tmx4	Q8C0L0	thioredoxin-related transmembrane protein 4
M1	DOWN	Prkacb	P68181	protein kinase, cAMP dependent, catalytic, beta
M1	DOWN	Mob4	Q6PEB6	MOB family member 4, phocein
M1	DOWN	Stk38	Q91VJ4	serine/threonine kinase 38
M1	DOWN	Mavs	Q8VCF0	mitochondrial antiviral signaling protein
M1	DOWN	Adh5	P28474	alcohol dehydrogenase 5 (class III), chi polypeptide
M1	DOWN	Tmem65	Q4VAE3	transmembrane protein 65
M1	DOWN	Hmbs	P22907	hydroxymethylbilane synthase
M1	DOWN	Hcfc1	Q61191	host cell factor C1
M1	DOWN	NA	Q64213	NA
M1	DOWN	Rab35	Q6PHN9	RAB35, member RAS oncogene family
M1	DOWN	Snx1	Q9WV80	sorting nexin 1
M1	DOWN	Rmdn1	Q9DCV4	regulator of microtubule dynamics 1
M1	DOWN	Arl8b	Q9CQW2	ADP-ribosylation factor-like 8B
M1	DOWN	Spdl1	Q923A2	spindle apparatus coiled-coil protein 1
M1	DOWN	Ssr1	Q9CY50	signal sequence receptor, alpha
M1	DOWN	Sfxn1	Q99JR1	sideroflexin 1
M1	DOWN	Gaa	P70699	glucosidase, alpha, acid
M1	DOWN	Tars2	Q3UQ84	threonyl-tRNA synthetase 2, mitochondrial (putative)
M1	DOWN	Eif4e	P63073	eukaryotic translation initiation factor 4E
M1	DOWN	Creld1	Q91XD7	cysteine-rich with EGF-like domains 1
M1	DOWN	Glg1	Q61543	golgi apparatus protein 1
M1	DOWN	Mrpl54	Q9CPW3	mitochondrial ribosomal protein L54
M1	DOWN	Slc9a9	Q8BZ00	solute carrier family 9 (sodium/hydrogen exchanger), member 9
M1	DOWN	Ptpmt1	Q66GT5	protein tyrosine phosphatase, mitochondrial 1
M1	DOWN	Cmpk1	Q9DBP5	cytidine monophosphate (UMP-CMP) kinase 1
M1	DOWN	Nap1l1	P28656	nucleosome assembly protein 1-like 1
M1	DOWN	Cnpy3	Q9DAU1	canopy FGF signaling regulator 3
M1	DOWN	Smchd1	Q6P5D8	SMC hinge domain containing 1
M1	DOWN	Cdc123	Q8CII2	cell division cycle 123
M1	DOWN	Tomm7	Q9D173	translocase of outer mitochondrial membrane 7 homolog (yeast)
M1	DOWN	Efl1	Q8C0D5	elongation factor like GPTase 1
M1	DOWN	Nup188	Q6ZQH8	nucleoporin 188
M1	DOWN	Selenoo	Q9DBC0	selenoprotein O
M1	DOWN	Sae1	Q9R1T2	SUMO1 activating enzyme subunit 1
M1	DOWN	Nme3	Q9WV85	NME/NM23 nucleoside diphosphate kinase 3
M1	DOWN	Atp5c1	Q91VR2	ATP synthase, H+ transporting, mitochondrial F1 complex, gamma polypeptide 1
M1	DOWN	Rpn1	Q91YQ5	ribophorin I
M1	DOWN	Ddx3y	Q62095	DEAD (Asp-Glu-Ala-Asp) box polypeptide 3, Y-linked
M1	DOWN	Gls	D3Z7P3	glutaminase
M1	DOWN	Erp29	P57759	endoplasmic reticulum protein 29
M1	DOWN	Mknk1	O08605	MAP kinase-interacting serine/threonine kinase 1
M1	DOWN	Sypl	O09117	synaptophysin-like protein
M1	DOWN	Dab2	P98078	disabled 2, mitogen-responsive phosphoprotein
M1	DOWN	Gdi2	Q61598	guanosine diphosphate (GDP) dissociation inhibitor 2
M1	DOWN	Pttg1ip	Q8R143	pituitary tumor-transforming 1 interacting protein
M1	DOWN	Tsnax	Q9QZE7	translin-associated factor X
M1	DOWN	Bri3bp	Q8BXV2	Bri3 binding protein
M1	DOWN	Ercc6l	Q8BHK9	excision repair cross-complementing rodent repair deficiency complementation group 6 like
M1	DOWN	Park7	Q99LX0	Parkinson disease (autosomal recessive, early onset) 7
M1	DOWN	Dad1	P61804	defender against cell death 1
M1	DOWN	Fam213b	Q9DB60	family with sequence similarity 213, member B
M1	DOWN	Gtf2e1	Q9D0D5	general transcription factor II E, polypeptide 1 (alpha subunit)
M1	DOWN	Pygb	Q8CI94	brain glycogen phosphorylase
M1	DOWN	Nudt5	Q9JKX6	nudix (nucleoside diphosphate linked moiety X)-type motif 5
M1	DOWN	Exoc7	O35250	exocyst complex component 7
M1	DOWN	Amdhd2	Q8JZV7	amidohydrolase domain containing 2
M1	DOWN	Dnaja3	Q99M87	DnaJ heat shock protein family (Hsp40) member A3
M1	DOWN	Uprt	B1AVZ0	uracil phosphoribosyltransferase
M1	DOWN	Dym	Q8CHY3	dymeclin
M1	DOWN	Ubl7	Q91W67	ubiquitin-like 7 (bone marrow stromal cell-derived)
M1	DOWN	Kif15	Q6P9L6	kinesin family member 15
M1	DOWN	Eif4b	Q8BGD9	eukaryotic translation initiation factor 4B
M1	DOWN	Gmfb	Q9CQI3	glia maturation factor, beta
M1	DOWN	Stt3a	P46978	STT3, subunit of the oligosaccharyltransferase complex, homolog A (S. cerevisiae)
M1	DOWN	1810037I17Rik	Q99M08	RIKEN cDNA 1810037I17 gene
M1	DOWN	Lrrc47	Q505F5	leucine rich repeat containing 47
M1	DOWN	Eprs	Q8CGC7	glutamyl-prolyl-tRNA synthetase
M1	DOWN	Lamtor3	O88653	late endosomal/lysosomal adaptor, MAPK and MTOR activator 3
M1	DOWN	Gtf2e2	Q9D902	general transcription factor II E, polypeptide 2 (beta subunit)
M1	DOWN	Pycr2	Q922Q4	pyrroline-5-carboxylate reductase family, member 2
M1	DOWN	Rnasel	Q05921	ribonuclease L (2', 5'-oligoisoadenylate synthetase-dependent)
M1	DOWN	Gabpa	Q00422	GA repeat binding protein, alpha
M1	DOWN	Nhp2	Q9CRB2	NHP2 ribonucleoprotein
M1	DOWN	Ankmy2	Q3TPE9	ankyrin repeat and MYND domain containing 2
M1	DOWN	Ptms	Q9D0J8	parathymosin
M1	DOWN	Pelo	Q80X73	pelota mRNA surveillance and ribosome rescue factor
M1	DOWN	Rnaseh2a	Q9CWY8	ribonuclease H2, large subunit
M1	DOWN	Mecr	Q9DCS3	mitochondrial trans-2-enoyl-CoA reductase
M1	DOWN	Pikfyve	Q9Z1T6	phosphoinositide kinase, FYVE type zinc finger containing
M1	DOWN	Ankrd13a	Q80UP5	ankyrin repeat domain 13a
M1	DOWN	Chmp2b	Q8BJF9	charged multivesicular body protein 2B
M1	DOWN	Trappc3	O55013	trafficking protein particle complex 3
M1	DOWN	Eif4h	Q9WUK2	eukaryotic translation initiation factor 4H
M1	DOWN	Ints7	Q7TQK1	integrator complex subunit 7
M1	DOWN	Ubr2	Q6WKZ8	ubiquitin protein ligase E3 component n-recognin 2
M1	DOWN	Ubqln1	Q8R317	ubiquilin 1
M1	DOWN	Picalm	Q7M6Y3	phosphatidylinositol binding clathrin assembly protein
M1	DOWN	Bpnt1	Q9Z0S1	bisphosphate 3'-nucleotidase 1
M1	DOWN	Rpl18	P35980	ribosomal protein L18
M1	DOWN	Prpf8	Q99PV0	pre-mRNA processing factor 8
M1	DOWN	Hltf	Q6PCN7	helicase-like transcription factor
M1	DOWN	Twf2	Q9Z0P5	twinfilin actin binding protein 2
M1	DOWN	Cdkn2aip	Q8BI72	CDKN2A interacting protein
M1	DOWN	Btf3l4	Q9CQH7	basic transcription factor 3-like 4
M1	DOWN	Lsm6	P62313	LSM6 homolog, U6 small nuclear RNA and mRNA degradation associated
M1	DOWN	Tyms	P07607	thymidylate synthase
M1	DOWN	Atg5	Q99J83	autophagy related 5
M1	DOWN	Man2c1	Q91W89	mannosidase, alpha, class 2C, member 1
M1	DOWN	Shmt1	P50431	serine hydroxymethyltransferase 1 (soluble)
M1	DOWN	Tubb4b	P68372	tubulin, beta 4B class IVB
M1	DOWN	Grpel1	Q99LP6	GrpE-like 1, mitochondrial
M1	DOWN	Vars	Q9Z1Q9	valyl-tRNA synthetase
M1	DOWN	Exoc4	O35382	exocyst complex component 4
M1	DOWN	Snrpd2	P62317	small nuclear ribonucleoprotein D2
M1	DOWN	Aldh7a1	Q9DBF1	aldehyde dehydrogenase family 7, member A1
M1	DOWN	Tpm1	P58771	tropomyosin 1, alpha
M1	DOWN	Gcdh	Q60759	glutaryl-Coenzyme A dehydrogenase
M1	DOWN	Fcho2	Q3UQN2	FCH domain only 2
M1	DOWN	Renbp	P82343	renin binding protein
M1	DOWN	Atp6ap1	Q9R1Q9	ATPase, H+ transporting, lysosomal accessory protein 1
M1	DOWN	Gtpbp4	Q99ME9	GTP binding protein 4
M1	DOWN	Ehmt1	Q5DW34	euchromatic histone methyltransferase 1
M1	DOWN	Gpx4	O70325	glutathione peroxidase 4
M1	DOWN	Tm9sf3	Q9ET30	transmembrane 9 superfamily member 3
M1	DOWN	Rad23a	P54726	RAD23 homolog A, nucleotide excision repair protein
M1	DOWN	Uhrf1bp1l	A2RSJ4	UHRF1 (ICBP90) binding protein 1-like
M1	DOWN	Cops4	O88544	COP9 signalosome subunit 4
M1	DOWN	Anxa3	O35639	annexin A3
M1	DOWN	Tmem214	Q8BM55	transmembrane protein 214
M1	DOWN	Cdk5rap3	Q99LM2	CDK5 regulatory subunit associated protein 3
M1	DOWN	Luc7l2	Q7TNC4	LUC7-like 2 (S. cerevisiae)
M1	DOWN	Emc7	Q9EP72	ER membrane protein complex subunit 7
M1	DOWN	Ccdc47	Q9D024	coiled-coil domain containing 47
M1	DOWN	Uqcrc1	Q9CZ13	ubiquinol-cytochrome c reductase core protein 1
M1	DOWN	Sod1	P08228	superoxide dismutase 1, soluble
M1	DOWN	Eftud2	O08810	elongation factor Tu GTP binding domain containing 2
M1	DOWN	Ncbp1	Q3UYV9	nuclear cap binding protein subunit 1
M1	DOWN	Vps29	Q9QZ88	VPS29 retromer complex component
M1	DOWN	Mtmr2	Q9Z2D1	myotubularin related protein 2
M1	DOWN	Mcrip1	Q3UGS4	MAPK regulated corepressor interacting protein 1
M1	DOWN	Ctbp2	P56546	C-terminal binding protein 2
M1	DOWN	Uqcrc2	Q9DB77	ubiquinol cytochrome c reductase core protein 2
M1	DOWN	Vav3	Q9R0C8	vav 3 oncogene
M1	DOWN	Bag1	Q60739	BCL2-associated athanogene 1
M1	DOWN	Me2	Q99KE1	malic enzyme 2, NAD(+)-dependent, mitochondrial
M1	DOWN	Dlst	Q9D2G2	dihydrolipoamide S-succinyltransferase (E2 component of 2-oxo-glutarate complex)
M1	DOWN	Rcc2	Q8BK67	regulator of chromosome condensation 2
M1	DOWN	Gpx1	P11352	glutathione peroxidase 1
M1	DOWN	Capn1	O35350	calpain 1
M1	DOWN	Ccdc93	Q7TQK5	coiled-coil domain containing 93
M1	DOWN	Nup160	Q9Z0W3	nucleoporin 160
M1	DOWN	Stxbp2	Q64324	syntaxin binding protein 2
M1	DOWN	Atp1a3	Q6PIC6	ATPase, Na+/K+ transporting, alpha 3 polypeptide
M1	DOWN	Ppm1f	Q8CGA0	protein phosphatase 1F (PP2C domain containing)
M1	DOWN	Cyb5r1	Q9DB73	cytochrome b5 reductase 1
M1	DOWN	Galnt2	Q6PB93	polypeptide N-acetylgalactosaminyltransferase 2
M1	DOWN	Qars	Q8BML9	glutaminyl-tRNA synthetase
M1	DOWN	Prune2	Q52KR3	prune homolog 2
M1	DOWN	Snrnp40	Q6PE01	small nuclear ribonucleoprotein 40 (U5)
M1	DOWN	Txnl1	Q8CDN6	thioredoxin-like 1
M1	DOWN	Rin3	P59729	Ras and Rab interactor 3
M1	DOWN	Tmed4	Q8R1V4	transmembrane p24 trafficking protein 4
M1	DOWN	Mars	Q68FL6	methionine-tRNA synthetase
M1	DOWN	Dnajc8	Q6NZB0	DnaJ heat shock protein family (Hsp40) member C8
M1	DOWN	Arhgap10	Q6Y5D8	Rho GTPase activating protein 10
M1	DOWN	Coro7	Q9D2V7	coronin 7
M1	DOWN	Pmpcb	Q9CXT8	peptidase (mitochondrial processing) beta
M1	DOWN	Pycard	Q9EPB4	PYD and CARD domain containing
M1	DOWN	Eef1d	P57776	eukaryotic translation elongation factor 1 delta (guanine nucleotide exchange protein)
M1	DOWN	Cse1l	Q9ERK4	chromosome segregation 1-like (S. cerevisiae)
M1	DOWN	Dcun1d1	Q9QZ73	DCN1, defective in cullin neddylation 1, domain containing 1 (S. cerevisiae)
M1	DOWN	Pik3r1	P26450	phosphoinositide-3-kinase regulatory subunit 1
M1	DOWN	Clic1	Q9Z1Q5	chloride intracellular channel 1
M1	DOWN	Tubb6	Q922F4	tubulin, beta 6 class V
M1	DOWN	Med1	Q925J9	mediator complex subunit 1
M1	DOWN	Cd68	P31996	CD68 antigen
M1	DOWN	NA	O09167	NA
M1	DOWN	Stoml2	Q99JB2	stomatin (Epb7.2)-like 2
M1	DOWN	Rplp1	P47955	ribosomal protein, large, P1
M1	DOWN	Sf3a3	Q9D554	splicing factor 3a, subunit 3
M1	DOWN	Mcm6	P97311	minichromosome maintenance complex component 6
M1	DOWN	Acat2	Q8CAY6	acetyl-Coenzyme A acetyltransferase 2
M1	DOWN	Vcp	Q01853	valosin containing protein
M1	DOWN	Gstm5	P48774	glutathione S-transferase, mu 5
M1	DOWN	Cggbp1	Q8BHG9	CGG triplet repeat binding protein 1
M1	DOWN	Ube2g2	P60605	ubiquitin-conjugating enzyme E2G 2
M1	DOWN	Sirpa	P97797	signal-regulatory protein alpha
M1	DOWN	Ankrd44	B2RXR6	ankyrin repeat domain 44
M1	DOWN	Plcg2	Q8CIH5	phospholipase C, gamma 2
M1	DOWN	Sgpp1	Q9JI99	sphingosine-1-phosphate phosphatase 1
M1	DOWN	NA	D3Z6Q9	NA
M1	DOWN	Hip1	Q8VD75	huntingtin interacting protein 1
M1	DOWN	Iars	Q8BU30	isoleucine-tRNA synthetase
M1	DOWN	Mapk14	P47811	mitogen-activated protein kinase 14
M1	DOWN	Ube2v1	Q9CZY3	ubiquitin-conjugating enzyme E2 variant 1
M1	DOWN	Htatsf1	Q8BGC0	HIV TAT specific factor 1
M1	DOWN	Ccdc12	Q8R344	coiled-coil domain containing 12
M1	DOWN	Tubb5	P99024	tubulin, beta 5 class I
M1	DOWN	Colgalt1	Q8K297	collagen beta(1-O)galactosyltransferase 1
M1	DOWN	Cdc42	P60766	cell division cycle 42
M1	DOWN	Apeh	Q8R146	acylpeptide hydrolase
M1	DOWN	Tpr	F6ZDS4	translocated promoter region, nuclear basket protein
M1	DOWN	Adpgk	Q8VDL4	ADP-dependent glucokinase
M1	DOWN	Lrpap1	P55302	low density lipoprotein receptor-related protein associated protein 1
M1	DOWN	Nrd1	Q8BHG1	nardilysin, N-arginine dibasic convertase, NRD convertase 1
M1	DOWN	Matr3	Q8K310	matrin 3
M1	DOWN	Mlf2	Q99KX1	myeloid leukemia factor 2
M1	DOWN	Dglucy	Q8BH86	D-glutamate cyclase
M1	DOWN	Vwa5a	Q99KC8	von Willebrand factor A domain containing 5A
M1	DOWN	Arfgef2	A2A5R2	ADP-ribosylation factor guanine nucleotide-exchange factor 2 (brefeldin A-inhibited)
M1	DOWN	Dnajc5	P60904	DnaJ heat shock protein family (Hsp40) member C5
M1	DOWN	Rpl27a	P14115	ribosomal protein L27A
M1	DOWN	Trnt1	Q8K1J6	tRNA nucleotidyl transferase, CCA-adding, 1
M1	DOWN	Slc25a24	Q8BMD8	solute carrier family 25 (mitochondrial carrier, phosphate carrier), member 24
M1	DOWN	Nemf	Q8CCP0	nuclear export mediator factor
M1	DOWN	Ctsh	P49935	cathepsin H
M1	DOWN	Ewsr1	Q61545	Ewing sarcoma breakpoint region 1
M1	DOWN	Slc25a1	Q8JZU2	solute carrier family 25 (mitochondrial carrier, citrate transporter), member 1
M1	DOWN	Eps8	Q08509	epidermal growth factor receptor pathway substrate 8
M1	DOWN	Cs	Q9CZU6	citrate synthase
M1	DOWN	NA	O88447	NA
M1	DOWN	Eef1e1	Q9D1M4	eukaryotic translation elongation factor 1 epsilon 1
M1	DOWN	Ubxn1	Q922Y1	UBX domain protein 1
M1	DOWN	NA	Q9D1G5	NA
M1	DOWN	Uba2	Q9Z1F9	ubiquitin-like modifier activating enzyme 2
M1	DOWN	Rpl4	Q9D8E6	ribosomal protein L4
M1	DOWN	Slco4a1	Q8K078	solute carrier organic anion transporter family, member 4a1
M1	DOWN	Pa2g4	P50580	proliferation-associated 2G4
M1	DOWN	Zfyve26	Q5DU37	zinc finger, FYVE domain containing 26
M1	DOWN	Dus3l	Q91XI1	dihydrouridine synthase 3-like (S. cerevisiae)
M1	DOWN	Psip1	Q99JF8	PC4 and SFRS1 interacting protein 1
M1	DOWN	Anxa5	P48036	annexin A5
M1	DOWN	Snrnp200	Q6P4T2	small nuclear ribonucleoprotein 200 (U5)
M1	DOWN	Gba	P17439	glucosidase, beta, acid
M1	DOWN	Rnf2	Q9CQJ4	ring finger protein 2
M1	DOWN	Rad23b	P54728	RAD23 homolog B, nucleotide excision repair protein
M1	DOWN	c("Srp54a", "Srp54b")	P14576	c("signal recognition particle 54A", "signal recognition particle 54B")
M1	DOWN	Spcs2	Q9CYN2	signal peptidase complex subunit 2 homolog (S. cerevisiae)
M1	DOWN	Aprt	P08030	adenine phosphoribosyl transferase
M1	DOWN	Vps4b	P46467	vacuolar protein sorting 4B
M1	DOWN	Eefsec	Q9JHW4	eukaryotic elongation factor, selenocysteine-tRNA-specific
M1	DOWN	Mrto4	Q9D0I8	mRNA turnover 4, ribosome maturation factor
M1	DOWN	Dynll2	Q9D0M5	dynein light chain LC8-type 2
M1	DOWN	Ncln	Q8VCM8	nicalin
M1	DOWN	U2af1	Q9D883	U2 small nuclear ribonucleoprotein auxiliary factor (U2AF) 1
M1	DOWN	Pcbp1	P60335	poly(rC) binding protein 1
M1	DOWN	Hspd1	P63038	heat shock protein 1 (chaperonin)
M1	DOWN	Pdia4	P08003	protein disulfide isomerase associated 4
M1	DOWN	NA	P47964	NA
M1	DOWN	Cyp20a1	Q8BKE6	cytochrome P450, family 20, subfamily a, polypeptide 1
M1	DOWN	Trappc11	B2RXC1	trafficking protein particle complex 11
M1	DOWN	Tlr7	P58681	toll-like receptor 7
M1	DOWN	Ppp1r9b	Q6R891	protein phosphatase 1, regulatory subunit 9B
M1	DOWN	Elmo1	Q8BPU7	engulfment and cell motility 1
M1	DOWN	Eif3j2	Q66JS6	eukaryotic translation initiation factor 3, subunit J2
M1	DOWN	Prune1	Q8BIW1	prune exopolyphosphatase
M1	DOWN	Pop4	Q9CR08	processing of precursor 4, ribonuclease P/MRP family, (S. cerevisiae)
M1	DOWN	Cct6a	P80317	chaperonin containing Tcp1, subunit 6a (zeta)
M1	DOWN	Nop9	Q8BMC4	NOP9 nucleolar protein
M1	DOWN	Nqo2	Q9JI75	N-ribosyldihydronicotinamide quinone reductase 2
M1	DOWN	Atp6v1a	P50516	ATPase, H+ transporting, lysosomal V1 subunit A
M1	DOWN	Akr1b8	P45377	aldo-keto reductase family 1, member B8
M1	DOWN	Pfkm	P47857	phosphofructokinase, muscle
M1	DOWN	Abcf1	Q6P542	ATP-binding cassette, sub-family F (GCN20), member 1
M1	DOWN	Hnrnpul2	Q00PI9	heterogeneous nuclear ribonucleoprotein U-like 2
M1	DOWN	Pin1	Q9QUR7	protein (peptidyl-prolyl cis/trans isomerase) NIMA-interacting 1
M1	DOWN	Snrpg	P62309	small nuclear ribonucleoprotein polypeptide G
M1	DOWN	Rab7	P51150	RAB7, member RAS oncogene family
M1	DOWN	Ccdc9	Q8VC31	coiled-coil domain containing 9
M1	DOWN	Cers2	Q924Z4	ceramide synthase 2
M1	DOWN	Slc25a5	P51881	solute carrier family 25 (mitochondrial carrier, adenine nucleotide translocator), member 5
M1	DOWN	NA	Q61316	NA
M1	DOWN	Tbcc	Q8VCN9	tubulin-specific chaperone C
M1	DOWN	Hnrnpa0	Q9CX86	heterogeneous nuclear ribonucleoprotein A0
M1	DOWN	Calu	O35887	calumenin
M1	DOWN	Grk2	Q99MK8	G protein-coupled receptor kinase 2
M1	DOWN	Capza1	P47753	capping protein (actin filament) muscle Z-line, alpha 1
M1	DOWN	Trmt112	Q9DCG9	tRNA methyltransferase 11-2
M1	DOWN	Ranbp3	Q9CT10	RAN binding protein 3
M1	DOWN	Atp5e	P56382	ATP synthase, H+ transporting, mitochondrial F1 complex, epsilon subunit
M1	DOWN	Rps15	P62843	ribosomal protein S15
M1	DOWN	NA	Q9R0Q9	NA
M1	DOWN	Bod1l	E9Q6J5	biorientation of chromosomes in cell division 1-like
M1	DOWN	Gmds	Q8K0C9	GDP-mannose 4, 6-dehydratase
M1	DOWN	Ergic2	Q9CR89	ERGIC and golgi 2
M1	DOWN	Dis3	Q9CSH3	DIS3 homolog, exosome endoribonuclease and 3'-5' exoribonuclease
M1	DOWN	Cdv3	Q4VAA2	carnitine deficiency-associated gene expressed in ventricle 3
M1	DOWN	Serpinb6a	Q60854	serine (or cysteine) peptidase inhibitor, clade B, member 6a
M1	DOWN	Rpl14	Q9CR57	ribosomal protein L14
M1	DOWN	Trappc13	Q3TIR1	trafficking protein particle complex 13
M1	DOWN	Eif5a	P63242	eukaryotic translation initiation factor 5A
M1	DOWN	Cd84	Q18PI6	CD84 antigen
M1	DOWN	Abcb1b	P06795	ATP-binding cassette, sub-family B (MDR/TAP), member 1B
M1	DOWN	NA	P53026	NA
M1	DOWN	Syncrip	Q7TMK9	synaptotagmin binding, cytoplasmic RNA interacting protein
M1	DOWN	Psph	Q99LS3	phosphoserine phosphatase
M1	DOWN	Yars	Q91WQ3	tyrosyl-tRNA synthetase
M1	DOWN	Rbm10	Q99KG3	RNA binding motif protein 10
M1	DOWN	Rpl7	P14148	ribosomal protein L7
M1	DOWN	Cstf3	Q99LI7	cleavage stimulation factor, 3' pre-RNA, subunit 3
M1	DOWN	Tvp23b	Q9D8T4	trans-golgi network vesicle protein 23B
M1	DOWN	Ptgr1	Q91YR9	prostaglandin reductase 1
M1	DOWN	Uck2	Q99PM9	uridine-cytidine kinase 2
M1	DOWN	Slc38a10	Q5I012	solute carrier family 38, member 10
M1	DOWN	Rpl15	Q9CZM2	ribosomal protein L15
M1	DOWN	Sart3	Q9JLI8	squamous cell carcinoma antigen recognized by T cells 3
M1	DOWN	Upf1	Q9EPU0	UPF1 regulator of nonsense transcripts homolog (yeast)
M1	DOWN	Acy1	Q99JW2	aminoacylase 1
M1	DOWN	Tsg101	Q61187	tumor susceptibility gene 101
M1	DOWN	Cltc	Q68FD5	clathrin, heavy polypeptide (Hc)
M1	DOWN	Alyref	O08583	Aly/REF export factor
M1	DOWN	Spag7	Q7TNE3	sperm associated antigen 7
M1	DOWN	Pon2	Q62086	paraoxonase 2
M1	DOWN	Cotl1	Q9CQI6	coactosin-like 1 (Dictyostelium)
M1	DOWN	Brox	Q8K2Q7	BRO1 domain and CAAX motif containing
M1	DOWN	Hspa9	P38647	heat shock protein 9
M1	DOWN	Cdk7	Q03147	cyclin-dependent kinase 7
M1	DOWN	Tmem168	Q91VX9	transmembrane protein 168
M1	DOWN	Ddx17	Q501J6	DEAD (Asp-Glu-Ala-Asp) box polypeptide 17
M1	DOWN	Asah1	Q9WV54	N-acylsphingosine amidohydrolase 1
M1	DOWN	Pi4kb	Q8BKC8	phosphatidylinositol 4-kinase beta
M1	DOWN	Aak1	Q3UHJ0	AP2 associated kinase 1
M1	DOWN	Ier3ip1	Q9CR20	immediate early response 3 interacting protein 1
M1	DOWN	Rpl8	P62918	ribosomal protein L8
M1	DOWN	Tmem106b	Q80X71	transmembrane protein 106B
M1	DOWN	Nubp2	Q9R061	nucleotide binding protein 2
M1	DOWN	Dgkz	Q80UP3	diacylglycerol kinase zeta
M1	DOWN	Pak2	Q8CIN4	p21 protein (Cdc42/Rac)-activated kinase 2
M1	DOWN	Tbc1d22a	Q8R5A6	TBC1 domain family, member 22a
M1	DOWN	Mta2	Q9R190	metastasis-associated gene family, member 2
M1	DOWN	Slc25a3	Q8VEM8	solute carrier family 25 (mitochondrial carrier, phosphate carrier), member 3
M1	DOWN	NA	O08585	NA
M1	DOWN	Larp7	Q05CL8	La ribonucleoprotein domain family, member 7
M1	DOWN	Huwe1	Q7TMY8	HECT, UBA and WWE domain containing 1
M1	DOWN	Atp6v1f	Q9D1K2	ATPase, H+ transporting, lysosomal V1 subunit F
M1	DOWN	Rpl9	P51410	ribosomal protein L9
M1	DOWN	Mcee	Q9D1I5	methylmalonyl CoA epimerase
M1	DOWN	Ccdc42	Q5SV66	coiled-coil domain containing 42
M1	DOWN	Snx30	Q8CE50	sorting nexin family member 30
M1	DOWN	Psmd4	O35226	proteasome (prosome, macropain) 26S subunit, non-ATPase, 4
M1	DOWN	Creg1	O88668	cellular repressor of E1A-stimulated genes 1
M1	DOWN	Pgm2l1	Q8CAA7	phosphoglucomutase 2-like 1
M1	DOWN	Gpalpp1	Q69ZC8	GPALPP motifs containing 1
M1	DOWN	Dapk1	Q80YE7	death associated protein kinase 1
M1	DOWN	Pacsin2	Q9WVE8	protein kinase C and casein kinase substrate in neurons 2
M1	DOWN	Lrrfip1	Q3UZ39	leucine rich repeat (in FLII) interacting protein 1
M1	DOWN	Prpf4b	Q61136	pre-mRNA processing factor 4B
M1	DOWN	Fkbp1a	P26883	FK506 binding protein 1a
M1	DOWN	Srrm2	Q8BTI8	serine/arginine repetitive matrix 2
M1	DOWN	Lsp1	P19973	lymphocyte specific 1
M1	DOWN	Naa50	Q6PGB6	N(alpha)-acetyltransferase 50, NatE catalytic subunit
M1	DOWN	Tprgl	Q9DBS2	transformation related protein 63 regulated like
M1	DOWN	Rpl10	Q6ZWV3	ribosomal protein L10
M1	DOWN	U2surp	Q6NV83	U2 snRNP-associated SURP domain containing
M1	DOWN	Psmd1	Q3TXS7	proteasome (prosome, macropain) 26S subunit, non-ATPase, 1
M1	DOWN	Rps10	P63325	ribosomal protein S10
M1	DOWN	Rps6ka5	Q8C050	ribosomal protein S6 kinase, polypeptide 5
M1	DOWN	Atl3	Q91YH5	atlastin GTPase 3
M1	DOWN	Fam192a	Q91WE2	family with sequence similarity 192, member A
M1	DOWN	Hmgn5	Q9JL35	high-mobility group nucleosome binding domain 5
M1	DOWN	Psmc4	P54775	proteasome (prosome, macropain) 26S subunit, ATPase, 4
M1	DOWN	Asna1	O54984	arsA arsenite transporter, ATP-binding, homolog 1 (bacterial)
M1	DOWN	Hibch	Q8QZS1	3-hydroxyisobutyryl-Coenzyme A hydrolase
M1	DOWN	Rpl28	P41105	ribosomal protein L28
M1	DOWN	Nudt3	Q9JI46	nudix (nucleotide diphosphate linked moiety X)-type motif 3
M1	DOWN	Vps26a	P40336	VPS26 retromer complex component A
M1	DOWN	Exoc3	Q6KAR6	exocyst complex component 3
M1	DOWN	Acly	Q91V92	ATP citrate lyase
M1	DOWN	Rpl26	P61255	ribosomal protein L26
M1	DOWN	Cct2	P80314	chaperonin containing Tcp1, subunit 2 (beta)
M1	DOWN	Ppwd1	Q8CEC6	peptidylprolyl isomerase domain and WD repeat containing 1
M1	DOWN	Rpl7a	P12970	ribosomal protein L7A
M1	DOWN	NA	P08556	NA
M1	DOWN	Tmem43	Q9DBS1	transmembrane protein 43
M1	DOWN	Cyc1	Q9D0M3	cytochrome c-1
M1	DOWN	Rpl13	P47963	ribosomal protein L13
M1	DOWN	Prkar2b	P31324	protein kinase, cAMP dependent regulatory, type II beta
M1	DOWN	Abcc3	B2RX12	ATP-binding cassette, sub-family C (CFTR/MRP), member 3
M1	DOWN	Serbp1	Q9CY58	serpine1 mRNA binding protein 1
M1	DOWN	Rab8a	P55258	RAB8A, member RAS oncogene family
M1	DOWN	Hnrnph1	O35737	heterogeneous nuclear ribonucleoprotein H1
M1	DOWN	Chst14	Q80V53	carbohydrate (N-acetylgalactosamine 4-0) sulfotransferase 14
M1	DOWN	Cct7	P80313	chaperonin containing Tcp1, subunit 7 (eta)
M1	DOWN	Gnb1	P62874	guanine nucleotide binding protein (G protein), beta 1
M1	DOWN	Fsd1l	Q8BYN5	fibronectin type III and SPRY domain containing 1-like
M1	DOWN	Kif2a	P28740	kinesin family member 2A
M1	DOWN	c("Rpl27", "LOC108167922")	P61358	c("ribosomal protein L27", "60S ribosomal protein L27")
M1	DOWN	Arhgap22	Q8BL80	Rho GTPase activating protein 22
M1	DOWN	Washc4	Q3UMB9	WASH complex subunit 4
M1	DOWN	Apobec1	P51908	apolipoprotein B mRNA editing enzyme, catalytic polypeptide 1
M1	DOWN	Tomm40	Q9QYA2	translocase of outer mitochondrial membrane 40 homolog (yeast)
M1	DOWN	Usp47	Q8BY87	ubiquitin specific peptidase 47
M1	DOWN	NA	Q3TLI0	NA
M1	DOWN	Sin3a	Q60520	transcriptional regulator, SIN3A (yeast)
M1	DOWN	Rpl31	P62900	ribosomal protein L31
M1	DOWN	Taldo1	Q93092	transaldolase 1
M1	DOWN	Rplp2	P99027	ribosomal protein, large P2
M1	DOWN	Ppil2	Q9D787	peptidylprolyl isomerase (cyclophilin)-like 2
M1	DOWN	Nars	Q8BP47	asparaginyl-tRNA synthetase
M1	DOWN	Nrbf2	Q8VCQ3	nuclear receptor binding factor 2
M1	DOWN	Nasp	Q99MD9	nuclear autoantigenic sperm protein (histone-binding)
M1	DOWN	Rdh11	Q9QYF1	retinol dehydrogenase 11
M1	DOWN	Dnm2	P39054	dynamin 2
M1	DOWN	Bcas2	Q9D287	breast carcinoma amplified sequence 2
M1	DOWN	Ddx19a	Q61655	DEAD (Asp-Glu-Ala-Asp) box polypeptide 19a
M1	DOWN	Cct3	P80318	chaperonin containing Tcp1, subunit 3 (gamma)
M1	DOWN	Actr1b	Q8R5C5	ARP1 actin-related protein 1B, centractin beta
M1	DOWN	Ugt1a7c	Q6ZQM8	UDP glucuronosyltransferase 1 family, polypeptide A7C
M1	DOWN	Gng2	P63213	guanine nucleotide binding protein (G protein), gamma 2
M1	DOWN	Mthfd1l	Q3V3R1	methylenetetrahydrofolate dehydrogenase (NADP+ dependent) 1-like
M1	DOWN	Dlg1	Q811D0	discs large MAGUK scaffold protein 1
M1	DOWN	Rab8b	P61028	RAB8B, member RAS oncogene family
M1	DOWN	Eif2s2	Q99L45	eukaryotic translation initiation factor 2, subunit 2 (beta)
M1	DOWN	Cct4	P80315	chaperonin containing Tcp1, subunit 4 (delta)
M1	DOWN	Ap1m1	P35585	adaptor-related protein complex AP-1, mu subunit 1
M1	DOWN	c("Rpl29", "Gm8210")	P47915	c("ribosomal protein L29", "predicted pseudogene 8210")
M1	DOWN	Actr1a	P61164	ARP1 actin-related protein 1A, centractin alpha
M1	DOWN	Flvcr1	B2RXV4	feline leukemia virus subgroup C cellular receptor 1
M1	DOWN	NA	Q00262	NA
M1	DOWN	Wdfy3	Q6VNB8	WD repeat and FYVE domain containing 3
M1	DOWN	Prkag1	O54950	protein kinase, AMP-activated, gamma 1 non-catalytic subunit
M1	DOWN	Mbd3	Q9Z2D8	methyl-CpG binding domain protein 3
M1	DOWN	Smpdl3a	P70158	sphingomyelin phosphodiesterase, acid-like 3A
M1	DOWN	Slc25a20	Q9Z2Z6	solute carrier family 25 (mitochondrial carnitine/acylcarnitine translocase), member 20
M1	DOWN	Rwdd1	Q9CQK7	RWD domain containing 1
M1	DOWN	Rps19	Q9CZX8	ribosomal protein S19
M1	DOWN	Birc6	O88738	baculoviral IAP repeat-containing 6
M1	DOWN	Pdxdc1	Q99K01	pyridoxal-dependent decarboxylase domain containing 1
M1	DOWN	Ubap2l	Q80X50	ubiquitin-associated protein 2-like
M1	DOWN	Eif4a3	Q91VC3	eukaryotic translation initiation factor 4A3
M1	DOWN	P4hb	P09103	prolyl 4-hydroxylase, beta polypeptide
M1	DOWN	Eif3l	Q8QZY1	eukaryotic translation initiation factor 3, subunit L
M1	DOWN	NA	Q6ZPY7	NA
M1	DOWN	NA	Q9QXG2	NA
M1	DOWN	Cdc5l	Q6A068	cell division cycle 5-like (S. pombe)
M1	DOWN	Tmed10	Q9D1D4	transmembrane p24 trafficking protein 10
M1	DOWN	Pafah1b2	Q61206	platelet-activating factor acetylhydrolase, isoform 1b, subunit 2
M1	DOWN	Stx8	O88983	syntaxin 8
M1	DOWN	Atp6v0d1	P51863	ATPase, H+ transporting, lysosomal V0 subunit D1
M1	DOWN	Ppm1g	Q61074	protein phosphatase 1G (formerly 2C), magnesium-dependent, gamma isoform
M1	DOWN	Psap	Q61207	prosaposin
M2	UP	NA	Q6QLQ4	NA
M2	UP	NA	P05017-2	NA
M2	UP	Cblb	Q3TTA7	Casitas B-lineage lymphoma b
M2	UP	NA	Q3USJ8-2	NA
M2	UP	Smap2	Q7TN29	small ArfGAP 2
M2	UP	Daglb	Q91WC9	diacylglycerol lipase, beta
M2	UP	Atp6v0d2	Q80SY3	ATPase, H+ transporting, lysosomal V0 subunit D2
M2	UP	Gatm	Q9D964	glycine amidinotransferase (L-arginine:glycine amidinotransferase)
M2	UP	Plaur	P35456	plasminogen activator, urokinase receptor
M2	UP	Myo1e	E9Q634	myosin IE
M2	UP	Plxnd1	Q3UH93	plexin D1
M2	UP	Elmo2	Q8BHL5	engulfment and cell motility 2
M2	UP	Ak2	Q9WTP6	adenylate kinase 2
M2	UP	Lrmp	Q60664	lymphoid-restricted membrane protein
M2	UP	Bag3	Q9JLV1	BCL2-associated athanogene 3
M2	UP	Nes	Q6P5H2	nestin
M2	UP	Hfe	P70387	hemochromatosis
M2	UP	Arl4c	P61208	ADP-ribosylation factor-like 4C
M2	UP	NA	Q9JM52-3	NA
M2	UP	Fyn	P39688	Fyn proto-oncogene
M2	UP	Prkcd	P28867	protein kinase C, delta
M2	UP	Lpxn	Q99N69	leupaxin
M2	UP	Cyth4	Q80YW0	cytohesin 4
M2	UP	Ttc27	Q8CD92	tetratricopeptide repeat domain 27
M2	UP	Cbl	P22682	Casitas B-lineage lymphoma
M2	UP	Xdh	Q00519	xanthine dehydrogenase
M2	UP	Sh3kbp1	Q8R550	SH3-domain kinase binding protein 1
M2	UP	NA	Q9JLB0-2	NA
M2	UP	Asap1	Q9QWY8	ArfGAP with SH3 domain, ankyrin repeat and PH domain1
M2	UP	Mmp12	P34960	matrix metallopeptidase 12
M2	UP	Pde12	Q3TIU4	phosphodiesterase 12
M2	UP	Cluh	Q5SW19	clustered mitochondria (cluA/CLU1) homolog
M2	UP	Pip5k1c	O70161	phosphatidylinositol-4-phosphate 5-kinase, type 1 gamma
M2	UP	Baiap2	Q8BKX1	brain-specific angiogenesis inhibitor 1-associated protein 2
M2	UP	Mgat1	P27808	mannoside acetylglucosaminyltransferase 1
M2	UP	Dse	Q8BLI4	dermatan sulfate epimerase
M2	UP	Tep1	P97499	telomerase associated protein 1
M2	UP	Arhgap25	Q8BYW1	Rho GTPase activating protein 25
M2	UP	Arhgap31	A6X8Z5	Rho GTPase activating protein 31
M2	UP	NA	Q8CII9-3	NA
M2	UP	Arhgap6	O54834	Rho GTPase activating protein 6
M2	UP	Mafb	P54841	v-maf musculoaponeurotic fibrosarcoma oncogene family, protein B (avian)
M2	UP	Fam129b	Q8R1F1	family with sequence similarity 129, member B
M2	UP	Anxa1	P10107	annexin A1
M2	UP	Ctnna1	P26231	catenin (cadherin associated protein), alpha 1
M2	UP	Stap1	Q9JM90	signal transducing adaptor family member 1
M2	UP	Clec10a	P49300	C-type lectin domain family 10, member A
M2	UP	Mat2a	Q3THS6	methionine adenosyltransferase II, alpha
M2	UP	Arhgap12	Q8C0D4	Rho GTPase activating protein 12
M2	UP	Tns3	Q5SSZ5	tensin 3
M2	UP	NA	Q9Z2H5-2	NA
M2	UP	B3glct	Q8BHT6	beta-3-glucosyltransferase
M2	UP	Sacm1l	Q9EP69	SAC1 suppressor of actin mutations 1-like (yeast)
M2	UP	Hsph1	Q61699	heat shock 105kDa/110kDa protein 1
M2	UP	Agpat3	Q9D517	1-acylglycerol-3-phosphate O-acyltransferase 3
M2	UP	Vwa5a	Q99KC8	von Willebrand factor A domain containing 5A
M2	UP	Actn1	Q7TPR4	actinin, alpha 1
M2	UP	Nptn	P97300	neuroplastin
M2	UP	NA	A6H8H2-2	NA
M2	UP	Ehbp1l1	Q99MS7	EH domain binding protein 1-like 1
M2	UP	NA	Q8C078-2	NA
M2	UP	Prcp	Q7TMR0	prolylcarboxypeptidase (angiotensinase C)
M2	UP	Arhgap10	Q6Y5D8	Rho GTPase activating protein 10
M2	UP	Ppp1r9b	Q6R891	protein phosphatase 1, regulatory subunit 9B
M2	UP	Arih1	Q9Z1K5	ariadne RBR E3 ubiquitin protein ligase 1
M2	UP	Rars2	Q3U186	arginyl-tRNA synthetase 2, mitochondrial
M2	UP	Myof	Q69ZN7	myoferlin
M2	UP	Otulin	Q3UCV8	OTU deubiquitinase with linear linkage specificity
M2	UP	Grcc10	O35127	gene rich cluster, C10 gene
M2	UP	Pdlim5	Q8CI51	PDZ and LIM domain 5
M2	UP	Nek7	Q9ES74	NIMA (never in mitosis gene a)-related expressed kinase 7
M2	UP	Ano6	Q6P9J9	anoctamin 6
M2	UP	Iah1	Q9DB29	isoamyl acetate-hydrolyzing esterase 1 homolog
M2	UP	Ddx54	Q8K4L0	DEAD (Asp-Glu-Ala-Asp) box polypeptide 54
M2	UP	Usp19	Q3UJD6	ubiquitin specific peptidase 19
M2	UP	Mitf	Q08874	melanogenesis associated transcription factor
M2	UP	Nop16	Q9CPT5	NOP16 nucleolar protein
M2	UP	Apex1	P28352	apurinic/apyrimidinic endonuclease 1
M2	UP	Oxct1	Q9D0K2	3-oxoacid CoA transferase 1
M2	UP	NA	Q7M6Y3-5	NA
M2	UP	Snx1	Q9WV80	sorting nexin 1
M2	UP	Tbxas1	P36423	thromboxane A synthase 1, platelet
M2	UP	Abhd16a	Q9Z1Q2	abhydrolase domain containing 16A
M2	UP	Iscu	Q9D7P6	iron-sulfur cluster assembly enzyme
M2	UP	Evl	P70429	Ena-vasodilator stimulated phosphoprotein
M2	UP	Ado	Q6PDY2	2-aminoethanethiol (cysteamine) dioxygenase
M2	UP	Eif5a	P63242	eukaryotic translation initiation factor 5A
M2	UP	NA	Q99MS7-2	NA
M2	UP	NA	Q9WU81-2	NA
M2	UP	NA	Q61656	NA
M2	UP	Cisd1	Q91WS0	CDGSH iron sulfur domain 1
M2	UP	2018-09-09	Q80UG5	septin 9
M2	UP	Lrpprc	Q6PB66	leucine-rich PPR-motif containing
M2	UP	2310011J03Rik	Q9D7E4	RIKEN cDNA 2310011J03 gene
M2	UP	Pald1	P70261	phosphatase domain containing, paladin 1
M2	UP	Dus3l	Q91XI1	dihydrouridine synthase 3-like (S. cerevisiae)
M2	UP	Hvcn1	Q3U2S8	hydrogen voltage-gated channel 1
M2	UP	Eif3k	Q9DBZ5	eukaryotic translation initiation factor 3, subunit K
M2	UP	Chil3	O35744	chitinase-like 3
M2	UP	Myo1g	Q5SUA5	myosin IG
M2	UP	Txn2	P97493	thioredoxin 2
M2	UP	Cltc	Q68FD5	clathrin, heavy polypeptide (Hc)
M2	UP	Mapkapk3	Q3UMW7	mitogen-activated protein kinase-activated protein kinase 3
M2	UP	Qdpr	Q8BVI4	quinoid dihydropteridine reductase
M2	UP	Vcl	Q64727	vinculin
M2	UP	Stt3b	Q3TDQ1	STT3, subunit of the oligosaccharyltransferase complex, homolog B (S. cerevisiae)
M2	UP	Selenoo	Q9DBC0	selenoprotein O
M2	UP	NA	Q9WTI7-3	NA
M2	UP	Gtpbp4	Q99ME9	GTP binding protein 4
M2	UP	Hnrnpll	Q921F4	heterogeneous nuclear ribonucleoprotein L-like
M2	UP	Ensa	P60840	endosulfine alpha
M2	UP	Dnaja3	Q99M87	DnaJ heat shock protein family (Hsp40) member A3
M2	UP	Acot11	Q8VHQ9	acyl-CoA thioesterase 11
M2	UP	Cd44	P15379	CD44 antigen
M2	UP	Cd72	P21855	CD72 antigen
M2	UP	Trmt61a	Q80XC2	tRNA methyltransferase 61A
M2	UP	Itgb2	P11835	integrin beta 2
M2	UP	Nolc1	E9Q5C9	nucleolar and coiled-body phosphoprotein 1
M2	UP	Smpd2	O70572	sphingomyelin phosphodiesterase 2, neutral
M2	UP	Abcg1	Q64343	ATP binding cassette subfamily G member 1
M2	UP	Srsf9	Q9D0B0	serine/arginine-rich splicing factor 9
M2	UP	Ptpmt1	Q66GT5	protein tyrosine phosphatase, mitochondrial 1
M2	UP	NA	Q61316	NA
M2	UP	Bcap29	Q61334	B cell receptor associated protein 29
M2	UP	Pcbp2	Q61990	poly(rC) binding protein 2
M2	UP	Crat	P47934	carnitine acetyltransferase
M2	UP	Plekha3	Q9ERS4	pleckstrin homology domain-containing, family A (phosphoinositide binding specific) member 3
M2	UP	Rrp12	Q6P5B0	ribosomal RNA processing 12 homolog (S. cerevisiae)
M2	UP	Metap2	O08663	methionine aminopeptidase 2
M2	UP	Rars	Q9D0I9	arginyl-tRNA synthetase
M2	UP	Mrps35	Q8BJZ4	mitochondrial ribosomal protein S35
M2	UP	Pak2	Q8CIN4	p21 protein (Cdc42/Rac)-activated kinase 2
M2	UP	Eef2	P58252	eukaryotic translation elongation factor 2
M2	UP	Csk	P41241	c-src tyrosine kinase
M2	UP	Cul4a	Q3TCH7	cullin 4A
M2	UP	Ipo7	Q9EPL8	importin 7
M2	UP	Atic	Q9CWJ9	5-aminoimidazole-4-carboxamide ribonucleotide formyltransferase/IMP cyclohydrolase
M2	UP	Arl6ip5	Q8R5J9	ADP-ribosylation factor-like 6 interacting protein 5
M2	UP	NA	P16110	NA
M2	UP	Clptm1	Q8VBZ3	cleft lip and palate associated transmembrane protein 1
M2	UP	Evi2a	P20934	ecotropic viral integration site 2a
M2	UP	Purb	O35295	purine rich element binding protein B
M2	UP	Triap1	Q9D8Z2	TP53 regulated inhibitor of apoptosis 1
M2	UP	Tfe3	Q64092	transcription factor E3
M2	UP	Lima1	Q9ERG0	LIM domain and actin binding 1
M2	UP	Nagk	Q9QZ08	N-acetylglucosamine kinase
M2	UP	Zpr1	Q62384	ZPR1 zinc finger
M2	UP	Colgalt1	Q8K297	collagen beta(1-O)galactosyltransferase 1
M2	UP	NA	Q9WV70	NA
M2	UP	Atp5c1	Q91VR2	ATP synthase, H+ transporting, mitochondrial F1 complex, gamma polypeptide 1
M2	UP	Vipas39	Q8BGQ1	VPS33B interacting protein, apical-basolateral polarity regulator, spe-39 homolog
M2	UP	c("Gng5", "Gng5-ps")	Q80SZ7	c("guanine nucleotide binding protein (G protein), gamma 5", "G protein subunit gamma 5, pseudogene")
M2	UP	Fbxo6	Q9QZN4	F-box protein 6
M2	UP	Trap1	Q9CQN1	TNF receptor-associated protein 1
M2	UP	Pmm2	Q9Z2M7	phosphomannomutase 2
M2	UP	Ldah	Q8BVA5	lipid droplet associated hydrolase
M2	UP	NA	Q9D8Y0	NA
M2	UP	Coa3	Q9D2R6	cytochrome C oxidase assembly factor 3
M2	UP	Nob1	Q8BW10	NIN1/RPN12 binding protein 1 homolog
M2	UP	Eif1ad	Q3THJ3	eukaryotic translation initiation factor 1A domain containing
M2	UP	Erp29	P57759	endoplasmic reticulum protein 29
M2	UP	Eif1	P48024	eukaryotic translation initiation factor 1
M2	UP	NA	O35658	NA
M2	UP	Pfkp	Q9WUA3	phosphofructokinase, platelet
M2	UP	Slirp	Q9D8T7	SRA stem-loop interacting RNA binding protein
M2	UP	Surf6	P70279	surfeit gene 6
M2	UP	Tln1	P26039	talin 1
M2	UP	Eif3b	Q8JZQ9	eukaryotic translation initiation factor 3, subunit B
M2	UP	Mybbp1a	Q7TPV4	MYB binding protein (P160) 1a
M2	UP	Rheb	Q921J2	Ras homolog enriched in brain
M2	UP	Cnpy3	Q9DAU1	canopy FGF signaling regulator 3
M2	UP	NA	P83741-3	NA
M2	UP	Snd1	Q78PY7	staphylococcal nuclease and tudor domain containing 1
M2	UP	Rack1	P68040	receptor for activated C kinase 1
M2	UP	Adprhl2	Q8CG72	ADP-ribosylhydrolase like 2
M2	UP	Ptgs1	P22437	prostaglandin-endoperoxide synthase 1
M2	UP	Nubp2	Q9R061	nucleotide binding protein 2
M2	UP	Gfm1	Q8K0D5	G elongation factor, mitochondrial 1
M2	UP	Ncf4	P97369	neutrophil cytosolic factor 4
M2	UP	Ppp1r18	Q8BQ30	protein phosphatase 1, regulatory subunit 18
M2	UP	Pofut2	Q8VHI3	protein O-fucosyltransferase 2
M2	UP	Naca	P70670	nascent polypeptide-associated complex alpha polypeptide
M2	UP	Thumpd3	P97770	THUMP domain containing 3
M2	UP	G3bp1	P97855	GTPase activating protein (SH3 domain) binding protein 1
M2	UP	Fnta	Q61239	farnesyltransferase, CAAX box, alpha
M2	UP	Apbb1ip	Q8R5A3	amyloid beta (A4) precursor protein-binding, family B, member 1 interacting protein
M2	UP	Adcy7	P51829	adenylate cyclase 7
M2	UP	Abcf1	Q6P542	ATP-binding cassette, sub-family F (GCN20), member 1
M2	UP	Eif3i	Q9QZD9	eukaryotic translation initiation factor 3, subunit I
M2	UP	Capn1	O35350	calpain 1
M2	UP	Cct4	P80315	chaperonin containing Tcp1, subunit 4 (delta)
M2	UP	Eif3a	P23116	eukaryotic translation initiation factor 3, subunit A
M2	UP	Otud4	B2RRE7	OTU domain containing 4
M2	UP	NA	Q9R0Q9	NA
M2	UP	Unc119b	Q8C4B4	unc-119 lipid binding chaperone B
M2	UP	Sgpp1	Q9JI99	sphingosine-1-phosphate phosphatase 1
M2	UP	Csnk1a1	Q8BK63	casein kinase 1, alpha 1
M2	UP	Cnih4	Q9CX13	cornichon family AMPA receptor auxiliary protein 4
M2	UP	Eef1g	Q9D8N0	eukaryotic translation elongation factor 1 gamma
M2	UP	Nfkb1	P25799	nuclear factor of kappa light polypeptide gene enhancer in B cells 1, p105
M2	UP	Adam9	Q61072	a disintegrin and metallopeptidase domain 9 (meltrin gamma)
M2	UP	Lman2	Q9DBH5	lectin, mannose-binding 2
M2	UP	Atp5d	Q9D3D9	ATP synthase, H+ transporting, mitochondrial F1 complex, delta subunit
M2	UP	Ctsz	Q9WUU7	cathepsin Z
M2	UP	Cct2	P80314	chaperonin containing Tcp1, subunit 2 (beta)
M2	UP	Rpl9	P51410	ribosomal protein L9
M2	UP	Eif3j2	Q66JS6	eukaryotic translation initiation factor 3, subunit J2
M2	UP	NA	P63323	NA
M2	UP	Grwd1	Q810D6	glutamate-rich WD repeat containing 1
M2	UP	Rps15a	P62245	ribosomal protein S15A
M2	UP	Rdh13	Q8CEE7	retinol dehydrogenase 13 (all-trans and 9-cis)
M2	UP	Tnip1	Q9WUU8	TNFAIP3 interacting protein 1
M2	UP	NA	Q8BTY2	NA
M2	UP	Prkar1a	Q9DBC7	protein kinase, cAMP dependent regulatory, type I, alpha
M2	UP	Capza2	P47754	capping protein (actin filament) muscle Z-line, alpha 2
M2	UP	Plp2	Q9R1Q7	proteolipid protein 2
M2	DOWN	NA	P35441	NA
M2	DOWN	Itm2b	O89051	integral membrane protein 2B
M2	DOWN	Cdkn1b	P46414	cyclin-dependent kinase inhibitor 1B
M2	DOWN	Sash1	P59808	SAM and SH3 domain containing 1
M2	DOWN	Arhgap24	Q8C4V1	Rho GTPase activating protein 24
M2	DOWN	Itpr3	P70227	inositol 1,4,5-triphosphate receptor 3
M2	DOWN	Ifitm3	Q9CQW9	interferon induced transmembrane protein 3
M2	DOWN	Ifnar2	O35664	interferon (alpha and beta) receptor 2
M2	DOWN	Sh3bp5	Q9Z131	SH3-domain binding protein 5 (BTK-associated)
M2	DOWN	Cd14	P10810	CD14 antigen
M2	DOWN	Plod1	Q9R0E2	procollagen-lysine, 2-oxoglutarate 5-dioxygenase 1
M2	DOWN	Lyn	P25911	LYN proto-oncogene, Src family tyrosine kinase
M2	DOWN	NA	Q91YI4-2	NA
M2	DOWN	Ncf1	Q09014	neutrophil cytosolic factor 1
M2	DOWN	Pstpip1	P97814	proline-serine-threonine phosphatase-interacting protein 1
M2	DOWN	Pid1	Q3UBG2	phosphotyrosine interaction domain containing 1
M2	DOWN	Mpp1	P70290	membrane protein, palmitoylated
M2	DOWN	Msr1	P30204	macrophage scavenger receptor 1
M2	DOWN	Cat	P24270	catalase
M2	DOWN	Basp1	Q91XV3	brain abundant, membrane attached signal protein 1
M2	DOWN	NA	P52332	NA
M2	DOWN	NA	Q91ZR2	NA
M2	DOWN	Glyr1	Q922P9	glyoxylate reductase 1 homolog (Arabidopsis)
M2	DOWN	NA	O88842	NA
M2	DOWN	Skap2	Q3UND0	src family associated phosphoprotein 2
M2	DOWN	Emb	P21995	embigin
M2	DOWN	Stom	P54116	stomatin
M2	DOWN	Ing1	Q9QXV3	inhibitor of growth family, member 1
M2	DOWN	Sumo1	P63166	small ubiquitin-like modifier 1
M2	DOWN	Serpinb8	O08800	serine (or cysteine) peptidase inhibitor, clade B, member 8
M2	DOWN	Sh3gl1	Q62419	SH3-domain GRB2-like 1
M2	DOWN	Rala	P63321	v-ral simian leukemia viral oncogene A (ras related)
M2	DOWN	Ralb	Q9JIW9	v-ral simian leukemia viral oncogene B
M2	DOWN	Pxk	Q8BX57	PX domain containing serine/threonine kinase
M2	DOWN	Ampd3	O08739	adenosine monophosphate deaminase 3
M2	DOWN	Msrb1	Q9JLC3	methionine sulfoxide reductase B1
M2	DOWN	Hmox2	O70252	heme oxygenase 2
M2	DOWN	Slc11a1	P41251	solute carrier family 11 (proton-coupled divalent metal ion transporters), member 1
M2	DOWN	Gbe1	Q9D6Y9	glucan (1,4-alpha-), branching enzyme 1
M2	DOWN	Clec4n	Q9JKF4	C-type lectin domain family 4, member n
M2	DOWN	Dok3	Q9QZK7	docking protein 3
M2	DOWN	NA	O70133-2	NA
M2	DOWN	Oxsr1	Q6P9R2	oxidative-stress responsive 1
M2	DOWN	Ugdh	O70475	UDP-glucose dehydrogenase
M2	DOWN	Stk26	Q99JT2	serine/threonine kinase 26
M2	DOWN	Ugp2	Q91ZJ5	UDP-glucose pyrophosphorylase 2
M2	DOWN	Spp1	P10923	secreted phosphoprotein 1
M2	DOWN	Hacd2	Q9D3B1	3-hydroxyacyl-CoA dehydratase 2
[truncated: 468 more rows]

## Sheet: Intracellular Metabolomics
Subtype	Expr	Marker
M0	UP	L-CYSTINE
M0	UP	CYTOSINE
M0	UP	L-ARGININE
M0	UP	THYMIDINE
M0	UP	L-METHIONINE
M0	UP	1-METHYLADENOSINE
M0	UP	THYMINE
M0	UP	L-TRYPTOPHAN
M0	UP	4-HYDROXY-L-PROLINE
M0	UP	L-LEUCINE
M0	UP	CYTIDINE
M0	UP	DEOXYCYTIDINE
M0	DOWN	4-AMINOBUTANOATE
M0	DOWN	GLYCEROL 2-PHOSPHATE
M0	DOWN	SN-GLYCEROL 3-PHOSPHATE
M0	DOWN	S-5-ADENOSYL-L-HOMOCYSTEINE
M0	DOWN	DEOXYADENOSINE MONOPHOSPHATE
M1	UP	AICAR
M1	UP	CITRULLINE
M1	UP	INOSINE
M1	UP	CITRULLINE
M1	UP	HYPOXANTHINE
M1	UP	D-FRUCTOSE 6-PHOSPHATE
M1	UP	ALPHA-D-GLUCOSE 1-PHOSPHATE
M1	UP	CYTIDINE 5-DIPHOSPHOCHOLINE
M1	UP	GUANOSINE 5-DIPHOSPHATE
M1	UP	A-D-GALACTOSE 1-PHOSPHATE
M1	UP	GUANOSINE 5-DIPHOSPHOGLUCOSE
M1	UP	CYTIDINE 5-DIPHOSPHOCHOLINE
M1	UP	HYPOXANTHINE
M1	UP	A-D-GLUCOSE-6-PHOSPHATE
M1	UP	GUANOSINE 5-DIPHOSPHATE
M1	UP	GUANOSINE
M1	UP	GLYCEROL 2-PHOSPHATE
M1	UP	URIDINE 5-DIPHOSPHOGLUCOSE
M1	UP	SN-GLYCEROL 3-PHOSPHATE
M1	UP	D-GLUCONIC ACID
M1	UP	INOSINE 5-PHOSPHATE
M1	UP	D-FRUCTOSE 6-PHOSPHATE
M1	UP	FRUCTOSE 1,6-BIPHOSPHATE
M1	UP	XANTHINE
M1	UP	XANTHOSINE
M1	UP	ADENOSINE 3-5-DIPHOSPHATE
M1	UP	A-D-GLUCOSE-6-PHOSPHATE
M1	UP	S-5-ADENOSYL-L-HOMOCYSTEINE
M1	UP	GUANOSINE 5-MONOPHOSPHATE
M1	UP	URACIL
M1	UP	GLYCERALDEHYDE
M1	UP	LACTATE
M1	UP	CYTIDINE 5-DIPHOSPHATE
M1	UP	ADENOSINE 5-DIPHOSPHATE
M1	DOWN	CYTOSINE
M1	DOWN	THYMINE
M1	DOWN	N-PHOSPHOCREATINE
M1	DOWN	1-METHYLADENOSINE
M1	DOWN	PHOSPHOCREATINE
M1	DOWN	THYMIDINE
M1	DOWN	N-ACETYL-D-GLUCOSAMINE
M1	DOWN	ALPHA-D-GLUCOSE 1-PHOSPHATE
M1	DOWN	L-ASPARTATE
M1	DOWN	SPERMINE
M1	DOWN	BIOTIN
M1	DOWN	URIDINE
M1	DOWN	A-N-ACETYL-L-LYSINE
M1	DOWN	URATE
M1	DOWN	3-HYDROXYKYNURENINE
M1	DOWN	L-PROLINE
M1	DOWN	PYRIDOXAMINE
M1	DOWN	GLYCERALDEHYDE
M1	DOWN	XANTHOSINE
M1	DOWN	URIDINE-5-MONOPHOSPHATE
M1	DOWN	ANTHRANILATE
M1	DOWN	L-CYSTEINE
M1	DOWN	L-LYSINE
M1	DOWN	L-LYSINE
M1	DOWN	URATE
M1	DOWN	STEARATE
M1	DOWN	L-PHENYLALANINE
M1	DOWN	1-METHYL-L-HISTIDINE
M1	DOWN	4-PYRIDOXATE
M1	DOWN	N-ACETYL-DL-SERINE
M1	DOWN	PYRIDOXINE
M2	UP	PHENYLPYRUVIC ACID
M2	UP	N-PHOSPHOCREATINE
M2	UP	D-ORNITHINE
M2	UP	L-ORNITHINE
M2	UP	PHOSPHOCREATINE
M2	UP	PYRIDOXAL 5-PHOSPHATE
M2	UP	BETA-ALANINE
M2	UP	O-ACETYL-L-CARNITINE
M2	UP	L-CARNITINE
M2	UP	SARCOSINE
M2	UP	L-ALANINE
M2	UP	CREATINE
M2	UP	NAD
M2	DOWN	L-ARGININE
M2	DOWN	N-ACETYL-L-ASPARAGINE
M2	DOWN	L-ARGININE
M2	DOWN	XANTHINE
M2	DOWN	XANTHOSINE
M2	DOWN	SPERMIDINE
M2	DOWN	L-GLUTAMINE
TAM	UP	4-PYRIDOXATE
TAM	UP	OROTATE
TAM	UP	SEROTONIN
TAM	UP	L-PROLINE
TAM	UP	DL-ISOCITRIC ACID
TAM	UP	CITRATE
TAM	UP	4-PYRIDOXATE
TAM	UP	L-PROLINE
TAM	DOWN	DEOXYCYTIDINE
TAM	DOWN	CYTIDINE 5-DIPHOSPHOCHOLINE

## Sheet: Exracellular Metabolomics
Marker
1-METHYLADENOSINE
2_DEOXY-D-RIBOSE
4-HYDROXY-L-PROLINE
4-PYRIDOXATE
5-DEOXYADENOSINE
5-METHYLCYTOSINE
A-D-GALACTOSE 1-PHOSPHATE
ADENINE
ALPHA-D-GLUCOSE 1-PHOSPHATE
BIOTIN
CITRATE
CITRULLINE
CREATINE
CYTIDINE
CYTOSINE
D-CELLOBIOSE
D-FRUCTOSE 6-PHOSPHATE
D-ORNITHINE
DEOXYCYTIDINE
DEOXYURIDINE
DL-ISOCITRIC ACID
GLYCERALDEHYDE
GUANOSINE
HYPOXANTHINE
L-ALANINE
L-ARGININE
L-GLUTAMIC ACID
L-GLUTAMINE
L-METHIONINE
L-ORNITHINE
L-PROLINE
MALATE
N-ACETYL-L-ASPARAGINE
N-PHOSPHOCREATINE
O-ACETYL-L-CARNITINE
PURVIC ACID
PYRIDINE-2,3-DICARBOXYLATE
PYRIDOXAMINE
S-5-ADENOSYL-L-HOMOCYSTEINE
SEROTONIN
SUCCINATE
THYMIDINE
THYMINE
URATE
URIDINE
XANTHINE
