# Supplementary material for: Multiomic characterization of pancreatic cancer-associated macrophage polarization reveals deregulated metabolic programs driven by the GM-CSF–PI3K pathway
Source: eLife. 2022 Feb 14;11:e73796. doi: 10.7554/eLife.73796 (PMC8843093; doi:10.7554/eLife.73796)
Supplement: Supplementary file 2. [file elife-73796-supp2.xlsx]

## Sheet: ranked_gene_list_TEM_vs_Rest
NAME	TITLE	SCORE
TNFSF14	TNF superfamily member 14 [Source:HGNC Symbol;Acc:HGNC:11930]	4.5858
CAMKK1	calcium/calmodulin dependent protein kinase kinase 1 [Source:HGNC Symbol;Acc:HGNC:1469]	4.56896
HS3ST3B1	heparan sulfate-glucosamine 3-sulfotransferase 3B1 [Source:HGNC Symbol;Acc:HGNC:5198]	4.49356
SELP	selectin P [Source:HGNC Symbol;Acc:HGNC:10721]	4.48243
FLYWCH2	FLYWCH family member 2 [Source:HGNC Symbol;Acc:HGNC:25178]	4.47069
MLXIPL	MLX interacting protein like [Source:HGNC Symbol;Acc:HGNC:12744]	4.37991
PLPPR3	phospholipid phosphatase related 3 [Source:HGNC Symbol;Acc:HGNC:23497]	4.34898
EDNRB	endothelin receptor type B [Source:HGNC Symbol;Acc:HGNC:3180]	4.3149
TSPAN18	tetraspanin 18 [Source:HGNC Symbol;Acc:HGNC:20660]	4.25043
ENAH	ENAH actin regulator [Source:HGNC Symbol;Acc:HGNC:18271]	4.21641
AQP9	aquaporin 9 [Source:HGNC Symbol;Acc:HGNC:643]	4.16971
CLEC4F	C-type lectin domain family 4 member F [Source:HGNC Symbol;Acc:HGNC:25357]	4.03776
SYNGAP1	synaptic Ras GTPase activating protein 1 [Source:HGNC Symbol;Acc:HGNC:11497]	4.01424
SPRY1	sprouty RTK signaling antagonist 1 [Source:HGNC Symbol;Acc:HGNC:11269]	4.00431
CYP26B1	cytochrome P450 family 26 subfamily B member 1 [Source:HGNC Symbol;Acc:HGNC:20581]	3.98892
EMX2	empty spiracles homeobox 2 [Source:HGNC Symbol;Acc:HGNC:3341]	3.84846
SIRPD	signal regulatory protein delta [Source:HGNC Symbol;Acc:HGNC:16248]	3.84072
SCEL	sciellin [Source:HGNC Symbol;Acc:HGNC:10573]	3.80046
SNAI3	snail family transcriptional repressor 3 [Source:HGNC Symbol;Acc:HGNC:18411]	3.7386
F5	coagulation factor V [Source:HGNC Symbol;Acc:HGNC:3542]	3.71219
TGM1	transglutaminase 1 [Source:HGNC Symbol;Acc:HGNC:11777]	3.7084
GRIK4	glutamate ionotropic receptor kainate type subunit 4 [Source:HGNC Symbol;Acc:HGNC:4582]	3.69281
ELOVL7	ELOVL fatty acid elongase 7 [Source:HGNC Symbol;Acc:HGNC:26292]	3.65417
P2RX1	purinergic receptor P2X 1 [Source:HGNC Symbol;Acc:HGNC:8533]	3.63025
GDA	guanine deaminase [Source:HGNC Symbol;Acc:HGNC:4212]	3.5646
PRTN3	proteinase 3 [Source:HGNC Symbol;Acc:HGNC:9495]	3.52673
AKAP7	A-kinase anchoring protein 7 [Source:HGNC Symbol;Acc:HGNC:377]	3.48206
GFRA4	GDNF family receptor alpha 4 [Source:HGNC Symbol;Acc:HGNC:13821]	3.42985
SERPINB10	serpin family B member 10 [Source:HGNC Symbol;Acc:HGNC:8942]	3.3784
TMEM215	transmembrane protein 215 [Source:HGNC Symbol;Acc:HGNC:33816]	3.37537
PALM	paralemmin [Source:HGNC Symbol;Acc:HGNC:8594]	3.35789
ELFN2	extracellular leucine rich repeat and fibronectin type III domain containing 2 [Source:HGNC Symbol;Acc:HGNC:29396]	3.33333
TMEM52	transmembrane protein 52 [Source:HGNC Symbol;Acc:HGNC:27916]	3.2906
TMEM53	transmembrane protein 53 [Source:HGNC Symbol;Acc:HGNC:26186]	3.27896
RHOU	ras homolog family member U [Source:HGNC Symbol;Acc:HGNC:17794]	3.27839
ADAMTSL4	ADAMTS like 4 [Source:HGNC Symbol;Acc:HGNC:19706]	3.25256
CD209	CD209 molecule [Source:HGNC Symbol;Acc:HGNC:1641]	3.24638
TTC25	tetratricopeptide repeat domain 25 [Source:HGNC Symbol;Acc:HGNC:25280]	3.237
IGFBP6	insulin like growth factor binding protein 6 [Source:HGNC Symbol;Acc:HGNC:5475]	3.22736
CCR1	C-C motif chemokine receptor 1 [Source:HGNC Symbol;Acc:HGNC:1602]	3.21901
PKD1L2	polycystin 1 like 2 (gene/pseudogene) [Source:HGNC Symbol;Acc:HGNC:21715]	3.2161
ANOS1	anosmin 1 [Source:HGNC Symbol;Acc:HGNC:6211]	3.216
KCNAB3	potassium voltage-gated channel subfamily A regulatory beta subunit 3 [Source:HGNC Symbol;Acc:HGNC:6230]	3.20608
ARRDC4	arrestin domain containing 4 [Source:HGNC Symbol;Acc:HGNC:28087]	3.17739
CFH	complement factor H [Source:HGNC Symbol;Acc:HGNC:4883]	3.16914
NRG1	neuregulin 1 [Source:HGNC Symbol;Acc:HGNC:7997]	3.16342
PADI4	peptidyl arginine deiminase 4 [Source:HGNC Symbol;Acc:HGNC:18368]	3.15456
EPS8	epidermal growth factor receptor pathway substrate 8 [Source:HGNC Symbol;Acc:HGNC:3420]	3.14806
RCOR2	REST corepressor 2 [Source:HGNC Symbol;Acc:HGNC:27455]	3.1411
SCARF2	scavenger receptor class F member 2 [Source:HGNC Symbol;Acc:HGNC:19869]	3.10784
FAM20A	FAM20A golgi associated secretory pathway pseudokinase [Source:HGNC Symbol;Acc:HGNC:23015]	3.0848
LBP	lipopolysaccharide binding protein [Source:HGNC Symbol;Acc:HGNC:6517]	3.06924
G0S2	G0/G1 switch 2 [Source:HGNC Symbol;Acc:HGNC:30229]	3.06238
PPP1R3B	protein phosphatase 1 regulatory subunit 3B [Source:HGNC Symbol;Acc:HGNC:14942]	3.02368
PRAM1	PML-RARA regulated adaptor molecule 1 [Source:HGNC Symbol;Acc:HGNC:30091]	3.01763
SELL	selectin L [Source:HGNC Symbol;Acc:HGNC:10720]	3.01199
MDFI	MyoD family inhibitor [Source:HGNC Symbol;Acc:HGNC:6967]	2.97839
DIP2C	disco interacting protein 2 homolog C [Source:HGNC Symbol;Acc:HGNC:29150]	2.96617
RELT	RELT TNF receptor [Source:HGNC Symbol;Acc:HGNC:13764]	2.94792
IL4R	interleukin 4 receptor [Source:HGNC Symbol;Acc:HGNC:6015]	2.90908
SHCBP1L	SHC binding and spindle associated 1 like [Source:HGNC Symbol;Acc:HGNC:16788]	2.88981
CLMN	calmin [Source:HGNC Symbol;Acc:HGNC:19972]	2.88881
TREML2	triggering receptor expressed on myeloid cells like 2 [Source:HGNC Symbol;Acc:HGNC:21092]	2.888
RASGRP2	RAS guanyl releasing protein 2 [Source:HGNC Symbol;Acc:HGNC:9879]	2.88601
KLK1	kallikrein 1 [Source:HGNC Symbol;Acc:HGNC:6357]	2.88599
ZNF568	zinc finger protein 568 [Source:HGNC Symbol;Acc:HGNC:25392]	2.88588
RDH16	retinol dehydrogenase 16 [Source:HGNC Symbol;Acc:HGNC:29674]	2.88436
GRTP1	growth hormone regulated TBC protein 1 [Source:HGNC Symbol;Acc:HGNC:20310]	2.88284
C7orf50	chromosome 7 open reading frame 50 [Source:HGNC Symbol;Acc:HGNC:22421]	2.86137
BCL2A1	BCL2 related protein A1 [Source:HGNC Symbol;Acc:HGNC:991]	2.82375
PGF	placental growth factor [Source:HGNC Symbol;Acc:HGNC:8893]	2.81839
HIC1	HIC ZBTB transcriptional repressor 1 [Source:HGNC Symbol;Acc:HGNC:4909]	2.80364
MAGEE1	MAGE family member E1 [Source:HGNC Symbol;Acc:HGNC:24934]	2.79252
BMX	BMX non-receptor tyrosine kinase [Source:HGNC Symbol;Acc:HGNC:1079]	2.78907
FABP7	fatty acid binding protein 7 [Source:HGNC Symbol;Acc:HGNC:3562]	2.76905
DCAF1	DDB1 and CUL4 associated factor 1 [Source:HGNC Symbol;Acc:HGNC:30911]	2.75845
CALML4	calmodulin like 4 [Source:HGNC Symbol;Acc:HGNC:18445]	2.75579
CXCL14	C-X-C motif chemokine ligand 14 [Source:HGNC Symbol;Acc:HGNC:10640]	2.75102
VEGFA	vascular endothelial growth factor A [Source:HGNC Symbol;Acc:HGNC:12680]	2.74425
CYP2D6	cytochrome P450 family 2 subfamily D member 6 [Source:HGNC Symbol;Acc:HGNC:2625]	2.73763
FAM170B	family with sequence similarity 170 member B [Source:HGNC Symbol;Acc:HGNC:19736]	2.72547
SNX6	sorting nexin 6 [Source:HGNC Symbol;Acc:HGNC:14970]	2.72458
CCL23	C-C motif chemokine ligand 23 [Source:HGNC Symbol;Acc:HGNC:10622]	2.7208
PCNX2	pecanex 2 [Source:HGNC Symbol;Acc:HGNC:8736]	2.7149
PI16	peptidase inhibitor 16 [Source:HGNC Symbol;Acc:HGNC:21245]	2.71292
MAP3K15	mitogen-activated protein kinase kinase kinase 15 [Source:HGNC Symbol;Acc:HGNC:31689]	2.70732
PHYHD1	phytanoyl-CoA dioxygenase domain containing 1 [Source:HGNC Symbol;Acc:HGNC:23396]	2.68986
ARSG	arylsulfatase G [Source:HGNC Symbol;Acc:HGNC:24102]	2.67401
EPM2A	EPM2A glucan phosphatase, laforin [Source:HGNC Symbol;Acc:HGNC:3413]	2.64543
MUC2	mucin 2, oligomeric mucus/gel-forming [Source:HGNC Symbol;Acc:HGNC:7512]	2.62754
ITGAE	integrin subunit alpha E [Source:HGNC Symbol;Acc:HGNC:6147]	2.61938
SUSD4	sushi domain containing 4 [Source:HGNC Symbol;Acc:HGNC:25470]	2.61499
ALDH1L2	aldehyde dehydrogenase 1 family member L2 [Source:HGNC Symbol;Acc:HGNC:26777]	2.61275
SHISA4	shisa family member 4 [Source:HGNC Symbol;Acc:HGNC:27139]	2.58861
CCR2	C-C motif chemokine receptor 2 [Source:HGNC Symbol;Acc:HGNC:1603]	2.56995
GRHPR	glyoxylate and hydroxypyruvate reductase [Source:HGNC Symbol;Acc:HGNC:4570]	2.5691
SLC7A5	solute carrier family 7 member 5 [Source:HGNC Symbol;Acc:HGNC:11063]	2.56162
TRPM3	transient receptor potential cation channel subfamily M member 3 [Source:HGNC Symbol;Acc:HGNC:17992]	2.54535
FAM13A	family with sequence similarity 13 member A [Source:HGNC Symbol;Acc:HGNC:19367]	2.53956
CABLES1	Cdk5 and Abl enzyme substrate 1 [Source:HGNC Symbol;Acc:HGNC:25097]	2.53813
FAM217B	family with sequence similarity 217 member B [Source:HGNC Symbol;Acc:HGNC:16170]	2.5368
ACLY	ATP citrate lyase [Source:HGNC Symbol;Acc:HGNC:115]	2.52852
CGN	cingulin [Source:HGNC Symbol;Acc:HGNC:17429]	2.52242
MAP3K13	mitogen-activated protein kinase kinase kinase 13 [Source:HGNC Symbol;Acc:HGNC:6852]	2.49847
RGS11	regulator of G protein signaling 11 [Source:HGNC Symbol;Acc:HGNC:9993]	2.48492
TPPP3	tubulin polymerization promoting protein family member 3 [Source:HGNC Symbol;Acc:HGNC:24162]	2.48491
VDR	vitamin D receptor [Source:HGNC Symbol;Acc:HGNC:12679]	2.47652
HLA-DOB	major histocompatibility complex, class II, DO beta [Source:HGNC Symbol;Acc:HGNC:4937]	2.46988
RBPJ	recombination signal binding protein for immunoglobulin kappa J region [Source:HGNC Symbol;Acc:HGNC:5724]	2.45698
F13A1	coagulation factor XIII A chain [Source:HGNC Symbol;Acc:HGNC:3531]	2.44402
PF4	platelet factor 4 [Source:HGNC Symbol;Acc:HGNC:8861]	2.44144
IFITM1	interferon induced transmembrane protein 1 [Source:HGNC Symbol;Acc:HGNC:5412]	2.42782
ATP7B	ATPase copper transporting beta [Source:HGNC Symbol;Acc:HGNC:870]	2.42545
NGB	neuroglobin [Source:HGNC Symbol;Acc:HGNC:14077]	2.42545
FAHD2A	fumarylacetoacetate hydrolase domain containing 2A [Source:HGNC Symbol;Acc:HGNC:24252]	2.42135
GPR171	G protein-coupled receptor 171 [Source:HGNC Symbol;Acc:HGNC:30057]	2.41439
RAB37	RAB37, member RAS oncogene family [Source:HGNC Symbol;Acc:HGNC:30268]	2.41361
MARCHF9	membrane associated ring-CH-type finger 9 [Source:HGNC Symbol;Acc:HGNC:25139]	2.39898
GABBR1	gamma-aminobutyric acid type B receptor subunit 1 [Source:HGNC Symbol;Acc:HGNC:4070]	2.39594
ENTPD3	ectonucleoside triphosphate diphosphohydrolase 3 [Source:HGNC Symbol;Acc:HGNC:3365]	2.39378
CYSLTR1	cysteinyl leukotriene receptor 1 [Source:HGNC Symbol;Acc:HGNC:17451]	2.38184
HIVEP2	HIVEP zinc finger 2 [Source:HGNC Symbol;Acc:HGNC:4921]	2.37751
ARG1	arginase 1 [Source:HGNC Symbol;Acc:HGNC:663]	2.37184
SMIM38	small integral membrane protein 38 [Source:HGNC Symbol;Acc:HGNC:54074]	2.37066
PRUNE2	prune homolog 2 with BCH domain [Source:HGNC Symbol;Acc:HGNC:25209]	2.3618
CELA1	chymotrypsin like elastase 1 [Source:HGNC Symbol;Acc:HGNC:3308]	2.35307
MR1	major histocompatibility complex, class I-related [Source:HGNC Symbol;Acc:HGNC:4975]	2.33821
JMJD7-PLA2G4B	JMJD7-PLA2G4B readthrough [Source:HGNC Symbol;Acc:HGNC:34449]	2.33107
TSPAN32	tetraspanin 32 [Source:HGNC Symbol;Acc:HGNC:13410]	2.32619
PIM1	Pim-1 proto-oncogene, serine/threonine kinase [Source:HGNC Symbol;Acc:HGNC:8986]	2.32333
FAM102A	family with sequence similarity 102 member A [Source:HGNC Symbol;Acc:HGNC:31419]	2.31143
ISLR2	immunoglobulin superfamily containing leucine rich repeat 2 [Source:HGNC Symbol;Acc:HGNC:29286]	2.28572
TMEM154	transmembrane protein 154 [Source:HGNC Symbol;Acc:HGNC:26489]	2.28189
CEMIP2	cell migration inducing hyaluronidase 2 [Source:HGNC Symbol;Acc:HGNC:11869]	2.2702
TLR5	toll like receptor 5 [Source:HGNC Symbol;Acc:HGNC:11851]	2.26378
EFNA1	ephrin A1 [Source:HGNC Symbol;Acc:HGNC:3221]	2.26023
LRP12	LDL receptor related protein 12 [Source:HGNC Symbol;Acc:HGNC:31708]	2.25804
C3orf70	chromosome 3 open reading frame 70 [Source:HGNC Symbol;Acc:HGNC:33731]	2.25542
NT5E	5'-nucleotidase ecto [Source:HGNC Symbol;Acc:HGNC:8021]	2.25189
LPP	LIM domain containing preferred translocation partner in lipoma [Source:HGNC Symbol;Acc:HGNC:6679]	2.24594
GPR15	G protein-coupled receptor 15 [Source:HGNC Symbol;Acc:HGNC:4469]	2.24449
FUT8	fucosyltransferase 8 [Source:HGNC Symbol;Acc:HGNC:4019]	2.24099
MAPK13	mitogen-activated protein kinase 13 [Source:HGNC Symbol;Acc:HGNC:6875]	2.23026
EPAS1	endothelial PAS domain protein 1 [Source:HGNC Symbol;Acc:HGNC:3374]	2.22891
LTBP3	latent transforming growth factor beta binding protein 3 [Source:HGNC Symbol;Acc:HGNC:6716]	2.22314
NDRG2	NDRG family member 2 [Source:HGNC Symbol;Acc:HGNC:14460]	2.22227
STON2	stonin 2 [Source:HGNC Symbol;Acc:HGNC:30652]	2.20727
HABP2	hyaluronan binding protein 2 [Source:HGNC Symbol;Acc:HGNC:4798]	2.1978
CASTOR1	cytosolic arginine sensor for mTORC1 subunit 1 [Source:HGNC Symbol;Acc:HGNC:34423]	2.19563
PDGFC	platelet derived growth factor C [Source:HGNC Symbol;Acc:HGNC:8801]	2.19261
PDE2A	phosphodiesterase 2A [Source:HGNC Symbol;Acc:HGNC:8777]	2.1868
PKDCC	protein kinase domain containing, cytoplasmic [Source:HGNC Symbol;Acc:HGNC:25123]	2.17929
RETREG1	reticulophagy regulator 1 [Source:HGNC Symbol;Acc:HGNC:25964]	2.17855
SEMA4G	semaphorin 4G [Source:HGNC Symbol;Acc:HGNC:10735]	2.17419
SLC52A3	solute carrier family 52 member 3 [Source:HGNC Symbol;Acc:HGNC:16187]	2.16678
SERP1	stress associated endoplasmic reticulum protein 1 [Source:HGNC Symbol;Acc:HGNC:10759]	2.16507
TNR	tenascin R [Source:HGNC Symbol;Acc:HGNC:11953]	2.15982
TXNIP	thioredoxin interacting protein [Source:HGNC Symbol;Acc:HGNC:16952]	2.15879
ID3	inhibitor of DNA binding 3, HLH protein [Source:HGNC Symbol;Acc:HGNC:5362]	2.15722
HDAC9	histone deacetylase 9 [Source:HGNC Symbol;Acc:HGNC:14065]	2.15449
ARMCX2	armadillo repeat containing X-linked 2 [Source:HGNC Symbol;Acc:HGNC:16869]	2.14885
GAPT	GRB2 binding adaptor protein, transmembrane [Source:HGNC Symbol;Acc:HGNC:26588]	2.14756
ZXDB	zinc finger X-linked duplicated B [Source:HGNC Symbol;Acc:HGNC:13199]	2.14088
COL20A1	collagen type XX alpha 1 chain [Source:HGNC Symbol;Acc:HGNC:14670]	2.14048
KIF19	kinesin family member 19 [Source:HGNC Symbol;Acc:HGNC:26735]	2.14043
PGAP3	post-GPI attachment to proteins phospholipase 3 [Source:HGNC Symbol;Acc:HGNC:23719]	2.13763
MMP28	matrix metallopeptidase 28 [Source:HGNC Symbol;Acc:HGNC:14366]	2.12444
XBP1	X-box binding protein 1 [Source:HGNC Symbol;Acc:HGNC:12801]	2.11969
ARHGEF40	Rho guanine nucleotide exchange factor 40 [Source:HGNC Symbol;Acc:HGNC:25516]	2.1156
STK26	serine/threonine kinase 26 [Source:HGNC Symbol;Acc:HGNC:18174]	2.11367
GPR35	G protein-coupled receptor 35 [Source:HGNC Symbol;Acc:HGNC:4492]	2.11145
CASP12	caspase 12 (gene/pseudogene) [Source:HGNC Symbol;Acc:HGNC:19004]	2.10608
CD300LF	CD300 molecule like family member f [Source:HGNC Symbol;Acc:HGNC:29883]	2.0971
AARSD1	alanyl-tRNA synthetase domain containing 1 [Source:HGNC Symbol;Acc:HGNC:28417]	2.09378
ARRDC3	arrestin domain containing 3 [Source:HGNC Symbol;Acc:HGNC:29263]	2.09184
MVB12B	multivesicular body subunit 12B [Source:HGNC Symbol;Acc:HGNC:23368]	2.0846
B3GALT2	beta-1,3-galactosyltransferase 2 [Source:HGNC Symbol;Acc:HGNC:917]	2.0824
ADGRG1	adhesion G protein-coupled receptor G1 [Source:HGNC Symbol;Acc:HGNC:4512]	2.0818
NIPA1	NIPA magnesium transporter 1 [Source:HGNC Symbol;Acc:HGNC:17043]	2.07068
ZNF703	zinc finger protein 703 [Source:HGNC Symbol;Acc:HGNC:25883]	2.06733
GSTA1	glutathione S-transferase alpha 1 [Source:HGNC Symbol;Acc:HGNC:4626]	2.066
SOAT2	sterol O-acyltransferase 2 [Source:HGNC Symbol;Acc:HGNC:11178]	2.06583
NXPE1	neurexophilin and PC-esterase domain family member 1 [Source:HGNC Symbol;Acc:HGNC:28527]	2.05785
LFNG	LFNG O-fucosylpeptide 3-beta-N-acetylglucosaminyltransferase [Source:HGNC Symbol;Acc:HGNC:6560]	2.05625
KISS1R	KISS1 receptor [Source:HGNC Symbol;Acc:HGNC:4510]	2.05046
PGM2L1	phosphoglucomutase 2 like 1 [Source:HGNC Symbol;Acc:HGNC:20898]	2.0501
CDC42BPG	CDC42 binding protein kinase gamma [Source:HGNC Symbol;Acc:HGNC:29829]	2.04832
MAK	male germ cell associated kinase [Source:HGNC Symbol;Acc:HGNC:6816]	2.04368
HECTD4	HECT domain E3 ubiquitin protein ligase 4 [Source:HGNC Symbol;Acc:HGNC:26611]	2.04257
EGLN1	egl-9 family hypoxia inducible factor 1 [Source:HGNC Symbol;Acc:HGNC:1232]	2.04005
PPBP	pro-platelet basic protein [Source:HGNC Symbol;Acc:HGNC:9240]	2.03631
LRRC27	leucine rich repeat containing 27 [Source:HGNC Symbol;Acc:HGNC:29346]	2.03302
APOC2	apolipoprotein C2 [Source:HGNC Symbol;Acc:HGNC:609]	2.03084
ADGRA2	adhesion G protein-coupled receptor A2 [Source:HGNC Symbol;Acc:HGNC:17849]	2.02979
BANK1	B cell scaffold protein with ankyrin repeats 1 [Source:HGNC Symbol;Acc:HGNC:18233]	2.0289
RNF157	ring finger protein 157 [Source:HGNC Symbol;Acc:HGNC:29402]	2.02799
ELOVL6	ELOVL fatty acid elongase 6 [Source:HGNC Symbol;Acc:HGNC:15829]	2.02652
KDM6B	lysine demethylase 6B [Source:HGNC Symbol;Acc:HGNC:29012]	2.01555
LAPTM4B	lysosomal protein transmembrane 4 beta [Source:HGNC Symbol;Acc:HGNC:13646]	2.01466
PPP1R13L	protein phosphatase 1 regulatory subunit 13 like [Source:HGNC Symbol;Acc:HGNC:18838]	2.01386
CARD11	caspase recruitment domain family member 11 [Source:HGNC Symbol;Acc:HGNC:16393]	2.01209
PRKCG	protein kinase C gamma [Source:HGNC Symbol;Acc:HGNC:9402]	2.00923
EPHB2	EPH receptor B2 [Source:HGNC Symbol;Acc:HGNC:3393]	2.00824
MT-TS2	mitochondrially encoded tRNA-Ser (AGU/C) 2 [Source:HGNC Symbol;Acc:HGNC:7498]	2.00721
ALDH5A1	aldehyde dehydrogenase 5 family member A1 [Source:HGNC Symbol;Acc:HGNC:408]	2.00646
TRAPPC6A	trafficking protein particle complex 6A [Source:HGNC Symbol;Acc:HGNC:23069]	2.00466
AMIGO2	adhesion molecule with Ig like domain 2 [Source:HGNC Symbol;Acc:HGNC:24073]	2.00381
RAB3D	RAB3D, member RAS oncogene family [Source:HGNC Symbol;Acc:HGNC:9779]	2.00167
MYL10	myosin light chain 10 [Source:HGNC Symbol;Acc:HGNC:29825]	1.99728
LRP6	LDL receptor related protein 6 [Source:HGNC Symbol;Acc:HGNC:6698]	1.99705
IL4	interleukin 4 [Source:HGNC Symbol;Acc:HGNC:6014]	1.99444
ITIH5	inter-alpha-trypsin inhibitor heavy chain 5 [Source:HGNC Symbol;Acc:HGNC:21449]	1.98824
LRG1	leucine rich alpha-2-glycoprotein 1 [Source:HGNC Symbol;Acc:HGNC:29480]	1.98796
SCAMP1	secretory carrier membrane protein 1 [Source:HGNC Symbol;Acc:HGNC:10563]	1.98752
DDAH2	dimethylarginine dimethylaminohydrolase 2 [Source:HGNC Symbol;Acc:HGNC:2716]	1.98748
GPR176	G protein-coupled receptor 176 [Source:HGNC Symbol;Acc:HGNC:32370]	1.97393
EHHADH	enoyl-CoA hydratase and 3-hydroxyacyl CoA dehydrogenase [Source:HGNC Symbol;Acc:HGNC:3247]	1.96246
ABHD17B	abhydrolase domain containing 17B, depalmitoylase [Source:HGNC Symbol;Acc:HGNC:24278]	1.95845
KSR1	kinase suppressor of ras 1 [Source:HGNC Symbol;Acc:HGNC:6465]	1.95681
SPTBN5	spectrin beta, non-erythrocytic 5 [Source:HGNC Symbol;Acc:HGNC:15680]	1.95508
MT-ND3	mitochondrially encoded NADH:ubiquinone oxidoreductase core subunit 3 [Source:HGNC Symbol;Acc:HGNC:7458]	1.95273
TMEM40	transmembrane protein 40 [Source:HGNC Symbol;Acc:HGNC:25620]	1.94799
KLF10	Kruppel like factor 10 [Source:HGNC Symbol;Acc:HGNC:11810]	1.9438
FAM117A	family with sequence similarity 117 member A [Source:HGNC Symbol;Acc:HGNC:24179]	1.94263
C4B	complement C4B (Chido blood group) [Source:HGNC Symbol;Acc:HGNC:1324]	1.94248
SEMA4C	semaphorin 4C [Source:HGNC Symbol;Acc:HGNC:10731]	1.93664
TMEM9	transmembrane protein 9 [Source:HGNC Symbol;Acc:HGNC:18823]	1.9323
NFE2	nuclear factor, erythroid 2 [Source:HGNC Symbol;Acc:HGNC:7780]	1.92717
NYAP1	neuronal tyrosine phosphorylated phosphoinositide-3-kinase adaptor 1 [Source:HGNC Symbol;Acc:HGNC:22009]	1.9267
SLC25A15	solute carrier family 25 member 15 [Source:HGNC Symbol;Acc:HGNC:10985]	1.92623
KHK	ketohexokinase [Source:HGNC Symbol;Acc:HGNC:6315]	1.92144
SATB1	SATB homeobox 1 [Source:HGNC Symbol;Acc:HGNC:10541]	1.90937
LSR	lipolysis stimulated lipoprotein receptor [Source:HGNC Symbol;Acc:HGNC:29572]	1.90755
RECK	reversion inducing cysteine rich protein with kazal motifs [Source:HGNC Symbol;Acc:HGNC:11345]	1.90742
GSDMC	gasdermin C [Source:HGNC Symbol;Acc:HGNC:7151]	1.90273
KDM5B	lysine demethylase 5B [Source:HGNC Symbol;Acc:HGNC:18039]	1.8968
UGCG	UDP-glucose ceramide glucosyltransferase [Source:HGNC Symbol;Acc:HGNC:12524]	1.89522
ABHD18	abhydrolase domain containing 18 [Source:HGNC Symbol;Acc:HGNC:26111]	1.89075
PYCR1	pyrroline-5-carboxylate reductase 1 [Source:HGNC Symbol;Acc:HGNC:9721]	1.88976
STAT4	signal transducer and activator of transcription 4 [Source:HGNC Symbol;Acc:HGNC:11365]	1.88863
ALDOC	aldolase, fructose-bisphosphate C [Source:HGNC Symbol;Acc:HGNC:418]	1.88501
SOCS2	suppressor of cytokine signaling 2 [Source:HGNC Symbol;Acc:HGNC:19382]	1.88433
LZTS2	leucine zipper tumor suppressor 2 [Source:HGNC Symbol;Acc:HGNC:29381]	1.88352
STARD10	StAR related lipid transfer domain containing 10 [Source:HGNC Symbol;Acc:HGNC:10666]	1.88218
KAZALD1	Kazal type serine peptidase inhibitor domain 1 [Source:HGNC Symbol;Acc:HGNC:25460]	1.87506
SVIL	supervillin [Source:HGNC Symbol;Acc:HGNC:11480]	1.87477
TNNT3	troponin T3, fast skeletal type [Source:HGNC Symbol;Acc:HGNC:11950]	1.87418
ZNF778	zinc finger protein 778 [Source:HGNC Symbol;Acc:HGNC:26479]	1.87353
P2RX3	purinergic receptor P2X 3 [Source:HGNC Symbol;Acc:HGNC:8534]	1.86265
GSTM3	glutathione S-transferase mu 3 [Source:HGNC Symbol;Acc:HGNC:4635]	1.85638
CRYZ	crystallin zeta [Source:HGNC Symbol;Acc:HGNC:2419]	1.85604
PPP1R3D	protein phosphatase 1 regulatory subunit 3D [Source:HGNC Symbol;Acc:HGNC:9294]	1.85394
ADSS1	adenylosuccinate synthase 1 [Source:HGNC Symbol;Acc:HGNC:20093]	1.85111
C16orf54	chromosome 16 open reading frame 54 [Source:HGNC Symbol;Acc:HGNC:26649]	1.84478
CHST15	carbohydrate sulfotransferase 15 [Source:HGNC Symbol;Acc:HGNC:18137]	1.84391
AATK	apoptosis associated tyrosine kinase [Source:HGNC Symbol;Acc:HGNC:21]	1.8437
THUMPD3-AS1	THUMPD3 antisense RNA 1 [Source:HGNC Symbol;Acc:HGNC:44478]	1.84344
STC2	stanniocalcin 2 [Source:HGNC Symbol;Acc:HGNC:11374]	1.83777
GSTM4	glutathione S-transferase mu 4 [Source:HGNC Symbol;Acc:HGNC:4636]	1.83608
PYGL	glycogen phosphorylase L [Source:HGNC Symbol;Acc:HGNC:9725]	1.83544
IMPDH1	inosine monophosphate dehydrogenase 1 [Source:HGNC Symbol;Acc:HGNC:6052]	1.83417
ZNF354C	zinc finger protein 354C [Source:HGNC Symbol;Acc:HGNC:16736]	1.83156
TYRO3	TYRO3 protein tyrosine kinase [Source:HGNC Symbol;Acc:HGNC:12446]	1.82593
MYO7A	myosin VIIA [Source:HGNC Symbol;Acc:HGNC:7606]	1.82513
IPP	intracisternal A particle-promoted polypeptide [Source:HGNC Symbol;Acc:HGNC:6108]	1.82305
SHPK	sedoheptulokinase [Source:HGNC Symbol;Acc:HGNC:1492]	1.82277
SLC30A7	solute carrier family 30 member 7 [Source:HGNC Symbol;Acc:HGNC:19306]	1.8211
IGFALS	insulin like growth factor binding protein acid labile subunit [Source:HGNC Symbol;Acc:HGNC:5468]	1.82055
JDP2	Jun dimerization protein 2 [Source:HGNC Symbol;Acc:HGNC:17546]	1.82
PRXL2B	peroxiredoxin like 2B [Source:HGNC Symbol;Acc:HGNC:28390]	1.8194
EMILIN2	elastin microfibril interfacer 2 [Source:HGNC Symbol;Acc:HGNC:19881]	1.81515
SPEF1	sperm flagellar 1 [Source:HGNC Symbol;Acc:HGNC:15874]	1.81505
EID1	EP300 interacting inhibitor of differentiation 1 [Source:HGNC Symbol;Acc:HGNC:1191]	1.80572
VWA7	von Willebrand factor A domain containing 7 [Source:HGNC Symbol;Acc:HGNC:13939]	1.80506
ZNF487	zinc finger protein 487 [Source:HGNC Symbol;Acc:HGNC:23488]	1.79835
SLC25A23	solute carrier family 25 member 23 [Source:HGNC Symbol;Acc:HGNC:19375]	1.7983
SEC22A	SEC22 homolog A, vesicle trafficking protein [Source:HGNC Symbol;Acc:HGNC:20260]	1.79528
DTX3	deltex E3 ubiquitin ligase 3 [Source:HGNC Symbol;Acc:HGNC:24457]	1.7937
PYCARD	PYD and CARD domain containing [Source:HGNC Symbol;Acc:HGNC:16608]	1.79004
FCRLB	Fc receptor like B [Source:HGNC Symbol;Acc:HGNC:26431]	1.7876
TMEM141	transmembrane protein 141 [Source:HGNC Symbol;Acc:HGNC:28211]	1.78734
ACSF2	acyl-CoA synthetase family member 2 [Source:HGNC Symbol;Acc:HGNC:26101]	1.78222
PAPSS2	3'-phosphoadenosine 5'-phosphosulfate synthase 2 [Source:HGNC Symbol;Acc:HGNC:8604]	1.78029
ITGA1	integrin subunit alpha 1 [Source:HGNC Symbol;Acc:HGNC:6134]	1.77989
MAPK7	mitogen-activated protein kinase 7 [Source:HGNC Symbol;Acc:HGNC:6880]	1.77802
JAML	junction adhesion molecule like [Source:HGNC Symbol;Acc:HGNC:19084]	1.77693
FCGR2B	Fc fragment of IgG receptor IIb [Source:HGNC Symbol;Acc:HGNC:3618]	1.77145
ELP1	elongator complex protein 1 [Source:HGNC Symbol;Acc:HGNC:5959]	1.7687
AHR	aryl hydrocarbon receptor [Source:HGNC Symbol;Acc:HGNC:348]	1.76797
NRAP	nebulin related anchoring protein [Source:HGNC Symbol;Acc:HGNC:7988]	1.76629
FCGR3A	Fc fragment of IgG receptor IIIa [Source:HGNC Symbol;Acc:HGNC:3619]	1.7653
OTUB2	OTU deubiquitinase, ubiquitin aldehyde binding 2 [Source:HGNC Symbol;Acc:HGNC:20351]	1.76255
RPS13	ribosomal protein S13 [Source:HGNC Symbol;Acc:HGNC:10386]	1.76175
SNHG11	small nucleolar RNA host gene 11 [Source:HGNC Symbol;Acc:HGNC:25046]	1.76121
PLAC8	placenta associated 8 [Source:HGNC Symbol;Acc:HGNC:19254]	1.75966
BTG1	BTG anti-proliferation factor 1 [Source:HGNC Symbol;Acc:HGNC:1130]	1.75507
IL13RA1	interleukin 13 receptor subunit alpha 1 [Source:HGNC Symbol;Acc:HGNC:5974]	1.75161
DCUN1D4	defective in cullin neddylation 1 domain containing 4 [Source:HGNC Symbol;Acc:HGNC:28998]	1.75099
DYNC2H1	dynein cytoplasmic 2 heavy chain 1 [Source:HGNC Symbol;Acc:HGNC:2962]	1.74397
ITPR3	inositol 1,4,5-trisphosphate receptor type 3 [Source:HGNC Symbol;Acc:HGNC:6182]	1.7409
WIPI1	WD repeat domain, phosphoinositide interacting 1 [Source:HGNC Symbol;Acc:HGNC:25471]	1.73954
MAOA	monoamine oxidase A [Source:HGNC Symbol;Acc:HGNC:6833]	1.7328
CERCAM	cerebral endothelial cell adhesion molecule [Source:HGNC Symbol;Acc:HGNC:23723]	1.73276
KIAA1671	KIAA1671 [Source:HGNC Symbol;Acc:HGNC:29345]	1.73196
TMEM37	transmembrane protein 37 [Source:HGNC Symbol;Acc:HGNC:18216]	1.73002
OMG	oligodendrocyte myelin glycoprotein [Source:HGNC Symbol;Acc:HGNC:8135]	1.72873
MPST	mercaptopyruvate sulfurtransferase [Source:HGNC Symbol;Acc:HGNC:7223]	1.72702
CD53	CD53 molecule [Source:HGNC Symbol;Acc:HGNC:1686]	1.72686
CCR5	C-C motif chemokine receptor 5 [Source:HGNC Symbol;Acc:HGNC:1606]	1.72446
MOSPD1	motile sperm domain containing 1 [Source:HGNC Symbol;Acc:HGNC:25235]	1.72324
TPMT	thiopurine S-methyltransferase [Source:HGNC Symbol;Acc:HGNC:12014]	1.72123
GRK6	G protein-coupled receptor kinase 6 [Source:HGNC Symbol;Acc:HGNC:4545]	1.72032
FCSK	fucose kinase [Source:HGNC Symbol;Acc:HGNC:29500]	1.71939
NICN1	nicolin 1 [Source:HGNC Symbol;Acc:HGNC:18317]	1.7178
P4HA2	prolyl 4-hydroxylase subunit alpha 2 [Source:HGNC Symbol;Acc:HGNC:8547]	1.71755
ATG4C	autophagy related 4C cysteine peptidase [Source:HGNC Symbol;Acc:HGNC:16040]	1.71728
GALNT3	polypeptide N-acetylgalactosaminyltransferase 3 [Source:HGNC Symbol;Acc:HGNC:4125]	1.71477
SLC25A41	solute carrier family 25 member 41 [Source:HGNC Symbol;Acc:HGNC:28533]	1.71446
C1orf74	chromosome 1 open reading frame 74 [Source:HGNC Symbol;Acc:HGNC:26319]	1.71379
DENND2D	DENN domain containing 2D [Source:HGNC Symbol;Acc:HGNC:26192]	1.71135
EXPH5	exophilin 5 [Source:HGNC Symbol;Acc:HGNC:30578]	1.70812
SOX4	SRY-box transcription factor 4 [Source:HGNC Symbol;Acc:HGNC:11200]	1.7069
NUDT16	nudix hydrolase 16 [Source:HGNC Symbol;Acc:HGNC:26442]	1.70509
PRR33	proline rich 33 [Source:HGNC Symbol;Acc:HGNC:35118]	1.70285
SCRN2	secernin 2 [Source:HGNC Symbol;Acc:HGNC:30381]	1.70155
GPR146	G protein-coupled receptor 146 [Source:HGNC Symbol;Acc:HGNC:21718]	1.70022
MAP2K6	mitogen-activated protein kinase kinase 6 [Source:HGNC Symbol;Acc:HGNC:6846]	1.69808
TMEM82	transmembrane protein 82 [Source:HGNC Symbol;Acc:HGNC:32350]	1.6975
ARHGEF25	Rho guanine nucleotide exchange factor 25 [Source:HGNC Symbol;Acc:HGNC:30275]	1.6919
MTHFD2L	methylenetetrahydrofolate dehydrogenase (NADP+ dependent) 2 like [Source:HGNC Symbol;Acc:HGNC:31865]	1.69175
GPX3	glutathione peroxidase 3 [Source:HGNC Symbol;Acc:HGNC:4555]	1.68507
CDSN	corneodesmosin [Source:HGNC Symbol;Acc:HGNC:1802]	1.68289
SPINT1	serine peptidase inhibitor, Kunitz type 1 [Source:HGNC Symbol;Acc:HGNC:11246]	1.6825
GEMIN2	gem nuclear organelle associated protein 2 [Source:HGNC Symbol;Acc:HGNC:10884]	1.68219
CYP11A1	cytochrome P450 family 11 subfamily A member 1 [Source:HGNC Symbol;Acc:HGNC:2590]	1.6814
CD59	CD59 molecule (CD59 blood group) [Source:HGNC Symbol;Acc:HGNC:1689]	1.67865
SLC16A6	solute carrier family 16 member 6 [Source:HGNC Symbol;Acc:HGNC:10927]	1.6773
PREX2	phosphatidylinositol-3,4,5-trisphosphate dependent Rac exchange factor 2 [Source:HGNC Symbol;Acc:HGNC:22950]	1.67446
MLH3	mutL homolog 3 [Source:HGNC Symbol;Acc:HGNC:7128]	1.6698
RASGEF1C	RasGEF domain family member 1C [Source:HGNC Symbol;Acc:HGNC:27400]	1.66667
RHOH	ras homolog family member H [Source:HGNC Symbol;Acc:HGNC:686]	1.66364
ELL	elongation factor for RNA polymerase II [Source:HGNC Symbol;Acc:HGNC:23114]	1.66292
YAF2	YY1 associated factor 2 [Source:HGNC Symbol;Acc:HGNC:17363]	1.66005
FAM43A	family with sequence similarity 43 member A [Source:HGNC Symbol;Acc:HGNC:26888]	1.6595
DAB2	DAB adaptor protein 2 [Source:HGNC Symbol;Acc:HGNC:2662]	1.65351
MEDAG	mesenteric estrogen dependent adipogenesis [Source:HGNC Symbol;Acc:HGNC:25926]	1.65316
SAT2	spermidine/spermine N1-acetyltransferase family member 2 [Source:HGNC Symbol;Acc:HGNC:23160]	1.65296
SERPINA11	serpin family A member 11 [Source:HGNC Symbol;Acc:HGNC:19193]	1.64933
GNG7	G protein subunit gamma 7 [Source:HGNC Symbol;Acc:HGNC:4410]	1.64751
CCN1	cellular communication network factor 1 [Source:HGNC Symbol;Acc:HGNC:2654]	1.64647
BNIP3	BCL2 interacting protein 3 [Source:HGNC Symbol;Acc:HGNC:1084]	1.64603
ZNF101	zinc finger protein 101 [Source:HGNC Symbol;Acc:HGNC:12881]	1.64432
CAND2	cullin associated and neddylation dissociated 2 (putative) [Source:HGNC Symbol;Acc:HGNC:30689]	1.64333
ABHD14A	abhydrolase domain containing 14A [Source:HGNC Symbol;Acc:HGNC:24538]	1.64274
CCDC17	coiled-coil domain containing 17 [Source:HGNC Symbol;Acc:HGNC:26574]	1.64075
HK2	hexokinase 2 [Source:HGNC Symbol;Acc:HGNC:4923]	1.63708
NRIP1	nuclear receptor interacting protein 1 [Source:HGNC Symbol;Acc:HGNC:8001]	1.63701
SDHAF4	succinate dehydrogenase complex assembly factor 4 [Source:HGNC Symbol;Acc:HGNC:20957]	1.63013
CCN2	cellular communication network factor 2 [Source:HGNC Symbol;Acc:HGNC:2500]	1.62723
EMC9	ER membrane protein complex subunit 9 [Source:HGNC Symbol;Acc:HGNC:20273]	1.62313
TMC8	transmembrane channel like 8 [Source:HGNC Symbol;Acc:HGNC:20474]	1.62223
ATP2A3	ATPase sarcoplasmic/endoplasmic reticulum Ca2+ transporting 3 [Source:HGNC Symbol;Acc:HGNC:813]	1.62143
LONRF1	LON peptidase N-terminal domain and ring finger 1 [Source:HGNC Symbol;Acc:HGNC:26302]	1.62117
NEIL2	nei like DNA glycosylase 2 [Source:HGNC Symbol;Acc:HGNC:18956]	1.61525
AFAP1L1	actin filament associated protein 1 like 1 [Source:HGNC Symbol;Acc:HGNC:26714]	1.61349
CNN1	calponin 1 [Source:HGNC Symbol;Acc:HGNC:2155]	1.61333
TMEM241	transmembrane protein 241 [Source:HGNC Symbol;Acc:HGNC:31723]	1.61308
GPR180	G protein-coupled receptor 180 [Source:HGNC Symbol;Acc:HGNC:28899]	1.61074
SLC7A4	solute carrier family 7 member 4 [Source:HGNC Symbol;Acc:HGNC:11062]	1.60994
RARA	retinoic acid receptor alpha [Source:HGNC Symbol;Acc:HGNC:9864]	1.60853
NDST1	N-deacetylase and N-sulfotransferase 1 [Source:HGNC Symbol;Acc:HGNC:7680]	1.60782
PTGS1	prostaglandin-endoperoxide synthase 1 [Source:HGNC Symbol;Acc:HGNC:9604]	1.60725
FAM78A	family with sequence similarity 78 member A [Source:HGNC Symbol;Acc:HGNC:25465]	1.60667
MISP3	MISP family member 3 [Source:HGNC Symbol;Acc:HGNC:26963]	1.60304
KLHL7	kelch like family member 7 [Source:HGNC Symbol;Acc:HGNC:15646]	1.60264
RAB24	RAB24, member RAS oncogene family [Source:HGNC Symbol;Acc:HGNC:9765]	1.59982
BMP2	bone morphogenetic protein 2 [Source:HGNC Symbol;Acc:HGNC:1069]	1.59774
TMEM273	transmembrane protein 273 [Source:HGNC Symbol;Acc:HGNC:27274]	1.59555
KDM7A	lysine demethylase 7A [Source:HGNC Symbol;Acc:HGNC:22224]	1.59336
SYT8	synaptotagmin 8 [Source:HGNC Symbol;Acc:HGNC:19264]	1.59278
MPP7	membrane palmitoylated protein 7 [Source:HGNC Symbol;Acc:HGNC:26542]	1.59158
EPHA2	EPH receptor A2 [Source:HGNC Symbol;Acc:HGNC:3386]	1.59032
APOC4	apolipoprotein C4 [Source:HGNC Symbol;Acc:HGNC:611]	1.58981
ELANE	elastase, neutrophil expressed [Source:HGNC Symbol;Acc:HGNC:3309]	1.58951
TFEC	transcription factor EC [Source:HGNC Symbol;Acc:HGNC:11754]	1.58903
ALDH6A1	aldehyde dehydrogenase 6 family member A1 [Source:HGNC Symbol;Acc:HGNC:7179]	1.58758
SMO	smoothened, frizzled class receptor [Source:HGNC Symbol;Acc:HGNC:11119]	1.58435
MMP8	matrix metallopeptidase 8 [Source:HGNC Symbol;Acc:HGNC:7175]	1.58339
TGM2	transglutaminase 2 [Source:HGNC Symbol;Acc:HGNC:11778]	1.58122
JMJD7	jumonji domain containing 7 [Source:HGNC Symbol;Acc:HGNC:34397]	1.57948
MARK1	microtubule affinity regulating kinase 1 [Source:HGNC Symbol;Acc:HGNC:6896]	1.57639
SLC2A3	solute carrier family 2 member 3 [Source:HGNC Symbol;Acc:HGNC:11007]	1.5752
GPAT3	glycerol-3-phosphate acyltransferase 3 [Source:HGNC Symbol;Acc:HGNC:28157]	1.57408
STX3	syntaxin 3 [Source:HGNC Symbol;Acc:HGNC:11438]	1.57168
MVD	mevalonate diphosphate decarboxylase [Source:HGNC Symbol;Acc:HGNC:7529]	1.57142
XPR1	xenotropic and polytropic retrovirus receptor 1 [Source:HGNC Symbol;Acc:HGNC:12827]	1.57053
CATSPERD	cation channel sperm associated auxiliary subunit delta [Source:HGNC Symbol;Acc:HGNC:28598]	1.5698
SPAG8	sperm associated antigen 8 [Source:HGNC Symbol;Acc:HGNC:14105]	1.56934
SCN2B	sodium voltage-gated channel beta subunit 2 [Source:HGNC Symbol;Acc:HGNC:10589]	1.56908
TM7SF2	transmembrane 7 superfamily member 2 [Source:HGNC Symbol;Acc:HGNC:11863]	1.56693
CAMTA1	calmodulin binding transcription activator 1 [Source:HGNC Symbol;Acc:HGNC:18806]	1.56684
MGARP	mitochondria localized glutamic acid rich protein [Source:HGNC Symbol;Acc:HGNC:29969]	1.56586
HIVEP3	HIVEP zinc finger 3 [Source:HGNC Symbol;Acc:HGNC:13561]	1.56461
NARF	nuclear prelamin A recognition factor [Source:HGNC Symbol;Acc:HGNC:29916]	1.5608
CFL2	cofilin 2 [Source:HGNC Symbol;Acc:HGNC:1875]	1.55934
NAAA	N-acylethanolamine acid amidase [Source:HGNC Symbol;Acc:HGNC:736]	1.55905
RPS7	ribosomal protein S7 [Source:HGNC Symbol;Acc:HGNC:10440]	1.55606
BBS1	Bardet-Biedl syndrome 1 [Source:HGNC Symbol;Acc:HGNC:966]	1.55309
C8G	complement C8 gamma chain [Source:HGNC Symbol;Acc:HGNC:1354]	1.55302
DR1	down-regulator of transcription 1 [Source:HGNC Symbol;Acc:HGNC:3017]	1.55135
AJUBA	ajuba LIM protein [Source:HGNC Symbol;Acc:HGNC:20250]	1.54993
PKIB	cAMP-dependent protein kinase inhibitor beta [Source:HGNC Symbol;Acc:HGNC:9018]	1.54695
KYAT1	kynurenine aminotransferase 1 [Source:HGNC Symbol;Acc:HGNC:1564]	1.54635
CBY3	chibby family member 3 [Source:HGNC Symbol;Acc:HGNC:33278]	1.54539
METTL26	methyltransferase like 26 [Source:HGNC Symbol;Acc:HGNC:14141]	1.54494
FBXL5	F-box and leucine rich repeat protein 5 [Source:HGNC Symbol;Acc:HGNC:13602]	1.54313
TMEM268	transmembrane protein 268 [Source:HGNC Symbol;Acc:HGNC:24513]	1.54136
PTGER2	prostaglandin E receptor 2 [Source:HGNC Symbol;Acc:HGNC:9594]	1.54045
LGALSL	galectin like [Source:HGNC Symbol;Acc:HGNC:25012]	1.54032
TRIB3	tribbles pseudokinase 3 [Source:HGNC Symbol;Acc:HGNC:16228]	1.53986
FAM169B	family with sequence similarity 169 member B [Source:HGNC Symbol;Acc:HGNC:26835]	1.53918
NME4	NME/NM23 nucleoside diphosphate kinase 4 [Source:HGNC Symbol;Acc:HGNC:7852]	1.5365
PLEKHH2	pleckstrin homology, MyTH4 and FERM domain containing H2 [Source:HGNC Symbol;Acc:HGNC:30506]	1.53156
TENM4	teneurin transmembrane protein 4 [Source:HGNC Symbol;Acc:HGNC:29945]	1.53069
DGKA	diacylglycerol kinase alpha [Source:HGNC Symbol;Acc:HGNC:2849]	1.53014
FYB2	FYN binding protein 2 [Source:HGNC Symbol;Acc:HGNC:27295]	1.52737
MTFP1	mitochondrial fission process 1 [Source:HGNC Symbol;Acc:HGNC:26945]	1.52729
FAM199X	family with sequence similarity 199, X-linked [Source:HGNC Symbol;Acc:HGNC:25195]	1.52555
AMOT	angiomotin [Source:HGNC Symbol;Acc:HGNC:17810]	1.5253
ADD3	adducin 3 [Source:HGNC Symbol;Acc:HGNC:245]	1.52419
NAT8	N-acetyltransferase 8 (putative) [Source:HGNC Symbol;Acc:HGNC:18069]	1.52324
ZNF292	zinc finger protein 292 [Source:HGNC Symbol;Acc:HGNC:18410]	1.5221
SVIP	small VCP interacting protein [Source:HGNC Symbol;Acc:HGNC:25238]	1.52205
TTLL3	tubulin tyrosine ligase like 3 [Source:HGNC Symbol;Acc:HGNC:24483]	1.52102
KBTBD3	kelch repeat and BTB domain containing 3 [Source:HGNC Symbol;Acc:HGNC:22934]	1.51958
PROX2	prospero homeobox 2 [Source:HGNC Symbol;Acc:HGNC:26715]	1.5182
SPP1	secreted phosphoprotein 1 [Source:HGNC Symbol;Acc:HGNC:11255]	1.51746
ADAM10	ADAM metallopeptidase domain 10 [Source:HGNC Symbol;Acc:HGNC:188]	1.51735
GLIS2	GLIS family zinc finger 2 [Source:HGNC Symbol;Acc:HGNC:29450]	1.51592
DACT3	dishevelled binding antagonist of beta catenin 3 [Source:HGNC Symbol;Acc:HGNC:30745]	1.51512
EFCAB12	EF-hand calcium binding domain 12 [Source:HGNC Symbol;Acc:HGNC:28061]	1.51469
PPDPF	pancreatic progenitor cell differentiation and proliferation factor [Source:HGNC Symbol;Acc:HGNC:16142]	1.5146
SLC49A4	solute carrier family 49 member 4 [Source:HGNC Symbol;Acc:HGNC:16628]	1.51382
TK2	thymidine kinase 2 [Source:HGNC Symbol;Acc:HGNC:11831]	1.50541
CDKL5	cyclin dependent kinase like 5 [Source:HGNC Symbol;Acc:HGNC:11411]	1.5038
DGAT1	diacylglycerol O-acyltransferase 1 [Source:HGNC Symbol;Acc:HGNC:2843]	1.50179
HSPBAP1	HSPB1 associated protein 1 [Source:HGNC Symbol;Acc:HGNC:16389]	1.49866
IFI27L2	interferon alpha inducible protein 27 like 2 [Source:HGNC Symbol;Acc:HGNC:19753]	1.49421
ANKRD46	ankyrin repeat domain 46 [Source:HGNC Symbol;Acc:HGNC:27229]	1.49324
FLOT1	flotillin 1 [Source:HGNC Symbol;Acc:HGNC:3757]	1.49147
CDHR3	cadherin related family member 3 [Source:HGNC Symbol;Acc:HGNC:26308]	1.49028
AP1B1	adaptor related protein complex 1 subunit beta 1 [Source:HGNC Symbol;Acc:HGNC:554]	1.48977
IFNGR1	interferon gamma receptor 1 [Source:HGNC Symbol;Acc:HGNC:5439]	1.48868
ADAT2	adenosine deaminase tRNA specific 2 [Source:HGNC Symbol;Acc:HGNC:21172]	1.48814
RNASEL	ribonuclease L [Source:HGNC Symbol;Acc:HGNC:10050]	1.4881
MACROH2A2	macroH2A.2 histone [Source:HGNC Symbol;Acc:HGNC:14453]	1.48136
RAB34	RAB34, member RAS oncogene family [Source:HGNC Symbol;Acc:HGNC:16519]	1.47867
FAM71E1	family with sequence similarity 71 member E1 [Source:HGNC Symbol;Acc:HGNC:25107]	1.47629
B3GAT2	beta-1,3-glucuronyltransferase 2 [Source:HGNC Symbol;Acc:HGNC:922]	1.47604
EGLN3	egl-9 family hypoxia inducible factor 3 [Source:HGNC Symbol;Acc:HGNC:14661]	1.47597
CLUAP1	clusterin associated protein 1 [Source:HGNC Symbol;Acc:HGNC:19009]	1.47583
POLI	DNA polymerase iota [Source:HGNC Symbol;Acc:HGNC:9182]	1.47489
SNX2	sorting nexin 2 [Source:HGNC Symbol;Acc:HGNC:11173]	1.47238
FCGRT	Fc fragment of IgG receptor and transporter [Source:HGNC Symbol;Acc:HGNC:3621]	1.46703
DNAJB2	DnaJ heat shock protein family (Hsp40) member B2 [Source:HGNC Symbol;Acc:HGNC:5228]	1.46679
EPB41L3	erythrocyte membrane protein band 4.1 like 3 [Source:HGNC Symbol;Acc:HGNC:3380]	1.46653
SLC30A9	solute carrier family 30 member 9 [Source:HGNC Symbol;Acc:HGNC:1329]	1.46579
ITCH	itchy E3 ubiquitin protein ligase [Source:HGNC Symbol;Acc:HGNC:13890]	1.46394
CIDEB	cell death inducing DFFA like effector b [Source:HGNC Symbol;Acc:HGNC:1977]	1.46267
DIO3	iodothyronine deiodinase 3 [Source:HGNC Symbol;Acc:HGNC:2885]	1.4625
RSC1A1	regulator of solute carriers 1 [Source:HGNC Symbol;Acc:HGNC:10458]	1.46193
PORCN	porcupine O-acyltransferase [Source:HGNC Symbol;Acc:HGNC:17652]	1.46135
NOTCH1	notch receptor 1 [Source:HGNC Symbol;Acc:HGNC:7881]	1.46025
FCGR2A	Fc fragment of IgG receptor IIa [Source:HGNC Symbol;Acc:HGNC:3616]	1.4595
NPEPPS	aminopeptidase puromycin sensitive [Source:HGNC Symbol;Acc:HGNC:7900]	1.45879
C1GALT1	core 1 synthase, glycoprotein-N-acetylgalactosamine 3-beta-galactosyltransferase 1 [Source:HGNC Symbol;Acc:HGNC:24337]	1.45849
PECR	peroxisomal trans-2-enoyl-CoA reductase [Source:HGNC Symbol;Acc:HGNC:18281]	1.45509
SIRPB1	signal regulatory protein beta 1 [Source:HGNC Symbol;Acc:HGNC:15928]	1.45488
EMILIN1	elastin microfibril interfacer 1 [Source:HGNC Symbol;Acc:HGNC:19880]	1.45405
PCGF6	polycomb group ring finger 6 [Source:HGNC Symbol;Acc:HGNC:21156]	1.45285
TVP23B	trans-golgi network vesicle protein 23 homolog B [Source:HGNC Symbol;Acc:HGNC:20399]	1.45085
FAM167B	family with sequence similarity 167 member B [Source:HGNC Symbol;Acc:HGNC:28133]	1.4483
RAB27A	RAB27A, member RAS oncogene family [Source:HGNC Symbol;Acc:HGNC:9766]	1.44788
METTL18	methyltransferase like 18 [Source:HGNC Symbol;Acc:HGNC:28793]	1.4444
SUSD1	sushi domain containing 1 [Source:HGNC Symbol;Acc:HGNC:25413]	1.44398
METRN	meteorin, glial cell differentiation regulator [Source:HGNC Symbol;Acc:HGNC:14151]	1.44379
ADGRG5	adhesion G protein-coupled receptor G5 [Source:HGNC Symbol;Acc:HGNC:19010]	1.44309
ACAT2	acetyl-CoA acetyltransferase 2 [Source:HGNC Symbol;Acc:HGNC:94]	1.44277
PDK1	pyruvate dehydrogenase kinase 1 [Source:HGNC Symbol;Acc:HGNC:8809]	1.44245
SELENBP1	selenium binding protein 1 [Source:HGNC Symbol;Acc:HGNC:10719]	1.44176
KIF7	kinesin family member 7 [Source:HGNC Symbol;Acc:HGNC:30497]	1.43993
ESYT2	extended synaptotagmin 2 [Source:HGNC Symbol;Acc:HGNC:22211]	1.43781
GALK1	galactokinase 1 [Source:HGNC Symbol;Acc:HGNC:4118]	1.43764
MSANTD3-TMEFF1	MSANTD3-TMEFF1 readthrough [Source:HGNC Symbol;Acc:HGNC:38838]	1.43609
C5AR2	complement component 5a receptor 2 [Source:HGNC Symbol;Acc:HGNC:4527]	1.4357
SESN2	sestrin 2 [Source:HGNC Symbol;Acc:HGNC:20746]	1.43532
TCEAL1	transcription elongation factor A like 1 [Source:HGNC Symbol;Acc:HGNC:11616]	1.43514
NNMT	nicotinamide N-methyltransferase [Source:HGNC Symbol;Acc:HGNC:7861]	1.42949
GPRC5C	G protein-coupled receptor class C group 5 member C [Source:HGNC Symbol;Acc:HGNC:13309]	1.42882
SHANK1	SH3 and multiple ankyrin repeat domains 1 [Source:HGNC Symbol;Acc:HGNC:15474]	1.42857
MYADML2	myeloid associated differentiation marker like 2 [Source:HGNC Symbol;Acc:HGNC:34548]	1.42806
FAM171A1	family with sequence similarity 171 member A1 [Source:HGNC Symbol;Acc:HGNC:23522]	1.42768
TGFBR2	transforming growth factor beta receptor 2 [Source:HGNC Symbol;Acc:HGNC:11773]	1.42497
SLC25A51	solute carrier family 25 member 51 [Source:HGNC Symbol;Acc:HGNC:23323]	1.42424
DCK	deoxycytidine kinase [Source:HGNC Symbol;Acc:HGNC:2704]	1.42421
PDE1B	phosphodiesterase 1B [Source:HGNC Symbol;Acc:HGNC:8775]	1.42246
ZFAND1	zinc finger AN1-type containing 1 [Source:HGNC Symbol;Acc:HGNC:25858]	1.42243
HERC4	HECT and RLD domain containing E3 ubiquitin protein ligase 4 [Source:HGNC Symbol;Acc:HGNC:24521]	1.42221
KPNA4	karyopherin subunit alpha 4 [Source:HGNC Symbol;Acc:HGNC:6397]	1.42218
SLC7A13	solute carrier family 7 member 13 [Source:HGNC Symbol;Acc:HGNC:23092]	1.41827
MACROD1	mono-ADP ribosylhydrolase 1 [Source:HGNC Symbol;Acc:HGNC:29598]	1.41782
BMP6	bone morphogenetic protein 6 [Source:HGNC Symbol;Acc:HGNC:1073]	1.41667
RGL3	ral guanine nucleotide dissociation stimulator like 3 [Source:HGNC Symbol;Acc:HGNC:30282]	1.41653
MS4A8	membrane spanning 4-domains A8 [Source:HGNC Symbol;Acc:HGNC:13380]	1.41613
CTSD	cathepsin D [Source:HGNC Symbol;Acc:HGNC:2529]	1.41239
ZDHHC23	zinc finger DHHC-type palmitoyltransferase 23 [Source:HGNC Symbol;Acc:HGNC:28654]	1.41064
RPL9	ribosomal protein L9 [Source:HGNC Symbol;Acc:HGNC:10369]	1.41036
MFNG	MFNG O-fucosylpeptide 3-beta-N-acetylglucosaminyltransferase [Source:HGNC Symbol;Acc:HGNC:7038]	1.4094
RMDN1	regulator of microtubule dynamics 1 [Source:HGNC Symbol;Acc:HGNC:24285]	1.40763
ORMDL3	ORMDL sphingolipid biosynthesis regulator 3 [Source:HGNC Symbol;Acc:HGNC:16038]	1.40708
TLR4	toll like receptor 4 [Source:HGNC Symbol;Acc:HGNC:11850]	1.40686
RHEBL1	RHEB like 1 [Source:HGNC Symbol;Acc:HGNC:21166]	1.4052
CTSF	cathepsin F [Source:HGNC Symbol;Acc:HGNC:2531]	1.40444
GADD45G	growth arrest and DNA damage inducible gamma [Source:HGNC Symbol;Acc:HGNC:4097]	1.40387
MZT2B	mitotic spindle organizing protein 2B [Source:HGNC Symbol;Acc:HGNC:25886]	1.40387
FAM219A	family with sequence similarity 219 member A [Source:HGNC Symbol;Acc:HGNC:19920]	1.40307
FSTL3	follistatin like 3 [Source:HGNC Symbol;Acc:HGNC:3973]	1.40294
CIB2	calcium and integrin binding family member 2 [Source:HGNC Symbol;Acc:HGNC:24579]	1.40264
SMCO3	single-pass membrane protein with coiled-coil domains 3 [Source:HGNC Symbol;Acc:HGNC:34401]	1.40208
AIG1	androgen induced 1 [Source:HGNC Symbol;Acc:HGNC:21607]	1.39894
MGAT4A	alpha-1,3-mannosyl-glycoprotein 4-beta-N-acetylglucosaminyltransferase A [Source:HGNC Symbol;Acc:HGNC:7047]	1.3963
ITGAM	integrin subunit alpha M [Source:HGNC Symbol;Acc:HGNC:6149]	1.39531
CTSG	cathepsin G [Source:HGNC Symbol;Acc:HGNC:2532]	1.39524
RMND5B	required for meiotic nuclear division 5 homolog B [Source:HGNC Symbol;Acc:HGNC:26181]	1.39271
SLC36A2	solute carrier family 36 member 2 [Source:HGNC Symbol;Acc:HGNC:18762]	1.39171
TREML1	triggering receptor expressed on myeloid cells like 1 [Source:HGNC Symbol;Acc:HGNC:20434]	1.3902
EIF4A2	eukaryotic translation initiation factor 4A2 [Source:HGNC Symbol;Acc:HGNC:3284]	1.389
C20orf144	chromosome 20 open reading frame 144 [Source:HGNC Symbol;Acc:HGNC:16137]	1.38898
HIPK4	homeodomain interacting protein kinase 4 [Source:HGNC Symbol;Acc:HGNC:19007]	1.38896
TMEM218	transmembrane protein 218 [Source:HGNC Symbol;Acc:HGNC:27344]	1.38671
PRELID2	PRELI domain containing 2 [Source:HGNC Symbol;Acc:HGNC:28306]	1.38649
MMEL1	membrane metalloendopeptidase like 1 [Source:HGNC Symbol;Acc:HGNC:14668]	1.38561
GPT	glutamic--pyruvic transaminase [Source:HGNC Symbol;Acc:HGNC:4552]	1.38525
ABCC9	ATP binding cassette subfamily C member 9 [Source:HGNC Symbol;Acc:HGNC:60]	1.3809
KRTCAP2	keratinocyte associated protein 2 [Source:HGNC Symbol;Acc:HGNC:28942]	1.37992
VARS2	valyl-tRNA synthetase 2, mitochondrial [Source:HGNC Symbol;Acc:HGNC:21642]	1.3798
VIL1	villin 1 [Source:HGNC Symbol;Acc:HGNC:12690]	1.37932
ARHGEF3	Rho guanine nucleotide exchange factor 3 [Source:HGNC Symbol;Acc:HGNC:683]	1.37928
SLC25A36	solute carrier family 25 member 36 [Source:HGNC Symbol;Acc:HGNC:25554]	1.37767
CHAC1	ChaC glutathione specific gamma-glutamylcyclotransferase 1 [Source:HGNC Symbol;Acc:HGNC:28680]	1.37623
MMP27	matrix metallopeptidase 27 [Source:HGNC Symbol;Acc:HGNC:14250]	1.37618
RAB44	RAB44, member RAS oncogene family [Source:HGNC Symbol;Acc:HGNC:21068]	1.37504
PKD1L3	polycystin 1 like 3, transient receptor potential channel interacting [Source:HGNC Symbol;Acc:HGNC:21716]	1.37403
CYP26A1	cytochrome P450 family 26 subfamily A member 1 [Source:HGNC Symbol;Acc:HGNC:2603]	1.37399
THRA	thyroid hormone receptor alpha [Source:HGNC Symbol;Acc:HGNC:11796]	1.3724
SCRT2	scratch family transcriptional repressor 2 [Source:HGNC Symbol;Acc:HGNC:15952]	1.37146
ZNF449	zinc finger protein 449 [Source:HGNC Symbol;Acc:HGNC:21039]	1.37084
SLC8B1	solute carrier family 8 member B1 [Source:HGNC Symbol;Acc:HGNC:26175]	1.37032
ANTKMT	adenine nucleotide translocase lysine methyltransferase [Source:HGNC Symbol;Acc:HGNC:14152]	1.37003
MMAB	metabolism of cobalamin associated B [Source:HGNC Symbol;Acc:HGNC:19331]	1.36967
AKAP17A	A-kinase anchoring protein 17A [Source:HGNC Symbol;Acc:HGNC:18783]	1.36751
CEP19	centrosomal protein 19 [Source:HGNC Symbol;Acc:HGNC:28209]	1.36655
MFSD4B	major facilitator superfamily domain containing 4B [Source:HGNC Symbol;Acc:HGNC:21053]	1.36561
PCGF2	polycomb group ring finger 2 [Source:HGNC Symbol;Acc:HGNC:12929]	1.36398
GLT8D2	glycosyltransferase 8 domain containing 2 [Source:HGNC Symbol;Acc:HGNC:24890]	1.36193
INCA1	inhibitor of CDK, cyclin A1 interacting protein 1 [Source:HGNC Symbol;Acc:HGNC:32224]	1.36057
RACK1	receptor for activated C kinase 1 [Source:HGNC Symbol;Acc:HGNC:4399]	1.3604
UNC13A	unc-13 homolog A [Source:HGNC Symbol;Acc:HGNC:23150]	1.36029
CCIN	calicin [Source:HGNC Symbol;Acc:HGNC:1568]	1.35974
PDGFRL	platelet derived growth factor receptor like [Source:HGNC Symbol;Acc:HGNC:8805]	1.35892
SLC35E3	solute carrier family 35 member E3 [Source:HGNC Symbol;Acc:HGNC:20864]	1.35852
RAPGEFL1	Rap guanine nucleotide exchange factor like 1 [Source:HGNC Symbol;Acc:HGNC:17428]	1.35851
PDZD7	PDZ domain containing 7 [Source:HGNC Symbol;Acc:HGNC:26257]	1.35737
SAMSN1	SAM domain, SH3 domain and nuclear localization signals 1 [Source:HGNC Symbol;Acc:HGNC:10528]	1.35722
IER3	immediate early response 3 [Source:HGNC Symbol;Acc:HGNC:5392]	1.35666
SMIM15	small integral membrane protein 15 [Source:HGNC Symbol;Acc:HGNC:33861]	1.35665
SPRED3	sprouty related EVH1 domain containing 3 [Source:HGNC Symbol;Acc:HGNC:31041]	1.35622
TM7SF3	transmembrane 7 superfamily member 3 [Source:HGNC Symbol;Acc:HGNC:23049]	1.3548
RPL24	ribosomal protein L24 [Source:HGNC Symbol;Acc:HGNC:10325]	1.3544
LYZ	lysozyme [Source:HGNC Symbol;Acc:HGNC:6740]	1.35407
ATG2B	autophagy related 2B [Source:HGNC Symbol;Acc:HGNC:20187]	1.35308
OGFOD2	2-oxoglutarate and iron dependent oxygenase domain containing 2 [Source:HGNC Symbol;Acc:HGNC:25823]	1.35275
SLC37A4	solute carrier family 37 member 4 [Source:HGNC Symbol;Acc:HGNC:4061]	1.35235
FBXO44	F-box protein 44 [Source:HGNC Symbol;Acc:HGNC:24847]	1.35226
ZNF420	zinc finger protein 420 [Source:HGNC Symbol;Acc:HGNC:20649]	1.3513
SALL2	spalt like transcription factor 2 [Source:HGNC Symbol;Acc:HGNC:10526]	1.35098
DDHD2	DDHD domain containing 2 [Source:HGNC Symbol;Acc:HGNC:29106]	1.35052
RIN3	Ras and Rab interactor 3 [Source:HGNC Symbol;Acc:HGNC:18751]	1.34957
AMT	aminomethyltransferase [Source:HGNC Symbol;Acc:HGNC:473]	1.34947
HEXIM2	HEXIM P-TEFb complex subunit 2 [Source:HGNC Symbol;Acc:HGNC:28591]	1.34947
SPTB	spectrin beta, erythrocytic [Source:HGNC Symbol;Acc:HGNC:11274]	1.34857
PCSK4	proprotein convertase subtilisin/kexin type 4 [Source:HGNC Symbol;Acc:HGNC:8746]	1.34845
PDE4D	phosphodiesterase 4D [Source:HGNC Symbol;Acc:HGNC:8783]	1.34746
PMM1	phosphomannomutase 1 [Source:HGNC Symbol;Acc:HGNC:9114]	1.34711
RAP2A	RAP2A, member of RAS oncogene family [Source:HGNC Symbol;Acc:HGNC:9861]	1.34525
NIPSNAP1	nipsnap homolog 1 [Source:HGNC Symbol;Acc:HGNC:7827]	1.34382
HACL1	2-hydroxyacyl-CoA lyase 1 [Source:HGNC Symbol;Acc:HGNC:17856]	1.34163
DNAH14	dynein axonemal heavy chain 14 [Source:HGNC Symbol;Acc:HGNC:2945]	1.34108
CASP3	caspase 3 [Source:HGNC Symbol;Acc:HGNC:1504]	1.33977
CHP2	calcineurin like EF-hand protein 2 [Source:HGNC Symbol;Acc:HGNC:24927]	1.33938
IQCC	IQ motif containing C [Source:HGNC Symbol;Acc:HGNC:25545]	1.33782
SRL	sarcalumenin [Source:HGNC Symbol;Acc:HGNC:11295]	1.33652
LMBR1	limb development membrane protein 1 [Source:HGNC Symbol;Acc:HGNC:13243]	1.33641
RPL3	ribosomal protein L3 [Source:HGNC Symbol;Acc:HGNC:10332]	1.3341
ANXA3	annexin A3 [Source:HGNC Symbol;Acc:HGNC:541]	1.33354
RAB3A	RAB3A, member RAS oncogene family [Source:HGNC Symbol;Acc:HGNC:9777]	1.33346
PPEF1	protein phosphatase with EF-hand domain 1 [Source:HGNC Symbol;Acc:HGNC:9243]	1.33333
RNF217	ring finger protein 217 [Source:HGNC Symbol;Acc:HGNC:21487]	1.32727
RPL13	ribosomal protein L13 [Source:HGNC Symbol;Acc:HGNC:10303]	1.32616
HOXB3	homeobox B3 [Source:HGNC Symbol;Acc:HGNC:5114]	1.32569
DCHS1	dachsous cadherin-related 1 [Source:HGNC Symbol;Acc:HGNC:13681]	1.32476
LIFR	LIF receptor subunit alpha [Source:HGNC Symbol;Acc:HGNC:6597]	1.32405
STX7	syntaxin 7 [Source:HGNC Symbol;Acc:HGNC:11442]	1.32355
MUC13	mucin 13, cell surface associated [Source:HGNC Symbol;Acc:HGNC:7511]	1.32351
ST3GAL4	ST3 beta-galactoside alpha-2,3-sialyltransferase 4 [Source:HGNC Symbol;Acc:HGNC:10864]	1.32245
FOLR2	folate receptor beta [Source:HGNC Symbol;Acc:HGNC:3793]	1.32189
C2CD2L	C2CD2 like [Source:HGNC Symbol;Acc:HGNC:29000]	1.32169
RGS7BP	regulator of G protein signaling 7 binding protein [Source:HGNC Symbol;Acc:HGNC:23271]	1.32096
VCAN	versican [Source:HGNC Symbol;Acc:HGNC:2464]	1.31976
HID1	HID1 domain containing [Source:HGNC Symbol;Acc:HGNC:15736]	1.31886
ZNF654	zinc finger protein 654 [Source:HGNC Symbol;Acc:HGNC:25612]	1.31708
MTUS1	microtubule associated scaffold protein 1 [Source:HGNC Symbol;Acc:HGNC:29789]	1.31514
ARHGEF19	Rho guanine nucleotide exchange factor 19 [Source:HGNC Symbol;Acc:HGNC:26604]	1.31442
TMX3	thioredoxin related transmembrane protein 3 [Source:HGNC Symbol;Acc:HGNC:24718]	1.31394
IVNS1ABP	influenza virus NS1A binding protein [Source:HGNC Symbol;Acc:HGNC:16951]	1.31373
NDRG1	N-myc downstream regulated 1 [Source:HGNC Symbol;Acc:HGNC:7679]	1.31279
RPL30	ribosomal protein L30 [Source:HGNC Symbol;Acc:HGNC:10333]	1.31268
FUT7	fucosyltransferase 7 [Source:HGNC Symbol;Acc:HGNC:4018]	1.31237
NPL	N-acetylneuraminate pyruvate lyase [Source:HGNC Symbol;Acc:HGNC:16781]	1.31216
TBC1D2	TBC1 domain family member 2 [Source:HGNC Symbol;Acc:HGNC:18026]	1.31204
TIMP3	TIMP metallopeptidase inhibitor 3 [Source:HGNC Symbol;Acc:HGNC:11822]	1.31164
ENTPD5	ectonucleoside triphosphate diphosphohydrolase 5 (inactive) [Source:HGNC Symbol;Acc:HGNC:3367]	1.31108
MEX3B	mex-3 RNA binding family member B [Source:HGNC Symbol;Acc:HGNC:25297]	1.31098
DQX1	DEAQ-box RNA dependent ATPase 1 [Source:HGNC Symbol;Acc:HGNC:20410]	1.30991
SPTSSA	serine palmitoyltransferase small subunit A [Source:HGNC Symbol;Acc:HGNC:20361]	1.30928
SYT13	synaptotagmin 13 [Source:HGNC Symbol;Acc:HGNC:14962]	1.30846
AXDND1	axonemal dynein light chain domain containing 1 [Source:HGNC Symbol;Acc:HGNC:26564]	1.30808
HOXA2	homeobox A2 [Source:HGNC Symbol;Acc:HGNC:5103]	1.30765
ASNSD1	asparagine synthetase domain containing 1 [Source:HGNC Symbol;Acc:HGNC:24910]	1.30724
RNF122	ring finger protein 122 [Source:HGNC Symbol;Acc:HGNC:21147]	1.30669
PYROXD2	pyridine nucleotide-disulphide oxidoreductase domain 2 [Source:HGNC Symbol;Acc:HGNC:23517]	1.30657
NYNRIN	NYN domain and retroviral integrase containing [Source:HGNC Symbol;Acc:HGNC:20165]	1.30555
CTDSPL	CTD small phosphatase like [Source:HGNC Symbol;Acc:HGNC:16890]	1.30541
TXNDC5	thioredoxin domain containing 5 [Source:HGNC Symbol;Acc:HGNC:21073]	1.30456
UCP1	uncoupling protein 1 [Source:HGNC Symbol;Acc:HGNC:12517]	1.30295
FN3K	fructosamine 3 kinase [Source:HGNC Symbol;Acc:HGNC:24822]	1.30205
PNKP	polynucleotide kinase 3'-phosphatase [Source:HGNC Symbol;Acc:HGNC:9154]	1.30199
DIPK1B	divergent protein kinase domain 1B [Source:HGNC Symbol;Acc:HGNC:28290]	1.30164
MCFD2	multiple coagulation factor deficiency 2, ER cargo receptor complex subunit [Source:HGNC Symbol;Acc:HGNC:18451]	1.3012
IMPA2	inositol monophosphatase 2 [Source:HGNC Symbol;Acc:HGNC:6051]	1.30117
MT-TE	mitochondrially encoded tRNA-Glu (GAA/G) [Source:HGNC Symbol;Acc:HGNC:7479]	1.30047
NKG7	natural killer cell granule protein 7 [Source:HGNC Symbol;Acc:HGNC:7830]	1.30036
NPHS2	NPHS2 stomatin family member, podocin [Source:HGNC Symbol;Acc:HGNC:13394]	1.29891
ITGB7	integrin subunit beta 7 [Source:HGNC Symbol;Acc:HGNC:6162]	1.29633
EPM2AIP1	EPM2A interacting protein 1 [Source:HGNC Symbol;Acc:HGNC:19735]	1.29569
LOXL2	lysyl oxidase like 2 [Source:HGNC Symbol;Acc:HGNC:6666]	1.29542
KCNN3	potassium calcium-activated channel subfamily N member 3 [Source:HGNC Symbol;Acc:HGNC:6292]	1.29441
CCDC106	coiled-coil domain containing 106 [Source:HGNC Symbol;Acc:HGNC:30181]	1.29337
AQP1	aquaporin 1 (Colton blood group) [Source:HGNC Symbol;Acc:HGNC:633]	1.29197
WTIP	WT1 interacting protein [Source:HGNC Symbol;Acc:HGNC:20964]	1.29037
CPED1	cadherin like and PC-esterase domain containing 1 [Source:HGNC Symbol;Acc:HGNC:26159]	1.28891
SBNO2	strawberry notch homolog 2 [Source:HGNC Symbol;Acc:HGNC:29158]	1.28856
CREB3L2	cAMP responsive element binding protein 3 like 2 [Source:HGNC Symbol;Acc:HGNC:23720]	1.28854
SLC2A8	solute carrier family 2 member 8 [Source:HGNC Symbol;Acc:HGNC:13812]	1.28681
ZFPM1	zinc finger protein, FOG family member 1 [Source:HGNC Symbol;Acc:HGNC:19762]	1.28636
PLAG1	PLAG1 zinc finger [Source:HGNC Symbol;Acc:HGNC:9045]	1.28444
UNC119	unc-119 lipid binding chaperone [Source:HGNC Symbol;Acc:HGNC:12565]	1.28413
CIART	circadian associated repressor of transcription [Source:HGNC Symbol;Acc:HGNC:25200]	1.28412
PRPF40B	pre-mRNA processing factor 40 homolog B [Source:HGNC Symbol;Acc:HGNC:25031]	1.28224
CRYZL1	crystallin zeta like 1 [Source:HGNC Symbol;Acc:HGNC:2420]	1.28087
FBXO36	F-box protein 36 [Source:HGNC Symbol;Acc:HGNC:27020]	1.27955
TMEM41A	transmembrane protein 41A [Source:HGNC Symbol;Acc:HGNC:30544]	1.27941
AIFM2	apoptosis inducing factor mitochondria associated 2 [Source:HGNC Symbol;Acc:HGNC:21411]	1.2783
BACH2	BTB domain and CNC homolog 2 [Source:HGNC Symbol;Acc:HGNC:14078]	1.27824
LTC4S	leukotriene C4 synthase [Source:HGNC Symbol;Acc:HGNC:6719]	1.27791
WWTR1	WW domain containing transcription regulator 1 [Source:HGNC Symbol;Acc:HGNC:24042]	1.27648
CLEC6A	C-type lectin domain containing 6A [Source:HGNC Symbol;Acc:HGNC:14556]	1.27627
PARD6G	par-6 family cell polarity regulator gamma [Source:HGNC Symbol;Acc:HGNC:16076]	1.27587
TBL2	transducin beta like 2 [Source:HGNC Symbol;Acc:HGNC:11586]	1.2742
KDM4B	lysine demethylase 4B [Source:HGNC Symbol;Acc:HGNC:29136]	1.27297
GLB1L2	galactosidase beta 1 like 2 [Source:HGNC Symbol;Acc:HGNC:25129]	1.2727
TSTD1	thiosulfate sulfurtransferase like domain containing 1 [Source:HGNC Symbol;Acc:HGNC:35410]	1.27219
C2orf81	chromosome 2 open reading frame 81 [Source:HGNC Symbol;Acc:HGNC:34350]	1.26956
BTBD3	BTB domain containing 3 [Source:HGNC Symbol;Acc:HGNC:15854]	1.26866
DMPK	DM1 protein kinase [Source:HGNC Symbol;Acc:HGNC:2933]	1.26752
CEACAM1	CEA cell adhesion molecule 1 [Source:HGNC Symbol;Acc:HGNC:1814]	1.26744
HSPA13	heat shock protein family A (Hsp70) member 13 [Source:HGNC Symbol;Acc:HGNC:11375]	1.26704
PGAP6	post-glycosylphosphatidylinositol attachment to proteins 6 [Source:HGNC Symbol;Acc:HGNC:17205]	1.26563
SLC22A17	solute carrier family 22 member 17 [Source:HGNC Symbol;Acc:HGNC:23095]	1.26361
KIF3A	kinesin family member 3A [Source:HGNC Symbol;Acc:HGNC:6319]	1.26255
ATRNL1	attractin like 1 [Source:HGNC Symbol;Acc:HGNC:29063]	1.26107
ATP23	ATP23 metallopeptidase and ATP synthase assembly factor homolog [Source:HGNC Symbol;Acc:HGNC:29452]	1.25941
DDIT4	DNA damage inducible transcript 4 [Source:HGNC Symbol;Acc:HGNC:24944]	1.25929
NEU3	neuraminidase 3 [Source:HGNC Symbol;Acc:HGNC:7760]	1.25912
IKZF2	IKAROS family zinc finger 2 [Source:HGNC Symbol;Acc:HGNC:13177]	1.25882
FAM178B	family with sequence similarity 178 member B [Source:HGNC Symbol;Acc:HGNC:28036]	1.25878
VPS13C	vacuolar protein sorting 13 homolog C [Source:HGNC Symbol;Acc:HGNC:23594]	1.25851
PADI3	peptidyl arginine deiminase 3 [Source:HGNC Symbol;Acc:HGNC:18337]	1.258
CEP43	centrosomal protein 43 [Source:HGNC Symbol;Acc:HGNC:17012]	1.2576
FAM187B	family with sequence similarity 187 member B [Source:HGNC Symbol;Acc:HGNC:26366]	1.25757
C3orf18	chromosome 3 open reading frame 18 [Source:HGNC Symbol;Acc:HGNC:24837]	1.25651
ATPAF1	ATP synthase mitochondrial F1 complex assembly factor 1 [Source:HGNC Symbol;Acc:HGNC:18803]	1.25581
CD34	CD34 molecule [Source:HGNC Symbol;Acc:HGNC:1662]	1.25502
CYP2J2	cytochrome P450 family 2 subfamily J member 2 [Source:HGNC Symbol;Acc:HGNC:2634]	1.25369
IRAG1	inositol 1,4,5-triphosphate receptor associated 1 [Source:HGNC Symbol;Acc:HGNC:7237]	1.25323
CCDC159	coiled-coil domain containing 159 [Source:HGNC Symbol;Acc:HGNC:26996]	1.25258
PLD1	phospholipase D1 [Source:HGNC Symbol;Acc:HGNC:9067]	1.25207
TIGD3	tigger transposable element derived 3 [Source:HGNC Symbol;Acc:HGNC:18334]	1.24906
ESM1	endothelial cell specific molecule 1 [Source:HGNC Symbol;Acc:HGNC:3466]	1.24755
CETN4P	centrin 4, pseudogene [Source:HGNC Symbol;Acc:HGNC:35450]	1.24717
AGFG2	ArfGAP with FG repeats 2 [Source:HGNC Symbol;Acc:HGNC:5177]	1.24622
ATP10D	ATPase phospholipid transporting 10D (putative) [Source:HGNC Symbol;Acc:HGNC:13549]	1.24569
NTN4	netrin 4 [Source:HGNC Symbol;Acc:HGNC:13658]	1.24522
GNAZ	G protein subunit alpha z [Source:HGNC Symbol;Acc:HGNC:4395]	1.24365
TMEM185A	transmembrane protein 185A [Source:HGNC Symbol;Acc:HGNC:17125]	1.24352
ZNF28	zinc finger protein 28 [Source:HGNC Symbol;Acc:HGNC:13073]	1.24247
KLHL9	kelch like family member 9 [Source:HGNC Symbol;Acc:HGNC:18732]	1.24224
SIDT2	SID1 transmembrane family member 2 [Source:HGNC Symbol;Acc:HGNC:24272]	1.24135
CCDC38	coiled-coil domain containing 38 [Source:HGNC Symbol;Acc:HGNC:26843]	1.24106
CACFD1	calcium channel flower domain containing 1 [Source:HGNC Symbol;Acc:HGNC:1365]	1.24055
PRELP	proline and arginine rich end leucine rich repeat protein [Source:HGNC Symbol;Acc:HGNC:9357]	1.23805
GPIHBP1	glycosylphosphatidylinositol anchored high density lipoprotein binding protein 1 [Source:HGNC Symbol;Acc:HGNC:24945]	1.23747
ABCB7	ATP binding cassette subfamily B member 7 [Source:HGNC Symbol;Acc:HGNC:48]	1.23684
TMEM203	transmembrane protein 203 [Source:HGNC Symbol;Acc:HGNC:28217]	1.2363
LRRC8B	leucine rich repeat containing 8 VRAC subunit B [Source:HGNC Symbol;Acc:HGNC:30692]	1.23599
MYL6B	myosin light chain 6B [Source:HGNC Symbol;Acc:HGNC:29823]	1.23516
PVRIG	PVR related immunoglobulin domain containing [Source:HGNC Symbol;Acc:HGNC:32190]	1.23422
ADIPOR2	adiponectin receptor 2 [Source:HGNC Symbol;Acc:HGNC:24041]	1.23333
ABCD2	ATP binding cassette subfamily D member 2 [Source:HGNC Symbol;Acc:HGNC:66]	1.23198
TIAM2	TIAM Rac1 associated GEF 2 [Source:HGNC Symbol;Acc:HGNC:11806]	1.23113
PIGY	phosphatidylinositol glycan anchor biosynthesis class Y [Source:HGNC Symbol;Acc:HGNC:28213]	1.23076
IL1R2	interleukin 1 receptor type 2 [Source:HGNC Symbol;Acc:HGNC:5994]	1.2302
PHF10	PHD finger protein 10 [Source:HGNC Symbol;Acc:HGNC:18250]	1.22987
LAMB2	laminin subunit beta 2 [Source:HGNC Symbol;Acc:HGNC:6487]	1.22974
VPS37D	VPS37D subunit of ESCRT-I [Source:HGNC Symbol;Acc:HGNC:18287]	1.22946
SNAP29	synaptosome associated protein 29 [Source:HGNC Symbol;Acc:HGNC:11133]	1.2294
PRORSD1P	prolyl-tRNA synthetase associated domain containing 1, pseudogene [Source:HGNC Symbol;Acc:HGNC:34379]	1.22891
CTH	cystathionine gamma-lyase [Source:HGNC Symbol;Acc:HGNC:2501]	1.22752
EHBP1	EH domain binding protein 1 [Source:HGNC Symbol;Acc:HGNC:29144]	1.22604
CPLANE2	ciliogenesis and planar polarity effector 2 [Source:HGNC Symbol;Acc:HGNC:28127]	1.22535
TMEM236	transmembrane protein 236 [Source:HGNC Symbol;Acc:HGNC:23473]	1.22529
COX7A2L	cytochrome c oxidase subunit 7A2 like [Source:HGNC Symbol;Acc:HGNC:2289]	1.22509
ZNF219	zinc finger protein 219 [Source:HGNC Symbol;Acc:HGNC:13011]	1.22372
ZNF667	zinc finger protein 667 [Source:HGNC Symbol;Acc:HGNC:28854]	1.22339
CCDC73	coiled-coil domain containing 73 [Source:HGNC Symbol;Acc:HGNC:23261]	1.22312
PRSS23	serine protease 23 [Source:HGNC Symbol;Acc:HGNC:14370]	1.22241
ERN1	endoplasmic reticulum to nucleus signaling 1 [Source:HGNC Symbol;Acc:HGNC:3449]	1.22172
RARRES2	retinoic acid receptor responder 2 [Source:HGNC Symbol;Acc:HGNC:9868]	1.22137
PPT1	palmitoyl-protein thioesterase 1 [Source:HGNC Symbol;Acc:HGNC:9325]	1.22101
PEX11A	peroxisomal biogenesis factor 11 alpha [Source:HGNC Symbol;Acc:HGNC:8852]	1.22073
WWOX	WW domain containing oxidoreductase [Source:HGNC Symbol;Acc:HGNC:12799]	1.2205
CMTM6	CKLF like MARVEL transmembrane domain containing 6 [Source:HGNC Symbol;Acc:HGNC:19177]	1.22006
NIPA2	NIPA magnesium transporter 2 [Source:HGNC Symbol;Acc:HGNC:17044]	1.21993
TNS4	tensin 4 [Source:HGNC Symbol;Acc:HGNC:24352]	1.21582
TCF24	transcription factor 24 [Source:HGNC Symbol;Acc:HGNC:32275]	1.21551
ZNF226	zinc finger protein 226 [Source:HGNC Symbol;Acc:HGNC:13019]	1.21482
TMEM65	transmembrane protein 65 [Source:HGNC Symbol;Acc:HGNC:25203]	1.21451
RIPPLY3	ripply transcriptional repressor 3 [Source:HGNC Symbol;Acc:HGNC:3047]	1.2141
PGAM2	phosphoglycerate mutase 2 [Source:HGNC Symbol;Acc:HGNC:8889]	1.21294
PPP1R32	protein phosphatase 1 regulatory subunit 32 [Source:HGNC Symbol;Acc:HGNC:28869]	1.21292
FBXO17	F-box protein 17 [Source:HGNC Symbol;Acc:HGNC:18754]	1.2127
SPRY2	sprouty RTK signaling antagonist 2 [Source:HGNC Symbol;Acc:HGNC:11270]	1.20931
PTS	6-pyruvoyltetrahydropterin synthase [Source:HGNC Symbol;Acc:HGNC:9689]	1.20924
UHRF1BP1	UHRF1 binding protein 1 [Source:HGNC Symbol;Acc:HGNC:21216]	1.20884
MAN2A2	mannosidase alpha class 2A member 2 [Source:HGNC Symbol;Acc:HGNC:6825]	1.20856
RO60	Ro60, Y RNA binding protein [Source:HGNC Symbol;Acc:HGNC:11313]	1.20787
PSPN	persephin [Source:HGNC Symbol;Acc:HGNC:9579]	1.20778
PTK7	protein tyrosine kinase 7 (inactive) [Source:HGNC Symbol;Acc:HGNC:9618]	1.20757
AP2A2	adaptor related protein complex 2 subunit alpha 2 [Source:HGNC Symbol;Acc:HGNC:562]	1.20741
BMP2K	BMP2 inducible kinase [Source:HGNC Symbol;Acc:HGNC:18041]	1.20669
GNB5	G protein subunit beta 5 [Source:HGNC Symbol;Acc:HGNC:4401]	1.20658
CYB5RL	cytochrome b5 reductase like [Source:HGNC Symbol;Acc:HGNC:32220]	1.20639
PLCG1	phospholipase C gamma 1 [Source:HGNC Symbol;Acc:HGNC:9065]	1.20637
ADORA2B	adenosine A2b receptor [Source:HGNC Symbol;Acc:HGNC:264]	1.20521
IGIP	IgA inducing protein [Source:HGNC Symbol;Acc:HGNC:33847]	1.205
NARS2	asparaginyl-tRNA synthetase 2, mitochondrial [Source:HGNC Symbol;Acc:HGNC:26274]	1.20328
GNG10	G protein subunit gamma 10 [Source:HGNC Symbol;Acc:HGNC:4402]	1.20308
FURIN	furin, paired basic amino acid cleaving enzyme [Source:HGNC Symbol;Acc:HGNC:8568]	1.20265
MAML3	mastermind like transcriptional coactivator 3 [Source:HGNC Symbol;Acc:HGNC:16272]	1.20209
ZNF606	zinc finger protein 606 [Source:HGNC Symbol;Acc:HGNC:25879]	1.20171
SUOX	sulfite oxidase [Source:HGNC Symbol;Acc:HGNC:11460]	1.20052
RPS20	ribosomal protein S20 [Source:HGNC Symbol;Acc:HGNC:10405]	1.19978
RANBP6	RAN binding protein 6 [Source:HGNC Symbol;Acc:HGNC:9851]	1.19955
NABP1	nucleic acid binding protein 1 [Source:HGNC Symbol;Acc:HGNC:26232]	1.19702
ENO3	enolase 3 [Source:HGNC Symbol;Acc:HGNC:3354]	1.19689
MTMR3	myotubularin related protein 3 [Source:HGNC Symbol;Acc:HGNC:7451]	1.19577
RD3	retinal degeneration 3, GUCY2D regulator [Source:HGNC Symbol;Acc:HGNC:19689]	1.19561
MFSD9	major facilitator superfamily domain containing 9 [Source:HGNC Symbol;Acc:HGNC:28158]	1.19544
GIMAP8	GTPase, IMAP family member 8 [Source:HGNC Symbol;Acc:HGNC:21792]	1.19527
CD93	CD93 molecule [Source:HGNC Symbol;Acc:HGNC:15855]	1.19476
SNX18	sorting nexin 18 [Source:HGNC Symbol;Acc:HGNC:19245]	1.19471
TMCO1	transmembrane and coiled-coil domains 1 [Source:HGNC Symbol;Acc:HGNC:18188]	1.19456
ECM2	extracellular matrix protein 2 [Source:HGNC Symbol;Acc:HGNC:3154]	1.19419
MSH5	mutS homolog 5 [Source:HGNC Symbol;Acc:HGNC:7328]	1.194
RUNDC3A	RUN domain containing 3A [Source:HGNC Symbol;Acc:HGNC:16984]	1.19358
VOPP1	VOPP1 WW domain binding protein [Source:HGNC Symbol;Acc:HGNC:34518]	1.19201
WSB1	WD repeat and SOCS box containing 1 [Source:HGNC Symbol;Acc:HGNC:19221]	1.19196
BORCS5	BLOC-1 related complex subunit 5 [Source:HGNC Symbol;Acc:HGNC:17950]	1.19143
GPR160	G protein-coupled receptor 160 [Source:HGNC Symbol;Acc:HGNC:23693]	1.1912
RHOBTB1	Rho related BTB domain containing 1 [Source:HGNC Symbol;Acc:HGNC:18738]	1.18998
MINDY2	MINDY lysine 48 deubiquitinase 2 [Source:HGNC Symbol;Acc:HGNC:26954]	1.18991
THBS1	thrombospondin 1 [Source:HGNC Symbol;Acc:HGNC:11785]	1.18851
FKBP11	FKBP prolyl isomerase 11 [Source:HGNC Symbol;Acc:HGNC:18624]	1.18736
FBXO39	F-box protein 39 [Source:HGNC Symbol;Acc:HGNC:28565]	1.18712
DBNDD2	dysbindin domain containing 2 [Source:HGNC Symbol;Acc:HGNC:15881]	1.1869
ENPP1	ectonucleotide pyrophosphatase/phosphodiesterase 1 [Source:HGNC Symbol;Acc:HGNC:3356]	1.18427
VSIG4	V-set and immunoglobulin domain containing 4 [Source:HGNC Symbol;Acc:HGNC:17032]	1.18275
PGK1	phosphoglycerate kinase 1 [Source:HGNC Symbol;Acc:HGNC:8896]	1.18032
CD38	CD38 molecule [Source:HGNC Symbol;Acc:HGNC:1667]	1.17985
TCF7L2	transcription factor 7 like 2 [Source:HGNC Symbol;Acc:HGNC:11641]	1.1796
RPS9	ribosomal protein S9 [Source:HGNC Symbol;Acc:HGNC:10442]	1.17905
KIFC2	kinesin family member C2 [Source:HGNC Symbol;Acc:HGNC:29530]	1.17806
CEP131	centrosomal protein 131 [Source:HGNC Symbol;Acc:HGNC:29511]	1.17755
ITGA7	integrin subunit alpha 7 [Source:HGNC Symbol;Acc:HGNC:6143]	1.17684
TTC23	tetratricopeptide repeat domain 23 [Source:HGNC Symbol;Acc:HGNC:25730]	1.17649
NID1	nidogen 1 [Source:HGNC Symbol;Acc:HGNC:7821]	1.17577
C2orf69	chromosome 2 open reading frame 69 [Source:HGNC Symbol;Acc:HGNC:26799]	1.17558
RNF141	ring finger protein 141 [Source:HGNC Symbol;Acc:HGNC:21159]	1.17538
SFXN4	sideroflexin 4 [Source:HGNC Symbol;Acc:HGNC:16088]	1.17495
CKLF	chemokine like factor [Source:HGNC Symbol;Acc:HGNC:13253]	1.17487
ARHGAP15	Rho GTPase activating protein 15 [Source:HGNC Symbol;Acc:HGNC:21030]	1.17368
SNX13	sorting nexin 13 [Source:HGNC Symbol;Acc:HGNC:21335]	1.17184
RPS3A	ribosomal protein S3A [Source:HGNC Symbol;Acc:HGNC:10421]	1.17098
FAM234A	family with sequence similarity 234 member A [Source:HGNC Symbol;Acc:HGNC:14163]	1.16974
RLF	RLF zinc finger [Source:HGNC Symbol;Acc:HGNC:10025]	1.16883
CYB5D1	cytochrome b5 domain containing 1 [Source:HGNC Symbol;Acc:HGNC:26516]	1.16844
CMC1	C-X9-C motif containing 1 [Source:HGNC Symbol;Acc:HGNC:28783]	1.16812
BPHL	biphenyl hydrolase like [Source:HGNC Symbol;Acc:HGNC:1094]	1.16735
C4orf19	chromosome 4 open reading frame 19 [Source:HGNC Symbol;Acc:HGNC:25618]	1.16693
PANK3	pantothenate kinase 3 [Source:HGNC Symbol;Acc:HGNC:19365]	1.16663
CCDC126	coiled-coil domain containing 126 [Source:HGNC Symbol;Acc:HGNC:22398]	1.16592
CCDC152	coiled-coil domain containing 152 [Source:HGNC Symbol;Acc:HGNC:34438]	1.16587
ZNF239	zinc finger protein 239 [Source:HGNC Symbol;Acc:HGNC:13031]	1.16464
SLC33A1	solute carrier family 33 member 1 [Source:HGNC Symbol;Acc:HGNC:95]	1.16334
CCDC39	coiled-coil domain containing 39 [Source:HGNC Symbol;Acc:HGNC:25244]	1.16288
C11orf49	chromosome 11 open reading frame 49 [Source:HGNC Symbol;Acc:HGNC:28720]	1.16144
DAAM2	dishevelled associated activator of morphogenesis 2 [Source:HGNC Symbol;Acc:HGNC:18143]	1.16074
FIRRE	firre intergenic repeating RNA element [Source:HGNC Symbol;Acc:HGNC:49627]	1.15998
MCTP1	multiple C2 and transmembrane domain containing 1 [Source:HGNC Symbol;Acc:HGNC:26183]	1.15981
CHD7	chromodomain helicase DNA binding protein 7 [Source:HGNC Symbol;Acc:HGNC:20626]	1.1595
CCN5	cellular communication network factor 5 [Source:HGNC Symbol;Acc:HGNC:12770]	1.15946
CLEC1A	C-type lectin domain family 1 member A [Source:HGNC Symbol;Acc:HGNC:24355]	1.1592
MROH1	maestro heat like repeat family member 1 [Source:HGNC Symbol;Acc:HGNC:26958]	1.15865
LBR	lamin B receptor [Source:HGNC Symbol;Acc:HGNC:6518]	1.15855
GTF2IRD1	GTF2I repeat domain containing 1 [Source:HGNC Symbol;Acc:HGNC:4661]	1.15731
C2orf50	chromosome 2 open reading frame 50 [Source:HGNC Symbol;Acc:HGNC:26324]	1.15634
CDS2	CDP-diacylglycerol synthase 2 [Source:HGNC Symbol;Acc:HGNC:1801]	1.15514
PELI2	pellino E3 ubiquitin protein ligase family member 2 [Source:HGNC Symbol;Acc:HGNC:8828]	1.15508
TPP2	tripeptidyl peptidase 2 [Source:HGNC Symbol;Acc:HGNC:12016]	1.15447
RALGPS2	Ral GEF with PH domain and SH3 binding motif 2 [Source:HGNC Symbol;Acc:HGNC:30279]	1.15444
ATG2A	autophagy related 2A [Source:HGNC Symbol;Acc:HGNC:29028]	1.15388
FER1L5	fer-1 like family member 5 [Source:HGNC Symbol;Acc:HGNC:19044]	1.1537
PLA2G15	phospholipase A2 group XV [Source:HGNC Symbol;Acc:HGNC:17163]	1.15326
RFESD	Rieske Fe-S domain containing [Source:HGNC Symbol;Acc:HGNC:29587]	1.15242
FAR2	fatty acyl-CoA reductase 2 [Source:HGNC Symbol;Acc:HGNC:25531]	1.15153
SORCS2	sortilin related VPS10 domain containing receptor 2 [Source:HGNC Symbol;Acc:HGNC:16698]	1.15083
PEX5	peroxisomal biogenesis factor 5 [Source:HGNC Symbol;Acc:HGNC:9719]	1.15078
SDHAF3	succinate dehydrogenase complex assembly factor 3 [Source:HGNC Symbol;Acc:HGNC:21752]	1.15001
PARP16	poly(ADP-ribose) polymerase family member 16 [Source:HGNC Symbol;Acc:HGNC:26040]	1.14887
ADGB	androglobin [Source:HGNC Symbol;Acc:HGNC:21212]	1.14878
ZFP30	ZFP30 zinc finger protein [Source:HGNC Symbol;Acc:HGNC:29555]	1.14825
TMEM167A	transmembrane protein 167A [Source:HGNC Symbol;Acc:HGNC:28330]	1.14704
CDK5RAP3	CDK5 regulatory subunit associated protein 3 [Source:HGNC Symbol;Acc:HGNC:18673]	1.14669
NFS1	NFS1 cysteine desulfurase [Source:HGNC Symbol;Acc:HGNC:15910]	1.14571
RSPO2	R-spondin 2 [Source:HGNC Symbol;Acc:HGNC:28583]	1.14497
HCFC2	host cell factor C2 [Source:HGNC Symbol;Acc:HGNC:24972]	1.1446
RPS19	ribosomal protein S19 [Source:HGNC Symbol;Acc:HGNC:10402]	1.14335
EIF3M	eukaryotic translation initiation factor 3 subunit M [Source:HGNC Symbol;Acc:HGNC:24460]	1.14316
CFHR3	complement factor H related 3 [Source:HGNC Symbol;Acc:HGNC:16980]	1.14312
CNTF	ciliary neurotrophic factor [Source:HGNC Symbol;Acc:HGNC:2169]	1.14248
AVPR2	arginine vasopressin receptor 2 [Source:HGNC Symbol;Acc:HGNC:897]	1.14181
YOD1	YOD1 deubiquitinase [Source:HGNC Symbol;Acc:HGNC:25035]	1.14096
SHROOM1	shroom family member 1 [Source:HGNC Symbol;Acc:HGNC:24084]	1.14092
ASB1	ankyrin repeat and SOCS box containing 1 [Source:HGNC Symbol;Acc:HGNC:16011]	1.14083
RNF43	ring finger protein 43 [Source:HGNC Symbol;Acc:HGNC:18505]	1.14071
RASAL2	RAS protein activator like 2 [Source:HGNC Symbol;Acc:HGNC:9874]	1.14069
SLC18B1	solute carrier family 18 member B1 [Source:HGNC Symbol;Acc:HGNC:21573]	1.13814
FUT4	fucosyltransferase 4 [Source:HGNC Symbol;Acc:HGNC:4015]	1.13752
PACSIN2	protein kinase C and casein kinase substrate in neurons 2 [Source:HGNC Symbol;Acc:HGNC:8571]	1.13621
TMEM18	transmembrane protein 18 [Source:HGNC Symbol;Acc:HGNC:25257]	1.13484
MT-TC	mitochondrially encoded tRNA-Cys (UGU/C) [Source:HGNC Symbol;Acc:HGNC:7477]	1.13482
ZNF136	zinc finger protein 136 [Source:HGNC Symbol;Acc:HGNC:12920]	1.13433
DPH7	diphthamide biosynthesis 7 [Source:HGNC Symbol;Acc:HGNC:25199]	1.134
RAB26	RAB26, member RAS oncogene family [Source:HGNC Symbol;Acc:HGNC:14259]	1.13268
HBA2	hemoglobin subunit alpha 2 [Source:HGNC Symbol;Acc:HGNC:4824]	1.13268
LRP2BP	LRP2 binding protein [Source:HGNC Symbol;Acc:HGNC:25434]	1.1324
MDM1	Mdm1 nuclear protein [Source:HGNC Symbol;Acc:HGNC:29917]	1.13234
TECPR2	tectonin beta-propeller repeat containing 2 [Source:HGNC Symbol;Acc:HGNC:19957]	1.13232
MAP1LC3B	microtubule associated protein 1 light chain 3 beta [Source:HGNC Symbol;Acc:HGNC:13352]	1.13229
SDCBP2	syndecan binding protein 2 [Source:HGNC Symbol;Acc:HGNC:15756]	1.13212
TCN2	transcobalamin 2 [Source:HGNC Symbol;Acc:HGNC:11653]	1.13099
XK	X-linked Kx blood group [Source:HGNC Symbol;Acc:HGNC:12811]	1.12763
INTU	inturned planar cell polarity protein [Source:HGNC Symbol;Acc:HGNC:29239]	1.12697
TRIM46	tripartite motif containing 46 [Source:HGNC Symbol;Acc:HGNC:19019]	1.12587
INSL3	insulin like 3 [Source:HGNC Symbol;Acc:HGNC:6086]	1.12552
PKNOX1	PBX/knotted 1 homeobox 1 [Source:HGNC Symbol;Acc:HGNC:9022]	1.12539
DNAJC6	DnaJ heat shock protein family (Hsp40) member C6 [Source:HGNC Symbol;Acc:HGNC:15469]	1.12509
ICA1	islet cell autoantigen 1 [Source:HGNC Symbol;Acc:HGNC:5343]	1.12459
XRRA1	X-ray radiation resistance associated 1 [Source:HGNC Symbol;Acc:HGNC:18868]	1.12424
CYP2E1	cytochrome P450 family 2 subfamily E member 1 [Source:HGNC Symbol;Acc:HGNC:2631]	1.12417
KIAA1958	KIAA1958 [Source:HGNC Symbol;Acc:HGNC:23427]	1.12382
ITGA10	integrin subunit alpha 10 [Source:HGNC Symbol;Acc:HGNC:6135]	1.12346
FAM91A1	family with sequence similarity 91 member A1 [Source:HGNC Symbol;Acc:HGNC:26306]	1.12341
NPR1	natriuretic peptide receptor 1 [Source:HGNC Symbol;Acc:HGNC:7943]	1.12201
TMEM64	transmembrane protein 64 [Source:HGNC Symbol;Acc:HGNC:25441]	1.12065
AP3S1	adaptor related protein complex 3 subunit sigma 1 [Source:HGNC Symbol;Acc:HGNC:2013]	1.11987
TARBP1	TAR (HIV-1) RNA binding protein 1 [Source:HGNC Symbol;Acc:HGNC:11568]	1.11939
BET1	Bet1 golgi vesicular membrane trafficking protein [Source:HGNC Symbol;Acc:HGNC:14562]	1.1181
PICALM	phosphatidylinositol binding clathrin assembly protein [Source:HGNC Symbol;Acc:HGNC:15514]	1.118
OSBPL2	oxysterol binding protein like 2 [Source:HGNC Symbol;Acc:HGNC:15761]	1.1176
FAM234B	family with sequence similarity 234 member B [Source:HGNC Symbol;Acc:HGNC:29288]	1.11743
FBXL4	F-box and leucine rich repeat protein 4 [Source:HGNC Symbol;Acc:HGNC:13601]	1.11698
KRTCAP3	keratinocyte associated protein 3 [Source:HGNC Symbol;Acc:HGNC:28943]	1.11674
EIF4EBP1	eukaryotic translation initiation factor 4E binding protein 1 [Source:HGNC Symbol;Acc:HGNC:3288]	1.11669
NAPRT	nicotinate phosphoribosyltransferase [Source:HGNC Symbol;Acc:HGNC:30450]	1.11631
KCTD2	potassium channel tetramerization domain containing 2 [Source:HGNC Symbol;Acc:HGNC:21294]	1.11486
APLP1	amyloid beta precursor like protein 1 [Source:HGNC Symbol;Acc:HGNC:597]	1.1147
RHBDL1	rhomboid like 1 [Source:HGNC Symbol;Acc:HGNC:10007]	1.11448
CHSY1	chondroitin sulfate synthase 1 [Source:HGNC Symbol;Acc:HGNC:17198]	1.11375
EIF3E	eukaryotic translation initiation factor 3 subunit E [Source:HGNC Symbol;Acc:HGNC:3277]	1.11286
DCLK3	doublecortin like kinase 3 [Source:HGNC Symbol;Acc:HGNC:19005]	1.1121
METTL9	methyltransferase like 9 [Source:HGNC Symbol;Acc:HGNC:24586]	1.11116
UHMK1	U2AF homology motif kinase 1 [Source:HGNC Symbol;Acc:HGNC:19683]	1.11064
ALDH18A1	aldehyde dehydrogenase 18 family member A1 [Source:HGNC Symbol;Acc:HGNC:9722]	1.10975
SARS1	seryl-tRNA synthetase 1 [Source:HGNC Symbol;Acc:HGNC:10537]	1.10878
TTC30A	tetratricopeptide repeat domain 30A [Source:HGNC Symbol;Acc:HGNC:25853]	1.1087
OSM	oncostatin M [Source:HGNC Symbol;Acc:HGNC:8506]	1.10837
RAB18	RAB18, member RAS oncogene family [Source:HGNC Symbol;Acc:HGNC:14244]	1.10834
CTSV	cathepsin V [Source:HGNC Symbol;Acc:HGNC:2538]	1.1082
NPHP4	nephrocystin 4 [Source:HGNC Symbol;Acc:HGNC:19104]	1.10679
GK5	glycerol kinase 5 [Source:HGNC Symbol;Acc:HGNC:28635]	1.1064
CPNE3	copine 3 [Source:HGNC Symbol;Acc:HGNC:2316]	1.10506
NECAP2	NECAP endocytosis associated 2 [Source:HGNC Symbol;Acc:HGNC:25528]	1.10473
HDAC11	histone deacetylase 11 [Source:HGNC Symbol;Acc:HGNC:19086]	1.10406
FAM122B	family with sequence similarity 122B [Source:HGNC Symbol;Acc:HGNC:30490]	1.10392
SCN3B	sodium voltage-gated channel beta subunit 3 [Source:HGNC Symbol;Acc:HGNC:20665]	1.10382
SEPTIN8	septin 8 [Source:HGNC Symbol;Acc:HGNC:16511]	1.1036
TMC4	transmembrane channel like 4 [Source:HGNC Symbol;Acc:HGNC:22998]	1.10327
NMRK1	nicotinamide riboside kinase 1 [Source:HGNC Symbol;Acc:HGNC:26057]	1.10309
SMPD5	sphingomyelin phosphodiesterase 5 (pseudogene) [Source:HGNC Symbol;Acc:HGNC:52275]	1.10257
PTPDC1	protein tyrosine phosphatase domain containing 1 [Source:HGNC Symbol;Acc:HGNC:30184]	1.10253
OSGEPL1	O-sialoglycoprotein endopeptidase like 1 [Source:HGNC Symbol;Acc:HGNC:23075]	1.10223
PROS1	protein S [Source:HGNC Symbol;Acc:HGNC:9456]	1.10166
PCP2	Purkinje cell protein 2 [Source:HGNC Symbol;Acc:HGNC:30209]	1.10154
HAL	histidine ammonia-lyase [Source:HGNC Symbol;Acc:HGNC:4806]	1.10111
FOXQ1	forkhead box Q1 [Source:HGNC Symbol;Acc:HGNC:20951]	1.10088
GPR150	G protein-coupled receptor 150 [Source:HGNC Symbol;Acc:HGNC:23628]	1.10026
SOX12	SRY-box transcription factor 12 [Source:HGNC Symbol;Acc:HGNC:11198]	1.10008
UPRT	uracil phosphoribosyltransferase homolog [Source:HGNC Symbol;Acc:HGNC:28334]	1.09852
TCEANC	transcription elongation factor A N-terminal and central domain containing [Source:HGNC Symbol;Acc:HGNC:28277]	1.09811
MXI1	MAX interactor 1, dimerization protein [Source:HGNC Symbol;Acc:HGNC:7534]	1.09742
PLCB2	phospholipase C beta 2 [Source:HGNC Symbol;Acc:HGNC:9055]	1.09654
LAMP1	lysosomal associated membrane protein 1 [Source:HGNC Symbol;Acc:HGNC:6499]	1.09626
COL9A3	collagen type IX alpha 3 chain [Source:HGNC Symbol;Acc:HGNC:2219]	1.09539
PCCA	propionyl-CoA carboxylase subunit alpha [Source:HGNC Symbol;Acc:HGNC:8653]	1.0951
SULT2B1	sulfotransferase family 2B member 1 [Source:HGNC Symbol;Acc:HGNC:11459]	1.09428
NXF2B	nuclear RNA export factor 2B [Source:HGNC Symbol;Acc:HGNC:23984]	1.09426
SLC1A4	solute carrier family 1 member 4 [Source:HGNC Symbol;Acc:HGNC:10942]	1.09352
CCDC117	coiled-coil domain containing 117 [Source:HGNC Symbol;Acc:HGNC:26599]	1.09323
PFKM	phosphofructokinase, muscle [Source:HGNC Symbol;Acc:HGNC:8877]	1.09292
SMPDL3A	sphingomyelin phosphodiesterase acid like 3A [Source:HGNC Symbol;Acc:HGNC:17389]	1.09269
NANOS3	nanos C2HC-type zinc finger 3 [Source:HGNC Symbol;Acc:HGNC:22048]	1.09248
SORD	sorbitol dehydrogenase [Source:HGNC Symbol;Acc:HGNC:11184]	1.09245
HIF1A	hypoxia inducible factor 1 subunit alpha [Source:HGNC Symbol;Acc:HGNC:4910]	1.0921
NUDT4	nudix hydrolase 4 [Source:HGNC Symbol;Acc:HGNC:8051]	1.09175
ZNF516	zinc finger protein 516 [Source:HGNC Symbol;Acc:HGNC:28990]	1.09133
SELENOT	selenoprotein T [Source:HGNC Symbol;Acc:HGNC:18136]	1.09087
DYNLL2	dynein light chain LC8-type 2 [Source:HGNC Symbol;Acc:HGNC:24596]	1.0903
HORMAD2	HORMA domain containing 2 [Source:HGNC Symbol;Acc:HGNC:28383]	1.08971
NEK1	NIMA related kinase 1 [Source:HGNC Symbol;Acc:HGNC:7744]	1.08954
HEXD	hexosaminidase D [Source:HGNC Symbol;Acc:HGNC:26307]	1.08944
KCTD12	potassium channel tetramerization domain containing 12 [Source:HGNC Symbol;Acc:HGNC:14678]	1.08848
RAB6B	RAB6B, member RAS oncogene family [Source:HGNC Symbol;Acc:HGNC:14902]	1.08765
NEAT1	nuclear paraspeckle assembly transcript 1 [Source:HGNC Symbol;Acc:HGNC:30815]	1.08683
DHRS7	dehydrogenase/reductase 7 [Source:HGNC Symbol;Acc:HGNC:21524]	1.08662
PXYLP1	2-phosphoxylose phosphatase 1 [Source:HGNC Symbol;Acc:HGNC:26303]	1.08593
DLX2	distal-less homeobox 2 [Source:HGNC Symbol;Acc:HGNC:2915]	1.0856
GMDS	GDP-mannose 4,6-dehydratase [Source:HGNC Symbol;Acc:HGNC:4369]	1.0855
DNAJB9	DnaJ heat shock protein family (Hsp40) member B9 [Source:HGNC Symbol;Acc:HGNC:6968]	1.08446
SMIM13	small integral membrane protein 13 [Source:HGNC Symbol;Acc:HGNC:27356]	1.08366
PSAP	prosaposin [Source:HGNC Symbol;Acc:HGNC:9498]	1.08251
LRP5	LDL receptor related protein 5 [Source:HGNC Symbol;Acc:HGNC:6697]	1.08227
ACAD11	acyl-CoA dehydrogenase family member 11 [Source:HGNC Symbol;Acc:HGNC:30211]	1.08102
NGRN	neugrin, neurite outgrowth associated [Source:HGNC Symbol;Acc:HGNC:18077]	1.07859
ATP13A3	ATPase 13A3 [Source:HGNC Symbol;Acc:HGNC:24113]	1.07851
C1R	complement C1r [Source:HGNC Symbol;Acc:HGNC:1246]	1.07847
FAM131A	family with sequence similarity 131 member A [Source:HGNC Symbol;Acc:HGNC:28308]	1.0765
RELCH	RAB11 binding and LisH domain, coiled-coil and HEAT repeat containing [Source:HGNC Symbol;Acc:HGNC:29289]	1.07578
C16orf96	chromosome 16 open reading frame 96 [Source:HGNC Symbol;Acc:HGNC:40031]	1.07574
KIF9	kinesin family member 9 [Source:HGNC Symbol;Acc:HGNC:16666]	1.07537
RPL37A	ribosomal protein L37a [Source:HGNC Symbol;Acc:HGNC:10348]	1.07478
GORASP1	golgi reassembly stacking protein 1 [Source:HGNC Symbol;Acc:HGNC:16769]	1.074
NOTCH3	notch receptor 3 [Source:HGNC Symbol;Acc:HGNC:7883]	1.07327
ADGRF4	adhesion G protein-coupled receptor F4 [Source:HGNC Symbol;Acc:HGNC:19011]	1.07246
AASDHPPT	aminoadipate-semialdehyde dehydrogenase-phosphopantetheinyl transferase [Source:HGNC Symbol;Acc:HGNC:14235]	1.07245
TRAF6	TNF receptor associated factor 6 [Source:HGNC Symbol;Acc:HGNC:12036]	1.07176
SLC45A4	solute carrier family 45 member 4 [Source:HGNC Symbol;Acc:HGNC:29196]	1.07029
C1QTNF6	C1q and TNF related 6 [Source:HGNC Symbol;Acc:HGNC:14343]	1.06898
RPL36A	ribosomal protein L36a [Source:HGNC Symbol;Acc:HGNC:10359]	1.06844
EXOC3L2	exocyst complex component 3 like 2 [Source:HGNC Symbol;Acc:HGNC:30162]	1.06817
NUBPL	nucleotide binding protein like [Source:HGNC Symbol;Acc:HGNC:20278]	1.06809
PPP2CB	protein phosphatase 2 catalytic subunit beta [Source:HGNC Symbol;Acc:HGNC:9300]	1.06793
LY6G6D	lymphocyte antigen 6 family member G6D [Source:HGNC Symbol;Acc:HGNC:13935]	1.06742
MYCBP2	MYC binding protein 2 [Source:HGNC Symbol;Acc:HGNC:23386]	1.06716
EMB	embigin [Source:HGNC Symbol;Acc:HGNC:30465]	1.06695
CATSPERG	cation channel sperm associated auxiliary subunit gamma [Source:HGNC Symbol;Acc:HGNC:25243]	1.06648
PAIP2B	poly(A) binding protein interacting protein 2B [Source:HGNC Symbol;Acc:HGNC:29200]	1.06638
SH3GL1	SH3 domain containing GRB2 like 1, endophilin A2 [Source:HGNC Symbol;Acc:HGNC:10830]	1.06635
PRPS2	phosphoribosyl pyrophosphate synthetase 2 [Source:HGNC Symbol;Acc:HGNC:9465]	1.06421
MRC1	mannose receptor C-type 1 [Source:HGNC Symbol;Acc:HGNC:7228]	1.06342
PLXNA4	plexin A4 [Source:HGNC Symbol;Acc:HGNC:9102]	1.06289
CEP85L	centrosomal protein 85 like [Source:HGNC Symbol;Acc:HGNC:21638]	1.06287
SYT3	synaptotagmin 3 [Source:HGNC Symbol;Acc:HGNC:11511]	1.0628
RCAN3	RCAN family member 3 [Source:HGNC Symbol;Acc:HGNC:3042]	1.0628
RPS6KL1	ribosomal protein S6 kinase like 1 [Source:HGNC Symbol;Acc:HGNC:20222]	1.0627
RPS11	ribosomal protein S11 [Source:HGNC Symbol;Acc:HGNC:10384]	1.06252
MOSPD2	motile sperm domain containing 2 [Source:HGNC Symbol;Acc:HGNC:28381]	1.06209
C4orf48	chromosome 4 open reading frame 48 [Source:HGNC Symbol;Acc:HGNC:34437]	1.06177
CMTM4	CKLF like MARVEL transmembrane domain containing 4 [Source:HGNC Symbol;Acc:HGNC:19175]	1.06173
KLHL22	kelch like family member 22 [Source:HGNC Symbol;Acc:HGNC:25888]	1.0613
TF	transferrin [Source:HGNC Symbol;Acc:HGNC:11740]	1.06087
FBH1	F-box DNA helicase 1 [Source:HGNC Symbol;Acc:HGNC:13620]	1.06044
CASTOR2	cytosolic arginine sensor for mTORC1 subunit 2 [Source:HGNC Symbol;Acc:HGNC:37073]	1.06012
C9orf24	chromosome 9 open reading frame 24 [Source:HGNC Symbol;Acc:HGNC:19919]	1.05987
CIRBP	cold inducible RNA binding protein [Source:HGNC Symbol;Acc:HGNC:1982]	1.05933
SCP2	sterol carrier protein 2 [Source:HGNC Symbol;Acc:HGNC:10606]	1.05933
SC5D	sterol-C5-desaturase [Source:HGNC Symbol;Acc:HGNC:10547]	1.05811
RAP2C	RAP2C, member of RAS oncogene family [Source:HGNC Symbol;Acc:HGNC:21165]	1.05768
WDCP	WD repeat and coiled coil containing [Source:HGNC Symbol;Acc:HGNC:26157]	1.0576
DDB2	damage specific DNA binding protein 2 [Source:HGNC Symbol;Acc:HGNC:2718]	1.05706
ABHD14B	abhydrolase domain containing 14B [Source:HGNC Symbol;Acc:HGNC:28235]	1.05703
LRFN3	leucine rich repeat and fibronectin type III domain containing 3 [Source:HGNC Symbol;Acc:HGNC:28370]	1.05695
CLU	clusterin [Source:HGNC Symbol;Acc:HGNC:2095]	1.05679
WDR25	WD repeat domain 25 [Source:HGNC Symbol;Acc:HGNC:21064]	1.05656
GP1BA	glycoprotein Ib platelet subunit alpha [Source:HGNC Symbol;Acc:HGNC:4439]	1.0563
RASGRP4	RAS guanyl releasing protein 4 [Source:HGNC Symbol;Acc:HGNC:18958]	1.05528
EHD1	EH domain containing 1 [Source:HGNC Symbol;Acc:HGNC:3242]	1.05511
ARHGAP44	Rho GTPase activating protein 44 [Source:HGNC Symbol;Acc:HGNC:29096]	1.05436
TMEM47	transmembrane protein 47 [Source:HGNC Symbol;Acc:HGNC:18515]	1.05414
HEMK1	HemK methyltransferase family member 1 [Source:HGNC Symbol;Acc:HGNC:24923]	1.05361
NEK9	NIMA related kinase 9 [Source:HGNC Symbol;Acc:HGNC:18591]	1.05295
UBE2G1	ubiquitin conjugating enzyme E2 G1 [Source:HGNC Symbol;Acc:HGNC:12482]	1.05293
RCBTB2	RCC1 and BTB domain containing protein 2 [Source:HGNC Symbol;Acc:HGNC:1914]	1.05283
PPP1R35	protein phosphatase 1 regulatory subunit 35 [Source:HGNC Symbol;Acc:HGNC:28320]	1.05204
LCORL	ligand dependent nuclear receptor corepressor like [Source:HGNC Symbol;Acc:HGNC:30776]	1.05168
CORO2A	coronin 2A [Source:HGNC Symbol;Acc:HGNC:2255]	1.05117
H1-0	H1.0 linker histone [Source:HGNC Symbol;Acc:HGNC:4714]	1.05101
DDX50	DExD-box helicase 50 [Source:HGNC Symbol;Acc:HGNC:17906]	1.04983
DOP1A	DOP1 leucine zipper like protein A [Source:HGNC Symbol;Acc:HGNC:21194]	1.04822
SLIT1	slit guidance ligand 1 [Source:HGNC Symbol;Acc:HGNC:11085]	1.04708
MCTS1	MCTS1 re-initiation and release factor [Source:HGNC Symbol;Acc:HGNC:23357]	1.04642
ACY1	aminoacylase 1 [Source:HGNC Symbol;Acc:HGNC:177]	1.04635
GSTK1	glutathione S-transferase kappa 1 [Source:HGNC Symbol;Acc:HGNC:16906]	1.04621
AP4E1	adaptor related protein complex 4 subunit epsilon 1 [Source:HGNC Symbol;Acc:HGNC:573]	1.04538
ADORA3	adenosine A3 receptor [Source:HGNC Symbol;Acc:HGNC:268]	1.04529
KIF13B	kinesin family member 13B [Source:HGNC Symbol;Acc:HGNC:14405]	1.04468
HS3ST6	heparan sulfate-glucosamine 3-sulfotransferase 6 [Source:HGNC Symbol;Acc:HGNC:14178]	1.04435
EVI5	ecotropic viral integration site 5 [Source:HGNC Symbol;Acc:HGNC:3501]	1.04429
MEG8	maternally expressed 8, small nucleolar RNA host gene [Source:HGNC Symbol;Acc:HGNC:14574]	1.04346
PLOD1	procollagen-lysine,2-oxoglutarate 5-dioxygenase 1 [Source:HGNC Symbol;Acc:HGNC:9081]	1.0432
R3HDM4	R3H domain containing 4 [Source:HGNC Symbol;Acc:HGNC:28270]	1.04306
TNKS1BP1	tankyrase 1 binding protein 1 [Source:HGNC Symbol;Acc:HGNC:19081]	1.04194
MT-TS1	mitochondrially encoded tRNA-Ser (UCN) 1 [Source:HGNC Symbol;Acc:HGNC:7497]	1.04131
INAFM2	InaF motif containing 2 [Source:HGNC Symbol;Acc:HGNC:35165]	1.04042
IL16	interleukin 16 [Source:HGNC Symbol;Acc:HGNC:5980]	1.03994
GPC2	glypican 2 [Source:HGNC Symbol;Acc:HGNC:4450]	1.03912
CREG2	cellular repressor of E1A stimulated genes 2 [Source:HGNC Symbol;Acc:HGNC:14272]	1.03883
OPN3	opsin 3 [Source:HGNC Symbol;Acc:HGNC:14007]	1.03786
ARHGAP29	Rho GTPase activating protein 29 [Source:HGNC Symbol;Acc:HGNC:30207]	1.03702
DENND4A	DENN domain containing 4A [Source:HGNC Symbol;Acc:HGNC:24321]	1.03641
RNF130	ring finger protein 130 [Source:HGNC Symbol;Acc:HGNC:18280]	1.03613
COLEC11	collectin subfamily member 11 [Source:HGNC Symbol;Acc:HGNC:17213]	1.03583
FNDC3B	fibronectin type III domain containing 3B [Source:HGNC Symbol;Acc:HGNC:24670]	1.03548
OSMR	oncostatin M receptor [Source:HGNC Symbol;Acc:HGNC:8507]	1.03436
PCK2	phosphoenolpyruvate carboxykinase 2, mitochondrial [Source:HGNC Symbol;Acc:HGNC:8725]	1.03426
DENND2C	DENN domain containing 2C [Source:HGNC Symbol;Acc:HGNC:24748]	1.03419
VPS8	VPS8 subunit of CORVET complex [Source:HGNC Symbol;Acc:HGNC:29122]	1.03314
RASSF7	Ras association domain family member 7 [Source:HGNC Symbol;Acc:HGNC:1166]	1.03296
CLP1	cleavage factor polyribonucleotide kinase subunit 1 [Source:HGNC Symbol;Acc:HGNC:16999]	1.03284
ATP8B2	ATPase phospholipid transporting 8B2 [Source:HGNC Symbol;Acc:HGNC:13534]	1.03274
CROCC	ciliary rootlet coiled-coil, rootletin [Source:HGNC Symbol;Acc:HGNC:21299]	1.0325
CRADD	CASP2 and RIPK1 domain containing adaptor with death domain [Source:HGNC Symbol;Acc:HGNC:2340]	1.03233
MT1X	metallothionein 1X [Source:HGNC Symbol;Acc:HGNC:7405]	1.02985
TRIM23	tripartite motif containing 23 [Source:HGNC Symbol;Acc:HGNC:660]	1.029
ZFP41	ZFP41 zinc finger protein [Source:HGNC Symbol;Acc:HGNC:26786]	1.02851
SDHAF2	succinate dehydrogenase complex assembly factor 2 [Source:HGNC Symbol;Acc:HGNC:26034]	1.02838
ETHE1	ETHE1 persulfide dioxygenase [Source:HGNC Symbol;Acc:HGNC:23287]	1.02826
MID2	midline 2 [Source:HGNC Symbol;Acc:HGNC:7096]	1.02759
PLS3	plastin 3 [Source:HGNC Symbol;Acc:HGNC:9091]	1.02746
AP2S1	adaptor related protein complex 2 subunit sigma 1 [Source:HGNC Symbol;Acc:HGNC:565]	1.02734
ZNF597	zinc finger protein 597 [Source:HGNC Symbol;Acc:HGNC:26573]	1.02673
UAP1	UDP-N-acetylglucosamine pyrophosphorylase 1 [Source:HGNC Symbol;Acc:HGNC:12457]	1.02587
AMMECR1L	AMMECR1 like [Source:HGNC Symbol;Acc:HGNC:28658]	1.0257
AMIGO1	adhesion molecule with Ig like domain 1 [Source:HGNC Symbol;Acc:HGNC:20824]	1.02557
ARMCX4	armadillo repeat containing X-linked 4 [Source:HGNC Symbol;Acc:HGNC:28615]	1.02518
RSPRY1	ring finger and SPRY domain containing 1 [Source:HGNC Symbol;Acc:HGNC:29420]	1.02473
C1orf198	chromosome 1 open reading frame 198 [Source:HGNC Symbol;Acc:HGNC:25900]	1.0239
COMMD6	COMM domain containing 6 [Source:HGNC Symbol;Acc:HGNC:24015]	1.02386
RND2	Rho family GTPase 2 [Source:HGNC Symbol;Acc:HGNC:18315]	1.02356
SLC18A2	solute carrier family 18 member A2 [Source:HGNC Symbol;Acc:HGNC:10935]	1.02312
ADCY5	adenylate cyclase 5 [Source:HGNC Symbol;Acc:HGNC:236]	1.023
MTUS2	microtubule associated scaffold protein 2 [Source:HGNC Symbol;Acc:HGNC:20595]	1.02252
RPS16	ribosomal protein S16 [Source:HGNC Symbol;Acc:HGNC:10396]	1.02198
C5orf63	chromosome 5 open reading frame 63 [Source:HGNC Symbol;Acc:HGNC:40051]	1.0216
LSP1	lymphocyte specific protein 1 [Source:HGNC Symbol;Acc:HGNC:6707]	1.02157
UGGT2	UDP-glucose glycoprotein glucosyltransferase 2 [Source:HGNC Symbol;Acc:HGNC:15664]	1.02054
RAD9B	RAD9 checkpoint clamp component B [Source:HGNC Symbol;Acc:HGNC:21700]	1.01955
RPS27A	ribosomal protein S27a [Source:HGNC Symbol;Acc:HGNC:10417]	1.01908
RPL22L1	ribosomal protein L22 like 1 [Source:HGNC Symbol;Acc:HGNC:27610]	1.01745
IBTK	inhibitor of Bruton tyrosine kinase [Source:HGNC Symbol;Acc:HGNC:17853]	1.0173
PTGER4	prostaglandin E receptor 4 [Source:HGNC Symbol;Acc:HGNC:9596]	1.01709
RPS8	ribosomal protein S8 [Source:HGNC Symbol;Acc:HGNC:10441]	1.01664
RDH5	retinol dehydrogenase 5 [Source:HGNC Symbol;Acc:HGNC:9940]	1.01593
ST8SIA4	ST8 alpha-N-acetyl-neuraminide alpha-2,8-sialyltransferase 4 [Source:HGNC Symbol;Acc:HGNC:10871]	1.01493
CD5L	CD5 molecule like [Source:HGNC Symbol;Acc:HGNC:1690]	1.01406
FAU	FAU ubiquitin like and ribosomal protein S30 fusion [Source:HGNC Symbol;Acc:HGNC:3597]	1.01405
HOGA1	4-hydroxy-2-oxoglutarate aldolase 1 [Source:HGNC Symbol;Acc:HGNC:25155]	1.01368
RUSC1	RUN and SH3 domain containing 1 [Source:HGNC Symbol;Acc:HGNC:17153]	1.01329
DPM3	dolichyl-phosphate mannosyltransferase subunit 3, regulatory [Source:HGNC Symbol;Acc:HGNC:3007]	1.01305
ST7	suppression of tumorigenicity 7 [Source:HGNC Symbol;Acc:HGNC:11351]	1.01301
ARHGEF5	Rho guanine nucleotide exchange factor 5 [Source:HGNC Symbol;Acc:HGNC:13209]	1.01277
NUDT21	nudix hydrolase 21 [Source:HGNC Symbol;Acc:HGNC:13870]	1.01268
ABCA8	ATP binding cassette subfamily A member 8 [Source:HGNC Symbol;Acc:HGNC:38]	1.01215
GPC3	glypican 3 [Source:HGNC Symbol;Acc:HGNC:4451]	1.01198
THBD	thrombomodulin [Source:HGNC Symbol;Acc:HGNC:11784]	1.01191
KANK3	KN motif and ankyrin repeat domains 3 [Source:HGNC Symbol;Acc:HGNC:24796]	1.00984
ZNF397	zinc finger protein 397 [Source:HGNC Symbol;Acc:HGNC:18818]	1.00966
TNFSF9	TNF superfamily member 9 [Source:HGNC Symbol;Acc:HGNC:11939]	1.00785
OAZ1	ornithine decarboxylase antizyme 1 [Source:HGNC Symbol;Acc:HGNC:8095]	1.00731
IKBIP	IKBKB interacting protein [Source:HGNC Symbol;Acc:HGNC:26430]	1.00707
XXYLT1	xyloside xylosyltransferase 1 [Source:HGNC Symbol;Acc:HGNC:26639]	1.00685
HSPB11	heat shock protein family B (small) member 11 [Source:HGNC Symbol;Acc:HGNC:25019]	1.00631
IFITM5	interferon induced transmembrane protein 5 [Source:HGNC Symbol;Acc:HGNC:16644]	1.00621
NCBP3	nuclear cap binding subunit 3 [Source:HGNC Symbol;Acc:HGNC:24612]	1.00602
ICE2	interactor of little elongation complex ELL subunit 2 [Source:HGNC Symbol;Acc:HGNC:29885]	1.00496
TOP2B	DNA topoisomerase II beta [Source:HGNC Symbol;Acc:HGNC:11990]	1.00478
RIPOR2	RHO family interacting cell polarization regulator 2 [Source:HGNC Symbol;Acc:HGNC:13872]	1.00462
DMXL2	Dmx like 2 [Source:HGNC Symbol;Acc:HGNC:2938]	1.00451
DERL1	derlin 1 [Source:HGNC Symbol;Acc:HGNC:28454]	1.00435
RPS14	ribosomal protein S14 [Source:HGNC Symbol;Acc:HGNC:10387]	1.00409
COPZ2	COPI coat complex subunit zeta 2 [Source:HGNC Symbol;Acc:HGNC:19356]	1.00384
MSI2	musashi RNA binding protein 2 [Source:HGNC Symbol;Acc:HGNC:18585]	1.00307
RHBDD1	rhomboid domain containing 1 [Source:HGNC Symbol;Acc:HGNC:23081]	1.00298
ENTPD4	ectonucleoside triphosphate diphosphohydrolase 4 [Source:HGNC Symbol;Acc:HGNC:14573]	1.00217
MORN3	MORN repeat containing 3 [Source:HGNC Symbol;Acc:HGNC:29807]	1.00156
ARAP2	ArfGAP with RhoGAP domain, ankyrin repeat and PH domain 2 [Source:HGNC Symbol;Acc:HGNC:16924]	1.0014
METTL23	methyltransferase like 23 [Source:HGNC Symbol;Acc:HGNC:26988]	1.00105
DIP2A	disco interacting protein 2 homolog A [Source:HGNC Symbol;Acc:HGNC:17217]	1.00079
EVC2	EvC ciliary complex subunit 2 [Source:HGNC Symbol;Acc:HGNC:19747]	1
MIR147B	microRNA 147b [Source:HGNC Symbol;Acc:HGNC:33655]	0.999865
C8orf58	chromosome 8 open reading frame 58 [Source:HGNC Symbol;Acc:HGNC:32233]	0.999619
SLC25A42	solute carrier family 25 member 42 [Source:HGNC Symbol;Acc:HGNC:28380]	0.9989
CTSH	cathepsin H [Source:HGNC Symbol;Acc:HGNC:2535]	0.997767
TCTA	T cell leukemia translocation altered [Source:HGNC Symbol;Acc:HGNC:11692]	0.997657
C11orf54	chromosome 11 open reading frame 54 [Source:HGNC Symbol;Acc:HGNC:30204]	0.997042
GSTO2	glutathione S-transferase omega 2 [Source:HGNC Symbol;Acc:HGNC:23064]	0.99704
TSEN34	tRNA splicing endonuclease subunit 34 [Source:HGNC Symbol;Acc:HGNC:15506]	0.996841
MSANTD4	Myb/SANT DNA binding domain containing 4 with coiled-coils [Source:HGNC Symbol;Acc:HGNC:29383]	0.996796
GTF2E2	general transcription factor IIE subunit 2 [Source:HGNC Symbol;Acc:HGNC:4651]	0.996215
SLC39A9	solute carrier family 39 member 9 [Source:HGNC Symbol;Acc:HGNC:20182]	0.995282
NAA40	N-alpha-acetyltransferase 40, NatD catalytic subunit [Source:HGNC Symbol;Acc:HGNC:25845]	0.994999
PAOX	polyamine oxidase [Source:HGNC Symbol;Acc:HGNC:20837]	0.994722
CCT6B	chaperonin containing TCP1 subunit 6B [Source:HGNC Symbol;Acc:HGNC:1621]	0.994615
ACER2	alkaline ceramidase 2 [Source:HGNC Symbol;Acc:HGNC:23675]	0.994133
TRIM6	tripartite motif containing 6 [Source:HGNC Symbol;Acc:HGNC:16277]	0.992916
GNG14	G protein subunit gamma 14 [Source:HGNC Symbol;Acc:HGNC:53439]	0.992379
VAMP3	vesicle associated membrane protein 3 [Source:HGNC Symbol;Acc:HGNC:12644]	0.991961
ID1	inhibitor of DNA binding 1, HLH protein [Source:HGNC Symbol;Acc:HGNC:5360]	0.991333
FAM117B	family with sequence similarity 117 member B [Source:HGNC Symbol;Acc:HGNC:14440]	0.990653
EIF4EBP3	eukaryotic translation initiation factor 4E binding protein 3 [Source:HGNC Symbol;Acc:HGNC:3290]	0.990613
INSIG2	insulin induced gene 2 [Source:HGNC Symbol;Acc:HGNC:20452]	0.990294
ZFR2	zinc finger RNA binding protein 2 [Source:HGNC Symbol;Acc:HGNC:29189]	0.990104
MAP3K1	mitogen-activated protein kinase kinase kinase 1 [Source:HGNC Symbol;Acc:HGNC:6848]	0.98942
CADM4	cell adhesion molecule 4 [Source:HGNC Symbol;Acc:HGNC:30825]	0.989387
RAB39A	RAB39A, member RAS oncogene family [Source:HGNC Symbol;Acc:HGNC:16521]	0.989381
THA1P	threonine aldolase 1, pseudogene [Source:HGNC Symbol;Acc:HGNC:18004]	0.989334
HIC2	HIC ZBTB transcriptional repressor 2 [Source:HGNC Symbol;Acc:HGNC:18595]	0.989223
RASGRF2	Ras protein specific guanine nucleotide releasing factor 2 [Source:HGNC Symbol;Acc:HGNC:9876]	0.988883
NCKAP5L	NCK associated protein 5 like [Source:HGNC Symbol;Acc:HGNC:29321]	0.988804
C20orf173	chromosome 20 open reading frame 173 [Source:HGNC Symbol;Acc:HGNC:16166]	0.988651
FAM210B	family with sequence similarity 210 member B [Source:HGNC Symbol;Acc:HGNC:16102]	0.987912
MKRN2OS	MKRN2 opposite strand [Source:HGNC Symbol;Acc:HGNC:40375]	0.987799
ELMOD3	ELMO domain containing 3 [Source:HGNC Symbol;Acc:HGNC:26158]	0.986702
SMIM27	small integral membrane protein 27 [Source:HGNC Symbol;Acc:HGNC:31420]	0.986367
BEX3	brain expressed X-linked 3 [Source:HGNC Symbol;Acc:HGNC:13388]	0.986129
NAPB	NSF attachment protein beta [Source:HGNC Symbol;Acc:HGNC:15751]	0.985915
AHDC1	AT-hook DNA binding motif containing 1 [Source:HGNC Symbol;Acc:HGNC:25230]	0.985679
EEPD1	endonuclease/exonuclease/phosphatase family domain containing 1 [Source:HGNC Symbol;Acc:HGNC:22223]	0.98542
TBC1D12	TBC1 domain family member 12 [Source:HGNC Symbol;Acc:HGNC:29082]	0.985095
STRADB	STE20 related adaptor beta [Source:HGNC Symbol;Acc:HGNC:13205]	0.984701
ZC3H6	zinc finger CCCH-type containing 6 [Source:HGNC Symbol;Acc:HGNC:24762]	0.984454
C11orf96	chromosome 11 open reading frame 96 [Source:HGNC Symbol;Acc:HGNC:38675]	0.983702
MS4A1	membrane spanning 4-domains A1 [Source:HGNC Symbol;Acc:HGNC:7315]	0.981023
COX6A2	cytochrome c oxidase subunit 6A2 [Source:HGNC Symbol;Acc:HGNC:2279]	0.980689
MINAR1	membrane integral NOTCH2 associated receptor 1 [Source:HGNC Symbol;Acc:HGNC:29172]	0.980291
GATD1	glutamine amidotransferase like class 1 domain containing 1 [Source:HGNC Symbol;Acc:HGNC:26616]	0.980248
EIF3F	eukaryotic translation initiation factor 3 subunit F [Source:HGNC Symbol;Acc:HGNC:3275]	0.980244
PKD2	polycystin 2, transient receptor potential cation channel [Source:HGNC Symbol;Acc:HGNC:9009]	0.980207
NISCH	nischarin [Source:HGNC Symbol;Acc:HGNC:18006]	0.979486
MYOZ1	myozenin 1 [Source:HGNC Symbol;Acc:HGNC:13752]	0.978432
ZC2HC1C	zinc finger C2HC-type containing 1C [Source:HGNC Symbol;Acc:HGNC:20354]	0.978418
CDKN1B	cyclin dependent kinase inhibitor 1B [Source:HGNC Symbol;Acc:HGNC:1785]	0.977935
KLHL12	kelch like family member 12 [Source:HGNC Symbol;Acc:HGNC:19360]	0.977354
RAD51C	RAD51 paralog C [Source:HGNC Symbol;Acc:HGNC:9820]	0.976468
LCMT1	leucine carboxyl methyltransferase 1 [Source:HGNC Symbol;Acc:HGNC:17557]	0.976149
MFSD2A	major facilitator superfamily domain containing 2A [Source:HGNC Symbol;Acc:HGNC:25897]	0.975821
TRAPPC11	trafficking protein particle complex 11 [Source:HGNC Symbol;Acc:HGNC:25751]	0.975567
STK17B	serine/threonine kinase 17b [Source:HGNC Symbol;Acc:HGNC:11396]	0.974629
OGN	osteoglycin [Source:HGNC Symbol;Acc:HGNC:8126]	0.972815
GLIPR1L1	GLIPR1 like 1 [Source:HGNC Symbol;Acc:HGNC:28392]	0.972581
C1QA	complement C1q A chain [Source:HGNC Symbol;Acc:HGNC:1241]	0.972391
SAR1A	secretion associated Ras related GTPase 1A [Source:HGNC Symbol;Acc:HGNC:10534]	0.971775
APPL2	adaptor protein, phosphotyrosine interacting with PH domain and leucine zipper 2 [Source:HGNC Symbol;Acc:HGNC:18242]	0.970662
FXYD4	FXYD domain containing ion transport regulator 4 [Source:HGNC Symbol;Acc:HGNC:4028]	0.969795
CUX2	cut like homeobox 2 [Source:HGNC Symbol;Acc:HGNC:19347]	0.969724
CYP27B1	cytochrome P450 family 27 subfamily B member 1 [Source:HGNC Symbol;Acc:HGNC:2606]	0.969724
GPAM	glycerol-3-phosphate acyltransferase, mitochondrial [Source:HGNC Symbol;Acc:HGNC:24865]	0.969293
PRKCA	protein kinase C alpha [Source:HGNC Symbol;Acc:HGNC:9393]	0.969089
GPT2	glutamic--pyruvic transaminase 2 [Source:HGNC Symbol;Acc:HGNC:18062]	0.968498
TNKS2	tankyrase 2 [Source:HGNC Symbol;Acc:HGNC:15677]	0.967415
PHGDH	phosphoglycerate dehydrogenase [Source:HGNC Symbol;Acc:HGNC:8923]	0.966553
ERICH6	glutamate rich 6 [Source:HGNC Symbol;Acc:HGNC:28602]	0.966536
DFFA	DNA fragmentation factor subunit alpha [Source:HGNC Symbol;Acc:HGNC:2772]	0.966174
SYCP2L	synaptonemal complex protein 2 like [Source:HGNC Symbol;Acc:HGNC:21537]	0.966077
PLLP	plasmolipin [Source:HGNC Symbol;Acc:HGNC:18553]	0.965127
FAM229B	family with sequence similarity 229 member B [Source:HGNC Symbol;Acc:HGNC:33858]	0.964765
SPACA9	sperm acrosome associated 9 [Source:HGNC Symbol;Acc:HGNC:1367]	0.964522
ZCCHC24	zinc finger CCHC-type containing 24 [Source:HGNC Symbol;Acc:HGNC:26911]	0.963707
BPNT2	3'(2'), 5'-bisphosphate nucleotidase 2 [Source:HGNC Symbol;Acc:HGNC:26019]	0.963318
FBXL20	F-box and leucine rich repeat protein 20 [Source:HGNC Symbol;Acc:HGNC:24679]	0.962879
SNORA64	small nucleolar RNA, H/ACA box 64 [Source:HGNC Symbol;Acc:HGNC:10221]	0.962471
JAK3	Janus kinase 3 [Source:HGNC Symbol;Acc:HGNC:6193]	0.962395
COL14A1	collagen type XIV alpha 1 chain [Source:HGNC Symbol;Acc:HGNC:2191]	0.962232
ALG10B	ALG10 alpha-1,2-glucosyltransferase B [Source:HGNC Symbol;Acc:HGNC:31088]	0.962016
YPEL1	yippee like 1 [Source:HGNC Symbol;Acc:HGNC:12845]	0.961519
CCDC158	coiled-coil domain containing 158 [Source:HGNC Symbol;Acc:HGNC:26374]	0.961512
UVSSA	UV stimulated scaffold protein A [Source:HGNC Symbol;Acc:HGNC:29304]	0.961435
VPS37A	VPS37A subunit of ESCRT-I [Source:HGNC Symbol;Acc:HGNC:24928]	0.960912
WDR7	WD repeat domain 7 [Source:HGNC Symbol;Acc:HGNC:13490]	0.960364
CSRP2	cysteine and glycine rich protein 2 [Source:HGNC Symbol;Acc:HGNC:2470]	0.959141
TDGF1	teratocarcinoma-derived growth factor 1 [Source:HGNC Symbol;Acc:HGNC:11701]	0.959019
WDR97	WD repeat domain 97 [Source:HGNC Symbol;Acc:HGNC:26959]	0.958934
MIR22	microRNA 22 [Source:HGNC Symbol;Acc:HGNC:31599]	0.957895
MROH6	maestro heat like repeat family member 6 [Source:HGNC Symbol;Acc:HGNC:27814]	0.957615
HDDC2	HD domain containing 2 [Source:HGNC Symbol;Acc:HGNC:21078]	0.955852
BRDT	bromodomain testis associated [Source:HGNC Symbol;Acc:HGNC:1105]	0.955033
FAM8A1	family with sequence similarity 8 member A1 [Source:HGNC Symbol;Acc:HGNC:16372]	0.954383
VPS26C	VPS26 endosomal protein sorting factor C [Source:HGNC Symbol;Acc:HGNC:3044]	0.95426
TAL1	TAL bHLH transcription factor 1, erythroid differentiation factor [Source:HGNC Symbol;Acc:HGNC:11556]	0.953976
CATSPERZ	catsper channel auxiliary subunit zeta [Source:HGNC Symbol;Acc:HGNC:19231]	0.953934
ICAM4	intercellular adhesion molecule 4 (Landsteiner-Wiener blood group) [Source:HGNC Symbol;Acc:HGNC:5347]	0.953779
STEAP4	STEAP4 metalloreductase [Source:HGNC Symbol;Acc:HGNC:21923]	0.953425
PRKAB2	protein kinase AMP-activated non-catalytic subunit beta 2 [Source:HGNC Symbol;Acc:HGNC:9379]	0.953245
PLCXD2	phosphatidylinositol specific phospholipase C X domain containing 2 [Source:HGNC Symbol;Acc:HGNC:26462]	0.953051
GVINP1	GTPase, very large interferon inducible pseudogene 1 [Source:HGNC Symbol;Acc:HGNC:25813]	0.952486
GNAL	G protein subunit alpha L [Source:HGNC Symbol;Acc:HGNC:4388]	0.951908
PLOD2	procollagen-lysine,2-oxoglutarate 5-dioxygenase 2 [Source:HGNC Symbol;Acc:HGNC:9082]	0.951477
C2orf88	chromosome 2 open reading frame 88 [Source:HGNC Symbol;Acc:HGNC:28191]	0.951218
MRGPRE	MAS related GPR family member E [Source:HGNC Symbol;Acc:HGNC:30694]	0.951199
ZFAND3	zinc finger AN1-type containing 3 [Source:HGNC Symbol;Acc:HGNC:18019]	0.951149
LRRC19	leucine rich repeat containing 19 [Source:HGNC Symbol;Acc:HGNC:23379]	0.950961
BTBD9	BTB domain containing 9 [Source:HGNC Symbol;Acc:HGNC:21228]	0.950804
GLO1	glyoxalase I [Source:HGNC Symbol;Acc:HGNC:4323]	0.950359
RNF145	ring finger protein 145 [Source:HGNC Symbol;Acc:HGNC:20853]	0.950236
RAB11FIP4	RAB11 family interacting protein 4 [Source:HGNC Symbol;Acc:HGNC:30267]	0.949315
ZDHHC20	zinc finger DHHC-type palmitoyltransferase 20 [Source:HGNC Symbol;Acc:HGNC:20749]	0.948608
FBXW9	F-box and WD repeat domain containing 9 [Source:HGNC Symbol;Acc:HGNC:28136]	0.948559
DNAH17	dynein axonemal heavy chain 17 [Source:HGNC Symbol;Acc:HGNC:2946]	0.947942
CD163	CD163 molecule [Source:HGNC Symbol;Acc:HGNC:1631]	0.947932
ARL14EP	ADP ribosylation factor like GTPase 14 effector protein [Source:HGNC Symbol;Acc:HGNC:26798]	0.947822
CAGE1	cancer antigen 1 [Source:HGNC Symbol;Acc:HGNC:21622]	0.947612
STXBP4	syntaxin binding protein 4 [Source:HGNC Symbol;Acc:HGNC:19694]	0.947579
APOC1	apolipoprotein C1 [Source:HGNC Symbol;Acc:HGNC:607]	0.947104
ZFYVE9	zinc finger FYVE-type containing 9 [Source:HGNC Symbol;Acc:HGNC:6775]	0.946876
PKD2L2	polycystin 2 like 2, transient receptor potential cation channel [Source:HGNC Symbol;Acc:HGNC:9012]	0.946645
ZNF354A	zinc finger protein 354A [Source:HGNC Symbol;Acc:HGNC:11628]	0.946522
CHML	CHM like Rab escort protein [Source:HGNC Symbol;Acc:HGNC:1941]	0.946332
PLPP2	phospholipid phosphatase 2 [Source:HGNC Symbol;Acc:HGNC:9230]	0.945987
TRIM72	tripartite motif containing 72 [Source:HGNC Symbol;Acc:HGNC:32671]	0.945596
STYX	serine/threonine/tyrosine interacting protein [Source:HGNC Symbol;Acc:HGNC:11447]	0.945408
PRX	periaxin [Source:HGNC Symbol;Acc:HGNC:13797]	0.945384
GOLM1	golgi membrane protein 1 [Source:HGNC Symbol;Acc:HGNC:15451]	0.944469
WARS1	tryptophanyl-tRNA synthetase 1 [Source:HGNC Symbol;Acc:HGNC:12729]	0.94336
RWDD2A	RWD domain containing 2A [Source:HGNC Symbol;Acc:HGNC:21385]	0.943261
PRR7	proline rich 7, synaptic [Source:HGNC Symbol;Acc:HGNC:28130]	0.942661
MBLAC2	metallo-beta-lactamase domain containing 2 [Source:HGNC Symbol;Acc:HGNC:33711]	0.942508
ARMCX5-GPRASP2	ARMCX5-GPRASP2 readthrough [Source:HGNC Symbol;Acc:HGNC:42000]	0.942482
FER1L6	fer-1 like family member 6 [Source:HGNC Symbol;Acc:HGNC:28065]	0.942127
C2orf49	chromosome 2 open reading frame 49 [Source:HGNC Symbol;Acc:HGNC:28772]	0.942042
GGNBP1	gametogenetin binding protein 1 (pseudogene) [Source:HGNC Symbol;Acc:HGNC:19427]	0.940588
KCP	kielin cysteine rich BMP regulator [Source:HGNC Symbol;Acc:HGNC:17585]	0.940503
MMP11	matrix metallopeptidase 11 [Source:HGNC Symbol;Acc:HGNC:7157]	0.940316
ZC3H8	zinc finger CCCH-type containing 8 [Source:HGNC Symbol;Acc:HGNC:30941]	0.940214
ATP11B	ATPase phospholipid transporting 11B (putative) [Source:HGNC Symbol;Acc:HGNC:13553]	0.939821
KIAA1217	KIAA1217 [Source:HGNC Symbol;Acc:HGNC:25428]	0.939738
ANXA2R	annexin A2 receptor [Source:HGNC Symbol;Acc:HGNC:33463]	0.939551
GPCPD1	glycerophosphocholine phosphodiesterase 1 [Source:HGNC Symbol;Acc:HGNC:26957]	0.939119
TST	thiosulfate sulfurtransferase [Source:HGNC Symbol;Acc:HGNC:12388]	0.939118
SPATA9	spermatogenesis associated 9 [Source:HGNC Symbol;Acc:HGNC:22988]	0.93815
ATXN7L3B	ataxin 7 like 3B [Source:HGNC Symbol;Acc:HGNC:37931]	0.937942
PRUNE1	prune exopolyphosphatase 1 [Source:HGNC Symbol;Acc:HGNC:13420]	0.937923
SNX24	sorting nexin 24 [Source:HGNC Symbol;Acc:HGNC:21533]	0.93663
DNHD1	dynein heavy chain domain 1 [Source:HGNC Symbol;Acc:HGNC:26532]	0.93638
ZNF726	zinc finger protein 726 [Source:HGNC Symbol;Acc:HGNC:32462]	0.936337
SV2A	synaptic vesicle glycoprotein 2A [Source:HGNC Symbol;Acc:HGNC:20566]	0.934842
MAF	MAF bZIP transcription factor [Source:HGNC Symbol;Acc:HGNC:6776]	0.934663
TRPT1	tRNA phosphotransferase 1 [Source:HGNC Symbol;Acc:HGNC:20316]	0.933951
RPS15A	ribosomal protein S15a [Source:HGNC Symbol;Acc:HGNC:10389]	0.932795
ZNF174	zinc finger protein 174 [Source:HGNC Symbol;Acc:HGNC:12963]	0.93227
DNAH2	dynein axonemal heavy chain 2 [Source:HGNC Symbol;Acc:HGNC:2948]	0.93155
FAM161A	FAM161 centrosomal protein A [Source:HGNC Symbol;Acc:HGNC:25808]	0.930947
RPRD1A	regulation of nuclear pre-mRNA domain containing 1A [Source:HGNC Symbol;Acc:HGNC:25560]	0.930686
UBXN7	UBX domain protein 7 [Source:HGNC Symbol;Acc:HGNC:29119]	0.929917
SLC40A1	solute carrier family 40 member 1 [Source:HGNC Symbol;Acc:HGNC:10909]	0.929599
DOCK6	dedicator of cytokinesis 6 [Source:HGNC Symbol;Acc:HGNC:19189]	0.929596
SLC35G1	solute carrier family 35 member G1 [Source:HGNC Symbol;Acc:HGNC:26607]	0.929531
EIF4B	eukaryotic translation initiation factor 4B [Source:HGNC Symbol;Acc:HGNC:3285]	0.929468
ZNF699	zinc finger protein 699 [Source:HGNC Symbol;Acc:HGNC:24750]	0.929412
FAM126A	family with sequence similarity 126 member A [Source:HGNC Symbol;Acc:HGNC:24587]	0.929383
SNX14	sorting nexin 14 [Source:HGNC Symbol;Acc:HGNC:14977]	0.929004
CD200R1L	CD200 receptor 1 like [Source:HGNC Symbol;Acc:HGNC:24665]	0.928943
APH1A	aph-1 homolog A, gamma-secretase subunit [Source:HGNC Symbol;Acc:HGNC:29509]	0.9284
NTAQ1	N-terminal glutamine amidase 1 [Source:HGNC Symbol;Acc:HGNC:25490]	0.92819
ZBTB18	zinc finger and BTB domain containing 18 [Source:HGNC Symbol;Acc:HGNC:13030]	0.92806
TATDN1	TatD DNase domain containing 1 [Source:HGNC Symbol;Acc:HGNC:24220]	0.927791
SLC20A1	solute carrier family 20 member 1 [Source:HGNC Symbol;Acc:HGNC:10946]	0.926902
IL22RA2	interleukin 22 receptor subunit alpha 2 [Source:HGNC Symbol;Acc:HGNC:14901]	0.9264
EFHD1	EF-hand domain family member D1 [Source:HGNC Symbol;Acc:HGNC:29556]	0.925983
ICMT	isoprenylcysteine carboxyl methyltransferase [Source:HGNC Symbol;Acc:HGNC:5350]	0.925651
AASDH	aminoadipate-semialdehyde dehydrogenase [Source:HGNC Symbol;Acc:HGNC:23993]	0.925515
POMK	protein O-mannose kinase [Source:HGNC Symbol;Acc:HGNC:26267]	0.925133
MIGA1	mitoguardin 1 [Source:HGNC Symbol;Acc:HGNC:24741]	0.924788
IRGQ	immunity related GTPase Q [Source:HGNC Symbol;Acc:HGNC:24868]	0.924461
ATP8A1	ATPase phospholipid transporting 8A1 [Source:HGNC Symbol;Acc:HGNC:13531]	0.923615
LRRC58	leucine rich repeat containing 58 [Source:HGNC Symbol;Acc:HGNC:26968]	0.922822
AARS2	alanyl-tRNA synthetase 2, mitochondrial [Source:HGNC Symbol;Acc:HGNC:21022]	0.922383
RAB25	RAB25, member RAS oncogene family [Source:HGNC Symbol;Acc:HGNC:18238]	0.92196
ACAD8	acyl-CoA dehydrogenase family member 8 [Source:HGNC Symbol;Acc:HGNC:87]	0.921916
POGLUT1	protein O-glucosyltransferase 1 [Source:HGNC Symbol;Acc:HGNC:22954]	0.921606
ANGPTL6	angiopoietin like 6 [Source:HGNC Symbol;Acc:HGNC:23140]	0.920046
JMY	junction mediating and regulatory protein, p53 cofactor [Source:HGNC Symbol;Acc:HGNC:28916]	0.919919
ARMC1	armadillo repeat containing 1 [Source:HGNC Symbol;Acc:HGNC:17684]	0.919899
KLHL2	kelch like family member 2 [Source:HGNC Symbol;Acc:HGNC:6353]	0.919439
AS3MT	arsenite methyltransferase [Source:HGNC Symbol;Acc:HGNC:17452]	0.918985
PTAFR	platelet activating factor receptor [Source:HGNC Symbol;Acc:HGNC:9582]	0.918942
PRKDC	protein kinase, DNA-activated, catalytic subunit [Source:HGNC Symbol;Acc:HGNC:9413]	0.918287
RCBTB1	RCC1 and BTB domain containing protein 1 [Source:HGNC Symbol;Acc:HGNC:18243]	0.917902
RAP1GAP2	RAP1 GTPase activating protein 2 [Source:HGNC Symbol;Acc:HGNC:29176]	0.917586
RABAC1	Rab acceptor 1 [Source:HGNC Symbol;Acc:HGNC:9794]	0.917565
MMP9	matrix metallopeptidase 9 [Source:HGNC Symbol;Acc:HGNC:7176]	0.917525
CPQ	carboxypeptidase Q [Source:HGNC Symbol;Acc:HGNC:16910]	0.916797
TIGD5	tigger transposable element derived 5 [Source:HGNC Symbol;Acc:HGNC:18336]	0.916628
ABITRAM	actin binding transcription modulator [Source:HGNC Symbol;Acc:HGNC:1364]	0.916115
EPB41L5	erythrocyte membrane protein band 4.1 like 5 [Source:HGNC Symbol;Acc:HGNC:19819]	0.915688
SLC39A2	solute carrier family 39 member 2 [Source:HGNC Symbol;Acc:HGNC:17127]	0.915445
ADK	adenosine kinase [Source:HGNC Symbol;Acc:HGNC:257]	0.914718
LRTM2	leucine rich repeats and transmembrane domains 2 [Source:HGNC Symbol;Acc:HGNC:32443]	0.914546
MGAT3	beta-1,4-mannosyl-glycoprotein 4-beta-N-acetylglucosaminyltransferase [Source:HGNC Symbol;Acc:HGNC:7046]	0.914546
ZNF202	zinc finger protein 202 [Source:HGNC Symbol;Acc:HGNC:12994]	0.913979
MSH4	mutS homolog 4 [Source:HGNC Symbol;Acc:HGNC:7327]	0.913736
PLCL2	phospholipase C like 2 [Source:HGNC Symbol;Acc:HGNC:9064]	0.91373
C3orf20	chromosome 3 open reading frame 20 [Source:HGNC Symbol;Acc:HGNC:25320]	0.913134
ZYG11B	zyg-11 family member B, cell cycle regulator [Source:HGNC Symbol;Acc:HGNC:25820]	0.912897
MTFR1	mitochondrial fission regulator 1 [Source:HGNC Symbol;Acc:HGNC:29510]	0.912655
GAMT	guanidinoacetate N-methyltransferase [Source:HGNC Symbol;Acc:HGNC:4136]	0.912579
KRT80	keratin 80 [Source:HGNC Symbol;Acc:HGNC:27056]	0.912105
ABCD4	ATP binding cassette subfamily D member 4 [Source:HGNC Symbol;Acc:HGNC:68]	0.911852
SNAPC1	small nuclear RNA activating complex polypeptide 1 [Source:HGNC Symbol;Acc:HGNC:11134]	0.911298
ADAM32	ADAM metallopeptidase domain 32 [Source:HGNC Symbol;Acc:HGNC:15479]	0.911224
HES6	hes family bHLH transcription factor 6 [Source:HGNC Symbol;Acc:HGNC:18254]	0.91107
RAB20	RAB20, member RAS oncogene family [Source:HGNC Symbol;Acc:HGNC:18260]	0.910991
FKBP5	FKBP prolyl isomerase 5 [Source:HGNC Symbol;Acc:HGNC:3721]	0.910913
PTDSS1	phosphatidylserine synthase 1 [Source:HGNC Symbol;Acc:HGNC:9587]	0.910343
KIF3B	kinesin family member 3B [Source:HGNC Symbol;Acc:HGNC:6320]	0.910318
HACD4	3-hydroxyacyl-CoA dehydratase 4 [Source:HGNC Symbol;Acc:HGNC:20920]	0.910316
LYPLAL1	lysophospholipase like 1 [Source:HGNC Symbol;Acc:HGNC:20440]	0.910097
SLC12A5	solute carrier family 12 member 5 [Source:HGNC Symbol;Acc:HGNC:13818]	0.91006
LMBR1L	limb development membrane protein 1 like [Source:HGNC Symbol;Acc:HGNC:18268]	0.910011
SELENOF	selenoprotein F [Source:HGNC Symbol;Acc:HGNC:17705]	0.909744
ZNF217	zinc finger protein 217 [Source:HGNC Symbol;Acc:HGNC:13009]	0.909184
QRFP	pyroglutamylated RFamide peptide [Source:HGNC Symbol;Acc:HGNC:29982]	0.908956
MT-TL2	mitochondrially encoded tRNA-Leu (CUN) 2 [Source:HGNC Symbol;Acc:HGNC:7491]	0.908716
CA11	carbonic anhydrase 11 [Source:HGNC Symbol;Acc:HGNC:1370]	0.908546
FCHO2	FCH and mu domain containing endocytic adaptor 2 [Source:HGNC Symbol;Acc:HGNC:25180]	0.908125
CBX6	chromobox 6 [Source:HGNC Symbol;Acc:HGNC:1556]	0.907443
UCK2	uridine-cytidine kinase 2 [Source:HGNC Symbol;Acc:HGNC:12562]	0.907421
ZGPAT	zinc finger CCCH-type and G-patch domain containing [Source:HGNC Symbol;Acc:HGNC:15948]	0.906731
GAN	gigaxonin [Source:HGNC Symbol;Acc:HGNC:4137]	0.905871
SPIRE1	spire type actin nucleation factor 1 [Source:HGNC Symbol;Acc:HGNC:30622]	0.90535
TSPAN15	tetraspanin 15 [Source:HGNC Symbol;Acc:HGNC:23298]	0.905234
MGMT	O-6-methylguanine-DNA methyltransferase [Source:HGNC Symbol;Acc:HGNC:7059]	0.904934
ZKSCAN7	zinc finger with KRAB and SCAN domains 7 [Source:HGNC Symbol;Acc:HGNC:12955]	0.904734
VAMP1	vesicle associated membrane protein 1 [Source:HGNC Symbol;Acc:HGNC:12642]	0.903619
SHE	Src homology 2 domain containing E [Source:HGNC Symbol;Acc:HGNC:27004]	0.903466
ZNF106	zinc finger protein 106 [Source:HGNC Symbol;Acc:HGNC:12886]	0.902448
RWDD3	RWD domain containing 3 [Source:HGNC Symbol;Acc:HGNC:21393]	0.902447
CD81	CD81 molecule [Source:HGNC Symbol;Acc:HGNC:1701]	0.901689
GXYLT1	glucoside xylosyltransferase 1 [Source:HGNC Symbol;Acc:HGNC:27482]	0.900972
HELQ	helicase, POLQ like [Source:HGNC Symbol;Acc:HGNC:18536]	0.900834
UGP2	UDP-glucose pyrophosphorylase 2 [Source:HGNC Symbol;Acc:HGNC:12527]	0.899352
RAB23	RAB23, member RAS oncogene family [Source:HGNC Symbol;Acc:HGNC:14263]	0.899334
SLC25A30	solute carrier family 25 member 30 [Source:HGNC Symbol;Acc:HGNC:27371]	0.899079
NT5DC2	5'-nucleotidase domain containing 2 [Source:HGNC Symbol;Acc:HGNC:25717]	0.898862
PTP4A1	protein tyrosine phosphatase 4A1 [Source:HGNC Symbol;Acc:HGNC:9634]	0.898537
TPT1	tumor protein, translationally-controlled 1 [Source:HGNC Symbol;Acc:HGNC:12022]	0.898529
TMEM156	transmembrane protein 156 [Source:HGNC Symbol;Acc:HGNC:26260]	0.898355
SLC37A1	solute carrier family 37 member 1 [Source:HGNC Symbol;Acc:HGNC:11024]	0.898248
CREBL2	cAMP responsive element binding protein like 2 [Source:HGNC Symbol;Acc:HGNC:2350]	0.897764
ITGA6	integrin subunit alpha 6 [Source:HGNC Symbol;Acc:HGNC:6142]	0.89748
TCAF1	TRPM8 channel associated factor 1 [Source:HGNC Symbol;Acc:HGNC:22201]	0.897307
LPCAT4	lysophosphatidylcholine acyltransferase 4 [Source:HGNC Symbol;Acc:HGNC:30059]	0.89676
ZCWPW1	zinc finger CW-type and PWWP domain containing 1 [Source:HGNC Symbol;Acc:HGNC:23486]	0.896658
TASOR	transcription activation suppressor [Source:HGNC Symbol;Acc:HGNC:30314]	0.896453
ZNF445	zinc finger protein 445 [Source:HGNC Symbol;Acc:HGNC:21018]	0.895233
ADGRD1	adhesion G protein-coupled receptor D1 [Source:HGNC Symbol;Acc:HGNC:19893]	0.895002
BBS5	Bardet-Biedl syndrome 5 [Source:HGNC Symbol;Acc:HGNC:970]	0.894895
SEC23A	Sec23 homolog A, COPII coat complex component [Source:HGNC Symbol;Acc:HGNC:10701]	0.894677
CNPY2	canopy FGF signaling regulator 2 [Source:HGNC Symbol;Acc:HGNC:13529]	0.893941
FAM83H	family with sequence similarity 83 member H [Source:HGNC Symbol;Acc:HGNC:24797]	0.893827
NTPCR	nucleoside-triphosphatase, cancer-related [Source:HGNC Symbol;Acc:HGNC:28204]	0.893468
SLC22A13	solute carrier family 22 member 13 [Source:HGNC Symbol;Acc:HGNC:8494]	0.893429
SRRM2	serine/arginine repetitive matrix 2 [Source:HGNC Symbol;Acc:HGNC:16639]	0.893215
TNFRSF13B	TNF receptor superfamily member 13B [Source:HGNC Symbol;Acc:HGNC:18153]	0.893162
VGLL3	vestigial like family member 3 [Source:HGNC Symbol;Acc:HGNC:24327]	0.892591
EBPL	EBP like [Source:HGNC Symbol;Acc:HGNC:18061]	0.892245
USP30	ubiquitin specific peptidase 30 [Source:HGNC Symbol;Acc:HGNC:20065]	0.891118
DUSP6	dual specificity phosphatase 6 [Source:HGNC Symbol;Acc:HGNC:3072]	0.890857
TBC1D15	TBC1 domain family member 15 [Source:HGNC Symbol;Acc:HGNC:25694]	0.890673
TBKBP1	TBK1 binding protein 1 [Source:HGNC Symbol;Acc:HGNC:30140]	0.890211
TXNDC15	thioredoxin domain containing 15 [Source:HGNC Symbol;Acc:HGNC:20652]	0.889977
TTC5	tetratricopeptide repeat domain 5 [Source:HGNC Symbol;Acc:HGNC:19274]	0.88982
TMEM167B	transmembrane protein 167B [Source:HGNC Symbol;Acc:HGNC:30187]	0.888703
ETFBKMT	electron transfer flavoprotein subunit beta lysine methyltransferase [Source:HGNC Symbol;Acc:HGNC:28739]	0.888365
GPR157	G protein-coupled receptor 157 [Source:HGNC Symbol;Acc:HGNC:23687]	0.888005
FZD4	frizzled class receptor 4 [Source:HGNC Symbol;Acc:HGNC:4042]	0.887949
TMED9	transmembrane p24 trafficking protein 9 [Source:HGNC Symbol;Acc:HGNC:24878]	0.886984
SDR42E1	short chain dehydrogenase/reductase family 42E, member 1 [Source:HGNC Symbol;Acc:HGNC:29834]	0.886399
CATIP	ciliogenesis associated TTC17 interacting protein [Source:HGNC Symbol;Acc:HGNC:25062]	0.884932
RAB11FIP3	RAB11 family interacting protein 3 [Source:HGNC Symbol;Acc:HGNC:17224]	0.884894
EIF1	eukaryotic translation initiation factor 1 [Source:HGNC Symbol;Acc:HGNC:3249]	0.884874
SAR1B	secretion associated Ras related GTPase 1B [Source:HGNC Symbol;Acc:HGNC:10535]	0.884747
RAB5A	RAB5A, member RAS oncogene family [Source:HGNC Symbol;Acc:HGNC:9783]	0.884682
NOS3	nitric oxide synthase 3 [Source:HGNC Symbol;Acc:HGNC:7876]	0.884124
ST6GAL1	ST6 beta-galactoside alpha-2,6-sialyltransferase 1 [Source:HGNC Symbol;Acc:HGNC:10860]	0.883784
SAMD14	sterile alpha motif domain containing 14 [Source:HGNC Symbol;Acc:HGNC:27312]	0.88229
TMC6	transmembrane channel like 6 [Source:HGNC Symbol;Acc:HGNC:18021]	0.881954
KLF13	Kruppel like factor 13 [Source:HGNC Symbol;Acc:HGNC:13672]	0.881936
VAMP4	vesicle associated membrane protein 4 [Source:HGNC Symbol;Acc:HGNC:12645]	0.881647
PI4K2B	phosphatidylinositol 4-kinase type 2 beta [Source:HGNC Symbol;Acc:HGNC:18215]	0.881646
STRBP	spermatid perinuclear RNA binding protein [Source:HGNC Symbol;Acc:HGNC:16462]	0.881046
SYPL1	synaptophysin like 1 [Source:HGNC Symbol;Acc:HGNC:11507]	0.880519
NPR2	natriuretic peptide receptor 2 [Source:HGNC Symbol;Acc:HGNC:7944]	0.880238
RPS4X	ribosomal protein S4 X-linked [Source:HGNC Symbol;Acc:HGNC:10424]	0.879866
DOCK7	dedicator of cytokinesis 7 [Source:HGNC Symbol;Acc:HGNC:19190]	0.879476
ATMIN	ATM interactor [Source:HGNC Symbol;Acc:HGNC:29034]	0.879162
DCST2	DC-STAMP domain containing 2 [Source:HGNC Symbol;Acc:HGNC:26562]	0.878775
SEC11A	SEC11 homolog A, signal peptidase complex subunit [Source:HGNC Symbol;Acc:HGNC:17718]	0.878635
EVA1B	eva-1 homolog B [Source:HGNC Symbol;Acc:HGNC:25558]	0.87841
STARD7	StAR related lipid transfer domain containing 7 [Source:HGNC Symbol;Acc:HGNC:18063]	0.876956
METTL21A	methyltransferase like 21A [Source:HGNC Symbol;Acc:HGNC:30476]	0.876616
GLIPR2	GLI pathogenesis related 2 [Source:HGNC Symbol;Acc:HGNC:18007]	0.876483
C11orf71	chromosome 11 open reading frame 71 [Source:HGNC Symbol;Acc:HGNC:25937]	0.876146
TIFAB	TIFA inhibitor [Source:HGNC Symbol;Acc:HGNC:34024]	0.876142
SLC20A2	solute carrier family 20 member 2 [Source:HGNC Symbol;Acc:HGNC:10947]	0.875899
GMFB	glia maturation factor beta [Source:HGNC Symbol;Acc:HGNC:4373]	0.875852
KHNYN	KH and NYN domain containing [Source:HGNC Symbol;Acc:HGNC:20166]	0.875814
MANEA	mannosidase endo-alpha [Source:HGNC Symbol;Acc:HGNC:21072]	0.875564
PEX11B	peroxisomal biogenesis factor 11 beta [Source:HGNC Symbol;Acc:HGNC:8853]	0.875563
MAP4K2	mitogen-activated protein kinase kinase kinase kinase 2 [Source:HGNC Symbol;Acc:HGNC:6864]	0.875153
GPR62	G protein-coupled receptor 62 [Source:HGNC Symbol;Acc:HGNC:13301]	0.875004
VMP1	vacuole membrane protein 1 [Source:HGNC Symbol;Acc:HGNC:29559]	0.874271
ERH	ERH mRNA splicing and mitosis factor [Source:HGNC Symbol;Acc:HGNC:3447]	0.873934
KLHL26	kelch like family member 26 [Source:HGNC Symbol;Acc:HGNC:25623]	0.872947
SGMS1-AS1	SGMS1 antisense RNA 1 [Source:HGNC Symbol;Acc:HGNC:49683]	0.872825
FUZ	fuzzy planar cell polarity protein [Source:HGNC Symbol;Acc:HGNC:26219]	0.872519
SEC24A	SEC24 homolog A, COPII coat complex component [Source:HGNC Symbol;Acc:HGNC:10703]	0.871605
C19orf38	chromosome 19 open reading frame 38 [Source:HGNC Symbol;Acc:HGNC:34073]	0.871117
PGAM1	phosphoglycerate mutase 1 [Source:HGNC Symbol;Acc:HGNC:8888]	0.870844
USP22	ubiquitin specific peptidase 22 [Source:HGNC Symbol;Acc:HGNC:12621]	0.869556
F8	coagulation factor VIII [Source:HGNC Symbol;Acc:HGNC:3546]	0.869286
SLC22A23	solute carrier family 22 member 23 [Source:HGNC Symbol;Acc:HGNC:21106]	0.868535
ZG16	zymogen granule protein 16 [Source:HGNC Symbol;Acc:HGNC:30961]	0.86852
SF3B1	splicing factor 3b subunit 1 [Source:HGNC Symbol;Acc:HGNC:10768]	0.868444
FBXO32	F-box protein 32 [Source:HGNC Symbol;Acc:HGNC:16731]	0.86821
AK1	adenylate kinase 1 [Source:HGNC Symbol;Acc:HGNC:361]	0.867149
HOPX	HOP homeobox [Source:HGNC Symbol;Acc:HGNC:24961]	0.86683
SLC2A5	solute carrier family 2 member 5 [Source:HGNC Symbol;Acc:HGNC:11010]	0.866054
EFEMP2	EGF containing fibulin extracellular matrix protein 2 [Source:HGNC Symbol;Acc:HGNC:3219]	0.866007
ZFP2	ZFP2 zinc finger protein [Source:HGNC Symbol;Acc:HGNC:26138]	0.86599
SERINC5	serine incorporator 5 [Source:HGNC Symbol;Acc:HGNC:18825]	0.865938
TFCP2L1	transcription factor CP2 like 1 [Source:HGNC Symbol;Acc:HGNC:17925]	0.865279
AGMO	alkylglycerol monooxygenase [Source:HGNC Symbol;Acc:HGNC:33784]	0.864575
GATD3B	glutamine amidotransferase like class 1 domain containing 3B [Source:HGNC Symbol;Acc:HGNC:53816]	0.864556
RUFY2	RUN and FYVE domain containing 2 [Source:HGNC Symbol;Acc:HGNC:19761]	0.864556
TMEM253	transmembrane protein 253 [Source:HGNC Symbol;Acc:HGNC:32545]	0.86451
PPEF2	protein phosphatase with EF-hand domain 2 [Source:HGNC Symbol;Acc:HGNC:9244]	0.86423
POLL	DNA polymerase lambda [Source:HGNC Symbol;Acc:HGNC:9184]	0.864054
TBXAS1	thromboxane A synthase 1 [Source:HGNC Symbol;Acc:HGNC:11609]	0.863916
ST14	ST14 transmembrane serine protease matriptase [Source:HGNC Symbol;Acc:HGNC:11344]	0.863666
MYSM1	Myb like, SWIRM and MPN domains 1 [Source:HGNC Symbol;Acc:HGNC:29401]	0.863127
RPL5	ribosomal protein L5 [Source:HGNC Symbol;Acc:HGNC:10360]	0.862934
GHR	growth hormone receptor [Source:HGNC Symbol;Acc:HGNC:4263]	0.862453
SND1	staphylococcal nuclease and tudor domain containing 1 [Source:HGNC Symbol;Acc:HGNC:30646]	0.862362
SLC35D2	solute carrier family 35 member D2 [Source:HGNC Symbol;Acc:HGNC:20799]	0.862242
LOXL1	lysyl oxidase like 1 [Source:HGNC Symbol;Acc:HGNC:6665]	0.861845
GZF1	GDNF inducible zinc finger protein 1 [Source:HGNC Symbol;Acc:HGNC:15808]	0.861748
KLHL25	kelch like family member 25 [Source:HGNC Symbol;Acc:HGNC:25732]	0.861435
SPOCK2	SPARC (osteonectin), cwcv and kazal like domains proteoglycan 2 [Source:HGNC Symbol;Acc:HGNC:13564]	0.861032
RPS3	ribosomal protein S3 [Source:HGNC Symbol;Acc:HGNC:10420]	0.861005
PER2	period circadian regulator 2 [Source:HGNC Symbol;Acc:HGNC:8846]	0.860616
VGLL4	vestigial like family member 4 [Source:HGNC Symbol;Acc:HGNC:28966]	0.86026
KCNIP2	potassium voltage-gated channel interacting protein 2 [Source:HGNC Symbol;Acc:HGNC:15522]	0.859865
BRI3BP	BRI3 binding protein [Source:HGNC Symbol;Acc:HGNC:14251]	0.859679
GAS2	growth arrest specific 2 [Source:HGNC Symbol;Acc:HGNC:4167]	0.858914
ZSWIM9	zinc finger SWIM-type containing 9 [Source:HGNC Symbol;Acc:HGNC:34495]	0.858857
WHRN	whirlin [Source:HGNC Symbol;Acc:HGNC:16361]	0.858727
DEPTOR	DEP domain containing MTOR interacting protein [Source:HGNC Symbol;Acc:HGNC:22953]	0.858265
SMIM4	small integral membrane protein 4 [Source:HGNC Symbol;Acc:HGNC:37257]	0.85769
RETSAT	retinol saturase [Source:HGNC Symbol;Acc:HGNC:25991]	0.856398
SEC31B	SEC31 homolog B, COPII coat complex component [Source:HGNC Symbol;Acc:HGNC:23197]	0.85613
DENND3	DENN domain containing 3 [Source:HGNC Symbol;Acc:HGNC:29134]	0.855682
CAPRIN2	caprin family member 2 [Source:HGNC Symbol;Acc:HGNC:21259]	0.855634
NFE2L3	nuclear factor, erythroid 2 like 3 [Source:HGNC Symbol;Acc:HGNC:7783]	0.854841
ZBTB8A	zinc finger and BTB domain containing 8A [Source:HGNC Symbol;Acc:HGNC:24172]	0.854735
TBX19	T-box transcription factor 19 [Source:HGNC Symbol;Acc:HGNC:11596]	0.853942
EEF1B2	eukaryotic translation elongation factor 1 beta 2 [Source:HGNC Symbol;Acc:HGNC:3208]	0.853388
MT-TY	mitochondrially encoded tRNA-Tyr (UAU/C) [Source:HGNC Symbol;Acc:HGNC:7502]	0.852978
ARL5B	ADP ribosylation factor like GTPase 5B [Source:HGNC Symbol;Acc:HGNC:23052]	0.852723
TCP11L2	t-complex 11 like 2 [Source:HGNC Symbol;Acc:HGNC:28627]	0.852463
SFXN1	sideroflexin 1 [Source:HGNC Symbol;Acc:HGNC:16085]	0.852032
NIM1K	NIM1 serine/threonine protein kinase [Source:HGNC Symbol;Acc:HGNC:28646]	0.851748
KIAA0513	KIAA0513 [Source:HGNC Symbol;Acc:HGNC:29058]	0.851331
ZNF786	zinc finger protein 786 [Source:HGNC Symbol;Acc:HGNC:21806]	0.850884
GMPR	guanosine monophosphate reductase [Source:HGNC Symbol;Acc:HGNC:4376]	0.85008
NHLRC3	NHL repeat containing 3 [Source:HGNC Symbol;Acc:HGNC:33751]	0.849902
PAM	peptidylglycine alpha-amidating monooxygenase [Source:HGNC Symbol;Acc:HGNC:8596]	0.84946
GBP7	guanylate binding protein 7 [Source:HGNC Symbol;Acc:HGNC:29606]	0.848812
RPL6	ribosomal protein L6 [Source:HGNC Symbol;Acc:HGNC:10362]	0.848768
CTDP1	CTD phosphatase subunit 1 [Source:HGNC Symbol;Acc:HGNC:2498]	0.848736
PSME4	proteasome activator subunit 4 [Source:HGNC Symbol;Acc:HGNC:20635]	0.84866
GPM6B	glycoprotein M6B [Source:HGNC Symbol;Acc:HGNC:4461]	0.848539
HDAC7	histone deacetylase 7 [Source:HGNC Symbol;Acc:HGNC:14067]	0.848496
PCSK9	proprotein convertase subtilisin/kexin type 9 [Source:HGNC Symbol;Acc:HGNC:20001]	0.848201
SCN1B	sodium voltage-gated channel beta subunit 1 [Source:HGNC Symbol;Acc:HGNC:10586]	0.84812
PSMA8	proteasome 20S subunit alpha 8 [Source:HGNC Symbol;Acc:HGNC:22985]	0.847694
ERO1A	endoplasmic reticulum oxidoreductase 1 alpha [Source:HGNC Symbol;Acc:HGNC:13280]	0.847626
TSPAN4	tetraspanin 4 [Source:HGNC Symbol;Acc:HGNC:11859]	0.847511
EPN1	epsin 1 [Source:HGNC Symbol;Acc:HGNC:21604]	0.846759
PPP3R1	protein phosphatase 3 regulatory subunit B, alpha [Source:HGNC Symbol;Acc:HGNC:9317]	0.846544
LPAR6	lysophosphatidic acid receptor 6 [Source:HGNC Symbol;Acc:HGNC:15520]	0.846499
CSF2RB	colony stimulating factor 2 receptor subunit beta [Source:HGNC Symbol;Acc:HGNC:2436]	0.845889
CAPN8	calpain 8 [Source:HGNC Symbol;Acc:HGNC:1485]	0.845752
SERPINE1	serpin family E member 1 [Source:HGNC Symbol;Acc:HGNC:8583]	0.845512
FKBP10	FKBP prolyl isomerase 10 [Source:HGNC Symbol;Acc:HGNC:18169]	0.845102
C9orf85	chromosome 9 open reading frame 85 [Source:HGNC Symbol;Acc:HGNC:28784]	0.844958
MTHFD1L	methylenetetrahydrofolate dehydrogenase (NADP+ dependent) 1 like [Source:HGNC Symbol;Acc:HGNC:21055]	0.84491
BNIPL	BCL2 interacting protein like [Source:HGNC Symbol;Acc:HGNC:16976]	0.844718
ARMC3	armadillo repeat containing 3 [Source:HGNC Symbol;Acc:HGNC:30964]	0.844491
STOML1	stomatin like 1 [Source:HGNC Symbol;Acc:HGNC:14560]	0.844057
ECM1	extracellular matrix protein 1 [Source:HGNC Symbol;Acc:HGNC:3153]	0.843497
WWP1	WW domain containing E3 ubiquitin protein ligase 1 [Source:HGNC Symbol;Acc:HGNC:17004]	0.843447
ZSCAN18	zinc finger and SCAN domain containing 18 [Source:HGNC Symbol;Acc:HGNC:21037]	0.843072
HYI	hydroxypyruvate isomerase (putative) [Source:HGNC Symbol;Acc:HGNC:26948]	0.842853
CNPY4	canopy FGF signaling regulator 4 [Source:HGNC Symbol;Acc:HGNC:28631]	0.842837
TMEM101	transmembrane protein 101 [Source:HGNC Symbol;Acc:HGNC:28653]	0.842502
RPL15	ribosomal protein L15 [Source:HGNC Symbol;Acc:HGNC:10306]	0.841539
AOC2	amine oxidase copper containing 2 [Source:HGNC Symbol;Acc:HGNC:549]	0.841363
HSDL1	hydroxysteroid dehydrogenase like 1 [Source:HGNC Symbol;Acc:HGNC:16475]	0.840544
RELL2	RELT like 2 [Source:HGNC Symbol;Acc:HGNC:26902]	0.840516
POLR1G	RNA polymerase I subunit G [Source:HGNC Symbol;Acc:HGNC:24219]	0.840302
PNCK	pregnancy up-regulated nonubiquitous CaM kinase [Source:HGNC Symbol;Acc:HGNC:13415]	0.839787
MRPL33	mitochondrial ribosomal protein L33 [Source:HGNC Symbol;Acc:HGNC:14487]	0.839636
SLC17A9	solute carrier family 17 member 9 [Source:HGNC Symbol;Acc:HGNC:16192]	0.838786
SLC25A31	solute carrier family 25 member 31 [Source:HGNC Symbol;Acc:HGNC:25319]	0.83869
VIRMA	vir like m6A methyltransferase associated [Source:HGNC Symbol;Acc:HGNC:24500]	0.838658
S100A5	S100 calcium binding protein A5 [Source:HGNC Symbol;Acc:HGNC:10495]	0.838464
MTX3	metaxin 3 [Source:HGNC Symbol;Acc:HGNC:24812]	0.838405
TMEM269	transmembrane protein 269 [Source:HGNC Symbol;Acc:HGNC:52381]	0.838266
LIN7C	lin-7 homolog C, crumbs cell polarity complex component [Source:HGNC Symbol;Acc:HGNC:17789]	0.83819
PHF13	PHD finger protein 13 [Source:HGNC Symbol;Acc:HGNC:22983]	0.837979
CCDC171	coiled-coil domain containing 171 [Source:HGNC Symbol;Acc:HGNC:29828]	0.837707
TLN2	talin 2 [Source:HGNC Symbol;Acc:HGNC:15447]	0.837625
COX19	cytochrome c oxidase assembly factor COX19 [Source:HGNC Symbol;Acc:HGNC:28074]	0.837471
ERBB3	erb-b2 receptor tyrosine kinase 3 [Source:HGNC Symbol;Acc:HGNC:3431]	0.837369
ULK3	unc-51 like kinase 3 [Source:HGNC Symbol;Acc:HGNC:19703]	0.836418
COL25A1	collagen type XXV alpha 1 chain [Source:HGNC Symbol;Acc:HGNC:18603]	0.835934
MFSD13A	major facilitator superfamily domain containing 13A [Source:HGNC Symbol;Acc:HGNC:26196]	0.835326
ANKRD13D	ankyrin repeat domain 13D [Source:HGNC Symbol;Acc:HGNC:27880]	0.835105
TMSB4X	thymosin beta 4 X-linked [Source:HGNC Symbol;Acc:HGNC:11881]	0.834171
MAP3K10	mitogen-activated protein kinase kinase kinase 10 [Source:HGNC Symbol;Acc:HGNC:6849]	0.83407
C1QC	complement C1q C chain [Source:HGNC Symbol;Acc:HGNC:1245]	0.833181
WDR35	WD repeat domain 35 [Source:HGNC Symbol;Acc:HGNC:29250]	0.832816
PELI3	pellino E3 ubiquitin protein ligase family member 3 [Source:HGNC Symbol;Acc:HGNC:30010]	0.831936
KY	kyphoscoliosis peptidase [Source:HGNC Symbol;Acc:HGNC:26576]	0.831795
TMEM87B	transmembrane protein 87B [Source:HGNC Symbol;Acc:HGNC:25913]	0.830818
HS6ST1	heparan sulfate 6-O-sulfotransferase 1 [Source:HGNC Symbol;Acc:HGNC:5201]	0.830142
TBC1D20	TBC1 domain family member 20 [Source:HGNC Symbol;Acc:HGNC:16133]	0.829565
CYTH1	cytohesin 1 [Source:HGNC Symbol;Acc:HGNC:9501]	0.828886
ANXA9	annexin A9 [Source:HGNC Symbol;Acc:HGNC:547]	0.828882
LRFN1	leucine rich repeat and fibronectin type III domain containing 1 [Source:HGNC Symbol;Acc:HGNC:29290]	0.828252
TSSK4	testis specific serine kinase 4 [Source:HGNC Symbol;Acc:HGNC:19825]	0.827466
SPATA46	spermatogenesis associated 46 [Source:HGNC Symbol;Acc:HGNC:27648]	0.827444
ZNF18	zinc finger protein 18 [Source:HGNC Symbol;Acc:HGNC:12969]	0.827251
FUNDC1	FUN14 domain containing 1 [Source:HGNC Symbol;Acc:HGNC:28746]	0.827146
GAL3ST3	galactose-3-O-sulfotransferase 3 [Source:HGNC Symbol;Acc:HGNC:24144]	0.82658
MTTP	microsomal triglyceride transfer protein [Source:HGNC Symbol;Acc:HGNC:7467]	0.826166
TMEM81	transmembrane protein 81 [Source:HGNC Symbol;Acc:HGNC:32349]	0.825316
IDH1	isocitrate dehydrogenase (NADP(+)) 1 [Source:HGNC Symbol;Acc:HGNC:5382]	0.825186
PLEKHG6	pleckstrin homology and RhoGEF domain containing G6 [Source:HGNC Symbol;Acc:HGNC:25562]	0.8245
CBX3	chromobox 3 [Source:HGNC Symbol;Acc:HGNC:1553]	0.824479
CRIM1	cysteine rich transmembrane BMP regulator 1 [Source:HGNC Symbol;Acc:HGNC:2359]	0.824153
NTHL1	nth like DNA glycosylase 1 [Source:HGNC Symbol;Acc:HGNC:8028]	0.823205
LY86	lymphocyte antigen 86 [Source:HGNC Symbol;Acc:HGNC:16837]	0.823078
ECE1	endothelin converting enzyme 1 [Source:HGNC Symbol;Acc:HGNC:3146]	0.822956
RPL7	ribosomal protein L7 [Source:HGNC Symbol;Acc:HGNC:10363]	0.822948
CERS6	ceramide synthase 6 [Source:HGNC Symbol;Acc:HGNC:23826]	0.822696
LEAP2	liver enriched antimicrobial peptide 2 [Source:HGNC Symbol;Acc:HGNC:29571]	0.82199
KIAA0895	KIAA0895 [Source:HGNC Symbol;Acc:HGNC:22206]	0.821715
GIPC2	GIPC PDZ domain containing family member 2 [Source:HGNC Symbol;Acc:HGNC:18177]	0.821459
ASB16	ankyrin repeat and SOCS box containing 16 [Source:HGNC Symbol;Acc:HGNC:19768]	0.821367
MPND	MPN domain containing [Source:HGNC Symbol;Acc:HGNC:25934]	0.821164
MPI	mannose phosphate isomerase [Source:HGNC Symbol;Acc:HGNC:7216]	0.821126
LAX1	lymphocyte transmembrane adaptor 1 [Source:HGNC Symbol;Acc:HGNC:26005]	0.821025
IFITM10	interferon induced transmembrane protein 10 [Source:HGNC Symbol;Acc:HGNC:40022]	0.820904
EIF2AK3	eukaryotic translation initiation factor 2 alpha kinase 3 [Source:HGNC Symbol;Acc:HGNC:3255]	0.820498
LRRC75B	leucine rich repeat containing 75B [Source:HGNC Symbol;Acc:HGNC:33155]	0.820419
C12orf29	chromosome 12 open reading frame 29 [Source:HGNC Symbol;Acc:HGNC:25322]	0.820375
DISC1	DISC1 scaffold protein [Source:HGNC Symbol;Acc:HGNC:2888]	0.820326
ZIK1	zinc finger protein interacting with K protein 1 [Source:HGNC Symbol;Acc:HGNC:33104]	0.820219
MED25	mediator complex subunit 25 [Source:HGNC Symbol;Acc:HGNC:28845]	0.820064
FAM114A2	family with sequence similarity 114 member A2 [Source:HGNC Symbol;Acc:HGNC:1333]	0.819714
TMX4	thioredoxin related transmembrane protein 4 [Source:HGNC Symbol;Acc:HGNC:25237]	0.819655
C22orf39	chromosome 22 open reading frame 39 [Source:HGNC Symbol;Acc:HGNC:27012]	0.818507
TMEM44	transmembrane protein 44 [Source:HGNC Symbol;Acc:HGNC:25120]	0.818392
L3HYPDH	trans-L-3-hydroxyproline dehydratase [Source:HGNC Symbol;Acc:HGNC:20488]	0.818156
RNASEH2C	ribonuclease H2 subunit C [Source:HGNC Symbol;Acc:HGNC:24116]	0.818069
CCDC80	coiled-coil domain containing 80 [Source:HGNC Symbol;Acc:HGNC:30649]	0.817616
MERTK	MER proto-oncogene, tyrosine kinase [Source:HGNC Symbol;Acc:HGNC:7027]	0.817435
TRIM32	tripartite motif containing 32 [Source:HGNC Symbol;Acc:HGNC:16380]	0.817341
ADGRE5	adhesion G protein-coupled receptor E5 [Source:HGNC Symbol;Acc:HGNC:1711]	0.8171
HDGFL3	HDGF like 3 [Source:HGNC Symbol;Acc:HGNC:24937]	0.816386
LDHB	lactate dehydrogenase B [Source:HGNC Symbol;Acc:HGNC:6541]	0.816184
ASNS	asparagine synthetase (glutamine-hydrolyzing) [Source:HGNC Symbol;Acc:HGNC:753]	0.815991
PRRC1	proline rich coiled-coil 1 [Source:HGNC Symbol;Acc:HGNC:28164]	0.815889
CTLA4	cytotoxic T-lymphocyte associated protein 4 [Source:HGNC Symbol;Acc:HGNC:2505]	0.81571
ATG101	autophagy related 101 [Source:HGNC Symbol;Acc:HGNC:25679]	0.815618
ACKR3	atypical chemokine receptor 3 [Source:HGNC Symbol;Acc:HGNC:23692]	0.814887
TSPAN9	tetraspanin 9 [Source:HGNC Symbol;Acc:HGNC:21640]	0.814746
PAWR	pro-apoptotic WT1 regulator [Source:HGNC Symbol;Acc:HGNC:8614]	0.814704
DIPK2A	divergent protein kinase domain 2A [Source:HGNC Symbol;Acc:HGNC:28490]	0.814555
B4GALT1	beta-1,4-galactosyltransferase 1 [Source:HGNC Symbol;Acc:HGNC:924]	0.814479
TEAD1	TEA domain transcription factor 1 [Source:HGNC Symbol;Acc:HGNC:11714]	0.813953
PLEKHA7	pleckstrin homology domain containing A7 [Source:HGNC Symbol;Acc:HGNC:27049]	0.813392
VMAC	vimentin type intermediate filament associated coiled-coil protein [Source:HGNC Symbol;Acc:HGNC:33803]	0.813229
MB21D2	Mab-21 domain containing 2 [Source:HGNC Symbol;Acc:HGNC:30438]	0.813203
FITM1	fat storage inducing transmembrane protein 1 [Source:HGNC Symbol;Acc:HGNC:33714]	0.813189
FBXL21P	F-box and leucine rich repeat protein 21, pseudogene [Source:HGNC Symbol;Acc:HGNC:13600]	0.812892
KLF2	Kruppel like factor 2 [Source:HGNC Symbol;Acc:HGNC:6347]	0.812597
PSKH1	protein serine kinase H1 [Source:HGNC Symbol;Acc:HGNC:9529]	0.812142
RB1	RB transcriptional corepressor 1 [Source:HGNC Symbol;Acc:HGNC:9884]	0.811588
RIIAD1	regulatory subunit of type II PKA R-subunit domain containing 1 [Source:HGNC Symbol;Acc:HGNC:26686]	0.811276
RAB42	RAB42, member RAS oncogene family [Source:HGNC Symbol;Acc:HGNC:28702]	0.81119
MST1	macrophage stimulating 1 [Source:HGNC Symbol;Acc:HGNC:7380]	0.811027
DUSP7	dual specificity phosphatase 7 [Source:HGNC Symbol;Acc:HGNC:3073]	0.810419
EML5	EMAP like 5 [Source:HGNC Symbol;Acc:HGNC:18197]	0.809886
SLC35B2	solute carrier family 35 member B2 [Source:HGNC Symbol;Acc:HGNC:16872]	0.809752
ZKSCAN5	zinc finger with KRAB and SCAN domains 5 [Source:HGNC Symbol;Acc:HGNC:12867]	0.809058
AK4	adenylate kinase 4 [Source:HGNC Symbol;Acc:HGNC:363]	0.80901
LURAP1	leucine rich adaptor protein 1 [Source:HGNC Symbol;Acc:HGNC:32327]	0.808861
C20orf27	chromosome 20 open reading frame 27 [Source:HGNC Symbol;Acc:HGNC:15873]	0.807853
L2HGDH	L-2-hydroxyglutarate dehydrogenase [Source:HGNC Symbol;Acc:HGNC:20499]	0.807702
EEF2	eukaryotic translation elongation factor 2 [Source:HGNC Symbol;Acc:HGNC:3214]	0.807438
GCM2	glial cells missing transcription factor 2 [Source:HGNC Symbol;Acc:HGNC:4198]	0.806984
KLHL36	kelch like family member 36 [Source:HGNC Symbol;Acc:HGNC:17844]	0.806904
RUBCNL	rubicon like autophagy enhancer [Source:HGNC Symbol;Acc:HGNC:20420]	0.80655
ARHGEF10	Rho guanine nucleotide exchange factor 10 [Source:HGNC Symbol;Acc:HGNC:14103]	0.806309
TLCD3B	TLC domain containing 3B [Source:HGNC Symbol;Acc:HGNC:25295]	0.806179
KLHL28	kelch like family member 28 [Source:HGNC Symbol;Acc:HGNC:19741]	0.805999
ZKSCAN8	zinc finger with KRAB and SCAN domains 8 [Source:HGNC Symbol;Acc:HGNC:12983]	0.805943
LY6G6E	lymphocyte antigen 6 family member G6E [Source:HGNC Symbol;Acc:HGNC:13934]	0.80533
TNFSF13	TNF superfamily member 13 [Source:HGNC Symbol;Acc:HGNC:11928]	0.805131
TAPT1	transmembrane anterior posterior transformation 1 [Source:HGNC Symbol;Acc:HGNC:26887]	0.804954
CHAD	chondroadherin [Source:HGNC Symbol;Acc:HGNC:1909]	0.804872
UROD	uroporphyrinogen decarboxylase [Source:HGNC Symbol;Acc:HGNC:12591]	0.804834
TRIO	trio Rho guanine nucleotide exchange factor [Source:HGNC Symbol;Acc:HGNC:12303]	0.80458
EIF2AK4	eukaryotic translation initiation factor 2 alpha kinase 4 [Source:HGNC Symbol;Acc:HGNC:19687]	0.804553
CD2	CD2 molecule [Source:HGNC Symbol;Acc:HGNC:1639]	0.804043
BRF2	BRF2 RNA polymerase III transcription initiation factor subunit [Source:HGNC Symbol;Acc:HGNC:17298]	0.803742
WDR59	WD repeat domain 59 [Source:HGNC Symbol;Acc:HGNC:25706]	0.802442
PAG1	phosphoprotein membrane anchor with glycosphingolipid microdomains 1 [Source:HGNC Symbol;Acc:HGNC:30043]	0.801458
SLC25A2	solute carrier family 25 member 2 [Source:HGNC Symbol;Acc:HGNC:22921]	0.800314
TMEM89	transmembrane protein 89 [Source:HGNC Symbol;Acc:HGNC:32372]	0.800007
PLCB3	phospholipase C beta 3 [Source:HGNC Symbol;Acc:HGNC:9056]	0.79985
RPL14	ribosomal protein L14 [Source:HGNC Symbol;Acc:HGNC:10305]	0.799562
SFT2D2	SFT2 domain containing 2 [Source:HGNC Symbol;Acc:HGNC:25140]	0.799433
RXRA	retinoid X receptor alpha [Source:HGNC Symbol;Acc:HGNC:10477]	0.798695
GLT8D1	glycosyltransferase 8 domain containing 1 [Source:HGNC Symbol;Acc:HGNC:24870]	0.798606
MAP3K2	mitogen-activated protein kinase kinase kinase 2 [Source:HGNC Symbol;Acc:HGNC:6854]	0.797698
CWF19L2	CWF19 like cell cycle control factor 2 [Source:HGNC Symbol;Acc:HGNC:26508]	0.797609
MMP19	matrix metallopeptidase 19 [Source:HGNC Symbol;Acc:HGNC:7165]	0.797253
ABHD8	abhydrolase domain containing 8 [Source:HGNC Symbol;Acc:HGNC:23759]	0.796967
SLC44A2	solute carrier family 44 member 2 [Source:HGNC Symbol;Acc:HGNC:17292]	0.796511
LRSAM1	leucine rich repeat and sterile alpha motif containing 1 [Source:HGNC Symbol;Acc:HGNC:25135]	0.796031
SH3D19	SH3 domain containing 19 [Source:HGNC Symbol;Acc:HGNC:30418]	0.795715
RIBC1	RIB43A domain with coiled-coils 1 [Source:HGNC Symbol;Acc:HGNC:26537]	0.795567
EGF	epidermal growth factor [Source:HGNC Symbol;Acc:HGNC:3229]	0.795152
FKBP9	FKBP prolyl isomerase 9 [Source:HGNC Symbol;Acc:HGNC:3725]	0.795082
GRAMD2A	GRAM domain containing 2A [Source:HGNC Symbol;Acc:HGNC:27287]	0.794902
COL8A1	collagen type VIII alpha 1 chain [Source:HGNC Symbol;Acc:HGNC:2215]	0.794877
TM9SF3	transmembrane 9 superfamily member 3 [Source:HGNC Symbol;Acc:HGNC:21529]	0.79309
WWC2	WW and C2 domain containing 2 [Source:HGNC Symbol;Acc:HGNC:24148]	0.793075
MACROH2A1	macroH2A.1 histone [Source:HGNC Symbol;Acc:HGNC:4740]	0.79289
SERPINE3	serpin family E member 3 [Source:HGNC Symbol;Acc:HGNC:24774]	0.792699
PTCH1	patched 1 [Source:HGNC Symbol;Acc:HGNC:9585]	0.79262
RTL9	retrotransposon Gag like 9 [Source:HGNC Symbol;Acc:HGNC:29245]	0.792532
LRRC69	leucine rich repeat containing 69 [Source:HGNC Symbol;Acc:HGNC:34303]	0.792492
PDE7A	phosphodiesterase 7A [Source:HGNC Symbol;Acc:HGNC:8791]	0.792447
KDM1A	lysine demethylase 1A [Source:HGNC Symbol;Acc:HGNC:29079]	0.792277
PIK3IP1	phosphoinositide-3-kinase interacting protein 1 [Source:HGNC Symbol;Acc:HGNC:24942]	0.791481
MAOB	monoamine oxidase B [Source:HGNC Symbol;Acc:HGNC:6834]	0.791268
KBTBD11	kelch repeat and BTB domain containing 11 [Source:HGNC Symbol;Acc:HGNC:29104]	0.791251
GPD1L	glycerol-3-phosphate dehydrogenase 1 like [Source:HGNC Symbol;Acc:HGNC:28956]	0.790976
PP2D1	protein phosphatase 2C like domain containing 1 [Source:HGNC Symbol;Acc:HGNC:28406]	0.790498
AP1S2	adaptor related protein complex 1 subunit sigma 2 [Source:HGNC Symbol;Acc:HGNC:560]	0.790397
VEGFB	vascular endothelial growth factor B [Source:HGNC Symbol;Acc:HGNC:12681]	0.789847
ZNF655	zinc finger protein 655 [Source:HGNC Symbol;Acc:HGNC:30899]	0.789798
STK32C	serine/threonine kinase 32C [Source:HGNC Symbol;Acc:HGNC:21332]	0.789604
SLC12A6	solute carrier family 12 member 6 [Source:HGNC Symbol;Acc:HGNC:10914]	0.789223
FUT11	fucosyltransferase 11 [Source:HGNC Symbol;Acc:HGNC:19233]	0.789118
ARMCX1	armadillo repeat containing X-linked 1 [Source:HGNC Symbol;Acc:HGNC:18073]	0.788725
KLF1	Kruppel like factor 1 [Source:HGNC Symbol;Acc:HGNC:6345]	0.787926
PNPO	pyridoxamine 5'-phosphate oxidase [Source:HGNC Symbol;Acc:HGNC:30260]	0.787906
NRARP	NOTCH regulated ankyrin repeat protein [Source:HGNC Symbol;Acc:HGNC:33843]	0.78764
PLCL1	phospholipase C like 1 (inactive) [Source:HGNC Symbol;Acc:HGNC:9063]	0.787607
CPA2	carboxypeptidase A2 [Source:HGNC Symbol;Acc:HGNC:2297]	0.787532
UBXN2B	UBX domain protein 2B [Source:HGNC Symbol;Acc:HGNC:27035]	0.787328
TFB1M	transcription factor B1, mitochondrial [Source:HGNC Symbol;Acc:HGNC:17037]	0.787297
NELFB	negative elongation factor complex member B [Source:HGNC Symbol;Acc:HGNC:24324]	0.787126
PIK3R2	phosphoinositide-3-kinase regulatory subunit 2 [Source:HGNC Symbol;Acc:HGNC:8980]	0.786824
JRKL	JRK like [Source:HGNC Symbol;Acc:HGNC:6200]	0.786134
MIA3	MIA SH3 domain ER export factor 3 [Source:HGNC Symbol;Acc:HGNC:24008]	0.785452
RPL34	ribosomal protein L34 [Source:HGNC Symbol;Acc:HGNC:10340]	0.784883
AGER	advanced glycosylation end-product specific receptor [Source:HGNC Symbol;Acc:HGNC:320]	0.784604
RPL27	ribosomal protein L27 [Source:HGNC Symbol;Acc:HGNC:10328]	0.784494
RFX2	regulatory factor X2 [Source:HGNC Symbol;Acc:HGNC:9983]	0.784236
FUCA2	alpha-L-fucosidase 2 [Source:HGNC Symbol;Acc:HGNC:4008]	0.783929
ZNF679	zinc finger protein 679 [Source:HGNC Symbol;Acc:HGNC:28650]	0.783609
RBM11	RNA binding motif protein 11 [Source:HGNC Symbol;Acc:HGNC:9897]	0.782891
GANC	glucosidase alpha, neutral C [Source:HGNC Symbol;Acc:HGNC:4139]	0.782841
CTSB	cathepsin B [Source:HGNC Symbol;Acc:HGNC:2527]	0.782677
HARS2	histidyl-tRNA synthetase 2, mitochondrial [Source:HGNC Symbol;Acc:HGNC:4817]	0.782059
NUDT18	nudix hydrolase 18 [Source:HGNC Symbol;Acc:HGNC:26194]	0.781964
NSMCE1	NSE1 homolog, SMC5-SMC6 complex component [Source:HGNC Symbol;Acc:HGNC:29897]	0.781871
ZNF451	zinc finger protein 451 [Source:HGNC Symbol;Acc:HGNC:21091]	0.781824
KLHL5	kelch like family member 5 [Source:HGNC Symbol;Acc:HGNC:6356]	0.781689
CCNY	cyclin Y [Source:HGNC Symbol;Acc:HGNC:23354]	0.781571
SLC41A1	solute carrier family 41 member 1 [Source:HGNC Symbol;Acc:HGNC:19429]	0.78118
SLC14A1	solute carrier family 14 member 1 (Kidd blood group) [Source:HGNC Symbol;Acc:HGNC:10918]	0.781064
SFRP1	secreted frizzled related protein 1 [Source:HGNC Symbol;Acc:HGNC:10776]	0.780905
INSIG1	insulin induced gene 1 [Source:HGNC Symbol;Acc:HGNC:6083]	0.780623
NRTN	neurturin [Source:HGNC Symbol;Acc:HGNC:8007]	0.78062
RPL13A	ribosomal protein L13a [Source:HGNC Symbol;Acc:HGNC:10304]	0.780087
ENO1	enolase 1 [Source:HGNC Symbol;Acc:HGNC:3350]	0.779821
RAP1B	RAP1B, member of RAS oncogene family [Source:HGNC Symbol;Acc:HGNC:9857]	0.779299
TMED3	transmembrane p24 trafficking protein 3 [Source:HGNC Symbol;Acc:HGNC:28889]	0.778872
TP53INP1	tumor protein p53 inducible nuclear protein 1 [Source:HGNC Symbol;Acc:HGNC:18022]	0.77884
OSBP	oxysterol binding protein [Source:HGNC Symbol;Acc:HGNC:8503]	0.778379
PPP1R21	protein phosphatase 1 regulatory subunit 21 [Source:HGNC Symbol;Acc:HGNC:30595]	0.778283
SDCBP	syndecan binding protein [Source:HGNC Symbol;Acc:HGNC:10662]	0.778282
TMEM220	transmembrane protein 220 [Source:HGNC Symbol;Acc:HGNC:33757]	0.777526
KIAA0100	KIAA0100 [Source:HGNC Symbol;Acc:HGNC:28960]	0.777264
TAS1R1	taste 1 receptor member 1 [Source:HGNC Symbol;Acc:HGNC:14448]	0.777171
GCNT1	glucosaminyl (N-acetyl) transferase 1 [Source:HGNC Symbol;Acc:HGNC:4203]	0.777102
ZNF398	zinc finger protein 398 [Source:HGNC Symbol;Acc:HGNC:18373]	0.777005
RPS6KA5	ribosomal protein S6 kinase A5 [Source:HGNC Symbol;Acc:HGNC:10434]	0.776687
MPP5	membrane palmitoylated protein 5 [Source:HGNC Symbol;Acc:HGNC:18669]	0.776571
LNPEP	leucyl and cystinyl aminopeptidase [Source:HGNC Symbol;Acc:HGNC:6656]	0.776565
LTB4R2	leukotriene B4 receptor 2 [Source:HGNC Symbol;Acc:HGNC:19260]	0.776469
DHX36	DEAH-box helicase 36 [Source:HGNC Symbol;Acc:HGNC:14410]	0.776461
LOXL3	lysyl oxidase like 3 [Source:HGNC Symbol;Acc:HGNC:13869]	0.776147
EVI5L	ecotropic viral integration site 5 like [Source:HGNC Symbol;Acc:HGNC:30464]	0.775906
DLEC1	DLEC1 cilia and flagella associated protein [Source:HGNC Symbol;Acc:HGNC:2899]	0.775694
SLC39A8	solute carrier family 39 member 8 [Source:HGNC Symbol;Acc:HGNC:20862]	0.774768
ZC3H11A	zinc finger CCCH-type containing 11A [Source:HGNC Symbol;Acc:HGNC:29093]	0.774533
FGGY	FGGY carbohydrate kinase domain containing [Source:HGNC Symbol;Acc:HGNC:25610]	0.774512
CPSF4L	cleavage and polyadenylation specific factor 4 like [Source:HGNC Symbol;Acc:HGNC:33632]	0.77447
ZNF260	zinc finger protein 260 [Source:HGNC Symbol;Acc:HGNC:13499]	0.773759
SREK1IP1	SREK1 interacting protein 1 [Source:HGNC Symbol;Acc:HGNC:26716]	0.773095
METTL15	methyltransferase like 15 [Source:HGNC Symbol;Acc:HGNC:26606]	0.772888
MARCKS	myristoylated alanine rich protein kinase C substrate [Source:HGNC Symbol;Acc:HGNC:6759]	0.772522
SERPINC1	serpin family C member 1 [Source:HGNC Symbol;Acc:HGNC:775]	0.772438
IGF1R	insulin like growth factor 1 receptor [Source:HGNC Symbol;Acc:HGNC:5465]	0.771922
TMEM177	transmembrane protein 177 [Source:HGNC Symbol;Acc:HGNC:28143]	0.77142
ESPNL	espin like [Source:HGNC Symbol;Acc:HGNC:27937]	0.771004
HYKK	hydroxylysine kinase [Source:HGNC Symbol;Acc:HGNC:34403]	0.770247
FOXO1	forkhead box O1 [Source:HGNC Symbol;Acc:HGNC:3819]	0.770124
PAFAH1B2	platelet activating factor acetylhydrolase 1b catalytic subunit 2 [Source:HGNC Symbol;Acc:HGNC:8575]	0.769727
MPZL3	myelin protein zero like 3 [Source:HGNC Symbol;Acc:HGNC:27279]	0.769718
NVL	nuclear VCP like [Source:HGNC Symbol;Acc:HGNC:8070]	0.769696
TMEM159	transmembrane protein 159 [Source:HGNC Symbol;Acc:HGNC:30136]	0.769434
FAM131C	family with sequence similarity 131 member C [Source:HGNC Symbol;Acc:HGNC:26717]	0.769354
SPIN1	spindlin 1 [Source:HGNC Symbol;Acc:HGNC:11243]	0.769214
TALDO1	transaldolase 1 [Source:HGNC Symbol;Acc:HGNC:11559]	0.769059
NUAK1	NUAK family kinase 1 [Source:HGNC Symbol;Acc:HGNC:14311]	0.769053
AGT	angiotensinogen [Source:HGNC Symbol;Acc:HGNC:333]	0.769017
FBXO10	F-box protein 10 [Source:HGNC Symbol;Acc:HGNC:13589]	0.767969
ENC1	ectodermal-neural cortex 1 [Source:HGNC Symbol;Acc:HGNC:3345]	0.767885
ACOT4	acyl-CoA thioesterase 4 [Source:HGNC Symbol;Acc:HGNC:19748]	0.767316
PJA2	praja ring finger ubiquitin ligase 2 [Source:HGNC Symbol;Acc:HGNC:17481]	0.767241
RPL26	ribosomal protein L26 [Source:HGNC Symbol;Acc:HGNC:10327]	0.767222
LIME1	Lck interacting transmembrane adaptor 1 [Source:HGNC Symbol;Acc:HGNC:26016]	0.767173
CYB5D2	cytochrome b5 domain containing 2 [Source:HGNC Symbol;Acc:HGNC:28471]	0.7669
DPY19L1	dpy-19 like C-mannosyltransferase 1 [Source:HGNC Symbol;Acc:HGNC:22205]	0.766737
PLCB1	phospholipase C beta 1 [Source:HGNC Symbol;Acc:HGNC:15917]	0.766626
MEIOB	meiosis specific with OB-fold [Source:HGNC Symbol;Acc:HGNC:28569]	0.766353
MEX3A	mex-3 RNA binding family member A [Source:HGNC Symbol;Acc:HGNC:33482]	0.766
ZFHX2	zinc finger homeobox 2 [Source:HGNC Symbol;Acc:HGNC:20152]	0.765933
ZNF780B	zinc finger protein 780B [Source:HGNC Symbol;Acc:HGNC:33109]	0.765512
RABL2B	RAB, member of RAS oncogene family like 2B [Source:HGNC Symbol;Acc:HGNC:9800]	0.76534
ITM2C	integral membrane protein 2C [Source:HGNC Symbol;Acc:HGNC:6175]	0.765147
PRXL2C	peroxiredoxin like 2C [Source:HGNC Symbol;Acc:HGNC:16881]	0.764911
CHP1	calcineurin like EF-hand protein 1 [Source:HGNC Symbol;Acc:HGNC:17433]	0.764741
GSTM2	glutathione S-transferase mu 2 [Source:HGNC Symbol;Acc:HGNC:4634]	0.764351
FGF1	fibroblast growth factor 1 [Source:HGNC Symbol;Acc:HGNC:3665]	0.76414
CDC37L1	cell division cycle 37 like 1 [Source:HGNC Symbol;Acc:HGNC:17179]	0.763874
ZBTB6	zinc finger and BTB domain containing 6 [Source:HGNC Symbol;Acc:HGNC:16764]	0.76349
ELMOD2	ELMO domain containing 2 [Source:HGNC Symbol;Acc:HGNC:28111]	0.76324
UBE2H	ubiquitin conjugating enzyme E2 H [Source:HGNC Symbol;Acc:HGNC:12484]	0.763175
ZNF736	zinc finger protein 736 [Source:HGNC Symbol;Acc:HGNC:32467]	0.763136
ARHGAP24	Rho GTPase activating protein 24 [Source:HGNC Symbol;Acc:HGNC:25361]	0.762544
KIF21A	kinesin family member 21A [Source:HGNC Symbol;Acc:HGNC:19349]	0.761417
LARS2	leucyl-tRNA synthetase 2, mitochondrial [Source:HGNC Symbol;Acc:HGNC:17095]	0.761241
SGCE	sarcoglycan epsilon [Source:HGNC Symbol;Acc:HGNC:10808]	0.761108
THAP3	THAP domain containing 3 [Source:HGNC Symbol;Acc:HGNC:20855]	0.76104
SSR1	signal sequence receptor subunit 1 [Source:HGNC Symbol;Acc:HGNC:11323]	0.760992
MORN1	MORN repeat containing 1 [Source:HGNC Symbol;Acc:HGNC:25852]	0.760976
JOSD1	Josephin domain containing 1 [Source:HGNC Symbol;Acc:HGNC:28953]	0.7606
SNX17	sorting nexin 17 [Source:HGNC Symbol;Acc:HGNC:14979]	0.760594
SH3BGR	SH3 domain binding glutamate rich protein [Source:HGNC Symbol;Acc:HGNC:10822]	0.760393
KANK2	KN motif and ankyrin repeat domains 2 [Source:HGNC Symbol;Acc:HGNC:29300]	0.760234
ALKBH5	alkB homolog 5, RNA demethylase [Source:HGNC Symbol;Acc:HGNC:25996]	0.75996
CCDC66	coiled-coil domain containing 66 [Source:HGNC Symbol;Acc:HGNC:27709]	0.75991
CEP97	centrosomal protein 97 [Source:HGNC Symbol;Acc:HGNC:26244]	0.759897
ARL9	ADP ribosylation factor like GTPase 9 [Source:HGNC Symbol;Acc:HGNC:23592]	0.759637
CYP4F3	cytochrome P450 family 4 subfamily F member 3 [Source:HGNC Symbol;Acc:HGNC:2646]	0.758994
ZNF383	zinc finger protein 383 [Source:HGNC Symbol;Acc:HGNC:18609]	0.758781
LTB4R	leukotriene B4 receptor [Source:HGNC Symbol;Acc:HGNC:6713]	0.758288
RNF150	ring finger protein 150 [Source:HGNC Symbol;Acc:HGNC:23138]	0.758282
OGT	O-linked N-acetylglucosamine (GlcNAc) transferase [Source:HGNC Symbol;Acc:HGNC:8127]	0.757865
ARL4D	ADP ribosylation factor like GTPase 4D [Source:HGNC Symbol;Acc:HGNC:656]	0.757739
ANKRD10	ankyrin repeat domain 10 [Source:HGNC Symbol;Acc:HGNC:20265]	0.757386
NGLY1	N-glycanase 1 [Source:HGNC Symbol;Acc:HGNC:17646]	0.757224
SLC36A4	solute carrier family 36 member 4 [Source:HGNC Symbol;Acc:HGNC:19660]	0.757147
ASB13	ankyrin repeat and SOCS box containing 13 [Source:HGNC Symbol;Acc:HGNC:19765]	0.756071
ARID3A	AT-rich interaction domain 3A [Source:HGNC Symbol;Acc:HGNC:3031]	0.755867
UBE2W	ubiquitin conjugating enzyme E2 W [Source:HGNC Symbol;Acc:HGNC:25616]	0.755531
DGCR6L	DiGeorge syndrome critical region gene 6 like [Source:HGNC Symbol;Acc:HGNC:18551]	0.754577
CAPN3	calpain 3 [Source:HGNC Symbol;Acc:HGNC:1480]	0.754494
C1orf116	chromosome 1 open reading frame 116 [Source:HGNC Symbol;Acc:HGNC:28667]	0.754377
ASCC1	activating signal cointegrator 1 complex subunit 1 [Source:HGNC Symbol;Acc:HGNC:24268]	0.753759
PDK2	pyruvate dehydrogenase kinase 2 [Source:HGNC Symbol;Acc:HGNC:8810]	0.753554
HNRNPLL	heterogeneous nuclear ribonucleoprotein L like [Source:HGNC Symbol;Acc:HGNC:25127]	0.753353
PHYH	phytanoyl-CoA 2-hydroxylase [Source:HGNC Symbol;Acc:HGNC:8940]	0.752634
LTBP2	latent transforming growth factor beta binding protein 2 [Source:HGNC Symbol;Acc:HGNC:6715]	0.752488
MT-TH	mitochondrially encoded tRNA-His (CAU/C) [Source:HGNC Symbol;Acc:HGNC:7487]	0.752049
OARD1	O-acyl-ADP-ribose deacylase 1 [Source:HGNC Symbol;Acc:HGNC:21257]	0.751999
HDHD3	haloacid dehalogenase like hydrolase domain containing 3 [Source:HGNC Symbol;Acc:HGNC:28171]	0.75187
PIGB	phosphatidylinositol glycan anchor biosynthesis class B [Source:HGNC Symbol;Acc:HGNC:8959]	0.751765
GHRL	ghrelin and obestatin prepropeptide [Source:HGNC Symbol;Acc:HGNC:18129]	0.751262
DENND6A	DENN domain containing 6A [Source:HGNC Symbol;Acc:HGNC:26635]	0.751075
ZNF496	zinc finger protein 496 [Source:HGNC Symbol;Acc:HGNC:23713]	0.750637
PHYHIP	phytanoyl-CoA 2-hydroxylase interacting protein [Source:HGNC Symbol;Acc:HGNC:16865]	0.750555
ARFGAP3	ADP ribosylation factor GTPase activating protein 3 [Source:HGNC Symbol;Acc:HGNC:661]	0.750542
ABHD13	abhydrolase domain containing 13 [Source:HGNC Symbol;Acc:HGNC:20293]	0.750261
CMTM8	CKLF like MARVEL transmembrane domain containing 8 [Source:HGNC Symbol;Acc:HGNC:19179]	0.749851
NSMAF	neutral sphingomyelinase activation associated factor [Source:HGNC Symbol;Acc:HGNC:8017]	0.749677
RMND5A	required for meiotic nuclear division 5 homolog A [Source:HGNC Symbol;Acc:HGNC:25850]	0.749538
ARHGEF4	Rho guanine nucleotide exchange factor 4 [Source:HGNC Symbol;Acc:HGNC:684]	0.749354
DCST1	DC-STAMP domain containing 1 [Source:HGNC Symbol;Acc:HGNC:26539]	0.749211
AMDHD2	amidohydrolase domain containing 2 [Source:HGNC Symbol;Acc:HGNC:24262]	0.749183
EGFL7	EGF like domain multiple 7 [Source:HGNC Symbol;Acc:HGNC:20594]	0.74822
RNF169	ring finger protein 169 [Source:HGNC Symbol;Acc:HGNC:26961]	0.747686
CD164	CD164 molecule [Source:HGNC Symbol;Acc:HGNC:1632]	0.747638
TWNK	twinkle mtDNA helicase [Source:HGNC Symbol;Acc:HGNC:1160]	0.747409
MAML2	mastermind like transcriptional coactivator 2 [Source:HGNC Symbol;Acc:HGNC:16259]	0.747314
FEZ2	fasciculation and elongation protein zeta 2 [Source:HGNC Symbol;Acc:HGNC:3660]	0.747255
RNF10	ring finger protein 10 [Source:HGNC Symbol;Acc:HGNC:10055]	0.747157
SARAF	store-operated calcium entry associated regulatory factor [Source:HGNC Symbol;Acc:HGNC:28789]	0.747156
BRAT1	BRCA1 associated ATM activator 1 [Source:HGNC Symbol;Acc:HGNC:21701]	0.746846
TAGLN	transgelin [Source:HGNC Symbol;Acc:HGNC:11553]	0.746317
SH3BGRL	SH3 domain binding glutamate rich protein like [Source:HGNC Symbol;Acc:HGNC:10823]	0.745657
SUFU	SUFU negative regulator of hedgehog signaling [Source:HGNC Symbol;Acc:HGNC:16466]	0.745406
SIAH1	siah E3 ubiquitin protein ligase 1 [Source:HGNC Symbol;Acc:HGNC:10857]	0.745293
TOMM20	translocase of outer mitochondrial membrane 20 [Source:HGNC Symbol;Acc:HGNC:20947]	0.745051
LRRIQ3	leucine rich repeats and IQ motif containing 3 [Source:HGNC Symbol;Acc:HGNC:28318]	0.744865
SNX25	sorting nexin 25 [Source:HGNC Symbol;Acc:HGNC:21883]	0.744822
SIGLECL1	SIGLEC family like 1 [Source:HGNC Symbol;Acc:HGNC:26856]	0.744543
HSPA12A	heat shock protein family A (Hsp70) member 12A [Source:HGNC Symbol;Acc:HGNC:19022]	0.744459
LYSMD3	LysM domain containing 3 [Source:HGNC Symbol;Acc:HGNC:26969]	0.744273
KIAA0040	KIAA0040 [Source:HGNC Symbol;Acc:HGNC:28950]	0.744011
AFAP1	actin filament associated protein 1 [Source:HGNC Symbol;Acc:HGNC:24017]	0.743514
MAPK4	mitogen-activated protein kinase 4 [Source:HGNC Symbol;Acc:HGNC:6878]	0.743271
SRR	serine racemase [Source:HGNC Symbol;Acc:HGNC:14398]	0.743264
POLK	DNA polymerase kappa [Source:HGNC Symbol;Acc:HGNC:9183]	0.743258
CASD1	CAS1 domain containing 1 [Source:HGNC Symbol;Acc:HGNC:16014]	0.743002
PHF20	PHD finger protein 20 [Source:HGNC Symbol;Acc:HGNC:16098]	0.742584
DYNC2LI1	dynein cytoplasmic 2 light intermediate chain 1 [Source:HGNC Symbol;Acc:HGNC:24595]	0.742575
CPXM1	carboxypeptidase X, M14 family member 1 [Source:HGNC Symbol;Acc:HGNC:15771]	0.742438
SAAL1	serum amyloid A like 1 [Source:HGNC Symbol;Acc:HGNC:25158]	0.741591
CSNK2A1	casein kinase 2 alpha 1 [Source:HGNC Symbol;Acc:HGNC:2457]	0.741415
ASRGL1	asparaginase and isoaspartyl peptidase 1 [Source:HGNC Symbol;Acc:HGNC:16448]	0.740767
BPGM	bisphosphoglycerate mutase [Source:HGNC Symbol;Acc:HGNC:1093]	0.740519
LAMA4	laminin subunit alpha 4 [Source:HGNC Symbol;Acc:HGNC:6484]	0.739882
SPAG6	sperm associated antigen 6 [Source:HGNC Symbol;Acc:HGNC:11215]	0.739807
RORA	RAR related orphan receptor A [Source:HGNC Symbol;Acc:HGNC:10258]	0.739598
MEX3D	mex-3 RNA binding family member D [Source:HGNC Symbol;Acc:HGNC:16734]	0.73934
ZNF267	zinc finger protein 267 [Source:HGNC Symbol;Acc:HGNC:13060]	0.73876
AKT1	AKT serine/threonine kinase 1 [Source:HGNC Symbol;Acc:HGNC:391]	0.738607
PFKL	phosphofructokinase, liver type [Source:HGNC Symbol;Acc:HGNC:8876]	0.73772
ABCB9	ATP binding cassette subfamily B member 9 [Source:HGNC Symbol;Acc:HGNC:50]	0.737642
YTHDC2	YTH domain containing 2 [Source:HGNC Symbol;Acc:HGNC:24721]	0.737587
CTDSP2	CTD small phosphatase 2 [Source:HGNC Symbol;Acc:HGNC:17077]	0.737304
PACSIN3	protein kinase C and casein kinase substrate in neurons 3 [Source:HGNC Symbol;Acc:HGNC:8572]	0.737004
ESR1	estrogen receptor 1 [Source:HGNC Symbol;Acc:HGNC:3467]	0.736887
RTL8B	retrotransposon Gag like 8B [Source:HGNC Symbol;Acc:HGNC:33156]	0.735885
ZNF322	zinc finger protein 322 [Source:HGNC Symbol;Acc:HGNC:23640]	0.735778
FMNL2	formin like 2 [Source:HGNC Symbol;Acc:HGNC:18267]	0.735724
ABTB1	ankyrin repeat and BTB domain containing 1 [Source:HGNC Symbol;Acc:HGNC:18275]	0.735583
ACACB	acetyl-CoA carboxylase beta [Source:HGNC Symbol;Acc:HGNC:85]	0.73558
SEMA6B	semaphorin 6B [Source:HGNC Symbol;Acc:HGNC:10739]	0.735467
ALS2CL	ALS2 C-terminal like [Source:HGNC Symbol;Acc:HGNC:20605]	0.735422
BTLA	B and T lymphocyte associated [Source:HGNC Symbol;Acc:HGNC:21087]	0.735169
REPIN1	replication initiator 1 [Source:HGNC Symbol;Acc:HGNC:17922]	0.735058
FLYWCH1	FLYWCH-type zinc finger 1 [Source:HGNC Symbol;Acc:HGNC:25404]	0.734946
MIR215	microRNA 215 [Source:HGNC Symbol;Acc:HGNC:31592]	0.734566
DCAF5	DDB1 and CUL4 associated factor 5 [Source:HGNC Symbol;Acc:HGNC:20224]	0.73446
PLGRKT	plasminogen receptor with a C-terminal lysine [Source:HGNC Symbol;Acc:HGNC:23633]	0.73443
OSBPL9	oxysterol binding protein like 9 [Source:HGNC Symbol;Acc:HGNC:16386]	0.734272
B3GNTL1	UDP-GlcNAc:betaGal beta-1,3-N-acetylglucosaminyltransferase like 1 [Source:HGNC Symbol;Acc:HGNC:21727]	0.734223
SHF	Src homology 2 domain containing F [Source:HGNC Symbol;Acc:HGNC:25116]	0.733865
TECPR1	tectonin beta-propeller repeat containing 1 [Source:HGNC Symbol;Acc:HGNC:22214]	0.733761
EML1	EMAP like 1 [Source:HGNC Symbol;Acc:HGNC:3330]	0.733634
MEGF6	multiple EGF like domains 6 [Source:HGNC Symbol;Acc:HGNC:3232]	0.733428
DMXL1	Dmx like 1 [Source:HGNC Symbol;Acc:HGNC:2937]	0.733403
TGFBR3L	transforming growth factor beta receptor 3 like [Source:HGNC Symbol;Acc:HGNC:44152]	0.733351
HMG20A	high mobility group 20A [Source:HGNC Symbol;Acc:HGNC:5001]	0.733284
UNC45A	unc-45 myosin chaperone A [Source:HGNC Symbol;Acc:HGNC:30594]	0.732839
B4GALNT4	beta-1,4-N-acetyl-galactosaminyltransferase 4 [Source:HGNC Symbol;Acc:HGNC:26315]	0.732662
RPL21	ribosomal protein L21 [Source:HGNC Symbol;Acc:HGNC:10313]	0.732657
LRRC14	leucine rich repeat containing 14 [Source:HGNC Symbol;Acc:HGNC:20419]	0.731814
GPR179	G protein-coupled receptor 179 [Source:HGNC Symbol;Acc:HGNC:31371]	0.731501
EVA1A	eva-1 homolog A, regulator of programmed cell death [Source:HGNC Symbol;Acc:HGNC:25816]	0.731445
ADRB1	adrenoceptor beta 1 [Source:HGNC Symbol;Acc:HGNC:285]	0.731389
CHASERR	CHD2 adjacent suppressive regulatory RNA [Source:HGNC Symbol;Acc:HGNC:48626]	0.731312
GSPT2	G1 to S phase transition 2 [Source:HGNC Symbol;Acc:HGNC:4622]	0.731146
AIPL1	aryl hydrocarbon receptor interacting protein like 1 [Source:HGNC Symbol;Acc:HGNC:359]	0.731007
RASGRP1	RAS guanyl releasing protein 1 [Source:HGNC Symbol;Acc:HGNC:9878]	0.73097
MZT1	mitotic spindle organizing protein 1 [Source:HGNC Symbol;Acc:HGNC:33830]	0.730459
GPR182	G protein-coupled receptor 182 [Source:HGNC Symbol;Acc:HGNC:13708]	0.730266
STARD4	StAR related lipid transfer domain containing 4 [Source:HGNC Symbol;Acc:HGNC:18058]	0.730226
EFHC1	EF-hand domain containing 1 [Source:HGNC Symbol;Acc:HGNC:16406]	0.730135
TMPRSS4	transmembrane serine protease 4 [Source:HGNC Symbol;Acc:HGNC:11878]	0.730044
RNF208	ring finger protein 208 [Source:HGNC Symbol;Acc:HGNC:25420]	0.730016
ATL1	atlastin GTPase 1 [Source:HGNC Symbol;Acc:HGNC:11231]	0.729335
THBS3	thrombospondin 3 [Source:HGNC Symbol;Acc:HGNC:11787]	0.729252
DDAH1	dimethylarginine dimethylaminohydrolase 1 [Source:HGNC Symbol;Acc:HGNC:2715]	0.727922
DNAJC10	DnaJ heat shock protein family (Hsp40) member C10 [Source:HGNC Symbol;Acc:HGNC:24637]	0.72725
DYNC1LI2	dynein cytoplasmic 1 light intermediate chain 2 [Source:HGNC Symbol;Acc:HGNC:2966]	0.727161
ZFAND4	zinc finger AN1-type containing 4 [Source:HGNC Symbol;Acc:HGNC:23504]	0.726777
SNHG9	small nucleolar RNA host gene 9 [Source:HGNC Symbol;Acc:HGNC:33102]	0.726507
NFATC4	nuclear factor of activated T cells 4 [Source:HGNC Symbol;Acc:HGNC:7778]	0.726111
CR2	complement C3d receptor 2 [Source:HGNC Symbol;Acc:HGNC:2336]	0.725363
TOGARAM1	TOG array regulator of axonemal microtubules 1 [Source:HGNC Symbol;Acc:HGNC:19959]	0.725257
CCPG1	cell cycle progression 1 [Source:HGNC Symbol;Acc:HGNC:24227]	0.725143
PPFIA4	PTPRF interacting protein alpha 4 [Source:HGNC Symbol;Acc:HGNC:9248]	0.724909
KAZN	kazrin, periplakin interacting protein [Source:HGNC Symbol;Acc:HGNC:29173]	0.724666
ALG11	ALG11 alpha-1,2-mannosyltransferase [Source:HGNC Symbol;Acc:HGNC:32456]	0.724581
TGOLN2	trans-golgi network protein 2 [Source:HGNC Symbol;Acc:HGNC:15450]	0.723946
ADAM1B	ADAM metallopeptidase domain 1B (pseudogene) [Source:HGNC Symbol;Acc:HGNC:44366]	0.723802
UCK1	uridine-cytidine kinase 1 [Source:HGNC Symbol;Acc:HGNC:14859]	0.723663
FBXO45	F-box protein 45 [Source:HGNC Symbol;Acc:HGNC:29148]	0.723356
LGALS4	galectin 4 [Source:HGNC Symbol;Acc:HGNC:6565]	0.723209
MSR1	macrophage scavenger receptor 1 [Source:HGNC Symbol;Acc:HGNC:7376]	0.723134
CDNF	cerebral dopamine neurotrophic factor [Source:HGNC Symbol;Acc:HGNC:24913]	0.722973
TMEM63C	transmembrane protein 63C [Source:HGNC Symbol;Acc:HGNC:23787]	0.722828
TMEM8B	transmembrane protein 8B [Source:HGNC Symbol;Acc:HGNC:21427]	0.722564
KIDINS220	kinase D interacting substrate 220 [Source:HGNC Symbol;Acc:HGNC:29508]	0.722023
GYG1	glycogenin 1 [Source:HGNC Symbol;Acc:HGNC:4699]	0.721984
PGPEP1	pyroglutamyl-peptidase I [Source:HGNC Symbol;Acc:HGNC:13568]	0.721952
TRPM5	transient receptor potential cation channel subfamily M member 5 [Source:HGNC Symbol;Acc:HGNC:14323]	0.721926
DGKG	diacylglycerol kinase gamma [Source:HGNC Symbol;Acc:HGNC:2853]	0.721202
SEMA3B	semaphorin 3B [Source:HGNC Symbol;Acc:HGNC:10724]	0.721154
FOLR1	folate receptor alpha [Source:HGNC Symbol;Acc:HGNC:3791]	0.721099
ZBTB4	zinc finger and BTB domain containing 4 [Source:HGNC Symbol;Acc:HGNC:23847]	0.720451
TPRA1	transmembrane protein adipocyte associated 1 [Source:HGNC Symbol;Acc:HGNC:30413]	0.720361
SCMH1	Scm polycomb group protein homolog 1 [Source:HGNC Symbol;Acc:HGNC:19003]	0.720328
MCAT	malonyl-CoA-acyl carrier protein transacylase [Source:HGNC Symbol;Acc:HGNC:29622]	0.719657
DSTN	destrin, actin depolymerizing factor [Source:HGNC Symbol;Acc:HGNC:15750]	0.719152
CDKN2D	cyclin dependent kinase inhibitor 2D [Source:HGNC Symbol;Acc:HGNC:1790]	0.718624
[truncated: 15,985 more rows]

## Sheet: Gene Sets Enriched TEM vs REST
NAME	GS<br> follow link to MSigDB	SIZE	ES	NES	NOM p-val	FDR q-val	FWER p-val	RANK AT MAX	LEADING EDGE
KEGG_RETINOL_METABOLISM	KEGG_RETINOL_METABOLISM	45	0.446796	1.47547	0	1	0.582	1518	tags=13%, list=8%, signal=15%
KEGG_COMPLEMENT_AND_COAGULATION_CASCADES	KEGG_COMPLEMENT_AND_COAGULATION_CASCADES	65	0.521726	1.44829	0.0321637	1	0.651	2547	tags=28%, list=14%, signal=32%
KEGG_GLYCOSAMINOGLYCAN_BIOSYNTHESIS_HEPARAN_SULFATE	KEGG_GLYCOSAMINOGLYCAN_BIOSYNTHESIS_HEPARAN_SULFATE	26	0.538091	1.44777	0.0378151	0.784033	0.656	3810	tags=42%, list=21%, signal=54%
KEGG_NEUROACTIVE_LIGAND_RECEPTOR_INTERACTION	KEGG_NEUROACTIVE_LIGAND_RECEPTOR_INTERACTION	259	0.400276	1.44369	0	0.620535	0.662	2449	tags=13%, list=14%, signal=15%
KEGG_FRUCTOSE_AND_MANNOSE_METABOLISM	KEGG_FRUCTOSE_AND_MANNOSE_METABOLISM	34	0.505293	1.44164	0	0.50902	0.664	2470	tags=35%, list=14%, signal=41%
KEGG_GALACTOSE_METABOLISM	KEGG_GALACTOSE_METABOLISM	26	0.476865	1.42647	0.0573951	0.48769	0.696	2827	tags=38%, list=16%, signal=46%
KEGG_DRUG_METABOLISM_CYTOCHROME_P450	KEGG_DRUG_METABOLISM_CYTOCHROME_P450	51	0.523224	1.364	0.121901	0.699102	0.842	2142	tags=22%, list=12%, signal=24%
KEGG_PROPANOATE_METABOLISM	KEGG_PROPANOATE_METABOLISM	31	0.540102	1.35528	0.0987903	0.653983	0.854	4472	tags=52%, list=25%, signal=69%
KEGG_PEROXISOME	KEGG_PEROXISOME	78	0.386494	1.28189	0.0984043	0.92204	0.947	3923	tags=41%, list=22%, signal=52%
KEGG_CALCIUM_SIGNALING_PATHWAY	KEGG_CALCIUM_SIGNALING_PATHWAY	173	0.34784	1.27735	0.0398936	0.855908	0.959	3848	tags=29%, list=21%, signal=36%
KEGG_GLYCINE_SERINE_AND_THREONINE_METABOLISM	KEGG_GLYCINE_SERINE_AND_THREONINE_METABOLISM	30	0.539791	1.27138	0.189448	0.803538	0.959	2662	tags=40%, list=15%, signal=47%
KEGG_LONG_TERM_DEPRESSION	KEGG_LONG_TERM_DEPRESSION	69	0.365496	1.27059	0.0977597	0.740044	0.959	4181	tags=29%, list=23%, signal=38%
KEGG_ARGININE_AND_PROLINE_METABOLISM	KEGG_ARGININE_AND_PROLINE_METABOLISM	52	0.445434	1.26753	0.190821	0.693553	0.959	2463	tags=25%, list=14%, signal=29%
KEGG_SYSTEMIC_LUPUS_ERYTHEMATOSUS	KEGG_SYSTEMIC_LUPUS_ERYTHEMATOSUS	77	0.36127	1.25673	0.0675676	0.685969	0.959	1711	tags=18%, list=10%, signal=20%
KEGG_HISTIDINE_METABOLISM	KEGG_HISTIDINE_METABOLISM	28	0.454683	1.25598	0.148148	0.642575	0.959	4285	tags=50%, list=24%, signal=66%
KEGG_SNARE_INTERACTIONS_IN_VESICULAR_TRANSPORT	KEGG_SNARE_INTERACTIONS_IN_VESICULAR_TRANSPORT	35	0.393084	1.24514	0.128806	0.641459	0.965	1447	tags=20%, list=8%, signal=22%
KEGG_MTOR_SIGNALING_PATHWAY	KEGG_MTOR_SIGNALING_PATHWAY	52	0.35372	1.22569	0.125	0.665613	0.984	3048	tags=29%, list=17%, signal=35%
KEGG_FATTY_ACID_METABOLISM	KEGG_FATTY_ACID_METABOLISM	40	0.342985	1.22013	0.111406	0.643899	0.984	5270	tags=40%, list=29%, signal=56%
KEGG_VALINE_LEUCINE_AND_ISOLEUCINE_DEGRADATION	KEGG_VALINE_LEUCINE_AND_ISOLEUCINE_DEGRADATION	44	0.422432	1.20908	0.197248	0.646277	0.994	5270	tags=55%, list=29%, signal=77%
KEGG_AMINO_SUGAR_AND_NUCLEOTIDE_SUGAR_METABOLISM	KEGG_AMINO_SUGAR_AND_NUCLEOTIDE_SUGAR_METABOLISM	44	0.380848	1.20536	0.176039	0.627469	0.994	3175	tags=36%, list=18%, signal=44%
KEGG_METABOLISM_OF_XENOBIOTICS_BY_CYTOCHROME_P450	KEGG_METABOLISM_OF_XENOBIOTICS_BY_CYTOCHROME_P450	49	0.411963	1.17885	0.243363	0.684927	0.999	2142	tags=16%, list=12%, signal=18%
KEGG_RIBOSOME	KEGG_RIBOSOME	83	0.653296	1.16478	0.371938	0.703183	0.999	3511	tags=60%, list=20%, signal=75%
KEGG_GLYCOLYSIS_GLUCONEOGENESIS	KEGG_GLYCOLYSIS_GLUCONEOGENESIS	58	0.437882	1.15442	0.313929	0.703995	0.999	4285	tags=38%, list=24%, signal=50%
KEGG_RENAL_CELL_CARCINOMA	KEGG_RENAL_CELL_CARCINOMA	69	0.295627	1.15305	0.175792	0.677961	0.999	4181	tags=32%, list=23%, signal=41%
KEGG_BLADDER_CANCER	KEGG_BLADDER_CANCER	41	0.32675	1.13718	0.186312	0.702386	0.999	1774	tags=20%, list=10%, signal=22%
KEGG_N_GLYCAN_BIOSYNTHESIS	KEGG_N_GLYCAN_BIOSYNTHESIS	44	0.400166	1.11901	0.34	0.734378	0.999	5283	tags=57%, list=29%, signal=80%
KEGG_ECM_RECEPTOR_INTERACTION	KEGG_ECM_RECEPTOR_INTERACTION	83	0.354311	1.10785	0.283747	0.744904	0.999	2623	tags=24%, list=15%, signal=28%
KEGG_INSULIN_SIGNALING_PATHWAY	KEGG_INSULIN_SIGNALING_PATHWAY	135	0.285789	1.10403	0.235589	0.732628	0.999	4263	tags=30%, list=24%, signal=40%
KEGG_VEGF_SIGNALING_PATHWAY	KEGG_VEGF_SIGNALING_PATHWAY	76	0.312164	1.10239	0.277523	0.713099	0.999	2955	tags=26%, list=16%, signal=31%
KEGG_LONG_TERM_POTENTIATION	KEGG_LONG_TERM_POTENTIATION	68	0.319072	1.09945	0.289888	0.696795	0.999	2432	tags=21%, list=14%, signal=24%
KEGG_ETHER_LIPID_METABOLISM	KEGG_ETHER_LIPID_METABOLISM	33	0.375578	1.0972	0.327059	0.680957	0.999	3576	tags=36%, list=20%, signal=45%
KEGG_AUTOIMMUNE_THYROID_DISEASE	KEGG_AUTOIMMUNE_THYROID_DISEASE	37	0.386584	1.09705	0.27907	0.660423	0.999	3009	tags=16%, list=17%, signal=19%
KEGG_TRYPTOPHAN_METABOLISM	KEGG_TRYPTOPHAN_METABOLISM	40	0.356254	1.08728	0.287105	0.66698	1	4564	tags=43%, list=25%, signal=57%
KEGG_STARCH_AND_SUCROSE_METABOLISM	KEGG_STARCH_AND_SUCROSE_METABOLISM	39	0.391529	1.0846	0.340564	0.657107	1	3321	tags=31%, list=18%, signal=38%
KEGG_HEDGEHOG_SIGNALING_PATHWAY	KEGG_HEDGEHOG_SIGNALING_PATHWAY	53	0.343426	1.08297	0.336576	0.644323	1	4507	tags=28%, list=25%, signal=38%
KEGG_REGULATION_OF_AUTOPHAGY	KEGG_REGULATION_OF_AUTOPHAGY	30	0.39426	1.07052	0.394175	0.665456	1	5118	tags=30%, list=28%, signal=42%
KEGG_ARACHIDONIC_ACID_METABOLISM	KEGG_ARACHIDONIC_ACID_METABOLISM	55	0.35848	1.06314	0.318408	0.666845	1	2955	tags=24%, list=16%, signal=28%
KEGG_GLYCOSYLPHOSPHATIDYLINOSITOL_GPI_ANCHOR_BIOSYNTHESIS	KEGG_GLYCOSYLPHOSPHATIDYLINOSITOL_GPI_ANCHOR_BIOSYNTHESIS	25	0.294989	1.05863	0.33012	0.663069	1	3601	tags=32%, list=20%, signal=40%
KEGG_BUTANOATE_METABOLISM	KEGG_BUTANOATE_METABOLISM	33	0.425935	1.05363	0.40668	0.661099	1	5270	tags=61%, list=29%, signal=86%
KEGG_GNRH_SIGNALING_PATHWAY	KEGG_GNRH_SIGNALING_PATHWAY	98	0.257379	1.04034	0.328267	0.679863	1	3099	tags=22%, list=17%, signal=27%
KEGG_INOSITOL_PHOSPHATE_METABOLISM	KEGG_INOSITOL_PHOSPHATE_METABOLISM	54	0.288203	1.03214	0.398329	0.686342	1	4062	tags=35%, list=23%, signal=45%
KEGG_PHOSPHATIDYLINOSITOL_SIGNALING_SYSTEM	KEGG_PHOSPHATIDYLINOSITOL_SIGNALING_SYSTEM	75	0.287204	1.02154	0.35101	0.698643	1	4062	tags=36%, list=23%, signal=46%
KEGG_GLUTATHIONE_METABOLISM	KEGG_GLUTATHIONE_METABOLISM	46	0.352983	1.01103	0.421488	0.714746	1	2194	tags=24%, list=12%, signal=27%
KEGG_GLYCEROPHOSPHOLIPID_METABOLISM	KEGG_GLYCEROPHOSPHOLIPID_METABOLISM	77	0.271381	1.00195	0.422053	0.723762	1	3327	tags=27%, list=18%, signal=33%
KEGG_PURINE_METABOLISM	KEGG_PURINE_METABOLISM	155	0.27353	0.984149	0.477612	0.755415	1	1716	tags=15%, list=10%, signal=17%
KEGG_LINOLEIC_ACID_METABOLISM	KEGG_LINOLEIC_ACID_METABOLISM	25	0.40278	0.971454	0.437751	0.776571	1	2955	tags=24%, list=16%, signal=29%
KEGG_PYRUVATE_METABOLISM	KEGG_PYRUVATE_METABOLISM	39	0.335813	0.970329	0.472603	0.763404	1	2043	tags=21%, list=11%, signal=23%
KEGG_VASCULAR_SMOOTH_MUSCLE_CONTRACTION	KEGG_VASCULAR_SMOOTH_MUSCLE_CONTRACTION	113	0.244542	0.964002	0.534404	0.763625	1	3848	tags=26%, list=21%, signal=32%
KEGG_TGF_BETA_SIGNALING_PATHWAY	KEGG_TGF_BETA_SIGNALING_PATHWAY	85	0.272495	0.955574	0.476096	0.770439	1	3916	tags=31%, list=22%, signal=39%
KEGG_VASOPRESSIN_REGULATED_WATER_REABSORPTION	KEGG_VASOPRESSIN_REGULATED_WATER_REABSORPTION	43	0.257404	0.943786	0.593301	0.788034	1	1967	tags=16%, list=11%, signal=18%
KEGG_NOTCH_SIGNALING_PATHWAY	KEGG_NOTCH_SIGNALING_PATHWAY	47	0.34182	0.942483	0.575	0.775764	1	2548	tags=26%, list=14%, signal=30%
KEGG_ERBB_SIGNALING_PATHWAY	KEGG_ERBB_SIGNALING_PATHWAY	86	0.240907	0.929404	0.641552	0.799488	1	3549	tags=24%, list=20%, signal=30%
KEGG_ABC_TRANSPORTERS	KEGG_ABC_TRANSPORTERS	42	0.319444	0.929313	0.587822	0.784645	1	3290	tags=31%, list=18%, signal=38%
KEGG_JAK_STAT_SIGNALING_PATHWAY	KEGG_JAK_STAT_SIGNALING_PATHWAY	145	0.26273	0.92652	0.620347	0.77659	1	2029	tags=14%, list=11%, signal=15%
KEGG_LYSOSOME	KEGG_LYSOSOME	120	0.289537	0.92611	0.558036	0.763095	1	3159	tags=31%, list=18%, signal=37%
KEGG_ALANINE_ASPARTATE_AND_GLUTAMATE_METABOLISM	KEGG_ALANINE_ASPARTATE_AND_GLUTAMATE_METABOLISM	31	0.330521	0.914669	0.642651	0.778205	1	1642	tags=16%, list=9%, signal=18%
KEGG_DRUG_METABOLISM_OTHER_ENZYMES	KEGG_DRUG_METABOLISM_OTHER_ENZYMES	38	0.282572	0.909285	0.622535	0.778244	1	2098	tags=16%, list=12%, signal=18%
KEGG_SPHINGOLIPID_METABOLISM	KEGG_SPHINGOLIPID_METABOLISM	38	0.288028	0.908402	0.635036	0.767292	1	4077	tags=42%, list=23%, signal=54%
KEGG_FOCAL_ADHESION	KEGG_FOCAL_ADHESION	195	0.238937	0.899878	0.754032	0.771663	1	2720	tags=18%, list=15%, signal=22%
KEGG_STEROID_HORMONE_BIOSYNTHESIS	KEGG_STEROID_HORMONE_BIOSYNTHESIS	40	0.269749	0.899325	0.752212	0.76045	1	4448	tags=18%, list=25%, signal=23%
KEGG_TYROSINE_METABOLISM	KEGG_TYROSINE_METABOLISM	39	0.284432	0.896728	0.655422	0.754101	1	2522	tags=18%, list=14%, signal=21%
KEGG_PRION_DISEASES	KEGG_PRION_DISEASES	34	0.271567	0.89318	0.761518	0.748899	1	2973	tags=26%, list=17%, signal=32%
KEGG_LYSINE_DEGRADATION	KEGG_LYSINE_DEGRADATION	43	0.307868	0.867855	0.69697	0.791989	1	3741	tags=28%, list=21%, signal=35%
KEGG_AMINOACYL_TRNA_BIOSYNTHESIS	KEGG_AMINOACYL_TRNA_BIOSYNTHESIS	41	0.364948	0.862012	0.643518	0.790293	1	4388	tags=44%, list=24%, signal=58%
KEGG_INTESTINAL_IMMUNE_NETWORK_FOR_IGA_PRODUCTION	KEGG_INTESTINAL_IMMUNE_NETWORK_FOR_IGA_PRODUCTION	41	0.271646	0.860882	0.892241	0.779856	1	3666	tags=27%, list=20%, signal=34%
KEGG_WNT_SIGNALING_PATHWAY	KEGG_WNT_SIGNALING_PATHWAY	146	0.249026	0.843096	0.735099	0.806698	1	4507	tags=31%, list=25%, signal=41%
KEGG_MELANOGENESIS	KEGG_MELANOGENESIS	99	0.234483	0.831721	0.805128	0.811683	1	1813	tags=10%, list=10%, signal=11%
KEGG_ALLOGRAFT_REJECTION	KEGG_ALLOGRAFT_REJECTION	27	0.322938	0.822584	0.761745	0.814566	1	210	tags=7%, list=1%, signal=7%
KEGG_O_GLYCAN_BIOSYNTHESIS	KEGG_O_GLYCAN_BIOSYNTHESIS	28	0.290051	0.757176	0.861386	0.89699	1	2570	tags=18%, list=14%, signal=21%
KEGG_BASAL_CELL_CARCINOMA	KEGG_BASAL_CELL_CARCINOMA	55	0.231093	0.748725	0.837398	0.89417	1	2374	tags=13%, list=13%, signal=15%
KEGG_PENTOSE_PHOSPHATE_PATHWAY	KEGG_PENTOSE_PHOSPHATE_PATHWAY	26	0.326599	0.734339	0.698413	0.898389	1	3137	tags=27%, list=17%, signal=33%
KEGG_GRAFT_VERSUS_HOST_DISEASE	KEGG_GRAFT_VERSUS_HOST_DISEASE	26	0.253526	0.630688	0.955882	0.963722	1	107	tags=4%, list=1%, signal=4%

## Sheet: Gene Sets Enriched Rest vs TEM
NAME	GS<br> follow link to MSigDB	SIZE	ES	NES	NOM p-val	FDR q-val	FWER p-val	RANK AT MAX	LEADING EDGE
KEGG_PATHOGENIC_ESCHERICHIA_COLI_INFECTION	KEGG_PATHOGENIC_ESCHERICHIA_COLI_INFECTION	51	-0.519967	-1.3897	0.056701	1	0.895	3832	tags=51%, list=21%, signal=65%
KEGG_EPITHELIAL_CELL_SIGNALING_IN_HELICOBACTER_PYLORI_INFECTION	KEGG_EPITHELIAL_CELL_SIGNALING_IN_HELICOBACTER_PYLORI_INFECTION	67	-0.445258	-1.36042	0.0595238	1	0.946	3839	tags=43%, list=21%, signal=55%
KEGG_PRIMARY_IMMUNODEFICIENCY	KEGG_PRIMARY_IMMUNODEFICIENCY	35	-0.483788	-1.35705	0.0282187	1	0.954	4412	tags=40%, list=25%, signal=53%
KEGG_SPLICEOSOME	KEGG_SPLICEOSOME	122	-0.56881	-1.33307	0.129032	1	0.98	4710	tags=61%, list=26%, signal=83%
KEGG_PORPHYRIN_AND_CHLOROPHYLL_METABOLISM	KEGG_PORPHYRIN_AND_CHLOROPHYLL_METABOLISM	32	-0.504208	-1.32886	0.00676819	1	0.98	2461	tags=34%, list=14%, signal=40%
KEGG_CELL_CYCLE	KEGG_CELL_CYCLE	123	-0.535086	-1.28055	0.16171	1	1	3815	tags=51%, list=21%, signal=65%
KEGG_CYTOSOLIC_DNA_SENSING_PATHWAY	KEGG_CYTOSOLIC_DNA_SENSING_PATHWAY	49	-0.494948	-1.18588	0.347826	1	1	3981	tags=41%, list=22%, signal=52%
KEGG_AMYOTROPHIC_LATERAL_SCLEROSIS_ALS	KEGG_AMYOTROPHIC_LATERAL_SCLEROSIS_ALS	53	-0.367919	-1.17949	0.183986	1	1	3050	tags=30%, list=17%, signal=36%
KEGG_ADHERENS_JUNCTION	KEGG_ADHERENS_JUNCTION	73	-0.415893	-1.17321	0.225919	1	1	3047	tags=32%, list=17%, signal=38%
KEGG_ANTIGEN_PROCESSING_AND_PRESENTATION	KEGG_ANTIGEN_PROCESSING_AND_PRESENTATION	60	-0.462292	-1.1729	0.296124	1	1	2999	tags=32%, list=17%, signal=38%
KEGG_PROGESTERONE_MEDIATED_OOCYTE_MATURATION	KEGG_PROGESTERONE_MEDIATED_OOCYTE_MATURATION	83	-0.418947	-1.16087	0.322702	1	1	2987	tags=30%, list=17%, signal=36%
KEGG_DNA_REPLICATION	KEGG_DNA_REPLICATION	35	-0.669873	-1.15956	0.438384	1	1	2421	tags=60%, list=13%, signal=69%
KEGG_PPAR_SIGNALING_PATHWAY	KEGG_PPAR_SIGNALING_PATHWAY	68	-0.37349	-1.15199	0.211094	1	1	3274	tags=28%, list=18%, signal=34%
KEGG_PROTEASOME	KEGG_PROTEASOME	44	-0.634794	-1.15168	0.415709	1	1	4345	tags=68%, list=24%, signal=90%
KEGG_RIG_I_LIKE_RECEPTOR_SIGNALING_PATHWAY	KEGG_RIG_I_LIKE_RECEPTOR_SIGNALING_PATHWAY	64	-0.493353	-1.1474	0.383895	1	1	2922	tags=36%, list=16%, signal=43%
KEGG_HYPERTROPHIC_CARDIOMYOPATHY_HCM	KEGG_HYPERTROPHIC_CARDIOMYOPATHY_HCM	83	-0.337248	-1.14401	0.196399	1	1	2790	tags=23%, list=16%, signal=27%
KEGG_OOCYTE_MEIOSIS	KEGG_OOCYTE_MEIOSIS	108	-0.409612	-1.13867	0.358595	1	1	3318	tags=33%, list=18%, signal=41%
KEGG_NUCLEOTIDE_EXCISION_REPAIR	KEGG_NUCLEOTIDE_EXCISION_REPAIR	42	-0.465085	-1.13269	0.360281	1	1	2343	tags=31%, list=13%, signal=36%
KEGG_BASE_EXCISION_REPAIR	KEGG_BASE_EXCISION_REPAIR	33	-0.524007	-1.13029	0.347295	1	1	3467	tags=55%, list=19%, signal=67%
KEGG_RNA_DEGRADATION	KEGG_RNA_DEGRADATION	57	-0.433853	-1.11492	0.369115	1	1	4624	tags=44%, list=26%, signal=59%
KEGG_DILATED_CARDIOMYOPATHY	KEGG_DILATED_CARDIOMYOPATHY	89	-0.338178	-1.11486	0.268518	1	1	2018	tags=19%, list=11%, signal=21%
KEGG_TYPE_II_DIABETES_MELLITUS	KEGG_TYPE_II_DIABETES_MELLITUS	47	-0.339218	-1.1115	0.239583	1	1	3506	tags=30%, list=19%, signal=37%
KEGG_PROSTATE_CANCER	KEGG_PROSTATE_CANCER	88	-0.318738	-1.10013	0.223529	1	1	3261	tags=31%, list=18%, signal=37%
KEGG_MAPK_SIGNALING_PATHWAY	KEGG_MAPK_SIGNALING_PATHWAY	264	-0.292897	-1.09719	0.220211	1	1	3421	tags=27%, list=19%, signal=33%
KEGG_SMALL_CELL_LUNG_CANCER	KEGG_SMALL_CELL_LUNG_CANCER	83	-0.331495	-1.09187	0.286509	1	1	3212	tags=31%, list=18%, signal=38%
KEGG_T_CELL_RECEPTOR_SIGNALING_PATHWAY	KEGG_T_CELL_RECEPTOR_SIGNALING_PATHWAY	107	-0.34756	-1.08171	0.38587	1	1	2320	tags=23%, list=13%, signal=27%
KEGG_MATURITY_ONSET_DIABETES_OF_THE_YOUNG	KEGG_MATURITY_ONSET_DIABETES_OF_THE_YOUNG	25	-0.451987	-1.07917	0.341737	1	1	1692	tags=8%, list=9%, signal=9%
KEGG_HOMOLOGOUS_RECOMBINATION	KEGG_HOMOLOGOUS_RECOMBINATION	27	-0.558367	-1.0763	0.409006	0.991962	1	4302	tags=59%, list=24%, signal=78%
KEGG_NEUROTROPHIN_SIGNALING_PATHWAY	KEGG_NEUROTROPHIN_SIGNALING_PATHWAY	124	-0.335802	-1.07592	0.326848	0.958458	1	3259	tags=27%, list=18%, signal=33%
KEGG_P53_SIGNALING_PATHWAY	KEGG_P53_SIGNALING_PATHWAY	65	-0.328567	-1.07045	0.347398	0.949047	1	4022	tags=43%, list=22%, signal=55%
KEGG_LEUKOCYTE_TRANSENDOTHELIAL_MIGRATION	KEGG_LEUKOCYTE_TRANSENDOTHELIAL_MIGRATION	113	-0.32693	-1.06866	0.338509	0.924445	1	3374	tags=27%, list=19%, signal=32%
KEGG_BASAL_TRANSCRIPTION_FACTORS	KEGG_BASAL_TRANSCRIPTION_FACTORS	32	-0.408506	-1.03908	0.451243	1	1	2206	tags=25%, list=12%, signal=28%
KEGG_NOD_LIKE_RECEPTOR_SIGNALING_PATHWAY	KEGG_NOD_LIKE_RECEPTOR_SIGNALING_PATHWAY	56	-0.441848	-1.03723	0.479129	0.978624	1	3771	tags=39%, list=21%, signal=50%
KEGG_ARRHYTHMOGENIC_RIGHT_VENTRICULAR_CARDIOMYOPATHY_ARVC	KEGG_ARRHYTHMOGENIC_RIGHT_VENTRICULAR_CARDIOMYOPATHY_ARVC	74	-0.315731	-1.01866	0.416388	1	1	2963	tags=24%, list=16%, signal=29%
KEGG_GAP_JUNCTION	KEGG_GAP_JUNCTION	85	-0.294886	-1.01011	0.449704	1	1	2731	tags=22%, list=15%, signal=26%
KEGG_CARDIAC_MUSCLE_CONTRACTION	KEGG_CARDIAC_MUSCLE_CONTRACTION	75	-0.387383	-0.992689	0.560297	1	1	5021	tags=41%, list=28%, signal=57%
KEGG_FC_EPSILON_RI_SIGNALING_PATHWAY	KEGG_FC_EPSILON_RI_SIGNALING_PATHWAY	79	-0.287004	-0.981829	0.473413	1	1	2986	tags=24%, list=17%, signal=29%
KEGG_REGULATION_OF_ACTIN_CYTOSKELETON	KEGG_REGULATION_OF_ACTIN_CYTOSKELETON	207	-0.266081	-0.975528	0.482171	1	1	3546	tags=26%, list=20%, signal=32%
KEGG_CHRONIC_MYELOID_LEUKEMIA	KEGG_CHRONIC_MYELOID_LEUKEMIA	73	-0.328269	-0.971891	0.544964	1	1	5446	tags=48%, list=30%, signal=68%
KEGG_PANCREATIC_CANCER	KEGG_PANCREATIC_CANCER	70	-0.305344	-0.963291	0.524786	1	1	2259	tags=27%, list=13%, signal=31%
KEGG_TOLL_LIKE_RECEPTOR_SIGNALING_PATHWAY	KEGG_TOLL_LIKE_RECEPTOR_SIGNALING_PATHWAY	94	-0.390247	-0.9606	0.585551	1	1	3395	tags=38%, list=19%, signal=47%
KEGG_GLIOMA	KEGG_GLIOMA	64	-0.293762	-0.960211	0.564179	0.988953	1	4191	tags=36%, list=23%, signal=47%
KEGG_HEMATOPOIETIC_CELL_LINEAGE	KEGG_HEMATOPOIETIC_CELL_LINEAGE	79	-0.321499	-0.946212	0.616573	1	1	4047	tags=46%, list=23%, signal=59%
KEGG_FC_GAMMA_R_MEDIATED_PHAGOCYTOSIS	KEGG_FC_GAMMA_R_MEDIATED_PHAGOCYTOSIS	94	-0.275488	-0.94492	0.529326	0.991545	1	3832	tags=34%, list=21%, signal=43%
KEGG_CELL_ADHESION_MOLECULES_CAMS	KEGG_CELL_ADHESION_MOLECULES_CAMS	119	-0.288325	-0.94192	0.541114	0.977773	1	2844	tags=24%, list=16%, signal=29%
KEGG_APOPTOSIS	KEGG_APOPTOSIS	82	-0.271653	-0.937145	0.597285	0.968365	1	3147	tags=26%, list=17%, signal=31%
KEGG_LEISHMANIA_INFECTION	KEGG_LEISHMANIA_INFECTION	62	-0.375	-0.929449	0.506536	0.968943	1	2919	tags=42%, list=16%, signal=50%
KEGG_GLYCEROLIPID_METABOLISM	KEGG_GLYCEROLIPID_METABOLISM	49	-0.293498	-0.928624	0.615796	0.950942	1	3950	tags=35%, list=22%, signal=44%
KEGG_VIRAL_MYOCARDITIS	KEGG_VIRAL_MYOCARDITIS	60	-0.28336	-0.913104	0.666667	0.975301	1	3925	tags=23%, list=22%, signal=30%
KEGG_UBIQUITIN_MEDIATED_PROTEOLYSIS	KEGG_UBIQUITIN_MEDIATED_PROTEOLYSIS	133	-0.285623	-0.909898	0.688192	0.963313	1	4970	tags=36%, list=28%, signal=50%
KEGG_MELANOMA	KEGG_MELANOMA	71	-0.26444	-0.895101	0.669887	0.979414	1	4236	tags=28%, list=24%, signal=37%
KEGG_CHEMOKINE_SIGNALING_PATHWAY	KEGG_CHEMOKINE_SIGNALING_PATHWAY	174	-0.261667	-0.893394	0.616107	0.965407	1	2468	tags=23%, list=14%, signal=26%
KEGG_B_CELL_RECEPTOR_SIGNALING_PATHWAY	KEGG_B_CELL_RECEPTOR_SIGNALING_PATHWAY	74	-0.312694	-0.892394	0.592267	0.949757	1	2286	tags=24%, list=13%, signal=28%
KEGG_ADIPOCYTOKINE_SIGNALING_PATHWAY	KEGG_ADIPOCYTOKINE_SIGNALING_PATHWAY	67	-0.282051	-0.891742	0.5875	0.934267	1	3150	tags=27%, list=18%, signal=32%
KEGG_PYRIMIDINE_METABOLISM	KEGG_PYRIMIDINE_METABOLISM	94	-0.368534	-0.885552	0.7921	0.934077	1	3715	tags=41%, list=21%, signal=52%
KEGG_ALDOSTERONE_REGULATED_SODIUM_REABSORPTION	KEGG_ALDOSTERONE_REGULATED_SODIUM_REABSORPTION	42	-0.30519	-0.885242	0.696562	0.918348	1	2767	tags=24%, list=15%, signal=28%
KEGG_NATURAL_KILLER_CELL_MEDIATED_CYTOTOXICITY	KEGG_NATURAL_KILLER_CELL_MEDIATED_CYTOTOXICITY	109	-0.313686	-0.880307	0.638889	0.914165	1	3277	tags=25%, list=18%, signal=30%
KEGG_THYROID_CANCER	KEGG_THYROID_CANCER	29	-0.32782	-0.873675	0.661512	0.914183	1	4723	tags=41%, list=26%, signal=56%
KEGG_PATHWAYS_IN_CANCER	KEGG_PATHWAYS_IN_CANCER	322	-0.232129	-0.866162	0.79403	0.91583	1	3835	tags=26%, list=21%, signal=33%
KEGG_VIBRIO_CHOLERAE_INFECTION	KEGG_VIBRIO_CHOLERAE_INFECTION	53	-0.332941	-0.843492	0.620504	0.948874	1	3107	tags=34%, list=17%, signal=41%
KEGG_CYTOKINE_CYTOKINE_RECEPTOR_INTERACTION	KEGG_CYTOKINE_CYTOKINE_RECEPTOR_INTERACTION	240	-0.280377	-0.842826	0.696375	0.934901	1	3115	tags=30%, list=17%, signal=35%
KEGG_OXIDATIVE_PHOSPHORYLATION	KEGG_OXIDATIVE_PHOSPHORYLATION	126	-0.466481	-0.83806	0.781321	0.929803	1	5231	tags=56%, list=29%, signal=79%
KEGG_COLORECTAL_CANCER	KEGG_COLORECTAL_CANCER	62	-0.278258	-0.822303	0.721311	0.94229	1	3727	tags=29%, list=21%, signal=36%
KEGG_RNA_POLYMERASE	KEGG_RNA_POLYMERASE	27	-0.353918	-0.81926	0.743487	0.933398	1	4506	tags=37%, list=25%, signal=49%
KEGG_CYSTEINE_AND_METHIONINE_METABOLISM	KEGG_CYSTEINE_AND_METHIONINE_METABOLISM	32	-0.349554	-0.799772	0.687822	0.953507	1	2685	tags=31%, list=15%, signal=37%
KEGG_AXON_GUIDANCE	KEGG_AXON_GUIDANCE	127	-0.243521	-0.7997	0.871258	0.939243	1	3804	tags=28%, list=21%, signal=36%
KEGG_PARKINSONS_DISEASE	KEGG_PARKINSONS_DISEASE	122	-0.372519	-0.792433	0.676	0.937435	1	5231	tags=50%, list=29%, signal=70%
KEGG_ENDOCYTOSIS	KEGG_ENDOCYTOSIS	172	-0.227016	-0.776925	0.865293	0.948204	1	2720	tags=22%, list=15%, signal=26%
KEGG_HUNTINGTONS_DISEASE	KEGG_HUNTINGTONS_DISEASE	171	-0.328316	-0.746242	0.893365	0.975451	1	4506	tags=39%, list=25%, signal=51%
KEGG_ENDOMETRIAL_CANCER	KEGG_ENDOMETRIAL_CANCER	52	-0.246861	-0.74445	0.797364	0.964668	1	5420	tags=44%, list=30%, signal=63%
KEGG_ALZHEIMERS_DISEASE	KEGG_ALZHEIMERS_DISEASE	159	-0.277768	-0.730794	0.752515	0.970875	1	5330	tags=45%, list=30%, signal=63%
KEGG_TIGHT_JUNCTION	KEGG_TIGHT_JUNCTION	130	-0.215121	-0.728763	0.949389	0.959951	1	1926	tags=13%, list=11%, signal=15%
KEGG_ACUTE_MYELOID_LEUKEMIA	KEGG_ACUTE_MYELOID_LEUKEMIA	57	-0.234343	-0.724512	0.891341	0.95097	1	3659	tags=30%, list=20%, signal=37%
KEGG_CITRATE_CYCLE_TCA_CYCLE	KEGG_CITRATE_CYCLE_TCA_CYCLE	30	-0.304129	-0.717728	0.867273	0.945634	1	3034	tags=30%, list=17%, signal=36%
KEGG_NON_SMALL_CELL_LUNG_CANCER	KEGG_NON_SMALL_CELL_LUNG_CANCER	54	-0.227908	-0.6894	0.954955	0.960243	1	2413	tags=20%, list=13%, signal=23%
KEGG_TYPE_I_DIABETES_MELLITUS	KEGG_TYPE_I_DIABETES_MELLITUS	33	-0.320974	-0.689306	0.880551	0.947739	1	3925	tags=33%, list=22%, signal=43%
KEGG_TASTE_TRANSDUCTION	KEGG_TASTE_TRANSDUCTION	42	-0.251588	-0.673956	0.921141	0.948295	1	2138	tags=12%, list=12%, signal=13%
KEGG_OLFACTORY_TRANSDUCTION	KEGG_OLFACTORY_TRANSDUCTION	291	-0.197783	-0.673552	0.941748	0.936393	1	290	tags=1%, list=2%, signal=1%
