# Supplementary material for: Multiomic characterization of pancreatic cancer-associated macrophage polarization reveals deregulated metabolic programs driven by the GM-CSF–PI3K pathway
Source: eLife. 2022 Feb 14;11:e73796. doi: 10.7554/eLife.73796 (PMC8843093; doi:10.7554/eLife.73796)
Supplement: Supplementary file 3. [file elife-73796-supp3.xlsx]

## Sheet: TEM up
Term	Overlap	P-value	Adjusted P-value	Old P-value	Old Adjusted P-value	Z-score	Combined Score	Genes
neutrophil degranulation (GO:0043312)	33/480	4.37386e-16	3.74118e-13	1.21439e-13	9.89946e-11	-2.01776	71.3595	ASAH1;STXBP2;PYGL;GNS;PYCARD;ACTR1B;DPP7;RAP1A;GM2A;ALDH3B1;NEU1;PSAP;RAB24;CTSH;RAC1;CTSD;CTSB;CTSA;ARSA;MANBA;ANXA3;CD300A;FUCA1;GAA;PGAM1;GGH;PRDX6;GALNS;ACLY;GLB1;LAMTOR2;MAN2B1;NIT2
neutrophil mediated immunity (GO:0002446)	33/488	7.08557e-16	3.74118e-13	1.8749e-13	9.89946e-11	-1.94339	67.7919	ASAH1;STXBP2;PYGL;GNS;PYCARD;ACTR1B;DPP7;RAP1A;GM2A;ALDH3B1;NEU1;PSAP;RAB24;CTSH;RAC1;CTSD;CTSB;CTSA;ARSA;MANBA;ANXA3;CD300A;FUCA1;GAA;PGAM1;GGH;PRDX6;GALNS;ACLY;GLB1;LAMTOR2;MAN2B1;NIT2
glycosphingolipid metabolic process (GO:0006687)	10/55	8.98439e-10	2.83447e-07	1.85798e-08	5.88607e-06	-2.37972	49.5704	CTSA;GALC;ARSA;ASAH1;GM2A;GLB1;GBA;HEXA;NEU1;PSAP
neutrophil activation involved in immune response (GO:0002283)	33/484	5.57373e-16	3.74118e-13	1.51052e-13	9.89946e-11	-1.25037	43.917	ASAH1;STXBP2;PYGL;GNS;PYCARD;ACTR1B;DPP7;RAP1A;GM2A;ALDH3B1;NEU1;PSAP;RAB24;CTSH;RAC1;CTSD;CTSB;CTSA;ARSA;MANBA;ANXA3;CD300A;FUCA1;GAA;PGAM1;GGH;PRDX6;GALNS;ACLY;GLB1;LAMTOR2;MAN2B1;NIT2
oligosaccharide catabolic process (GO:0009313)	4/10	3.94704e-06	0.00044658	3.16434e-05	0.00334154	-3.19433	39.7456	MANBA;MAN2B2;NEU1;MAN2B1
glycolipid metabolic process (GO:0006664)	12/66	1.79117e-11	7.09304e-09	6.74315e-10	2.67029e-07	-1.53208	37.9122	CTSA;GALC;ARSA;ASAH1;GM2A;GLB1;FUCA1;GBA;HEXA;NEU1;PSAP;NAGA
tRNA aminoacylation for protein translation (GO:0006418)	9/47	3.92369e-09	7.76891e-07	6.57838e-08	1.30252e-05	-1.95406	37.8233	CARS;NARS;YARS;MARS;SARS;GARS;TARS2;IARS;AARS
tRNA aminoacylation (GO:0043039)	9/41	1.07366e-09	2.83447e-07	2.33672e-08	6.16894e-06	-1.53683	31.7389	CARS;NARS;YARS;MARS;SARS;GARS;TARS2;IARS;AARS
antigen processing and presentation of exogenous peptide antigen via MHC class II (GO:0019886)	10/98	2.74658e-07	3.95507e-05	2.40266e-06	0.000345039	-1.96902	29.7474	DYNC1LI2;ACTR1B;DCTN1;CAPZA1;AP1B1;AP2A1;IFI30;CTSD;DNM2;LGMN
antigen processing and presentation of exogenous peptide antigen (GO:0002478)	10/98	2.74658e-07	3.95507e-05	2.40266e-06	0.000345039	-1.90024	28.7083	DYNC1LI2;ACTR1B;DCTN1;CAPZA1;AP1B1;AP2A1;IFI30;CTSD;DNM2;LGMN
fatty acid beta-oxidation (GO:0006635)	9/51	8.40386e-09	1.47908e-06	1.22394e-07	2.15413e-05	-1.52213	28.3033	ACOT8;ECHS1;SCP2;HSD17B4;ETFA;ACOX3;HADH;ACADS;HIBCH
carbohydrate derivative catabolic process (GO:1901136)	4/12	9.13002e-06	0.000903872	5.62997e-05	0.00524581	-2.39746	27.82	MANBA;FUCA1;NGLY1;NAGA
antigen processing and presentation of peptide antigen via MHC class II (GO:0002495)	10/99	3.0235e-07	3.99102e-05	2.61393e-06	0.000345039	-1.84779	27.7384	DYNC1LI2;ACTR1B;DCTN1;CAPZA1;AP1B1;AP2A1;IFI30;CTSD;DNM2;LGMN
carbohydrate catabolic process (GO:0016052)	6/36	3.94582e-06	0.00044658	2.22574e-05	0.00271198	-2.13207	26.529	MANBA;MAN2B2;PGAM1;NEU1;NAGA;MAN2B1
fatty acid beta-oxidation using acyl-CoA oxidase (GO:0033540)	4/16	3.23284e-05	0.00213367	0.000143524	0.00947255	-2.50951	25.9473	ACOT8;SCP2;HSD17B4;ACOX3
protein deglycosylation (GO:0006517)	3/11	0.000259032	0.0100075	0.000842883	0.0325641	-3.10384	25.6332	MAN2B2;NGLY1;MAN2B1
sphingolipid metabolic process (GO:0006665)	13/117	1.50809e-09	3.41259e-07	2.84886e-08	6.44655e-06	-1.23892	25.1654	CTSA;ARSA;ASAH1;GBA;HEXA;GALC;PLA2G15;GM2A;GLB1;ALDH3B1;NEU1;PSAP;PPT1
keratan sulfate catabolic process (GO:0042340)	4/13	1.30642e-05	0.00107924	7.28295e-05	0.0057681	-2.19757	24.7131	GALNS;GLB1;HEXA;GNS
membrane lipid catabolic process (GO:0046466)	3/9	0.000134228	0.00647768	0.000519924	0.0249563	-2.58794	23.074	FUCA1;PPT1;NAGA
bile acid biosynthetic process (GO:0006699)	5/27	1.52198e-05	0.00114801	7.089e-05	0.0057681	-2.0215	22.4243	OSBPL9;ACOT8;SCP2;OSBP;HSD17B4
chemical homeostasis within a tissue (GO:0048875)	2/7	0.00287055	0.0528715	0.00640264	0.12219	-3.81403	22.3245	NAPSA;CTSH
bile acid metabolic process (GO:0008206)	5/31	3.08084e-05	0.00212176	0.0001269	0.00873955	-2.10901	21.9078	OSBPL9;ACOT8;SCP2;OSBP;HSD17B4
proteolysis (GO:0006508)	14/292	1.20225e-05	0.00105798	9.10709e-05	0.00686935	-1.83926	20.8365	CTSA;NAPSA;LNPEP;SCPEP1;DPP7;RNPEP;LONP1;UBA3;CTSH;TPP1;UQCRC2;CTSD;CTSB;LGMN
cellular modified amino acid catabolic process (GO:0042219)	3/13	0.000441113	0.0142597	0.00127062	0.0428225	-2.66157	20.5638	ALDH4A1;GOT2;PCYOX1
fatty acid catabolic process (GO:0009062)	7/66	1.36268e-05	0.00107924	6.48486e-05	0.00570668	-1.80486	20.2207	PLA2G15;ACOT8;ECHS1;HSD17B4;HADH;ACADS;HIBCH
proteolysis involved in cellular protein catabolic process (GO:0051603)	7/94	0.000134952	0.00647768	0.000494749	0.0244901	-2.26525	20.1848	CTSA;SCPEP1;NGLY1;LONP1;CTSH;CTSB;LGMN
peptide catabolic process (GO:0043171)	4/26	0.000241754	0.00957347	0.000728761	0.0295989	-2.40673	20.0422	RNPEP;CTSH;LNPEP;TPP1
N-acetylneuraminate catabolic process (GO:0019262)	2/7	0.00287055	0.0528715	0.00640264	0.12219	-3.40366	19.9225	AMDHD2;NPL
glycosyl compound catabolic process (GO:1901658)	2/7	0.00287055	0.0528715	0.00640264	0.12219	-3.39333	19.862	FUCA1;NAGA
organelle fission (GO:0048285)	5/29	2.19563e-05	0.00158086	9.57845e-05	0.00689648	-1.84015	19.7383	DNM3;ACOT8;PEX11B;MTFR1L;DNM2
alpha-linolenic acid metabolic process (GO:0036109)	3/14	0.000556475	0.0172835	0.00152729	0.0481311	-2.58761	19.3913	ACOT8;SCP2;HSD17B4
glycosphingolipid catabolic process (GO:0046479)	2/8	0.0037973	0.0613768	0.00793094	0.130861	-3.44467	19.1987	NEU1;NAGA
coenzyme metabolic process (GO:0006732)	5/52	0.000384303	0.0132334	0.00111513	0.0392527	-2.42618	19.0797	ACLY;ACOT8;DBT;ACOT13;ACSF2
glutamine family amino acid metabolic process (GO:0009064)	4/24	0.000175084	0.00749549	0.000556337	0.0250851	-2.17464	18.8112	ALDH4A1;GOT2;ALDH18A1;NIT2
amino sugar catabolic process (GO:0046348)	2/7	0.00287055	0.0528715	0.00640264	0.12219	-3.12346	18.2824	AMDHD2;NPL
carboxylic acid catabolic process (GO:0046395)	4/29	0.000373431	0.0131448	0.00105358	0.037929	-2.30142	18.1646	ACOT8;AMDHD2;HEXA;NPL
mannose metabolic process (GO:0006013)	2/8	0.0037973	0.0613768	0.00793094	0.130861	-3.25121	18.1205	MAN2B2;MAN2B1
oxaloacetate metabolic process (GO:0006107)	2/8	0.0037973	0.0613768	0.00793094	0.130861	-3.20126	17.8421	ACLY;NIT2
short-chain fatty acid catabolic process (GO:0019626)	2/9	0.00484389	0.0668477	0.00960583	0.132944	-3.34383	17.8227	ACADS;PCK2
organonitrogen compound catabolic process (GO:1901565)	7/57	5.06787e-06	0.000535167	2.74533e-05	0.00310614	-1.45009	17.6803	PLA2G15;NAPSA;RNPEP;PPT1;LNPEP;TPP1;CTSD
macromolecule catabolic process (GO:0009057)	5/35	5.66148e-05	0.00344915	0.000211805	0.01342	-1.79333	17.5374	NAPSA;PPT1;TPP1;CTSD;LGMN
monocarboxylic acid biosynthetic process (GO:0072330)	6/69	0.000174838	0.00749549	0.000585892	0.0250851	-1.99043	17.2205	OSBPL9;ACLY;ACOT8;SCP2;OSBP;HSD17B4
regulated exocytosis (GO:0045055)	8/149	0.000433711	0.0142597	0.00151733	0.0481311	-2.22109	17.1982	LGALS3BP;TOR4A;TMSB4X;PSAP;STXBP2;SDF4;CLU;RAB11FIP5
dicarboxylic acid metabolic process (GO:0043648)	6/60	7.98454e-05	0.00451697	0.000292936	0.0164658	-1.8135	17.1111	ACLY;ACOT8;GOT2;IDH2;ALDH18A1;NIT2
glycoside catabolic process (GO:0016139)	2/8	0.0037973	0.0613768	0.00793094	0.130861	-3.03769	16.9305	FUCA1;NAGA
cellular polysaccharide catabolic process (GO:0044247)	4/20	8.28851e-05	0.00452724	0.000301457	0.0164658	-1.77346	16.6671	MANBA;GAA;PYGL;PGM2L1
ribosome disassembly (GO:0032790)	2/9	0.00484389	0.0668477	0.00960583	0.132944	-3.09308	16.4862	GFM2;MRRF
hexose metabolic process (GO:0019318)	5/46	0.000214828	0.00872531	0.000668809	0.0278788	-1.94823	16.4541	MAN2B2;FUCA1;GAA;MAN2B1;GALK1
fatty acid beta-oxidation using acyl-CoA dehydrogenase (GO:0033539)	3/16	0.000841125	0.0221926	0.00213262	0.0582426	-2.29917	16.2799	ETFA;ACOX3;ACADS
regulation of receptor-mediated endocytosis (GO:0048259)	5/37	7.45546e-05	0.00437387	0.00026777	0.0157092	-1.7115	16.266	AAK1;PPT1;ARAP3;RAC1;CLU
branched-chain amino acid catabolic process (GO:0009083)	4/22	0.000122812	0.0062753	0.000415071	0.0219157	-1.76683	15.9101	ALDH6A1;DBT;HIBCH;BCAT2
fusion of virus membrane with host plasma membrane (GO:0019064)	2/8	0.0037973	0.0613768	0.00793094	0.130861	-2.83845	15.82	CCR5;NECTIN2
ruffle organization (GO:0031529)	3/17	0.00101239	0.0250567	0.00248364	0.0634529	-2.27313	15.6742	CSF1R;RAC1;CORO1B
surfactant homeostasis (GO:0043129)	2/7	0.00287055	0.0528715	0.00640264	0.12219	-2.62763	15.3802	NAPSA;CTSH
branched-chain amino acid metabolic process (GO:0009081)	4/23	0.000147279	0.00686145	0.000482029	0.0244901	-1.73829	15.3373	ALDH6A1;DBT;HIBCH;BCAT2
negative regulation of amyloid-beta formation (GO:1902430)	2/10	0.00600735	0.075521	0.011423	0.144752	-2.93381	15.0058	APOE;CLU
aminoglycan catabolic process (GO:0006026)	4/33	0.000619747	0.0181792	0.00162894	0.0487241	-2.02183	14.9336	GLB1;FUCA1;CTBS;GNS
aspartate family amino acid metabolic process (GO:0009066)	2/11	0.00728476	0.0836163	0.0133783	0.153559	-3.02746	14.9011	GOT2;NIT2
ceramide catabolic process (GO:0046514)	2/11	0.00728476	0.0836163	0.0133783	0.153559	-2.99184	14.7257	NEU1;NAGA
valine metabolic process (GO:0006573)	2/8	0.0037973	0.0613768	0.00793094	0.130861	-2.61266	14.5616	ALDH6A1;BCAT2
cellular amino acid catabolic process (GO:0009063)	4/24	0.000175084	0.00749549	0.000556337	0.0250851	-1.67606	14.4983	ALDH6A1;DBT;HIBCH;BCAT2
regulation of clathrin-dependent endocytosis (GO:2000369)	3/16	0.000841125	0.0221926	0.00213262	0.0582426	-2.04378	14.4716	AAK1;ARAP3;UNC119
fatty-acyl-CoA metabolic process (GO:0035337)	3/20	0.00165295	0.0363649	0.00374283	0.0859224	-2.24489	14.379	ACLY;PPT1;HSD17B4
cellular protein catabolic process (GO:0044257)	7/63	9.97953e-06	0.000929858	4.94051e-05	0.00489111	-1.24613	14.3492	CTSA;SCPEP1;LONP1;CTSH;AP2A1;CTSB;LGMN
4-hydroxyproline metabolic process (GO:0019471)	2/9	0.00484389	0.0668477	0.00960583	0.132944	-2.67974	14.2831	ALDH4A1;GOT2
membrane fusion involved in viral entry into host cell (GO:0039663)	2/8	0.0037973	0.0613768	0.00793094	0.130861	-2.56245	14.2817	CCR5;NECTIN2
organic hydroxy compound biosynthetic process (GO:1901617)	5/50	0.000319426	0.0120469	0.00094732	0.0357275	-1.7731	14.2716	OSBPL9;ACOT8;SCP2;OSBP;HSD17B4
peroxisome fission (GO:0016559)	2/10	0.00600735	0.075521	0.011423	0.144752	-2.78429	14.241	ACOT8;PEX11B
fatty acid oxidation (GO:0019395)	5/51	0.000350732	0.0126669	0.00102869	0.037894	-1.7807	14.1664	ECHS1;HSD17B4;HADH;ACADS;HIBCH
glycoprotein catabolic process (GO:0006516)	2/11	0.00728476	0.0836163	0.0133783	0.153559	-2.87793	14.1651	MANBA;NGLY1
mitochondrial protein processing (GO:0034982)	2/10	0.00600735	0.075521	0.011423	0.144752	-2.75843	14.1087	STOML2;UQCRC2
keratan sulfate metabolic process (GO:0042339)	4/35	0.000778328	0.0220156	0.00198557	0.0571844	-1.9657	14.0712	GALNS;GLB1;HEXA;GNS
glycosaminoglycan catabolic process (GO:0006027)	5/57	0.000589893	0.0179324	0.00163029	0.0487241	-1.88323	14.0029	GALNS;GLB1;FUCA1;HEXA;GNS
cellular response to platelet-derived growth factor stimulus (GO:0036120)	2/8	0.0037973	0.0613768	0.00793094	0.130861	-2.50583	13.9661	MARS;CORO1B
dynamin family protein polymerization involved in membrane fission (GO:0003373)	2/10	0.00600735	0.075521	0.011423	0.144752	-2.72604	13.9431	DNM3;DNM2
pyrimidine nucleobase metabolic process (GO:0006206)	2/9	0.00484389	0.0668477	0.00960583	0.132944	-2.61023	13.9126	ALDH6A1;UCKL1
cellular response to thyroid hormone stimulus (GO:0097067)	2/11	0.00728476	0.0836163	0.0133783	0.153559	-2.80024	13.7827	CTSH;CTSB
glucosamine-containing compound catabolic process (GO:1901072)	2/11	0.00728476	0.0836163	0.0133783	0.153559	-2.77984	13.6823	AMDHD2;CTBS
glyoxylate metabolic process (GO:0046487)	2/8	0.0037973	0.0613768	0.00793094	0.130861	-2.45425	13.6787	ALDH4A1;GOT2
alpha-amino acid biosynthetic process (GO:1901607)	2/9	0.00484389	0.0668477	0.00960583	0.132944	-2.55557	13.6213	ALDH18A1;BCAT2
tRNA aminoacylation for mitochondrial protein translation (GO:0070127)	2/9	0.00484389	0.0668477	0.00960583	0.132944	-2.54673	13.5741	GARS;TARS2
acyl-CoA metabolic process (GO:0006637)	4/40	0.00129658	0.0306535	0.00310613	0.075694	-2.03759	13.546	ACOT8;DBT;ACOT13;ACSF2
lipoprotein catabolic process (GO:0042159)	2/7	0.00287055	0.0528715	0.00640264	0.12219	-2.29411	13.428	PPT1;APOE
negative regulation of receptor-mediated endocytosis (GO:0048261)	3/15	0.000689475	0.0198569	0.00181422	0.053217	-1.84231	13.4112	MTMR2;UNC119;RAC1
dynamin family protein polymerization involved in mitochondrial fission (GO:0003374)	2/10	0.00600735	0.075521	0.011423	0.144752	-2.59948	13.2957	DNM3;DNM2
sulfur compound catabolic process (GO:0044273)	4/36	0.00086748	0.0221926	0.00218265	0.0585987	-1.87344	13.2076	GALNS;GLB1;HEXA;GNS
regulation of mast cell activation involved in immune response (GO:0033006)	2/10	0.00600735	0.075521	0.011423	0.144752	-2.56676	13.1284	CD300A;STXBP2
regulation of chemokine secretion (GO:0090196)	2/9	0.00484389	0.0668477	0.00960583	0.132944	-2.4563	13.0922	PYCARD;CSF1R
endocytosis (GO:0006897)	11/264	0.000351859	0.0126669	0.00154968	0.0481311	-1.64575	13.0875	DNM3;NECAP2;ANXA3;PPT1;AP2A1;RIN3;APOE;RAC1;DNM2;MAPK3;SNX6
N-acetylneuraminate metabolic process (GO:0006054)	2/11	0.00728476	0.0836163	0.0133783	0.153559	-2.65302	13.0581	AMDHD2;NPL
regulation of protein homooligomerization (GO:0032462)	3/16	0.000841125	0.0221926	0.00213262	0.0582426	-1.82849	12.9471	GBA;APOE;CLU
galactose metabolic process (GO:0006012)	2/11	0.00728476	0.0836163	0.0133783	0.153559	-2.62002	12.8957	PGM2L1;GALK1
regulation of extent of cell growth (GO:0061387)	2/7	0.00287055	0.0528715	0.00640264	0.12219	-2.18794	12.8066	APOE;DNM2
protein transport (GO:0015031)	12/327	0.000600011	0.0179324	0.00267192	0.0661299	-1.71844	12.7483	CTSA;GGA1;RAP1A;RAB24;PPT1;UNC119;AP2A1;APOE;ARFGAP3;CLU;DNM2;SNX6
protein catabolic process (GO:0030163)	7/82	5.65792e-05	0.00344915	0.00022775	0.0138752	-1.29042	12.6201	MANBA;NAPSA;NGLY1;PPT1;TPP1;APOE;CTSD
negative regulation of amyloid precursor protein catabolic process (GO:1902992)	2/12	0.00867324	0.0940987	0.0154675	0.167812	-2.65747	12.6164	APOE;CLU
glucan catabolic process (GO:0009251)	3/19	0.00141744	0.0316229	0.00328776	0.0777285	-1.92304	12.6131	GAA;PYGL;PGM2L1
pinocytosis (GO:0006907)	2/10	0.00600735	0.075521	0.011423	0.144752	-2.40317	12.2917	PYCARD;PPT1
mitochondrial fission (GO:0000266)	3/22	0.00219396	0.0463365	0.00476347	0.106272	-1.99986	12.2433	DNM3;MTFR1L;DNM2
lipid transport (GO:0006869)	6/92	0.00082817	0.0221926	0.00235866	0.0612478	-1.71284	12.1548	SCP2;ABCA3;GOT2;OSBP;PSAP;APOE
negative regulation of protein homooligomerization (GO:0032463)	2/9	0.00484389	0.0668477	0.00960583	0.132944	-2.25915	12.0413	GBA;CLU
regulation of ARF protein signal transduction (GO:0032012)	4/31	0.000485544	0.015382	0.00131945	0.043542	-1.55881	11.8941	GIT2;ARAP3;ARFGAP3;GIT1
protein neddylation (GO:0045116)	2/14	0.0117722	0.120305	0.0200318	0.206042	-2.56992	11.4156	DCUN1D1;UBA3
cellular response to oxidative stress (GO:0034599)	6/116	0.00272044	0.0528715	0.0069073	0.130252	-1.93029	11.4022	NCF1;ALDH3B1;PXN;LONP1;PRDX6;MAPK3
regulation of amyloid-beta clearance (GO:1900221)	2/11	0.00728476	0.0836163	0.0133783	0.153559	-2.28362	11.2399	APOE;CLU
phosphatidylinositol dephosphorylation (GO:0046856)	2/12	0.00867324	0.0940987	0.0154675	0.167812	-2.33438	11.0825	MTMR2;MTMR3
glycoside metabolic process (GO:0016137)	2/15	0.0134773	0.131778	0.0224991	0.222741	-2.56808	11.0601	FUCA1;NAGA
dicarboxylic acid catabolic process (GO:0043649)	2/14	0.0117722	0.120305	0.0200318	0.206042	-2.47398	10.9894	ACOT8;GOT2
galactose catabolic process (GO:0019388)	2/9	0.00484389	0.0668477	0.00960583	0.132944	-2.05662	10.9619	PGM2L1;GALK1
translation (GO:0006412)	11/233	0.000119476	0.0062753	0.000585952	0.0250851	-1.2071	10.903	CARS;NARS;YARS;GFM2;MARS;SARS;GARS;TARS2;IARS;MRRF;AARS
positive regulation of apoptotic process (GO:0043065)	11/308	0.00125252	0.0300604	0.00483794	0.106435	-1.60724	10.7406	PYCARD;MTCH1;MTCH2;TNFAIP8;AIFM2;FAM162A;TRADD;CTSH;RAC1;CCAR2;DNM2
acyl-CoA biosynthetic process (GO:0071616)	2/15	0.0134773	0.131778	0.0224991	0.222741	-2.4846	10.7006	ACLY;PPT1
vesicle-mediated transport (GO:0016192)	13/411	0.00140741	0.0316229	0.0060689	0.12219	-1.57162	10.3193	GIT2;DCTN1;ARAP3;AP2A1;ARFGAP3;DNM2;DNM3;NECAP2;PIKFYVE;RIN3;RAC1;GIT1;SNX6
response to alcohol (GO:0097305)	3/26	0.00357617	0.0613768	0.00726822	0.130861	-1.82716	10.2932	GOT2;SDF4;CCR5
steroid biosynthetic process (GO:0006694)	6/80	0.000392988	0.0132445	0.00120712	0.0415668	-1.31231	10.2908	OSBPL9;ACOT8;SCP2;OSBP;HSD17B4;HSD17B11
negative regulation of protein oligomerization (GO:0032460)	2/13	0.01017	0.107395	0.0176867	0.189295	-2.24109	10.2828	GBA;CLU
positive regulation of cellular protein catabolic process (GO:1903364)	2/18	0.0191827	0.161625	0.0305962	0.269247	-2.59902	10.2759	GBA;APOE
glycoprotein metabolic process (GO:0009100)	4/49	0.00276447	0.0528715	0.00608609	0.12219	-1.73455	10.2181	MANBA;MAN2B2;NGLY1;MAN2B1
mitochondrion organization (GO:0007005)	9/168	0.000194773	0.00811897	0.000791012	0.0313241	-1.17109	10.0054	DNM3;PIKFYVE;STOML2;AIFM2;IDH2;LONP1;TFAM;MTFR1L;DNM2
regulation of mast cell degranulation (GO:0043304)	2/16	0.0152825	0.143239	0.0250847	0.242282	-2.37205	9.91765	CD300A;STXBP2
monocarboxylic acid metabolic process (GO:0032787)	6/109	0.00198893	0.043157	0.00520276	0.112893	-1.58197	9.84014	ALDH4A1;SCPEP1;GOT2;DLAT;NIT2;PCK2
neurotransmitter receptor internalization (GO:0099590)	2/11	0.00728476	0.0836163	0.0133783	0.153559	-1.98458	9.76805	DNM3;DNM2
fatty acid transport (GO:0015908)	2/15	0.0134773	0.131778	0.0224991	0.222741	-2.26143	9.7394	GOT2;APOE
positive regulation by host of viral process (GO:0044794)	2/12	0.00867324	0.0940987	0.0154675	0.167812	-2.03673	9.66941	YTHDC2;APOE
cellular defense response (GO:0006968)	4/57	0.0047854	0.0668477	0.00996141	0.136025	-1.80808	9.65912	LGALS3BP;NCF1;LSP1;CCR5
mitochondrial electron transport, NADH to ubiquinone (GO:0006120)	3/47	0.0185707	0.161625	0.0315978	0.275005	-2.398	9.55882	NDUFB4;NDUFS5;NDUFB3
regulation of macroautophagy (GO:0016241)	6/117	0.00283945	0.0528715	0.00718025	0.130861	-1.62762	9.54461	PIKFYVE;MTMR3;EXOC7;GBA;LAMTOR2;SNX6
regulation of phospholipid metabolic process (GO:1903725)	2/11	0.00728476	0.0836163	0.0133783	0.153559	-1.93643	9.53104	MTMR2;MTMR3
NADH metabolic process (GO:0006734)	1/7	0.0807218	0.350895	0.105255	0.447154	-3.78312	9.52115	NAXE
oligosaccharide metabolic process (GO:0009311)	5/64	0.00100392	0.0250567	0.00261998	0.0658738	-1.37216	9.47317	MANBA;MAN2B2;NEU1;NAGA;MAN2B1
glycogen catabolic process (GO:0005980)	3/19	0.00141744	0.0316229	0.00328776	0.0777285	-1.43388	9.40467	GAA;PYGL;PGM2L1
regulation of cellular carbohydrate catabolic process (GO:0043471)	1/7	0.0807218	0.350895	0.105255	0.447154	-3.72008	9.36249	PGAM1
proline metabolic process (GO:0006560)	2/8	0.0037973	0.0613768	0.00793094	0.130861	-1.67482	9.33456	ALDH4A1;ALDH18A1
regulation of amyloid fibril formation (GO:1905906)	2/9	0.00484389	0.0668477	0.00960583	0.132944	-1.73783	9.26272	APOE;CLU
positive regulation of protein tyrosine kinase activity (GO:0061098)	3/29	0.00489541	0.0668477	0.0095724	0.132944	-1.73548	9.23181	CSF1R;NCF1;UNC119
estrogen metabolic process (GO:0008210)	2/15	0.0134773	0.131778	0.0224991	0.222741	-2.13723	9.2045	HSD17B4;HSD17B11
negative regulation of endocytosis (GO:0045806)	3/29	0.00489541	0.0668477	0.0095724	0.132944	-1.69849	9.03504	MTMR2;UNC119;RAC1
negative regulation of MAP kinase activity (GO:0043407)	5/62	0.00086865	0.0221926	0.00230188	0.0607696	-1.27759	9.00517	CD300A;GBA;STK38;PDCD4;APOE
response to ethanol (GO:0045471)	2/15	0.0134773	0.131778	0.0224991	0.222741	-2.07853	8.9517	GOT2;SDF4
regulation of intrinsic apoptotic signaling pathway in response to DNA damage (GO:1902229)	2/17	0.0171851	0.15555	0.027785	0.260616	-2.19705	8.92819	CLU;CCAR2
ribonucleoprotein complex disassembly (GO:0032988)	2/14	0.0117722	0.120305	0.0200318	0.206042	-2.00935	8.92556	GFM2;MRRF
negative regulation of blood pressure (GO:0045776)	2/14	0.0117722	0.120305	0.0200318	0.206042	-2.00829	8.92084	SCPEP1;RNPEP
negative regulation of protein serine/threonine kinase activity (GO:0071901)	5/68	0.00132059	0.030762	0.00335	0.0780353	-1.33979	8.88239	PYCARD;CD300A;GBA;STK38;APOE
2-oxoglutarate metabolic process (GO:0006103)	2/18	0.0191827	0.161625	0.0305962	0.269247	-2.23868	8.85117	GOT2;IDH2
actin filament polymerization (GO:0030041)	2/19	0.0212728	0.173691	0.0335149	0.283891	-2.29484	8.83589	CORO7;RAC1
glycerophospholipid catabolic process (GO:0046475)	2/16	0.0152825	0.143239	0.0250847	0.242282	-2.11202	8.83047	PLA2G15;PRDX6
dendritic cell chemotaxis (GO:0002407)	2/17	0.0171851	0.15555	0.027785	0.260616	-2.1729	8.83003	CCR1;CCR5
alpha-amino acid catabolic process (GO:1901606)	3/40	0.0120244	0.122094	0.0213313	0.217992	-1.9911	8.80228	ALDH4A1;ALDH6A1;GOT2
tricarboxylic acid metabolic process (GO:0072350)	2/14	0.0117722	0.120305	0.0200318	0.206042	-1.95599	8.68854	ACLY;IDH2
Golgi to endosome transport (GO:0006895)	2/21	0.0257203	0.201688	0.039661	0.318898	-2.37354	8.68829	AP2A1;CORO7
cellular amino acid biosynthetic process (GO:0008652)	3/29	0.00489541	0.0668477	0.0095724	0.132944	-1.62766	8.65827	GOT2;ALDH18A1;BCAT2
apoptotic mitochondrial changes (GO:0008637)	3/35	0.00832038	0.0928132	0.0153291	0.167812	-1.78007	8.52482	AIFM2;CLU;CCAR2
positive regulation of programmed cell death (GO:0043068)	10/258	0.00112648	0.0274515	0.00412193	0.0932733	-1.24213	8.4324	PYCARD;MTCH1;MTCH2;TNFAIP8;AIFM2;FAM162A;TRADD;RAC1;CCAR2;DNM2
phosphatidylinositol metabolic process (GO:0046488)	6/113	0.00238577	0.0497244	0.00613358	0.12219	-1.39577	8.42796	CSF1R;MTMR2;PIKFYVE;MTMR3;PIK3CD;FAM126A
hexose catabolic process (GO:0019320)	2/10	0.00600735	0.075521	0.011423	0.144752	-1.63301	8.35247	PGM2L1;GALK1
positive regulation of chemokine secretion (GO:0090197)	2/9	0.00484389	0.0668477	0.00960583	0.132944	-1.5486	8.25408	PYCARD;CSF1R
gluconeogenesis (GO:0006094)	3/42	0.0137308	0.133433	0.0240429	0.235086	-1.92171	8.2405	PGAM1;GOT2;PCK2
negative regulation of leukocyte degranulation (GO:0043301)	1/7	0.0807218	0.350895	0.105255	0.447154	-3.2582	8.20006	CD300A
tRNA metabolic process (GO:0006399)	2/19	0.0212728	0.173691	0.0335149	0.283891	-2.12858	8.19574	SARS;AARS
phosphatidylinositol phosphorylation (GO:0046854)	3/28	0.00442762	0.0668477	0.00876273	0.132944	-1.49398	8.09722	PIKFYVE;PIK3CD;FAM126A
regulation of early endosome to late endosome transport (GO:2000641)	2/18	0.0191827	0.161625	0.0305962	0.269247	-2.03567	8.04851	MTMR2;MAPK3
positive regulation of cholesterol transport (GO:0032376)	2/18	0.0191827	0.161625	0.0305962	0.269247	-2.00229	7.91655	SCP2;APOE
regulation of interleukin-10 secretion (GO:2001179)	1/7	0.0807218	0.350895	0.105255	0.447154	-3.09724	7.79496	PYCARD
lipid phosphorylation (GO:0046834)	3/36	0.00899792	0.0969571	0.0164411	0.177161	-1.6306	7.68139	PIKFYVE;PIK3CD;FAM126A
glycogen metabolic process (GO:0005977)	3/34	0.00767392	0.0862091	0.0142611	0.162515	-1.56232	7.6084	GAA;PYGL;PGM2L1
response to thyroid hormone (GO:0097066)	2/12	0.00867324	0.0940987	0.0154675	0.167812	-1.59466	7.57067	CTSH;CTSB
ceramide transport (GO:0035627)	1/7	0.0807218	0.350895	0.105255	0.447154	-3.00506	7.56298	PSAP
platelet degranulation (GO:0002576)	6/125	0.00393687	0.0629899	0.00965188	0.132944	-1.35545	7.50563	LGALS3BP;TOR4A;TMSB4X;PSAP;STXBP2;CLU
reverse cholesterol transport (GO:0043691)	2/18	0.0191827	0.161625	0.0305962	0.269247	-1.89566	7.49496	APOE;CLU
polyphosphate metabolic process (GO:0006797)	1/7	0.0807218	0.350895	0.105255	0.447154	-2.96136	7.45299	MINPP1
regulation of defense response to virus by virus (GO:0050690)	3/29	0.00489541	0.0668477	0.0095724	0.132944	-1.39643	7.42824	AP1B1;AP2A1;RAC1
growth hormone receptor signaling pathway (GO:0060396)	2/21	0.0257203	0.201688	0.039661	0.318898	-2.02703	7.4199	PXN;MAPK3
citrate metabolic process (GO:0006101)	1/7	0.0807218	0.350895	0.105255	0.447154	-2.8896	7.27239	ACLY
post-Golgi vesicle-mediated transport (GO:0006892)	4/59	0.00541256	0.0732778	0.0111315	0.144752	-1.39131	7.2613	AP2A1;CORO7;EXOC5;CCDC93
fatty acid derivative biosynthetic process (GO:1901570)	2/25	0.0356184	0.246373	0.0530948	0.375456	-2.16592	7.2231	ACLY;PPT1
nucleobase metabolic process (GO:0009112)	1/7	0.0807218	0.350895	0.105255	0.447154	-2.8564	7.18884	UCKL1
positive regulation of mitochondrial membrane potential (GO:0010918)	1/7	0.0807218	0.350895	0.105255	0.447154	-2.82801	7.11739	STOML2
positive regulation of phospholipid transport (GO:2001140)	1/7	0.0807218	0.350895	0.105255	0.447154	-2.82788	7.11705	APOE
ceramide metabolic process (GO:0006672)	3/43	0.0146329	0.140476	0.0254653	0.244467	-1.68121	7.10223	PLA2G15;ASAH1;GBA
vascular smooth muscle contraction (GO:0014829)	1/8	0.0917111	0.350895	0.117611	0.447154	-2.96893	7.0931	SLC8A1
glutamate metabolic process (GO:0006536)	2/22	0.0280729	0.216914	0.0428816	0.336445	-1.98426	7.08967	GOT2;ALDH18A1
regulation of NK T cell activation (GO:0051133)	1/7	0.0807218	0.350895	0.105255	0.447154	-2.8085	7.06829	CD300A
androgen metabolic process (GO:0008209)	2/21	0.0257203	0.201688	0.039661	0.318898	-1.92475	7.04549	HSD17B4;HSD17B11
regulation of MAP kinase activity (GO:0043405)	4/88	0.0212415	0.173691	0.038475	0.317419	-1.82868	7.04372	CD300A;GBA;STK38;APOE
aggrephagy (GO:0035973)	1/7	0.0807218	0.350895	0.105255	0.447154	-2.79048	7.02293	WDFY3
negative regulation of keratinocyte proliferation (GO:0010839)	1/8	0.0917111	0.350895	0.117611	0.447154	-2.93684	7.01644	CASK
COPI-coated vesicle budding (GO:0035964)	1/7	0.0807218	0.350895	0.105255	0.447154	-2.7877	7.01593	ARFGAP3
regulation of Ras protein signal transduction (GO:0046578)	4/91	0.0236879	0.191437	0.0424848	0.336445	-1.87014	6.99954	GIT2;ARAP3;ARFGAP3;GIT1
regulation of entry of bacterium into host cell (GO:2000535)	1/8	0.0917111	0.350895	0.117611	0.447154	-2.9106	6.95375	EXOC7
negative regulation of inflammatory response (GO:0050728)	4/79	0.0148618	0.140965	0.0278056	0.260616	-1.64508	6.92405	GBA;PDCD4;APOE;TNFAIP8L2
positive regulation of lamellipodium organization (GO:1902745)	2/22	0.0280729	0.216914	0.0428816	0.336445	-1.93135	6.90063	RAC1;CORO1B
positive regulation of supramolecular fiber organization (GO:1902905)	5/85	0.0035287	0.0613768	0.0081265	0.132705	-1.21397	6.85508	PYCARD;DCTN1;APOE;RAC1;CLU
positive regulation of release of cytochrome c from mitochondria (GO:0090200)	2/27	0.0410326	0.266464	0.0603323	0.403234	-2.14629	6.85393	PYCARD;FAM162A
cellular protein metabolic process (GO:0044267)	14/485	0.00218868	0.0463365	0.00948074	0.132944	-1.11888	6.85253	MANBA;NAPSA;STOML2;GOLM1;ABCA3;SARS;GGA1;STK38;UBA3;CTSH;MAN2B1;APOE;MRRF;LGMN
alpha-beta T cell activation (GO:0046631)	1/7	0.0807218	0.350895	0.105255	0.447154	-2.71629	6.83622	STOML2
citrulline metabolic process (GO:0000052)	1/7	0.0807218	0.350895	0.105255	0.447154	-2.70896	6.81778	ALDH18A1
regulation of dephosphorylation (GO:0035303)	2/19	0.0212728	0.173691	0.0335149	0.283891	-1.76964	6.81369	MTMR2;MTMR3
calcium ion transport into cytosol (GO:0060402)	2/20	0.0234528	0.190509	0.0365376	0.303014	-1.81506	6.8115	ITPR3;SLC8A1
acetyl-CoA biosynthetic process (GO:0006085)	1/7	0.0807218	0.350895	0.105255	0.447154	-2.67953	6.74369	ACLY
negative regulation of alpha-beta T cell activation (GO:0046636)	1/8	0.0917111	0.350895	0.117611	0.447154	-2.81875	6.73432	CD300A
regulation of hyaluronan biosynthetic process (GO:1900125)	1/7	0.0807218	0.350895	0.105255	0.447154	-2.67079	6.7217	AP2A1
positive regulation of proteolysis involved in cellular protein catabolic process (GO:1903052)	2/23	0.0305083	0.229029	0.0461962	0.355217	-1.9255	6.71951	GBA;CLU
chitin metabolic process (GO:0006030)	1/8	0.0917111	0.350895	0.117611	0.447154	-2.80524	6.70204	CTBS
respiratory electron transport chain (GO:0022904)	5/95	0.0056637	0.075521	0.0124741	0.153559	-1.29337	6.69148	NDUFB4;NDUFS5;NDUFB3;ETFA;UQCRC2
regulation of vacuole organization (GO:0044088)	2/21	0.0257203	0.201688	0.039661	0.318898	-1.82789	6.69095	PIKFYVE;MTMR3
regulation of endocytosis (GO:0030100)	4/70	0.00985142	0.104729	0.0191404	0.203479	-1.43811	6.64429	MTMR2;AAK1;UNC119;APOE
organelle disassembly (GO:1903008)	2/21	0.0257203	0.201688	0.039661	0.318898	-1.81453	6.64205	GFM2;MRRF
unsaturated fatty acid metabolic process (GO:0033559)	3/45	0.0165357	0.151402	0.0284432	0.263474	-1.619	6.64151	ACOT8;SCP2;HSD17B4
mitochondrial DNA metabolic process (GO:0032042)	1/8	0.0917111	0.350895	0.117611	0.447154	-2.77862	6.63844	LONP1
cGMP-mediated signaling (GO:0019934)	1/9	0.102569	0.351203	0.129798	0.447154	-2.9142	6.63627	APOE
mitochondrial ATP synthesis coupled electron transport (GO:0042775)	4/86	0.0197006	0.16511	0.0359281	0.299527	-1.68755	6.62718	NDUFB4;NDUFS5;NDUFB3;UQCRC2
regulation of amyloid-beta formation (GO:1902003)	2/19	0.0212728	0.173691	0.0335149	0.283891	-1.7126	6.59407	APOE;CLU
regulation of dendritic spine maintenance (GO:1902950)	1/8	0.0917111	0.350895	0.117611	0.447154	-2.75518	6.58243	APOE
hexose biosynthetic process (GO:0019319)	3/45	0.0165357	0.151402	0.0284432	0.263474	-1.60333	6.57722	PGAM1;GOT2;PCK2
negative regulation of leukocyte migration (GO:0002686)	1/8	0.0917111	0.350895	0.117611	0.447154	-2.73039	6.5232	CD300A
regulation of release of cytochrome c from mitochondria (GO:0090199)	3/41	0.0128614	0.12976	0.0226649	0.222989	-1.48366	6.45917	PYCARD;FAM162A;CLU
receptor catabolic process (GO:0032801)	2/25	0.0356184	0.246373	0.0530948	0.375456	-1.93057	6.43825	AP2A1;LGMN
regulation of hydrogen peroxide metabolic process (GO:0010310)	1/7	0.0807218	0.350895	0.105255	0.447154	-2.55225	6.42337	RAC1
COPI coating of Golgi vesicle (GO:0048205)	1/7	0.0807218	0.350895	0.105255	0.447154	-2.54314	6.40044	ARFGAP3
regulation of phagocytosis, engulfment (GO:0060099)	1/7	0.0807218	0.350895	0.105255	0.447154	-2.54292	6.39989	CD300A
release of sequestered calcium ion into cytosol by sarcoplasmic reticulum (GO:0014808)	1/7	0.0807218	0.350895	0.105255	0.447154	-2.539	6.39002	CCR5
negative regulation of MAPK cascade (GO:0043409)	4/81	0.0161577	0.149671	0.0300013	0.269247	-1.54212	6.36178	CD300A;GBA;STK38;APOE
positive regulation of action potential (GO:0045760)	1/7	0.0807218	0.350895	0.105255	0.447154	-2.52327	6.35042	GBA
insulin secretion involved in cellular response to glucose stimulus (GO:0035773)	1/7	0.0807218	0.350895	0.105255	0.447154	-2.5158	6.33163	RAB11FIP5
engulfment of apoptotic cell (GO:0043652)	1/10	0.113299	0.351203	0.141817	0.447154	-2.89576	6.30617	RAC1
semaphorin-plexin signaling pathway (GO:0071526)	2/30	0.0496868	0.299254	0.0717725	0.43726	-2.09895	6.30107	PLXNB2;RAC1
signal complex assembly (GO:0007172)	1/7	0.0807218	0.350895	0.105255	0.447154	-2.50314	6.29976	PXN
negative regulation of response to endoplasmic reticulum stress (GO:1903573)	2/23	0.0305083	0.229029	0.0461962	0.355217	-1.80403	6.29562	UBXN1;CLU
glycosaminoglycan metabolic process (GO:0030203)	4/62	0.00645267	0.0798518	0.013047	0.153559	-1.24219	6.26469	GLB1;FUCA1;HEXA;GNS
mast cell degranulation (GO:0043303)	1/9	0.102569	0.351203	0.129798	0.447154	-2.74637	6.25407	PIK3CD
Golgi transport vesicle coating (GO:0048200)	1/7	0.0807218	0.350895	0.105255	0.447154	-2.47781	6.23601	ARFGAP3
regulation of pinocytosis (GO:0048548)	1/8	0.0917111	0.350895	0.117611	0.447154	-2.59502	6.1998	PPT1
response to reactive oxygen species (GO:0000302)	4/61	0.00609241	0.0759873	0.0123868	0.153559	-1.21439	6.19424	NCF1;PXN;APOE;MAPK3
negative regulation of receptor internalization (GO:0002091)	1/8	0.0917111	0.350895	0.117611	0.447154	-2.58942	6.18642	MTMR2
regulation of interleukin-23 production (GO:0032667)	1/8	0.0917111	0.350895	0.117611	0.447154	-2.58932	6.18619	RAC1
positive regulation of ATP biosynthetic process (GO:2001171)	1/7	0.0807218	0.350895	0.105255	0.447154	-2.45442	6.17714	TMSB4X
chaperone-mediated protein complex assembly (GO:0051131)	2/18	0.0191827	0.161625	0.0305962	0.269247	-1.56156	6.17402	LONP1;CLU
positive regulation of histone phosphorylation (GO:0033129)	1/7	0.0807218	0.350895	0.105255	0.447154	-2.44881	6.16303	MAPK3
sulfur amino acid catabolic process (GO:0000098)	1/9	0.102569	0.351203	0.129798	0.447154	-2.70139	6.15164	PCYOX1
regulation of Rho protein signal transduction (GO:0035023)	3/58	0.0321368	0.237873	0.05204	0.375456	-1.7869	6.14292	ARAP3;APOE;RAC1
misfolded or incompletely synthesized protein catabolic process (GO:0006515)	2/26	0.0382886	0.253762	0.0566727	0.383631	-1.88162	6.139	NGLY1;LONP1
phospholipid dephosphorylation (GO:0046839)	2/24	0.0330242	0.239956	0.0496016	0.370608	-1.79189	6.11126	MTMR2;MTMR3
negative regulation of smooth muscle cell differentiation (GO:0051151)	1/7	0.0807218	0.350895	0.105255	0.447154	-2.42119	6.09352	PDCD4
positive regulation of adaptive immune response (GO:0002821)	1/7	0.0807218	0.350895	0.105255	0.447154	-2.41808	6.0857	PYCARD
positive regulation of cGMP biosynthetic process (GO:0030828)	1/7	0.0807218	0.350895	0.105255	0.447154	-2.39761	6.03418	APOE
leucine metabolic process (GO:0006551)	1/8	0.0917111	0.350895	0.117611	0.447154	-2.51316	6.00421	BCAT2
peroxisome organization (GO:0007031)	2/24	0.0330242	0.239956	0.0496016	0.370608	-1.75364	5.98081	ACOT8;PEX11B
regulation of protein deacetylation (GO:0090311)	1/9	0.102569	0.351203	0.129798	0.447154	-2.62326	5.97373	CCAR2
positive regulation of microtubule polymerization (GO:0031116)	2/25	0.0356184	0.246373	0.0530948	0.375456	-1.79055	5.9713	DCTN1;RAC1
protein K48-linked deubiquitination (GO:0071108)	2/24	0.0330242	0.239956	0.0496016	0.370608	-1.74925	5.96586	USP8;OTUB1
semaphorin-plexin signaling pathway involved in axon guidance (GO:1902287)	1/10	0.113299	0.351203	0.141817	0.447154	-2.7349	5.95588	PLXNB2
negative regulation of intrinsic apoptotic signaling pathway in response to DNA damage (GO:1902230)	2/25	0.0356184	0.246373	0.0530948	0.375456	-1.7818	5.94211	CLU;CCAR2
negative regulation of wound healing (GO:0061045)	2/26	0.0382886	0.253762	0.0566727	0.383631	-1.82079	5.94053	CASK;APOE
regulation of epidermal growth factor-activated receptor activity (GO:0007176)	2/25	0.0356184	0.246373	0.0530948	0.375456	-1.78128	5.94039	NCF1;SNX6
regulation of apoptotic process (GO:0042981)	17/816	0.019037	0.161625	0.0689755	0.430147	-1.49852	5.93619	CSF1R;MTCH1;MTCH2;TNFAIP8;TRADD;CLU;CCAR2;DNM2;PYCARD;AIFM2;FAM162A;PPT1;CTSH;DIP2A;HS1BP3;RAC1;CTSB
cytosolic calcium ion transport (GO:0060401)	2/23	0.0305083	0.229029	0.0461962	0.355217	-1.70055	5.93452	ITPR3;SLC8A1
glucose metabolic process (GO:0006006)	4/65	0.00761746	0.0861861	0.0151607	0.167812	-1.21656	5.93357	GAA;PGAM1;GOT2;PCK2
regulation of interleukin-8 secretion (GO:2000482)	2/24	0.0330242	0.239956	0.0496016	0.370608	-1.73739	5.92539	PYCARD;TMSB4X
B cell chemotaxis (GO:0035754)	1/7	0.0807218	0.350895	0.105255	0.447154	-2.34762	5.90837	PIK3CD
diol biosynthetic process (GO:0034312)	1/9	0.102569	0.351203	0.129798	0.447154	-2.59412	5.90738	GBA
estrogen biosynthetic process (GO:0006703)	1/9	0.102569	0.351203	0.129798	0.447154	-2.58091	5.87729	HSD17B11
central nervous system myelination (GO:0022010)	1/9	0.102569	0.351203	0.129798	0.447154	-2.57851	5.87183	CLU
lipoprotein metabolic process (GO:0042157)	1/7	0.0807218	0.350895	0.105255	0.447154	-2.32799	5.85896	APOE
positive regulation of proteolysis (GO:0045862)	3/53	0.0254726	0.201688	0.042109	0.336445	-1.59561	5.85613	GBA;CTSH;APOE
positive regulation of membrane potential (GO:0045838)	1/9	0.102569	0.351203	0.129798	0.447154	-2.56684	5.84525	STOML2
regulation of lysosomal protein catabolic process (GO:1905165)	1/7	0.0807218	0.350895	0.105255	0.447154	-2.30971	5.81295	GBA
positive regulation of endocytosis (GO:0045807)	4/65	0.00761746	0.0861861	0.0151607	0.167812	-1.19141	5.81088	PYCARD;PPT1;APOE;CLU
mitochondrial ATP synthesis coupled proton transport (GO:0042776)	1/22	0.232505	0.408301	0.273787	0.490586	-3.98173	5.80872	STOML2
endothelial cell chemotaxis (GO:0035767)	1/10	0.113299	0.351203	0.141817	0.447154	-2.66566	5.80508	CORO1B
cytoplasmic sequestering of NF-kappaB (GO:0007253)	1/8	0.0917111	0.350895	0.117611	0.447154	-2.42949	5.80432	TMSB4X
regulation of microtubule nucleation (GO:0010968)	1/7	0.0807218	0.350895	0.105255	0.447154	-2.30308	5.79626	DCTN1
macropinocytosis (GO:0044351)	1/7	0.0807218	0.350895	0.105255	0.447154	-2.30295	5.79595	PYCARD
regulation of low-density lipoprotein particle receptor biosynthetic process (GO:0045714)	1/8	0.0917111	0.350895	0.117611	0.447154	-2.42205	5.78655	CNPY2
heterocycle catabolic process (GO:0046700)	1/7	0.0807218	0.350895	0.105255	0.447154	-2.28983	5.76291	ALDH4A1
positive regulation of vasculature development (GO:1904018)	4/105	0.0373022	0.253762	0.0641873	0.421878	-1.75015	5.75573	RAP1A;RRAS;ANXA3;CTSH
regulation of chaperone-mediated autophagy (GO:1904714)	1/9	0.102569	0.351203	0.129798	0.447154	-2.49202	5.67486	CTSA
negative regulation of vasculature development (GO:1901343)	1/7	0.0807218	0.350895	0.105255	0.447154	-2.25221	5.66825	PDCD4
regulation of stress-activated protein kinase signaling cascade (GO:0070302)	1/9	0.102569	0.351203	0.129798	0.447154	-2.48664	5.66262	MAPK3
glycosylceramide metabolic process (GO:0006677)	1/8	0.0917111	0.350895	0.117611	0.447154	-2.36788	5.65712	NAGA
positive regulation of purine nucleotide biosynthetic process (GO:1900373)	2/25	0.0356184	0.246373	0.0530948	0.375456	-1.69083	5.63875	TMSB4X;APOE
cytokine-mediated signaling pathway (GO:0019221)	15/634	0.0095198	0.101888	0.0355109	0.297615	-1.21047	5.63401	CCR1;CSF1R;RNASEL;TRADD;PIK3CD;IL16;IFI30;PYCARD;CAPZA1;TMSB4X;PSME4;PDCD4;IRF8;CCR5;MAPK3
myelin maintenance (GO:0043217)	1/9	0.102569	0.351203	0.129798	0.447154	-2.47138	5.62787	CLU
sphingosine biosynthetic process (GO:0046512)	1/9	0.102569	0.351203	0.129798	0.447154	-2.46958	5.62377	GBA
glycolytic process through glucose-6-phosphate (GO:0061620)	2/26	0.0382886	0.253762	0.0566727	0.383631	-1.72164	5.61703	PGAM1;PGM2L1
regulation of immunoglobulin mediated immune response (GO:0002889)	1/7	0.0807218	0.350895	0.105255	0.447154	-2.23016	5.61276	NECTIN2
cellular response to glucose stimulus (GO:0071333)	2/28	0.0438484	0.275618	0.0640707	0.421878	-1.7934	5.60799	PCK2;RAB11FIP5
nucleoside phosphate catabolic process (GO:1901292)	1/7	0.0807218	0.350895	0.105255	0.447154	-2.22328	5.59543	SMPDL3A
death-inducing signaling complex assembly (GO:0071550)	1/8	0.0917111	0.350895	0.117611	0.447154	-2.33314	5.57413	TRADD
regulation of sterol transport (GO:0032371)	1/8	0.0917111	0.350895	0.117611	0.447154	-2.33248	5.57256	APOE
glucose catabolic process to pyruvate (GO:0061718)	2/26	0.0382886	0.253762	0.0566727	0.383631	-1.70789	5.57218	PGAM1;PGM2L1
virion attachment to host cell (GO:0019062)	1/10	0.113299	0.351203	0.141817	0.447154	-2.55661	5.5676	NECTIN2
regulation of T cell receptor signaling pathway (GO:0050856)	2/27	0.0410326	0.266464	0.0603323	0.403234	-1.73921	5.55397	CD300A;NECTIN2
aldehyde catabolic process (GO:0046185)	1/7	0.0807218	0.350895	0.105255	0.447154	-2.20363	5.54597	ALDH3B1
lysosomal lumen acidification (GO:0007042)	1/8	0.0917111	0.350895	0.117611	0.447154	-2.31203	5.5237	PPT1
negative regulation of nitrogen compound metabolic process (GO:0051172)	1/8	0.0917111	0.350895	0.117611	0.447154	-2.31171	5.52292	AP2A1
cellular lipid catabolic process (GO:0044242)	2/25	0.0356184	0.246373	0.0530948	0.375456	-1.65579	5.52189	PLA2G15;ACOT8
vesicle-mediated transport to the plasma membrane (GO:0098876)	2/32	0.0557875	0.32369	0.0797562	0.447154	-1.9055	5.49966	EXOC5;CCDC93
regulation of ERAD pathway (GO:1904292)	1/9	0.102569	0.351203	0.129798	0.447154	-2.41073	5.48975	UBXN1
regulation of adiponectin secretion (GO:0070163)	1/7	0.0807218	0.350895	0.105255	0.447154	-2.17665	5.47807	RAB11FIP5
cellular response to purine-containing compound (GO:0071415)	1/9	0.102569	0.351203	0.129798	0.447154	-2.40545	5.47773	SLC8A1
dendritic spine maintenance (GO:0097062)	1/7	0.0807218	0.350895	0.105255	0.447154	-2.175	5.47392	MTMR2
cytosolic transport (GO:0016482)	5/119	0.0142032	0.137182	0.0287131	0.264427	-1.28355	5.46059	PIKFYVE;DCTN1;AP2A1;CORO7;SNX6
positive regulation of microtubule polymerization or depolymerization (GO:0031112)	2/25	0.0356184	0.246373	0.0530948	0.375456	-1.6327	5.44489	DCTN1;RAC1
regulation of cardiac conduction (GO:1903779)	3/68	0.0479068	0.291863	0.074921	0.447154	-1.7911	5.44225	TMEM65;ITPR3;SLC8A1
microglial cell activation (GO:0001774)	1/8	0.0917111	0.350895	0.117611	0.447154	-2.26945	5.42196	CLU
positive regulation of lamellipodium morphogenesis (GO:2000394)	1/8	0.0917111	0.350895	0.117611	0.447154	-2.2642	5.40943	CORO1B
positive regulation of immunoglobulin mediated immune response (GO:0002891)	1/9	0.102569	0.351203	0.129798	0.447154	-2.373	5.40383	NECTIN2
membrane invagination (GO:0010324)	1/8	0.0917111	0.350895	0.117611	0.447154	-2.25956	5.39833	FCHO2
sphingoid biosynthetic process (GO:0046520)	1/10	0.113299	0.351203	0.141817	0.447154	-2.4727	5.38487	GBA
negative regulation of alcohol biosynthetic process (GO:1902931)	1/10	0.113299	0.351203	0.141817	0.447154	-2.4648	5.36766	APOE
negative regulation of proteasomal ubiquitin-dependent protein catabolic process (GO:0032435)	2/25	0.0356184	0.246373	0.0530948	0.375456	-1.6048	5.35185	UBXN1;CCAR2
regulation of leukocyte degranulation (GO:0043300)	1/10	0.113299	0.351203	0.141817	0.447154	-2.45708	5.35086	STXBP2
aerobic respiration (GO:0009060)	2/29	0.0467338	0.285816	0.067885	0.425019	-1.74181	5.33566	MTFR1L;UQCRC2
pyruvate metabolic process (GO:0006090)	3/47	0.0185707	0.161625	0.0315978	0.275005	-1.33839	5.33504	PGAM1;DLAT;PCK2
negative regulation of chemotaxis (GO:0050922)	1/12	0.134375	0.353572	0.165362	0.447154	-2.65524	5.32939	CORO1B
regulation of cytoplasmic transport (GO:1903649)	1/9	0.102569	0.351203	0.129798	0.447154	-2.33641	5.32051	MAPK3
negative regulation of synapse organization (GO:1905809)	1/8	0.0917111	0.350895	0.117611	0.447154	-2.22264	5.31014	APOE
regulation of RNA polymerase II regulatory region sequence-specific DNA binding (GO:1903025)	1/8	0.0917111	0.350895	0.117611	0.447154	-2.2212	5.3067	TMSB4X
galactosylceramide metabolic process (GO:0006681)	1/7	0.0807218	0.350895	0.105255	0.447154	-2.1022	5.2907	GALC
mast cell activation involved in immune response (GO:0002279)	1/9	0.102569	0.351203	0.129798	0.447154	-2.31861	5.27998	PIK3CD
chitin catabolic process (GO:0006032)	1/8	0.0917111	0.350895	0.117611	0.447154	-2.20826	5.27577	CTBS
activation of cysteine-type endopeptidase activity involved in apoptotic process (GO:0006919)	4/80	0.0155012	0.144435	0.028891	0.264528	-1.26245	5.26042	PYCARD;MTCH1;FAM162A;TRADD
regulation of protein tyrosine kinase activity (GO:0061097)	2/32	0.0557875	0.32369	0.0797562	0.447154	-1.81993	5.25268	CSF1R;UNC119
regulation of NADP metabolic process (GO:1902031)	1/8	0.0917111	0.350895	0.117611	0.447154	-2.19587	5.24617	PGAM1
positive regulation of lipid transport (GO:0032370)	1/8	0.0917111	0.350895	0.117611	0.447154	-2.19545	5.24518	APOE
regulation of nitrogen compound metabolic process (GO:0051171)	1/9	0.102569	0.351203	0.129798	0.447154	-2.29907	5.23549	APOE
ornithine metabolic process (GO:0006591)	1/10	0.113299	0.351203	0.141817	0.447154	-2.39452	5.21461	ALDH18A1
regulation of apoptotic signaling pathway (GO:2001233)	2/26	0.0382886	0.253762	0.0566727	0.383631	-1.59678	5.20965	PYCARD;CTSH
release of sequestered calcium ion into cytosol by endoplasmic reticulum (GO:1903514)	1/8	0.0917111	0.350895	0.117611	0.447154	-2.17608	5.1989	CCR5
regulation of Cdc42 protein signal transduction (GO:0032489)	1/8	0.0917111	0.350895	0.117611	0.447154	-2.17161	5.18823	APOE
regulation of ATP biosynthetic process (GO:2001169)	1/9	0.102569	0.351203	0.129798	0.447154	-2.27732	5.18595	TMSB4X
cell junction maintenance (GO:0034331)	1/9	0.102569	0.351203	0.129798	0.447154	-2.27432	5.17912	CSF1R
canonical glycolysis (GO:0061621)	2/26	0.0382886	0.253762	0.0566727	0.383631	-1.58541	5.17256	PGAM1;PGM2L1
regulation of developmental growth (GO:0048638)	2/31	0.0527053	0.313854	0.0757305	0.447154	-1.75379	5.16146	APOE;DNM2
negative regulation of interferon-beta production (GO:0032688)	1/10	0.113299	0.351203	0.141817	0.447154	-2.36459	5.14943	PYCARD
negative regulation of glycoprotein biosynthetic process (GO:0010561)	1/8	0.0917111	0.350895	0.117611	0.447154	-2.15381	5.14568	ACOT8
negative regulation of NIK/NF-kappaB signaling (GO:1901223)	1/10	0.113299	0.351203	0.141817	0.447154	-2.36193	5.14363	TMSB4X
regulation of NIK/NF-kappaB signaling (GO:1901222)	2/29	0.0467338	0.285816	0.067885	0.425019	-1.67399	5.12792	TMSB4X;PDCD4
cellular response to cadmium ion (GO:0071276)	2/30	0.0496868	0.299254	0.0717725	0.43726	-1.70448	5.11686	NCF1;MAPK3
response to dopamine (GO:1903350)	1/10	0.113299	0.351203	0.141817	0.447154	-2.3447	5.10612	MAPK3
regulation of low-density lipoprotein particle clearance (GO:0010988)	1/8	0.0917111	0.350895	0.117611	0.447154	-2.13557	5.10212	CNPY2
cellular response to caffeine (GO:0071313)	1/8	0.0917111	0.350895	0.117611	0.447154	-2.1255	5.07805	SLC8A1
response to misfolded protein (GO:0051788)	1/8	0.0917111	0.350895	0.117611	0.447154	-2.12182	5.06926	CLU
positive regulation of vasculogenesis (GO:2001214)	1/9	0.102569	0.351203	0.129798	0.447154	-2.21798	5.05082	RAP1A
negative regulation of neuron death (GO:1901215)	4/84	0.0182308	0.161625	0.033482	0.283891	-1.25769	5.0366	GBA;PPT1;APOE;LGMN
positive regulation of natural killer cell mediated immune response to tumor cell (GO:0002857)	1/10	0.113299	0.351203	0.141817	0.447154	-2.30898	5.02833	NECTIN2
monocarboxylic acid catabolic process (GO:0072329)	2/26	0.0382886	0.253762	0.0566727	0.383631	-1.53683	5.01408	PLA2G15;ACOT8
microtubule anchoring at centrosome (GO:0034454)	1/10	0.113299	0.351203	0.141817	0.447154	-2.29896	5.00651	DCTN1
protein modification process (GO:0036211)	4/85	0.0189569	0.161625	0.0346925	0.292303	-1.25449	4.97481	MANBA;STK38;UBA3;MAN2B1
regulation of axonogenesis (GO:0050770)	3/56	0.0293721	0.22368	0.0479424	0.3651	-1.40073	4.94137	PLXNB2;APOE;DNM2
positive regulation of early endosome to late endosome transport (GO:2000643)	1/9	0.102569	0.351203	0.129798	0.447154	-2.1689	4.93906	MTMR2
phosphatidylinositol biosynthetic process (GO:0006661)	4/99	0.0310194	0.231767	0.0542869	0.378812	-1.42119	4.93599	MTMR2;PIKFYVE;MTMR3;PIK3CD
negative regulation of response to DNA damage stimulus (GO:2001021)	2/29	0.0467338	0.285816	0.067885	0.425019	-1.61104	4.93509	CLU;CCAR2
positive regulation of smooth muscle cell apoptotic process (GO:0034393)	1/9	0.102569	0.351203	0.129798	0.447154	-2.16691	4.93453	PDCD4
sterol catabolic process (GO:0016127)	1/10	0.113299	0.351203	0.141817	0.447154	-2.26322	4.92868	APOE
cellular response to growth hormone stimulus (GO:0071378)	1/11	0.1239	0.351556	0.153671	0.447154	-2.35303	4.91379	PXN
antigen processing and presentation of exogenous peptide antigen via MHC class I (GO:0042590)	4/79	0.0148618	0.140965	0.0278056	0.260616	-1.16668	4.9105	NCF1;PSME4;LNPEP;IFI30
negative regulation of phagocytosis (GO:0050765)	1/10	0.113299	0.351203	0.141817	0.447154	-2.2428	4.88421	CD300A
membrane raft organization (GO:0031579)	1/11	0.1239	0.351556	0.153671	0.447154	-2.32619	4.85773	PPT1
very-low-density lipoprotein particle remodeling (GO:0034372)	1/10	0.113299	0.351203	0.141817	0.447154	-2.22981	4.85592	APOE
regulation of respiratory burst (GO:0060263)	1/11	0.1239	0.351556	0.153671	0.447154	-2.32532	4.85592	RAC1
negative regulation of proteasomal protein catabolic process (GO:1901799)	2/29	0.0467338	0.285816	0.067885	0.425019	-1.58445	4.85362	UBXN1;CCAR2
long-chain fatty acid metabolic process (GO:0001676)	3/56	0.0293721	0.22368	0.0479424	0.3651	-1.37324	4.84441	ACOT8;SCP2;HSD17B4
positive regulation of myeloid cell apoptotic process (GO:0033034)	1/8	0.0917111	0.350895	0.117611	0.447154	-2.0269	4.84249	PIK3CD
lytic vacuole organization (GO:0080171)	2/29	0.0467338	0.285816	0.067885	0.425019	-1.57899	4.83689	GAA;TPP1
low-density lipoprotein particle receptor catabolic process (GO:0032802)	1/11	0.1239	0.351556	0.153671	0.447154	-2.30981	4.82353	AP2A1
negative regulation of blood vessel endothelial cell migration (GO:0043537)	2/32	0.0557875	0.32369	0.0797562	0.447154	-1.67098	4.82278	CARD10;APOE
fatty-acyl-CoA biosynthetic process (GO:0046949)	2/31	0.0527053	0.313854	0.0757305	0.447154	-1.63443	4.81018	ACLY;PPT1
chylomicron remnant clearance (GO:0034382)	1/8	0.0917111	0.350895	0.117611	0.447154	-2.00602	4.79262	APOE
carbohydrate phosphorylation (GO:0046835)	1/12	0.134375	0.353572	0.165362	0.447154	-2.38291	4.78278	ADK
positive regulation of transcription of nuclear large rRNA transcript from RNA polymerase I promoter (GO:1901838)	1/10	0.113299	0.351203	0.141817	0.447154	-2.19057	4.77046	MARS
neutrophil extravasation (GO:0072672)	1/7	0.0807218	0.350895	0.105255	0.447154	-1.8926	4.76319	PIK3CD
positive regulation of protein homooligomerization (GO:0032464)	1/10	0.113299	0.351203	0.141817	0.447154	-2.18548	4.75938	CLU
negative regulation of cellular metabolic process (GO:0031324)	2/35	0.0653964	0.350895	0.0922144	0.447154	-1.74324	4.75431	MTMR2;APOE
podosome assembly (GO:0071800)	1/10	0.113299	0.351203	0.141817	0.447154	-2.16765	4.72056	NCF1
T cell chemotaxis (GO:0010818)	1/11	0.1239	0.351556	0.153671	0.447154	-2.25769	4.71468	PIK3CD
regulation of natural killer cell mediated cytotoxicity directed against tumor cell target (GO:0002858)	1/11	0.1239	0.351556	0.153671	0.447154	-2.25062	4.69992	NECTIN2
response to muscle stretch (GO:0035994)	1/10	0.113299	0.351203	0.141817	0.447154	-2.15754	4.69854	SLC8A1
modulation by host of viral genome replication (GO:0044827)	1/12	0.134375	0.353572	0.165362	0.447154	-2.33678	4.69019	YTHDC2
mast cell mediated immunity (GO:0002448)	1/10	0.113299	0.351203	0.141817	0.447154	-2.14946	4.68093	PIK3CD
chylomicron remodeling (GO:0034371)	1/10	0.113299	0.351203	0.141817	0.447154	-2.14742	4.6765	APOE
calcium ion regulated exocytosis (GO:0017156)	1/12	0.134375	0.353572	0.165362	0.447154	-2.32689	4.67036	SDF4
receptor metabolic process (GO:0043112)	3/59	0.0335685	0.242797	0.0541504	0.378812	-1.36924	4.64742	DNM3;DNM2;LGMN
cellular response to acidic pH (GO:0071468)	1/10	0.113299	0.351203	0.141817	0.447154	-2.13308	4.64528	RAB11FIP5
chylomicron assembly (GO:0034378)	1/11	0.1239	0.351556	0.153671	0.447154	-2.22417	4.64468	APOE
cellular response to dopamine (GO:1903351)	1/10	0.113299	0.351203	0.141817	0.447154	-2.12496	4.62758	MAPK3
positive regulation of natural killer cell mediated cytotoxicity directed against tumor cell target (GO:0002860)	1/10	0.113299	0.351203	0.141817	0.447154	-2.11597	4.608	NECTIN2
coenzyme A metabolic process (GO:0015936)	1/11	0.1239	0.351556	0.153671	0.447154	-2.18766	4.56844	ACLY
bone resorption (GO:0045453)	1/9	0.102569	0.351203	0.129798	0.447154	-1.98963	4.53082	TPP1
positive regulation of protein dephosphorylation (GO:0035307)	2/32	0.0557875	0.32369	0.0797562	0.447154	-1.56551	4.51837	CD300A;GBA
endosome to lysosome transport via multivesicular body sorting pathway (GO:0032510)	1/7	0.0807218	0.350895	0.105255	0.447154	-1.79386	4.51469	CHMP2B
regulation of DNA damage checkpoint (GO:2000001)	1/11	0.1239	0.351556	0.153671	0.447154	-2.16034	4.5114	CCAR2
negative regulation of interleukin-8 secretion (GO:2000483)	1/8	0.0917111	0.350895	0.117611	0.447154	-1.88766	4.50984	TMSB4X
negative regulation of cytokine production involved in inflammatory response (GO:1900016)	1/10	0.113299	0.351203	0.141817	0.447154	-2.07061	4.50924	PDCD4
lysosome organization (GO:0007040)	2/32	0.0557875	0.32369	0.0797562	0.447154	-1.55919	4.50015	GAA;TPP1
Rap protein signal transduction (GO:0032486)	1/11	0.1239	0.351556	0.153671	0.447154	-2.15286	4.49577	RAP1A
receptor-mediated endocytosis (GO:0006898)	6/189	0.0263085	0.205284	0.0535459	0.376963	-1.23149	4.47998	DNM3;FCHO2;PPT1;AP2A1;APOE;DNM2
neuronal ion channel clustering (GO:0045161)	1/10	0.113299	0.351203	0.141817	0.447154	-2.05336	4.47166	MTCH1
positive regulation of protein metabolic process (GO:0051247)	4/97	0.0290752	0.223568	0.0511856	0.375456	-1.26167	4.46361	GBA;CNPY2;APOE;CLU
lipoprotein transport (GO:0042953)	1/9	0.102569	0.351203	0.129798	0.447154	-1.95987	4.46306	UNC119
nerve growth factor signaling pathway (GO:0038180)	1/11	0.1239	0.351556	0.153671	0.447154	-2.13547	4.45945	RAP1A
regulation of granulocyte differentiation (GO:0030852)	1/11	0.1239	0.351556	0.153671	0.447154	-2.13535	4.4592	C1QC
regulation of nitric-oxide synthase activity (GO:0050999)	2/37	0.0720858	0.350895	0.100813	0.447154	-1.69145	4.44835	APOE;DNM2
secondary alcohol biosynthetic process (GO:1902653)	2/37	0.0720858	0.350895	0.100813	0.447154	-1.69125	4.4478	ACLY;APOE
positive regulation of NIK/NF-kappaB signaling (GO:1901224)	2/36	0.0687139	0.350895	0.0964858	0.447154	-1.65195	4.42358	CARD10;PDCD4
lipoprotein localization (GO:0044872)	1/9	0.102569	0.351203	0.129798	0.447154	-1.94036	4.41861	UNC119
modulation by host of viral process (GO:0044788)	1/12	0.134375	0.353572	0.165362	0.447154	-2.19814	4.41194	APOE
protein localization to mitochondrion (GO:0070585)	1/11	0.1239	0.351556	0.153671	0.447154	-2.11034	4.40699	MTCH2
positive regulation of tumor necrosis factor superfamily cytokine production (GO:1903557)	2/33	0.0589313	0.336993	0.0838471	0.447154	-1.55422	4.40059	PYCARD;CLU
response to acidic pH (GO:0010447)	1/11	0.1239	0.351556	0.153671	0.447154	-2.10669	4.39937	RAB11FIP5
mitochondrial respiratory chain complex I biogenesis (GO:0097031)	3/65	0.0428401	0.271435	0.0676507	0.425019	-1.39497	4.39454	NDUFB4;NDUFS5;NDUFB3
negative regulation of cell activation (GO:0050866)	1/11	0.1239	0.351556	0.153671	0.447154	-2.10063	4.3867	APOE
mammary gland epithelium development (GO:0061180)	1/14	0.154953	0.368536	0.188264	0.460202	-2.34468	4.37197	CSF1R
NADH dehydrogenase complex assembly (GO:0010257)	3/65	0.0428401	0.271435	0.0676507	0.425019	-1.38716	4.36993	NDUFB4;NDUFS5;NDUFB3
neuron projection regeneration (GO:0031102)	1/11	0.1239	0.351556	0.153671	0.447154	-2.09049	4.36553	APOE
protein processing (GO:0016485)	4/102	0.0340761	0.245348	0.0591258	0.398533	-1.29106	4.3627	STOML2;CTSH;UQCRC2;LGMN
regulation of autophagosome assembly (GO:2000785)	2/34	0.0621349	0.350895	0.0880007	0.447154	-1.56973	4.3614	PIKFYVE;MTMR3
negative regulation of B cell proliferation (GO:0030889)	1/11	0.1239	0.351556	0.153671	0.447154	-2.08187	4.34753	CD300A
endothelial cell migration (GO:0043542)	2/36	0.0687139	0.350895	0.0964858	0.447154	-1.62233	4.34428	PXN;CORO1B
actin polymerization or depolymerization (GO:0008154)	2/37	0.0720858	0.350895	0.100813	0.447154	-1.651	4.34195	CORO7;RAC1
positive regulation of DNA-dependent DNA replication (GO:2000105)	1/13	0.144726	0.361844	0.176892	0.454129	-2.24581	4.34096	STOML2
positive regulation of T cell receptor signaling pathway (GO:0050862)	1/11	0.1239	0.351556	0.153671	0.447154	-2.07689	4.33713	NECTIN2
phosphatidylinositol-3-phosphate biosynthetic process (GO:0036092)	1/9	0.102569	0.351203	0.129798	0.447154	-1.89939	4.32532	PIK3CD
positive regulation of amyloid precursor protein catabolic process (GO:1902993)	1/13	0.144726	0.361844	0.176892	0.454129	-2.23647	4.3229	CLU
establishment of synaptic vesicle localization (GO:0097480)	1/12	0.134375	0.353572	0.165362	0.447154	-2.15318	4.3217	DNM2
sphingosine metabolic process (GO:0006670)	1/10	0.113299	0.351203	0.141817	0.447154	-1.97756	4.30659	GBA
DNA damage induced protein phosphorylation (GO:0006975)	1/9	0.102569	0.351203	0.129798	0.447154	-1.88901	4.30168	MAPK3
protein localization to pre-autophagosomal structure (GO:0034497)	1/12	0.134375	0.353572	0.165362	0.447154	-2.13646	4.28813	WDR45B
regulation of endothelial cell chemotaxis (GO:2001026)	1/14	0.154953	0.368536	0.188264	0.460202	-2.29853	4.28591	TMSB4X
positive regulation of leukocyte apoptotic process (GO:2000108)	1/10	0.113299	0.351203	0.141817	0.447154	-1.95048	4.24761	PIK3CD
organic cyclic compound biosynthetic process (GO:1901362)	2/38	0.0755101	0.350895	0.105192	0.447154	-1.63835	4.23265	SCP2;ALDH18A1
response to cadmium ion (GO:0046686)	2/32	0.0557875	0.32369	0.0797562	0.447154	-1.4662	4.23176	NCF1;MAPK3
positive regulation of lamellipodium assembly (GO:0010592)	1/14	0.154953	0.368536	0.188264	0.460202	-2.26442	4.22232	RAC1
cellular protein localization (GO:0034613)	9/328	0.0175034	0.15753	0.0444974	0.347211	-1.04325	4.22031	CTSA;GGA1;WDR45B;RAB24;AP2A1;LAMTOR2;ARFGAP3;CORO1B;SNX6
cholesterol biosynthetic process (GO:0006695)	2/36	0.0687139	0.350895	0.0964858	0.447154	-1.57087	4.20649	ACLY;APOE
cellular response to oxygen-containing compound (GO:1901701)	8/275	0.0179064	0.160247	0.0429053	0.336445	-1.04163	4.19007	PYCARD;RAP1A;NCF1;PXN;PDCD4;LAMTOR2;CCR5;MAPK3
ESCRT complex disassembly (GO:1904896)	1/11	0.1239	0.351556	0.153671	0.447154	-2.00384	4.18458	CHMP2B
vasoconstriction (GO:0042310)	1/13	0.144726	0.361844	0.176892	0.454129	-2.16447	4.18373	SLC8A1
N-acetylglucosamine metabolic process (GO:0006044)	1/15	0.165058	0.372217	0.19948	0.462648	-2.29669	4.13738	AMDHD2
negative regulation of leukocyte activation (GO:0002695)	1/12	0.134375	0.353572	0.165362	0.447154	-2.06046	4.1356	CD300A
negative regulation of cytosolic calcium ion concentration (GO:0051481)	1/11	0.1239	0.351556	0.153671	0.447154	-1.97208	4.11825	SLC8A1
monocyte differentiation (GO:0030224)	1/12	0.134375	0.353572	0.165362	0.447154	-2.04674	4.10805	CSF1R
mitochondrial fragmentation involved in apoptotic process (GO:0043653)	1/10	0.113299	0.351203	0.141817	0.447154	-1.88635	4.10795	CCAR2
relaxation of muscle (GO:0090075)	1/12	0.134375	0.353572	0.165362	0.447154	-2.04	4.09452	SLC8A1
semaphorin-plexin signaling pathway involved in neuron projection guidance (GO:1902285)	1/14	0.154953	0.368536	0.188264	0.460202	-2.1943	4.09156	PLXNB2
endosome organization (GO:0007032)	2/37	0.0720858	0.350895	0.100813	0.447154	-1.55337	4.08522	USP8;CHMP2B
glutamine metabolic process (GO:0006541)	1/11	0.1239	0.351556	0.153671	0.447154	-1.95579	4.08424	NIT2
organic cyclic compound catabolic process (GO:1901361)	1/12	0.134375	0.353572	0.165362	0.447154	-2.03214	4.07876	ALDH4A1
positive regulation of cholesterol esterification (GO:0010873)	1/10	0.113299	0.351203	0.141817	0.447154	-1.87236	4.0775	APOE
regulation of mast cell activation (GO:0033003)	1/10	0.113299	0.351203	0.141817	0.447154	-1.86927	4.07077	NECTIN2
cellular amide metabolic process (GO:0043603)	3/63	0.0396207	0.261497	0.0629937	0.419252	-1.26011	4.06814	PLA2G15;ASAH1;NIT2
macrophage differentiation (GO:0030225)	1/12	0.134375	0.353572	0.165362	0.447154	-2.02554	4.0655	CSF1R
negative regulation of cell division (GO:0051782)	1/12	0.134375	0.353572	0.165362	0.447154	-2.02336	4.06113	TXNIP
iron ion transport (GO:0006826)	1/13	0.144726	0.361844	0.176892	0.454129	-2.09764	4.05457	SLC40A1
positive regulation of apoptotic signaling pathway (GO:2001235)	3/77	0.0647632	0.350895	0.0986622	0.447154	-1.48115	4.05395	PYCARD;FAM162A;CTSH
response to caffeine (GO:0031000)	1/8	0.0917111	0.350895	0.117611	0.447154	-1.69549	4.05072	SLC8A1
myeloid cell activation involved in immune response (GO:0002275)	1/12	0.134375	0.353572	0.165362	0.447154	-2.01438	4.04311	PYCARD
lipoprotein biosynthetic process (GO:0042158)	1/10	0.113299	0.351203	0.141817	0.447154	-1.83622	3.99878	WDR45B
microtubule anchoring at microtubule organizing center (GO:0072393)	1/12	0.134375	0.353572	0.165362	0.447154	-1.99136	3.99689	DCTN1
positive regulation of amyloid-beta formation (GO:1902004)	1/11	0.1239	0.351556	0.153671	0.447154	-1.90948	3.98753	CLU
mitochondrial respiratory chain complex I assembly (GO:0032981)	3/65	0.0428401	0.271435	0.0676507	0.425019	-1.26549	3.98664	NDUFB4;NDUFS5;NDUFB3
cell-cell junction maintenance (GO:0045217)	1/11	0.1239	0.351556	0.153671	0.447154	-1.89909	3.96583	CSF1R
regulation of myeloid leukocyte mediated immunity (GO:0002886)	1/12	0.134375	0.353572	0.165362	0.447154	-1.97005	3.95412	STXBP2
positive regulation of JNK cascade (GO:0046330)	3/77	0.0647632	0.350895	0.0986622	0.447154	-1.43854	3.93731	PYCARD;NCF1;CARD9
sphingolipid catabolic process (GO:0030149)	1/12	0.134375	0.353572	0.165362	0.447154	-1.94808	3.91003	PPT1
hepatocyte growth factor receptor signaling pathway (GO:0048012)	1/12	0.134375	0.353572	0.165362	0.447154	-1.94605	3.90596	RAC1
fatty acid homeostasis (GO:0055089)	1/10	0.113299	0.351203	0.141817	0.447154	-1.7862	3.88985	APOE
cellular protein modification process (GO:0006464)	18/1002	0.0560203	0.323854	0.169182	0.454129	-1.34793	3.8848	ARSA;MANBA;MTMR2;RNASEL;MTMR3;GOLM1;WDR45B;NGLY1;DCUN1D1;PIK3CD;MAN2B2;PSME4;STK38;AAK1;UBA3;MAN2B1;APOE;MAPK3
positive regulation of viral release from host cell (GO:1902188)	1/16	0.175043	0.374687	0.210541	0.462648	-2.22317	3.87437	CHMP2B
response to sterol (GO:0036314)	1/12	0.134375	0.353572	0.165362	0.447154	-1.92985	3.87344	CCR5
regulation of bone remodeling (GO:0046850)	1/13	0.144726	0.361844	0.176892	0.454129	-2.00166	3.86903	CSF1R
relaxation of cardiac muscle (GO:0055119)	1/12	0.134375	0.353572	0.165362	0.447154	-1.92449	3.86268	SLC8A1
regulation of axon extension (GO:0030516)	2/35	0.0653964	0.350895	0.0922144	0.447154	-1.41478	3.85852	APOE;DNM2
activation of cysteine-type endopeptidase activity involved in apoptotic signaling pathway (GO:0097296)	1/12	0.134375	0.353572	0.165362	0.447154	-1.92066	3.855	TRADD
negative regulation of macromolecule metabolic process (GO:0010605)	4/125	0.0631402	0.350895	0.103385	0.447154	-1.39412	3.85111	CCR1;MTMR2;CNPY2;DIP2A
cellular response to reactive oxygen species (GO:0034614)	3/66	0.0444975	0.277496	0.0700367	0.433352	-1.23523	3.84443	NCF1;PXN;MAPK3
negative regulation of bone mineralization (GO:0030502)	1/12	0.134375	0.353572	0.165362	0.447154	-1.91425	3.84213	CCR1
regulation of mitotic spindle organization (GO:0060236)	2/36	0.0687139	0.350895	0.0964858	0.447154	-1.43439	3.84102	DCTN1;CHMP2B
negative regulation of DNA repair (GO:0045738)	1/7	0.0807218	0.350895	0.105255	0.447154	-1.52445	3.83666	OTUB1
positive regulation of peptidase activity (GO:0010952)	1/13	0.144726	0.361844	0.176892	0.454129	-1.98431	3.83551	CTSH
regulation of necrotic cell death (GO:0010939)	1/14	0.154953	0.368536	0.188264	0.460202	-2.05202	3.82626	TRADD
positive regulation of receptor-mediated endocytosis (GO:0048260)	2/42	0.0896988	0.350895	0.123197	0.447154	-1.58433	3.82029	PPT1;CLU
regulation of protein modification process (GO:0031399)	2/43	0.0933605	0.351203	0.127809	0.447154	-1.61031	3.8185	PLXNB2;CCAR2
synaptic vesicle endocytosis (GO:0048488)	2/30	0.0496868	0.299254	0.0717725	0.43726	-1.27117	3.81607	DNM3;DNM2
cellular respiration (GO:0045333)	3/58	0.0321368	0.237873	0.05204	0.375456	-1.10488	3.7983	ETFA;MTFR1L;UQCRC2
positive regulation of protein polymerization (GO:0032273)	3/65	0.0428401	0.271435	0.0676507	0.425019	-1.20456	3.79471	PYCARD;DCTN1;RAC1
glycerolipid metabolic process (GO:0046486)	1/11	0.1239	0.351556	0.153671	0.447154	-1.81429	3.78874	PLA2G15
glycerophospholipid metabolic process (GO:0006650)	3/65	0.0428401	0.271435	0.0676507	0.425019	-1.20146	3.78493	PLA2G15;CSF1R;PRDX6
regulation of neuron death (GO:1901214)	3/73	0.0569711	0.328154	0.0877661	0.447154	-1.31601	3.77066	GBA;APOE;CLU
antigen processing and presentation of exogenous peptide antigen via MHC class I, TAP-independent (GO:0002480)	1/10	0.113299	0.351203	0.141817	0.447154	-1.73047	3.76848	LNPEP
cellular glucan metabolic process (GO:0006073)	1/13	0.144726	0.361844	0.176892	0.454129	-1.94819	3.76569	PYGL
positive regulation of cysteine-type endopeptidase activity involved in apoptotic process (GO:0043280)	4/110	0.0430565	0.271719	0.0731106	0.443706	-1.19356	3.75405	PYCARD;MTCH1;FAM162A;TRADD
UDP-N-acetylglucosamine metabolic process (GO:0006047)	1/13	0.144726	0.361844	0.176892	0.454129	-1.93839	3.74675	AMDHD2
regulation of histone phosphorylation (GO:0033127)	1/11	0.1239	0.351556	0.153671	0.447154	-1.79041	3.73888	MAPK3
chondroitin sulfate catabolic process (GO:0030207)	1/14	0.154953	0.368536	0.188264	0.460202	-2.00265	3.73421	HEXA
clathrin-dependent endocytosis (GO:0072583)	2/40	0.0825095	0.350895	0.114102	0.447154	-1.49296	3.72471	FCHO2;AP2A1
purine nucleobase metabolic process (GO:0006144)	1/12	0.134375	0.353572	0.165362	0.447154	-1.85207	3.71732	GDA
negative regulation of leukocyte cell-cell adhesion (GO:1903038)	1/12	0.134375	0.353572	0.165362	0.447154	-1.84808	3.70931	TNFAIP8L2
peptide metabolic process (GO:0006518)	4/105	0.0373022	0.253762	0.0641873	0.421878	-1.12657	3.70496	ETHE1;RNPEP;LNPEP;TPP1
hydrogen peroxide catabolic process (GO:0042744)	1/15	0.165058	0.372217	0.19948	0.462648	-2.0497	3.69244	PRDX6
regulation of symbiosis, encompassing mutualism through parasitism (GO:0043903)	1/12	0.134375	0.353572	0.165362	0.447154	-1.8346	3.68227	EXOC7
sarcoplasmic reticulum calcium ion transport (GO:0070296)	1/10	0.113299	0.351203	0.141817	0.447154	-1.68941	3.67908	CCR5
Wnt signaling pathway, planar cell polarity pathway (GO:0060071)	3/89	0.0908373	0.350895	0.134307	0.447154	-1.53025	3.6706	PSME4;AP2A1;RAC1
negative regulation of defense response (GO:0031348)	3/81	0.0730176	0.350895	0.110074	0.447154	-1.40113	3.66684	GBA;APOE;TNFAIP8L2
vascular endothelial growth factor receptor signaling pathway (GO:0048010)	3/71	0.0532538	0.315933	0.0825217	0.447154	-1.24923	3.6636	NCF1;PXN;RAC1
negative regulation of hormone secretion (GO:0046888)	1/14	0.154953	0.368536	0.188264	0.460202	-1.9628	3.65991	RAB11FIP5
positive regulation of locomotion (GO:0040017)	2/34	0.0621349	0.350895	0.0880007	0.447154	-1.31672	3.65845	CSF1R;CHMP2B
superoxide anion generation (GO:0042554)	1/11	0.1239	0.351556	0.153671	0.447154	-1.74751	3.64929	NCF1
negative regulation of neuron apoptotic process (GO:0043524)	3/64	0.0412144	0.266464	0.0653029	0.425019	-1.14386	3.64772	PPT1;APOE;LGMN
regulation of autophagy (GO:0010506)	6/204	0.0362204	0.249448	0.0712381	0.43726	-1.09449	3.63167	CTSA;EXOC7;GBA;PSAP;LAMTOR2;SNX6
sterol biosynthetic process (GO:0016126)	2/41	0.0860812	0.350895	0.118627	0.447154	-1.48066	3.63126	ACLY;APOE
regulation of stress-activated MAPK cascade (GO:0032872)	2/42	0.0896988	0.350895	0.123197	0.447154	-1.50518	3.62944	CARD9;MAPK3
peptide transport (GO:0015833)	2/42	0.0896988	0.350895	0.123197	0.447154	-1.50411	3.62686	RAP1A;PPT1
ESCRT III complex disassembly (GO:1904903)	1/11	0.1239	0.351556	0.153671	0.447154	-1.73507	3.6233	CHMP2B
regulation of interleukin-6 production (GO:0032675)	2/43	0.0933605	0.351203	0.127809	0.447154	-1.5228	3.61101	PYCARD;GBA
negative regulation of vascular smooth muscle cell proliferation (GO:1904706)	1/13	0.144726	0.361844	0.176892	0.454129	-1.86559	3.60603	PDCD4
positive regulation of endothelial cell chemotaxis (GO:2001028)	1/14	0.154953	0.368536	0.188264	0.460202	-1.9284	3.59576	TMSB4X
regulation of transcription of nuclear large rRNA transcript from RNA polymerase I promoter (GO:1901836)	1/13	0.144726	0.361844	0.176892	0.454129	-1.85856	3.59244	MARS
regulation of cell communication by electrical coupling (GO:0010649)	1/13	0.144726	0.361844	0.176892	0.454129	-1.85687	3.58918	SLC8A1
negative regulation of hemostasis (GO:1900047)	1/14	0.154953	0.368536	0.188264	0.460202	-1.91937	3.57892	APOE
negative regulation of cytokine production (GO:0001818)	4/111	0.0442641	0.277132	0.0749673	0.447154	-1.14506	3.56981	GBA;PDCD4;SARS;RAC1
sequestering of actin monomers (GO:0042989)	1/11	0.1239	0.351556	0.153671	0.447154	-1.70911	3.56911	TMSB4X
regulation of activation of Janus kinase activity (GO:0010533)	1/8	0.0917111	0.350895	0.117611	0.447154	-1.48879	3.55689	CD300A
alcohol catabolic process (GO:0046164)	1/12	0.134375	0.353572	0.165362	0.447154	-1.77066	3.55394	APOE
regulation of cholesterol esterification (GO:0010872)	1/12	0.134375	0.353572	0.165362	0.447154	-1.76451	3.54159	APOE
positive regulation of steroid metabolic process (GO:0045940)	1/11	0.1239	0.351556	0.153671	0.447154	-1.69559	3.54087	APOE
cofactor transport (GO:0051181)	1/16	0.175043	0.374687	0.210541	0.462648	-2.02926	3.53643	PPT1
mitochondrial genome maintenance (GO:0000002)	1/14	0.154953	0.368536	0.188264	0.460202	-1.89652	3.53632	LONP1
positive regulation of epidermal growth factor-activated receptor activity (GO:0045741)	1/11	0.1239	0.351556	0.153671	0.447154	-1.68986	3.52891	NCF1
negative regulation of epidermal growth factor-activated receptor activity (GO:0007175)	1/14	0.154953	0.368536	0.188264	0.460202	-1.89246	3.52875	SNX6
regulation of cellular amide metabolic process (GO:0034248)	2/39	0.0789853	0.350895	0.109623	0.447154	-1.38763	3.52248	CTSA;PGAM1
synaptic vesicle localization (GO:0097479)	1/14	0.154953	0.368536	0.188264	0.460202	-1.8874	3.51932	DNM2
pyrimidine nucleoside salvage (GO:0043097)	1/13	0.144726	0.361844	0.176892	0.454129	-1.81187	3.50219	UCKL1
positive regulation of mRNA splicing, via spliceosome (GO:0048026)	1/11	0.1239	0.351556	0.153671	0.447154	-1.67473	3.49731	PRDX6
cognition (GO:0050890)	2/41	0.0860812	0.350895	0.118627	0.447154	-1.42573	3.49655	CHMP2B;CBR3
glutamine family amino acid biosynthetic process (GO:0009084)	1/14	0.154953	0.368536	0.188264	0.460202	-1.87284	3.49217	ALDH18A1
negative regulation of biomineral tissue development (GO:0070168)	1/15	0.165058	0.372217	0.19948	0.462648	-1.93176	3.47998	CCR1
prostanoid biosynthetic process (GO:0046457)	1/14	0.154953	0.368536	0.188264	0.460202	-1.86356	3.47486	FAM213B
sodium ion import across plasma membrane (GO:0098719)	1/16	0.175043	0.374687	0.210541	0.462648	-1.9937	3.47447	SLC8A1
positive regulation of receptor biosynthetic process (GO:0010870)	1/12	0.134375	0.353572	0.165362	0.447154	-1.728	3.4683	CNPY2
negative regulation of cellular amide metabolic process (GO:0034249)	3/76	0.0627712	0.350895	0.0958885	0.447154	-1.24776	3.45412	CTSA;APOE;CLU
positive regulation of cell projection organization (GO:0031346)	3/64	0.0412144	0.266464	0.0653029	0.425019	-1.08118	3.44786	RAP1A;PLXNB2;APOE
regulation of actomyosin structure organization (GO:0110020)	1/13	0.144726	0.361844	0.176892	0.454129	-1.78172	3.44391	RAC1
regulation of vasculogenesis (GO:2001212)	1/13	0.144726	0.361844	0.176892	0.454129	-1.78069	3.44192	RAP1A
neuromuscular process controlling balance (GO:0050885)	1/15	0.165058	0.372217	0.19948	0.462648	-1.90809	3.43734	TPP1
pyrimidine-containing compound metabolic process (GO:0072527)	1/16	0.175043	0.374687	0.210541	0.462648	-1.97215	3.43692	UCKL1
UDP-N-acetylglucosamine biosynthetic process (GO:0006048)	1/12	0.134375	0.353572	0.165362	0.447154	-1.71119	3.43457	AMDHD2
protein polymerization (GO:0051258)	2/46	0.104596	0.351203	0.141877	0.447154	-1.51914	3.4297	CORO7;RAC1
mononuclear cell differentiation (GO:1903131)	1/12	0.134375	0.353572	0.165362	0.447154	-1.70557	3.42329	CSF1R
cholesterol catabolic process (GO:0006707)	1/10	0.113299	0.351203	0.141817	0.447154	-1.56772	3.41406	APOE
ER to Golgi vesicle-mediated transport (GO:0006888)	5/181	0.0665165	0.350895	0.115314	0.447154	-1.25891	3.41202	DYNC1LI2;DCTN1;CAPZA1;TRAPPC11;ARFGAP3
acetyl-CoA metabolic process (GO:0006084)	1/15	0.165058	0.372217	0.19948	0.462648	-1.88335	3.39277	ACLY
inositol lipid-mediated signaling (GO:0048017)	2/40	0.0825095	0.350895	0.114102	0.447154	-1.35953	3.3918	CSF1R;PIK3CD
regulation of lamellipodium morphogenesis (GO:2000392)	1/12	0.134375	0.353572	0.165362	0.447154	-1.68822	3.38845	CORO1B
regulation of steroid metabolic process (GO:0019218)	1/17	0.184909	0.379399	0.22145	0.463833	-2.0065	3.38675	APOE
negative regulation of protein metabolic process (GO:0051248)	2/44	0.0970649	0.351203	0.132461	0.447154	-1.44748	3.37607	APOE;CLU
neuron maturation (GO:0042551)	1/10	0.113299	0.351203	0.141817	0.447154	-1.54677	3.36844	MTCH1
positive regulation of stress fiber assembly (GO:0051496)	2/38	0.0755101	0.350895	0.105192	0.447154	-1.3002	3.35904	PXN;RAC1
triglyceride-rich lipoprotein particle remodeling (GO:0034370)	1/14	0.154953	0.368536	0.188264	0.460202	-1.80078	3.3578	APOE
regulation of microtubule polymerization (GO:0031113)	2/36	0.0687139	0.350895	0.0964858	0.447154	-1.25336	3.35624	DCTN1;RAC1
purine-containing compound salvage (GO:0043101)	1/15	0.165058	0.372217	0.19948	0.462648	-1.85742	3.34607	ADK
regulation of lysosomal lumen pH (GO:0035751)	1/11	0.1239	0.351556	0.153671	0.447154	-1.59709	3.33516	PPT1
cardiac muscle contraction (GO:0060048)	2/37	0.0720858	0.350895	0.100813	0.447154	-1.26637	3.33043	GAA;SLC8A1
positive regulation of endothelial cell apoptotic process (GO:2000353)	1/12	0.134375	0.353572	0.165362	0.447154	-1.657	3.32579	PDCD4
negative regulation of response to external stimulus (GO:0032102)	4/108	0.0406981	0.266464	0.0694688	0.431524	-1.03859	3.32511	GBA;CASK;APOE;TNFAIP8L2
regulation of viral life cycle (GO:1903900)	1/13	0.144726	0.361844	0.176892	0.454129	-1.72013	3.32487	NECTIN2
membrane protein proteolysis (GO:0033619)	2/36	0.0687139	0.350895	0.0964858	0.447154	-1.24104	3.32327	NAPSA;CTSH
positive regulation of protein complex disassembly (GO:0043243)	1/14	0.154953	0.368536	0.188264	0.460202	-1.76723	3.29524	GBA
cell wall macromolecule catabolic process (GO:0016998)	1/13	0.144726	0.361844	0.176892	0.454129	-1.69769	3.2815	MANBA
smooth muscle contraction (GO:0006939)	1/15	0.165058	0.372217	0.19948	0.462648	-1.81872	3.27635	SLC8A1
phospholipid efflux (GO:0033700)	1/13	0.144726	0.361844	0.176892	0.454129	-1.69173	3.26996	APOE
regulation of proteasomal ubiquitin-dependent protein catabolic process (GO:0032434)	3/89	0.0908373	0.350895	0.134307	0.447154	-1.36219	3.26745	UBXN1;CLU;CCAR2
amyloid precursor protein metabolic process (GO:0042982)	1/14	0.154953	0.368536	0.188264	0.460202	-1.75128	3.2655	APOE
regulation of Arp2/3 complex-mediated actin nucleation (GO:0034315)	1/11	0.1239	0.351556	0.153671	0.447154	-1.5601	3.25794	CORO1B
endosomal transport (GO:0016197)	6/230	0.0584933	0.335701	0.108948	0.447154	-1.14711	3.25647	PIKFYVE;DCTN1;CHMP2B;AP2A1;CORO7;SNX6
positive regulation of chemokine production (GO:0032722)	2/35	0.0653964	0.350895	0.0922144	0.447154	-1.194	3.25639	PYCARD;CSF1R
positive regulation of cholesterol efflux (GO:0010875)	1/14	0.154953	0.368536	0.188264	0.460202	-1.73758	3.23994	APOE
amino sugar biosynthetic process (GO:0046349)	1/13	0.144726	0.361844	0.176892	0.454129	-1.67457	3.2368	AMDHD2
positive regulation of actin filament bundle assembly (GO:0032233)	2/45	0.10081	0.351203	0.137151	0.447154	-1.40825	3.23124	PXN;RAC1
low-density lipoprotein receptor particle metabolic process (GO:0032799)	1/12	0.134375	0.353572	0.165362	0.447154	-1.60449	3.22041	AP2A1
clathrin coat assembly (GO:0048268)	1/15	0.165058	0.372217	0.19948	0.462648	-1.78351	3.21292	FCHO2
cellular macromolecule catabolic process (GO:0044265)	2/49	0.116174	0.351556	0.156255	0.447154	-1.48763	3.20237	MANBA;NGLY1
glycerolipid catabolic process (GO:0046503)	1/14	0.154953	0.368536	0.188264	0.460202	-1.71731	3.20215	PRDX6
positive regulation of cytoplasmic transport (GO:1903651)	1/11	0.1239	0.351556	0.153671	0.447154	-1.52917	3.19334	MTMR2
long-term memory (GO:0007616)	1/18	0.194658	0.381135	0.23221	0.463833	-1.95105	3.19291	APOE
sodium ion import (GO:0097369)	1/16	0.175043	0.374687	0.210541	0.462648	-1.82515	3.18074	SLC8A1
negative regulation of cell death (GO:0060548)	3/82	0.0751512	0.350895	0.113003	0.447154	-1.22615	3.17358	GBA;APOE;CLU
negative regulation of release of cytochrome c from mitochondria (GO:0090201)	1/16	0.175043	0.374687	0.210541	0.462648	-1.81982	3.17144	CLU
positive regulation of T cell mediated cytotoxicity (GO:0001916)	1/14	0.154953	0.368536	0.188264	0.460202	-1.70013	3.17013	NECTIN2
cholesterol transport (GO:0030301)	2/45	0.10081	0.351203	0.137151	0.447154	-1.36852	3.1401	APOE;CLU
negative regulation of cell migration involved in sprouting angiogenesis (GO:0090051)	1/15	0.165058	0.372217	0.19948	0.462648	-1.74228	3.13864	CARD10
ncRNA transcription (GO:0098781)	1/15	0.165058	0.372217	0.19948	0.462648	-1.73896	3.13267	MARS
interleukin-12-mediated signaling pathway (GO:0035722)	2/47	0.108419	0.351203	0.146638	0.447154	-1.40067	3.11194	CAPZA1;PDCD4
negative regulation of Rho protein signal transduction (GO:0035024)	1/15	0.165058	0.372217	0.19948	0.462648	-1.72709	3.11128	ARAP3
NIK/NF-kappaB signaling (GO:0038061)	3/81	0.0730176	0.350895	0.110074	0.447154	-1.18799	3.10903	CARD10;PSME4;UBA3
cell communication by electrical coupling involved in cardiac conduction (GO:0086064)	1/15	0.165058	0.372217	0.19948	0.462648	-1.72433	3.1063	SLC8A1
regulation of acetyl-CoA biosynthetic process from pyruvate (GO:0010510)	1/14	0.154953	0.368536	0.188264	0.460202	-1.6582	3.09193	DLAT
tumor necrosis factor-mediated signaling pathway (GO:0033209)	4/124	0.0616711	0.350895	0.10121	0.447154	-1.10904	3.08971	PYCARD;TMSB4X;TRADD;PSME4
retrograde transport, endosome to Golgi (GO:0042147)	3/83	0.0773123	0.350895	0.115962	0.447154	-1.20393	3.08195	PIKFYVE;DCTN1;SNX6
mitochondrial fusion (GO:0008053)	1/17	0.184909	0.379399	0.22145	0.463833	-1.80729	3.05051	STOML2
negative regulation of platelet activation (GO:0010544)	1/16	0.175043	0.374687	0.210541	0.462648	-1.74338	3.03823	APOE
positive regulation of tumor necrosis factor production (GO:0032760)	2/48	0.112279	0.351203	0.151431	0.447154	-1.3861	3.03108	PYCARD;CLU
nucleoside salvage (GO:0043174)	1/15	0.165058	0.372217	0.19948	0.462648	-1.68105	3.02833	UCKL1
mitochondrial electron transport, ubiquinol to cytochrome c (GO:0006122)	1/15	0.165058	0.372217	0.19948	0.462648	-1.67716	3.02133	UQCRC2
negative regulation of coagulation (GO:0050819)	1/16	0.175043	0.374687	0.210541	0.462648	-1.7331	3.02032	APOE
regulation of macrophage differentiation (GO:0045649)	1/14	0.154953	0.368536	0.188264	0.460202	-1.61875	3.01837	C1QC
regulation of signal transduction (GO:0009966)	6/234	0.0625127	0.350895	0.115516	0.447154	-1.08547	3.00935	CSF1R;GIT2;MTCH1;PXN;CLU;GIT1
positive regulation of natural killer cell mediated cytotoxicity (GO:0045954)	1/18	0.194658	0.381135	0.23221	0.463833	-1.83786	3.00769	NECTIN2
carboxylic acid biosynthetic process (GO:0046394)	2/45	0.10081	0.351203	0.137151	0.447154	-1.30921	3.004	GOT2;ALDH18A1
Golgi to plasma membrane transport (GO:0006893)	2/40	0.0825095	0.350895	0.114102	0.447154	-1.20332	3.0021	EXOC5;CCDC93
leukocyte differentiation (GO:0002521)	1/14	0.154953	0.368536	0.188264	0.460202	-1.60482	2.9924	RRAS
regulation of acyl-CoA biosynthetic process (GO:0050812)	1/14	0.154953	0.368536	0.188264	0.460202	-1.59421	2.97261	DLAT
negative regulation of JUN kinase activity (GO:0043508)	1/12	0.134375	0.353572	0.165362	0.447154	-1.47186	2.95419	PDCD4
ephrin receptor signaling pathway (GO:0048013)	3/83	0.0773123	0.350895	0.115962	0.447154	-1.15242	2.95008	AP2A1;RAC1;GIT1
pyrimidine nucleoside biosynthetic process (GO:0046134)	1/16	0.175043	0.374687	0.210541	0.462648	-1.6911	2.94713	UCKL1
regulation of T cell activation (GO:0050863)	2/45	0.10081	0.351203	0.137151	0.447154	-1.28312	2.94413	PYCARD;TNFAIP8L2
filopodium assembly (GO:0046847)	1/16	0.175043	0.374687	0.210541	0.462648	-1.68447	2.93557	DNM3
nicotinamide nucleotide metabolic process (GO:0046496)	2/46	0.104596	0.351203	0.141877	0.447154	-1.2987	2.93201	NAXE;PGAM1
retinoic acid metabolic process (GO:0042573)	1/16	0.175043	0.374687	0.210541	0.462648	-1.67527	2.91953	SCPEP1
ganglioside metabolic process (GO:0001573)	1/16	0.175043	0.374687	0.210541	0.462648	-1.67407	2.91743	NEU1
positive regulation of membrane protein ectodomain proteolysis (GO:0051044)	1/16	0.175043	0.374687	0.210541	0.462648	-1.67124	2.91251	APOE
negative regulation of transcription regulatory region DNA binding (GO:2000678)	1/17	0.184909	0.379399	0.22145	0.463833	-1.72384	2.90966	TMSB4X
T cell migration (GO:0072678)	1/17	0.184909	0.379399	0.22145	0.463833	-1.71588	2.89622	PIK3CD
regulation of macromolecule metabolic process (GO:0060255)	4/130	0.0707594	0.350895	0.114576	0.447154	-1.08763	2.88055	MTMR2;MTMR3;APOE;MAPK3
establishment of mitotic spindle orientation (GO:0000132)	1/15	0.165058	0.372217	0.19948	0.462648	-1.5977	2.87819	DCTN1
cellular response to pH (GO:0071467)	1/17	0.184909	0.379399	0.22145	0.463833	-1.70395	2.87607	RAB11FIP5
positive regulation of antigen receptor-mediated signaling pathway (GO:0050857)	1/17	0.184909	0.379399	0.22145	0.463833	-1.69865	2.86713	NECTIN2
steroid catabolic process (GO:0006706)	1/14	0.154953	0.368536	0.188264	0.460202	-1.53566	2.86345	HSD17B11
regulation of keratinocyte proliferation (GO:0010837)	1/19	0.20429	0.388005	0.242821	0.471358	-1.80194	2.86187	CASK
chaperone-mediated protein transport (GO:0072321)	1/11	0.1239	0.351556	0.153671	0.447154	-1.37007	2.86109	CLU
cellular response to lipopolysaccharide (GO:0071222)	3/92	0.0979442	0.351203	0.143834	0.447154	-1.23071	2.85938	PYCARD;PDCD4;CCR5
virion assembly (GO:0019068)	1/18	0.194658	0.381135	0.23221	0.463833	-1.7438	2.85375	APOE
cellular metal ion homeostasis (GO:0006875)	3/97	0.110268	0.351203	0.160187	0.447154	-1.29114	2.84675	CCR1;STOML2;SLC8A1
UV protection (GO:0009650)	1/11	0.1239	0.351556	0.153671	0.447154	-1.36302	2.84637	SDF4
regulation of organelle assembly (GO:1902115)	2/48	0.112279	0.351203	0.151431	0.447154	-1.29846	2.83943	PIKFYVE;MTMR3
cardiac muscle cell differentiation (GO:0055007)	1/16	0.175043	0.374687	0.210541	0.462648	-1.62045	2.824	SLC8A1
regulation of cellular metabolic process (GO:0031323)	2/42	0.0896988	0.350895	0.123197	0.447154	-1.16733	2.81478	ACLY;GBA
nitric oxide mediated signal transduction (GO:0007263)	1/16	0.175043	0.374687	0.210541	0.462648	-1.61094	2.80742	APOE
ribonucleoside monophosphate biosynthetic process (GO:0009156)	1/15	0.165058	0.372217	0.19948	0.462648	-1.55822	2.80706	ADK
positive regulation of stress-activated MAPK cascade (GO:0032874)	3/81	0.0730176	0.350895	0.110074	0.447154	-1.0678	2.79448	PYCARD;NCF1;CARD9
regulation of JNK cascade (GO:0046328)	3/91	0.0955506	0.351203	0.140633	0.447154	-1.18832	2.79028	PYCARD;NCF1;CARD9
positive regulation of nitric-oxide synthase activity (GO:0051000)	1/17	0.184909	0.379399	0.22145	0.463833	-1.64735	2.78055	APOE
pyrimidine-containing compound salvage (GO:0008655)	1/13	0.144726	0.361844	0.176892	0.454129	-1.43255	2.76899	UCKL1
negative regulation of response to wounding (GO:1903035)	1/17	0.184909	0.379399	0.22145	0.463833	-1.63196	2.75458	CASK
calcium ion homeostasis (GO:0055074)	3/88	0.0885182	0.350895	0.131182	0.447154	-1.13363	2.74854	CCR1;STOML2;SLC8A1
positive regulation of phosphoprotein phosphatase activity (GO:0032516)	1/16	0.175043	0.374687	0.210541	0.462648	-1.57302	2.74134	CD300A
hyaluronan catabolic process (GO:0030214)	1/17	0.184909	0.379399	0.22145	0.463833	-1.6221	2.73793	HEXA
oxidative phosphorylation (GO:0006119)	1/12	0.134375	0.353572	0.165362	0.447154	-1.36211	2.73391	UQCRC2
positive regulation of immune system process (GO:0002684)	1/17	0.184909	0.379399	0.22145	0.463833	-1.61803	2.73106	PIK3CD
positive regulation of metabolic process (GO:0009893)	1/19	0.20429	0.388005	0.242821	0.471358	-1.71508	2.72391	ACLY
macrophage activation (GO:0042116)	1/18	0.194658	0.381135	0.23221	0.463833	-1.6627	2.72102	CLU
high-density lipoprotein particle assembly (GO:0034380)	1/14	0.154953	0.368536	0.188264	0.460202	-1.45613	2.71515	APOE
response to cholesterol (GO:0070723)	1/16	0.175043	0.374687	0.210541	0.462648	-1.55411	2.70838	CCR5
cellular response to interleukin-12 (GO:0071349)	2/47	0.108419	0.351203	0.146638	0.447154	-1.21758	2.70515	CAPZA1;PDCD4
positive regulation of cytosolic calcium ion concentration (GO:0007204)	4/134	0.0771785	0.350895	0.123897	0.447154	-1.05403	2.70004	CCR1;ITPR3;CCR5;SLC8A1
epithelial cell-cell adhesion (GO:0090136)	1/12	0.134375	0.353572	0.165362	0.447154	-1.33379	2.67707	SERPINB8
insulin secretion (GO:0030073)	1/19	0.20429	0.388005	0.242821	0.471358	-1.68194	2.67129	RAB11FIP5
purine-containing compound catabolic process (GO:0072523)	1/15	0.165058	0.372217	0.19948	0.462648	-1.47869	2.6638	GDA
cellular response to molecule of bacterial origin (GO:0071219)	3/85	0.0817155	0.350895	0.121967	0.447154	-1.05491	2.64204	PYCARD;PDCD4;CCR5
cardiac epithelial to mesenchymal transition (GO:0060317)	1/17	0.184909	0.379399	0.22145	0.463833	-1.55909	2.63158	PDCD4
mitochondrial gene expression (GO:0140053)	2/46	0.104596	0.351203	0.141877	0.447154	-1.16462	2.62931	GFM2;TFAM
organic substance transport (GO:0071702)	3/88	0.0885182	0.350895	0.131182	0.447154	-1.08355	2.62711	SCP2;ABCA3;PSAP
glutamine family amino acid catabolic process (GO:0009065)	1/17	0.184909	0.379399	0.22145	0.463833	-1.55388	2.62278	ALDH4A1
regulation of immune effector process (GO:0002697)	3/115	0.158968	0.372217	0.222995	0.463833	-1.42414	2.61907	C1QA;CLU;C1QC
positive regulation of cyclic nucleotide biosynthetic process (GO:0030804)	1/19	0.20429	0.388005	0.242821	0.471358	-1.64667	2.61526	APOE
negative regulation of ERAD pathway (GO:1904293)	1/13	0.144726	0.361844	0.176892	0.454129	-1.35228	2.61384	UBXN1
positive regulation of peptidyl-lysine acetylation (GO:2000758)	1/16	0.175043	0.374687	0.210541	0.462648	-1.49961	2.61341	MAPK3
regulation of establishment of planar polarity (GO:0090175)	3/90	0.0931815	0.351203	0.137457	0.447154	-1.10084	2.61253	PSME4;AP2A1;RAC1
selective autophagy (GO:0061912)	1/16	0.175043	0.374687	0.210541	0.462648	-1.49787	2.61038	WDFY3
negative regulation of interleukin-8 production (GO:0032717)	1/18	0.194658	0.381135	0.23221	0.463833	-1.58886	2.60019	TMSB4X
NAD biosynthesis via nicotinamide riboside salvage pathway (GO:0034356)	1/16	0.175043	0.374687	0.210541	0.462648	-1.49094	2.59829	NAXE
positive regulation of osteoclast differentiation (GO:0045672)	1/15	0.165058	0.372217	0.19948	0.462648	-1.44128	2.59641	CCR1
regulation of actin nucleation (GO:0051125)	1/17	0.184909	0.379399	0.22145	0.463833	-1.53701	2.5943	CORO1B
positive regulation of interleukin-8 secretion (GO:2000484)	1/15	0.165058	0.372217	0.19948	0.462648	-1.4373	2.58924	PYCARD
postsynaptic membrane organization (GO:0001941)	1/17	0.184909	0.379399	0.22145	0.463833	-1.53312	2.58773	APOE
mitochondrial respiratory chain complex assembly (GO:0033108)	3/98	0.112802	0.351203	0.163523	0.447154	-1.18545	2.58679	NDUFB4;NDUFS5;NDUFB3
establishment of mitotic spindle localization (GO:0040001)	1/19	0.20429	0.388005	0.242821	0.471358	-1.62469	2.58035	DCTN1
negative regulation of I-kappaB kinase/NF-kappaB signaling (GO:0043124)	2/48	0.112279	0.351203	0.151431	0.447154	-1.17728	2.57443	PYCARD;TMSB4X
regulation of cell junction assembly (GO:1901888)	1/16	0.175043	0.374687	0.210541	0.462648	-1.47535	2.57113	RAP1A
lipid homeostasis (GO:0055088)	2/50	0.120104	0.351556	0.161108	0.447154	-1.20899	2.56233	ACOX3;APOE
steroid metabolic process (GO:0008202)	3/100	0.117935	0.351556	0.170259	0.454129	-1.19628	2.5572	SCP2;HSD17B4;LGMN
regulation of cellular protein metabolic process (GO:0032268)	2/51	0.124065	0.351556	0.165989	0.447154	-1.22485	2.55619	GBA;APOE
pattern recognition receptor signaling pathway (GO:0002221)	2/49	0.116174	0.351556	0.156255	0.447154	-1.18598	2.55301	CTSB;LGMN
cytoplasmic sequestering of transcription factor (GO:0042994)	1/17	0.184909	0.379399	0.22145	0.463833	-1.5116	2.55141	TMSB4X
positive regulation of epithelial cell apoptotic process (GO:1904037)	1/17	0.184909	0.379399	0.22145	0.463833	-1.51088	2.5502	PDCD4
positive regulation of stress-activated protein kinase signaling cascade (GO:0070304)	1/16	0.175043	0.374687	0.210541	0.462648	-1.46277	2.5492	CARD9
negative regulation of NF-kappaB import into nucleus (GO:0042347)	1/17	0.184909	0.379399	0.22145	0.463833	-1.51007	2.54883	TMSB4X
regulation of inflammatory response (GO:0050727)	5/167	0.0504293	0.302576	0.0900542	0.447154	-0.852284	2.54593	TMSB4X;GBA;PDCD4;APOE;TNFAIP8L2
regulation of blood vessel endothelial cell migration (GO:0043535)	2/51	0.124065	0.351556	0.165989	0.447154	-1.21937	2.54477	TMSB4X;APOE
regulation of cholesterol efflux (GO:0010874)	1/19	0.20429	0.388005	0.242821	0.471358	-1.60169	2.54383	APOE
ATP synthesis coupled proton transport (GO:0015986)	1/28	0.28598	0.441488	0.331989	0.519634	-2.02178	2.53094	STOML2
anion homeostasis (GO:0055081)	1/19	0.20429	0.388005	0.242821	0.471358	-1.59142	2.52752	APOE
regulation of heart contraction (GO:0008016)	3/96	0.107757	0.351203	0.156871	0.447154	-1.12593	2.50843	TMEM65;ITPR3;SLC8A1
cardiac ventricle development (GO:0003231)	1/17	0.184909	0.379399	0.22145	0.463833	-1.48305	2.50323	TMEM65
rRNA transcription (GO:0009303)	1/17	0.184909	0.379399	0.22145	0.463833	-1.47977	2.49769	MARS
negative regulation of fibroblast proliferation (GO:0048147)	1/19	0.20429	0.388005	0.242821	0.471358	-1.571	2.49508	CD300A
positive regulation of ERK1 and ERK2 cascade (GO:0070374)	5/202	0.0953857	0.351203	0.158733	0.447154	-1.05282	2.47394	CCR1;PYCARD;CSF1R;RAP1A;MAPK3
regulation of neuron migration (GO:2001222)	1/20	0.213808	0.395183	0.253286	0.478765	-1.60076	2.46945	PLXNB2
negative regulation of intracellular transport (GO:0032387)	1/18	0.194658	0.381135	0.23221	0.463833	-1.50823	2.46823	CD300A
regulation of cytokine-mediated signaling pathway (GO:0001959)	3/91	0.0955506	0.351203	0.140633	0.447154	-1.05069	2.46713	PYCARD;RNASEL;TRADD
regulation of calcium ion transport (GO:0051924)	2/53	0.132081	0.353572	0.175825	0.454129	-1.21802	2.46568	CCR1;IL16
vitamin D metabolic process (GO:0042359)	1/16	0.175043	0.374687	0.210541	0.462648	-1.40065	2.44095	LGMN
positive regulation of monocyte chemotaxis (GO:0090026)	1/18	0.194658	0.381135	0.23221	0.463833	-1.49054	2.43929	CCR1
regulation of bone mineralization (GO:0030500)	2/51	0.124065	0.351556	0.165989	0.447154	-1.16817	2.43792	CCR1;SLC8A1
protein deacylation (GO:0035601)	1/17	0.184909	0.379399	0.22145	0.463833	-1.44314	2.43586	PPT1
heart contraction (GO:0060047)	2/45	0.10081	0.351203	0.137151	0.447154	-1.05654	2.42424	GAA;SLC8A1
transcription from mitochondrial promoter (GO:0006390)	1/13	0.144726	0.361844	0.176892	0.454129	-1.2519	2.41982	TFAM
negative regulation of lymphocyte activation (GO:0051250)	1/20	0.213808	0.395183	0.253286	0.478765	-1.56719	2.41766	TNFAIP8L2
cellular response to tumor necrosis factor (GO:0071356)	5/195	0.0851438	0.350895	0.143575	0.447154	-0.977174	2.40718	PYCARD;TMSB4X;TRADD;GBA;PSME4
nucleotide-sugar biosynthetic process (GO:0009226)	1/20	0.213808	0.395183	0.253286	0.478765	-1.55098	2.39267	AMDHD2
regulation of protein activation cascade (GO:2000257)	3/109	0.142053	0.361844	0.201482	0.462648	-1.22491	2.39048	C1QA;CLU;C1QC
high-density lipoprotein particle remodeling (GO:0034375)	1/18	0.194658	0.381135	0.23221	0.463833	-1.45404	2.37955	APOE
regulation of neuron apoptotic process (GO:0043523)	3/90	0.0931815	0.351203	0.137457	0.447154	-1.00063	2.3747	PPT1;APOE;LGMN
phospholipid catabolic process (GO:0009395)	1/18	0.194658	0.381135	0.23221	0.463833	-1.45098	2.37454	PRDX6
regulation of antigen receptor-mediated signaling pathway (GO:0050854)	1/13	0.144726	0.361844	0.176892	0.454129	-1.22772	2.37308	CD300A
positive regulation of cysteine-type endopeptidase activity involved in apoptotic signaling pathway (GO:2001269)	1/16	0.175043	0.374687	0.210541	0.462648	-1.36167	2.37302	TRADD
regulation of long-term synaptic potentiation (GO:1900271)	1/20	0.213808	0.395183	0.253286	0.478765	-1.53777	2.37228	APOE
membrane fusion (GO:0061025)	2/55	0.140212	0.361844	0.185751	0.460202	-1.20648	2.37025	DNM3;DNM2
positive regulation of blood vessel diameter (GO:0097755)	1/15	0.165058	0.372217	0.19948	0.462648	-1.31551	2.36983	SCPEP1
aspartate family amino acid catabolic process (GO:0009068)	1/20	0.213808	0.395183	0.253286	0.478765	-1.52954	2.35959	GOT2
cellular sodium ion homeostasis (GO:0006883)	1/16	0.175043	0.374687	0.210541	0.462648	-1.35043	2.35343	SLC8A1
plasma membrane bounded cell projection morphogenesis (GO:0120039)	2/53	0.132081	0.353572	0.175825	0.454129	-1.16121	2.35069	RAC1;DNM2
cellular protein complex assembly (GO:0043623)	4/145	0.0962653	0.351203	0.151092	0.447154	-1.00421	2.35051	FCHO2;PXN;LONP1;CLU
regulation of Golgi organization (GO:1903358)	1/15	0.165058	0.372217	0.19948	0.462648	-1.29715	2.33676	MAPK3
positive regulation of focal adhesion assembly (GO:0051894)	1/18	0.194658	0.381135	0.23221	0.463833	-1.42604	2.33372	RAC1
activation of NF-kappaB-inducing kinase activity (GO:0007250)	1/17	0.184909	0.379399	0.22145	0.463833	-1.38131	2.33149	CARD10
negative regulation of B cell activation (GO:0050869)	1/18	0.194658	0.381135	0.23221	0.463833	-1.42298	2.32872	CD300A
myeloid dendritic cell activation (GO:0001773)	1/15	0.165058	0.372217	0.19948	0.462648	-1.29227	2.32797	PYCARD
receptor internalization (GO:0031623)	2/51	0.124065	0.351556	0.165989	0.447154	-1.11511	2.32717	DNM3;DNM2
positive regulation of leukocyte activation (GO:0002696)	1/17	0.184909	0.379399	0.22145	0.463833	-1.37222	2.31616	NECTIN2
positive regulation of p38MAPK cascade (GO:1900745)	1/19	0.20429	0.388005	0.242821	0.471358	-1.45704	2.3141	NCF1
negative regulation of immune effector process (GO:0002698)	1/17	0.184909	0.379399	0.22145	0.463833	-1.36934	2.31129	CD300A
neuromuscular process (GO:0050905)	1/17	0.184909	0.379399	0.22145	0.463833	-1.36448	2.30309	TPP1
release of cytochrome c from mitochondria (GO:0001836)	1/19	0.20429	0.388005	0.242821	0.471358	-1.44868	2.30081	CLU
regulation of platelet activation (GO:0010543)	1/20	0.213808	0.395183	0.253286	0.478765	-1.48945	2.29774	APOE
endothelial cell development (GO:0001885)	1/20	0.213808	0.395183	0.253286	0.478765	-1.48527	2.29128	RAP1A
regulation of cell migration (GO:0030334)	7/317	0.0869072	0.350895	0.161822	0.447154	-0.930373	2.27282	CCR1;CSF1R;ARAP3;CTSH;PIK3CD;PLXNB2;RAC1
epithelial cell differentiation (GO:0030855)	3/97	0.110268	0.351203	0.160187	0.447154	-1.03001	2.271	TPP1;CTSB;PCK2
Rac protein signal transduction (GO:0016601)	1/20	0.213808	0.395183	0.253286	0.478765	-1.47042	2.26839	RAC1
positive regulation of mRNA processing (GO:0050685)	1/17	0.184909	0.379399	0.22145	0.463833	-1.34099	2.26344	PRDX6
glycerophospholipid biosynthetic process (GO:0046474)	4/165	0.135942	0.35651	0.205539	0.462648	-1.13395	2.26282	MTMR2;PIKFYVE;MTMR3;PIK3CD
regulation of cytosolic calcium ion concentration (GO:0051480)	4/138	0.0838795	0.350895	0.133529	0.447154	-0.911103	2.25805	CCR1;ITPR3;CCR5;SLC8A1
regulation of humoral immune response (GO:0002920)	3/114	0.156106	0.370168	0.219377	0.463833	-1.21374	2.25418	C1QA;CLU;C1QC
positive regulation of T cell migration (GO:2000406)	1/21	0.223213	0.403617	0.263607	0.487797	-1.50063	2.25039	PYCARD
prostaglandin biosynthetic process (GO:0001516)	1/19	0.20429	0.388005	0.242821	0.471358	-1.41652	2.24974	FAM213B
nucleoside triphosphate metabolic process (GO:0009141)	1/15	0.165058	0.372217	0.19948	0.462648	-1.2479	2.24805	SMPDL3A
negative regulation of steroid biosynthetic process (GO:0010894)	1/17	0.184909	0.379399	0.22145	0.463833	-1.3314	2.24726	APOE
regulation of adaptive immune response (GO:0002819)	1/15	0.165058	0.372217	0.19948	0.462648	-1.24086	2.23535	PYCARD
osteoclast differentiation (GO:0030316)	1/20	0.213808	0.395183	0.253286	0.478765	-1.44622	2.23105	CSF1R
heterocycle biosynthetic process (GO:0018130)	1/18	0.194658	0.381135	0.23221	0.463833	-1.36182	2.22863	ALDH18A1
establishment of endothelial barrier (GO:0061028)	1/22	0.232505	0.408301	0.273787	0.490586	-1.51826	2.2149	RAP1A
positive regulation of interleukin-6 secretion (GO:2000778)	1/18	0.194658	0.381135	0.23221	0.463833	-1.35311	2.21437	PYCARD
cell projection assembly (GO:0030031)	1/21	0.223213	0.403617	0.263607	0.487797	-1.47076	2.20559	RAC1
regulation of protein metabolic process (GO:0051246)	2/60	0.160976	0.372217	0.210879	0.462648	-1.20713	2.20481	GBA;APOE
response to tumor necrosis factor (GO:0034612)	3/98	0.112802	0.351203	0.163523	0.447154	-1.00365	2.19008	PYCARD;YTHDC2;GBA
Golgi vesicle transport (GO:0048193)	6/272	0.108585	0.351203	0.187041	0.460202	-0.985117	2.18718	DYNC1LI2;DCTN1;CAPZA1;TRAPPC11;EXOC5;ARFGAP3
protein oligomerization (GO:0051259)	5/218	0.121011	0.351556	0.195643	0.462648	-1.0352	2.18622	STOML2;PEX11B;LONP1;TRAPPC11;ITPR3
myeloid leukocyte differentiation (GO:0002573)	2/51	0.124065	0.351556	0.165989	0.447154	-1.04757	2.18622	CSF1R;PIK3CD
positive regulation of biosynthetic process (GO:0009891)	1/23	0.241687	0.411647	0.283826	0.494045	-1.53876	2.18521	APOE
non-motile cilium assembly (GO:1905515)	1/22	0.232505	0.408301	0.273787	0.490586	-1.49456	2.18033	DCTN1
regulation of cellular response to growth factor stimulus (GO:0090287)	1/19	0.20429	0.388005	0.242821	0.471358	-1.37176	2.17864	CASK
regulation of B cell receptor signaling pathway (GO:0050855)	1/18	0.194658	0.381135	0.23221	0.463833	-1.32955	2.17583	CD300A
regulation of tumor necrosis factor-mediated signaling pathway (GO:0010803)	2/57	0.148447	0.368536	0.195754	0.462648	-1.13854	2.17179	PYCARD;TRADD
positive regulation of cyclase activity (GO:0031281)	1/13	0.144726	0.361844	0.176892	0.454129	-1.12191	2.16856	MAPK3
positive regulation of nitrogen compound metabolic process (GO:0051173)	1/18	0.194658	0.381135	0.23221	0.463833	-1.32307	2.16521	GBA
positive regulation of actin filament polymerization (GO:0030838)	2/52	0.128059	0.353572	0.170895	0.454129	-1.04988	2.15778	PYCARD;RAC1
positive regulation of angiogenesis (GO:0045766)	3/104	0.128455	0.353572	0.183962	0.460202	-1.04934	2.15343	RRAS;ANXA3;CTSH
regulation of ERK1 and ERK2 cascade (GO:0070372)	6/248	0.0778374	0.350895	0.140022	0.447154	-0.84306	2.15244	CCR1;PYCARD;CSF1R;RAP1A;RRAS;MAPK3
purine nucleotide catabolic process (GO:0006195)	1/15	0.165058	0.372217	0.19948	0.462648	-1.19473	2.15226	GDA
negative regulation of cellular component organization (GO:0051129)	2/55	0.140212	0.361844	0.185751	0.460202	-1.09264	2.1466	MTMR2;DNM2
regulation of ERBB signaling pathway (GO:1901184)	1/23	0.241687	0.411647	0.283826	0.494045	-1.50419	2.13612	LGMN
protein import (GO:0017038)	2/57	0.148447	0.368536	0.195754	0.462648	-1.11602	2.12883	APOE;CLU
viral process (GO:0016032)	5/221	0.126144	0.353572	0.202879	0.462648	-1.02523	2.12257	CHMP2B;AP1B1;AP2A1;APOE;RAC1
cellular response to alkaloid (GO:0071312)	1/22	0.232505	0.408301	0.273787	0.490586	-1.45044	2.11596	SLC8A1
positive regulation of lymphocyte migration (GO:2000403)	1/18	0.194658	0.381135	0.23221	0.463833	-1.292	2.11437	PYCARD
folic acid-containing compound metabolic process (GO:0006760)	1/24	0.250759	0.415483	0.293727	0.496547	-1.52262	2.10619	GGH
positive regulation of interleukin-10 production (GO:0032733)	1/23	0.241687	0.411647	0.283826	0.494045	-1.48186	2.10441	PYCARD
negative regulation of protein tyrosine kinase activity (GO:0061099)	1/22	0.232505	0.408301	0.273787	0.490586	-1.44168	2.10319	SNX6
synaptic vesicle transport (GO:0048489)	1/18	0.194658	0.381135	0.23221	0.463833	-1.27968	2.09422	DNM2
nucleobase-containing compound biosynthetic process (GO:0034654)	1/18	0.194658	0.381135	0.23221	0.463833	-1.27799	2.09144	ADK
positive regulation of natural killer cell mediated immunity (GO:0002717)	1/18	0.194658	0.381135	0.23221	0.463833	-1.27688	2.08962	NECTIN2
glucan biosynthetic process (GO:0009250)	1/19	0.20429	0.388005	0.242821	0.471358	-1.3142	2.08722	PGM2L1
regulation of cellular component organization (GO:0051128)	4/141	0.0890864	0.350895	0.140949	0.447154	-0.860485	2.08078	RAP1A;AAK1;UNC119;LAMTOR2
negative regulation of smooth muscle cell migration (GO:0014912)	1/15	0.165058	0.372217	0.19948	0.462648	-1.15233	2.07588	CORO1B
phosphatidylethanolamine metabolic process (GO:0046337)	1/21	0.223213	0.403617	0.263607	0.487797	-1.38343	2.07464	PLA2G15
cellular response to glucocorticoid stimulus (GO:0071385)	1/18	0.194658	0.381135	0.23221	0.463833	-1.26271	2.06644	PCK2
positive regulation of dendritic spine development (GO:0060999)	1/21	0.223213	0.403617	0.263607	0.487797	-1.37593	2.06339	APOE
energy reserve metabolic process (GO:0006112)	1/22	0.232505	0.408301	0.273787	0.490586	-1.40895	2.05544	PYGL
hydrogen peroxide metabolic process (GO:0042743)	1/21	0.223213	0.403617	0.263607	0.487797	-1.36718	2.05027	PRDX6
positive regulation of mononuclear cell migration (GO:0071677)	1/20	0.213808	0.395183	0.253286	0.478765	-1.32339	2.04156	CCR1
regulation of spindle organization (GO:0090224)	1/19	0.20429	0.388005	0.242821	0.471358	-1.27861	2.0307	DCTN1
cell morphogenesis (GO:0000902)	2/60	0.160976	0.372217	0.210879	0.462648	-1.10922	2.02599	RAC1;CLU
regulation of programmed cell death (GO:0043067)	6/269	0.10444	0.351203	0.180848	0.460202	-0.89536	2.02275	AIFM2;TRADD;DIP2A;HS1BP3;CLU;CTSB
positive regulation of telomere capping (GO:1904355)	1/18	0.194658	0.381135	0.23221	0.463833	-1.23553	2.02196	MAPK3
regulation of proteolysis involved in cellular protein catabolic process (GO:1903050)	1/24	0.250759	0.415483	0.293727	0.496547	-1.46031	2.02	GBA
intrinsic apoptotic signaling pathway in response to DNA damage by p53 class mediator (GO:0042771)	1/21	0.223213	0.403617	0.263607	0.487797	-1.344	2.0155	PYCARD
positive regulation of ATP metabolic process (GO:1903580)	1/24	0.250759	0.415483	0.293727	0.496547	-1.44586	2.00001	TMSB4X
purine nucleotide metabolic process (GO:0006163)	1/21	0.223213	0.403617	0.263607	0.487797	-1.3331	1.99917	GDA
hyaluronan metabolic process (GO:0030212)	1/22	0.232505	0.408301	0.273787	0.490586	-1.36641	1.99337	HEXA
sterol transport (GO:0015918)	1/22	0.232505	0.408301	0.273787	0.490586	-1.36263	1.98786	OSBP
regulation of lamellipodium organization (GO:1902743)	1/18	0.194658	0.381135	0.23221	0.463833	-1.21405	1.9868	RAC1
regulation of lamellipodium assembly (GO:0010591)	1/26	0.26858	0.42714	0.313123	0.507423	-1.50996	1.985	RAC1
regulation of protein complex disassembly (GO:0043244)	1/16	0.175043	0.374687	0.210541	0.462648	-1.13266	1.97392	GBA
JAK-STAT cascade involved in growth hormone signaling pathway (GO:0060397)	1/16	0.175043	0.374687	0.210541	0.462648	-1.13173	1.97229	MAPK3
membrane depolarization during cardiac muscle cell action potential (GO:0086012)	1/18	0.194658	0.381135	0.23221	0.463833	-1.20337	1.96933	SLC8A1
autophagy of nucleus (GO:0044804)	1/21	0.223213	0.403617	0.263607	0.487797	-1.31301	1.96903	WDR45B
negative regulation of macromolecule biosynthetic process (GO:0010558)	1/21	0.223213	0.403617	0.263607	0.487797	-1.31281	1.96873	AP2A1
cellular response to hexose stimulus (GO:0071331)	1/22	0.232505	0.408301	0.273787	0.490586	-1.34632	1.96407	PCK2
phosphatidylinositol-mediated signaling (GO:0048015)	2/57	0.148447	0.368536	0.195754	0.462648	-1.02676	1.95857	CSF1R;PIK3CD
regulation of cytokine production involved in inflammatory response (GO:1900015)	1/23	0.241687	0.411647	0.283826	0.494045	-1.37498	1.95262	PDCD4
regulation of necroptotic process (GO:0060544)	1/17	0.184909	0.379399	0.22145	0.463833	-1.15501	1.94954	TRADD
cellular monovalent inorganic cation homeostasis (GO:0030004)	1/18	0.194658	0.381135	0.23221	0.463833	-1.18563	1.9403	SLC8A1
establishment of spindle orientation (GO:0051294)	1/22	0.232505	0.408301	0.273787	0.490586	-1.32857	1.93817	DCTN1
regulation of DNA-templated transcription, elongation (GO:0032784)	1/21	0.223213	0.403617	0.263607	0.487797	-1.29083	1.93576	CCAR2
regulation of cardiac muscle contraction by calcium ion signaling (GO:0010882)	1/22	0.232505	0.408301	0.273787	0.490586	-1.32596	1.93436	SLC8A1
purine-containing compound biosynthetic process (GO:0072522)	1/23	0.241687	0.411647	0.283826	0.494045	-1.35994	1.93127	ADK
fatty acid metabolic process (GO:0006631)	3/107	0.136557	0.357531	0.194426	0.462648	-0.96706	1.92543	PLA2G15;ACLY;ACOT8
regulation of viral release from host cell (GO:1902186)	1/26	0.26858	0.42714	0.313123	0.507423	-1.4635	1.92393	CHMP2B
apoptotic process (GO:0006915)	5/232	0.145794	0.363681	0.230142	0.463833	-0.997688	1.92111	PYCARD;YARS;AIFM2;TRADD;PDCD4
regulation of mitotic spindle assembly (GO:1901673)	1/20	0.213808	0.395183	0.253286	0.478765	-1.23745	1.90898	CHMP2B
metanephros development (GO:0001656)	1/24	0.250759	0.415483	0.293727	0.496547	-1.37533	1.90245	CTSH
positive regulation of histone acetylation (GO:0035066)	1/22	0.232505	0.408301	0.273787	0.490586	-1.30179	1.89911	MAPK3
sulfur amino acid metabolic process (GO:0000096)	1/23	0.241687	0.411647	0.283826	0.494045	-1.32432	1.88069	PCYOX1
protein targeting to lysosome (GO:0006622)	1/20	0.213808	0.395183	0.253286	0.478765	-1.21557	1.87523	CLU
negative regulation of double-strand break repair (GO:2000780)	1/20	0.213808	0.395183	0.253286	0.478765	-1.21237	1.87029	OTUB1
negative regulation of antigen receptor-mediated signaling pathway (GO:0050858)	1/18	0.194658	0.381135	0.23221	0.463833	-1.13603	1.85913	CD300A
positive regulation of transcription from RNA polymerase I promoter (GO:0045943)	1/22	0.232505	0.408301	0.273787	0.490586	-1.27248	1.85634	MARS
positive regulation of neuron projection development (GO:0010976)	3/98	0.112802	0.351203	0.163523	0.447154	-0.84979	1.85435	RAP1A;PLXNB2;APOE
IRE1-mediated unfolded protein response (GO:0036498)	2/58	0.152601	0.368536	0.200781	0.462648	-0.983508	1.84892	DCTN1;TPP1
positive regulation of canonical Wnt signaling pathway (GO:0090263)	3/114	0.156106	0.370168	0.219377	0.463833	-0.995426	1.84872	USP8;PSME4;CCAR2
negative regulation of actin filament polymerization (GO:0030837)	1/23	0.241687	0.411647	0.283826	0.494045	-1.30028	1.84655	TMSB4X
negative regulation of sprouting angiogenesis (GO:1903671)	1/23	0.241687	0.411647	0.283826	0.494045	-1.2997	1.84573	CARD10
regulation of membrane protein ectodomain proteolysis (GO:0051043)	1/23	0.241687	0.411647	0.283826	0.494045	-1.29901	1.84474	APOE
regulation of complement activation (GO:0030449)	3/110	0.144829	0.361844	0.205033	0.462648	-0.954721	1.84471	C1QA;CLU;C1QC
nucleotide catabolic process (GO:0009166)	1/18	0.194658	0.381135	0.23221	0.463833	-1.12485	1.84083	GDA
positive regulation of neuron differentiation (GO:0045666)	3/99	0.115358	0.351556	0.166881	0.448793	-0.848957	1.83351	RAP1A;PLXNB2;APOE
NADP metabolic process (GO:0006739)	1/20	0.213808	0.395183	0.253286	0.478765	-1.18798	1.83267	NAXE
regulation of cell motility (GO:2000145)	3/110	0.144829	0.361844	0.205033	0.462648	-0.946128	1.82811	CSF1R;PLXNB2;RAC1
positive regulation of cell morphogenesis involved in differentiation (GO:0010770)	2/59	0.156778	0.370651	0.205823	0.462648	-0.979744	1.81539	PLXNB2;RAC1
positive regulation of cation transmembrane transport (GO:1904064)	1/18	0.194658	0.381135	0.23221	0.463833	-1.09977	1.79979	TMSB4X
striated muscle cell development (GO:0055002)	1/21	0.223213	0.403617	0.263607	0.487797	-1.19549	1.7928	SLC8A1
positive regulation of neutrophil migration (GO:1902624)	1/26	0.26858	0.42714	0.313123	0.507423	-1.36174	1.79015	RAC1
regulation of peptidase activity (GO:0052547)	1/19	0.20429	0.388005	0.242821	0.471358	-1.1207	1.77991	CTSH
vacuolar acidification (GO:0007035)	1/21	0.223213	0.403617	0.263607	0.487797	-1.18591	1.77842	PPT1
triglyceride catabolic process (GO:0019433)	1/23	0.241687	0.411647	0.283826	0.494045	-1.25189	1.77783	APOE
sensory perception of pain (GO:0019233)	1/25	0.259723	0.422383	0.303492	0.504441	-1.31238	1.76927	NIPSNAP1
positive regulation of cellular component movement (GO:0051272)	1/22	0.232505	0.408301	0.273787	0.490586	-1.21178	1.76779	CSF1R
Ras protein signal transduction (GO:0007265)	5/224	0.131375	0.353572	0.210204	0.462648	-0.869581	1.76499	USP8;RAP1A;RRAS;RAB24;RAC1
cellular nitrogen compound biosynthetic process (GO:0044271)	1/24	0.250759	0.415483	0.293727	0.496547	-1.2753	1.76407	GBA
mitotic cytokinesis (GO:0000281)	2/60	0.160976	0.372217	0.210879	0.462648	-0.964158	1.76103	USP8;UNC119
mitochondrial RNA metabolic process (GO:0000959)	1/21	0.223213	0.403617	0.263607	0.487797	-1.17281	1.75878	TFAM
positive regulation of endopeptidase activity (GO:0010950)	1/25	0.259723	0.422383	0.303492	0.504441	-1.29852	1.75058	PYCARD
cellular response to ammonium ion (GO:0071242)	1/24	0.250759	0.415483	0.293727	0.496547	-1.25433	1.73507	MAPK3
phospholipid transport (GO:0015914)	2/59	0.156778	0.370651	0.205823	0.462648	-0.935685	1.73375	SCP2;APOE
positive regulation of activated T cell proliferation (GO:0042104)	1/20	0.213808	0.395183	0.253286	0.478765	-1.11859	1.72562	PYCARD
regulation of neuronal synaptic plasticity (GO:0048168)	1/25	0.259723	0.422383	0.303492	0.504441	-1.26577	1.70643	APOE
long-chain fatty acid transport (GO:0015909)	1/26	0.26858	0.42714	0.313123	0.507423	-1.29641	1.70427	APOE
regulation of natural killer cell mediated cytotoxicity (GO:0042269)	1/23	0.241687	0.411647	0.283826	0.494045	-1.19716	1.7001	NECTIN2
cellular response to epidermal growth factor stimulus (GO:0071364)	1/26	0.26858	0.42714	0.313123	0.507423	-1.29042	1.69639	MARS
regulation of telomere capping (GO:1904353)	1/24	0.250759	0.415483	0.293727	0.496547	-1.22569	1.69545	MAPK3
regulation of cholesterol transport (GO:0032374)	1/21	0.223213	0.403617	0.263607	0.487797	-1.12908	1.6932	APOE
second-messenger-mediated signaling (GO:0019932)	2/63	0.173689	0.374687	0.226115	0.463833	-0.967191	1.69306	APOE;CCR5
regulation of tumor necrosis factor production (GO:0032680)	2/62	0.169432	0.374687	0.221026	0.463833	-0.953549	1.69284	PYCARD;CLU
neurotrophin signaling pathway (GO:0038179)	1/18	0.194658	0.381135	0.23221	0.463833	-1.03413	1.69236	RAP1A
triglyceride biosynthetic process (GO:0019432)	1/20	0.213808	0.395183	0.253286	0.478765	-1.09347	1.68687	PCK2
tRNA processing (GO:0008033)	2/63	0.173689	0.374687	0.226115	0.463833	-0.962083	1.68412	SARS;AARS
acylglycerol homeostasis (GO:0055090)	1/23	0.241687	0.411647	0.283826	0.494045	-1.18553	1.68359	APOE
cellular response to starvation (GO:0009267)	3/108	0.139296	0.361844	0.197946	0.462648	-0.853379	1.68214	MTMR3;MARS;MAPK3
proteasomal ubiquitin-independent protein catabolic process (GO:0010499)	1/25	0.259723	0.422383	0.303492	0.504441	-1.24387	1.6769	PSME4
regulation of viral entry into host cell (GO:0046596)	1/27	0.277332	0.435808	0.322621	0.5136	-1.30538	1.6742	NECTIN2
positive regulation of interleukin-1 beta secretion (GO:0050718)	1/26	0.26858	0.42714	0.313123	0.507423	-1.27297	1.67346	PYCARD
extrinsic apoptotic signaling pathway via death domain receptors (GO:0008625)	1/28	0.28598	0.441488	0.331989	0.519634	-1.33059	1.66568	TRADD
ERK1 and ERK2 cascade (GO:0070371)	1/22	0.232505	0.408301	0.273787	0.490586	-1.1332	1.65316	CTSH
viral budding via host ESCRT complex (GO:0039702)	1/21	0.223213	0.403617	0.263607	0.487797	-1.09471	1.64166	CHMP2B
positive regulation of leukocyte mediated cytotoxicity (GO:0001912)	1/26	0.26858	0.42714	0.313123	0.507423	-1.24804	1.64068	NECTIN2
lamellipodium assembly (GO:0030032)	1/24	0.250759	0.415483	0.293727	0.496547	-1.18419	1.63805	RAC1
dendritic spine organization (GO:0097061)	1/25	0.259723	0.422383	0.303492	0.504441	-1.21293	1.6352	MTMR2
regulation of stress fiber assembly (GO:0051492)	2/61	0.165195	0.372217	0.215947	0.463833	-0.904669	1.62897	PXN;RAC1
MAPK cascade (GO:0000165)	6/279	0.118582	0.351556	0.201805	0.462648	-0.764004	1.62897	PSME4;CTSH;PEBP1;LAMTOR2;CCR5;MAPK3
regulation of centrosome duplication (GO:0010824)	1/26	0.26858	0.42714	0.313123	0.507423	-1.238	1.62749	CHMP2B
calcium ion transport (GO:0006816)	3/119	0.17057	0.374687	0.237582	0.471358	-0.912685	1.61418	CCR1;CCR5;SLC8A1
regulation of acute inflammatory response (GO:0002673)	3/122	0.179428	0.379399	0.248629	0.478765	-0.939072	1.61331	C1QA;CLU;C1QC
regulation of cell division (GO:0051302)	2/66	0.186556	0.381135	0.241429	0.471358	-0.960569	1.61282	TXNIP;GIT1
regulation of T cell migration (GO:2000404)	1/18	0.194658	0.381135	0.23221	0.463833	-0.983526	1.60955	PYCARD
cellular response to catecholamine stimulus (GO:0071870)	1/24	0.250759	0.415483	0.293727	0.496547	-1.16248	1.60802	MAPK3
negative regulation of intrinsic apoptotic signaling pathway (GO:2001243)	2/63	0.173689	0.374687	0.226115	0.463833	-0.918496	1.60782	CLU;CCAR2
glycogen biosynthetic process (GO:0005978)	1/19	0.20429	0.388005	0.242821	0.471358	-1.01136	1.60626	PGM2L1
positive regulation of neutrophil chemotaxis (GO:0090023)	1/25	0.259723	0.422383	0.303492	0.504441	-1.18227	1.59387	RAC1
regulation of histone acetylation (GO:0035065)	1/27	0.277332	0.435808	0.322621	0.5136	-1.24226	1.59325	MAPK3
type I interferon signaling pathway (GO:0060337)	2/66	0.186556	0.381135	0.241429	0.471358	-0.948745	1.59296	RNASEL;IRF8
modulation of excitatory postsynaptic potential (GO:0098815)	1/26	0.26858	0.42714	0.313123	0.507423	-1.20991	1.59055	MTMR2
positive regulation of Rho protein signal transduction (GO:0035025)	1/26	0.26858	0.42714	0.313123	0.507423	-1.20769	1.58764	RAC1
regulation of angiogenesis (GO:0045765)	4/178	0.16474	0.372217	0.243591	0.472273	-0.86955	1.56814	RRAS;ANXA3;CTSH;SARS
lamellipodium organization (GO:0097581)	1/26	0.26858	0.42714	0.313123	0.507423	-1.18988	1.56423	RAC1
negative regulation of sequestering of calcium ion (GO:0051283)	1/25	0.259723	0.422383	0.303492	0.504441	-1.15822	1.56144	ITPR3
positive regulation of granulocyte chemotaxis (GO:0071624)	1/27	0.277332	0.435808	0.322621	0.5136	-1.217	1.56085	RAC1
regulation of protein ubiquitination involved in ubiquitin-dependent protein catabolic process (GO:2000058)	1/26	0.26858	0.42714	0.313123	0.507423	-1.18157	1.5533	CLU
negative regulation of peptidase activity (GO:0010466)	2/63	0.173689	0.374687	0.226115	0.463833	-0.887269	1.55316	UBXN1;SERPINB8
regulation of cardiac muscle contraction by regulation of the release of sequestered calcium ion (GO:0010881)	1/18	0.194658	0.381135	0.23221	0.463833	-0.942393	1.54224	SLC8A1
regulation of extrinsic apoptotic signaling pathway (GO:2001236)	2/60	0.160976	0.372217	0.210879	0.462648	-0.84024	1.5347	PYCARD;TRADD
positive regulation of protein kinase activity (GO:0045860)	4/173	0.153412	0.368536	0.228756	0.463833	-0.818047	1.53354	CSF1R;RAP1A;UNC119;CLU
regulation of protein oligomerization (GO:0032459)	1/24	0.250759	0.415483	0.293727	0.496547	-1.10845	1.53328	APOE
organophosphate ester transport (GO:0015748)	1/26	0.26858	0.42714	0.313123	0.507423	-1.16535	1.53197	SCP2
cellular response to nerve growth factor stimulus (GO:1990090)	1/23	0.241687	0.411647	0.283826	0.494045	-1.07845	1.53152	RAP1A
synaptic transmission, cholinergic (GO:0007271)	1/29	0.294524	0.447722	0.341227	0.526294	-1.24012	1.51591	APOE
glycolytic process (GO:0006096)	1/24	0.250759	0.415483	0.293727	0.496547	-1.09283	1.51167	PGAM1
positive regulation of leukocyte cell-cell adhesion (GO:1903039)	1/22	0.232505	0.408301	0.273787	0.490586	-1.03584	1.51113	PYCARD
regulation of supramolecular fiber organization (GO:1902903)	1/27	0.277332	0.435808	0.322621	0.5136	-1.17135	1.5023	APOE
regulation of lipid biosynthetic process (GO:0046890)	1/29	0.294524	0.447722	0.341227	0.526294	-1.22679	1.49962	APOE
negative regulation of cell-matrix adhesion (GO:0001953)	1/28	0.28598	0.441488	0.331989	0.519634	-1.19502	1.49596	CASK
serine family amino acid metabolic process (GO:0009069)	1/18	0.194658	0.381135	0.23221	0.463833	-0.911356	1.49144	SARS
substrate adhesion-dependent cell spreading (GO:0034446)	1/33	0.327696	0.472312	0.376927	0.548762	-1.33417	1.4885	RAC1
inorganic cation import across plasma membrane (GO:0098659)	1/26	0.26858	0.42714	0.313123	0.507423	-1.12924	1.48451	SLC8A1
negative regulation of epithelial cell proliferation (GO:0050680)	2/67	0.190875	0.381135	0.246545	0.476834	-0.896121	1.4841	CASK;APOE
positive regulation of adherens junction organization (GO:1903393)	1/20	0.213808	0.395183	0.253286	0.478765	-0.955364	1.47382	RAC1
positive regulation of protein oligomerization (GO:0032461)	1/24	0.250759	0.415483	0.293727	0.496547	-1.06511	1.47333	CLU
regulation of actin filament bundle assembly (GO:0032231)	1/25	0.259723	0.422383	0.303492	0.504441	-1.09093	1.47073	RAC1
regulation of bone resorption (GO:0045124)	1/23	0.241687	0.411647	0.283826	0.494045	-1.03528	1.47021	CSF1R
regulation of cell size (GO:0008361)	1/24	0.250759	0.415483	0.293727	0.496547	-1.06207	1.46913	RAC1
striated muscle contraction (GO:0006941)	2/62	0.169432	0.374687	0.221026	0.463833	-0.824955	1.46454	GAA;SLC8A1
superoxide metabolic process (GO:0006801)	1/30	0.302967	0.454451	0.350339	0.532569	-1.22504	1.46286	NCF1
release of sequestered calcium ion into cytosol (GO:0051209)	1/28	0.28598	0.441488	0.331989	0.519634	-1.15908	1.45098	ITPR3
apoptotic cell clearance (GO:0043277)	1/27	0.277332	0.435808	0.322621	0.5136	-1.13003	1.44931	RAC1
NAD biosynthetic process (GO:0009435)	1/23	0.241687	0.411647	0.283826	0.494045	-1.01986	1.44832	NAXE
homophilic cell adhesion via plasma membrane adhesion molecules (GO:0007156)	2/65	0.182252	0.379399	0.236317	0.471358	-0.849991	1.447	PLXNB2;NECTIN2
regulation of protein localization to nucleus (GO:1900180)	1/28	0.28598	0.441488	0.331989	0.519634	-1.15123	1.44114	CARD10
lipid catabolic process (GO:0016042)	1/22	0.232505	0.408301	0.273787	0.490586	-0.983953	1.43543	PPT1
cholesterol efflux (GO:0033344)	1/24	0.250759	0.415483	0.293727	0.496547	-1.036	1.43307	APOE
positive regulation of lipid metabolic process (GO:0045834)	1/22	0.232505	0.408301	0.273787	0.490586	-0.981714	1.43217	APOE
triglyceride homeostasis (GO:0070328)	1/29	0.294524	0.447722	0.341227	0.526294	-1.1567	1.41394	APOE
antigen processing and presentation of peptide antigen via MHC class I (GO:0002474)	1/29	0.294524	0.447722	0.341227	0.526294	-1.15582	1.41287	IFI30
cholesterol metabolic process (GO:0008203)	2/69	0.199553	0.387367	0.256788	0.484229	-0.876546	1.41271	ACLY;APOE
regulation of neutrophil chemotaxis (GO:0090022)	1/30	0.302967	0.454451	0.350339	0.532569	-1.17723	1.40576	RAC1
positive regulation of protein modification process (GO:0031401)	4/164	0.133818	0.353572	0.202688	0.462648	-0.697191	1.40224	CSF1R;GBA;RAC1;MAPK3
positive regulation of interleukin-1 secretion (GO:0050716)	1/30	0.302967	0.454451	0.350339	0.532569	-1.16771	1.3944	PYCARD
positive regulation of dephosphorylation (GO:0035306)	1/25	0.259723	0.422383	0.303492	0.504441	-1.03375	1.39364	GBA
lysosome localization (GO:0032418)	1/30	0.302967	0.454451	0.350339	0.532569	-1.16597	1.39232	PIK3CD
negative regulation of lymphocyte proliferation (GO:0050672)	1/30	0.302967	0.454451	0.350339	0.532569	-1.16595	1.39229	CD300A
positive regulation of cell junction assembly (GO:1901890)	1/24	0.250759	0.415483	0.293727	0.496547	-1.0026	1.38686	RAC1
positive regulation of phospholipid metabolic process (GO:1903727)	1/29	0.294524	0.447722	0.341227	0.526294	-1.12191	1.37141	STOML2
negative regulation of peptidyl-tyrosine phosphorylation (GO:0050732)	1/28	0.28598	0.441488	0.331989	0.519634	-1.09198	1.36698	CD300A
negative regulation of myeloid leukocyte differentiation (GO:0002762)	1/28	0.28598	0.441488	0.331989	0.519634	-1.08912	1.36339	C1QC
positive regulation of endothelial cell migration (GO:0010595)	2/71	0.208276	0.393686	0.267038	0.490586	-0.868795	1.36305	ANXA3;TMSB4X
negative regulation of T cell activation (GO:0050868)	1/35	0.343695	0.482208	0.394049	0.557297	-1.26767	1.35387	TNFAIP8L2
regulation of monocyte chemotaxis (GO:0090025)	1/23	0.241687	0.411647	0.283826	0.494045	-0.947388	1.3454	CCR1
ATP generation from ADP (GO:0006757)	1/25	0.259723	0.422383	0.303492	0.504441	-0.989014	1.33333	PGAM1
sphingolipid biosynthetic process (GO:0030148)	2/67	0.190875	0.381135	0.246545	0.476834	-0.804815	1.33288	ALDH3B1;GBA
regulation of p38MAPK cascade (GO:1900744)	1/27	0.277332	0.435808	0.322621	0.5136	-1.03399	1.32613	NCF1
positive regulation of histone modification (GO:0031058)	1/30	0.302967	0.454451	0.350339	0.532569	-1.10901	1.3243	MAPK3
prostaglandin metabolic process (GO:0006693)	1/26	0.26858	0.42714	0.313123	0.507423	-1.00731	1.32422	FAM213B
positive regulation of MAPK cascade (GO:0043410)	6/290	0.135181	0.355102	0.225828	0.463833	-0.659761	1.32027	CCR1;PYCARD;CSF1R;RAP1A;CARD9;MAPK3
cellular response to ketone (GO:1901655)	1/29	0.294524	0.447722	0.341227	0.526294	-1.07235	1.31083	PCK2
interferon-gamma-mediated signaling pathway (GO:0060333)	2/71	0.208276	0.393686	0.267038	0.490586	-0.834621	1.30943	IRF8;IFI30
mitochondrial calcium ion transmembrane transport (GO:0006851)	1/22	0.232505	0.408301	0.273787	0.490586	-0.89407	1.30431	STOML2
regulation of centrosome cycle (GO:0046605)	1/27	0.277332	0.435808	0.322621	0.5136	-1.01214	1.2981	CHMP2B
cyclic-nucleotide-mediated signaling (GO:0019935)	1/33	0.327696	0.472312	0.376927	0.548762	-1.16339	1.29795	APOE
negative regulation of synaptic transmission (GO:0050805)	1/28	0.28598	0.441488	0.331989	0.519634	-1.03329	1.29351	MTMR2
cellular response to type I interferon (GO:0071357)	2/66	0.186556	0.381135	0.241429	0.471358	-0.768648	1.29058	RNASEL;IRF8
retinoid metabolic process (GO:0001523)	2/76	0.230239	0.408301	0.292645	0.496547	-0.878422	1.29008	SCPEP1;APOE
positive regulation of ion transmembrane transporter activity (GO:0032414)	1/24	0.250759	0.415483	0.293727	0.496547	-0.926333	1.28136	TMSB4X
NAD metabolic process (GO:0019674)	1/24	0.250759	0.415483	0.293727	0.496547	-0.922999	1.27675	NAXE
negative regulation of JNK cascade (GO:0046329)	1/29	0.294524	0.447722	0.341227	0.526294	-1.04352	1.27559	PDCD4
negative regulation of catalytic activity (GO:0043086)	1/27	0.277332	0.435808	0.322621	0.5136	-0.991805	1.27203	CCAR2
viral budding (GO:0046755)	1/24	0.250759	0.415483	0.293727	0.496547	-0.917575	1.26925	CHMP2B
positive regulation of phosphatase activity (GO:0010922)	1/23	0.241687	0.411647	0.283826	0.494045	-0.892418	1.26733	CD300A
negative regulation of interleukin-6 production (GO:0032715)	1/25	0.259723	0.422383	0.303492	0.504441	-0.937411	1.26376	GBA
regulation of actin filament polymerization (GO:0030833)	2/69	0.199553	0.387367	0.256788	0.484229	-0.782394	1.26097	PYCARD;RAC1
phosphate-containing compound metabolic process (GO:0006796)	4/184	0.178716	0.379399	0.261668	0.487797	-0.728904	1.25514	PLA2G15;MINPP1;PIK3CD;MAPK3
plasma membrane bounded cell projection organization (GO:0120036)	3/119	0.17057	0.374687	0.237582	0.471358	-0.702938	1.24322	CSF1R;RAC1;CORO1B
multivesicular body assembly (GO:0036258)	1/31	0.311309	0.461717	0.359325	0.537968	-1.06238	1.23976	CHMP2B
response to insulin (GO:0032868)	2/72	0.212652	0.395183	0.272164	0.490586	-0.800336	1.239	MARS;PCK2
positive regulation of interleukin-1 beta production (GO:0032731)	1/32	0.319552	0.467378	0.368187	0.542796	-1.08597	1.23891	PYCARD
positive regulation of telomere maintenance via telomerase (GO:0032212)	1/33	0.327696	0.472312	0.376927	0.548762	-1.10251	1.23003	MAPK3
regulation of neuron projection development (GO:0010975)	3/120	0.173508	0.374687	0.241255	0.471358	-0.702048	1.22966	RAP1A;PLXNB2;APOE
neural tube closure (GO:0001843)	1/34	0.335743	0.476539	0.385547	0.552176	-1.12642	1.22938	PLXNB2
calcium-mediated signaling (GO:0019722)	2/71	0.208276	0.393686	0.267038	0.490586	-0.781421	1.22597	CCR5;SLC8A1
positive regulation of NF-kappaB transcription factor activity (GO:0051092)	3/129	0.200556	0.388005	0.274684	0.491083	-0.762559	1.22517	PYCARD;TRADD;CLU
positive regulation of monooxygenase activity (GO:0032770)	1/24	0.250759	0.415483	0.293727	0.496547	-0.885106	1.22433	APOE
negative regulation of endothelial cell proliferation (GO:0001937)	1/31	0.311309	0.461717	0.359325	0.537968	-1.04635	1.22105	APOE
positive regulation of extrinsic apoptotic signaling pathway (GO:2001238)	1/29	0.294524	0.447722	0.341227	0.526294	-0.996718	1.21838	PYCARD
vesicle organization (GO:0016050)	3/128	0.197501	0.384799	0.270942	0.490586	-0.74921	1.21523	USP8;CHMP2B;SNX6
positive regulation of Notch signaling pathway (GO:0045747)	1/34	0.335743	0.476539	0.385547	0.552176	-1.11203	1.21368	AAK1
negative regulation of smooth muscle cell proliferation (GO:0048662)	1/28	0.28598	0.441488	0.331989	0.519634	-0.968586	1.21251	PDCD4
regulation of peptide hormone secretion (GO:0090276)	2/74	0.221431	0.403617	0.28241	0.494045	-0.804151	1.21237	RAP1A;ITPR3
secondary alcohol metabolic process (GO:1902652)	1/32	0.319552	0.467378	0.368187	0.542796	-1.05698	1.20584	APOE
positive regulation of cell motility (GO:2000147)	4/180	0.169354	0.374687	0.249585	0.478765	-0.677952	1.20388	CCR1;CSF1R;CTSH;PIK3CD
protein homooligomerization (GO:0051260)	4/191	0.195504	0.382318	0.283071	0.494045	-0.737424	1.20361	PEX11B;LONP1;ACOT13;ITPR3
regulation of mitochondrial membrane potential (GO:0051881)	1/36	0.351551	0.488043	0.402433	0.563476	-1.15108	1.20334	STOML2
negative regulation of receptor activity (GO:2000272)	1/33	0.327696	0.472312	0.376927	0.548762	-1.0706	1.19444	SNX6
regulation of monooxygenase activity (GO:0032768)	1/24	0.250759	0.415483	0.293727	0.496547	-0.860372	1.19012	DNM2
multivesicular body organization (GO:0036257)	1/32	0.319552	0.467378	0.368187	0.542796	-1.03948	1.18588	CHMP2B
cardiac muscle cell development (GO:0055013)	1/28	0.28598	0.441488	0.331989	0.519634	-0.946294	1.1846	SLC8A1
tube closure (GO:0060606)	1/30	0.302967	0.454451	0.350339	0.532569	-0.989845	1.182	PLXNB2
regulation of cellular protein localization (GO:1903827)	1/26	0.26858	0.42714	0.313123	0.507423	-0.89665	1.17874	RAB11FIP5
divalent inorganic cation homeostasis (GO:0072507)	1/24	0.250759	0.415483	0.293727	0.496547	-0.851717	1.17815	SLC8A1
negative regulation of endothelial cell migration (GO:0010596)	1/35	0.343695	0.482208	0.394049	0.557297	-1.10272	1.17771	APOE
positive regulation of nitric oxide metabolic process (GO:1904407)	1/26	0.26858	0.42714	0.313123	0.507423	-0.895498	1.17723	CLU
regulation of spindle assembly (GO:0090169)	1/26	0.26858	0.42714	0.313123	0.507423	-0.888413	1.16791	CHMP2B
positive regulation of catalytic activity (GO:0043085)	1/34	0.335743	0.476539	0.385547	0.552176	-1.06668	1.16418	MAPK3
sodium ion homeostasis (GO:0055078)	1/27	0.277332	0.435808	0.322621	0.5136	-0.907605	1.16404	SLC8A1
positive regulation of RNA splicing (GO:0033120)	1/23	0.241687	0.411647	0.283826	0.494045	-0.818901	1.16293	PRDX6
negative regulation of extrinsic apoptotic signaling pathway via death domain receptors (GO:1902042)	1/32	0.319552	0.467378	0.368187	0.542796	-1.01853	1.16198	TRADD
transcription initiation from RNA polymerase I promoter (GO:0006361)	1/34	0.335743	0.476539	0.385547	0.552176	-1.06283	1.15998	MAPK3
regulation of protein processing (GO:0070613)	3/129	0.200556	0.388005	0.274684	0.491083	-0.720247	1.15719	C1QA;CLU;C1QC
regulation of dendritic spine development (GO:0060998)	1/32	0.319552	0.467378	0.368187	0.542796	-1.00365	1.145	APOE
regulation of receptor internalization (GO:0002090)	1/29	0.294524	0.447722	0.341227	0.526294	-0.934096	1.14183	MTMR2
positive regulation of viral genome replication (GO:0045070)	1/32	0.319552	0.467378	0.368187	0.542796	-0.997667	1.13817	YTHDC2
lipid biosynthetic process (GO:0008610)	2/73	0.217038	0.400218	0.277288	0.494045	-0.742224	1.13388	ACLY;SCP2
transcription from RNA polymerase I promoter (GO:0006360)	1/34	0.335743	0.476539	0.385547	0.552176	-1.03871	1.13365	MAPK3
hemopoiesis (GO:0030097)	2/77	0.234651	0.410563	0.297755	0.502284	-0.777113	1.12655	CSF1R;RRAS
cell-cell junction organization (GO:0045216)	2/73	0.217038	0.400218	0.277288	0.494045	-0.736946	1.12582	CSF1R;NECTIN2
regulation of G-protein coupled receptor protein signaling pathway (GO:0008277)	2/75	0.225832	0.407423	0.28753	0.496547	-0.754885	1.12324	GIT2;GIT1
oxoacid metabolic process (GO:0043436)	1/33	0.327696	0.472312	0.376927	0.548762	-1.00622	1.12261	MINPP1
positive regulation of nitric oxide biosynthetic process (GO:0045429)	1/26	0.26858	0.42714	0.313123	0.507423	-0.852966	1.12131	CLU
positive regulation of TOR signaling (GO:0032008)	1/33	0.327696	0.472312	0.376927	0.548762	-1.00348	1.11955	LAMTOR2
regulation of wound healing (GO:0061041)	1/35	0.343695	0.482208	0.394049	0.557297	-1.04717	1.11838	CASK
fat-soluble vitamin metabolic process (GO:0006775)	1/27	0.277332	0.435808	0.322621	0.5136	-0.871594	1.11785	LGMN
regulation of cell-substrate adhesion (GO:0010810)	1/34	0.335743	0.476539	0.385547	0.552176	-1.02381	1.11739	RAC1
non-canonical Wnt signaling pathway (GO:0035567)	3/128	0.197501	0.384799	0.270942	0.490586	-0.688159	1.1162	PSME4;AP2A1;RAC1
regulation of cell communication (GO:0010646)	2/72	0.212652	0.395183	0.272164	0.490586	-0.720853	1.11595	MTCH1;SLC8A1
cardiac muscle cell action potential (GO:0086001)	1/30	0.302967	0.454451	0.350339	0.532569	-0.931805	1.1127	SLC8A1
regulation of protein localization to cell surface (GO:2000008)	1/28	0.28598	0.441488	0.331989	0.519634	-0.887843	1.11143	RAB11FIP5
positive regulation of substrate adhesion-dependent cell spreading (GO:1900026)	1/28	0.28598	0.441488	0.331989	0.519634	-0.879281	1.10071	RAC1
alpha-amino acid metabolic process (GO:1901605)	1/32	0.319552	0.467378	0.368187	0.542796	-0.96273	1.09832	ALDH6A1
regulation of cell migration involved in sprouting angiogenesis (GO:0090049)	1/31	0.311309	0.461717	0.359325	0.537968	-0.939359	1.0962	CARD10
cellular response to glucose starvation (GO:0042149)	1/34	0.335743	0.476539	0.385547	0.552176	-1.00269	1.09434	MTMR3
negative regulation of response to stimulus (GO:0048585)	3/128	0.197501	0.384799	0.270942	0.490586	-0.670489	1.08754	CSF1R;CASK;CLU
positive regulation of cytokinesis (GO:0032467)	1/35	0.343695	0.482208	0.394049	0.557297	-1.01441	1.08339	SVIL
positive regulation of telomere maintenance via telomere lengthening (GO:1904358)	1/35	0.343695	0.482208	0.394049	0.557297	-1.01405	1.08301	MAPK3
regulation of defense response (GO:0031347)	2/76	0.230239	0.408301	0.292645	0.496547	-0.735525	1.08022	TMSB4X;APOE
cytoskeleton-dependent cytokinesis (GO:0061640)	2/71	0.208276	0.393686	0.267038	0.490586	-0.682648	1.071	USP8;UNC119
regulation of release of sequestered calcium ion into cytosol by sarcoplasmic reticulum (GO:0010880)	1/24	0.250759	0.415483	0.293727	0.496547	-0.772705	1.06885	SLC8A1
positive regulation of epithelial cell migration (GO:0010634)	2/75	0.225832	0.407423	0.28753	0.496547	-0.715055	1.06398	ANXA3;CTSH
antigen processing and presentation of exogenous peptide antigen via MHC class I, TAP-dependent (GO:0002479)	2/76	0.230239	0.408301	0.292645	0.496547	-0.720997	1.05888	NCF1;PSME4
regulation of actin cytoskeleton reorganization (GO:2000249)	1/31	0.311309	0.461717	0.359325	0.537968	-0.903689	1.05458	CSF1R
response to interleukin-1 (GO:0070555)	2/77	0.234651	0.410563	0.297755	0.502284	-0.726459	1.05311	PYCARD;YTHDC2
positive regulation of cytokine secretion (GO:0050715)	2/74	0.221431	0.403617	0.28241	0.494045	-0.696191	1.04961	PYCARD;CSF1R
cellular response to growth factor stimulus (GO:0071363)	3/140	0.234829	0.410563	0.316112	0.510941	-0.722528	1.04687	RAP1A;MARS;CORO1B
exonucleolytic nuclear-transcribed mRNA catabolic process involved in deadenylation-dependent decay (GO:0043928)	1/34	0.335743	0.476539	0.385547	0.552176	-0.953353	1.0405	NT5C3B
peptidyl-tyrosine phosphorylation (GO:0018108)	2/80	0.247916	0.415483	0.31305	0.507423	-0.741851	1.03463	CSF1R;MAPK3
regulation of blood vessel diameter (GO:0097746)	1/28	0.28598	0.441488	0.331989	0.519634	-0.825453	1.03333	SCPEP1
regulation of cellular response to heat (GO:1900034)	2/79	0.243491	0.413854	0.307959	0.507423	-0.727765	1.0281	CCAR2;MAPK3
negative regulation of mitochondrion organization (GO:0010823)	1/34	0.335743	0.476539	0.385547	0.552176	-0.941527	1.02759	CLU
acylglycerol metabolic process (GO:0006639)	1/37	0.359314	0.492348	0.410702	0.566683	-0.999677	1.02323	APOE
regulation of JUN kinase activity (GO:0043506)	1/35	0.343695	0.482208	0.394049	0.557297	-0.951266	1.01595	PDCD4
regulation of ubiquitin-protein transferase activity (GO:0051438)	1/32	0.319552	0.467378	0.368187	0.542796	-0.890232	1.01561	DCUN1D1
regulation of vascular endothelial growth factor production (GO:0010574)	1/28	0.28598	0.441488	0.331989	0.519634	-0.808939	1.01266	SARS
primary neural tube formation (GO:0014020)	1/29	0.294524	0.447722	0.341227	0.526294	-0.820604	1.0031	PLXNB2
cellular response to amino acid stimulus (GO:0071230)	1/33	0.327696	0.472312	0.376927	0.548762	-0.893341	0.996673	LAMTOR2
negative regulation of toll-like receptor signaling pathway (GO:0034122)	1/32	0.319552	0.467378	0.368187	0.542796	-0.861175	0.982459	CD300A
epithelial cell migration (GO:0010631)	1/37	0.359314	0.492348	0.410702	0.566683	-0.95924	0.981837	PXN
positive regulation of biomineral tissue development (GO:0070169)	1/34	0.335743	0.476539	0.385547	0.552176	-0.898032	0.980119	SLC8A1
cellular response to cAMP (GO:0071320)	1/31	0.311309	0.461717	0.359325	0.537968	-0.837485	0.977319	RAP1A
regulation of cholesterol biosynthetic process (GO:0045540)	1/41	0.389451	0.513221	0.442654	0.5917	-1.03571	0.976687	APOE
positive regulation of cell-matrix adhesion (GO:0001954)	1/34	0.335743	0.476539	0.385547	0.552176	-0.893187	0.974831	RAC1
positive regulation of transferase activity (GO:0051347)	3/138	0.228516	0.408301	0.308556	0.507423	-0.657752	0.97094	CSF1R;DCUN1D1;MAPK3
zymogen activation (GO:0031638)	1/37	0.359314	0.492348	0.410702	0.566683	-0.944505	0.966755	CTSH
epithelial tube morphogenesis (GO:0060562)	1/35	0.343695	0.482208	0.394049	0.557297	-0.902664	0.964046	CSF1R
positive regulation of lipid biosynthetic process (GO:0046889)	1/29	0.294524	0.447722	0.341227	0.526294	-0.782802	0.956892	APOE
protein complex assembly (GO:0006461)	4/190	0.193076	0.381135	0.279996	0.494045	-0.579984	0.953884	STOML2;NCF1;TRADD;TRAPPC11
calcium ion import (GO:0070509)	1/29	0.294524	0.447722	0.341227	0.526294	-0.77625	0.948883	SLC8A1
entry into host cell (GO:0030260)	1/34	0.335743	0.476539	0.385547	0.552176	-0.861796	0.940571	CCR5
ferric iron transport (GO:0015682)	1/37	0.359314	0.492348	0.410702	0.566683	-0.913878	0.935407	DNM2
striated muscle tissue development (GO:0014706)	1/30	0.302967	0.454451	0.350339	0.532569	-0.780505	0.932026	SVIL
regulation of cytokinesis (GO:0032465)	2/78	0.239069	0.411647	0.30286	0.504441	-0.650782	0.931272	SVIL;GIT1
positive regulation of ubiquitin-protein transferase activity (GO:0051443)	1/32	0.319552	0.467378	0.368187	0.542796	-0.812906	0.927393	DCUN1D1
regulation of vesicle-mediated transport (GO:0060627)	3/139	0.231669	0.408301	0.312333	0.507423	-0.630203	0.921638	AAK1;UNC119;MAPK3
regulation of substrate adhesion-dependent cell spreading (GO:1900024)	1/42	0.396763	0.519828	0.450369	0.596475	-0.99626	0.92096	RAC1
regulation of phosphatidylinositol 3-kinase signaling (GO:0014066)	2/81	0.252343	0.416801	0.318134	0.512638	-0.668568	0.920594	NCF1;MAPK3
positive regulation of axonogenesis (GO:0050772)	1/38	0.366985	0.498545	0.418857	0.572944	-0.917672	0.919906	PLXNB2
regulation of osteoclast differentiation (GO:0045670)	1/38	0.366985	0.498545	0.418857	0.572944	-0.909091	0.911305	CCR1
positive regulation of protein ubiquitination (GO:0031398)	2/84	0.265636	0.42714	0.333328	0.521216	-0.686503	0.910048	DCUN1D1;CLU
calcium ion transmembrane import into cytosol (GO:0097553)	1/37	0.359314	0.492348	0.410702	0.566683	-0.884776	0.90562	ITPR3
divalent metal ion transport (GO:0070838)	2/89	0.287783	0.443432	0.358428	0.537968	-0.725243	0.903324	CCR1;CCR5
regulation of vascular smooth muscle cell proliferation (GO:1904705)	1/26	0.26858	0.42714	0.313123	0.507423	-0.685404	0.901036	PDCD4
natural killer cell activation (GO:0030101)	1/37	0.359314	0.492348	0.410702	0.566683	-0.871842	0.892381	PIK3CD
sodium ion transmembrane transport (GO:0035725)	1/37	0.359314	0.492348	0.410702	0.566683	-0.870587	0.891096	SLC8A1
regulation of protein serine/threonine kinase activity (GO:0071900)	2/81	0.252343	0.416801	0.318134	0.512638	-0.644372	0.887277	PYCARD;CSF1R
phosphatidylinositol 3-kinase signaling (GO:0014065)	1/31	0.311309	0.461717	0.359325	0.537968	-0.754248	0.880185	PIK3CD
mitochondrion disassembly (GO:0061726)	1/39	0.374564	0.504086	0.426899	0.580437	-0.892501	0.876431	WDR45B
response to amino acid (GO:0043200)	1/35	0.343695	0.482208	0.394049	0.557297	-0.820004	0.875766	LAMTOR2
membrane depolarization during action potential (GO:0086010)	1/39	0.374564	0.504086	0.426899	0.580437	-0.887236	0.87126	SLC8A1
calcium ion transmembrane transport (GO:0070588)	2/87	0.278929	0.437449	0.348426	0.532569	-0.682056	0.870848	STOML2;SLC8A1
activation of MAPKK activity (GO:0000186)	1/34	0.335743	0.476539	0.385547	0.552176	-0.787271	0.859234	RAP1A
positive regulation of reactive oxygen species biosynthetic process (GO:1903428)	1/31	0.311309	0.461717	0.359325	0.537968	-0.730869	0.852902	CLU
protein K63-linked deubiquitination (GO:0070536)	1/29	0.294524	0.447722	0.341227	0.526294	-0.694255	0.848653	USP8
regulation of primary metabolic process (GO:0080090)	3/140	0.234829	0.410563	0.316112	0.510941	-0.585539	0.848385	PSAP;PSME4;APOE
transmembrane receptor protein tyrosine kinase signaling pathway (GO:0007169)	7/397	0.19863	0.386524	0.324517	0.515582	-0.52456	0.847851	CSF1R;NCF1;PXN;AP2A1;RAC1;GIT1;MAPK3
phosphorylation (GO:0016310)	7/387	0.182317	0.379399	0.302415	0.504441	-0.492847	0.838829	RNASEL;STK38;AAK1;ADK;PIK3CD;UQCRC2;MAPK3
positive regulation of neuron death (GO:1901216)	1/39	0.374564	0.504086	0.426899	0.580437	-0.85416	0.83878	CLU
positive regulation of Wnt signaling pathway (GO:0030177)	3/141	0.237998	0.411647	0.319892	0.5136	-0.576413	0.827438	USP8;PSME4;CCAR2
negative regulation of blood coagulation (GO:0030195)	1/37	0.359314	0.492348	0.410702	0.566683	-0.80178	0.820668	APOE
positive regulation of dendrite development (GO:1900006)	1/33	0.327696	0.472312	0.376927	0.548762	-0.733311	0.818132	APOE
regulation of ATP metabolic process (GO:1903578)	1/44	0.411124	0.532043	0.465481	0.608854	-0.913664	0.812119	PGAM1
regulation of small GTPase mediated signal transduction (GO:0051056)	3/141	0.237998	0.411647	0.319892	0.5136	-0.564454	0.810271	ARAP3;RAC1;ARHGAP15
acylglycerol catabolic process (GO:0046464)	1/31	0.311309	0.461717	0.359325	0.537968	-0.693551	0.809353	APOE
positive regulation of protein ubiquitination involved in ubiquitin-dependent protein catabolic process (GO:2000060)	2/88	0.283357	0.441488	0.353434	0.536244	-0.637947	0.804481	PSME4;CLU
positive regulation of phagocytosis (GO:0050766)	1/40	0.382052	0.509458	0.434831	0.586689	-0.835034	0.803468	PYCARD
cellular response to cytokine stimulus (GO:0071345)	8/457	0.182403	0.379399	0.313295	0.507423	-0.472077	0.803256	CCR1;PYCARD;CSF1R;GBA;IRF8;PIK3CD;IL16;CCR5
positive regulation of protein localization to nucleus (GO:1900182)	1/43	0.403986	0.527883	0.457978	0.605035	-0.885748	0.802819	CARD10
positive regulation of telomere maintenance (GO:0032206)	1/33	0.327696	0.472312	0.376927	0.548762	-0.719402	0.802614	MAPK3
liver development (GO:0001889)	1/32	0.319552	0.467378	0.368187	0.542796	-0.703376	0.802437	PCK2
chondroitin sulfate metabolic process (GO:0030204)	1/31	0.311309	0.461717	0.359325	0.537968	-0.686788	0.801461	HEXA
regulation of B cell proliferation (GO:0030888)	1/44	0.411124	0.532043	0.465481	0.608854	-0.898789	0.798898	CD300A
negative regulation of cell projection organization (GO:0031345)	1/42	0.396763	0.519828	0.450369	0.596475	-0.854456	0.789874	APOE
positive regulation of receptor activity (GO:2000273)	1/38	0.366985	0.498545	0.418857	0.572944	-0.786062	0.787976	NCF1
regulation of blood coagulation (GO:0030193)	1/31	0.311309	0.461717	0.359325	0.537968	-0.671612	0.783751	APOE
positive regulation of cytoskeleton organization (GO:0051495)	2/78	0.239069	0.411647	0.30286	0.504441	-0.546006	0.781337	PYCARD;RAC1
negative regulation of cytokine secretion (GO:0050710)	1/41	0.389451	0.513221	0.442654	0.5917	-0.827824	0.780651	TMSB4X
vesicle-mediated transport in synapse (GO:0099003)	1/37	0.359314	0.492348	0.410702	0.566683	-0.760649	0.778568	DNM2
negative regulation of cell-substrate adhesion (GO:0010812)	1/36	0.351551	0.488043	0.402433	0.563476	-0.738589	0.77212	CASK
negative regulation of epidermal growth factor receptor signaling pathway (GO:0042059)	1/41	0.389451	0.513221	0.442654	0.5917	-0.813238	0.766896	SNX6
regulation of fibroblast proliferation (GO:0048145)	1/47	0.432031	0.544854	0.487378	0.622085	-0.906459	0.760754	CD300A
skeletal muscle organ development (GO:0060538)	1/30	0.302967	0.454451	0.350339	0.532569	-0.636761	0.760376	SVIL
BMP signaling pathway (GO:0030509)	2/82	0.256773	0.422383	0.323208	0.514018	-0.558972	0.759957	PDCD4;MAPK3
nuclear-transcribed mRNA catabolic process, exonucleolytic (GO:0000291)	1/36	0.351551	0.488043	0.402433	0.563476	-0.725853	0.758806	NT5C3B
cell-matrix adhesion (GO:0007160)	2/91	0.296625	0.450052	0.368375	0.542796	-0.621776	0.755636	RAC1;SIGLEC1
positive regulation of Ras protein signal transduction (GO:0046579)	1/41	0.389451	0.513221	0.442654	0.5917	-0.793217	0.748016	RAC1
positive regulation of interleukin-6 production (GO:0032755)	1/44	0.411124	0.532043	0.465481	0.608854	-0.841499	0.747975	PYCARD
negative regulation of NF-kappaB transcription factor activity (GO:0032088)	2/83	0.261204	0.424357	0.328273	0.519634	-0.556714	0.747362	PYCARD;TMSB4X
positive regulation of sequence-specific DNA binding transcription factor activity (GO:0051091)	4/216	0.25885	0.422383	0.361046	0.540035	-0.552137	0.746217	PYCARD;ANXA3;TRADD;CLU
response to cAMP (GO:0051591)	1/41	0.389451	0.513221	0.442654	0.5917	-0.791287	0.746196	RAP1A
positive regulation of epidermal growth factor receptor signaling pathway (GO:0045742)	1/30	0.302967	0.454451	0.350339	0.532569	-0.624883	0.746193	NCF1
protein destabilization (GO:0031648)	1/32	0.319552	0.467378	0.368187	0.542796	-0.653708	0.745774	CTSH
positive regulation of calcium ion transport (GO:0051928)	1/34	0.335743	0.476539	0.385547	0.552176	-0.677201	0.739103	CCR1
regulation of endothelial cell apoptotic process (GO:2000351)	1/36	0.351551	0.488043	0.402433	0.563476	-0.704452	0.736434	PDCD4
skeletal muscle tissue development (GO:0007519)	1/40	0.382052	0.509458	0.434831	0.586689	-0.765062	0.736141	SVIL
cellular response to hormone stimulus (GO:0032870)	2/81	0.252343	0.416801	0.318134	0.512638	-0.53282	0.733674	CTSH;CTSB
positive regulation of cellular metabolic process (GO:0031325)	2/93	0.305451	0.457743	0.378261	0.550197	-0.617023	0.731769	ACLY;APOE
regulation of double-strand break repair (GO:2000779)	1/35	0.343695	0.482208	0.394049	0.557297	-0.684409	0.73095	OTUB1
regulation of cholesterol metabolic process (GO:0090181)	1/42	0.396763	0.519828	0.450369	0.596475	-0.790036	0.730323	APOE
organic hydroxy compound transport (GO:0015850)	1/37	0.359314	0.492348	0.410702	0.566683	-0.711844	0.728613	OSBP
regulation of interferon-beta production (GO:0032648)	1/35	0.343695	0.482208	0.394049	0.557297	-0.680889	0.727191	PYCARD
positive regulation of transport (GO:0051050)	1/45	0.418177	0.535483	0.472882	0.612465	-0.833445	0.72664	APOE
positive regulation of blood vessel endothelial cell migration (GO:0043536)	1/46	0.425145	0.539789	0.48018	0.617375	-0.845896	0.723516	TMSB4X
regulation of activated T cell proliferation (GO:0046006)	1/30	0.302967	0.454451	0.350339	0.532569	-0.60276	0.719774	PYCARD
mitochondrial translational termination (GO:0070126)	2/90	0.292206	0.447722	0.363409	0.542796	-0.581861	0.715861	GFM2;MRRF
T cell differentiation (GO:0030217)	1/39	0.374564	0.504086	0.426899	0.580437	-0.725521	0.712457	PIK3CD
negative regulation of type I interferon production (GO:0032480)	1/45	0.418177	0.535483	0.472882	0.612465	-0.816219	0.711621	PYCARD
ceramide biosynthetic process (GO:0046513)	1/33	0.327696	0.472312	0.376927	0.548762	-0.637842	0.71162	GBA
positive regulation of myeloid leukocyte differentiation (GO:0002763)	1/33	0.327696	0.472312	0.376927	0.548762	-0.633967	0.707298	CCR1
translational termination (GO:0006415)	2/97	0.323036	0.472038	0.397836	0.562152	-0.614935	0.69487	GFM2;MRRF
transmembrane receptor protein serine/threonine kinase signaling pathway (GO:0007178)	3/145	0.250742	0.415483	0.335014	0.523335	-0.494076	0.683471	PXN;PDCD4;MAPK3
myelination (GO:0042552)	1/38	0.366985	0.498545	0.418857	0.572944	-0.680622	0.682279	FAM126A
intracellular protein transport (GO:0006886)	6/348	0.238072	0.411647	0.363633	0.542796	-0.473071	0.678944	CTSA;GGA1;RAB24;AP2A1;ARFGAP3;SNX6
spermatid development (GO:0007286)	1/37	0.359314	0.492348	0.410702	0.566683	-0.662796	0.67841	NECTIN2
signal transduction by p53 class mediator (GO:0072331)	1/40	0.382052	0.509458	0.434831	0.586689	-0.703409	0.676819	PYCARD
regulation of interleukin-1 beta secretion (GO:0050706)	1/35	0.343695	0.482208	0.394049	0.557297	-0.632834	0.675867	PYCARD
regulation of phagocytosis (GO:0050764)	1/42	0.396763	0.519828	0.450369	0.596475	-0.722042	0.667468	PYCARD
transferrin transport (GO:0033572)	1/37	0.359314	0.492348	0.410702	0.566683	-0.65101	0.666346	DNM2
regulation of generation of precursor metabolites and energy (GO:0043467)	1/47	0.432031	0.544854	0.487378	0.622085	-0.791609	0.664365	PGAM1
regulation of plasma membrane bounded cell projection assembly (GO:0120032)	1/40	0.382052	0.509458	0.434831	0.586689	-0.690409	0.66431	RAC1
nuclear envelope organization (GO:0006998)	1/31	0.311309	0.461717	0.359325	0.537968	-0.568524	0.66345	DCTN1
intrinsic apoptotic signaling pathway in response to DNA damage (GO:0008630)	1/49	0.445556	0.552751	0.501478	0.631752	-0.816377	0.659986	PYCARD
regulation of carbohydrate catabolic process (GO:0043470)	1/38	0.366985	0.498545	0.418857	0.572944	-0.657744	0.659345	PGAM1
positive regulation of bone mineralization (GO:0030501)	1/32	0.319552	0.467378	0.368187	0.542796	-0.577412	0.658732	SLC8A1
regulation of canonical Wnt signaling pathway (GO:0060828)	4/214	0.253626	0.418482	0.354772	0.537759	-0.480009	0.658523	USP8;PSME4;APOE;CCAR2
regulation of nitric oxide biosynthetic process (GO:0045428)	1/33	0.327696	0.472312	0.376927	0.548762	-0.587675	0.65565	CLU
amide biosynthetic process (GO:0043604)	1/45	0.418177	0.535483	0.472882	0.612465	-0.750859	0.654638	GBA
cellular response to BMP stimulus (GO:0071773)	2/88	0.283357	0.441488	0.353434	0.536244	-0.513829	0.647962	PDCD4;MAPK3
regulation of cellular amine metabolic process (GO:0033238)	1/52	0.465245	0.568564	0.521907	0.644853	-0.83565	0.639433	PSME4
cellular response to interleukin-1 (GO:0071347)	3/151	0.270038	0.429027	0.357664	0.537968	-0.484538	0.634354	PYCARD;PSME4;MAPK3
response to UV (GO:0009411)	2/99	0.331789	0.476539	0.407518	0.566683	-0.572439	0.631547	SDF4;CCAR2
negative regulation of protein catabolic process (GO:0042177)	1/40	0.382052	0.509458	0.434831	0.586689	-0.6522	0.627546	CTSA
wound healing (GO:0042060)	1/51	0.45876	0.563315	0.515192	0.640552	-0.802058	0.624985	CORO1B
positive regulation of interleukin-8 production (GO:0032757)	1/45	0.418177	0.535483	0.472882	0.612465	-0.712914	0.621555	PYCARD
negative regulation of Ras protein signal transduction (GO:0046580)	1/38	0.366985	0.498545	0.418857	0.572944	-0.619449	0.620957	ARAP3
toll-like receptor signaling pathway (GO:0002224)	2/87	0.278929	0.437449	0.348426	0.532569	-0.484886	0.619102	CTSB;LGMN
positive regulation of macromolecule metabolic process (GO:0010604)	5/277	0.237596	0.411647	0.349746	0.532569	-0.430444	0.618627	GBA;CTSH;PIK3CD;CLU;MAPK3
positive regulation of ATPase activity (GO:0032781)	1/36	0.351551	0.488043	0.402433	0.563476	-0.591545	0.618401	TMSB4X
positive regulation of ion transport (GO:0043270)	1/47	0.432031	0.544854	0.487378	0.622085	-0.730966	0.61347	CCR1
regulation of cardiac muscle contraction (GO:0055117)	1/36	0.351551	0.488043	0.402433	0.563476	-0.585916	0.612517	SLC8A1
regulation of intracellular signal transduction (GO:1902531)	7/423	0.243505	0.413854	0.382994	0.552176	-0.431065	0.608931	PYCARD;RRAS;TMSB4X;ARAP3;RAC1;ARHGAP15;MAPK3
mitochondrial translation (GO:0032543)	2/108	0.370731	0.502316	0.450109	0.596475	-0.613065	0.608332	GFM2;MRRF
negative regulation of viral genome replication (GO:0045071)	1/51	0.45876	0.563315	0.515192	0.640552	-0.777352	0.605734	RNASEL
intrinsic apoptotic signaling pathway by p53 class mediator (GO:0072332)	1/44	0.411124	0.532043	0.465481	0.608854	-0.677223	0.601957	PYCARD
regulation of type I interferon-mediated signaling pathway (GO:0060338)	1/40	0.382052	0.509458	0.434831	0.586689	-0.625499	0.601853	RNASEL
regulation of telomere maintenance via telomerase (GO:0032210)	1/52	0.465245	0.568564	0.521907	0.644853	-0.78385	0.599796	MAPK3
post-translational protein modification (GO:0043687)	6/358	0.257869	0.422383	0.388312	0.555132	-0.441182	0.597936	ARSA;GOLM1;PSME4;DCUN1D1;UBA3;APOE
cellular response to organonitrogen compound (GO:0071417)	2/98	0.327416	0.472312	0.402686	0.563476	-0.53484	0.597161	RAP1A;LAMTOR2
T cell receptor signaling pathway (GO:0050852)	3/164	0.312315	0.462776	0.406297	0.566683	-0.509174	0.592548	STOML2;PSME4;PIK3CD
negative regulation of protein secretion (GO:0050709)	1/43	0.403986	0.527883	0.457978	0.605035	-0.65264	0.591536	RAB11FIP5
positive regulation of tyrosine phosphorylation of STAT protein (GO:0042531)	1/54	0.477982	0.577957	0.535062	0.652957	-0.795116	0.58694	CSF1R
regulation of intracellular transport (GO:0032386)	1/41	0.389451	0.513221	0.442654	0.5917	-0.622229	0.586772	STXBP2
polyol metabolic process (GO:0019751)	1/48	0.438834	0.549062	0.494477	0.6261	-0.707625	0.582824	MINPP1
regulation of coenzyme metabolic process (GO:0051196)	1/40	0.382052	0.509458	0.434831	0.586689	-0.597803	0.575204	PGAM1
autophagy of mitochondrion (GO:0000422)	1/41	0.389451	0.513221	0.442654	0.5917	-0.605651	0.571138	WDR45B
viral life cycle (GO:0019058)	2/108	0.370731	0.502316	0.450109	0.596475	-0.575499	0.571056	CHMP2B;APOE
negative regulation of ERBB signaling pathway (GO:1901185)	1/44	0.411124	0.532043	0.465481	0.608854	-0.633863	0.563416	LGMN
regulation of metal ion transport (GO:0010959)	1/38	0.366985	0.498545	0.418857	0.572944	-0.558438	0.559798	IL16
nucleus organization (GO:0006997)	1/46	0.425145	0.539789	0.48018	0.617375	-0.654331	0.559666	CHMP2B
positive regulation of cell-substrate adhesion (GO:0010811)	1/53	0.471652	0.573807	0.52853	0.649489	-0.740447	0.556457	RAC1
cellular response to metal ion (GO:0071248)	2/101	0.340509	0.482208	0.417124	0.572944	-0.515318	0.555159	NCF1;MAPK3
actin filament bundle assembly (GO:0051017)	1/38	0.366985	0.498545	0.418857	0.572944	-0.548752	0.550088	CORO1B
chemical homeostasis (GO:0048878)	1/39	0.374564	0.504086	0.426899	0.580437	-0.559849	0.549768	ACOX3
negative regulation of transport (GO:0051051)	1/41	0.389451	0.513221	0.442654	0.5917	-0.581358	0.54823	MTMR2
negative regulation of protein ubiquitination (GO:0031397)	1/51	0.45876	0.563315	0.515192	0.640552	-0.696792	0.54296	UBXN1
regulation of reactive oxygen species metabolic process (GO:2000377)	1/50	0.452198	0.558286	0.508382	0.634667	-0.676321	0.536753	RAC1
lymphocyte chemotaxis (GO:0048247)	1/45	0.418177	0.535483	0.472882	0.612465	-0.615377	0.536517	PIK3CD
positive regulation of cell migration (GO:0030335)	4/222	0.274646	0.435808	0.379856	0.55201	-0.414648	0.535839	CCR1;CSF1R;CTSH;PIK3CD
regulation of focal adhesion assembly (GO:0051893)	1/45	0.418177	0.535483	0.472882	0.612465	-0.611458	0.5331	RAC1
mitotic metaphase plate congression (GO:0007080)	1/44	0.411124	0.532043	0.465481	0.608854	-0.590881	0.525211	CHMP2B
regulation of intrinsic apoptotic signaling pathway (GO:2001242)	1/48	0.438834	0.549062	0.494477	0.6261	-0.631512	0.520136	PYCARD
negative regulation of cellular response to growth factor stimulus (GO:0090288)	1/56	0.490418	0.585838	0.547856	0.659927	-0.727939	0.518655	CASK
positive regulation of interferon-gamma production (GO:0032729)	1/44	0.411124	0.532043	0.465481	0.608854	-0.581837	0.517172	PYCARD
positive regulation of chemotaxis (GO:0050921)	1/49	0.445556	0.552751	0.501478	0.631752	-0.639468	0.516967	TMSB4X
regulation of extrinsic apoptotic signaling pathway via death domain receptors (GO:1902041)	1/40	0.382052	0.509458	0.434831	0.586689	-0.534404	0.514202	TRADD
cellular divalent inorganic cation homeostasis (GO:0072503)	2/102	0.344856	0.483409	0.421898	0.576109	-0.479565	0.510558	CCR1;STOML2
regulation of insulin secretion (GO:0050796)	2/99	0.331789	0.476539	0.407518	0.566683	-0.460729	0.508302	RAP1A;ITPR3
cellular response to amino acid starvation (GO:0034198)	1/40	0.382052	0.509458	0.434831	0.586689	-0.526287	0.506392	MAPK3
carboxylic acid transport (GO:0046942)	1/52	0.465245	0.568564	0.521907	0.644853	-0.660954	0.505757	PSAP
glutathione metabolic process (GO:0006749)	1/50	0.452198	0.558286	0.508382	0.634667	-0.635014	0.50397	ETHE1
positive regulation of telomerase activity (GO:0051973)	1/36	0.351551	0.488043	0.402433	0.563476	-0.479989	0.501781	MAPK3
cellular glucose homeostasis (GO:0001678)	1/34	0.335743	0.476539	0.385547	0.552176	-0.45756	0.499385	PCK2
adherens junction organization (GO:0034332)	1/45	0.418177	0.535483	0.472882	0.612465	-0.56761	0.494872	NECTIN2
axon guidance (GO:0007411)	3/159	0.296004	0.44954	0.387693	0.554747	-0.406235	0.494543	PIK3CD;PLXNB2;MAPK3
JAK-STAT cascade (GO:0007259)	1/41	0.389451	0.513221	0.442654	0.5917	-0.523539	0.493706	MAPK3
positive regulation of cell division (GO:0051781)	1/42	0.396763	0.519828	0.450369	0.596475	-0.521968	0.482516	SVIL
fatty acid biosynthetic process (GO:0006633)	1/48	0.438834	0.549062	0.494477	0.6261	-0.58342	0.480525	ACLY
positive regulation of ossification (GO:0045778)	1/53	0.471652	0.573807	0.52853	0.649489	-0.630313	0.473689	SLC8A1
response to lipopolysaccharide (GO:0032496)	3/156	0.286242	0.441488	0.376464	0.548762	-0.377988	0.472832	PYCARD;PDCD4;CCR5
autophagosome assembly (GO:0000045)	1/59	0.50852	0.59534	0.566393	0.668804	-0.699183	0.472824	WDR45B
protein localization to organelle (GO:0033365)	2/98	0.327416	0.472312	0.402686	0.563476	-0.423205	0.472518	MTCH2;PIKFYVE
positive regulation of peptidyl-tyrosine phosphorylation (GO:0050731)	2/117	0.408748	0.532043	0.490929	0.625106	-0.526552	0.471083	CSF1R;UNC119
regulation of cell-matrix adhesion (GO:0001952)	1/53	0.471652	0.573807	0.52853	0.649489	-0.623066	0.468243	CASK
positive regulation of cellular component organization (GO:0051130)	2/107	0.366445	0.498545	0.44546	0.594948	-0.465373	0.467191	GBA;APOE
actin filament bundle organization (GO:0061572)	1/36	0.351551	0.488043	0.402433	0.563476	-0.445309	0.465525	CORO1B
regulation of phosphoprotein phosphatase activity (GO:0043666)	1/36	0.351551	0.488043	0.402433	0.563476	-0.442734	0.462834	CD300A
keratinocyte differentiation (GO:0030216)	1/60	0.51441	0.600461	0.572403	0.673615	-0.696193	0.462783	TXNIP
interleukin-1-mediated signaling pathway (GO:0070498)	2/96	0.318649	0.467378	0.392968	0.557297	-0.402643	0.460488	PSME4;MAPK3
negative regulation of cellular biosynthetic process (GO:0031327)	1/48	0.438834	0.549062	0.494477	0.6261	-0.556509	0.458361	AP2A1
Fc-epsilon receptor signaling pathway (GO:0038095)	3/183	0.374273	0.504086	0.475221	0.614672	-0.466312	0.458277	PSME4;RAC1;MAPK3
positive regulation of viral life cycle (GO:1903902)	1/45	0.418177	0.535483	0.472882	0.612465	-0.525238	0.457929	CHMP2B
negative regulation of cell growth (GO:0030308)	2/116	0.404577	0.527883	0.486487	0.622085	-0.49965	0.45214	PPT1;CCAR2
cell morphogenesis involved in differentiation (GO:0000904)	1/55	0.484237	0.581939	0.541503	0.656267	-0.618385	0.448441	RAC1
I-kappaB kinase/NF-kappaB signaling (GO:0007249)	1/58	0.502558	0.592741	0.5603	0.666803	-0.648374	0.44611	TRADD
macromolecular complex assembly (GO:0065003)	2/121	0.425288	0.539789	0.508455	0.634667	-0.520125	0.444701	CARD10;CAPZA1
sodium ion transport (GO:0006814)	1/59	0.50852	0.59534	0.566393	0.668804	-0.648752	0.43872	SLC8A1
sensory perception (GO:0007600)	1/55	0.484237	0.581939	0.541503	0.656267	-0.60088	0.435746	NIPSNAP1
tRNA modification (GO:0006400)	1/58	0.502558	0.592741	0.5603	0.666803	-0.624374	0.429597	AARS
regulation of cellular response to stress (GO:0080135)	2/105	0.35784	0.492348	0.436098	0.587897	-0.416903	0.428438	CCAR2;MAPK3
positive regulation of immune response (GO:0050778)	1/55	0.484237	0.581939	0.541503	0.656267	-0.589277	0.427332	PYCARD
nuclear envelope disassembly (GO:0051081)	1/47	0.432031	0.544854	0.487378	0.622085	-0.508454	0.426725	DCTN1
metal ion homeostasis (GO:0055065)	1/46	0.425145	0.539789	0.48018	0.617375	-0.495931	0.424182	SLC8A1
regulation of cellular ketone metabolic process (GO:0010565)	1/62	0.525981	0.608142	0.584174	0.680391	-0.659342	0.42362	PSME4
cellular calcium ion homeostasis (GO:0006874)	2/124	0.437535	0.549062	0.52134	0.644853	-0.512169	0.423359	CCR1;STOML2
regulation of phosphorylation (GO:0042325)	2/120	0.421175	0.538452	0.50411	0.633236	-0.484667	0.419095	PGAM1;PLXNB2
protein localization to cell periphery (GO:1990778)	2/118	0.412905	0.533911	0.495347	0.626701	-0.468208	0.414147	FCHO2;FAM126A
monocarboxylic acid transport (GO:0015718)	1/54	0.477982	0.577957	0.535062	0.652957	-0.560154	0.413496	GOT2
positive regulation of DNA biosynthetic process (GO:2000573)	1/56	0.490418	0.585838	0.547856	0.659927	-0.579631	0.412986	MAPK3
negative regulation of protein modification by small protein conjugation or removal (GO:1903321)	1/47	0.432031	0.544854	0.487378	0.622085	-0.489549	0.410858	UBXN1
protein dephosphorylation (GO:0006470)	2/126	0.44562	0.552751	0.529804	0.650046	-0.503304	0.406814	MTMR2;MTMR3
chemokine-mediated signaling pathway (GO:0070098)	1/53	0.471652	0.573807	0.52853	0.649489	-0.534081	0.40137	CCR1
regulation of neurogenesis (GO:0050767)	1/58	0.502558	0.592741	0.5603	0.666803	-0.57101	0.392881	PLXNB2
response to glucose (GO:0009749)	1/48	0.438834	0.549062	0.494477	0.6261	-0.475529	0.391662	PCK2
Fc receptor signaling pathway (GO:0038093)	3/184	0.377515	0.507626	0.478753	0.617375	-0.401897	0.391506	PSME4;RAC1;MAPK3
negative regulation of viral life cycle (GO:1903901)	1/62	0.525981	0.608142	0.584174	0.680391	-0.60717	0.3901	RNASEL
RNA modification (GO:0009451)	1/55	0.484237	0.581939	0.541503	0.656267	-0.537843	0.390033	AARS
cellular response to mechanical stimulus (GO:0071260)	1/49	0.445556	0.552751	0.501478	0.631752	-0.481841	0.389536	MAPK3
actin filament organization (GO:0007015)	2/121	0.425288	0.539789	0.508455	0.634667	-0.453942	0.388115	RAC1;CORO1B
small GTPase mediated signal transduction (GO:0007264)	2/100	0.336153	0.476693	0.41233	0.568434	-0.354065	0.385998	USP8;RRAS
regulation of protein dephosphorylation (GO:0035304)	1/41	0.389451	0.513221	0.442654	0.5917	-0.399973	0.377181	GBA
sterol homeostasis (GO:0055092)	1/59	0.50852	0.59534	0.566393	0.668804	-0.557007	0.376677	APOE
stress-activated MAPK cascade (GO:0051403)	1/63	0.531663	0.613212	0.589939	0.683661	-0.589844	0.372631	MAPK3
negative regulation of neuron projection development (GO:0010977)	1/52	0.465245	0.568564	0.521907	0.644853	-0.486817	0.372508	APOE
aminoglycan biosynthetic process (GO:0006023)	1/47	0.432031	0.544854	0.487378	0.622085	-0.439219	0.368619	HEXA
negative regulation of ossification (GO:0030279)	1/46	0.425145	0.539789	0.48018	0.617375	-0.427147	0.365349	CCR1
regulation of cysteine-type endopeptidase activity (GO:2000116)	1/37	0.359314	0.492348	0.410702	0.566683	-0.3562	0.364591	PYCARD
peptidyl-tyrosine modification (GO:0018212)	1/52	0.465245	0.568564	0.521907	0.644853	-0.471686	0.36093	CSF1R
macroautophagy (GO:0016236)	2/111	0.383518	0.509641	0.463922	0.608854	-0.373319	0.357777	MTMR3;CHMP2B
sterol metabolic process (GO:0016125)	1/60	0.51441	0.600461	0.572403	0.673615	-0.534765	0.355477	APOE
positive regulation of phosphatidylinositol 3-kinase signaling (GO:0014068)	1/54	0.477982	0.577957	0.535062	0.652957	-0.479636	0.354059	NCF1
regulation of interferon-gamma production (GO:0032649)	1/44	0.411124	0.532043	0.465481	0.608854	-0.393053	0.349369	PYCARD
dephosphorylation (GO:0016311)	2/125	0.441585	0.550765	0.525585	0.648385	-0.426187	0.348358	MTMR2;MTMR3
Fc-gamma receptor signaling pathway involved in phagocytosis (GO:0038096)	2/134	0.4773	0.577957	0.562638	0.668581	-0.462468	0.342047	RAC1;MAPK3
regulation of protein phosphorylation (GO:0001932)	4/262	0.382415	0.509458	0.502131	0.631752	-0.354005	0.340286	CSF1R;PLXNB2;RAC1;MAPK3
cell chemotaxis (GO:0060326)	1/61	0.52023	0.60547	0.578329	0.678191	-0.518194	0.338631	CORO1B
positive regulation of JAK-STAT cascade (GO:0046427)	1/65	0.542825	0.619477	0.60123	0.689108	-0.552537	0.337583	CSF1R
protein modification by small protein removal (GO:0070646)	4/262	0.382415	0.509458	0.502131	0.631752	-0.350093	0.336526	USP24;USP8;PSME4;OTUB1
metaphase plate congression (GO:0051310)	1/45	0.418177	0.535483	0.472882	0.612465	-0.382228	0.333246	CHMP2B
protein targeting to membrane (GO:0006612)	1/62	0.525981	0.608142	0.584174	0.680391	-0.51733	0.33238	NCF1
regulation of epithelial cell migration (GO:0010632)	1/49	0.445556	0.552751	0.501478	0.631752	-0.40639	0.328539	CTSH
cytoskeleton organization (GO:0007010)	2/127	0.449639	0.556863	0.533998	0.652957	-0.409845	0.327593	ARAP3;APOE
cholesterol homeostasis (GO:0042632)	1/59	0.50852	0.59534	0.566393	0.668804	-0.479334	0.32415	APOE
positive regulation of leukocyte chemotaxis (GO:0002690)	1/62	0.525981	0.608142	0.584174	0.680391	-0.501758	0.322374	CCR1
iron ion homeostasis (GO:0055072)	1/64	0.537278	0.614919	0.595623	0.685161	-0.518094	0.321861	SLC40A1
adenylate cyclase-inhibiting G-protein coupled receptor signaling pathway (GO:0007193)	1/64	0.537278	0.614919	0.595623	0.685161	-0.517149	0.321274	PSAP
peptidyl-tyrosine autophosphorylation (GO:0038083)	1/46	0.425145	0.539789	0.48018	0.617375	-0.373671	0.31961	MAPK3
positive regulation of viral process (GO:0048524)	1/45	0.418177	0.535483	0.472882	0.612465	-0.36497	0.3182	APOE
cellular response to insulin stimulus (GO:0032869)	2/111	0.383518	0.509641	0.463922	0.608854	-0.33036	0.316607	MARS;PCK2
protein localization to plasma membrane (GO:0072659)	2/131	0.465547	0.568564	0.550519	0.662127	-0.413587	0.316204	FCHO2;FAM126A
neutrophil migration (GO:1990266)	1/59	0.50852	0.59534	0.566393	0.668804	-0.465152	0.31456	PIK3CD
regulation of viral genome replication (GO:0045069)	1/64	0.537278	0.614919	0.595623	0.685161	-0.497025	0.308772	RNASEL
organonitrogen compound biosynthetic process (GO:1901566)	3/182	0.371029	0.502316	0.471679	0.612465	-0.310936	0.308286	ALDH3B1;GOT2;ALDH18A1
regulation of telomerase activity (GO:0051972)	1/43	0.403986	0.527883	0.457978	0.605035	-0.339893	0.308071	MAPK3
regulation of glycolytic process (GO:0006110)	1/58	0.502558	0.592741	0.5603	0.666803	-0.447542	0.307929	PGAM1
cellular response to lipid (GO:0071396)	3/179	0.361278	0.494611	0.46099	0.608507	-0.302189	0.307661	PYCARD;PDCD4;CCR5
regulation of TOR signaling (GO:0032006)	1/68	0.559073	0.633003	0.617589	0.703785	-0.52851	0.307316	LAMTOR2
fat cell differentiation (GO:0045444)	1/56	0.490418	0.585838	0.547856	0.659927	-0.428555	0.305345	SDF4
epithelium development (GO:0060429)	2/116	0.404577	0.527883	0.486487	0.622085	-0.336854	0.304824	TPP1;CTSB
protein heterooligomerization (GO:0051291)	1/50	0.452198	0.558286	0.508382	0.634667	-0.383731	0.304543	ITPR3
ATP metabolic process (GO:0046034)	1/57	0.496524	0.589588	0.554121	0.663939	-0.434465	0.304179	UQCRC2
negative regulation of supramolecular fiber organization (GO:1902904)	1/55	0.484237	0.581939	0.541503	0.656267	-0.415349	0.301203	CLU
positive regulation of kinase activity (GO:0033674)	2/114	0.396193	0.519828	0.477531	0.616974	-0.325198	0.301085	CSF1R;RAP1A
negative regulation of cell cycle G2/M phase transition (GO:1902750)	1/70	0.569584	0.640782	0.628122	0.709661	-0.516764	0.290861	PSME4
brain development (GO:0007420)	2/120	0.421175	0.538452	0.50411	0.633236	-0.335873	0.290432	PPT1;PLXNB2
fibroblast growth factor receptor signaling pathway (GO:0008543)	1/79	0.613879	0.673863	0.672061	0.739267	-0.594353	0.290019	MAPK3
extrinsic apoptotic signaling pathway (GO:0097191)	1/68	0.559073	0.633003	0.617589	0.703785	-0.495529	0.288138	TRADD
negative regulation of dephosphorylation (GO:0035305)	1/64	0.537278	0.614919	0.595623	0.685161	-0.460274	0.285941	FKBP15
regulation of protein secretion (GO:0050708)	2/108	0.370731	0.502316	0.450109	0.596475	-0.286475	0.284263	RAP1A;ITPR3
regulation of hydrolase activity (GO:0051336)	1/81	0.623088	0.678798	0.6811	0.744043	-0.596208	0.282046	PLXNB2
SCF-dependent proteasomal ubiquitin-dependent protein catabolic process (GO:0031146)	1/73	0.584884	0.650574	0.643383	0.719209	-0.521681	0.279799	PSME4
modification-dependent protein catabolic process (GO:0019941)	2/142	0.507858	0.59534	0.593807	0.685161	-0.412669	0.279605	LONP1;PCYOX1
regulation of protein localization (GO:0032880)	1/42	0.396763	0.519828	0.450369	0.596475	-0.301048	0.278294	AAK1
positive regulation of protein binding (GO:0032092)	1/61	0.52023	0.60547	0.578329	0.678191	-0.424729	0.277553	APOE
negative regulation of cellular response to transforming growth factor beta stimulus (GO:1903845)	1/54	0.477982	0.577957	0.535062	0.652957	-0.375284	0.277028	SNX6
diterpenoid metabolic process (GO:0016101)	1/63	0.531663	0.613212	0.589939	0.683661	-0.431611	0.272668	APOE
phospholipid metabolic process (GO:0006644)	1/71	0.574745	0.6443	0.63328	0.712946	-0.489089	0.270872	PLA2G15
epidermal growth factor receptor signaling pathway (GO:0007173)	1/58	0.502558	0.592741	0.5603	0.666803	-0.386909	0.266211	PXN
negative regulation of transforming growth factor beta receptor signaling pathway (GO:0030512)	1/56	0.490418	0.585838	0.547856	0.659927	-0.372531	0.265428	SNX6
positive regulation of defense response (GO:0031349)	1/75	0.594782	0.657915	0.653209	0.726604	-0.508099	0.263988	PDCD4
response to metal ion (GO:0010038)	1/73	0.584884	0.650574	0.643383	0.719209	-0.491711	0.263725	ITPR3
cell junction assembly (GO:0034329)	1/60	0.51441	0.600461	0.572403	0.673615	-0.395137	0.262661	CAPZA1
granulocyte chemotaxis (GO:0071621)	1/57	0.496524	0.589588	0.554121	0.663939	-0.373956	0.261815	PIK3CD
regulation of cellular catabolic process (GO:0031329)	1/56	0.490418	0.585838	0.547856	0.659927	-0.36105	0.257247	PSAP
negative regulation of blood vessel morphogenesis (GO:2000181)	1/66	0.548306	0.623934	0.606759	0.693939	-0.424847	0.2553	SARS
cellular response to hypoxia (GO:0071456)	2/133	0.4734	0.575491	0.558624	0.666803	-0.337008	0.25202	FAM162A;PSME4
negative regulation of cellular catabolic process (GO:0031330)	1/57	0.496524	0.589588	0.554121	0.663939	-0.356644	0.249695	MTMR2
Rab protein signal transduction (GO:0032482)	1/71	0.574745	0.6443	0.63328	0.712946	-0.448391	0.248332	RAB24
carbohydrate homeostasis (GO:0033500)	1/64	0.537278	0.614919	0.595623	0.685161	-0.39725	0.246788	PYGL
enzyme linked receptor protein signaling pathway (GO:0007167)	2/121	0.425288	0.539789	0.508455	0.634667	-0.286854	0.245257	CSF1R;CNPY2
glucose homeostasis (GO:0042593)	1/75	0.594782	0.657915	0.653209	0.726604	-0.471793	0.245125	PYGL
G2/M transition of mitotic cell cycle (GO:0000086)	2/127	0.449639	0.556863	0.533998	0.652957	-0.305256	0.243995	DCTN1;DNM2
regulation of transcription from RNA polymerase II promoter in response to hypoxia (GO:0061418)	1/79	0.613879	0.673863	0.672061	0.739267	-0.496045	0.242049	PSME4
phosphatidylcholine metabolic process (GO:0046470)	1/72	0.579845	0.647725	0.638367	0.716445	-0.440804	0.240235	PLA2G15
regulation of MAPK cascade (GO:0043408)	3/204	0.441387	0.550765	0.546866	0.659927	-0.293642	0.24015	CSF1R;RRAS;MAPK3
regulation of phosphatase activity (GO:0010921)	1/73	0.584884	0.650574	0.643383	0.719209	-0.445557	0.238971	FKBP15
organelle membrane fusion (GO:0090174)	1/72	0.579845	0.647725	0.638367	0.716445	-0.438157	0.238793	CHMP2B
defense response to Gram-negative bacterium (GO:0050829)	1/72	0.579845	0.647725	0.638367	0.716445	-0.436917	0.238117	PYCARD
cellular response to organic substance (GO:0071310)	2/134	0.4773	0.577957	0.562638	0.668581	-0.319402	0.236233	CSF1R;MAPK3
positive regulation of T cell proliferation (GO:0042102)	1/62	0.525981	0.608142	0.584174	0.680391	-0.365561	0.234869	PYCARD
regulation of endothelial cell proliferation (GO:0001936)	1/80	0.618511	0.676137	0.676612	0.741698	-0.482086	0.231613	APOE
cell-cell adhesion via plasma-membrane adhesion molecules (GO:0098742)	2/143	0.511595	0.598499	0.597585	0.68692	-0.343536	0.230245	PLXNB2;NECTIN2
protein autophosphorylation (GO:0046777)	3/176	0.351506	0.488043	0.45021	0.596475	-0.219441	0.229432	CSF1R;AAK1;MAPK3
negative regulation of angiogenesis (GO:0016525)	1/70	0.569584	0.640782	0.628122	0.709661	-0.40419	0.227498	SARS
triglyceride metabolic process (GO:0006641)	1/53	0.471652	0.573807	0.52853	0.649489	-0.301498	0.22658	APOE
positive regulation of binding (GO:0051099)	1/82	0.627611	0.682785	0.685527	0.747847	-0.484945	0.225904	APOE
response to light stimulus (GO:0009416)	1/59	0.50852	0.59534	0.566393	0.668804	-0.328549	0.222181	CCAR2
inositol phosphate metabolic process (GO:0043647)	1/48	0.438834	0.549062	0.494477	0.6261	-0.269714	0.222146	MINPP1
stimulatory C-type lectin receptor signaling pathway (GO:0002223)	2/122	0.429386	0.544553	0.512775	0.639052	-0.260595	0.220307	CARD9;PSME4
protein targeting to mitochondrion (GO:0006626)	1/55	0.484237	0.581939	0.541503	0.656267	-0.299557	0.217233	UQCRC2
regulation of cell cycle G2/M phase transition (GO:1902749)	1/85	0.640856	0.691968	0.698443	0.757172	-0.483944	0.215331	DCTN1
Rho protein signal transduction (GO:0007266)	1/73	0.584884	0.650574	0.643383	0.719209	-0.394514	0.211594	RAC1
positive regulation of cysteine-type endopeptidase activity (GO:2001056)	1/56	0.490418	0.585838	0.547856	0.659927	-0.294494	0.209827	PYCARD
cellular response to peptide hormone stimulus (GO:0071375)	2/111	0.383518	0.509641	0.463922	0.608854	-0.217623	0.208563	MARS;PCK2
lymphocyte differentiation (GO:0030098)	1/74	0.589863	0.653386	0.64833	0.722191	-0.394823	0.208413	PIK3CD
response to calcium ion (GO:0051592)	1/80	0.618511	0.676137	0.676612	0.741698	-0.431952	0.207527	ITPR3
regulation of actin cytoskeleton organization (GO:0032956)	1/76	0.599643	0.662367	0.658021	0.731442	-0.404285	0.20676	CSF1R
positive regulation of proteasomal ubiquitin-dependent protein catabolic process (GO:0032436)	1/71	0.574745	0.6443	0.63328	0.712946	-0.373078	0.206621	CLU
positive regulation of protein catabolic process (GO:0045732)	1/82	0.627611	0.682785	0.685527	0.747847	-0.441723	0.20577	APOE
regulation of innate immune response (GO:0045088)	1/70	0.569584	0.640782	0.628122	0.709661	-0.365256	0.205584	RNASEL
regulation of tyrosine phosphorylation of STAT protein (GO:0042509)	1/62	0.525981	0.608142	0.584174	0.680391	-0.318253	0.204475	CSF1R
innate immune response activating cell surface receptor signaling pathway (GO:0002220)	2/125	0.441585	0.550765	0.525585	0.648385	-0.249489	0.203929	CARD9;PSME4
neutrophil chemotaxis (GO:0030593)	1/54	0.477982	0.577957	0.535062	0.652957	-0.273934	0.202213	PIK3CD
regulation of cellular amino acid metabolic process (GO:0006521)	1/52	0.465245	0.568564	0.521907	0.644853	-0.263388	0.201542	PSME4
regulation of I-kappaB kinase/NF-kappaB signaling (GO:0043122)	3/205	0.444521	0.552751	0.550136	0.662127	-0.245297	0.198876	PYCARD;TRADD;CARD9
positive regulation of response to external stimulus (GO:0032103)	1/91	0.665956	0.714201	0.722712	0.777701	-0.475756	0.19341	PDCD4
autophagosome organization (GO:1905037)	1/57	0.496524	0.589588	0.554121	0.663939	-0.274404	0.192116	WDR45B
positive regulation of ubiquitin-protein ligase activity involved in regulation of mitotic cell cycle transition (GO:0051437)	1/77	0.604445	0.665815	0.662766	0.733628	-0.381436	0.192032	PSME4
negative regulation of immune response (GO:0050777)	1/45	0.418177	0.535483	0.472882	0.612465	-0.220141	0.19193	CD300A
regulation of endopeptidase activity (GO:0052548)	1/69	0.56436	0.637167	0.622892	0.707237	-0.335446	0.191897	SERPINB8
neuron projection development (GO:0031175)	3/168	0.325383	0.472312	0.421063	0.575464	-0.170301	0.191206	APOE;RAC1;DNM2
response to interferon-gamma (GO:0034341)	1/69	0.56436	0.637167	0.622892	0.707237	-0.332309	0.190102	IRF8
muscle contraction (GO:0006936)	2/138	0.492723	0.588149	0.578432	0.678191	-0.261931	0.185397	PXN;SLC8A1
positive regulation of cellular protein localization (GO:1903829)	1/67	0.553722	0.629193	0.612211	0.699166	-0.312888	0.184946	CARD10
regulation of cell death (GO:0010941)	1/97	0.689309	0.732796	0.745037	0.794171	-0.496498	0.18473	CLU
B cell activation (GO:0042113)	1/74	0.589863	0.653386	0.64833	0.722191	-0.347242	0.183297	PIK3CD
anaphase-promoting complex-dependent catabolic process (GO:0031145)	1/80	0.618511	0.676137	0.676612	0.741698	-0.380543	0.182828	PSME4
negative regulation of extrinsic apoptotic signaling pathway (GO:2001237)	1/77	0.604445	0.665815	0.662766	0.733628	-0.362845	0.182672	TRADD
negative regulation of mitotic cell cycle phase transition (GO:1901991)	1/80	0.618511	0.676137	0.676612	0.741698	-0.376544	0.180907	PSME4
response to retinoic acid (GO:0032526)	1/58	0.502558	0.592741	0.5603	0.666803	-0.259271	0.17839	CTSH
skin development (GO:0043588)	1/95	0.681711	0.726669	0.737801	0.789647	-0.464164	0.177844	TXNIP
regulation of cell growth (GO:0001558)	3/202	0.435101	0.548289	0.540286	0.656267	-0.213132	0.177364	PPT1;LAMTOR2;CCAR2
negative regulation of phosphatase activity (GO:0010923)	1/69	0.56436	0.637167	0.622892	0.707237	-0.307153	0.175711	FKBP15
actin cytoskeleton reorganization (GO:0031532)	1/62	0.525981	0.608142	0.584174	0.680391	-0.269526	0.173168	RAC1
ERBB signaling pathway (GO:0038127)	1/81	0.623088	0.678798	0.6811	0.744043	-0.364047	0.172219	PXN
protein localization to nucleus (GO:0034504)	1/97	0.689309	0.732796	0.745037	0.794171	-0.460563	0.17136	PIKFYVE
protein deubiquitination (GO:0016579)	4/258	0.37159	0.502646	0.490303	0.625106	-0.172499	0.170768	USP24;USP8;PSME4;OTUB1
kidney development (GO:0001822)	1/64	0.537278	0.614919	0.595623	0.685161	-0.27422	0.170357	CTSH
negative regulation of canonical Wnt signaling pathway (GO:0090090)	2/149	0.533627	0.614739	0.619702	0.705686	-0.265737	0.166898	PSME4;APOE
central nervous system development (GO:0007417)	3/218	0.484582	0.581939	0.591355	0.684727	-0.228849	0.165794	PPT1;PLXNB2;TPP1
negative regulation of G2/M transition of mitotic cell cycle (GO:0010972)	1/63	0.531663	0.613212	0.589939	0.683661	-0.259738	0.164088	PSME4
regulation of Notch signaling pathway (GO:0008593)	1/71	0.574745	0.6443	0.63328	0.712946	-0.29217	0.161812	AAK1
positive regulation of cellular amide metabolic process (GO:0034250)	1/62	0.525981	0.608142	0.584174	0.680391	-0.250866	0.161179	CLU
regulation of transcription from RNA polymerase II promoter in response to stress (GO:0043618)	1/94	0.677843	0.72352	0.734107	0.786756	-0.413666	0.160849	PSME4
transforming growth factor beta receptor signaling pathway (GO:0007179)	1/77	0.604445	0.665815	0.662766	0.733628	-0.314587	0.158377	PXN
epidermal cell differentiation (GO:0009913)	1/68	0.559073	0.633003	0.617589	0.703785	-0.269173	0.156518	TXNIP
Fc receptor mediated stimulatory signaling pathway (GO:0002431)	2/136	0.485047	0.582057	0.570587	0.672979	-0.21611	0.156357	RAC1;MAPK3
response to lipid (GO:0033993)	2/141	0.504102	0.593237	0.590003	0.683661	-0.226772	0.155334	CTSH;PCK2
glycosaminoglycan biosynthetic process (GO:0006024)	1/100	0.700368	0.743554	0.755519	0.804262	-0.425031	0.151374	HEXA
negative regulation of cell communication (GO:0010648)	1/79	0.613879	0.673863	0.672061	0.739267	-0.308605	0.150586	CSF1R
positive regulation of response to DNA damage stimulus (GO:2001022)	1/50	0.452198	0.558286	0.508382	0.634667	-0.18698	0.148394	CCAR2
protein localization to membrane (GO:0072657)	2/161	0.575621	0.644826	0.661118	0.733628	-0.266979	0.147454	FCHO2;FAM126A
cellular response to nutrient levels (GO:0031669)	1/55	0.484237	0.581939	0.541503	0.656267	-0.195883	0.142051	MARS
positive regulation of mitochondrion organization (GO:0010822)	2/129	0.457627	0.563315	0.54231	0.656742	-0.180389	0.141011	PYCARD;FAM162A
establishment of protein localization to membrane (GO:0090150)	1/84	0.636494	0.688666	0.694197	0.753672	-0.308913	0.139561	NCF1
inflammatory response (GO:0006954)	4/253	0.358042	0.492348	0.475362	0.614672	-0.135544	0.139218	CSF1R;PIK3CD;RAC1;SIGLEC1
regulation of lipid metabolic process (GO:0019216)	1/101	0.703967	0.746374	0.758917	0.806254	-0.393249	0.13804	PSAP
protein homotetramerization (GO:0051289)	1/58	0.502558	0.592741	0.5603	0.666803	-0.199085	0.136979	ACOT13
stress-activated protein kinase signaling cascade (GO:0031098)	1/71	0.574745	0.6443	0.63328	0.712946	-0.243692	0.134963	MAPK3
cellular response to acid chemical (GO:0071229)	1/92	0.669966	0.71753	0.726563	0.780784	-0.329952	0.132155	LAMTOR2
regulation of kinase activity (GO:0043549)	1/102	0.707522	0.748641	0.762268	0.808187	-0.379679	0.131364	CSF1R
negative regulation of signal transduction (GO:0009968)	4/284	0.441404	0.550765	0.564881	0.668804	-0.15981	0.130692	CSF1R;MTMR2;GBA;LGMN
positive regulation of cell death (GO:0010942)	1/58	0.502558	0.592741	0.5603	0.666803	-0.186758	0.128498	CLU
regulation of protein ubiquitination (GO:0031396)	1/102	0.707522	0.748641	0.762268	0.808187	-0.360749	0.124814	UBXN1
ciliary basal body-plasma membrane docking (GO:0097711)	1/97	0.689309	0.732796	0.745037	0.794171	-0.328037	0.122051	DCTN1
regulation of mitotic nuclear division (GO:0007088)	1/85	0.640856	0.691968	0.698443	0.757172	-0.274134	0.121976	CHMP2B
mitotic sister chromatid segregation (GO:0000070)	1/83	0.632079	0.686233	0.689892	0.751574	-0.264186	0.121193	CHMP2B
heterophilic cell-cell adhesion via plasma membrane cell adhesion molecules (GO:0007157)	1/48	0.438834	0.549062	0.494477	0.6261	-0.145416	0.11977	NECTIN2
regulation of hematopoietic stem cell differentiation (GO:1902036)	1/77	0.604445	0.665815	0.662766	0.733628	-0.23644	0.119035	PSME4
regulation of cell cycle process (GO:0010564)	1/91	0.665956	0.714201	0.722712	0.777701	-0.288556	0.117307	GIT1
regulation of mRNA splicing, via spliceosome (GO:0048024)	1/61	0.52023	0.60547	0.578329	0.678191	-0.176644	0.115434	PRDX6
negative regulation of cell motility (GO:2000146)	1/98	0.69304	0.736268	0.748579	0.797411	-0.298244	0.109356	ARAP3
synapse assembly (GO:0007416)	1/64	0.537278	0.614919	0.595623	0.685161	-0.173664	0.107887	DNM3
cellular transition metal ion homeostasis (GO:0046916)	1/94	0.677843	0.72352	0.734107	0.786756	-0.273778	0.106456	SLC40A1
protein stabilization (GO:0050821)	2/153	0.547935	0.623934	0.633923	0.713164	-0.175269	0.105442	AAK1;CLU
regulation of endothelial cell migration (GO:0010594)	1/70	0.569584	0.640782	0.628122	0.709661	-0.186884	0.105188	ANXA3
regulation of cysteine-type endopeptidase activity involved in apoptotic process (GO:0043281)	1/94	0.677843	0.72352	0.734107	0.786756	-0.270313	0.105108	PYCARD
positive regulation of cell cycle process (GO:0090068)	1/108	0.72798	0.765684	0.781422	0.822987	-0.320284	0.101684	SVIL
protein phosphorylation (GO:0006468)	6/471	0.494849	0.589588	0.64833	0.722191	-0.14026	0.0986729	CSF1R;RNASEL;STK38;AAK1;PIK3CD;MAPK3
negative regulation of cell adhesion (GO:0007162)	1/66	0.548306	0.623934	0.606759	0.693939	-0.162271	0.0975123	PLXNB2
negative regulation of protein kinase activity (GO:0006469)	1/110	0.734478	0.770982	0.787459	0.827694	-0.309086	0.0953827	PYCARD
activation of protein kinase activity (GO:0032147)	3/234	0.531915	0.613212	0.63865	0.716445	-0.150143	0.0947809	CARD10;RAP1A;MAPK3
negative regulation of autophagy (GO:0010507)	1/47	0.432031	0.544854	0.487378	0.622085	-0.111772	0.0938054	CTSA
negative regulation of signaling (GO:0023057)	1/84	0.636494	0.688666	0.694197	0.753672	-0.202535	0.0915013	CSF1R
positive regulation of inflammatory response (GO:0050729)	1/74	0.589863	0.653386	0.64833	0.722191	-0.166832	0.088065	PDCD4
regulation of response to external stimulus (GO:0032101)	1/108	0.72798	0.765684	0.781422	0.822987	-0.268605	0.085277	TMSB4X
cellular response to DNA damage stimulus (GO:0006974)	4/330	0.558084	0.633003	0.680759	0.744043	-0.139098	0.0811283	PYCARD;PSME4;MAPK3;OTUB1
positive regulation of cellular catabolic process (GO:0031331)	1/107	0.724672	0.763219	0.77834	0.820832	-0.248562	0.0800457	APOE
cell cycle G2/M phase transition (GO:0044839)	2/128	0.453641	0.559632	0.538167	0.656241	-0.100302	0.0792838	DCTN1;DNM2
response to cytokine (GO:0034097)	2/139	0.496534	0.589588	0.582315	0.680391	-0.11294	0.0790698	CSF1R;YTHDC2
negative regulation of cellular process (GO:0048523)	7/535	0.457796	0.563315	0.624486	0.708079	-0.0980767	0.0766304	PDCD4;PPT1;CASK;PLXNB2;TXNIP;CLU;CCAR2
regulation of GTPase activity (GO:0043087)	2/189	0.662664	0.712116	0.743707	0.794171	-0.17409	0.0716358	RAP1A;PLXNB2
negative regulation of cellular protein metabolic process (GO:0032269)	1/90	0.661898	0.712116	0.718806	0.775078	-0.173199	0.0714697	APOE
regulation of organelle organization (GO:0033043)	1/114	0.747012	0.782584	0.79904	0.838754	-0.232896	0.0679296	MAPK3
inorganic cation transmembrane transport (GO:0098662)	2/141	0.504102	0.593237	0.590003	0.683661	-0.0982515	0.0673001	SLC40A1;SLC8A1
negative regulation of transmembrane receptor protein serine/threonine kinase signaling pathway (GO:0090101)	1/78	0.60919	0.670109	0.667446	0.737262	-0.130256	0.0645581	SNX6
DNA-templated transcription, initiation (GO:0006352)	2/187	0.656952	0.708321	0.738428	0.789784	-0.151192	0.0635227	TFAM;MAPK3
antigen receptor-mediated signaling pathway (GO:0050851)	3/258	0.598109	0.661134	0.702197	0.760274	-0.120742	0.0620589	STOML2;PSME4;PIK3CD
negative regulation of endopeptidase activity (GO:0010951)	1/84	0.636494	0.688666	0.694197	0.753672	-0.13436	0.0607012	SERPINB8
positive regulation of developmental process (GO:0051094)	1/114	0.747012	0.782584	0.79904	0.838754	-0.208077	0.0606904	CORO1B
negative regulation of multicellular organismal process (GO:0051241)	1/126	0.78119	0.811945	0.830148	0.865101	-0.226804	0.0560063	RAB11FIP5
organic anion transport (GO:0015711)	1/125	0.778527	0.810773	0.82775	0.864308	-0.221337	0.0554122	SCP2
cellular iron ion homeostasis (GO:0006879)	1/57	0.496524	0.589588	0.554121	0.663939	-0.0764924	0.0535541	SLC40A1
protein lipidation (GO:0006497)	1/128	0.786421	0.815777	0.834845	0.868283	-0.219704	0.0527867	WDR45B
negative regulation of intracellular signal transduction (GO:1902532)	2/162	0.578994	0.647725	0.664402	0.734925	-0.0950476	0.0519401	PYCARD;TMSB4X
positive regulation of cell adhesion (GO:0045785)	1/65	0.542825	0.619477	0.60123	0.689108	-0.0830439	0.0507372	RAC1
activation of MAPK activity (GO:0000187)	1/118	0.758958	0.792392	0.809993	0.849125	-0.182889	0.0504423	MAPK3
cellular response to decreased oxygen levels (GO:0036294)	1/65	0.542825	0.619477	0.60123	0.689108	-0.0802511	0.0490309	FAM162A
T cell activation (GO:0042110)	1/89	0.65779	0.708321	0.714846	0.771333	-0.115	0.0481702	PIK3CD
nuclear-transcribed mRNA catabolic process, deadenylation-dependent decay (GO:0000288)	1/64	0.537278	0.614919	0.595623	0.685161	-0.0704939	0.0437936	NT5C3B
Golgi organization (GO:0007030)	1/122	0.770342	0.802777	0.820351	0.85828	-0.138947	0.0362541	TRAPPC11
neuron development (GO:0048666)	1/145	0.826144	0.850301	0.869893	0.89591	-0.176184	0.0336486	PPT1
positive regulation of T cell activation (GO:0050870)	1/69	0.56436	0.637167	0.622892	0.707237	-0.0583084	0.0333561	PYCARD
RNA processing (GO:0006396)	2/194	0.676611	0.72352	0.756506	0.804772	-0.0852829	0.0333165	YTHDC2;CCAR2
male gamete generation (GO:0048232)	1/155	0.845978	0.867895	0.88694	0.910508	-0.197133	0.0329727	HERC4
negative regulation of apoptotic process (GO:0043066)	6/486	0.525394	0.608142	0.677609	0.742277	-0.0504824	0.0324909	CSF1R;TNFAIP8;PPT1;CTSH;APOE;LGMN
organelle assembly (GO:0070925)	4/377	0.662502	0.712116	0.775152	0.818561	-0.0769832	0.0316964	NCF1;WDR45B;CHMP2B;UNC119
regulation of protein catabolic process (GO:0042176)	1/92	0.669966	0.71753	0.726563	0.780784	-0.0719263	0.0288085	CTSA
cellular response to fibroblast growth factor stimulus (GO:0044344)	1/95	0.681711	0.726669	0.737801	0.789647	-0.0693143	0.0265577	MAPK3
plasma membrane bounded cell projection assembly (GO:0120031)	3/242	0.554655	0.629802	0.660825	0.733628	-0.0422053	0.0248762	DNM3;UNC119;RAC1
regulation of protein kinase B signaling (GO:0051896)	2/164	0.585681	0.650574	0.670892	0.739267	-0.0432014	0.0231119	RRAS;PIK3CD
regulation of transforming growth factor beta receptor signaling pathway (GO:0017015)	1/80	0.618511	0.676137	0.676612	0.741698	-0.0469402	0.0225519	SNX6
negative regulation of Wnt signaling pathway (GO:0030178)	2/175	0.621056	0.677983	0.704795	0.762045	-0.0448952	0.0213851	PSME4;APOE
mitotic cell cycle phase transition (GO:0044772)	2/222	0.746236	0.782584	0.818429	0.857402	-0.067836	0.0198565	DCTN1;DNM2
cellular response to organic cyclic compound (GO:0071407)	1/136	0.80613	0.831409	0.852375	0.881307	-0.086796	0.0187055	RAP1A
positive regulation of protein kinase B signaling (GO:0051897)	1/128	0.786421	0.815777	0.834845	0.868283	-0.0681802	0.0163812	PIK3CD
positive regulation of cell differentiation (GO:0045597)	1/195	0.905182	0.919108	0.935596	0.951862	-0.159982	0.0159372	RAP1A
regulation of protein kinase activity (GO:0045859)	1/148	0.832348	0.855574	0.875259	0.900267	-0.0857093	0.0157281	RAP1A
anterograde trans-synaptic signaling (GO:0098916)	2/241	0.785845	0.815777	0.852053	0.881307	-0.0623305	0.0150214	PPT1;UNC119
positive regulation of macromolecule biosynthetic process (GO:0010557)	1/143	0.821882	0.846464	0.866188	0.893838	-0.0744808	0.01461	GBA
positive regulation of GTPase activity (GO:0043547)	1/193	0.902852	0.917919	0.933756	0.95117	-0.14292	0.0146059	RAP1A
positive regulation of ubiquitin protein ligase activity (GO:1904668)	1/83	0.632079	0.686233	0.689892	0.751574	-0.0286231	0.0131306	PSME4
regulation of stem cell differentiation (GO:2000736)	1/89	0.65779	0.708321	0.714846	0.771333	-0.0264714	0.0110881	PSME4
generation of neurons (GO:0048699)	1/131	0.794035	0.82206	0.841649	0.874211	-0.0216665	0.00499689	UNC119
adenylate cyclase-modulating G-protein coupled receptor signaling pathway (GO:0007188)	1/135	0.803769	0.831051	0.85029	0.881307	-0.0219484	0.00479449	PSAP
regulation of mitotic cell cycle (GO:0007346)	1/166	0.865202	0.884751	0.903135	0.925932	-0.0316409	0.00458136	DCTN1
spermatogenesis (GO:0007283)	1/154	0.844101	0.86653	0.885341	0.909455	-0.0267205	0.00452868	HERC4
ubiquitin-dependent protein catabolic process (GO:0006511)	2/342	0.917652	0.929982	0.953026	0.96583	-0.0315549	0.00271172	UBXN1;PSME4
ion transport (GO:0006811)	1/290	0.970162	0.976325	0.983184	0.990059	-0.0654034	0.00198123	SLC8A1
transcription from RNA polymerase II promoter (GO:0006366)	1/486	0.997302	0.998015	0.998976	0.999916	0.111393	-0.000300979	KLF13
positive regulation of signal transduction (GO:0009967)	2/207	0.710688	0.751489	0.787238	0.827694	0.00156461	-0.000534349	AAK1;CTSH
negative regulation of sequence-specific DNA binding transcription factor activity (GO:0043433)	2/141	0.504102	0.593237	0.590003	0.683661	0.000949825	-0.000650608	PYCARD;TMSB4X
regulation of cell proliferation (GO:0042127)	3/741	0.993905	0.997052	0.998235	0.999916	0.147243	-0.000900219	CSF1R;CTSH;TSPAN31
regulation of transcription, DNA-templated (GO:0006355)	8/1599	0.999047	0.999047	0.999916	0.999916	0.999237	-0.000952795	KLF13;NCF1;PDCD4;TFAM;APOE;CCAR2;DNM2;SNX6
negative regulation of transcription from RNA polymerase II promoter (GO:0000122)	2/566	0.991915	0.996392	0.997048	0.999916	0.170141	-0.00138124	IRF8;SARS
regulation of transcription from RNA polymerase II promoter (GO:0006357)	8/1479	0.997385	0.998015	0.999693	0.999916	0.543044	-0.00142171	RNASEL;KLF13;PDCD4;IRF8;SARS;TFAM;APOE;MAPK3
regulation of cellular macromolecule biosynthetic process (GO:2000112)	2/632	0.996056	0.997946	0.998743	0.999916	0.46481	-0.00183695	TFAM;DNM2
purine ribonucleotide metabolic process (GO:0009150)	1/67	0.553722	0.629193	0.612211	0.699166	0.00661065	-0.00390751	ACLY
regulation of nucleic acid-templated transcription (GO:1903506)	2/608	0.994872	0.997391	0.998283	0.999916	0.979702	-0.00503661	TFAM;DNM2
positive regulation of protein serine/threonine kinase activity (GO:0071902)	2/119	0.417047	0.535483	0.499741	0.631752	0.00578688	-0.00506095	CARD10;CSF1R
protein ubiquitination (GO:0016567)	3/507	0.943824	0.95224	0.973844	0.982528	0.0944101	-0.00545836	HERC4;PSME4;LNPEP
transmembrane transport (GO:0055085)	2/379	0.942985	0.952001	0.969732	0.979627	0.0948686	-0.00556922	ABCA3;PSME4
positive regulation of transcription from RNA polymerase II promoter (GO:0045944)	4/849	0.991989	0.996392	0.997885	0.999916	0.71071	-0.00571652	RNASEL;IRF8;TFAM;MAPK3
positive regulation of transcription, DNA-templated (GO:0045893)	6/1121	0.993206	0.996982	0.998677	0.999916	0.842231	-0.00574196	RNASEL;NCF1;IRF8;TFAM;DNM2;MAPK3
negative regulation of cellular macromolecule biosynthetic process (GO:2000113)	3/513	0.946753	0.954588	0.975499	0.983571	0.126585	-0.00692629	PDCD4;CCAR2;SNX6
regulation of cell cycle (GO:0051726)	1/216	0.926531	0.938379	0.9521	0.96551	0.0955434	-0.00729071	PDCD4
negative regulation of cell proliferation (GO:0008285)	1/364	0.987923	0.993568	0.994128	0.999809	0.615378	-0.00747723	CD300A
cilium organization (GO:0044782)	1/193	0.902852	0.917919	0.933756	0.95117	0.0829218	-0.00847434	UNC119
mitochondrial transport (GO:0006839)	1/136	0.80613	0.831409	0.852375	0.881307	0.041021	-0.00884047	STOML2
DNA metabolic process (GO:0006259)	2/315	0.892878	0.90953	0.935637	0.951862	0.0922939	-0.0104574	PSME4;LONP1
positive regulation of proteasomal protein catabolic process (GO:1901800)	1/74	0.589863	0.653386	0.64833	0.722191	0.0198938	-0.0105013	CLU
DNA repair (GO:0006281)	1/289	0.969795	0.976325	0.982944	0.990059	0.34956	-0.010721	PSME4
protein targeting (GO:0006605)	1/134	0.801379	0.829121	0.848175	0.879835	0.0627375	-0.0138914	NCF1
regulation of mRNA stability (GO:0043488)	1/129	0.78899	0.817371	0.837145	0.870103	0.0626007	-0.0148365	PSME4
positive regulation of plasma membrane bounded cell projection assembly (GO:0120034)	1/70	0.569584	0.640782	0.628122	0.709661	0.0268876	-0.0151337	RAC1
negative regulation of cell migration (GO:0030336)	1/122	0.770342	0.802777	0.820351	0.85828	0.0651253	-0.0169926	ARAP3
protein modification by small protein conjugation (GO:0032446)	3/399	0.858675	0.879213	0.918957	0.93851	0.127999	-0.0195024	HERC4;DCUN1D1;UBA3
chemical synaptic transmission (GO:0007268)	3/290	0.67638	0.72352	0.773273	0.817121	0.0537458	-0.0210146	PPT1;UNC119;APOE
gene expression (GO:0010467)	3/412	0.872946	0.891133	0.928913	0.948066	0.160926	-0.0218669	YTHDC2;SARS;MRRF
regulation of immune response (GO:0050776)	2/252	0.806215	0.831409	0.868837	0.895406	0.105214	-0.0226636	CD300A;NECTIN2
proteasome-mediated ubiquitin-dependent protein catabolic process (GO:0043161)	2/292	0.866507	0.885514	0.916198	0.9369	0.165748	-0.0237492	UBXN1;PSME4
cellular macromolecule biosynthetic process (GO:0034645)	2/368	0.936349	0.946507	0.965476	0.97595	0.380695	-0.0250372	SARS;MRRF
negative regulation of nucleic acid-templated transcription (GO:1903507)	3/445	0.903613	0.918103	0.949369	0.963357	0.259435	-0.0262949	PDCD4;CCAR2;SNX6
positive regulation of cytokine production (GO:0001819)	1/221	0.930863	0.941563	0.955364	0.96758	0.373451	-0.0267552	PYCARD
negative regulation of transcription, DNA-templated (GO:0045892)	5/814	0.968447	0.97584	0.989757	0.996046	0.864059	-0.0277027	PDCD4;IRF8;SARS;CCAR2;SNX6
peptidyl-serine phosphorylation (GO:0018105)	1/146	0.828237	0.851901	0.871707	0.897195	0.154062	-0.0290339	STK38
positive regulation of cellular biosynthetic process (GO:0031328)	1/160	0.855033	0.876616	0.894611	0.917787	0.21276	-0.0333215	CLU
cilium assembly (GO:0060271)	2/289	0.86266	0.882721	0.913291	0.93453	0.228348	-0.0337351	DCTN1;UNC119
intrinsic apoptotic signaling pathway (GO:0097193)	1/102	0.707522	0.748641	0.762268	0.808187	0.105663	-0.0365579	PYCARD
positive regulation of I-kappaB kinase/NF-kappaB signaling (GO:0043123)	2/164	0.585681	0.650574	0.670892	0.739267	0.0686414	-0.0367218	TRADD;CARD9
negative regulation of programmed cell death (GO:0043069)	4/409	0.72335	0.762841	0.825891	0.862936	0.116735	-0.0378061	CSF1R;TNFAIP8;PPT1;CTSH
peptidyl-serine modification (GO:0018209)	1/171	0.873131	0.891133	0.909712	0.931469	0.282748	-0.0383604	STK38
positive regulation of cellular process (GO:0048522)	5/520	0.747838	0.782931	0.854963	0.88283	0.132222	-0.0384196	ACLY;CSF1R;MTMR2;CTSH;TSPAN31
nervous system development (GO:0007399)	5/456	0.638524	0.69039	0.766967	0.812626	0.0940168	-0.0421756	DNM3;DCTN1;GDA;PPT1;TPP1
rRNA metabolic process (GO:0016072)	1/201	0.911845	0.92528	0.940817	0.955904	0.463716	-0.0427943	MARS
negative regulation of cell cycle (GO:0045786)	1/73	0.584884	0.650574	0.643383	0.719209	0.0802277	-0.0430295	PDCD4
retrograde vesicle-mediated transport, Golgi to ER (GO:0006890)	1/81	0.623088	0.678798	0.6811	0.744043	0.0938476	-0.0443962	ARFGAP3
neuron projection morphogenesis (GO:0048812)	2/164	0.585681	0.650574	0.670892	0.739267	0.0839479	-0.0449105	RAC1;DNM2
positive regulation of multicellular organismal process (GO:0051240)	1/203	0.91396	0.926833	0.942462	0.956962	0.500237	-0.0450055	CTSH
negative regulation of growth (GO:0045926)	2/121	0.425288	0.539789	0.508455	0.634667	0.053075	-0.0453785	PPT1;CCAR2
proteasomal protein catabolic process (GO:0010498)	2/238	0.779973	0.811746	0.847148	0.879346	0.18568	-0.0461408	UBXN1;PSME4
cellular response to transforming growth factor beta stimulus (GO:0071560)	1/101	0.703967	0.746374	0.758917	0.806254	0.132349	-0.0464578	PXN
RNA metabolic process (GO:0016070)	1/192	0.901665	0.917891	0.932816	0.95117	0.466133	-0.0482502	YTHDC2
neuron differentiation (GO:0030182)	2/140	0.500327	0.592741	0.586172	0.682217	0.0700397	-0.048502	PPT1;UNC119
chromatin remodeling (GO:0006338)	1/117	0.756025	0.789937	0.807311	0.846875	0.173671	-0.0485723	TFAM
positive regulation of intracellular signal transduction (GO:1902533)	7/480	0.350571	0.488043	0.510712	0.636983	0.0464202	-0.0486574	CSF1R;NCF1;TRADD;CARD9;PDCD4;PIK3CD;LAMTOR2
cellular response to interferon-gamma (GO:0071346)	2/117	0.408748	0.532043	0.490929	0.625106	0.0544802	-0.048741	IRF8;IFI30
transcription, DNA-templated (GO:0006351)	2/357	0.928988	0.940266	0.960651	0.971693	0.661954	-0.0487593	KLF13;TFAM
protein maturation (GO:0051604)	1/84	0.636494	0.688666	0.694197	0.753672	0.116773	-0.0527555	UQCRC2
positive regulation of cell proliferation (GO:0008284)	3/425	0.885932	0.903035	0.93774	0.953389	0.438756	-0.0531402	CSF1R;CTSH;TSPAN31
regulation of G2/M transition of mitotic cell cycle (GO:0010389)	2/150	0.537233	0.614919	0.623297	0.707237	0.0857651	-0.0532879	DCTN1;PSME4
protein polyubiquitination (GO:0000209)	2/284	0.856022	0.877062	0.908236	0.93056	0.34963	-0.0543533	PSME4;LNPEP
positive regulation of nucleic acid-templated transcription (GO:1903508)	3/503	0.941789	0.951399	0.972683	0.981982	0.946164	-0.0567449	NCF1;TFAM;DNM2
negative regulation of cell differentiation (GO:0045596)	1/151	0.838331	0.861164	0.880406	0.904972	0.32941	-0.0580891	PDCD4
positive regulation of homeostatic process (GO:0032846)	1/84	0.636494	0.688666	0.694197	0.753672	0.142869	-0.0645455	PIK3CD
defense response to bacterium (GO:0042742)	2/242	0.787772	0.816643	0.853655	0.882055	0.291802	-0.0696086	PYCARD;ANXA3
negative regulation of gene expression (GO:0010629)	6/619	0.752993	0.787288	0.867048	0.894144	0.249465	-0.0707731	CCR1;PDCD4;CNPY2;DIP2A;CCAR2;SNX6
positive regulation of MAP kinase activity (GO:0043406)	2/178	0.630293	0.685232	0.713525	0.770957	0.154888	-0.0714919	RAP1A;MAPK3
RNA splicing (GO:0008380)	1/107	0.724672	0.763219	0.77834	0.820832	0.232341	-0.0748222	CCAR2
negative regulation of hydrolase activity (GO:0051346)	1/109	0.731248	0.768102	0.784461	0.825639	0.242753	-0.0759821	FKBP15
G-protein coupled receptor signaling pathway, coupled to cyclic nucleotide second messenger (GO:0007187)	1/126	0.78119	0.811945	0.830148	0.865101	0.325671	-0.0804201	CCR1
protein tetramerization (GO:0051262)	1/91	0.665956	0.714201	0.722712	0.777701	0.198691	-0.0807741	ACOT13
regulation of mitotic cell cycle phase transition (GO:1901990)	2/185	0.651163	0.702617	0.733058	0.786756	0.192926	-0.0827645	DCTN1;PSME4
B cell receptor signaling pathway (GO:0050853)	1/105	0.717936	0.757635	0.772045	0.816368	0.271929	-0.0901105	PIK3CD
regulation of cytoskeleton organization (GO:0051493)	1/96	0.685533	0.730252	0.741444	0.792475	0.240098	-0.0906512	MAPK3
regulation of gene expression (GO:0010468)	9/1038	0.877807	0.89533	0.957206	0.968827	0.710401	-0.0925852	CCR1;CTSH;PIK3CD;TFAM;CNPY2;DIP2A;CLU;DNM2;MAPK3
positive regulation of hydrolase activity (GO:0051345)	2/173	0.614801	0.674408	0.698854	0.757172	0.199301	-0.0969515	RAP1A;CTSH
humoral immune response mediated by circulating immunoglobulin (GO:0002455)	2/126	0.44562	0.552751	0.529804	0.650046	0.120678	-0.0975422	C1QA;C1QC
membrane lipid biosynthetic process (GO:0046467)	1/61	0.52023	0.60547	0.578329	0.678191	0.151806	-0.0992028	ALDH3B1
positive regulation of gene expression (GO:0010628)	7/772	0.819941	0.845014	0.917935	0.93807	0.51339	-0.10192	NCF1;CTSH;PIK3CD;TFAM;CLU;DNM2;MAPK3
peptide biosynthetic process (GO:0043043)	2/175	0.621056	0.677983	0.704795	0.762045	0.22283	-0.106142	SARS;MRRF
positive regulation of lymphocyte activation (GO:0051251)	1/105	0.717936	0.757635	0.772045	0.816368	0.322951	-0.107018	PYCARD
phagocytosis (GO:0006909)	1/136	0.80613	0.831409	0.852375	0.881307	0.497541	-0.107225	ANXA3
negative regulation of apoptotic signaling pathway (GO:2001234)	1/66	0.548306	0.623934	0.606759	0.693939	0.196107	-0.117845	CLU
ncRNA processing (GO:0034470)	2/228	0.759376	0.792392	0.829721	0.865101	0.432092	-0.118937	SARS;AARS
Fc-gamma receptor signaling pathway (GO:0038094)	2/135	0.481182	0.581383	0.566626	0.668804	0.167992	-0.122888	RAC1;MAPK3
regulation of hematopoietic progenitor cell differentiation (GO:1901532)	1/78	0.60919	0.670109	0.667446	0.737262	0.251512	-0.124655	PSME4
negative regulation of neuron differentiation (GO:0045665)	1/65	0.542825	0.619477	0.60123	0.689108	0.211192	-0.129031	APOE
phagocytosis, engulfment (GO:0006911)	1/105	0.717936	0.757635	0.772045	0.816368	0.422723	-0.14008	RAC1
complement activation, classical pathway (GO:0006958)	2/124	0.437535	0.549062	0.52134	0.644853	0.170039	-0.140554	C1QA;C1QC
axonogenesis (GO:0007409)	2/224	0.750683	0.785391	0.822266	0.859715	0.51277	-0.147048	PIK3CD;MAPK3
positive regulation of phosphorylation (GO:0042327)	3/209	0.456984	0.563315	0.563076	0.6686	0.262925	-0.205899	CSF1R;RAC1;MAPK3
positive regulation of protein phosphorylation (GO:0001934)	4/413	0.730356	0.767673	0.831518	0.86596	0.673461	-0.211617	CSF1R;RAP1A;RAC1;MAPK3

## Sheet: TEM down
Term	Overlap	P-value	Adjusted P-value	Old P-value	Old Adjusted P-value	Z-score	Combined Score	Genes
protein localization to cytoplasmic stress granule (GO:1903608)	2/8	0.000382885	0.0190075	0.000767209	0.0355474	-2.77584	21.8397	SSB;YBX1
nuclear-transcribed mRNA catabolic process, nonsense-mediated decay (GO:0000184)	5/113	6.63453e-05	0.00609644	0.000135814	0.0134844	-1.99589	19.2017	RPS9;RPS16;RPS8;RPL35A;EIF4G1
peptide biosynthetic process (GO:0043043)	6/175	5.03122e-05	0.00582783	0.000109661	0.0127024	-1.91898	18.9927	EEF1A1;RPS9;RPS16;RPS8;RPL35A;EIF4G1
IRES-dependent viral translational initiation (GO:0075522)	2/11	0.000746628	0.0288281	0.00131906	0.0506779	-2.59578	18.6895	SSB;EIF3B
regulation of translational initiation (GO:0006446)	4/63	9.18838e-05	0.00709547	0.000178507	0.0137847	-1.89478	17.6119	NPM1;EIF1;EIF3B;EIF4G1
viral translation (GO:0019081)	2/14	0.00122636	0.0370573	0.0020129	0.0608246	-2.62639	17.6065	SSB;EIF3B
regulation of translation (GO:0006417)	7/214	1.55959e-05	0.00468292	3.77837e-05	0.011074	-1.58818	17.5788	RBM3;NPM1;CAPRIN1;EEF2;EIF1;EIF3B;EIF4G1
cellular macromolecule biosynthetic process (GO:0034645)	8/368	7.01748e-05	0.00609644	0.000168669	0.0137847	-1.75321	16.7686	EEF1A1;RPS9;RPS16;RPS8;RPL35A;EEF2;PTMA;EIF4G1
gene expression (GO:0010467)	10/412	3.10105e-06	0.00215523	9.40328e-06	0.00653528	-1.25846	15.962	EEF1A1;RBM3;RPS9;RPS16;RPS8;CPSF2;RPL35A;SRSF6;PTMA;EIF4G1
protein targeting to ER (GO:0045047)	4/98	0.000504714	0.0219235	0.000886935	0.0385262	-2.06736	15.6944	RPS9;RPS16;RPS8;RPL35A
positive regulation of cellular protein metabolic process (GO:0032270)	5/92	2.47086e-05	0.00468292	5.35185e-05	0.011074	-1.45245	15.4082	RBM3;NPM1;EEF2;OGT;EIF4G1
ribosomal small subunit export from nucleus (GO:0000056)	1/7	0.0259604	0.191457	0.0331852	0.233421	-4.10772	14.998	NPM1
viral process (GO:0016032)	6/221	0.000181455	0.0126111	0.00037379	0.0248712	-1.68457	14.5117	RPS9;RPS16;SSB;RPS8;RPL35A;EIF3B
SRP-dependent cotranslational protein targeting to membrane (GO:0006614)	4/90	0.000365172	0.0190075	0.000652595	0.0348888	-1.82811	14.4698	RPS9;RPS16;RPS8;RPL35A
positive regulation of microglial cell activation (GO:1903980)	1/7	0.0259604	0.191457	0.0331852	0.233421	-3.89133	14.208	STAP1
mRNA splice site selection (GO:0006376)	2/25	0.0039365	0.0911955	0.00571526	0.132404	-2.45158	13.5755	LUC7L3;SRSF6
positive regulation of cellular amide metabolic process (GO:0034250)	3/62	0.00163423	0.0462506	0.00257371	0.0745303	-2.09786	13.4611	RBM3;NPM1;EEF2
rRNA metabolic process (GO:0016072)	5/201	0.000952139	0.0315113	0.00172344	0.0570377	-1.91657	13.3332	TRIR;RPS9;RPS16;RPS8;RPL35A
negative regulation of epidermal cell differentiation (GO:0045605)	1/8	0.0296143	0.191457	0.0372564	0.233421	-3.68933	12.9846	SRSF6
negative regulation of keratinocyte differentiation (GO:0045617)	1/7	0.0259604	0.191457	0.0331852	0.233421	-3.53985	12.9247	SRSF6
translation (GO:0006412)	7/233	2.69521e-05	0.00468292	6.37355e-05	0.011074	-1.22496	12.8884	EEF1A1;RPS9;RPS16;RPS8;RPL35A;EEF2;EIF4G1
positive regulation of mRNA binding (GO:1902416)	1/8	0.0296143	0.191457	0.0372564	0.233421	-3.65859	12.8764	EIF4G1
histone mRNA metabolic process (GO:0008334)	2/25	0.0039365	0.0911955	0.00571526	0.132404	-2.2804	12.6276	SSB;CPSF2
viral transcription (GO:0019083)	4/114	0.000891199	0.0309692	0.0015235	0.0529417	-1.77035	12.433	RPS9;RPS16;RPS8;RPL35A
regulation of thymocyte apoptotic process (GO:0070243)	1/7	0.0259604	0.191457	0.0331852	0.233421	-3.33706	12.1842	ADAM8
nuclear-transcribed mRNA catabolic process (GO:0000956)	6/175	5.03122e-05	0.00582783	0.000109661	0.0127024	-1.2309	12.1825	EIF4A1;RPS9;RPS16;RPS8;RPL35A;EIF4G1
retinal ganglion cell axon guidance (GO:0031290)	1/7	0.0259604	0.191457	0.0331852	0.233421	-3.32289	12.1325	ALCAM
ncRNA processing (GO:0034470)	5/228	0.00166369	0.0462506	0.00294329	0.0786763	-1.89457	12.1228	RPS9;RPS16;SSB;RPS8;RPL35A
positive regulation of cellular extravasation (GO:0002693)	1/7	0.0259604	0.191457	0.0331852	0.233421	-3.26207	11.9104	ADAM8
regulation of microglial cell activation (GO:1903978)	1/8	0.0296143	0.191457	0.0372564	0.233421	-3.35716	11.8155	STAP1
positive regulation of T cell differentiation in thymus (GO:0033089)	1/7	0.0259604	0.191457	0.0331852	0.233421	-3.22238	11.7655	ADAM8
regulation of response to wounding (GO:1903034)	1/7	0.0259604	0.191457	0.0331852	0.233421	-3.13877	11.4602	SRSF6
positive regulation of translation (GO:0045727)	4/79	0.000221509	0.0128291	0.000407032	0.0248712	-1.35774	11.4254	RBM3;NPM1;RPS9;EEF2
viral gene expression (GO:0019080)	4/111	0.000806659	0.0295067	0.00138544	0.0506779	-1.56764	11.1657	RPS9;RPS16;RPS8;RPL35A
tRNA 3'-end processing (GO:0042780)	1/8	0.0296143	0.191457	0.0372564	0.233421	-3.16443	11.1372	SSB
positive regulation of cellular biosynthetic process (GO:0031328)	4/160	0.0030855	0.0765865	0.00499729	0.12404	-1.86338	10.7723	RBM3;NPM1;PCNA;EEF2
molybdopterin cofactor metabolic process (GO:0043545)	1/8	0.0296143	0.191457	0.0372564	0.233421	-3.05678	10.7583	MOCOS
negative regulation of protein kinase activity by regulation of protein phosphorylation (GO:0044387)	1/8	0.0296143	0.191457	0.0372564	0.233421	-3.04245	10.7079	NPM1
cotranslational protein targeting to membrane (GO:0006613)	4/94	0.000430921	0.019966	0.000763416	0.0355474	-1.36096	10.5469	RPS9;RPS16;RPS8;RPL35A
peptidyl-diphthamide metabolic process (GO:0017182)	1/9	0.0332547	0.191457	0.0413108	0.233421	-3.06622	10.4361	EEF2
regulation of cellular response to stress (GO:0080135)	4/105	0.000654837	0.0267713	0.00113598	0.0464415	-1.42139	10.4204	NPM1;DNAJC7;USP19;EIF4G1
rRNA-containing ribonucleoprotein complex export from nucleus (GO:0071428)	1/8	0.0296143	0.191457	0.0372564	0.233421	-2.95899	10.4142	NPM1
positive regulation of dendritic spine morphogenesis (GO:0061003)	1/8	0.0296143	0.191457	0.0372564	0.233421	-2.93772	10.3393	CAPRIN1
fructose 6-phosphate metabolic process (GO:0006002)	1/7	0.0259604	0.191457	0.0331852	0.233421	-2.8221	10.304	GFPT1
mast cell degranulation (GO:0043303)	1/9	0.0332547	0.191457	0.0413108	0.233421	-3.00873	10.2404	MILR1
ribosome biogenesis (GO:0042254)	6/227	0.000209741	0.0128291	0.000429431	0.0248712	-1.20545	10.2097	NPM1;RPS9;RPS16;RPS8;HEATR3;RPL35A
ribosomal large subunit export from nucleus (GO:0000055)	1/9	0.0332547	0.191457	0.0413108	0.233421	-2.99092	10.1798	NPM1
regulation of phagocytosis, engulfment (GO:0060099)	1/7	0.0259604	0.191457	0.0331852	0.233421	-2.78248	10.1593	STAP1
fatty acid elongation, saturated fatty acid (GO:0019367)	1/8	0.0296143	0.191457	0.0372564	0.233421	-2.8726	10.1101	ELOVL1
protein alkylation (GO:0008213)	2/30	0.00563927	0.118766	0.00796812	0.167813	-1.93833	10.0367	EEF1A1;EEF2
RNA metabolic process (GO:0016070)	4/192	0.00588639	0.120325	0.00928674	0.189832	-1.95401	10.0341	RBM3;EIF4A1;PCNA;DDX21
regulation of chaperone-mediated autophagy (GO:1904714)	1/9	0.0332547	0.191457	0.0413108	0.233421	-2.91805	9.93176	EEF1A1
negative regulation of leukocyte chemotaxis (GO:0002689)	1/10	0.0368816	0.191457	0.0453483	0.233421	-2.95328	9.74594	STAP1
rRNA transport (GO:0051029)	1/7	0.0259604	0.191457	0.0331852	0.233421	-2.64006	9.63935	NPM1
regulation of histone H3-K27 methylation (GO:0061085)	1/7	0.0259604	0.191457	0.0331852	0.233421	-2.61481	9.54714	OGT
amino sugar metabolic process (GO:0006040)	1/11	0.0404951	0.191457	0.0493692	0.233421	-2.96797	9.51702	GFPT1
negative regulation of proteasomal protein catabolic process (GO:1901799)	2/29	0.00527606	0.118286	0.00749027	0.167813	-1.8111	9.49845	GABARAPL2;OGT
fatty acid elongation, unsaturated fatty acid (GO:0019368)	1/8	0.0296143	0.191457	0.0372564	0.233421	-2.68752	9.45874	ELOVL1
fatty acid elongation, polyunsaturated fatty acid (GO:0034626)	1/8	0.0296143	0.191457	0.0372564	0.233421	-2.68114	9.43628	ELOVL1
negative regulation of monooxygenase activity (GO:0032769)	1/9	0.0332547	0.191457	0.0413108	0.233421	-2.76528	9.41178	NOSIP
negative regulation of striated muscle tissue development (GO:0045843)	1/8	0.0296143	0.191457	0.0372564	0.233421	-2.66216	9.36946	USP19
mast cell mediated immunity (GO:0002448)	1/10	0.0368816	0.191457	0.0453483	0.233421	-2.82433	9.32042	MILR1
chromatin remodeling (GO:0006338)	3/117	0.00970531	0.167317	0.0140576	0.233421	-2.00838	9.30903	NPM1;CHRAC1;RIOX2
regulation of endodeoxyribonuclease activity (GO:0032071)	1/9	0.0332547	0.191457	0.0413108	0.233421	-2.70913	9.22067	NPM1
endoplasmic reticulum membrane organization (GO:0090158)	1/7	0.0259604	0.191457	0.0331852	0.233421	-2.52105	9.20481	RTN4
regulation of oxidative stress-induced neuron intrinsic apoptotic signaling pathway (GO:1903376)	1/7	0.0259604	0.191457	0.0331852	0.233421	-2.48616	9.07744	NONO
ribosomal subunit export from nucleus (GO:0000054)	1/13	0.0476821	0.195468	0.0573609	0.233421	-2.97353	9.04905	NPM1
regulation of ERAD pathway (GO:1904292)	1/9	0.0332547	0.191457	0.0413108	0.233421	-2.65512	9.03687	USP19
positive regulation of macromolecule biosynthetic process (GO:0010557)	4/143	0.00205572	0.0529159	0.00338641	0.0871688	-1.45037	8.9736	RBM3;NPM1;PCNA;EEF2
negative regulation of centrosome duplication (GO:0010826)	1/11	0.0404951	0.191457	0.0493692	0.233421	-2.79687	8.96836	NPM1
mast cell activation involved in immune response (GO:0002279)	1/9	0.0332547	0.191457	0.0413108	0.233421	-2.63089	8.95437	MILR1
ribosomal small subunit biogenesis (GO:0042274)	2/45	0.0123779	0.19117	0.0166797	0.233421	-2.02345	8.88669	NPM1;RPS16
regulation of cellular response to insulin stimulus (GO:1900076)	1/8	0.0296143	0.191457	0.0372564	0.233421	-2.51081	8.8368	OGT
positive regulation of bone resorption (GO:0045780)	1/11	0.0404951	0.191457	0.0493692	0.233421	-2.74485	8.80158	ADAM8
regulation of cytoplasmic translational elongation (GO:1900247)	1/11	0.0404951	0.191457	0.0493692	0.233421	-2.74038	8.78724	EEF2
ribosomal large subunit biogenesis (GO:0042273)	3/64	0.00179071	0.047867	0.00280589	0.0780038	-1.38837	8.78161	NPM1;HEATR3;RPL35A
endothelial tube morphogenesis (GO:0061154)	1/11	0.0404951	0.191457	0.0493692	0.233421	-2.71341	8.70074	RHOB
nuclear-transcribed mRNA poly(A) tail shortening (GO:0000289)	2/30	0.00563927	0.118766	0.00796812	0.167813	-1.66329	8.61253	EIF4A1;EIF4G1
protein hexamerization (GO:0034214)	1/10	0.0368816	0.191457	0.0453483	0.233421	-2.58789	8.54016	MAT2A
nuclear pore complex assembly (GO:0051292)	1/11	0.0404951	0.191457	0.0493692	0.233421	-2.6533	8.50799	RTN4
mesodermal cell differentiation (GO:0048333)	1/10	0.0368816	0.191457	0.0453483	0.233421	-2.56361	8.46001	ITGB1
maturation of SSU-rRNA from tricistronic rRNA transcript (SSU-rRNA, 5.8S rRNA, LSU-rRNA) (GO:0000462)	2/36	0.00804966	0.155403	0.0111126	0.215932	-1.73837	8.38263	RPS16;RPS8
RNA export from nucleus (GO:0006405)	4/120	0.00107871	0.0340773	0.00182791	0.0577455	-1.22318	8.35674	NPM1;SSB;CPSF2;SRSF6
neuron projection extension involved in neuron projection guidance (GO:1902284)	1/9	0.0332547	0.191457	0.0413108	0.233421	-2.43064	8.27282	ALCAM
axon extension involved in axon guidance (GO:0048846)	1/9	0.0332547	0.191457	0.0413108	0.233421	-2.40358	8.18072	ALCAM
internal protein amino acid acetylation (GO:0006475)	1/12	0.0440953	0.195468	0.0533734	0.233421	-2.60487	8.13084	HAT1
regulation of T cell differentiation in thymus (GO:0033081)	1/13	0.0476821	0.195468	0.0573609	0.233421	-2.65989	8.09458	ADAM8
protein methylation (GO:0006479)	2/47	0.0134507	0.191457	0.0180484	0.233421	-1.86602	8.04015	EEF1A1;EEF2
regulation of Rac protein signal transduction (GO:0035020)	1/10	0.0368816	0.191457	0.0453483	0.233421	-2.41112	7.9568	OGT
positive regulation of bone remodeling (GO:0046852)	1/11	0.0404951	0.191457	0.0493692	0.233421	-2.4739	7.93273	ADAM8
regulation of skeletal muscle tissue development (GO:0048641)	1/13	0.0476821	0.195468	0.0573609	0.233421	-2.60538	7.9287	USP19
positive regulation of T cell apoptotic process (GO:0070234)	1/11	0.0404951	0.191457	0.0493692	0.233421	-2.47022	7.92096	ADAM8
neuron projection fasciculation (GO:0106030)	1/11	0.0404951	0.191457	0.0493692	0.233421	-2.43977	7.8233	RTN4
rRNA processing (GO:0006364)	4/203	0.00714512	0.141882	0.011185	0.215932	-1.58283	7.82128	RPS9;RPS16;RPS8;RPL35A
peptidyl-amino acid modification (GO:0018193)	1/10	0.0368816	0.191457	0.0453483	0.233421	-2.36582	7.80729	METAP2
regulation of mast cell activation (GO:0033003)	1/10	0.0368816	0.191457	0.0453483	0.233421	-2.36151	7.79309	MILR1
histone mRNA catabolic process (GO:0071044)	1/12	0.0440953	0.195468	0.0533734	0.233421	-2.49264	7.78053	SSB
positive regulation of protein maturation (GO:1903319)	1/10	0.0368816	0.191457	0.0453483	0.233421	-2.35302	7.76505	ADAM8
positive regulation of cell cycle phase transition (GO:1901989)	1/12	0.0440953	0.195468	0.0533734	0.233421	-2.48098	7.74414	NPM1
negative regulation of leukocyte activation (GO:0002695)	1/12	0.0440953	0.195468	0.0533734	0.233421	-2.45908	7.67577	MILR1
Notch receptor processing, ligand-dependent (GO:0035333)	1/14	0.0512556	0.195468	0.061332	0.233421	-2.58181	7.67037	YBX1
nucleosome assembly (GO:0006334)	2/61	0.0220174	0.191457	0.0288716	0.233421	-2.00435	7.64843	NPM1;HAT1
tRNA 5'-leader removal (GO:0001682)	1/13	0.0476821	0.195468	0.0573609	0.233421	-2.4874	7.56966	SSB
alpha-linolenic acid metabolic process (GO:0036109)	1/14	0.0512556	0.195468	0.061332	0.233421	-2.48656	7.38741	ELOVL1
regulation of proteasomal protein catabolic process (GO:0061136)	2/40	0.00987051	0.167317	0.0134646	0.233421	-1.59236	7.35384	GABARAPL2;USP19
cytoskeletal anchoring at plasma membrane (GO:0007016)	1/10	0.0368816	0.191457	0.0453483	0.233421	-2.2266	7.34787	TLN1
positive regulation of cell cycle G2/M phase transition (GO:1902751)	1/18	0.0654178	0.19682	0.0770524	0.233421	-2.69389	7.34613	NPM1
regulation of cellular protein metabolic process (GO:0032268)	2/51	0.0157127	0.191457	0.0209232	0.233421	-1.76353	7.32446	RBM3;EIF4G1
cytoplasmic translational initiation (GO:0002183)	1/13	0.0476821	0.195468	0.0573609	0.233421	-2.39856	7.29929	EIF4G1
regulation of cellular amide metabolic process (GO:0034248)	2/39	0.00939963	0.167317	0.0128579	0.233421	-1.54163	7.1949	EEF1A1;RBM3
alternative mRNA splicing, via spliceosome (GO:0000380)	1/13	0.0476821	0.195468	0.0573609	0.233421	-2.35611	7.17013	SRSF6
UDP-N-acetylglucosamine biosynthetic process (GO:0006048)	1/12	0.0440953	0.195468	0.0533734	0.233421	-2.28536	7.13354	GFPT1
positive regulation of proteolysis (GO:0045862)	2/53	0.0169006	0.191457	0.0224275	0.233421	-1.74468	7.11902	ADAM8;OGT
acetyl-CoA metabolic process (GO:0006084)	1/15	0.0548159	0.195468	0.0652866	0.233421	-2.44033	7.08618	HMGCS1
positive regulation of G1/S transition of mitotic cell cycle (GO:1900087)	1/17	0.0618969	0.195468	0.0731467	0.233421	-2.53051	7.0406	EIF4G1
histone H3-K4 trimethylation (GO:0080182)	1/10	0.0368816	0.191457	0.0453483	0.233421	-2.1289	7.02545	OGT
nucleotide-sugar metabolic process (GO:0009225)	1/14	0.0512556	0.195468	0.061332	0.233421	-2.35054	6.9833	GFPT1
positive regulation of nuclease activity (GO:0032075)	1/11	0.0404951	0.191457	0.0493692	0.233421	-2.17328	6.96878	PCNA
RNA secondary structure unwinding (GO:0010501)	2/47	0.0134507	0.191457	0.0180484	0.233421	-1.61584	6.9622	EIF4A1;DDX21
negative regulation of peptidyl-threonine phosphorylation (GO:0010801)	1/16	0.058363	0.195468	0.0692248	0.233421	-2.43655	6.92241	EIF4G1
cellular response to UV (GO:0034644)	2/68	0.0269517	0.191457	0.0350414	0.233421	-1.9126	6.91159	NPM1;PCNA
UDP-N-acetylglucosamine metabolic process (GO:0006047)	1/13	0.0476821	0.195468	0.0573609	0.233421	-2.26964	6.90698	GFPT1
cellular response to low-density lipoprotein particle stimulus (GO:0071404)	1/14	0.0512556	0.195468	0.061332	0.233421	-2.32181	6.89793	ITGB1
regulation of long-term neuronal synaptic plasticity (GO:0048169)	1/12	0.0440953	0.195468	0.0533734	0.233421	-2.20981	6.89772	NPTN
amino sugar biosynthetic process (GO:0046349)	1/13	0.0476821	0.195468	0.0573609	0.233421	-2.25815	6.87199	GFPT1
mRNA splicing, via spliceosome (GO:0000398)	4/262	0.0169329	0.191457	0.0255862	0.233421	-1.68444	6.86997	NONO;CPSF2;YBX1;SRSF6
regulation of response to stress (GO:0080134)	1/11	0.0404951	0.191457	0.0493692	0.233421	-2.14003	6.86216	EIF4G1
regulation of catabolic process (GO:0009894)	1/13	0.0476821	0.195468	0.0573609	0.233421	-2.25236	6.85439	ITGB1
regulation of centriole replication (GO:0046599)	1/16	0.058363	0.195468	0.0692248	0.233421	-2.40911	6.84445	NPM1
regulation of macrophage chemotaxis (GO:0010758)	1/16	0.058363	0.195468	0.0692248	0.233421	-2.40604	6.83574	STAP1
morphogenesis of an endothelium (GO:0003159)	1/7	0.0259604	0.191457	0.0331852	0.233421	-1.85291	6.76531	RHOB
endoplasmic reticulum tubular network organization (GO:0071786)	1/14	0.0512556	0.195468	0.061332	0.233421	-2.26518	6.72968	RTN4
maturation of SSU-rRNA (GO:0030490)	2/47	0.0134507	0.191457	0.0180484	0.233421	-1.55211	6.6876	RPS16;RPS8
DNA replication-independent nucleosome assembly (GO:0006336)	2/40	0.00987051	0.167317	0.0134646	0.233421	-1.43781	6.6401	NPM1;HAT1
spliceosomal complex assembly (GO:0000245)	2/42	0.0108431	0.179428	0.0147146	0.233421	-1.45038	6.56185	LUC7L3;SRSF6
nuclear-transcribed mRNA catabolic process, deadenylation-dependent decay (GO:0000288)	2/64	0.0240814	0.191457	0.0314572	0.233421	-1.74916	6.51793	EIF4A1;EIF4G1
histone H4-K16 acetylation (GO:0043984)	1/15	0.0548159	0.195468	0.0652866	0.233421	-2.23847	6.50001	OGT
N-terminal protein amino acid modification (GO:0031365)	1/18	0.0654178	0.19682	0.0770524	0.233421	-2.38082	6.49241	METAP2
axonal fasciculation (GO:0007413)	1/13	0.0476821	0.195468	0.0573609	0.233421	-2.11968	6.4506	RTN4
cellular response to nitrogen levels (GO:0043562)	1/14	0.0512556	0.195468	0.061332	0.233421	-2.16633	6.43601	GABARAPL2
regulation of B cell receptor signaling pathway (GO:0050855)	1/18	0.0654178	0.19682	0.0770524	0.233421	-2.35897	6.43283	STAP1
DNA methylation (GO:0006306)	1/19	0.0689256	0.197133	0.0809418	0.233421	-2.39352	6.40201	GATAD2A
peptidyl-arginine modification (GO:0018195)	1/13	0.0476821	0.195468	0.0573609	0.233421	-2.10058	6.39248	RIOX2
negative regulation of oxidative stress-induced neuron death (GO:1903204)	1/11	0.0404951	0.191457	0.0493692	0.233421	-1.99031	6.38208	NONO
negative regulation of mRNA splicing, via spliceosome (GO:0048025)	1/14	0.0512556	0.195468	0.061332	0.233421	-2.13845	6.35318	SRSF6
DNA replication-dependent nucleosome assembly (GO:0006335)	1/11	0.0404951	0.191457	0.0493692	0.233421	-1.97566	6.33511	HAT1
positive regulation of macrophage activation (GO:0043032)	1/18	0.0654178	0.19682	0.0770524	0.233421	-2.31483	6.31245	STAP1
pore complex assembly (GO:0046931)	1/15	0.0548159	0.195468	0.0652866	0.233421	-2.17261	6.30877	RTN4
DNA replication-independent nucleosome organization (GO:0034724)	1/14	0.0512556	0.195468	0.061332	0.233421	-2.11694	6.28927	HAT1
DNA strand elongation involved in DNA replication (GO:0006271)	1/17	0.0618969	0.195468	0.0731467	0.233421	-2.25673	6.27886	PCNA
regulation of protein localization to plasma membrane (GO:1903076)	2/68	0.0269517	0.191457	0.0350414	0.233421	-1.72929	6.24914	ITGB1;NUMB
regulation of energy homeostasis (GO:2000505)	1/17	0.0618969	0.195468	0.0731467	0.233421	-2.23131	6.20815	EIF4G1
DNA methylation or demethylation (GO:0044728)	1/17	0.0618969	0.195468	0.0731467	0.233421	-2.22479	6.19001	GATAD2A
cellular response to light stimulus (GO:0071482)	2/67	0.0262217	0.191457	0.034131	0.233421	-1.68956	6.15199	NPM1;PCNA
Notch receptor processing (GO:0007220)	1/17	0.0618969	0.195468	0.0731467	0.233421	-2.20947	6.14738	YBX1
molybdopterin cofactor biosynthetic process (GO:0032324)	1/8	0.0296143	0.191457	0.0372564	0.233421	-1.72159	6.05912	MOCOS
DNA alkylation (GO:0006305)	1/17	0.0618969	0.195468	0.0731467	0.233421	-2.1626	6.01696	GATAD2A
regulation of mammary gland epithelial cell proliferation (GO:0033599)	1/11	0.0404951	0.191457	0.0493692	0.233421	-1.86214	5.97109	RTN4
regulation of keratinocyte proliferation (GO:0010837)	1/19	0.0689256	0.197133	0.0809418	0.233421	-2.22563	5.95295	SRSF6
positive regulation of antigen receptor-mediated signaling pathway (GO:0050857)	1/17	0.0618969	0.195468	0.0731467	0.233421	-2.12863	5.92246	STAP1
endoplasmic reticulum calcium ion homeostasis (GO:0032469)	1/19	0.0689256	0.197133	0.0809418	0.233421	-2.21363	5.92086	SELENOK
linoleic acid metabolic process (GO:0043651)	1/17	0.0618969	0.195468	0.0731467	0.233421	-2.12226	5.90473	ELOVL1
peptidyl-diphthamide biosynthetic process from peptidyl-histidine (GO:0017183)	1/9	0.0332547	0.191457	0.0413108	0.233421	-1.71395	5.83353	EEF2
positive regulation of homeostatic process (GO:0032846)	2/84	0.0396982	0.191457	0.0508267	0.233421	-1.80094	5.81065	ADAM8;EIF4G1
fatty acid elongation, monounsaturated fatty acid (GO:0034625)	1/8	0.0296143	0.191457	0.0372564	0.233421	-1.6504	5.80857	ELOVL1
protein maturation (GO:0051604)	2/84	0.0396982	0.191457	0.0508267	0.233421	-1.79607	5.79494	OGT;METAP2
leukocyte tethering or rolling (GO:0050901)	1/17	0.0618969	0.195468	0.0731467	0.233421	-2.06805	5.75391	ITGB1
positive regulation of protein processing (GO:0010954)	1/18	0.0654178	0.19682	0.0770524	0.233421	-2.10263	5.7338	ADAM8
very long-chain fatty acid biosynthetic process (GO:0042761)	1/14	0.0512556	0.195468	0.061332	0.233421	-1.92795	5.72782	ELOVL1
positive regulation of membrane protein ectodomain proteolysis (GO:0051044)	1/16	0.058363	0.195468	0.0692248	0.233421	-1.98446	5.638	ADAM8
chloride ion homeostasis (GO:0055064)	1/11	0.0404951	0.191457	0.0493692	0.233421	-1.75599	5.63071	SLC12A4
negative regulation of anoikis (GO:2000811)	1/16	0.058363	0.195468	0.0692248	0.233421	-1.97531	5.612	ITGB1
tRNA metabolic process (GO:0006399)	1/19	0.0689256	0.197133	0.0809418	0.233421	-2.09813	5.61194	SSB
IRE1-mediated unfolded protein response (GO:0036498)	2/58	0.0200314	0.191457	0.0263768	0.233421	-1.41859	5.54733	GFPT1;TLN1
nuclear pore organization (GO:0006999)	1/16	0.058363	0.195468	0.0692248	0.233421	-1.95231	5.54664	RTN4
regulation of ruffle assembly (GO:1900027)	1/22	0.0793714	0.205833	0.0925137	0.243549	-2.17547	5.5118	STAP1
error-prone translesion synthesis (GO:0042276)	1/21	0.0759024	0.199819	0.0886724	0.237943	-2.13199	5.49694	PCNA
positive regulation of actin cytoskeleton reorganization (GO:2000251)	1/19	0.0689256	0.197133	0.0809418	0.233421	-2.04244	5.46297	STAP1
RNA splicing, via transesterification reactions with bulged adenosine as nucleophile (GO:0000377)	4/237	0.0121247	0.19117	0.018577	0.233421	-1.23369	5.44367	NONO;CPSF2;YBX1;SRSF6
histone H4-K5 acetylation (GO:0043981)	1/16	0.058363	0.195468	0.0692248	0.233421	-1.91347	5.43632	OGT
mRNA processing (GO:0006397)	4/284	0.0220323	0.191457	0.0329186	0.233421	-1.41902	5.41393	NONO;CPSF2;YBX1;SRSF6
positive regulation of acute inflammatory response (GO:0002675)	1/16	0.058363	0.195468	0.0692248	0.233421	-1.89862	5.39412	ADAM8
fatty acid elongation (GO:0030497)	1/13	0.0476821	0.195468	0.0573609	0.233421	-1.76124	5.35981	ELOVL1
establishment or maintenance of actin cytoskeleton polarity (GO:0030950)	1/15	0.0548159	0.195468	0.0652866	0.233421	-1.84523	5.35815	RHOB
cellular response to dsRNA (GO:0071359)	1/17	0.0618969	0.195468	0.0731467	0.233421	-1.91843	5.33762	NPM1
leukocyte adhesion to vascular endothelial cell (GO:0061756)	1/17	0.0618969	0.195468	0.0731467	0.233421	-1.91571	5.33005	ITGB1
cellular protein metabolic process (GO:0044267)	6/485	0.00969693	0.167317	0.0168822	0.233421	-1.14884	5.32594	EEF1A1;RPS9;RPS16;RPS8;RPL35A;EIF4G1
regulation of bone resorption (GO:0045124)	1/23	0.0828276	0.210861	0.096339	0.247493	-2.13204	5.3109	ADAM8
cellular response to nitrogen starvation (GO:0006995)	1/14	0.0512556	0.195468	0.061332	0.233421	-1.77479	5.27279	GABARAPL2
membrane lipid metabolic process (GO:0006643)	1/19	0.0689256	0.197133	0.0809418	0.233421	-1.95671	5.23366	SERINC1
histone H4 acetylation (GO:0043967)	2/48	0.0140018	0.191457	0.0187501	0.233421	-1.22592	5.23294	HAT1;OGT
error-free translesion synthesis (GO:0070987)	1/20	0.0724205	0.198942	0.0848151	0.235786	-1.98365	5.20761	PCNA
positive regulation of protein kinase B signaling (GO:0051897)	3/128	0.0123698	0.19117	0.0177426	0.233421	-1.18406	5.20098	ITGB1;ADAM8;RTN4
mesoderm formation (GO:0001707)	1/21	0.0759024	0.199819	0.0886724	0.237943	-2.01361	5.1917	ITGB1
regulation of anoikis (GO:2000209)	1/21	0.0759024	0.199819	0.0886724	0.237943	-1.98434	5.11623	ITGB1
rRNA catabolic process (GO:0016075)	1/18	0.0654178	0.19682	0.0770524	0.233421	-1.87007	5.09961	TRIR
negative regulation of proteolysis involved in cellular protein catabolic process (GO:1903051)	1/20	0.0724205	0.198942	0.0848151	0.235786	-1.94208	5.09848	GABARAPL2
positive regulation of vasculature development (GO:1904018)	2/105	0.0591535	0.195468	0.0746067	0.233421	-1.79285	5.06949	ITGB1;RHOB
positive regulation of cell cycle arrest (GO:0071158)	2/83	0.0388455	0.191457	0.0497764	0.233421	-1.55989	5.06679	NPM1;PCNA
transcription, DNA-templated (GO:0006351)	4/357	0.0451664	0.195468	0.0652914	0.233421	-1.63201	5.05498	BTF3;DDX21;YBX1;PTMA
DNA replication-dependent nucleosome organization (GO:0034723)	1/11	0.0404951	0.191457	0.0493692	0.233421	-1.5753	5.05131	HAT1
negative regulation of protein localization to plasma membrane (GO:1903077)	1/20	0.0724205	0.198942	0.0848151	0.235786	-1.92258	5.04729	NUMB
axon extension (GO:0048675)	1/21	0.0759024	0.199819	0.0886724	0.237943	-1.95566	5.04228	ALCAM
negative regulation of phosphate metabolic process (GO:0045936)	1/20	0.0724205	0.198942	0.0848151	0.235786	-1.91421	5.02532	STAP1
macromolecule biosynthetic process (GO:0009059)	1/20	0.0724205	0.198942	0.0848151	0.235786	-1.91198	5.01946	EIF4G1
long-chain fatty-acyl-CoA biosynthetic process (GO:0035338)	1/19	0.0689256	0.197133	0.0809418	0.233421	-1.87657	5.01931	ELOVL1
negative regulation of RNA splicing (GO:0033119)	1/19	0.0689256	0.197133	0.0809418	0.233421	-1.87528	5.01585	SRSF6
homophilic cell adhesion via plasma membrane adhesion molecules (GO:0007156)	2/65	0.0247865	0.191457	0.0323388	0.233421	-1.35612	5.01421	ITGB1;NPTN
nucleotide-sugar biosynthetic process (GO:0009226)	1/20	0.0724205	0.198942	0.0848151	0.235786	-1.89976	4.98738	GFPT1
apoptotic process (GO:0006915)	3/232	0.0566223	0.195468	0.0763904	0.233421	-1.73231	4.97406	OGT;RTN4;RHOB
ncRNA catabolic process (GO:0034661)	1/23	0.0828276	0.210861	0.096339	0.247493	-1.98907	4.95475	TRIR
membrane protein intracellular domain proteolysis (GO:0031293)	1/25	0.0897015	0.21205	0.103942	0.247493	-2.04076	4.92081	YBX1
negative regulation of protein localization to cell periphery (GO:1904376)	1/20	0.0724205	0.198942	0.0848151	0.235786	-1.86976	4.90862	NUMB
positive regulation of multicellular organismal process (GO:0051240)	3/203	0.0408434	0.191798	0.0558662	0.233421	-1.53114	4.8966	SRSF6;RTN4;EIF4G1
DNA ligation (GO:0006266)	1/19	0.0689256	0.197133	0.0809418	0.233421	-1.81476	4.85398	PCNA
nuclear transport (GO:0051169)	1/23	0.0828276	0.210861	0.096339	0.247493	-1.94259	4.83897	NPM1
RNA 3'-end processing (GO:0031123)	2/62	0.0226968	0.191457	0.0297235	0.233421	-1.27754	4.83618	CPSF2;SRSF6
positive regulation of dendritic spine development (GO:0060999)	1/21	0.0759024	0.199819	0.0886724	0.237943	-1.86131	4.79903	CAPRIN1
protein localization to organelle (GO:0033365)	2/98	0.0523552	0.195468	0.0663337	0.233421	-1.61991	4.77825	SSB;YBX1
peptidyl-lysine trimethylation (GO:0018023)	1/18	0.0654178	0.19682	0.0770524	0.233421	-1.75021	4.77276	OGT
histone H4-K8 acetylation (GO:0043982)	1/16	0.058363	0.195468	0.0692248	0.233421	-1.67914	4.77057	OGT
DNA packaging (GO:0006323)	1/18	0.0654178	0.19682	0.0770524	0.233421	-1.74554	4.76001	HAT1
positive regulation of neurogenesis (GO:0050769)	2/70	0.0284362	0.191457	0.0368903	0.233421	-1.33005	4.7351	NPTN;NUMB
peptidyl-methionine modification (GO:0018206)	1/13	0.0476821	0.195468	0.0573609	0.233421	-1.55103	4.72008	METAP2
protein stabilization (GO:0050821)	3/153	0.019849	0.191457	0.0279431	0.233421	-1.19918	4.70032	HYPK;RTN4;USP19
cell-cell adhesion via plasma-membrane adhesion molecules (GO:0098742)	3/143	0.0166171	0.191457	0.0235576	0.233421	-1.14652	4.69765	ITGB1;ALCAM;NPTN
ribonucleoprotein complex assembly (GO:0022618)	3/157	0.0212321	0.191457	0.0298111	0.233421	-1.20853	4.65556	NPM1;LUC7L3;SRSF6
negative regulation of neuron apoptotic process (GO:0043524)	2/64	0.0240814	0.191457	0.0314572	0.233421	-1.24895	4.65397	NONO;ADAM8
DNA damage response, signal transduction by p53 class mediator resulting in cell cycle arrest (GO:0006977)	2/63	0.0233848	0.191457	0.0305854	0.233421	-1.2391	4.65363	NPM1;PCNA
termination of RNA polymerase II transcription (GO:0006369)	2/69	0.0276899	0.191457	0.0359612	0.233421	-1.29204	4.63415	CPSF2;SRSF6
heterocycle biosynthetic process (GO:0018130)	1/18	0.0654178	0.19682	0.0770524	0.233421	-1.68967	4.60766	MOCOS
signal transduction involved in mitotic G1 DNA damage checkpoint (GO:0072431)	2/64	0.0240814	0.191457	0.0314572	0.233421	-1.2356	4.60423	NPM1;PCNA
regulation of protein kinase B signaling (GO:0051896)	3/164	0.0237771	0.191457	0.033236	0.233421	-1.23127	4.60377	ITGB1;ADAM8;RTN4
mRNA 3'-end processing (GO:0031124)	2/75	0.0322871	0.191457	0.0416726	0.233421	-1.34096	4.60365	CPSF2;SRSF6
energy reserve metabolic process (GO:0006112)	1/22	0.0793714	0.205833	0.0925137	0.243549	-1.80854	4.58215	GFPT1
ncRNA 3'-end processing (GO:0043628)	1/26	0.0931194	0.213591	0.10772	0.247493	-1.92224	4.56316	SSB
positive regulation of gene silencing by miRNA (GO:2000637)	1/21	0.0759024	0.199819	0.0886724	0.237943	-1.75521	4.52548	EIF4G1
regulation of gluconeogenesis (GO:0006111)	1/20	0.0724205	0.198942	0.0848151	0.235786	-1.7201	4.51571	OGT
positive regulation of epithelial cell migration (GO:0010634)	2/75	0.0322871	0.191457	0.0416726	0.233421	-1.31426	4.51198	RTN4;RHOB
hematopoietic progenitor cell differentiation (GO:0002244)	1/23	0.0828276	0.210861	0.096339	0.247493	-1.79635	4.47469	PRRC2C
negative regulation of cell death (GO:0060548)	2/82	0.0379999	0.191457	0.0487342	0.233421	-1.36823	4.47435	SRSF6;EIF4G1
RNA splicing (GO:0008380)	2/107	0.0611494	0.195468	0.0770288	0.233421	-1.59831	4.46637	NONO;LUC7L3
negative regulation of developmental growth (GO:0048640)	1/25	0.0897015	0.21205	0.103942	0.247493	-1.84686	4.45326	RTN4
regulation of centrosome cycle (GO:0046605)	1/27	0.0965246	0.217807	0.111482	0.251559	-1.89068	4.42033	NPM1
mRNA metabolic process (GO:0016071)	2/98	0.0523552	0.195468	0.0663337	0.233421	-1.49148	4.39943	SSB;NONO
mRNA-containing ribonucleoprotein complex export from nucleus (GO:0071427)	2/101	0.0552324	0.195468	0.0698395	0.233421	-1.50715	4.36503	CPSF2;SRSF6
intrinsic apoptotic signaling pathway in response to endoplasmic reticulum stress (GO:0070059)	1/25	0.0897015	0.21205	0.103942	0.247493	-1.79349	4.32458	SELENOK
DNA damage response, signal transduction by p53 class mediator (GO:0030330)	2/83	0.0388455	0.191457	0.0497764	0.233421	-1.31933	4.28541	NPM1;PCNA
regulation of rhodopsin mediated signaling pathway (GO:0022400)	1/27	0.0965246	0.217807	0.111482	0.251559	-1.82089	4.25716	METAP2
regulation of centrosome duplication (GO:0010824)	1/26	0.0931194	0.213591	0.10772	0.247493	-1.79001	4.24925	NPM1
potassium ion homeostasis (GO:0055075)	1/26	0.0931194	0.213591	0.10772	0.247493	-1.78622	4.24027	SLC12A4
regulation of dendritic spine morphogenesis (GO:0061001)	1/24	0.0862709	0.211121	0.100149	0.247493	-1.72787	4.23374	CAPRIN1
positive regulation of neutrophil migration (GO:1902624)	1/26	0.0931194	0.213591	0.10772	0.247493	-1.76829	4.19769	ADAM8
negative regulation of axon extension (GO:0030517)	1/24	0.0862709	0.211121	0.100149	0.247493	-1.71222	4.19539	RTN4
positive regulation of leukocyte mediated cytotoxicity (GO:0001912)	1/26	0.0931194	0.213591	0.10772	0.247493	-1.76699	4.19462	STAP1
monovalent inorganic anion homeostasis (GO:0055083)	1/16	0.058363	0.195468	0.0692248	0.233421	-1.47456	4.18934	SLC12A4
negative regulation of mRNA processing (GO:0050686)	1/16	0.058363	0.195468	0.0692248	0.233421	-1.47269	4.18403	SRSF6
chaperone mediated protein folding requiring cofactor (GO:0051085)	1/25	0.0897015	0.21205	0.103942	0.247493	-1.73519	4.184	DNAJC7
negative regulation of neuron death (GO:1901215)	2/84	0.0396982	0.191457	0.0508267	0.233421	-1.28642	4.15057	ADAM8;EIF4G1
neuron projection extension (GO:1990138)	1/29	0.103297	0.228636	0.11896	0.263304	-1.8277	4.14914	ALCAM
regulation of monooxygenase activity (GO:0032768)	1/24	0.0862709	0.211121	0.100149	0.247493	-1.69282	4.14785	NOSIP
positive regulation of histone methylation (GO:0031062)	1/25	0.0897015	0.21205	0.103942	0.247493	-1.71945	4.14606	OGT
positive regulation of microtubule polymerization (GO:0031116)	1/25	0.0897015	0.21205	0.103942	0.247493	-1.7191	4.1452	CLIP1
regulation of membrane protein ectodomain proteolysis (GO:0051043)	1/23	0.0828276	0.210861	0.096339	0.247493	-1.66135	4.13841	ADAM8
cellular response to hydrogen peroxide (GO:0070301)	1/29	0.103297	0.228636	0.11896	0.263304	-1.81513	4.12061	RHOB
long-term synaptic potentiation (GO:0060291)	1/22	0.0793714	0.205833	0.0925137	0.243549	-1.61346	4.0879	NPTN
positive regulation of dendrite morphogenesis (GO:0050775)	1/17	0.0618969	0.195468	0.0731467	0.233421	-1.46879	4.0866	CAPRIN1
negative regulation of protein localization to membrane (GO:1905476)	1/25	0.0897015	0.21205	0.103942	0.247493	-1.68905	4.07276	NUMB
regulation of transcription involved in G1/S transition of mitotic cell cycle (GO:0000083)	1/27	0.0965246	0.217807	0.111482	0.251559	-1.73867	4.06494	PCNA
RNA processing (GO:0006396)	3/194	0.0364745	0.191457	0.0501214	0.233421	-1.22394	4.05265	RBM3;NONO;LUC7L3
chromatin remodeling at centromere (GO:0031055)	1/33	0.116693	0.240657	0.133731	0.276616	-1.88185	4.04262	NPM1
heterotypic cell-cell adhesion (GO:0034113)	1/26	0.0931194	0.213591	0.10772	0.247493	-1.69417	4.02173	ITGB1
long-chain fatty-acyl-CoA metabolic process (GO:0035336)	1/26	0.0931194	0.213591	0.10772	0.247493	-1.69058	4.01322	ELOVL1
cellular response to epidermal growth factor stimulus (GO:0071364)	1/26	0.0931194	0.213591	0.10772	0.247493	-1.67694	3.98085	EEF1A1
leukocyte cell-cell adhesion (GO:0007159)	1/28	0.0999173	0.224008	0.115229	0.258336	-1.72083	3.96378	ITGB1
positive regulation of cell cycle G1/S phase transition (GO:1902808)	1/24	0.0862709	0.211121	0.100149	0.247493	-1.6108	3.94688	EIF4G1
positive regulation of angiogenesis (GO:0045766)	2/104	0.0581643	0.195468	0.0734052	0.233421	-1.38133	3.92918	ITGB1;RHOB
replication fork processing (GO:0031297)	1/31	0.11002	0.233121	0.126376	0.268598	-1.76649	3.89882	PCNA
regulation of fibroblast growth factor receptor signaling pathway (GO:0040036)	1/21	0.0759024	0.199819	0.0886724	0.237943	-1.50956	3.89211	NPTN
monovalent inorganic cation homeostasis (GO:0055067)	1/27	0.0965246	0.217807	0.111482	0.251559	-1.66125	3.88392	SLC12A4
RNA phosphodiester bond hydrolysis (GO:0090501)	1/29	0.103297	0.228636	0.11896	0.263304	-1.70451	3.86948	TRIR
regulation of keratinocyte differentiation (GO:0045616)	1/30	0.106665	0.23312	0.122676	0.268113	-1.71592	3.84034	SRSF6
CENP-A containing nucleosome assembly (GO:0034080)	1/31	0.11002	0.233121	0.126376	0.268598	-1.73371	3.82647	NPM1
positive regulation of microtubule polymerization or depolymerization (GO:0031112)	1/25	0.0897015	0.21205	0.103942	0.247493	-1.58508	3.82206	CLIP1
nucleotide-excision repair, DNA gap filling (GO:0006297)	1/24	0.0862709	0.211121	0.100149	0.247493	-1.55604	3.8127	PCNA
protein processing (GO:0016485)	2/102	0.0562037	0.195468	0.0710215	0.233421	-1.31727	3.79211	OGT;METAP2
CENP-A containing chromatin organization (GO:0061641)	1/31	0.11002	0.233121	0.126376	0.268598	-1.71549	3.78624	NPM1
protein deubiquitination (GO:0016579)	3/258	0.0728761	0.199405	0.0972224	0.247493	-1.44171	3.77583	OGT;STAM2;USP19
nucleotide-excision repair, DNA incision, 5'-to lesion (GO:0006296)	1/38	0.13316	0.24483	0.151852	0.280683	-1.8667	3.76366	PCNA
positive regulation of ERBB signaling pathway (GO:1901186)	1/24	0.0862709	0.211121	0.100149	0.247493	-1.52695	3.74142	RTN4
GTP metabolic process (GO:0046039)	1/22	0.0793714	0.205833	0.0925137	0.243549	-1.46637	3.71523	MOCOS
regulation of cell death (GO:0010941)	2/97	0.0514085	0.195468	0.0651787	0.233421	-1.25001	3.70997	SRSF6;EIF4G1
transcription from RNA polymerase II promoter (GO:0006366)	5/486	0.0357765	0.191457	0.0552504	0.233421	-1.10903	3.6936	BTF3;CPSF2;DDX21;YBX1;SRSF6
negative regulation of proteasomal ubiquitin-dependent protein catabolic process (GO:0032435)	1/25	0.0897015	0.21205	0.103942	0.247493	-1.53071	3.69096	OGT
DNA-templated transcription, termination (GO:0006353)	2/107	0.0611494	0.195468	0.0770288	0.233421	-1.31622	3.6781	CPSF2;SRSF6
DNA conformation change (GO:0071103)	1/19	0.0689256	0.197133	0.0809418	0.233421	-1.37253	3.67115	HAT1
very long-chain fatty acid metabolic process (GO:0000038)	1/30	0.106665	0.23312	0.122676	0.268113	-1.63851	3.66709	ELOVL1
mismatch repair (GO:0006298)	1/33	0.116693	0.240657	0.133731	0.276616	-1.70635	3.66559	PCNA
negative regulation of oxidative stress-induced intrinsic apoptotic signaling pathway (GO:1902176)	1/19	0.0689256	0.197133	0.0809418	0.233421	-1.36861	3.66066	NONO
negative regulation of cell morphogenesis involved in differentiation (GO:0010771)	1/31	0.11002	0.233121	0.126376	0.268598	-1.65369	3.64984	RTN4
positive regulation of protein tyrosine kinase activity (GO:0061098)	1/29	0.103297	0.228636	0.11896	0.263304	-1.59234	3.61484	STAP1
positive regulation of DNA replication (GO:0045740)	1/36	0.126609	0.241741	0.144648	0.278478	-1.72517	3.56532	PCNA
negative regulation of plasma membrane bounded cell projection assembly (GO:0120033)	1/21	0.0759024	0.199819	0.0886724	0.237943	-1.37792	3.5527	STAP1
positive regulation of dendrite development (GO:1900006)	1/33	0.116693	0.240657	0.133731	0.276616	-1.65344	3.55195	CAPRIN1
positive regulation of gene expression (GO:0010628)	6/772	0.0694456	0.197806	0.1079	0.247493	-1.32563	3.53574	RBM3;NPM1;DDX21;STAP1;EEF2;HNRNPAB
fatty-acyl-CoA biosynthetic process (GO:0046949)	1/31	0.11002	0.233121	0.126376	0.268598	-1.60064	3.53275	ELOVL1
lysosome localization (GO:0032418)	1/30	0.106665	0.23312	0.122676	0.268113	-1.56644	3.50578	MILR1
regulation of alcohol biosynthetic process (GO:1902930)	1/35	0.123316	0.241741	0.141024	0.278478	-1.65259	3.45887	HMGCS1
regulation of mRNA stability (GO:0043488)	2/129	0.0845226	0.211121	0.105191	0.247493	-1.39966	3.45818	NPM1;EIF4G1
microtubule bundle formation (GO:0001578)	1/33	0.116693	0.240657	0.133731	0.276616	-1.60645	3.451	CLIP1
histone exchange (GO:0043486)	1/37	0.129891	0.243984	0.148258	0.280683	-1.66217	3.3926	NPM1
regulation of wound healing (GO:0061041)	1/35	0.123316	0.241741	0.141024	0.278478	-1.61294	3.3759	SRSF6
translational elongation (GO:0006414)	2/106	0.0601486	0.195468	0.0758146	0.233421	-1.19496	3.35897	EEF1A1;EEF2
response to UV (GO:0009411)	2/99	0.0533081	0.195468	0.0674955	0.233421	-1.13816	3.33671	NPM1;PCNA
regulation of actin cytoskeleton reorganization (GO:2000249)	1/31	0.11002	0.233121	0.126376	0.268598	-1.50436	3.32027	STAP1
regulation of nitric-oxide synthase activity (GO:0050999)	1/37	0.129891	0.243984	0.148258	0.280683	-1.61977	3.30605	NOSIP
positive regulation of developmental process (GO:0051094)	2/114	0.0683127	0.197133	0.0856982	0.237292	-1.231	3.3036	SRSF6;RTN4
positive regulation of T cell differentiation (GO:0045582)	1/33	0.116693	0.240657	0.133731	0.276616	-1.53466	3.29678	ADAM8
secondary alcohol biosynthetic process (GO:1902653)	1/37	0.129891	0.243984	0.148258	0.280683	-1.60893	3.28393	HMGCS1
platelet aggregation (GO:0070527)	1/34	0.120011	0.241741	0.137385	0.278375	-1.54281	3.27104	TLN1
positive regulation of epithelial cell proliferation (GO:0050679)	2/108	0.062156	0.195468	0.0782492	0.233421	-1.17627	3.26781	SRSF6;RTN4
positive regulation of tumor necrosis factor superfamily cytokine production (GO:1903557)	1/33	0.116693	0.240657	0.133731	0.276616	-1.51961	3.26445	ADAM8
negative regulation of axonogenesis (GO:0050771)	1/24	0.0862709	0.211121	0.100149	0.247493	-1.32985	3.25848	RTN4
acyl-CoA metabolic process (GO:0006637)	1/40	0.139661	0.2489	0.158995	0.285274	-1.6532	3.25438	HMGCS1
cellular glucose homeostasis (GO:0001678)	1/34	0.120011	0.241741	0.137385	0.278375	-1.52939	3.24258	OGT
multivesicular body assembly (GO:0036258)	1/31	0.11002	0.233121	0.126376	0.268598	-1.46796	3.23992	STAM2
tRNA export from nucleus (GO:0006409)	1/34	0.120011	0.241741	0.137385	0.278375	-1.52327	3.22959	SSB
protein glycosylation (GO:0006486)	2/131	0.0867655	0.211586	0.107875	0.247493	-1.32009	3.22703	GFPT1;OGT
DNA-dependent DNA replication maintenance of fidelity (GO:0045005)	1/36	0.126609	0.241741	0.144648	0.278478	-1.555	3.21363	PCNA
regulation of nervous system development (GO:0051960)	1/26	0.0931194	0.213591	0.10772	0.247493	-1.35295	3.21173	RTN4
mRNA stabilization (GO:0048255)	1/34	0.120011	0.241741	0.137385	0.278375	-1.5144	3.21079	YBX1
'de novo' posttranslational protein folding (GO:0051084)	1/31	0.11002	0.233121	0.126376	0.268598	-1.453	3.2069	DNAJC7
regulation of cell-cell adhesion (GO:0022407)	1/33	0.116693	0.240657	0.133731	0.276616	-1.49125	3.20352	ADAM8
negative regulation of catalytic activity (GO:0043086)	1/27	0.0965246	0.217807	0.111482	0.251559	-1.36599	3.19362	NOSIP
response to endoplasmic reticulum stress (GO:0034976)	2/107	0.0611494	0.195468	0.0770288	0.233421	-1.1419	3.19096	SELENOK;USP19
autophagosome maturation (GO:0097352)	1/24	0.0862709	0.211121	0.100149	0.247493	-1.30108	3.18799	GABARAPL2
tRNA-containing ribonucleoprotein complex export from nucleus (GO:0071431)	1/34	0.120011	0.241741	0.137385	0.278375	-1.50276	3.18611	SSB
coenzyme biosynthetic process (GO:0009108)	1/30	0.106665	0.23312	0.122676	0.268113	-1.42314	3.18508	MAT2A
histone H3-K4 methylation (GO:0051568)	1/24	0.0862709	0.211121	0.100149	0.247493	-1.29841	3.18145	OGT
epithelial tube morphogenesis (GO:0060562)	1/35	0.123316	0.241741	0.141024	0.278478	-1.51887	3.17901	RHOB
cholesterol biosynthetic process (GO:0006695)	1/36	0.126609	0.241741	0.144648	0.278478	-1.53417	3.17059	HMGCS1
autophagy of mitochondrion (GO:0000422)	1/41	0.142894	0.2489	0.162545	0.285274	-1.62264	3.15708	GABARAPL2
positive regulation of DNA repair (GO:0045739)	1/39	0.136416	0.247544	0.155431	0.282786	-1.58132	3.15007	PCNA
intra-Golgi vesicle-mediated transport (GO:0006891)	1/34	0.120011	0.241741	0.137385	0.278375	-1.48575	3.15005	GABARAPL2
protein palmitoylation (GO:0018345)	1/31	0.11002	0.233121	0.126376	0.268598	-1.42698	3.14949	SELENOK
organic cyclic compound biosynthetic process (GO:1901362)	1/38	0.13316	0.24483	0.151852	0.280683	-1.55776	3.14077	MOCOS
multivesicular body organization (GO:0036257)	1/32	0.113362	0.238748	0.130061	0.274749	-1.433	3.11989	STAM2
regulation of coenzyme metabolic process (GO:0051196)	1/40	0.139661	0.2489	0.158995	0.285274	-1.58077	3.11181	OGT
centromere complex assembly (GO:0034508)	1/37	0.129891	0.243984	0.148258	0.280683	-1.50516	3.07213	NPM1
mRNA transport (GO:0051028)	2/105	0.0591535	0.195468	0.0746067	0.233421	-1.08397	3.06505	CPSF2;SRSF6
mRNA export from nucleus (GO:0006406)	2/106	0.0601486	0.195468	0.0758146	0.233421	-1.08978	3.06329	CPSF2;SRSF6
macroautophagy (GO:0016236)	2/111	0.0652095	0.19682	0.081947	0.235344	-1.1193	3.05586	GABARAPL2;STAM2
endoplasmic reticulum organization (GO:0007029)	1/35	0.123316	0.241741	0.141024	0.278478	-1.45824	3.05211	RTN4
positive regulation of mitotic cell cycle phase transition (GO:1901992)	1/41	0.142894	0.2489	0.162545	0.285274	-1.55371	3.02298	EIF4G1
protein acylation (GO:0043543)	1/37	0.129891	0.243984	0.148258	0.280683	-1.47001	3.00039	SELENOK
cofactor biosynthetic process (GO:0051188)	1/32	0.113362	0.238748	0.130061	0.274749	-1.37721	2.99842	MOCOS
mitochondrion disassembly (GO:0061726)	1/39	0.136416	0.247544	0.155431	0.282786	-1.48586	2.9599	GABARAPL2
positive regulation of response to DNA damage stimulus (GO:2001022)	1/50	0.171454	0.273933	0.193834	0.310403	-1.6767	2.95675	PCNA
positive regulation of innate immune response (GO:0045089)	1/39	0.136416	0.247544	0.155431	0.282786	-1.47915	2.94652	ADAM8
tRNA transport (GO:0051031)	1/36	0.126609	0.241741	0.144648	0.278478	-1.4247	2.94436	SSB
regulation of cholesterol biosynthetic process (GO:0045540)	1/41	0.142894	0.2489	0.162545	0.285274	-1.51215	2.94212	HMGCS1
homotypic cell-cell adhesion (GO:0034109)	1/39	0.136416	0.247544	0.155431	0.282786	-1.47572	2.93969	TLN1
coenzyme metabolic process (GO:0006732)	1/52	0.177672	0.280005	0.20063	0.317626	-1.69832	2.93438	MOCOS
positive regulation of leukocyte migration (GO:0002687)	1/35	0.123316	0.241741	0.141024	0.278478	-1.39958	2.92932	ADAM8
phosphatidylserine metabolic process (GO:0006658)	1/28	0.0999173	0.224008	0.115229	0.258336	-1.26554	2.91506	SERINC1
potassium ion import (GO:0010107)	1/39	0.136416	0.247544	0.155431	0.282786	-1.45992	2.90823	SLC12A4
organophosphate biosynthetic process (GO:0090407)	1/37	0.129891	0.243984	0.148258	0.280683	-1.42373	2.90591	MOCOS
regulation of synapse assembly (GO:0051963)	1/36	0.126609	0.241741	0.144648	0.278478	-1.40592	2.90553	EIF4G1
sphingolipid metabolic process (GO:0006665)	2/117	0.071464	0.198942	0.0895009	0.239243	-1.10113	2.9054	ELOVL1;SERINC1
negative regulation of protein modification by small protein conjugation or removal (GO:1903321)	1/47	0.16204	0.264983	0.183534	0.301552	-1.59309	2.89927	OGT
epithelial to mesenchymal transition (GO:0001837)	1/38	0.13316	0.24483	0.151852	0.280683	-1.4356	2.89447	HNRNPAB
regulation of axon extension (GO:0030516)	1/35	0.123316	0.241741	0.141024	0.278478	-1.38205	2.89264	RTN4
regulation of insulin receptor signaling pathway (GO:0046626)	1/35	0.123316	0.241741	0.141024	0.278478	-1.37543	2.87877	OGT
actin filament bundle organization (GO:0061572)	1/36	0.126609	0.241741	0.144648	0.278478	-1.39259	2.878	RHOB
translesion synthesis (GO:0019985)	1/43	0.149323	0.255615	0.1696	0.293213	-1.49774	2.84816	PCNA
regulation of peptidyl-threonine phosphorylation (GO:0010799)	1/38	0.13316	0.24483	0.151852	0.280683	-1.41211	2.84711	EIF4G1
sterol biosynthetic process (GO:0016126)	1/41	0.142894	0.2489	0.162545	0.285274	-1.4612	2.84299	HMGCS1
telomere organization (GO:0032200)	1/42	0.146115	0.251984	0.166079	0.289286	-1.47131	2.82986	PCNA
positive regulation of phagocytosis (GO:0050766)	1/40	0.139661	0.2489	0.158995	0.285274	-1.43259	2.82011	STAP1
cellular response to radiation (GO:0071478)	1/43	0.149323	0.255615	0.1696	0.293213	-1.48188	2.818	RHOB
regulation of DNA repair (GO:0006282)	1/38	0.13316	0.24483	0.151852	0.280683	-1.3881	2.79871	PCNA
regulation of phosphorylation (GO:0042325)	2/120	0.0746621	0.199819	0.0933533	0.244832	-1.0661	2.7663	STAP1;OGT
negative regulation of ERBB signaling pathway (GO:1901185)	1/44	0.15252	0.257912	0.173105	0.295597	-1.46314	2.75137	STAM2
protein acetylation (GO:0006473)	1/34	0.120011	0.241741	0.137385	0.278375	-1.29743	2.75079	HAT1
regulation of G1/S transition of mitotic cell cycle (GO:2000045)	1/47	0.16204	0.264983	0.183534	0.301552	-1.50973	2.74758	EIF4G1
establishment of protein localization to organelle (GO:0072594)	1/63	0.211058	0.301822	0.23701	0.341747	-1.75784	2.73454	HEATR3
nucleocytoplasmic transport (GO:0006913)	1/47	0.16204	0.264983	0.183534	0.301552	-1.50085	2.73142	NPM1
cellular response to ionizing radiation (GO:0071479)	1/47	0.16204	0.264983	0.183534	0.301552	-1.4941	2.71912	RHOB
negative regulation of cytokine-mediated signaling pathway (GO:0001960)	1/41	0.142894	0.2489	0.162545	0.285274	-1.39213	2.7086	STAP1
positive regulation of receptor activity (GO:2000273)	1/38	0.13316	0.24483	0.151852	0.280683	-1.34159	2.70493	ITGB1
regulation of steroid biosynthetic process (GO:0050810)	1/45	0.155705	0.260133	0.176596	0.297177	-1.45189	2.70021	HMGCS1
positive regulation of NF-kappaB transcription factor activity (GO:0051092)	2/129	0.0845226	0.211121	0.105191	0.247493	-1.0892	2.69114	NPM1;ADAM8
posttranscriptional regulation of gene expression (GO:0010608)	1/45	0.155705	0.260133	0.176596	0.297177	-1.4449	2.6872	RBM3
regulation of cholesterol metabolic process (GO:0090181)	1/42	0.146115	0.251984	0.166079	0.289286	-1.39693	2.6868	HMGCS1
unsaturated fatty acid metabolic process (GO:0033559)	1/45	0.155705	0.260133	0.176596	0.297177	-1.44231	2.68239	ELOVL1
protein modification by small protein removal (GO:0070646)	3/262	0.0755443	0.199819	0.100616	0.247493	-1.0384	2.68223	OGT;STAM2;USP19
regulation of alternative mRNA splicing, via spliceosome (GO:0000381)	1/40	0.139661	0.2489	0.158995	0.285274	-1.3586	2.67446	SRSF6
positive regulation of peptide secretion (GO:0002793)	1/36	0.126609	0.241741	0.144648	0.278478	-1.29306	2.6723	ADAM8
inositol lipid-mediated signaling (GO:0048017)	1/40	0.139661	0.2489	0.158995	0.285274	-1.3462	2.65003	OGT
anatomical structure homeostasis (GO:0060249)	1/36	0.126609	0.241741	0.144648	0.278478	-1.27433	2.63359	PCNA
heterophilic cell-cell adhesion via plasma membrane cell adhesion molecules (GO:0007157)	1/48	0.16519	0.266993	0.186982	0.30292	-1.44389	2.59995	ALCAM
response to hydrogen peroxide (GO:0042542)	1/44	0.15252	0.257912	0.173105	0.295597	-1.3781	2.59146	RHOB
endosome to lysosome transport (GO:0008333)	1/49	0.168328	0.27018	0.190415	0.30705	-1.45071	2.58494	RHOB
negative regulation of epidermal growth factor receptor signaling pathway (GO:0042059)	1/41	0.142894	0.2489	0.162545	0.285274	-1.32429	2.57661	STAM2
positive regulation of cell development (GO:0010720)	1/35	0.123316	0.241741	0.141024	0.278478	-1.22852	2.57131	NUMB
response to peptide hormone (GO:0043434)	1/41	0.142894	0.2489	0.162545	0.285274	-1.32153	2.57125	OGT
autophagosome organization (GO:1905037)	1/57	0.193017	0.290991	0.217373	0.328423	-1.56148	2.56859	GABARAPL2
regulation of ATP metabolic process (GO:1903578)	1/44	0.15252	0.257912	0.173105	0.295597	-1.35147	2.54138	OGT
negative regulation of autophagy (GO:0010507)	1/47	0.16204	0.264983	0.183534	0.301552	-1.39551	2.53971	EIF4G1
regulation of epithelial cell migration (GO:0010632)	1/49	0.168328	0.27018	0.190415	0.30705	-1.41186	2.5157	RTN4
mesenchymal cell differentiation (GO:0048762)	1/42	0.146115	0.251984	0.166079	0.289286	-1.3038	2.50768	HNRNPAB
regulation of microtubule polymerization (GO:0031113)	1/36	0.126609	0.241741	0.144648	0.278478	-1.20605	2.49247	CLIP1
positive regulation of protein localization to plasma membrane (GO:1903078)	1/44	0.15252	0.257912	0.173105	0.295597	-1.30518	2.45434	ITGB1
nucleotide-excision repair, DNA incision (GO:0033683)	1/41	0.142894	0.2489	0.162545	0.285274	-1.25745	2.44656	PCNA
positive regulation of gene expression, epigenetic (GO:0045815)	1/48	0.16519	0.266993	0.186982	0.30292	-1.35777	2.44487	DDX21
positive regulation of hydrolase activity (GO:0051345)	2/173	0.137448	0.248767	0.167812	0.291574	-1.22702	2.43503	ITGB1;GABARAPL2
neuron projection morphogenesis (GO:0048812)	2/164	0.126087	0.241741	0.154489	0.282786	-1.17298	2.42899	ALCAM;RTN4
regulation of angiogenesis (GO:0045765)	2/178	0.143856	0.24995	0.1753	0.297177	-1.24136	2.40692	ITGB1;RHOB
protein heterooligomerization (GO:0051291)	1/50	0.171454	0.273933	0.193834	0.310403	-1.35966	2.39768	MAT2A
regulation of organelle assembly (GO:1902115)	1/48	0.16519	0.266993	0.186982	0.30292	-1.32596	2.3876	NPM1
regulation of carbohydrate catabolic process (GO:0043470)	1/38	0.13316	0.24483	0.151852	0.280683	-1.18098	2.38109	OGT
protein complex disassembly (GO:0043241)	1/47	0.16204	0.264983	0.183534	0.301552	-1.28741	2.34297	GABARAPL2
positive regulation of ATPase activity (GO:0032781)	1/36	0.126609	0.241741	0.144648	0.278478	-1.12434	2.32361	GABARAPL2
positive regulation of secretion by cell (GO:1903532)	1/53	0.180764	0.282317	0.204007	0.32078	-1.34997	2.30921	ADAM8
postreplication repair (GO:0006301)	1/48	0.16519	0.266993	0.186982	0.30292	-1.27234	2.29105	PCNA
positive regulation of cell death (GO:0010942)	1/58	0.196052	0.291769	0.22068	0.329834	-1.40007	2.28124	EIF4G1
regulation of dendrite morphogenesis (GO:0048814)	1/45	0.155705	0.260133	0.176596	0.297177	-1.22377	2.27595	CAPRIN1
regulation of generation of precursor metabolites and energy (GO:0043467)	1/47	0.16204	0.264983	0.183534	0.301552	-1.2418	2.25996	OGT
cytoplasmic translation (GO:0002181)	1/55	0.186913	0.289966	0.210718	0.328423	-1.34396	2.25397	RPL35A
cellular defense response (GO:0006968)	1/57	0.193017	0.290991	0.217373	0.328423	-1.36614	2.24727	ITGB1
Notch signaling pathway (GO:0007219)	1/56	0.189971	0.290991	0.214052	0.328423	-1.34516	2.23416	YBX1
cell morphogenesis (GO:0000902)	1/60	0.202088	0.293803	0.227253	0.333209	-1.39362	2.22846	ADAM8
ribosome assembly (GO:0042255)	1/57	0.193017	0.290991	0.217373	0.328423	-1.34242	2.20824	NPM1
lymphocyte chemotaxis (GO:0048247)	1/45	0.155705	0.260133	0.176596	0.297177	-1.17246	2.18054	ADAM8
positive regulation of protein localization to cell periphery (GO:1904377)	1/47	0.16204	0.264983	0.183534	0.301552	-1.19678	2.17803	ITGB1
regulation of glycolytic process (GO:0006110)	1/58	0.196052	0.291769	0.22068	0.329834	-1.33634	2.1774	OGT
regulation of ATPase activity (GO:0043462)	1/41	0.142894	0.2489	0.162545	0.285274	-1.11572	2.1708	GABARAPL2
actin filament bundle assembly (GO:0051017)	1/38	0.13316	0.24483	0.151852	0.280683	-1.06675	2.15078	RHOB
negative regulation of protein ubiquitination (GO:0031397)	1/51	0.174569	0.277633	0.197239	0.314407	-1.1815	2.06224	OGT
receptor internalization (GO:0031623)	1/51	0.174569	0.277633	0.197239	0.314407	-1.18143	2.0621	ITGB1
membrane lipid biosynthetic process (GO:0046467)	1/61	0.205089	0.295883	0.230519	0.336577	-1.29506	2.05178	ELOVL1
regulation of axonogenesis (GO:0050770)	1/56	0.189971	0.290991	0.214052	0.328423	-1.23399	2.04951	RTN4
regulation of gene silencing by RNA (GO:0060966)	1/56	0.189971	0.290991	0.214052	0.328423	-1.23336	2.04847	EIF4G1
telomere maintenance (GO:0000723)	1/52	0.177672	0.280005	0.20063	0.317626	-1.18461	2.04678	PCNA
regulation of posttranscriptional gene silencing (GO:0060147)	1/56	0.189971	0.290991	0.214052	0.328423	-1.23049	2.0437	EIF4G1
chromatin assembly (GO:0031497)	1/66	0.219929	0.306313	0.246646	0.347002	-1.34308	2.03403	NPM1
chloride transmembrane transport (GO:1902476)	1/58	0.196052	0.291769	0.22068	0.329834	-1.24619	2.03052	SLC12A4
regulation of epidermal growth factor receptor signaling pathway (GO:0042058)	1/59	0.199075	0.291893	0.223974	0.330492	-1.25337	2.02302	STAM2
positive regulation of immune response (GO:0050778)	1/55	0.186913	0.289966	0.210718	0.328423	-1.20223	2.01627	ADAM8
B cell differentiation (GO:0030183)	1/53	0.180764	0.282317	0.204007	0.32078	-1.1739	2.00803	ITGB1
protein import (GO:0017038)	1/57	0.193017	0.290991	0.217373	0.328423	-1.21982	2.00658	HEATR3
regulation of mRNA splicing, via spliceosome (GO:0048024)	1/61	0.205089	0.295883	0.230519	0.336577	-1.26281	2.00069	SRSF6
long-chain fatty acid metabolic process (GO:0001676)	1/56	0.189971	0.290991	0.214052	0.328423	-1.20244	1.99712	ELOVL1
fatty acid biosynthetic process (GO:0006633)	1/48	0.16519	0.266993	0.186982	0.30292	-1.10675	1.99288	ELOVL1
autophagosome assembly (GO:0000045)	1/59	0.199075	0.291893	0.223974	0.330492	-1.21908	1.96768	GABARAPL2
positive regulation of protein transport (GO:0051222)	1/57	0.193017	0.290991	0.217373	0.328423	-1.18975	1.95712	ADAM8
negative regulation of cellular process (GO:0048523)	4/535	0.141192	0.2489	0.191096	0.307434	-0.997477	1.95269	NPM1;SRSF6;RTN4;RHOB
RNA modification (GO:0009451)	1/55	0.186913	0.289966	0.210718	0.328423	-1.16249	1.94962	SSB
regulation of epithelial cell proliferation (GO:0050678)	1/73	0.240246	0.320604	0.268667	0.359076	-1.35029	1.92564	SRSF6
metal ion homeostasis (GO:0055065)	1/46	0.158879	0.264798	0.180072	0.301552	-1.04219	1.91724	SLC12A4
positive regulation of cell migration (GO:0030335)	2/222	0.202468	0.293803	0.242957	0.345298	-1.19977	1.91623	NUMB;RTN4
phosphate-containing compound metabolic process (GO:0006796)	2/184	0.151627	0.257912	0.184356	0.302188	-1.01516	1.91492	GFPT1;MOCOS
negative regulation of neuron projection development (GO:0010977)	1/52	0.177672	0.280005	0.20063	0.317626	-1.10772	1.91394	RTN4
positive regulation of cell adhesion (GO:0045785)	1/65	0.216983	0.304038	0.243448	0.345298	-1.24711	1.9055	ADAM8
receptor metabolic process (GO:0043112)	1/59	0.199075	0.291893	0.223974	0.330492	-1.16358	1.8781	ITGB1
integrin-mediated signaling pathway (GO:0007229)	1/59	0.199075	0.291893	0.223974	0.330492	-1.15372	1.86218	ITGB1
phosphatidylinositol-mediated signaling (GO:0048015)	1/57	0.193017	0.290991	0.217373	0.328423	-1.12484	1.85034	OGT
regulation of gene silencing by miRNA (GO:0060964)	1/68	0.225788	0.311973	0.253004	0.353088	-1.23503	1.83792	EIF4G1
positive regulation of nervous system development (GO:0051962)	1/53	0.180764	0.282317	0.204007	0.32078	-1.06852	1.82778	NUMB
negative regulation of apoptotic process (GO:0043066)	4/486	0.109602	0.233121	0.150852	0.280683	-0.825877	1.82593	ITGB1;NPM1;ADAM8;HYPK
positive regulation of peptidyl-serine phosphorylation (GO:0033138)	1/84	0.271123	0.340742	0.301999	0.382312	-1.39689	1.8232	EIF4G1
response to insulin (GO:0032868)	1/72	0.237376	0.320604	0.265561	0.359076	-1.2605	1.81274	OGT
protein oligomerization (GO:0051259)	2/218	0.197013	0.291893	0.236721	0.341747	-1.10325	1.79222	NPM1;MAT2A
chloride transport (GO:0006821)	1/74	0.243105	0.320604	0.271761	0.359076	-1.25806	1.77923	SLC12A4
organonitrogen compound biosynthetic process (GO:1901566)	2/182	0.149027	0.255615	0.181329	0.301552	-0.930721	1.77175	ELOVL1;MOCOS
positive regulation of cell morphogenesis involved in differentiation (GO:0010770)	1/59	0.199075	0.291893	0.223974	0.330492	-1.09569	1.76853	CAPRIN1
regulation of apoptotic process (GO:0042981)	5/816	0.191184	0.290991	0.262815	0.359076	-1.05822	1.75084	ITGB1;NPM1;HYPK;RTN4;RHOB
mitotic cytokinesis (GO:0000281)	1/60	0.202088	0.293803	0.227253	0.333209	-1.09268	1.74726	RHOB
nucleosome organization (GO:0034728)	1/80	0.260041	0.331612	0.290055	0.372621	-1.2855	1.73147	NPM1
positive regulation of inflammatory response (GO:0050729)	1/74	0.243105	0.320604	0.271761	0.359076	-1.21228	1.71448	ADAM8
tRNA modification (GO:0006400)	1/58	0.196052	0.291769	0.22068	0.329834	-1.05192	1.71397	SSB
regulation of neurogenesis (GO:0050767)	1/58	0.196052	0.291769	0.22068	0.329834	-1.04699	1.70594	NUMB
tRNA processing (GO:0008033)	1/63	0.211058	0.301822	0.23701	0.341747	-1.0956	1.70434	SSB
ubiquitin-dependent ERAD pathway (GO:0030433)	1/59	0.199075	0.291893	0.223974	0.330492	-1.05128	1.69684	USP19
protein sumoylation (GO:0016925)	1/69	0.228701	0.314747	0.256163	0.354647	-1.14325	1.68669	PCNA
positive regulation of endothelial cell migration (GO:0010595)	1/71	0.234495	0.319557	0.262441	0.359076	-1.1572	1.67832	RHOB
cell junction assembly (GO:0034329)	1/60	0.202088	0.293803	0.227253	0.333209	-1.04893	1.6773	TLN1
negative regulation of cellular macromolecule biosynthetic process (GO:2000113)	4/513	0.12658	0.241741	0.172599	0.295597	-0.800052	1.65361	CAPRIN1;NONO;RIOX2;GATAD2A
histone acetylation (GO:0016573)	1/72	0.237376	0.320604	0.265561	0.359076	-1.14721	1.64981	HAT1
transcription-coupled nucleotide-excision repair (GO:0006283)	1/74	0.243105	0.320604	0.271761	0.359076	-1.14581	1.62047	PCNA
glycerophospholipid metabolic process (GO:0006650)	1/65	0.216983	0.304038	0.243448	0.345298	-1.05357	1.60979	SERINC1
regulation of neuron death (GO:1901214)	1/73	0.240246	0.320604	0.268667	0.359076	-1.12448	1.60362	EIF4G1
positive regulation of cytoskeleton organization (GO:0051495)	1/78	0.254438	0.327471	0.284008	0.36757	-1.17008	1.60149	STAP1
nucleic acid-templated transcription (GO:0097659)	1/77	0.25162	0.326261	0.280965	0.365675	-1.15345	1.59158	PTMA
cellular response to reactive oxygen species (GO:0034614)	1/66	0.219929	0.306313	0.246646	0.347002	-1.04646	1.58481	RHOB
nuclear import (GO:0051170)	1/72	0.237376	0.320604	0.265561	0.359076	-1.09627	1.57655	HEATR3
cell-cell junction organization (GO:0045216)	1/73	0.240246	0.320604	0.268667	0.359076	-1.10416	1.57463	TLN1
positive regulation of synaptic transmission (GO:0050806)	1/68	0.225788	0.311973	0.253004	0.353088	-1.05702	1.57301	NPTN
cholesterol metabolic process (GO:0008203)	1/69	0.228701	0.314747	0.256163	0.354647	-1.06198	1.56679	HMGCS1
B cell activation (GO:0042113)	1/74	0.243105	0.320604	0.271761	0.359076	-1.10698	1.56556	ITGB1
regulation of MAP kinase activity (GO:0043405)	1/88	0.282041	0.350033	0.313745	0.392888	-1.23391	1.56176	ADAM8
regulation of proteolysis (GO:0030162)	1/64	0.214026	0.302949	0.240236	0.344967	-1.01165	1.55962	OGT
regulation of peptidyl-serine phosphorylation (GO:0033135)	1/87	0.279327	0.347285	0.310827	0.389936	-1.2184	1.55391	EIF4G1
positive regulation of protein complex assembly (GO:0031334)	1/89	0.284745	0.350883	0.316651	0.393689	-1.23053	1.54574	EIF4G1
regulation of autophagy (GO:0010506)	2/204	0.178086	0.280023	0.21499	0.328423	-0.89498	1.54428	EEF1A1;EIF4G1
organelle assembly (GO:0070925)	3/377	0.168185	0.27018	0.214817	0.328423	-0.865662	1.54321	GABARAPL2;NPM1;STAM2
positive regulation of protein polymerization (GO:0032273)	1/65	0.216983	0.304038	0.243448	0.345298	-1.00788	1.53998	CLIP1
inorganic anion transmembrane transport (GO:0098661)	1/65	0.216983	0.304038	0.243448	0.345298	-1.00612	1.5373	SLC12A4
RNA transport (GO:0050658)	1/81	0.262827	0.334551	0.293059	0.375094	-1.14725	1.53303	SRSF6
negative regulation of cellular catabolic process (GO:0031330)	1/57	0.193017	0.290991	0.217373	0.328423	-0.931506	1.53231	EIF4G1
extracellular matrix organization (GO:0030198)	2/230	0.21343	0.302949	0.255451	0.354647	-0.989458	1.52816	ITGB1;ADAM8
positive regulation of sequence-specific DNA binding transcription factor activity (GO:0051091)	2/216	0.194293	0.291769	0.233606	0.339898	-0.931988	1.52696	NPM1;ADAM8
positive regulation of growth (GO:0045927)	1/72	0.237376	0.320604	0.265561	0.359076	-1.05531	1.51765	EIF4G1
regulation of DNA replication (GO:0006275)	1/62	0.208079	0.29941	0.233772	0.339898	-0.964978	1.51486	PCNA
negative regulation of cell cycle (GO:0045786)	1/73	0.240246	0.320604	0.268667	0.359076	-1.05643	1.50657	RHOB
DNA synthesis involved in DNA repair (GO:0000731)	1/66	0.219929	0.306313	0.246646	0.347002	-0.992547	1.50317	PCNA
lymphocyte differentiation (GO:0030098)	1/74	0.243105	0.320604	0.271761	0.359076	-1.06278	1.50305	ITGB1
regulation of actin filament-based process (GO:0032970)	1/63	0.211058	0.301822	0.23701	0.341747	-0.964641	1.50062	RHOB
nucleic acid phosphodiester bond hydrolysis (GO:0090305)	1/74	0.243105	0.320604	0.271761	0.359076	-1.05623	1.49379	PCNA
regulation of Ras protein signal transduction (GO:0046578)	1/91	0.290124	0.354369	0.322427	0.397317	-1.20379	1.48963	OGT
negative regulation of cellular amide metabolic process (GO:0034249)	1/76	0.248793	0.324411	0.27791	0.363059	-1.06678	1.48404	CAPRIN1
cellular response to decreased oxygen levels (GO:0036294)	1/65	0.216983	0.304038	0.243448	0.345298	-0.970546	1.48293	ADAM8
Ras protein signal transduction (GO:0007265)	2/224	0.205203	0.295883	0.246078	0.347002	-0.9359	1.48224	G3BP1;RHOB
regulation of innate immune response (GO:0045088)	1/70	0.231603	0.317484	0.259308	0.357578	-1.00888	1.47571	ADAM8
endosomal transport (GO:0016197)	2/230	0.21343	0.302949	0.255451	0.354647	-0.948674	1.46517	STAM2;RHOB
positive regulation of cell projection organization (GO:0031346)	1/64	0.214026	0.302949	0.240236	0.344967	-0.947943	1.4614	NPTN
sphingolipid biosynthetic process (GO:0030148)	1/67	0.222864	0.309162	0.249832	0.350067	-0.972155	1.45939	ELOVL1
regulation of cell growth (GO:0001558)	2/202	0.175407	0.278328	0.211901	0.328423	-0.83823	1.45906	RTN4;EIF4G1
positive regulation of DNA metabolic process (GO:0051054)	1/83	0.268368	0.338177	0.299031	0.379494	-1.10579	1.45455	PCNA
regulation of actin cytoskeleton organization (GO:0032956)	1/76	0.248793	0.324411	0.27791	0.363059	-1.04386	1.45215	RHOB
neutrophil degranulation (GO:0043312)	3/480	0.268595	0.338177	0.332319	0.404486	-1.10419	1.45151	EEF1A1;ADAM8;EEF2
hemopoiesis (GO:0030097)	1/77	0.25162	0.326261	0.280965	0.365675	-1.05067	1.44974	PRRC2C
positive regulation of cell proliferation (GO:0008284)	3/425	0.213674	0.302949	0.268769	0.359076	-0.934553	1.4423	NPM1;RPS9;EIF4G1
positive regulation of cellular protein localization (GO:1903829)	1/67	0.222864	0.309162	0.249832	0.350067	-0.946347	1.42065	RTN4
lysosomal transport (GO:0007041)	1/73	0.240246	0.320604	0.268667	0.359076	-0.99538	1.4195	RHOB
negative regulation of phosphorylation (GO:0042326)	1/76	0.248793	0.324411	0.27791	0.363059	-1.01796	1.41612	STAP1
positive regulation of defense response (GO:0031349)	1/75	0.245954	0.322525	0.274842	0.361087	-1.00947	1.41589	ADAM8
regulation of endothelial cell migration (GO:0010594)	1/70	0.231603	0.317484	0.259308	0.357578	-0.96345	1.40927	RHOB
protein N-linked glycosylation (GO:0006487)	1/74	0.243105	0.320604	0.271761	0.359076	-0.994924	1.40708	GFPT1
regulation of proteasomal ubiquitin-dependent protein catabolic process (GO:0032434)	1/89	0.284745	0.350883	0.316651	0.393689	-1.10729	1.39093	OGT
neutrophil mediated immunity (GO:0002446)	3/488	0.276743	0.344689	0.341606	0.40872	-1.07144	1.37645	EEF1A1;ADAM8;EEF2
protein localization to nucleus (GO:0034504)	1/97	0.306021	0.365437	0.339468	0.408183	-1.15929	1.37272	HEATR3
positive regulation of cell cycle (GO:0045787)	1/83	0.268368	0.338177	0.299031	0.379494	-1.03921	1.36698	USP19
regulation of G-protein coupled receptor protein signaling pathway (GO:0008277)	1/75	0.245954	0.322525	0.274842	0.361087	-0.973012	1.36476	METAP2
regulation of gene expression, epigenetic (GO:0040029)	1/75	0.245954	0.322525	0.274842	0.361087	-0.97157	1.36273	DDX21
protein-DNA complex assembly (GO:0065004)	1/92	0.292798	0.35576	0.325297	0.398732	-1.0932	1.34275	NPM1
regulation of cell cycle process (GO:0010564)	1/91	0.290124	0.354369	0.322427	0.397317	-1.06804	1.32165	USP19
Rho protein signal transduction (GO:0007266)	1/73	0.240246	0.320604	0.268667	0.359076	-0.921913	1.31473	RHOB
cytoskeleton-dependent cytokinesis (GO:0061640)	1/71	0.234495	0.319557	0.262441	0.359076	-0.902987	1.30962	RHOB
divalent metal ion transport (GO:0070838)	1/89	0.284745	0.350883	0.316651	0.393689	-1.04143	1.3082	SELENOK
regulation of protein catabolic process (GO:0042176)	1/92	0.292798	0.35576	0.325297	0.398732	-1.06037	1.30242	EEF1A1
extracellular matrix disassembly (GO:0022617)	1/79	0.257244	0.329861	0.287037	0.370113	-0.953248	1.29425	ADAM8
regulation of cellular response to heat (GO:1900034)	1/79	0.257244	0.329861	0.287037	0.370113	-0.949304	1.2889	DNAJC7
regulation of cell cycle G2/M phase transition (GO:1902749)	1/85	0.273868	0.34172	0.304954	0.383901	-0.992628	1.28556	NPM1
positive regulation of cellular metabolic process (GO:0031325)	1/93	0.295462	0.357124	0.328155	0.400821	-1.04318	1.27186	EIF4G1
cellular response to lipopolysaccharide (GO:0071222)	1/92	0.292798	0.35576	0.325297	0.398732	-1.0328	1.26855	STAP1
cell-matrix adhesion (GO:0007160)	1/91	0.290124	0.354369	0.322427	0.397317	-1.01897	1.26092	ITGB1
positive regulation of protein catabolic process (GO:0045732)	1/82	0.265602	0.337466	0.296052	0.378228	-0.950774	1.26049	ADAM8
positive regulation of protein secretion (GO:0050714)	1/83	0.268368	0.338177	0.299031	0.379494	-0.956426	1.25808	ADAM8
negative regulation of gene expression (GO:0010629)	4/619	0.202491	0.293803	0.266718	0.359076	-0.783388	1.25112	CAPRIN1;NONO;RIOX2;GATAD2A
nuclear export (GO:0051168)	1/93	0.295462	0.357124	0.328155	0.400821	-1.01313	1.23522	SRSF6
regulation of transcription, DNA-templated (GO:0006355)	8/1599	0.249261	0.324413	0.363644	0.426893	-0.883376	1.22723	NPM1;PCNA;NONO;RIOX2;YBX1;HNRNPAB;OGT;GATAD2A
negative regulation of translation (GO:0017148)	1/89	0.284745	0.350883	0.316651	0.393689	-0.967828	1.21575	CAPRIN1
ERAD pathway (GO:0036503)	1/78	0.254438	0.327471	0.284008	0.36757	-0.881756	1.20686	USP19
epithelium development (GO:0060429)	1/116	0.354079	0.403418	0.390697	0.445138	-1.16207	1.2065	PCNA
response to ionizing radiation (GO:0010212)	1/78	0.254438	0.327471	0.284008	0.36757	-0.876633	1.19985	RHOB
negative regulation of cellular protein metabolic process (GO:0032269)	1/90	0.287439	0.352951	0.319545	0.395871	-0.960805	1.19788	CAPRIN1
regulation of Wnt signaling pathway (GO:0030111)	1/110	0.339269	0.389095	0.374956	0.432882	-1.10731	1.19696	CDK14
intrinsic apoptotic signaling pathway (GO:0097193)	1/102	0.318999	0.374501	0.353346	0.416229	-1.0331	1.18038	SELENOK
small GTPase mediated signal transduction (GO:0007264)	1/100	0.313837	0.370317	0.347829	0.412528	-1.01794	1.17967	G3BP1
DNA repair (GO:0006281)	2/289	0.295283	0.357124	0.347257	0.412528	-0.961936	1.17339	NPM1;PCNA
positive regulation of supramolecular fiber organization (GO:1902905)	1/85	0.273868	0.34172	0.304954	0.383901	-0.905568	1.17281	CLIP1
positive regulation of programmed cell death (GO:0043068)	2/258	0.252172	0.326368	0.299227	0.379494	-0.838292	1.15487	ITGB1;RHOB
proteolysis (GO:0006508)	2/292	0.299446	0.36131	0.351857	0.415886	-0.949266	1.14465	OGT;METAP2
epithelial cell differentiation (GO:0030855)	1/97	0.306021	0.365437	0.339468	0.408183	-0.958525	1.13499	PCNA
regulation of neuron apoptotic process (GO:0043523)	1/90	0.287439	0.352951	0.319545	0.395871	-0.908415	1.13256	ADAM8
positive regulation of protein localization to membrane (GO:1905477)	1/96	0.303396	0.36418	0.336657	0.407285	-0.944036	1.12597	ITGB1
cell-cell junction assembly (GO:0007043)	1/80	0.260041	0.331612	0.290055	0.372621	-0.835493	1.12534	TLN1
positive regulation of cell growth (GO:0030307)	1/99	0.311241	0.367878	0.345054	0.410638	-0.960253	1.1208	EIF4G1
regulation of cytoskeleton organization (GO:0051493)	1/96	0.303396	0.36418	0.336657	0.407285	-0.93833	1.11916	RHOB
cellular response to molecule of bacterial origin (GO:0071219)	1/85	0.273868	0.34172	0.304954	0.383901	-0.861721	1.11602	STAP1
positive regulation of protein metabolic process (GO:0051247)	1/97	0.306021	0.365437	0.339468	0.408183	-0.931451	1.10293	EIF4G1
negative regulation of nucleic acid-templated transcription (GO:1903507)	3/445	0.233378	0.319287	0.291762	0.374122	-0.757067	1.1016	NONO;RIOX2;GATAD2A
axon development (GO:0061564)	1/95	0.300761	0.362268	0.333835	0.405621	-0.905429	1.08782	RTN4
protein import into nucleus (GO:0006606)	1/104	0.324123	0.379235	0.358816	0.421958	-0.958127	1.07946	HEATR3
regulation of protein phosphorylation (GO:0001932)	2/262	0.257734	0.32988	0.305464	0.383901	-0.793032	1.07522	NPM1;NPTN
regulation of lipid metabolic process (GO:0019216)	1/101	0.316423	0.372735	0.350593	0.415098	-0.934361	1.07515	HMGCS1
nucleotide-excision repair (GO:0006289)	1/109	0.336768	0.388149	0.372294	0.431961	-0.97839	1.06484	PCNA
positive regulation of apoptotic process (GO:0043065)	2/308	0.32158	0.376894	0.376208	0.433606	-0.933861	1.05947	ITGB1;RHOB
regulation of cell motility (GO:2000145)	1/110	0.339269	0.389095	0.374956	0.432882	-0.97672	1.0558	RHOB
positive regulation of intracellular signal transduction (GO:1902533)	3/480	0.268595	0.338177	0.332319	0.404486	-0.799976	1.05161	ITGB1;ADAM8;RTN4
regulation of acute inflammatory response (GO:0002673)	1/122	0.368562	0.414483	0.406047	0.456639	-1.04446	1.04252	ADAM8
enzyme linked receptor protein signaling pathway (GO:0007167)	1/121	0.36617	0.41313	0.403515	0.455265	-1.03434	1.03916	STAP1
regulation of protein ubiquitination (GO:0031396)	1/102	0.318999	0.374501	0.353346	0.416229	-0.902204	1.03083	OGT
negative regulation of cell motility (GO:2000146)	1/98	0.308636	0.36667	0.342266	0.40872	-0.871528	1.02456	RHOB
neutrophil activation involved in immune response (GO:0002283)	3/484	0.272666	0.34172	0.336962	0.407285	-0.783903	1.01869	EEF1A1;ADAM8;EEF2
positive regulation of protein serine/threonine kinase activity (GO:0071902)	1/119	0.361361	0.410369	0.39842	0.452454	-0.997926	1.01577	ADAM8
negative regulation of growth (GO:0045926)	1/121	0.36617	0.41313	0.403515	0.455265	-1.00759	1.01228	RTN4
cell morphogenesis involved in neuron differentiation (GO:0048667)	1/98	0.308636	0.36667	0.342266	0.40872	-0.839747	0.987201	RTN4
calcium ion transport (GO:0006816)	1/119	0.361361	0.410369	0.39842	0.452454	-0.969686	0.987023	SELENOK
regulated exocytosis (GO:0045055)	1/149	0.429867	0.466809	0.470546	0.511783	-1.15961	0.979034	TLN1
positive regulation of cell cycle process (GO:0090068)	1/108	0.334258	0.385896	0.369621	0.429577	-0.882824	0.967436	USP19
negative regulation of protein kinase activity (GO:0006469)	1/110	0.339269	0.389095	0.374956	0.432882	-0.894329	0.966737	NPM1
cell cycle G2/M phase transition (GO:0044839)	1/128	0.382724	0.424231	0.421017	0.467423	-0.983349	0.944449	CDK14
cellular response to starvation (GO:0009267)	1/108	0.334258	0.385896	0.369621	0.429577	-0.857811	0.940027	GABARAPL2
regulation of protein processing (GO:0070613)	1/129	0.385053	0.426134	0.423475	0.469403	-0.980968	0.936209	ADAM8
positive regulation of neuron differentiation (GO:0045666)	1/99	0.311241	0.367878	0.345054	0.410638	-0.801256	0.935216	NPTN
G1/S transition of mitotic cell cycle (GO:0000082)	1/106	0.329209	0.384539	0.364241	0.426893	-0.838159	0.931246	PCNA
positive regulation of cellular process (GO:0048522)	3/520	0.309558	0.367138	0.378653	0.435702	-0.781318	0.916181	NPM1;RPS9;EIF4G1
positive regulation of cellular catabolic process (GO:0031331)	1/107	0.331738	0.385896	0.366937	0.429329	-0.829602	0.91539	ADAM8
regulation of response to external stimulus (GO:0032101)	1/108	0.334258	0.385896	0.369621	0.429577	-0.829698	0.909218	METAP2
platelet degranulation (GO:0002576)	1/125	0.375682	0.420223	0.413579	0.462862	-0.927673	0.908203	TLN1
peptidyl-lysine modification (GO:0018205)	1/116	0.354079	0.403418	0.390697	0.445138	-0.874028	0.907447	PCNA
DNA metabolic process (GO:0006259)	2/315	0.331216	0.385896	0.386751	0.444284	-0.806192	0.890829	NPM1;PCNA
positive regulation of neuron projection development (GO:0010976)	1/98	0.308636	0.36667	0.342266	0.40872	-0.757079	0.890017	NPTN
negative regulation of cell growth (GO:0030308)	1/116	0.354079	0.403418	0.390697	0.445138	-0.846659	0.879031	RTN4
protein O-linked glycosylation (GO:0006493)	1/116	0.354079	0.403418	0.390697	0.445138	-0.836021	0.867987	OGT
cellular calcium ion homeostasis (GO:0006874)	1/124	0.373318	0.418477	0.411079	0.460806	-0.876782	0.863916	SELENOK
regulation of macromolecule metabolic process (GO:0060255)	1/130	0.387374	0.428021	0.425924	0.471365	-0.88364	0.838012	EIF4A1
regulation of protein secretion (GO:0050708)	1/108	0.334258	0.385896	0.369621	0.429577	-0.764523	0.837797	ADAM8
sulfur compound biosynthetic process (GO:0044272)	1/123	0.370944	0.416488	0.408568	0.458732	-0.838681	0.831724	MAT2A
cellular response to growth factor stimulus (GO:0071363)	1/140	0.410114	0.44816	0.449852	0.491583	-0.93272	0.831351	EEF1A1
intracellular protein transport (GO:0006886)	2/348	0.376084	0.420223	0.435379	0.479798	-0.847441	0.828749	NPM1;HEATR3
actin filament organization (GO:0007015)	1/121	0.36617	0.41313	0.403515	0.455265	-0.818396	0.822207	RHOB
G2/M transition of mitotic cell cycle (GO:0000086)	1/127	0.380385	0.422988	0.418548	0.466171	-0.829219	0.801499	CDK14
cellular response to hypoxia (GO:0071456)	1/133	0.394286	0.434966	0.433208	0.478663	-0.860708	0.801043	ADAM8
cytoskeleton organization (GO:0007010)	1/127	0.380385	0.422988	0.418548	0.466171	-0.828269	0.800581	TLN1
protein lipidation (GO:0006497)	1/128	0.382724	0.424231	0.421017	0.467423	-0.833422	0.800453	SELENOK
regulation of cell migration (GO:0030334)	2/317	0.333963	0.385896	0.389749	0.445138	-0.713967	0.783026	NUMB;RHOB
regulation of neuron projection development (GO:0010975)	1/120	0.36377	0.412431	0.400973	0.454611	-0.764299	0.772885	NPTN
negative regulation of multicellular organismal process (GO:0051241)	1/126	0.378038	0.421728	0.416069	0.4649	-0.758426	0.737767	SRSF6
negative regulation of cell migration (GO:0030336)	1/122	0.368562	0.414483	0.406047	0.456639	-0.737607	0.73624	RHOB
positive regulation of cytosolic calcium ion concentration (GO:0007204)	1/134	0.396572	0.436795	0.435615	0.479798	-0.793869	0.734247	NPTN
positive regulation of transferase activity (GO:0051347)	1/138	0.405634	0.444662	0.445146	0.487975	-0.812715	0.733316	SERINC1
response to lipopolysaccharide (GO:0032496)	1/156	0.444778	0.481496	0.486111	0.527886	-0.879679	0.712699	STAP1
regulation of small GTPase mediated signal transduction (GO:0051056)	1/141	0.412342	0.449887	0.45219	0.493362	-0.790462	0.700272	RHOB
cellular protein complex assembly (GO:0043623)	1/145	0.42117	0.458798	0.461445	0.502671	-0.808097	0.698776	RTN4
regulation of primary metabolic process (GO:0080090)	1/140	0.410114	0.44816	0.449852	0.491583	-0.767812	0.684366	HMGCS1
axon guidance (GO:0007411)	1/159	0.45105	0.487527	0.492643	0.534145	-0.854624	0.680432	ALCAM
muscle contraction (GO:0006936)	1/138	0.405634	0.444662	0.445146	0.487975	-0.741021	0.668626	TLN1
regulation of cytosolic calcium ion concentration (GO:0051480)	1/138	0.405634	0.444662	0.445146	0.487975	-0.737949	0.665854	NPTN
positive regulation of protein phosphorylation (GO:0001934)	2/413	0.46057	0.496273	0.524854	0.563792	-0.804375	0.623624	NPTN;EIF4G1
mitochondrion organization (GO:0007005)	1/168	0.469449	0.504277	0.511752	0.551423	-0.816943	0.617769	EIF4G1
receptor-mediated endocytosis (GO:0006898)	1/189	0.510048	0.542853	0.553632	0.58924	-0.893137	0.601305	ITGB1
negative regulation of protein phosphorylation (GO:0001933)	1/179	0.491112	0.525112	0.534149	0.571129	-0.807944	0.574515	EIF4G1
positive regulation of MAP kinase activity (GO:0043406)	1/178	0.48918	0.52466	0.532156	0.570754	-0.769255	0.550037	ADAM8
regulation of cellular macromolecule biosynthetic process (GO:2000112)	3/632	0.424156	0.461327	0.503663	0.544395	-0.6338	0.543582	RBM3;NONO;YBX1
negative regulation of programmed cell death (GO:0043069)	2/409	0.455553	0.491629	0.519618	0.559032	-0.681821	0.536077	NPM1;HYPK
protein complex assembly (GO:0006461)	1/190	0.511902	0.543994	0.555535	0.590362	-0.787074	0.527041	NPM1
regulation of GTPase activity (GO:0043087)	1/189	0.510048	0.542853	0.553632	0.58924	-0.763009	0.513697	ITGB1
positive regulation of cell motility (GO:2000147)	1/180	0.493038	0.526362	0.536135	0.572371	-0.719457	0.508778	NUMB
protein modification by small protein conjugation (GO:0032446)	2/399	0.442896	0.480207	0.506366	0.546467	-0.615927	0.501623	PCNA;NOSIP
positive regulation of protein modification process (GO:0031401)	1/164	0.461348	0.496342	0.503348	0.544395	-0.643835	0.498073	NPTN
positive regulation of GTPase activity (GO:0043547)	1/193	0.517426	0.548187	0.561198	0.59547	-0.754014	0.496812	ITGB1
positive regulation of phosphorylation (GO:0042327)	1/209	0.545857	0.575676	0.590222	0.623411	-0.815725	0.493839	NPTN
cellular response to lipid (GO:0071396)	1/179	0.491112	0.525112	0.534149	0.571129	-0.688131	0.489318	STAP1
regulation of gene expression (GO:0010468)	4/1038	0.550354	0.579539	0.647574	0.673749	-0.778301	0.464797	EIF4A1;NONO;STAP1;YBX1
regulation of canonical Wnt signaling pathway (GO:0060828)	1/214	0.554398	0.582914	0.598899	0.631616	-0.74983	0.442304	CDK14
positive regulation of nucleic acid-templated transcription (GO:1903508)	2/503	0.566029	0.593348	0.632518	0.661053	-0.760062	0.432559	NPM1;HNRNPAB
positive regulation of signal transduction (GO:0009967)	1/207	0.542395	0.572895	0.5867	0.620634	-0.688344	0.421101	NPTN
regulation of cell cycle (GO:0051726)	1/216	0.55777	0.585574	0.602319	0.63426	-0.719322	0.419947	RHOB
axonogenesis (GO:0007409)	1/224	0.571007	0.595871	0.615714	0.645431	-0.735554	0.412171	RTN4
inflammatory response (GO:0006954)	1/253	0.615797	0.636873	0.660652	0.685304	-0.819139	0.39715	ADAM8
regulation of signal transduction (GO:0009966)	1/234	0.587005	0.611647	0.631834	0.661053	-0.733107	0.390542	OGT
mitotic cell cycle phase transition (GO:0044772)	1/222	0.567735	0.594241	0.612407	0.642976	-0.686288	0.388508	CDK14
regulation of cell proliferation (GO:0042127)	3/741	0.529334	0.55995	0.612447	0.642976	-0.600157	0.381781	NPM1;RPS9;EIF4G1
positive regulation of transcription from RNA polymerase II promoter (GO:0045944)	3/849	0.62255	0.6429	0.703857	0.72364	-0.785905	0.372466	NPM1;YBX1;OGT
cellular response to cytokine stimulus (GO:0071345)	2/457	0.513966	0.545354	0.579947	0.614426	-0.556485	0.370395	ITGB1;TXLNA
anterograde trans-synaptic signaling (GO:0098916)	1/241	0.597852	0.621087	0.642721	0.669702	-0.706208	0.363282	SLC12A4
positive regulation of macromolecule metabolic process (GO:0010604)	1/277	0.649349	0.666614	0.6939	0.71446	-0.792102	0.342018	STAP1
regulation of programmed cell death (GO:0043067)	1/269	0.638499	0.658393	0.68319	0.706573	-0.757387	0.33979	RTN4
negative regulation of transcription, DNA-templated (GO:0045892)	3/814	0.593714	0.617711	0.676106	0.700289	-0.649528	0.338637	NONO;RIOX2;GATAD2A
protein ubiquitination (GO:0016567)	2/507	0.570367	0.595871	0.636845	0.664576	-0.592996	0.332953	PCNA;NOSIP
regulation of immune response (GO:0050776)	1/252	0.614332	0.636305	0.659193	0.684811	-0.681084	0.331837	ITGB1
protein transport (GO:0015031)	1/327	0.710239	0.721661	0.753212	0.765632	-0.939709	0.321525	NPM1
regulation of nucleic acid-templated transcription (GO:1903506)	2/608	0.669665	0.68243	0.733488	0.747469	-0.786165	0.315234	NONO;YBX1
positive regulation of transcription, DNA-templated (GO:0045893)	4/1121	0.612137	0.634978	0.707194	0.725997	-0.630771	0.309581	NPM1;YBX1;HNRNPAB;OGT
Golgi vesicle transport (GO:0048193)	1/272	0.642606	0.661647	0.687249	0.709715	-0.691874	0.305962	GABARAPL2
cellular response to oxygen-containing compound (GO:1901701)	1/275	0.646667	0.664843	0.691256	0.712794	-0.695559	0.303211	STAP1
chemical synaptic transmission (GO:0007268)	1/290	0.666298	0.680996	0.710549	0.726223	-0.708754	0.287767	SLC12A4
ion transport (GO:0006811)	1/290	0.666298	0.680996	0.710549	0.726223	-0.683589	0.277549	SLC12A4
proteasome-mediated ubiquitin-dependent protein catabolic process (GO:0043161)	1/292	0.668833	0.68243	0.71303	0.727689	-0.662657	0.266534	USP19
cytokine-mediated signaling pathway (GO:0019221)	2/634	0.692079	0.704238	0.754616	0.765632	-0.718701	0.264522	ITGB1;TXLNA
cellular response to DNA damage stimulus (GO:0006974)	1/330	0.71354	0.722901	0.756386	0.76631	-0.755055	0.254844	NPM1
positive regulation of MAPK cascade (GO:0043410)	1/290	0.666298	0.680996	0.710549	0.726223	-0.601322	0.244147	ADAM8
negative regulation of cell proliferation (GO:0008285)	1/364	0.74846	0.757176	0.789674	0.79887	-0.785899	0.227704	NPM1
cellular protein localization (GO:0034613)	1/328	0.711343	0.721728	0.754274	0.765632	-0.666874	0.227138	NPM1
regulation of intracellular signal transduction (GO:1902531)	1/423	0.799366	0.803993	0.837146	0.841992	-0.831168	0.186129	RHOB
transmembrane receptor protein tyrosine kinase signaling pathway (GO:0007169)	1/397	0.778325	0.785103	0.817689	0.82481	-0.711827	0.178392	STAP1
vesicle-mediated transport (GO:0016192)	1/411	0.789911	0.795635	0.828434	0.834437	-0.687652	0.162172	RHOB
phosphorylation (GO:0016310)	1/387	0.769665	0.777496	0.809612	0.817849	-0.585766	0.153354	CDK14
regulation of transcription from RNA polymerase II promoter (GO:0006357)	4/1479	0.81476	0.818292	0.883028	0.885577	-0.53894	0.110408	NPM1;YBX1;OGT;GATAD2A
protein phosphorylation (GO:0006468)	1/471	0.833162	0.835567	0.867848	0.871611	-0.598317	0.109209	CDK14
cellular protein modification process (GO:0006464)	2/1002	0.895501	0.895501	0.930937	0.930937	-0.730087	0.0805811	CDK14;METAP2
negative regulation of transcription from RNA polymerase II promoter (GO:0000122)	1/566	0.884347	0.885622	0.912785	0.914101	-0.534239	0.0656608	GATAD2A

## Sheet: M0 up
Term	Overlap	P-value	Adjusted P-value	Old P-value	Old Adjusted P-value	Z-score	Combined Score	Genes
cellular macromolecule biosynthetic process (GO:0034645)	23/368	4.24117e-13	2.78857e-10	6.80198e-11	3.04195e-08	-1.76142	50.1808	GTF3C2;RPL3;GTF3C6;RPL11;RPS6;RPA1;RPL23A;GTPBP1;SIRT1;RPL6;POLA1;RPL7A;HELB;RPL27A;CDK2;RPL37A;CDK1;PCLAF;MCM4;HARS;TOPBP1;PTMA;MCM2
mRNA splicing, via spliceosome (GO:0000398)	19/262	3.92605e-12	9.56183e-10	3.41906e-10	8.99212e-08	-1.74661	45.8719	HNRNPA3;CPSF2;SRSF1;PRPF40A;U2AF1;HTATSF1;PQBP1;SRRM1;HNRNPL;LSM8;SFPQ;PRPF6;PSPC1;SRSF2;PRPF31;DNAJC8;SNRNP200;SRSF6;CTNNBL1
DNA metabolic process (GO:0006259)	22/315	1.52043e-13	1.99937e-10	2.449e-11	3.04195e-08	-1.36365	40.2475	PRIM2;WDHD1;PCNA;LIG1;UHRF2;HMGB2;RPA1;HMGB3;SIRT1;TSN;POLA1;HELB;MSH2;TRIM28;CDK2;CDK1;PCLAF;MCM4;TK1;TOPBP1;RAN;MCM2
mRNA processing (GO:0006397)	20/284	1.77753e-12	5.84362e-10	1.84556e-10	6.06728e-08	-1.47515	39.9113	HNRNPA3;CPSF2;SRSF1;PRPF40A;U2AF1;HTATSF1;PQBP1;SRRM1;HNRNPL;LSM8;SFPQ;PRPF6;SON;PSPC1;SRSF2;PRPF31;DNAJC8;SNRNP200;SRSF6;CTNNBL1
viral process (GO:0016032)	16/221	2.16768e-10	4.07214e-08	9.39617e-09	1.76514e-06	-1.68816	37.5653	RPL3;NUP155;RPL11;RPS6;RPL23A;DEK;HTATSF1;RPL6;RPL7A;GRK2;NUP50;RPL27A;RPL37A;ELMO1;RAN;AP1M1
RNA splicing, via transesterification reactions with bulged adenosine as nucleophile (GO:0000377)	19/237	6.6143e-13	2.89927e-10	6.93982e-11	3.04195e-08	-1.26693	35.5302	HNRNPA3;CPSF2;SRSF1;PRPF40A;U2AF1;HTATSF1;PQBP1;SRRM1;HNRNPL;LSM8;SFPQ;PRPF6;PSPC1;SRSF2;PRPF31;DNAJC8;SNRNP200;SRSF6;CTNNBL1
gene expression (GO:0010467)	23/412	4.36281e-12	9.56183e-10	5.58858e-10	1.22483e-07	-1.25388	32.7988	GTF3C2;RPL3;NUP155;GTF3C6;CPSF2;RPL11;RPS6;SRSF1;RPL23A;U2AF1;RPL6;SRRM1;HNRNPL;DDX19A;RPL7A;HELB;NUP50;RPL27A;RPL37A;SRSF2;HARS;SRSF6;PTMA
alternative mRNA splicing, via spliceosome (GO:0000380)	4/13	4.54702e-06	0.000246561	3.18515e-05	0.00167539	-2.46447	30.3155	SFPQ;SRSF1;SRSF6;PQBP1
viral transcription (GO:0019083)	10/114	9.61729e-08	1.26467e-05	1.25159e-06	0.000164584	-1.78153	28.7844	RPL7A;RPL3;NUP155;NUP50;RPL27A;RPL11;RPL37A;RPS6;RPL23A;RPL6
DNA replication (GO:0006260)	11/121	1.48517e-08	2.44126e-06	2.59636e-07	4.26777e-05	-1.54941	27.9284	POLA1;WDHD1;HELB;CDK2;CDK1;PCLAF;RPA1;MCM4;TOPBP1;SIRT1;MCM2
protein targeting to ER (GO:0045047)	8/98	3.28835e-06	0.000188008	2.42932e-05	0.00145207	-2.05687	25.9682	RPL7A;RPL3;RPL27A;RPL11;RPL37A;RPS6;RPL23A;RPL6
viral gene expression (GO:0019080)	10/111	7.45739e-08	1.08961e-05	9.98675e-07	0.000145918	-1.57626	25.8687	RPL7A;RPL3;NUP155;NUP50;RPL27A;RPL11;RPL37A;RPS6;RPL23A;RPL6
mRNA-containing ribonucleoprotein complex export from nucleus (GO:0071427)	9/101	3.74024e-07	4.09868e-05	3.83649e-06	0.000420415	-1.73557	25.6845	DDX19A;NUP155;NUP50;CPSF2;SRSF1;SRSF2;U2AF1;SRSF6;SRRM1
SRP-dependent cotranslational protein targeting to membrane (GO:0006614)	8/90	1.72368e-06	0.000124333	1.36695e-05	0.000998636	-1.82252	24.1868	RPL7A;RPL3;RPL27A;RPL11;RPL37A;RPS6;RPL23A;RPL6
regulation of ubiquitin protein ligase activity (GO:1904666)	6/37	9.9291e-07	7.73992e-05	7.6612e-06	0.000629655	-1.68067	23.2313	UBE2C;CDK2;PLK1;RPL11;CDK1;MAD2L1
nuclear-transcribed mRNA catabolic process, nonsense-mediated decay (GO:0000184)	8/113	9.51722e-06	0.000417171	6.29273e-05	0.00285343	-1.96629	22.7351	RPL7A;RPL3;RPL27A;RPL11;RPL37A;RPS6;RPL23A;RPL6
protein localization to nuclear envelope (GO:0090435)	2/7	0.0016966	0.0197437	0.00423824	0.0502098	-3.55871	22.7014	NUP155;PLK1
protein localization to kinetochore (GO:0034501)	3/13	0.000201455	0.00401384	0.000688061	0.0143619	-2.61631	22.2646	IK;RCC2;CDK1
DNA-dependent DNA replication (GO:0006261)	7/57	8.60266e-07	7.54167e-05	6.9302e-06	0.000607548	-1.54545	21.5838	POLA1;PRIM2;WDHD1;HELB;RPA1;TOPBP1;MCM2
rRNA metabolic process (GO:0016072)	10/201	1.68394e-05	0.000632678	0.000129846	0.00461481	-1.89493	20.8287	RPL7A;RPL3;RPL27A;RPL11;RPL37A;RPS6;NOC4L;RPL23A;WDR12;RPL6
rRNA processing (GO:0006364)	11/203	2.79161e-06	0.000166862	2.84423e-05	0.00162616	-1.59779	20.4339	RPL7A;RPL3;RPL27A;RPL11;RPL37A;RPS6;NOC4L;RPL23A;WDR12;RPL6;SKIV2L2
histone H3 deacetylation (GO:0070932)	3/13	0.000201455	0.00401384	0.000688061	0.0143619	-2.28942	19.4829	HDAC2;SFPQ;SIRT1
RNA export from nucleus (GO:0006405)	10/120	1.56443e-07	1.8702e-05	1.92949e-06	0.000230662	-1.22984	19.2723	DDX19A;NUP155;NUP50;CPSF2;SRSF1;SRSF2;U2AF1;SRSF6;RAN;SRRM1
peptide biosynthetic process (GO:0043043)	9/175	3.45529e-05	0.00116505	0.000223651	0.00735253	-1.87007	19.2113	RPL7A;RPL3;RPL27A;RPL11;RPL37A;RPS6;RPL23A;HARS;RPL6
DNA replication initiation (GO:0006270)	4/25	7.38241e-05	0.00196746	0.000286336	0.00841635	-1.99785	19.0072	POLA1;PRIM2;TOPBP1;MCM2
ncRNA processing (GO:0034470)	10/228	4.93774e-05	0.00156628	0.000343269	0.00940413	-1.86964	18.5393	RPL7A;RPL3;RPL27A;RPL11;RPL37A;RPS6;NOC4L;RPL23A;WDR12;RPL6
DNA repair (GO:0006281)	12/289	1.4978e-05	0.000579296	0.000144014	0.00498364	-1.66883	18.5389	POLA1;WDHD1;PCNA;LIG1;MSH2;TRIM28;CDK1;HMGB2;RPA1;TOPBP1;RAD23B;SIRT1
RNA metabolic process (GO:0016070)	9/192	7.10244e-05	0.00194577	0.000429103	0.0106466	-1.93175	18.453	HNRNPL;DDX19A;LSM8;POLA1;HELB;HNRNPA3;PCNA;LIG1;SKIV2L2
DNA strand elongation involved in DNA replication (GO:0006271)	3/17	0.000466241	0.00771099	0.00135552	0.0231494	-2.40159	18.4222	POLA1;PCNA;LIG1
5S class rRNA transcription from RNA polymerase III type 1 promoter (GO:0042791)	2/7	0.0016966	0.0197437	0.00423824	0.0502098	-2.8767	18.3509	GTF3C2;GTF3C6
regulation of mitotic cell cycle phase transition (GO:1901990)	9/185	5.33064e-05	0.00159314	0.000331026	0.00926167	-1.85827	18.2843	UBE2C;CDK2;PLK1;CDK1;PSMD1;BUB3;MAPRE1;TUBB4B;MAD2L1
DNA replication-dependent nucleosome assembly (GO:0006335)	3/11	0.000117804	0.00271776	0.000454643	0.0107379	-2.01995	18.2735	CHAF1B;CHAF1A;ASF1B
tRNA transcription (GO:0009304)	2/8	0.00224854	0.0244366	0.00525907	0.0601364	-2.96813	18.0981	GTF3C2;GTF3C6
purine nucleobase biosynthetic process (GO:0009113)	2/7	0.0016966	0.0197437	0.00423824	0.0502098	-2.80803	17.9128	MTHFD1L;PAICS
RNA splicing (GO:0008380)	7/107	5.77843e-05	0.00168859	0.000288012	0.00841635	-1.82855	17.8445	DDX19A;SFPQ;PRPF6;SRSF2;U2AF1;TARDBP;SRRM1
positive regulation of ubiquitin protein ligase activity (GO:1904668)	6/83	0.000113821	0.00271776	0.000478606	0.0110415	-1.96487	17.8428	UBE2C;PLK1;CDK1;PSMD1;BUB3;MAD2L1
cotranslational protein targeting to membrane (GO:0006613)	8/94	2.39949e-06	0.000150254	1.83438e-05	0.00119604	-1.35724	17.563	RPL7A;RPL3;RPL27A;RPL11;RPL37A;RPS6;RPL23A;RPL6
mismatch repair (GO:0006298)	4/33	0.000225546	0.00429845	0.000742837	0.0150282	-2.08141	17.4776	PCNA;LIG1;MSH2;RPA1
ribosomal large subunit assembly (GO:0000027)	4/31	0.000175924	0.00373129	0.000599212	0.0133553	-2.01676	17.4358	RPL3;RPL11;RPL23A;RPL6
mRNA transport (GO:0051028)	9/105	5.21606e-07	5.27624e-05	5.1557e-06	0.000520415	-1.20139	17.3797	DDX19A;NUP155;NUP50;CPSF2;SRSF1;SRSF2;U2AF1;SRSF6;SRRM1
mRNA export from nucleus (GO:0006406)	9/106	5.65554e-07	5.31217e-05	5.54054e-06	0.000520415	-1.20589	17.3473	DDX19A;NUP155;NUP50;CPSF2;SRSF1;SRSF2;U2AF1;SRSF6;SRRM1
regulation of metaphase/anaphase transition of cell cycle (GO:1902099)	2/9	0.00287361	0.0286272	0.00638082	0.0671262	-2.95935	17.3187	UBE2C;PLK1
RNA processing (GO:0006396)	11/194	1.79645e-06	0.000124333	1.91003e-05	0.00119604	-1.30397	17.2511	HNRNPL;DDX19A;HELB;SFPQ;PRPF6;SON;SRSF1;SRSF2;U2AF1;TARDBP;SRRM1
nuclear export (GO:0051168)	8/93	2.2124e-06	0.000145466	1.70652e-05	0.00118109	-1.32164	17.2097	NUP155;CSE1L;SRSF1;SRSF2;U2AF1;SRSF6;RAN;SRRM1
chromatin assembly or disassembly (GO:0006333)	3/14	0.000254674	0.00471685	0.000828678	0.0160252	-2.0724	17.1502	CHAF1B;CHAF1A;HIRIP3
nucleosome assembly (GO:0006334)	5/61	0.000238584	0.00448196	0.000842862	0.0160632	-1.98712	16.5742	CHAF1B;CHAF1A;ANP32E;HMGB2;ASF1B
sister chromatid segregation (GO:0000819)	4/33	0.000225546	0.00429845	0.000742837	0.0150282	-1.96746	16.5208	PLK1;NUSAP1;SMC4;RAN
regulation of protein localization to cell cortex (GO:1904776)	2/7	0.0016966	0.0197437	0.00423824	0.0502098	-2.58303	16.4774	NUMA1;EPB41
regulation of ubiquitin-protein ligase activity involved in mitotic cell cycle (GO:0051439)	7/73	4.68748e-06	0.000246561	3.05195e-05	0.00167222	-1.33734	16.41	UBE2C;CDK2;PLK1;CDK1;PSMD1;BUB3;MAD2L1
negative regulation of ubiquitin protein ligase activity (GO:1904667)	7/78	7.3139e-06	0.000356214	4.52588e-05	0.00220427	-1.36162	16.1022	UBE2C;CDK2;RPL11;CDK1;PSMD1;BUB3;MAD2L1
positive regulation of protein ubiquitination involved in ubiquitin-dependent protein catabolic process (GO:2000060)	6/88	0.000157375	0.00350759	0.00064062	0.0138101	-1.83024	16.0272	UBE2C;PLK1;CDK1;PSMD1;BUB3;MAD2L1
mitotic cell cycle phase transition (GO:0044772)	12/222	1.0006e-06	7.73992e-05	1.25061e-05	0.000967383	-1.15926	16.0151	POLA1;PRIM2;UBE2C;CDK2;PLK1;CDK1;RPA1;MCM4;MAPRE1;TUBB4B;MCM2;PHF8
regulation of methylation-dependent chromatin silencing (GO:0090308)	2/10	0.00357045	0.0330643	0.00760111	0.073496	-2.78389	15.6874	TRIM28;UHRF2
regulation of MHC class II biosynthetic process (GO:0045346)	2/9	0.00287361	0.0286272	0.00638082	0.0671262	-2.65065	15.5121	HDAC2;SIRT1
mitotic nuclear division (GO:0140014)	5/75	0.000624389	0.00933036	0.00200084	0.0295629	-2.09784	15.4794	UBE2C;PLK1;NUSAP1;SMC4;RAN
positive regulation of chromosome segregation (GO:0051984)	2/12	0.00517404	0.0433367	0.0103281	0.0887681	-2.92895	15.4183	NUMA1;RCC2
mitotic sister chromatid segregation (GO:0000070)	7/83	1.1061e-05	0.000469202	6.53874e-05	0.00286615	-1.34806	15.3842	PRC1;PLK1;NUSAP1;KIF2C;SMC4;RAN;SMC2
RNA transport (GO:0050658)	6/81	9.93542e-05	0.00241946	0.000423591	0.0106466	-1.66763	15.3702	NUP155;SRSF1;SRSF2;U2AF1;SRSF6;SRRM1
positive regulation of response to DNA damage stimulus (GO:2001022)	4/50	0.00112476	0.0146442	0.00307123	0.0412108	-2.26238	15.362	BCLAF1;PCNA;TRIM28;SIRT1
cellular response to DNA damage stimulus (GO:0006974)	13/330	1.15177e-05	0.000473306	0.000125917	0.00461481	-1.32243	15.0382	WDHD1;LIG1;RPA1;NFATC2;SIRT1;POLA1;HELB;HPF1;MSH2;TRIM28;CDK1;PCLAF;TOPBP1
DNA replication-dependent nucleosome organization (GO:0034723)	3/11	0.000117804	0.00271776	0.000454643	0.0107379	-1.64652	14.8952	CHAF1B;CHAF1A;ASF1B
regulation of chromosome segregation (GO:0051983)	4/30	0.000154321	0.00349884	0.000535352	0.0121377	-1.68609	14.7979	CSNK2A1;NUMA1;KIF2C;MKI67
negative regulation of ubiquitin-protein ligase activity involved in mitotic cell cycle (GO:0051436)	6/72	5.11939e-05	0.00156628	0.00023397	0.00750415	-1.49535	14.7739	UBE2C;CDK2;CDK1;PSMD1;BUB3;MAD2L1
establishment of protein localization to organelle (GO:0072594)	4/63	0.00265319	0.02769	0.0066569	0.0683892	-2.46432	14.6183	NUP155;CSE1L;NUP50;RAN
mitotic spindle checkpoint (GO:0071174)	3/18	0.000555735	0.00849757	0.00156855	0.0254647	-1.94996	14.6154	IK;PLK1;BUB3
regulation of cellular response to heat (GO:1900034)	7/79	7.96353e-06	0.000368825	4.88117e-05	0.00229241	-1.24203	14.5822	NUP155;NUP50;BAG1;RPA1;EP300;MAPK1;SIRT1
ribosomal large subunit biogenesis (GO:0042273)	6/64	2.60978e-05	0.00090312	0.00012853	0.00461481	-1.38151	14.58	RPL7A;RPL3;RPL11;RPL23A;WDR12;RPL6
mitotic spindle assembly checkpoint (GO:0007094)	3/18	0.000555735	0.00849757	0.00156855	0.0254647	-1.94151	14.552	IK;PLK1;BUB3
spindle assembly checkpoint (GO:0071173)	3/18	0.000555735	0.00849757	0.00156855	0.0254647	-1.937	14.5182	IK;PLK1;BUB3
DNA ligation (GO:0006266)	3/19	0.000655508	0.00957769	0.00180141	0.0275449	-1.97751	14.4953	PCNA;LIG1;HMGB2
tRNA transcription from RNA polymerase III promoter (GO:0042797)	2/7	0.0016966	0.0197437	0.00423824	0.0502098	-2.26952	14.4775	GTF3C2;GTF3C6
mitotic chromosome condensation (GO:0007076)	3/16	0.000386559	0.00677767	0.00116167	0.020867	-1.84117	14.4683	NUSAP1;SMC4;SMC2
G1/S transition of mitotic cell cycle (GO:0000082)	8/106	5.92218e-06	0.000299526	4.11126e-05	0.00207935	-1.17957	14.1982	POLA1;PRIM2;PCNA;CDK2;RPA1;MCM4;MCM2;PHF8
nuclear envelope disassembly (GO:0051081)	4/47	0.000889873	0.0123177	0.00249042	0.0355968	-1.99695	14.0275	NUP155;NUP50;PLK1;CDK1
ribosome biogenesis (GO:0042254)	11/227	8.13378e-06	0.000368825	7.47623e-05	0.00317137	-1.19339	13.9859	RPL7A;RPL3;RPL27A;RPL11;RPL37A;RPS6;NOC4L;RPL23A;WDR12;RAN;RPL6
chromatin remodeling (GO:0006338)	6/117	0.000730227	0.0105522	0.00256649	0.0362896	-1.93156	13.95	HDAC2;ANP32E;HMGB2;HMGB3;DEK;NPM3
nucleic acid metabolic process (GO:0090304)	6/81	9.93542e-05	0.00241946	0.000423591	0.0106466	-1.51227	13.9383	HNRNPL;LSM8;HNRNPA3;TK1;TOPBP1;RAN
regulation of oxidative stress-induced intrinsic apoptotic signaling pathway (GO:1902175)	3/19	0.000655508	0.00957769	0.00180141	0.0275449	-1.89999	13.9271	SFPQ;SIRT1;SOD1
RNA 3'-end processing (GO:0031123)	6/62	2.17248e-05	0.000793558	0.000109283	0.00435477	-1.29153	13.8672	CPSF2;SRSF1;SRSF2;U2AF1;SRSF6;SRRM1
regulation of cellular response to stress (GO:0080135)	7/105	5.12169e-05	0.00156628	0.00025834	0.00808849	-1.39818	13.8132	NUP155;NUP50;BAG1;RPA1;EP300;MAPK1;SIRT1
ribonucleoprotein complex assembly (GO:0022618)	9/157	1.46113e-05	0.000579296	0.000102725	0.00422135	-1.22319	13.6187	PRPF6;RPL3;RPL11;SRSF1;CIRBP;RPL23A;SNRNP200;SRSF6;RPL6
positive regulation of ubiquitin-protein ligase activity involved in regulation of mitotic cell cycle transition (GO:0051437)	6/77	7.48082e-05	0.00196746	0.000328424	0.00926167	-1.4277	13.5639	UBE2C;PLK1;CDK1;PSMD1;BUB3;MAD2L1
chromosome organization (GO:0051276)	5/57	0.000172946	0.00373129	0.000632536	0.0138101	-1.56114	13.5234	HDAC2;MSH2;NUP155;RAD23B;SIRT1
positive regulation of oxidative stress-induced cell death (GO:1903209)	2/7	0.0016966	0.0197437	0.00423824	0.0502098	-2.11833	13.5131	SFPQ;SOD1
anaphase-promoting complex-dependent catabolic process (GO:0031145)	6/80	9.26915e-05	0.00238999	0.000398005	0.0106409	-1.43758	13.3497	UBE2C;PLK1;CDK1;PSMD1;BUB3;MAD2L1
termination of RNA polymerase II transcription (GO:0006369)	6/69	4.01801e-05	0.00132092	0.000188537	0.00635708	-1.31785	13.3395	CPSF2;SRSF1;SRSF2;U2AF1;SRSF6;SRRM1
lagging strand elongation (GO:0006273)	2/9	0.00287361	0.0286272	0.00638082	0.0671262	-2.26295	13.2432	POLA1;LIG1
mRNA 3'-end processing (GO:0031124)	6/75	6.45e-05	0.00180463	0.00028761	0.00841635	-1.37233	13.2414	CPSF2;SRSF1;SRSF2;U2AF1;SRSF6;SRRM1
intrinsic apoptotic signaling pathway in response to DNA damage by p53 class mediator (GO:0042771)	3/21	0.000887693	0.0123177	0.00232918	0.0336579	-1.88062	13.2149	MSH2;EP300;SIRT1
negative regulation of microtubule polymerization (GO:0031115)	2/10	0.00357045	0.0330643	0.00760111	0.073496	-2.33986	13.1853	STMN1;MAPRE1
regulation of cell cycle process (GO:0010564)	6/91	0.00018924	0.00395001	0.000756457	0.0150718	-1.50109	12.8681	CSNK2A1;NUMA1;PRC1;PLK1;PRPF40A;MKI67
negative regulation of microtubule polymerization or depolymerization (GO:0031111)	3/28	0.00208615	0.0232481	0.00488572	0.0563573	-2.07459	12.8053	STMN1;ARHGEF2;MAPRE1
negative regulation of ubiquitin-protein transferase activity (GO:0051444)	2/14	0.00704872	0.0543529	0.0134221	0.108951	-2.58205	12.7938	RPL11;MAD2L1
regulation of G2/M transition of mitotic cell cycle (GO:0010389)	7/150	0.000469109	0.00771099	0.001914	0.0286012	-1.66576	12.7675	RCC2;CDK2;PLK1;CDK1;PSMD1;MAPRE1;TUBB4B
protein localization to nucleus (GO:0034504)	6/97	0.00026815	0.00489746	0.00103619	0.0190658	-1.55218	12.7651	NUP155;CSE1L;NUP50;PLK1;RPL11;RAN
cell cycle G1/S phase transition (GO:0044843)	7/93	2.33731e-05	0.000830693	0.000127632	0.00461481	-1.18386	12.6246	POLA1;PRIM2;CDK2;RPA1;MCM4;MCM2;PHF8
peptidyl-lysine modification (GO:0018205)	7/116	9.64427e-05	0.00241946	0.000457278	0.0107379	-1.36119	12.5864	PCNA;NUP155;TRIM28;NUP50;EP300;SAE1;SIRT1
protein sumoylation (GO:0016925)	5/69	0.000424918	0.00725671	0.00141444	0.023846	-1.6096	12.4963	PCNA;NUP155;TRIM28;NUP50;SAE1
regulation of DNA repair (GO:0006282)	4/38	0.000392615	0.00679328	0.0012056	0.0211382	-1.5801	12.3923	PCNA;TRIM28;DEK;SIRT1
positive regulation of cell cycle G2/M phase transition (GO:1902751)	2/18	0.0115705	0.0792455	0.0206418	0.145935	-2.73696	12.2049	RCC2;CDK1
DNA ligation involved in DNA repair (GO:0051103)	2/13	0.00607814	0.0490353	0.0118304	0.0984617	-2.39084	12.2006	LIG1;HMGB2
positive regulation of G2/M transition of mitotic cell cycle (GO:0010971)	2/17	0.0103466	0.0727581	0.0187132	0.137474	-2.63147	12.0287	RCC2;CDK1
regulation of cell division (GO:0051302)	4/66	0.00314285	0.0303946	0.00776121	0.0739564	-2.06162	11.8804	PRC1;PLK1;PRPF40A;EVI2B
protein-DNA complex assembly (GO:0065004)	6/92	0.000200923	0.00401384	0.000798462	0.0156713	-1.38555	11.7946	CHAF1B;CHAF1A;ANP32E;HMGB2;RPA1;RAD23B
positive regulation of nuclease activity (GO:0032075)	2/11	0.0043377	0.0377753	0.00891765	0.082002	-2.16377	11.7718	PCNA;HMGB2
regulation of chromatin silencing (GO:0031935)	2/12	0.00517404	0.0433367	0.0103281	0.0887681	-2.22097	11.6914	UHRF2;SIRT1
translation (GO:0006412)	10/233	5.92373e-05	0.00169341	0.000404596	0.0106409	-1.19611	11.6429	RPL7A;RPL3;RPL27A;RPL11;RPL37A;RPS6;RPL23A;HARS;GTPBP1;RPL6
chromosome condensation (GO:0030261)	3/24	0.00132393	0.0165807	0.00328459	0.0429482	-1.73616	11.5058	NUSAP1;SMC4;SMC2
purine nucleobase metabolic process (GO:0006144)	2/12	0.00517404	0.0433367	0.0103281	0.0887681	-2.1756	11.4526	MTHFD1L;PAICS
regulation of signal transduction by p53 class mediator (GO:1901796)	7/139	0.00029597	0.00533151	0.00126122	0.0218225	-1.40034	11.3781	HDAC2;CSNK2A1;CDK2;RPL11;RPA1;EP300;TOPBP1
protein localization to chromosome, centromeric region (GO:0071459)	2/16	0.0091842	0.0670957	0.0168656	0.128198	-2.41694	11.3361	IK;CDK1
nucleotide-excision repair, DNA gap filling (GO:0006297)	3/24	0.00132393	0.0165807	0.00328459	0.0429482	-1.68581	11.1721	PCNA;LIG1;RPA1
spliceosomal tri-snRNP complex assembly (GO:0000244)	2/13	0.00607814	0.0490353	0.0118304	0.0984617	-2.17484	11.0983	PRPF6;PRPF31
DNA-templated transcription, termination (GO:0006353)	6/107	0.000454872	0.00766868	0.00167138	0.0268032	-1.43461	11.04	CPSF2;SRSF1;SRSF2;U2AF1;SRSF6;SRRM1
positive regulation of cell cycle arrest (GO:0071158)	5/83	0.00099043	0.01329	0.00303638	0.0411632	-1.59577	11.0386	PCNA;UHRF2;CDK2;CDK1;EP300
positive regulation of type I interferon production (GO:0032481)	4/63	0.00265319	0.02769	0.0066569	0.0683892	-1.84424	10.94	EP300;STAT6;LRRFIP1;PQBP1
regulation of mitotic sister chromatid separation (GO:0010965)	2/16	0.0091842	0.0670957	0.0168656	0.128198	-2.33016	10.9291	UBE2C;PLK1
regulation of cell cycle (GO:0051726)	9/216	0.000173722	0.00373129	0.000962822	0.0180873	-1.26226	10.9287	SON;UHRF2;PLK1;CDK1;PCLAF;EP300;TARDBP;CDK11B;SIRT1
mitotic nuclear envelope disassembly (GO:0007077)	4/45	0.000753985	0.0107771	0.00214822	0.0313879	-1.51991	10.9283	NUP155;NUP50;PLK1;CDK1
nucleotide-excision repair (GO:0006289)	6/109	0.000502081	0.00805166	0.00182774	0.0276262	-1.42418	10.8191	PCNA;LIG1;RPA1;EP300;RAD23B;SIRT1
viral life cycle (GO:0019058)	6/108	0.000478023	0.00776049	0.00174824	0.0273682	-1.40311	10.728	GRK2;NUP155;NUP50;DEK;HTATSF1;RAN
ribosome assembly (GO:0042255)	4/57	0.00183576	0.0208106	0.00477179	0.0555301	-1.70244	10.7258	RPL3;RPL11;RPL23A;RPL6
regulation of apoptotic process (GO:0042981)	17/816	0.00137648	0.0170761	0.0118134	0.0984617	-1.62154	10.6831	HDAC2;ANXA5;PLK1;RPS6;SIRT1;SOD1;BCLAF1;RASSF2;SON;BAG1;ANP32E;CDK1;ARHGEF2;EVI2B;TARDBP;CTNNBL1;MAD2L1
ribosomal small subunit export from nucleus (GO:0000056)	1/7	0.0623275	0.235519	0.0859443	0.342741	-3.84091	10.6599	RAN
spliceosomal complex assembly (GO:0000245)	4/42	0.000578633	0.008746	0.00169795	0.0269012	-1.42547	10.6267	PRPF6;SRSF1;SNRNP200;SRSF6
regulation of mitotic metaphase/anaphase transition (GO:0030071)	2/16	0.0091842	0.0670957	0.0168656	0.128198	-2.22619	10.4414	UBE2C;PLK1
chromatin assembly (GO:0031497)	4/66	0.00314285	0.0303946	0.00776121	0.0739564	-1.81065	10.4341	CHAF1B;CHAF1A;ANP32E;HMGB2
mitotic DNA damage checkpoint (GO:0044773)	3/40	0.00580649	0.0477221	0.0121693	0.100646	-2.02253	10.4135	MSH2;CDK2;TOPBP1
regulation of glial cell differentiation (GO:0045685)	1/7	0.0623275	0.235519	0.0859443	0.342741	-3.74571	10.3957	CDK1
peptidyl-lysine acetylation (GO:0018394)	2/9	0.00287361	0.0286272	0.00638082	0.0671262	-1.73775	10.1696	EP300;SIRT1
postreplication repair (GO:0006301)	4/48	0.000963899	0.0130673	0.0026748	0.0374187	-1.46359	10.164	PCNA;MSH2;PCLAF;RPA1
DNA synthesis involved in DNA repair (GO:0000731)	5/66	0.000345442	0.00613861	0.00117426	0.020867	-1.26724	10.1008	POLA1;PCNA;PCLAF;RPA1;SIRT1
nuclear-transcribed mRNA catabolic process (GO:0000956)	8/175	0.000213427	0.0041889	0.00104391	0.0190658	-1.18991	10.0574	RPL7A;RPL3;RPL27A;RPL11;RPL37A;RPS6;RPL23A;RPL6
regulation of protein targeting (GO:1903533)	1/7	0.0623275	0.235519	0.0859443	0.342741	-3.62358	10.0567	PARL
protein destabilization (GO:0031648)	3/32	0.00307501	0.0303946	0.00688626	0.0701972	-1.72372	9.97078	PLK1;EP300;SIRT1
microtubule bundle formation (GO:0001578)	3/33	0.00335996	0.0317867	0.00745153	0.073496	-1.74748	9.95335	NUMA1;PLK1;NAV1
microtubule depolymerization (GO:0007019)	2/16	0.0091842	0.0670957	0.0168656	0.128198	-2.09714	9.83614	STMN1;KIF2C
viral genome replication (GO:0019079)	3/23	0.00116625	0.0148895	0.00294356	0.0403206	-1.45117	9.80114	GRK2;DEK;HTATSF1
positive regulation of DNA repair (GO:0045739)	3/39	0.00540695	0.0450009	0.0114122	0.0968199	-1.87539	9.78968	PCNA;TRIM28;SIRT1
positive regulation of chromatin silencing (GO:0031937)	2/9	0.00287361	0.0286272	0.00638082	0.0671262	-1.66664	9.75347	TRIM28;SIRT1
mRNA metabolic process (GO:0016071)	5/98	0.00207546	0.0232481	0.00593898	0.0666618	-1.5586	9.62835	SFPQ;SON;SRSF1;SRSF2;U2AF1
regulation of gene expression (GO:0010468)	19/1038	0.00316271	0.0303946	0.0267452	0.178185	-1.65185	9.50859	CTR9;HP1BP3;RPL11;HMGB2;HMGB3;NFATC2;CDK11B;SIRT1;RPL6;PQBP1;DDX19A;SFPQ;SON;PSPC1;CDK2;CDK1;EP300;MAPK1;TARDBP
peptidyl-serine modification (GO:0018209)	7/171	0.00101809	0.0135231	0.00385889	0.0492664	-1.36698	9.41827	HPF1;CAMK1D;GRK2;CDK2;PLK1;CDK1;MAPK1
positive regulation of intrinsic apoptotic signaling pathway (GO:2001244)	3/34	0.00366056	0.0331975	0.00804348	0.0750154	-1.67829	9.41546	BCLAF1;SFPQ;SOD1
negative regulation of stress fiber assembly (GO:0051497)	2/18	0.0115705	0.0792455	0.0206418	0.145935	-2.1082	9.4011	STMN1;WASF2
tRNA export from nucleus (GO:0006409)	3/34	0.00366056	0.0331975	0.00804348	0.0750154	-1.66515	9.3417	NUP155;NUP50;RAN
negative regulation of DNA recombination (GO:0045910)	2/17	0.0103466	0.0727581	0.0187132	0.137474	-2.04019	9.32589	HELB;MSH2
establishment of mitotic spindle localization (GO:0040001)	2/19	0.0128546	0.0862436	0.0226495	0.157588	-2.12221	9.24023	NUMA1;NUSAP1
regulation of helicase activity (GO:0051095)	2/10	0.00357045	0.0330643	0.00760111	0.073496	-1.63694	9.22424	MSH2;SIRT1
tRNA-containing ribonucleoprotein complex export from nucleus (GO:0071431)	3/34	0.00366056	0.0331975	0.00804348	0.0750154	-1.63392	9.1665	NUP155;NUP50;RAN
error-prone translesion synthesis (GO:0042276)	2/21	0.0155988	0.0986174	0.0268943	0.178185	-2.20085	9.15676	PCNA;RPA1
negative regulation of epidermal cell differentiation (GO:0045605)	1/8	0.0709102	0.245257	0.0961576	0.342741	-3.441	9.10605	SRSF6
maturation of 5.8S rRNA (GO:0000460)	2/18	0.0115705	0.0792455	0.0206418	0.145935	-2.03776	9.08696	WDR12;SKIV2L2
positive regulation of granulocyte differentiation (GO:0030854)	1/7	0.0623275	0.235519	0.0859443	0.342741	-3.26742	9.06823	EVI2B
protein localization to nucleolus (GO:1902570)	1/7	0.0623275	0.235519	0.0859443	0.342741	-3.22991	8.96414	RAN
protein import (GO:0017038)	4/57	0.00183576	0.0208106	0.00477179	0.0555301	-1.42216	8.96004	NUP155;CSE1L;NUP50;RAN
guanosine-containing compound metabolic process (GO:1901068)	2/17	0.0103466	0.0727581	0.0187132	0.137474	-1.9504	8.91548	GTPBP1;RAN
regulation of intracellular signal transduction (GO:1902531)	10/423	0.00571249	0.0472448	0.0235921	0.163282	-1.71438	8.85496	HDAC2;CSNK2A1;CDK2;RPL11;RPA1;EP300;MAPK1;ARHGEF2;TOPBP1;GMIP
translesion synthesis (GO:0019985)	3/43	0.00710928	0.0543529	0.0146103	0.11715	-1.78072	8.80805	PCNA;PCLAF;RPA1
negative regulation of keratinocyte differentiation (GO:0045617)	1/7	0.0623275	0.235519	0.0859443	0.342741	-3.17057	8.79946	SRSF6
histone deacetylation (GO:0016575)	3/37	0.00465877	0.0400411	0.009982	0.0886914	-1.63631	8.78535	HDAC2;SFPQ;SIRT1
positive regulation of binding (GO:0051099)	5/82	0.000937622	0.0128435	0.00288945	0.039996	-1.25444	8.74618	EPB41;RPL11;STMN1;HMGB2;RAN
nucleosome organization (GO:0034728)	4/80	0.00624858	0.0494993	0.0144922	0.116915	-1.71895	8.72437	CHAF1B;CHAF1A;ANP32E;HMGB2
purine ribonucleoside triphosphate metabolic process (GO:0009205)	3/33	0.00335996	0.0317867	0.00745153	0.073496	-1.51709	8.64108	GTPBP1;CLPX;RAN
positive regulation of mitotic cell cycle phase transition (GO:1901992)	3/41	0.00622328	0.0494993	0.0129546	0.105809	-1.70096	8.63993	UBE2C;RCC2;CDK1
SREBP signaling pathway (GO:0032933)	1/7	0.0623275	0.235519	0.0859443	0.342741	-3.09987	8.60323	ARHGEF10L
error-free translesion synthesis (GO:0070987)	2/20	0.0141977	0.0924258	0.0247343	0.170291	-2.0199	8.59402	PCNA;RPA1
transcription from RNA polymerase II promoter (GO:0006366)	13/486	0.00055521	0.00849757	0.00396901	0.050185	-1.13481	8.50669	C5AR1;CPSF2;CTR9;SRSF1;NFATC2;U2AF1;DEK;SRRM1;TRIM28;CDK1;SRSF2;SRSF6;TARDBP
regulation of cell cycle G2/M phase transition (GO:1902749)	5/85	0.00110264	0.0144997	0.0033463	0.043141	-1.24837	8.50146	CDK2;PLK1;CDK1;MAPRE1;TUBB4B
leptin-mediated signaling pathway (GO:0033210)	1/9	0.0794148	0.247465	0.106257	0.342741	-3.32849	8.4313	SIRT1
tRNA transport (GO:0051031)	3/36	0.00430972	0.0377753	0.00930846	0.0838399	-1.54745	8.42878	NUP155;NUP50;RAN
regulation of mitotic cell cycle (GO:0007346)	7/166	0.000855957	0.0121031	0.00329868	0.0429482	-1.19178	8.41788	NUMA1;PLK1;CDK1;MKI67;CDK11B;SIRT1;MAD2L1
rRNA transcription (GO:0009303)	2/17	0.0103466	0.0727581	0.0187132	0.137474	-1.80997	8.27356	GTF3C2;GTF3C6
Golgi disassembly (GO:0090166)	1/7	0.0623275	0.235519	0.0859443	0.342741	-2.97762	8.26394	CDK1
positive regulation of helicase activity (GO:0051096)	1/7	0.0623275	0.235519	0.0859443	0.342741	-2.97388	8.25356	MSH2
negative regulation of G-protein coupled receptor protein signaling pathway (GO:0045744)	2/22	0.0170566	0.105799	0.0291275	0.185935	-2.01369	8.19818	GRK2;STMN1
positive regulation of respiratory burst (GO:0060267)	1/9	0.0794148	0.247465	0.106257	0.342741	-3.22814	8.1771	CAMK1D
peptidyl-serine phosphorylation (GO:0018105)	6/146	0.00227776	0.0245513	0.00719669	0.0722416	-1.34106	8.15977	CAMK1D;GRK2;CDK2;PLK1;CDK1;MAPK1
regulation of response to wounding (GO:1903034)	1/7	0.0623275	0.235519	0.0859443	0.342741	-2.92946	8.1303	SRSF6
mitotic cytokinesis (GO:0000281)	4/60	0.00221859	0.0243121	0.00566208	0.0641865	-1.32678	8.10782	SON;PLK1;STMN1;NUSAP1
mRNA splice site selection (GO:0006376)	2/25	0.0217589	0.122802	0.0362477	0.214711	-2.11759	8.10557	SRSF1;SRSF6
positive regulation of spindle checkpoint (GO:0090232)	1/9	0.0794148	0.247465	0.106257	0.342741	-3.18403	8.06536	MAD2L1
cell cycle G2/M phase transition (GO:0044839)	5/128	0.00649677	0.0508527	0.0167329	0.128198	-1.59799	8.04821	CDK2;PLK1;CDK1;MAPRE1;TUBB4B
regulation of transcription, DNA-templated (GO:0006355)	25/1599	0.00587216	0.047962	0.0601414	0.303594	-1.55215	7.97423	HDAC2;PCNA;CTR9;HP1BP3;HMGB2;HMGB3;HTATSF1;RPL6;PHF8;BCLAF1;TRIM28;EP300;STAT6;LRRFIP1;NFATC2;DEK;CDK11B;HNRNPAB;SIRT1;POLA1;SFPQ;CREB1;PSPC1;LANCL2;RAN
positive regulation of mitotic nuclear division (GO:0045840)	3/41	0.00622328	0.0494993	0.0129546	0.105809	-1.56115	7.92979	NUMA1;UBE2C;NUSAP1
V(D)J recombination (GO:0033151)	1/8	0.0709102	0.245257	0.0961576	0.342741	-2.98709	7.90486	HMGB2
DNA packaging (GO:0006323)	2/18	0.0115705	0.0792455	0.0206418	0.145935	-1.76985	7.89228	CHAF1B;CHAF1A
negative regulation of supramolecular fiber organization (GO:1902904)	4/55	0.00160764	0.0197437	0.00423377	0.0502098	-1.22371	7.87209	STMN1;ARHGEF2;MAPRE1;CORO1A
mRNA cis splicing, via spliceosome (GO:0045292)	2/18	0.0115705	0.0792455	0.0206418	0.145935	-1.74307	7.77289	SRSF1;SNRNP200
mRNA 5'-splice site recognition (GO:0000395)	1/7	0.0623275	0.235519	0.0859443	0.342741	-2.78214	7.72142	SRSF1
transcription-coupled nucleotide-excision repair (GO:0006283)	4/74	0.00474213	0.0404929	0.011276	0.0962855	-1.44258	7.71964	PCNA;LIG1;RPA1;EP300
negative regulation of actin filament bundle assembly (GO:0032232)	2/21	0.0155988	0.0986174	0.0268943	0.178185	-1.8415	7.66167	STMN1;WASF2
white fat cell differentiation (GO:0050872)	1/7	0.0623275	0.235519	0.0859443	0.342741	-2.74998	7.63217	SIRT1
regulation of macrophage apoptotic process (GO:2000109)	1/7	0.0623275	0.235519	0.0859443	0.342741	-2.73787	7.59854	SIRT1
positive regulation of catecholamine secretion (GO:0033605)	1/7	0.0623275	0.235519	0.0859443	0.342741	-2.7281	7.57143	GRK2
purine ribonucleoside monophosphate catabolic process (GO:0009169)	1/7	0.0623275	0.235519	0.0859443	0.342741	-2.72742	7.56954	NUDT4
regulation of stress fiber assembly (GO:0051492)	4/61	0.00235754	0.0252046	0.00598182	0.0666618	-1.23535	7.47406	FHOD1;STMN1;ARHGEF10L;WASF2
positive regulation of transcription from RNA polymerase I promoter (GO:0045943)	2/22	0.0170566	0.105799	0.0291275	0.185935	-1.83559	7.47308	NCL;PHF8
microtubule cytoskeleton organization involved in mitosis (GO:1902850)	3/45	0.00806634	0.0602684	0.0163805	0.128198	-1.54903	7.46642	STMN1;NUSAP1;RAN
regulation of microtubule polymerization (GO:0031113)	3/36	0.00430972	0.0377753	0.00930846	0.0838399	-1.35424	7.37639	NUMA1;STMN1;MAPRE1
negative regulation of protein polymerization (GO:0032272)	2/23	0.0185699	0.110495	0.031432	0.195891	-1.84503	7.35467	STMN1;MAPRE1
response to muramyl dipeptide (GO:0032495)	1/10	0.0878419	0.251113	0.116245	0.342741	-2.99334	7.28044	ARHGEF2
pyrimidine deoxyribonucleotide biosynthetic process (GO:0009221)	1/7	0.0623275	0.235519	0.0859443	0.342741	-2.61653	7.2618	DTYMK
negative regulation of cAMP-dependent protein kinase activity (GO:2000480)	1/9	0.0794148	0.247465	0.106257	0.342741	-2.86309	7.25241	SIRT1
astral microtubule organization (GO:0030953)	1/7	0.0623275	0.235519	0.0859443	0.342741	-2.61204	7.24932	NUMA1
response to UV (GO:0009411)	5/99	0.00216993	0.0239786	0.0061839	0.0671262	-1.17694	7.21826	PCNA;MSH2;CIRBP;PCLAF;EP300
nuclear import (GO:0051170)	4/72	0.00430021	0.0377753	0.0103167	0.0887681	-1.31763	7.17987	NUP155;CSE1L;NUP50;RAN
protein modification by small protein conjugation (GO:0032446)	11/399	0.00115761	0.0148895	0.00636007	0.0671262	-1.05851	7.15698	PCNA;NUP155;TRIM28;UHRF2;UBE2C;NUP50;CTR9;PLK1;UBE2G1;SAE1;SIRT1
DNA damage response, signal transduction by p53 class mediator resulting in cell cycle arrest (GO:0006977)	4/63	0.00265319	0.02769	0.0066569	0.0683892	-1.20309	7.13673	PCNA;CDK2;CDK1;EP300
negative regulation of transcription, DNA-templated (GO:0045892)	15/814	0.00799485	0.0602684	0.0444165	0.243365	-1.47664	7.13065	HDAC2;CTR9;PLK1;HMGB2;SIRT1;BCLAF1;SFPQ;CREB1;TRIM28;PSPC1;LANCL2;EP300;HDGF;LRRFIP1;CGGBP1
negative regulation of necroptotic process (GO:0060546)	1/7	0.0623275	0.235519	0.0859443	0.342741	-2.56288	7.11291	ARHGEF2
peptidyl-threonine modification (GO:0018210)	4/90	0.00941037	0.0683682	0.0210379	0.14794	-1.51756	7.08086	CAMK1D;CSNK2A1;CDK1;MAPK1
microtubule polymerization or depolymerization (GO:0031109)	2/24	0.0201378	0.117201	0.033806	0.207733	-1.81302	7.08012	STMN1;KIF2C
positive regulation of cell aging (GO:0090343)	1/9	0.0794148	0.247465	0.106257	0.342741	-2.78785	7.06183	SIRT1
mast cell degranulation (GO:0043303)	1/9	0.0794148	0.247465	0.106257	0.342741	-2.77916	7.03982	MILR1
positive regulation of cellular senescence (GO:2000774)	1/8	0.0709102	0.245257	0.0961576	0.342741	-2.64778	7.00694	SIRT1
signal transduction involved in mitotic G1 DNA damage checkpoint (GO:0072431)	4/64	0.00281013	0.0286272	0.0070126	0.0709351	-1.1853	6.96307	PCNA;CDK2;CDK1;EP300
purine-containing compound biosynthetic process (GO:0072522)	2/23	0.0185699	0.110495	0.031432	0.195891	-1.74531	6.95717	MTHFD1L;PAICS
protein C-linked glycosylation via 2'-alpha-mannosyl-L-tryptophan (GO:0018406)	1/8	0.0709102	0.245257	0.0961576	0.342741	-2.62311	6.94164	DPY19L1
intrinsic apoptotic signaling pathway by p53 class mediator (GO:0072332)	3/44	0.00757885	0.057608	0.015481	0.123379	-1.4216	6.9408	MSH2;EP300;SIRT1
RNA splicing, via transesterification reactions (GO:0000375)	2/26	0.0234323	0.127442	0.0387554	0.224508	-1.84804	6.93687	PRPF6;SRRM1
rRNA-containing ribonucleoprotein complex export from nucleus (GO:0071428)	1/8	0.0709102	0.245257	0.0961576	0.342741	-2.61418	6.91802	RAN
macrophage derived foam cell differentiation (GO:0010742)	1/7	0.0623275	0.235519	0.0859443	0.342741	-2.47961	6.8818	EP300
positive regulation of microtubule polymerization (GO:0031116)	2/25	0.0217589	0.122802	0.0362477	0.214711	-1.7832	6.8256	NUMA1;MAPRE1
positive regulation of cytokine production (GO:0001819)	6/221	0.0162676	0.102354	0.0421245	0.237741	-1.65154	6.80198	EP300;STAT6;ARHGEF2;LRRFIP1;PQBP1;SOD1
regulation of protein deacetylation (GO:0090311)	1/9	0.0794148	0.247465	0.106257	0.342741	-2.68316	6.79662	EP300
cellular response to sterol depletion (GO:0071501)	1/8	0.0709102	0.245257	0.0961576	0.342741	-2.56603	6.7906	ARHGEF10L
ribosomal large subunit export from nucleus (GO:0000055)	1/9	0.0794148	0.247465	0.106257	0.342741	-2.67345	6.77203	RAN
positive regulation of histone methylation (GO:0031062)	2/25	0.0217589	0.122802	0.0362477	0.214711	-1.76797	6.76733	CTR9;SIRT1
positive regulation of adaptive immune response (GO:0002821)	1/7	0.0623275	0.235519	0.0859443	0.342741	-2.42984	6.74367	SIRT1
positive regulation of cell cycle process (GO:0090068)	5/108	0.00316658	0.0303946	0.00871616	0.0807165	-1.17062	6.73704	NUMA1;UHRF2;RCC2;NUSAP1;MAD2L1
DNA geometric change (GO:0032392)	2/25	0.0217589	0.122802	0.0362477	0.214711	-1.73904	6.65657	HMGB2;HMGB3
regulation of nuclease activity (GO:0032069)	1/7	0.0623275	0.235519	0.0859443	0.342741	-2.37588	6.59391	HMGB2
cellular response to superoxide (GO:0071451)	1/10	0.0878419	0.251113	0.116245	0.342741	-2.70137	6.57032	SOD1
cellular response to leptin stimulus (GO:0044320)	1/8	0.0709102	0.245257	0.0961576	0.342741	-2.48038	6.56393	SIRT1
regulation of smooth muscle cell apoptotic process (GO:0034391)	1/9	0.0794148	0.247465	0.106257	0.342741	-2.58557	6.54942	SIRT1
cytoplasmic translation (GO:0002181)	3/55	0.0139556	0.0917579	0.0269649	0.178185	-1.53131	6.54158	RPL27A;RPL11;RPL6
regulation of transcription involved in G1/S transition of mitotic cell cycle (GO:0000083)	2/27	0.0251569	0.133932	0.0413271	0.23526	-1.77401	6.53302	POLA1;PCNA
apoptotic process (GO:0006915)	6/232	0.0201426	0.117201	0.0509068	0.267662	-1.67136	6.52653	BCLAF1;CSE1L;ELMO1;EP300;CDK11B;MCM2
intrinsic apoptotic signaling pathway in response to DNA damage (GO:0008630)	3/49	0.0101984	0.0727581	0.0202665	0.145935	-1.42055	6.51399	MSH2;EP300;SIRT1
regulation of androgen receptor signaling pathway (GO:0060765)	2/24	0.0201378	0.117201	0.033806	0.207733	-1.66626	6.507	EP300;SIRT1
peptidyl-threonine phosphorylation (GO:0018107)	4/69	0.00369081	0.0332425	0.00897968	0.082002	-1.15776	6.4857	CAMK1D;CSNK2A1;CDK1;MAPK1
regulation of protein ADP-ribosylation (GO:0010835)	1/9	0.0794148	0.247465	0.106257	0.342741	-2.55355	6.46831	HPF1
positive regulation of peptidyl-threonine phosphorylation (GO:0010800)	2/26	0.0234323	0.127442	0.0387554	0.224508	-1.71336	6.43135	PLK1;MAPK1
regulation of stress-activated protein kinase signaling cascade (GO:0070302)	1/9	0.0794148	0.247465	0.106257	0.342741	-2.53367	6.41796	MAPK1
nuclear envelope organization (GO:0006998)	2/31	0.0325458	0.162729	0.0522213	0.271427	-1.86688	6.39425	NUP155;PLK1
myelin maintenance (GO:0043217)	1/9	0.0794148	0.247465	0.106257	0.342741	-2.52182	6.38795	SOD1
ATP-dependent chromatin remodeling (GO:0043044)	2/31	0.0325458	0.162729	0.0522213	0.271427	-1.86109	6.37444	HDAC2;ANP32E
regulation of mRNA splicing, via spliceosome (GO:0048024)	3/61	0.0183999	0.110495	0.0347027	0.210295	-1.5899	6.3523	HNRNPL;SON;SRSF6
positive regulation of histone H3-K9 methylation (GO:0051574)	1/8	0.0709102	0.245257	0.0961576	0.342741	-2.39986	6.35086	SIRT1
DNA damage response, signal transduction by p53 class mediator (GO:0030330)	4/83	0.0071086	0.0543529	0.0162969	0.128198	-1.28238	6.34324	PCNA;CDK2;CDK1;EP300
cytoskeleton-dependent cytokinesis (GO:0061640)	4/71	0.00409006	0.0365879	0.00985762	0.0881821	-1.14691	6.30708	SON;PLK1;STMN1;NUSAP1
cellular response to UV (GO:0034644)	3/68	0.0244663	0.131319	0.0450212	0.24464	-1.6979	6.29998	PCNA;EP300;SIRT1
transcription-dependent tethering of RNA polymerase II gene DNA at nuclear periphery (GO:0000972)	1/8	0.0709102	0.245257	0.0961576	0.342741	-2.37439	6.28345	NUP155
protein localization to chromosome (GO:0034502)	2/28	0.0269316	0.140536	0.0439612	0.241879	-1.73824	6.28278	PLK1;RPA1
purine ribonucleotide metabolic process (GO:0009150)	3/67	0.0235413	0.127442	0.0434634	0.241879	-1.66896	6.25692	GTPBP1;CLPX;RAN
histone H3-K36 demethylation (GO:0070544)	1/9	0.0794148	0.247465	0.106257	0.342741	-2.46675	6.24845	PHF8
protein export from nucleus (GO:0006611)	2/29	0.0287553	0.147133	0.0466561	0.25042	-1.76052	6.24797	CSE1L;RAN
cellular hyperosmotic response (GO:0071474)	1/7	0.0623275	0.235519	0.0859443	0.342741	-2.24708	6.23645	ARHGEF2
nose development (GO:0043584)	1/9	0.0794148	0.247465	0.106257	0.342741	-2.46055	6.23275	SMCHD1
positive regulation of microtubule polymerization or depolymerization (GO:0031112)	2/25	0.0217589	0.122802	0.0362477	0.214711	-1.6278	6.23078	NUMA1;MAPRE1
protein C-linked glycosylation via tryptophan (GO:0018317)	1/8	0.0709102	0.245257	0.0961576	0.342741	-2.35015	6.2193	DPY19L1
single strand break repair (GO:0000012)	1/7	0.0623275	0.235519	0.0859443	0.342741	-2.23506	6.20309	SIRT1
negative regulation of apoptotic process (GO:0043066)	12/486	0.00178056	0.020539	0.0100884	0.0887681	-0.978279	6.19332	HDAC2;SON;CSNK2A1;MSH2;ANXA5;BAG1;PLK1;CDK1;EVI2B;SIRT1;MAD2L1;SOD1
cellular triglyceride homeostasis (GO:0035356)	1/7	0.0623275	0.235519	0.0859443	0.342741	-2.23035	6.19	SIRT1
hyperosmotic response (GO:0006972)	1/8	0.0709102	0.245257	0.0961576	0.342741	-2.33274	6.17323	ARHGEF2
desensitization of G-protein coupled receptor protein signaling pathway (GO:0002029)	1/9	0.0794148	0.247465	0.106257	0.342741	-2.43531	6.1688	GRK2
negative regulation of programmed cell death (GO:0043069)	10/409	0.00453167	0.0392049	0.0192966	0.140973	-1.13973	6.15076	HDAC2;SON;ANXA5;BAG1;PLK1;CDK1;ARHGEF2;EVI2B;SIRT1;MAD2L1
GTP metabolic process (GO:0046039)	2/22	0.0170566	0.105799	0.0291275	0.185935	-1.5074	6.13694	GTPBP1;RAN
nucleotide-excision repair, DNA incision, 5'-to lesion (GO:0006296)	2/38	0.0472099	0.207629	0.0733765	0.339754	-2.00422	6.11918	PCNA;RPA1
DNA conformation change (GO:0071103)	2/19	0.0128546	0.0862436	0.0226495	0.157588	-1.40207	6.10471	HMGB2;HMGB3
regulation of keratinocyte differentiation (GO:0045616)	2/30	0.030627	0.154902	0.04941	0.261993	-1.74853	6.09514	NUMA1;SRSF6
regulation of protein localization to nucleus (GO:1900180)	2/28	0.0269316	0.140536	0.0439612	0.241879	-1.6838	6.08603	PLK1;CDK1
removal of superoxide radicals (GO:0019430)	1/10	0.0878419	0.251113	0.116245	0.342741	-2.50211	6.08567	SOD1
B cell mediated immunity (GO:0019724)	1/9	0.0794148	0.247465	0.106257	0.342741	-2.39889	6.07656	MSH2
negative regulation of alcohol biosynthetic process (GO:1902931)	1/10	0.0878419	0.251113	0.116245	0.342741	-2.49681	6.07279	SOD1
G2/M transition of mitotic cell cycle (GO:0000086)	5/127	0.00628853	0.0495175	0.016246	0.128198	-1.19615	6.06333	CDK2;PLK1;CDK1;MAPRE1;TUBB4B
foam cell differentiation (GO:0090077)	1/7	0.0623275	0.235519	0.0859443	0.342741	-2.18376	6.06072	EP300
sphingosine-1-phosphate signaling pathway (GO:0003376)	1/7	0.0623275	0.235519	0.0859443	0.342741	-2.17988	6.04993	SPNS1
endosome to pigment granule transport (GO:0043485)	1/10	0.0878419	0.251113	0.116245	0.342741	-2.47809	6.02726	AP1M1
peptidyl-lysine deacetylation (GO:0034983)	1/8	0.0709102	0.245257	0.0961576	0.342741	-2.27419	6.01827	SIRT1
regulation of establishment of protein localization to mitochondrion (GO:1903747)	1/9	0.0794148	0.247465	0.106257	0.342741	-2.37455	6.01491	PARL
intracellular transport of virus (GO:0075733)	3/55	0.0139556	0.0917579	0.0269649	0.178185	-1.40756	6.01293	NUP155;NUP50;RAN
regulation of cytoplasmic transport (GO:1903649)	1/9	0.0794148	0.247465	0.106257	0.342741	-2.37094	6.00575	MAPK1
retrograde axonal transport (GO:0008090)	1/8	0.0709102	0.245257	0.0961576	0.342741	-2.25932	5.97892	SOD1
regulation of gene silencing by RNA (GO:0060966)	3/56	0.0146482	0.0939629	0.0281826	0.183085	-1.41496	5.97599	NUP155;NUP50;RAN
mast cell activation involved in immune response (GO:0002279)	1/9	0.0794148	0.247465	0.106257	0.342741	-2.35765	5.97209	MILR1
transcription from RNA polymerase III promoter (GO:0006383)	2/28	0.0269316	0.140536	0.0439612	0.241879	-1.65134	5.96871	GTF3C2;GTF3C6
regulation of cytokinesis (GO:0032465)	3/78	0.0347794	0.168292	0.0620816	0.306907	-1.77424	5.95919	PRC1;PLK1;PRPF40A
histone H4 deacetylation (GO:0070933)	1/9	0.0794148	0.247465	0.106257	0.342741	-2.35235	5.95867	HDAC2
regulation of posttranscriptional gene silencing (GO:0060147)	3/56	0.0146482	0.0939629	0.0281826	0.183085	-1.4097	5.95378	NUP155;NUP50;RAN
regulation of attachment of spindle microtubules to kinetochore (GO:0051988)	1/11	0.0961923	0.264077	0.126122	0.356667	-2.53975	5.94658	RCC2
DNA recombination (GO:0006310)	3/56	0.0146482	0.0939629	0.0281826	0.183085	-1.40648	5.94017	RPA1;HMGB3;TSN
nucleotide-excision repair, preincision complex assembly (GO:0006294)	2/30	0.030627	0.154902	0.04941	0.261993	-1.70295	5.93628	RPA1;RAD23B
regulation of mRNA processing (GO:0050684)	2/29	0.0287553	0.147133	0.0466561	0.25042	-1.66153	5.89665	SON;CDK11B
regulation of type I interferon production (GO:0032479)	4/86	0.00804337	0.0602684	0.0182367	0.137036	-1.22227	5.89487	EP300;STAT6;LRRFIP1;PQBP1
transport of virus (GO:0046794)	3/55	0.0139556	0.0917579	0.0269649	0.178185	-1.37533	5.87522	NUP155;NUP50;RAN
ribosomal subunit export from nucleus (GO:0000054)	1/13	0.112666	0.272345	0.145547	0.361122	-2.68498	5.8622	RAN
regulation of endodeoxyribonuclease activity (GO:0032071)	1/9	0.0794148	0.247465	0.106257	0.342741	-2.30471	5.838	SIRT1
response to dopamine (GO:1903350)	1/10	0.0878419	0.251113	0.116245	0.342741	-2.38521	5.80134	MAPK1
regulation of organ growth (GO:0046620)	1/10	0.0878419	0.251113	0.116245	0.342741	-2.38496	5.80074	SOD1
regulation of macromolecule metabolic process (GO:0060255)	5/130	0.00692766	0.0539046	0.0177356	0.134036	-1.16543	5.79477	DDX19A;CDK2;CDK1;MAPK1;CDK11B
nucleoside metabolic process (GO:0009116)	1/11	0.0961923	0.264077	0.126122	0.356667	-2.44632	5.72783	ERH
mitotic G1 DNA damage checkpoint (GO:0031571)	1/11	0.0961923	0.264077	0.126122	0.356667	-2.43619	5.70412	CDK2
nucleobase-containing small molecule interconversion (GO:0015949)	2/32	0.0345105	0.168292	0.0550885	0.284084	-1.69341	5.70084	DTYMK;RRM1
negative regulation of mRNA polyadenylation (GO:1900364)	1/9	0.0794148	0.247465	0.106257	0.342741	-2.24826	5.69501	CTR9
maturation of LSU-rRNA from tricistronic rRNA transcript (SSU-rRNA, 5.8S rRNA, LSU-rRNA) (GO:0000463)	1/10	0.0878419	0.251113	0.116245	0.342741	-2.33944	5.69003	WDR12
protein deacetylation (GO:0006476)	2/33	0.0365202	0.173372	0.0580098	0.294529	-1.71875	5.68887	HDAC2;SIRT1
negative regulation of substrate adhesion-dependent cell spreading (GO:1900025)	1/13	0.112666	0.272345	0.145547	0.361122	-2.60203	5.6811	RCC2
complement receptor mediated signaling pathway (GO:0002430)	1/11	0.0961923	0.264077	0.126122	0.356667	-2.41132	5.64588	C5AR1
regulation of gene silencing by miRNA (GO:0060964)	3/68	0.0244663	0.131319	0.0450212	0.24464	-1.51764	5.63114	NUP155;NUP50;RAN
phagolysosome assembly (GO:0001845)	1/9	0.0794148	0.247465	0.106257	0.342741	-2.21682	5.61536	CORO1A
regulation of bile acid biosynthetic process (GO:0070857)	1/10	0.0878419	0.251113	0.116245	0.342741	-2.30529	5.60696	SIRT1
mitotic DNA replication checkpoint (GO:0033314)	1/10	0.0878419	0.251113	0.116245	0.342741	-2.29512	5.58222	TOPBP1
regulation of protein acetylation (GO:1901983)	1/10	0.0878419	0.251113	0.116245	0.342741	-2.29481	5.58146	SIRT1
regulation of respiratory burst (GO:0060263)	1/11	0.0961923	0.264077	0.126122	0.356667	-2.38231	5.57795	CAMK1D
negative regulation of GTPase activity (GO:0034260)	2/23	0.0185699	0.110495	0.031432	0.195891	-1.39715	5.56933	RCC2;GMIP
protein localization to microtubule cytoskeleton (GO:0072698)	1/9	0.0794148	0.247465	0.106257	0.342741	-2.19515	5.56047	MAPRE1
stress-induced premature senescence (GO:0090400)	1/9	0.0794148	0.247465	0.106257	0.342741	-2.16958	5.49569	SIRT1
positive regulation of myeloid cell apoptotic process (GO:0033034)	1/8	0.0709102	0.245257	0.0961576	0.342741	-2.07396	5.48839	SIRT1
cellular response to nitric oxide (GO:0071732)	1/9	0.0794148	0.247465	0.106257	0.342741	-2.16303	5.4791	CDK2
positive regulation of transcription of nuclear large rRNA transcript from RNA polymerase I promoter (GO:1901838)	1/10	0.0878419	0.251113	0.116245	0.342741	-2.24857	5.46902	NCL
RNA biosynthetic process (GO:0032774)	2/27	0.0251569	0.133932	0.0413271	0.23526	-1.48279	5.46057	POLA1;HELB
tachykinin receptor signaling pathway (GO:0007217)	1/8	0.0709102	0.245257	0.0961576	0.342741	-2.06334	5.46029	GRK2
inner ear receptor stereocilium organization (GO:0060122)	1/8	0.0709102	0.245257	0.0961576	0.342741	-2.05725	5.44419	SOD1
protein maturation by iron-sulfur cluster transfer (GO:0097428)	1/8	0.0709102	0.245257	0.0961576	0.342741	-2.05574	5.44018	NFU1
negative regulation of double-strand break repair via homologous recombination (GO:2000042)	1/9	0.0794148	0.247465	0.106257	0.342741	-2.14609	5.43619	HELB
positive regulation of epidermis development (GO:0045684)	1/10	0.0878419	0.251113	0.116245	0.342741	-2.23279	5.43063	NUMA1
mast cell mediated immunity (GO:0002448)	1/10	0.0878419	0.251113	0.116245	0.342741	-2.23081	5.42581	MILR1
negative regulation of necrotic cell death (GO:0060547)	1/8	0.0709102	0.245257	0.0961576	0.342741	-2.04948	5.42362	ARHGEF2
protein localization to microtubule (GO:0035372)	1/9	0.0794148	0.247465	0.106257	0.342741	-2.14018	5.42124	MAPRE1
G1 DNA damage checkpoint (GO:0044783)	1/11	0.0961923	0.264077	0.126122	0.356667	-2.30977	5.40811	CDK2
neutrophil degranulation (GO:0043312)	9/480	0.0329323	0.164038	0.097545	0.342741	-1.58091	5.39612	ACTR2;C5AR1;COTL1;MAPK1;PSMD1;KCNAB2;TUBB4B;AP1M1;DERA
methylation-dependent chromatin silencing (GO:0006346)	1/12	0.104467	0.267785	0.135889	0.359545	-2.38126	5.37899	SIRT1
Fc-gamma receptor signaling pathway (GO:0038094)	4/135	0.035626	0.171605	0.0703819	0.336553	-1.61235	5.37667	ACTR2;ELMO1;MAPK1;WASF2
modulation by host of viral transcription (GO:0043921)	2/28	0.0269316	0.140536	0.0439612	0.241879	-1.48671	5.37364	EP300;TARDBP
heterochromatin organization (GO:0070828)	1/10	0.0878419	0.251113	0.116245	0.342741	-2.19975	5.35027	HP1BP3
response to axon injury (GO:0048678)	1/12	0.104467	0.267785	0.135889	0.359545	-2.36285	5.33742	SOD1
regulation of brown fat cell differentiation (GO:0090335)	1/9	0.0794148	0.247465	0.106257	0.342741	-2.10533	5.33296	SIRT1
protein depolymerization (GO:0051261)	2/26	0.0234323	0.127442	0.0387554	0.224508	-1.41796	5.32252	STMN1;KIF2C
cellular response to dopamine (GO:1903351)	1/10	0.0878419	0.251113	0.116245	0.342741	-2.18766	5.32085	MAPK1
Golgi inheritance (GO:0048313)	1/10	0.0878419	0.251113	0.116245	0.342741	-2.18757	5.32064	CDK1
epithelial cell differentiation (GO:0030855)	4/97	0.0121498	0.0823556	0.0265456	0.178185	-1.2027	5.30445	HDAC2;PCNA;CDK1;TAGLN2
positive regulation of protein binding (GO:0032092)	3/61	0.0183999	0.110495	0.0347027	0.210295	-1.32725	5.3029	EPB41;RPL11;RAN
positive regulation of programmed cell death (GO:0043068)	7/258	0.00978346	0.0706882	0.0293594	0.18651	-1.14203	5.28423	BCLAF1;RASSF2;RPS6;ARHGEF2;SIRT1;CTNNBL1;SOD1
maturation of LSU-rRNA (GO:0000470)	2/23	0.0185699	0.110495	0.031432	0.195891	-1.32096	5.26564	RPL7A;WDR12
somatic recombination of immunoglobulin genes involved in immune response (GO:0002204)	1/10	0.0878419	0.251113	0.116245	0.342741	-2.16013	5.2539	MSH2
dicarboxylic acid biosynthetic process (GO:0043650)	1/11	0.0961923	0.264077	0.126122	0.356667	-2.24184	5.24905	MTHFD1L
regulation of spindle assembly (GO:0090169)	2/26	0.0234323	0.127442	0.0387554	0.224508	-1.38781	5.20933	NUMA1;PLK1
production of siRNA involved in RNA interference (GO:0030422)	1/10	0.0878419	0.251113	0.116245	0.342741	-2.13873	5.20186	TSN
negative regulation of cellular senescence (GO:2000773)	1/12	0.104467	0.267785	0.135889	0.359545	-2.29702	5.1887	SIRT1
nucleotide metabolic process (GO:0009117)	1/14	0.12079	0.276242	0.155099	0.364856	-2.45333	5.1856	NUDT4
somatic hypermutation of immunoglobulin genes (GO:0016446)	1/13	0.112666	0.272345	0.145547	0.361122	-2.37438	5.18406	MSH2
positive regulation of apoptotic process (GO:0043065)	7/308	0.0235501	0.127442	0.0634722	0.312607	-1.38108	5.17715	BCLAF1;RASSF2;RPS6;ARHGEF2;SIRT1;CTNNBL1;SOD1
stress granule assembly (GO:0034063)	1/12	0.104467	0.267785	0.135889	0.359545	-2.29117	5.17548	CIRBP
regulation of peroxisome proliferator activated receptor signaling pathway (GO:0035358)	1/9	0.0794148	0.247465	0.106257	0.342741	-2.03951	5.16623	SIRT1
regulation of granulocyte differentiation (GO:0030852)	1/11	0.0961923	0.264077	0.126122	0.356667	-2.19185	5.13201	EVI2B
creatine metabolic process (GO:0006600)	1/11	0.0961923	0.264077	0.126122	0.356667	-2.17908	5.1021	CKB
regulation of protein binding (GO:0043393)	4/112	0.0196136	0.11618	0.0410213	0.23526	-1.2969	5.09881	EPB41;PLK1;RPL11;RAN
cellular response to reactive nitrogen species (GO:1902170)	1/9	0.0794148	0.247465	0.106257	0.342741	-2.00656	5.08275	CDK2
nucleic acid-templated transcription (GO:0097659)	3/77	0.0336616	0.167038	0.060257	0.303594	-1.49619	5.07418	GTF3C2;GTF3C6;PTMA
neutrophil mediated immunity (GO:0002446)	9/488	0.0360021	0.172784	0.105056	0.342741	-1.51763	5.04487	ACTR2;C5AR1;COTL1;MAPK1;PSMD1;KCNAB2;TUBB4B;AP1M1;DERA
double-strand break repair (GO:0006302)	4/142	0.0416459	0.192832	0.0809958	0.342741	-1.58649	5.04276	POLA1;SFPQ;MSH2;RPA1
inositol phosphate metabolic process (GO:0043647)	2/48	0.0714323	0.245257	0.107345	0.342741	-1.91049	5.04181	INPP5D;NUDT4
mRNA stabilization (GO:0048255)	2/34	0.0385739	0.180515	0.0609838	0.303764	-1.5487	5.04129	CIRBP;TARDBP
G2 DNA damage checkpoint (GO:0031572)	2/33	0.0365202	0.173372	0.0580098	0.294529	-1.5196	5.0297	PLK1;TOPBP1
UV-damage excision repair (GO:0070914)	1/12	0.104467	0.267785	0.135889	0.359545	-2.22462	5.02517	SIRT1
response to leptin (GO:0044321)	1/9	0.0794148	0.247465	0.106257	0.342741	-1.97519	5.0033	SIRT1
protein import into nucleus (GO:0006606)	4/104	0.0153538	0.0980111	0.0328421	0.203714	-1.19776	5.0023	NUP155;CSE1L;NUP50;RAN
regulation of coenzyme metabolic process (GO:0051196)	2/40	0.0517676	0.222465	0.0798505	0.342741	-1.6849	4.98896	NUP155;NUP50
metallo-sulfur cluster assembly (GO:0031163)	1/15	0.128841	0.282847	0.164544	0.371778	-2.43108	4.98171	NFU1
proteasomal protein catabolic process (GO:0010498)	6/238	0.0225007	0.126446	0.0561373	0.288362	-1.31157	4.97638	UBE2C;CDK1;PSMD1;BUB3;SIRT1;MAD2L1
ciliary basal body-plasma membrane docking (GO:0097711)	4/97	0.0121498	0.0823556	0.0265456	0.178185	-1.12198	4.94841	PLK1;CDK1;MAPRE1;TUBB4B
negative regulation of mRNA 3'-end processing (GO:0031441)	1/10	0.0878419	0.251113	0.116245	0.342741	-2.03167	4.94146	CTR9
negative regulation of circadian rhythm (GO:0042754)	1/10	0.0878419	0.251113	0.116245	0.342741	-2.02501	4.92526	SFPQ
positive regulation of lamellipodium assembly (GO:0010592)	1/14	0.12079	0.276242	0.155099	0.364856	-2.32602	4.91651	WASF2
regulation of double-strand break repair (GO:2000779)	2/35	0.0406707	0.188982	0.064009	0.314074	-1.53481	4.91484	HELB;DEK
negative regulation of intrinsic apoptotic signaling pathway in response to DNA damage by p53 class mediator (GO:1902166)	1/12	0.104467	0.267785	0.135889	0.359545	-2.1708	4.9036	SIRT1
histone modification (GO:0016570)	4/99	0.0130167	0.0868884	0.0282633	0.183085	-1.12803	4.89738	HDAC2;CDK2;EP300;SIRT1
response to nitric oxide (GO:0071731)	1/12	0.104467	0.267785	0.135889	0.359545	-2.16716	4.89538	CDK2
positive regulation of keratinocyte differentiation (GO:0045618)	1/13	0.112666	0.272345	0.145547	0.361122	-2.23946	4.88947	NUMA1
regulation of T cell differentiation (GO:0045580)	2/34	0.0385739	0.180515	0.0609838	0.303764	-1.50045	4.88423	NFATC2;SOD1
negative regulation of transcription by competitive promoter binding (GO:0010944)	1/10	0.0878419	0.251113	0.116245	0.342741	-2.00809	4.88411	CREB1
endosome to melanosome transport (GO:0035646)	1/10	0.0878419	0.251113	0.116245	0.342741	-2.00258	4.87071	AP1M1
lymphocyte mediated immunity (GO:0002449)	1/12	0.104467	0.267785	0.135889	0.359545	-2.14987	4.85632	MSH2
negative regulation of protein ubiquitination involved in ubiquitin-dependent protein catabolic process (GO:2000059)	1/12	0.104467	0.267785	0.135889	0.359545	-2.14412	4.84333	RPL11
positive regulation of gene expression (GO:0010628)	13/772	0.0255069	0.135248	0.100675	0.342741	-1.31994	4.84261	HDAC2;RPL11;CIRBP;HMGB2;NFATC2;DEK;HNRNPAB;PHF8;CREB1;TRIM28;EP300;MAPK1;RAN
positive regulation of leukocyte apoptotic process (GO:2000108)	1/10	0.0878419	0.251113	0.116245	0.342741	-1.98746	4.83392	SIRT1
negative regulation of leukocyte activation (GO:0002695)	1/12	0.104467	0.267785	0.135889	0.359545	-2.13652	4.82616	MILR1
base-excision repair (GO:0006284)	2/38	0.0472099	0.207629	0.0733765	0.339754	-1.57783	4.81735	LIG1;RPA1
JAK-STAT cascade (GO:0007259)	2/41	0.0541032	0.227303	0.0831521	0.342741	-1.64969	4.81192	CTR9;MAPK1
internal protein amino acid acetylation (GO:0006475)	1/12	0.104467	0.267785	0.135889	0.359545	-2.12816	4.80728	EP300
regulation of microtubule binding (GO:1904526)	1/8	0.0709102	0.245257	0.0961576	0.342741	-1.81026	4.79057	MAPRE1
positive regulation of epithelial cell proliferation (GO:0050679)	4/108	0.0174023	0.107436	0.0368	0.217004	-1.18101	4.78446	C5AR1;HMGB2;SRSF6;SIRT1
positive regulation of ubiquitin-protein transferase activity (GO:0051443)	2/32	0.0345105	0.168292	0.0550885	0.284084	-1.41033	4.74786	UBE2C;PLK1
DNA biosynthetic process (GO:0071897)	2/40	0.0517676	0.222465	0.0798505	0.342741	-1.60346	4.74785	POLA1;SIRT1
cellular response to reactive oxygen species (GO:0034614)	3/66	0.0226359	0.126665	0.0419333	0.237682	-1.24999	4.73523	CDK2;MAPK1;SIRT1
DNA topological change (GO:0006265)	1/10	0.0878419	0.251113	0.116245	0.342741	-1.94662	4.73459	HMGB2
tetrahydrofolate metabolic process (GO:0046653)	1/14	0.12079	0.276242	0.155099	0.364856	-2.23859	4.73172	MTHFD1L
cellular response to exogenous dsRNA (GO:0071360)	1/14	0.12079	0.276242	0.155099	0.364856	-2.23612	4.72648	PQBP1
heart process (GO:0003015)	1/12	0.104467	0.267785	0.135889	0.359545	-2.09194	4.72545	SOD1
vasodilation (GO:0042311)	1/10	0.0878419	0.251113	0.116245	0.342741	-1.94154	4.72225	SOD1
regulation of DNA-templated transcription, initiation (GO:2000142)	1/11	0.0961923	0.264077	0.126122	0.356667	-2.01614	4.72061	BCLAF1
regulation of mast cell activation (GO:0033003)	1/10	0.0878419	0.251113	0.116245	0.342741	-1.93308	4.70167	MILR1
mitotic spindle elongation (GO:0000022)	1/12	0.104467	0.267785	0.135889	0.359545	-2.07812	4.69423	PRC1
macrophage differentiation (GO:0030225)	1/12	0.104467	0.267785	0.135889	0.359545	-2.07521	4.68767	SIRT1
attachment of mitotic spindle microtubules to kinetochore (GO:0051315)	1/12	0.104467	0.267785	0.135889	0.359545	-2.06695	4.66901	KIF2C
positive regulation of nucleic acid-templated transcription (GO:1903508)	9/503	0.0422782	0.195073	0.120005	0.353035	-1.47272	4.65892	HDAC2;CREB1;TRIM28;HMGB2;EP300;NFATC2;HNRNPAB;RAN;PHF8
positive regulation of transcription, DNA-templated (GO:0045893)	17/1121	0.0283926	0.146993	0.133987	0.359545	-1.30563	4.65015	HDAC2;FHOD1;CTR9;HMGB2;NFATC2;HNRNPAB;SIRT1;PHF8;BCLAF1;SFPQ;CREB1;PRPF6;TRIM28;EP300;STAT6;ARHGEF2;RAN
response to reactive oxygen species (GO:0000302)	3/61	0.0183999	0.110495	0.0347027	0.210295	-1.16366	4.64932	MAPK1;SIRT1;SOD1
hepatocyte growth factor receptor signaling pathway (GO:0048012)	1/12	0.104467	0.267785	0.135889	0.359545	-2.05774	4.64821	STMN1
establishment of spindle localization (GO:0051293)	1/11	0.0961923	0.264077	0.126122	0.356667	-1.98291	4.64279	NUSAP1
B cell activation involved in immune response (GO:0002312)	1/14	0.12079	0.276242	0.155099	0.364856	-2.18595	4.62045	MSH2
histone H3-K9 demethylation (GO:0033169)	1/13	0.112666	0.272345	0.145547	0.361122	-2.11616	4.62027	PHF8
regulation of defense response to virus by virus (GO:0050690)	2/29	0.0287553	0.147133	0.0466561	0.25042	-1.29864	4.6088	ELMO1;AP1M1
positive regulation of mitotic cell cycle spindle assembly checkpoint (GO:0090267)	1/8	0.0709102	0.245257	0.0961576	0.342741	-1.7411	4.60755	MAD2L1
positive regulation of insulin receptor signaling pathway (GO:0046628)	1/8	0.0709102	0.245257	0.0961576	0.342741	-1.73716	4.59713	SIRT1
negative regulation of peptidyl-lysine acetylation (GO:2000757)	1/10	0.0878419	0.251113	0.116245	0.342741	-1.88162	4.57651	SIRT1
epithelial to mesenchymal transition (GO:0001837)	2/38	0.0472099	0.207629	0.0733765	0.339754	-1.49695	4.57042	TRIM28;HNRNPAB
regulation of cholesterol biosynthetic process (GO:0045540)	2/41	0.0541032	0.227303	0.0831521	0.342741	-1.56265	4.55802	RAN;SOD1
negative regulation of histone acetylation (GO:0035067)	1/12	0.104467	0.267785	0.135889	0.359545	-2.01312	4.54742	SIRT1
regulation of mitotic spindle organization (GO:0060236)	2/36	0.0428096	0.195467	0.0670838	0.326723	-1.4394	4.53554	NUMA1;PLK1
telomere organization (GO:0032200)	2/42	0.0564755	0.235519	0.0864948	0.342741	-1.57563	4.52828	PCNA;RPA1
regulation of proteolysis (GO:0030162)	3/64	0.0208832	0.120975	0.0389567	0.224684	-1.16974	4.52549	HDAC2;PLK1;PARL
exit from mitosis (GO:0010458)	1/13	0.112666	0.272345	0.145547	0.361122	-2.06578	4.51027	UBE2C
positive regulation of megakaryocyte differentiation (GO:0045654)	1/7	0.0623275	0.235519	0.0859443	0.342741	-1.62372	4.50639	HMGB2
fatty acid homeostasis (GO:0055089)	1/10	0.0878419	0.251113	0.116245	0.342741	-1.84314	4.4829	SIRT1
cellular macromolecule catabolic process (GO:0044265)	2/49	0.074038	0.247465	0.11094	0.342741	-1.71575	4.46641	UBE2G1;SKIV2L2
regulation of cell cycle arrest (GO:0071156)	2/49	0.074038	0.247465	0.11094	0.342741	-1.71121	4.45457	UHRF2;EVI2B
regulation of nucleic acid-templated transcription (GO:1903506)	10/608	0.0534379	0.227303	0.153955	0.364856	-1.51965	4.45141	SFPQ;PSPC1;CTR9;HP1BP3;HMGB2;EP300;HMGB3;NFATC2;CDK11B;RPL6
regulation of protein import into nucleus, translocation (GO:0033158)	1/13	0.112666	0.272345	0.145547	0.361122	-2.03857	4.45087	SIRT1
regulation of peptidyl-threonine phosphorylation (GO:0010799)	2/38	0.0472099	0.207629	0.0733765	0.339754	-1.45574	4.44458	PLK1;MAPK1
negative regulation of focal adhesion assembly (GO:0051895)	1/15	0.128841	0.282847	0.164544	0.371778	-2.16867	4.44399	RCC2
proteasome-mediated ubiquitin-dependent protein catabolic process (GO:0043161)	7/292	0.0182033	0.110495	0.0507096	0.267662	-1.10784	4.43818	UBE2C;PLK1;CDK1;PSMD1;BUB3;SIRT1;MAD2L1
isotype switching (GO:0045190)	1/12	0.104467	0.267785	0.135889	0.359545	-1.96453	4.43765	MSH2
regulation of proteasomal ubiquitin-dependent protein catabolic process (GO:0032434)	3/89	0.0483179	0.211793	0.0837878	0.342741	-1.46333	4.43384	PLK1;RPL11;RAD23B
calcineurin-NFAT signaling cascade (GO:0033173)	1/12	0.104467	0.267785	0.135889	0.359545	-1.95815	4.42323	NFATC2
negative regulation of viral release from host cell (GO:1902187)	1/14	0.12079	0.276242	0.155099	0.364856	-2.07487	4.38566	TRIM28
regulation of histone H3-K9 methylation (GO:0051570)	1/12	0.104467	0.267785	0.135889	0.359545	-1.93837	4.37855	SIRT1
positive regulation of protein localization to nucleus (GO:1900182)	2/43	0.0588836	0.235519	0.0898774	0.342741	-1.54343	4.3713	PLK1;CDK1
protein acetylation (GO:0006473)	2/34	0.0385739	0.180515	0.0609838	0.303764	-1.33952	4.36038	EP300;SIRT1
mRNA transcription from RNA polymerase II promoter (GO:0042789)	1/17	0.144722	0.294142	0.18312	0.380849	-2.24099	4.3317	C5AR1
transcription, DNA-templated (GO:0006351)	7/357	0.0464062	0.207629	0.113731	0.342741	-1.41074	4.33144	GTF3C2;GTF3C6;CTR9;NFATC2;DEK;TARDBP;PTMA
cellular protein metabolic process (GO:0044267)	10/485	0.0140715	0.0920598	0.0510899	0.267662	-1.0132	4.31988	RPL7A;RPL3;RPL27A;RPL11;RPL37A;RPS6;RPL23A;UBE2G1;HARS;RPL6
regulation of histone methylation (GO:0031060)	1/13	0.112666	0.272345	0.145547	0.361122	-1.97582	4.31386	CTR9
regulation of cAMP-dependent protein kinase activity (GO:2000479)	1/14	0.12079	0.276242	0.155099	0.364856	-2.03283	4.29679	SIRT1
histone H3-K4 trimethylation (GO:0080182)	1/10	0.0878419	0.251113	0.116245	0.342741	-1.76648	4.29647	CTR9
regulation of T cell differentiation in thymus (GO:0033081)	1/13	0.112666	0.272345	0.145547	0.361122	-1.96694	4.29448	SOD1
antigen processing and presentation of exogenous peptide antigen via MHC class II (GO:0019886)	3/98	0.0610349	0.235519	0.103623	0.342741	-1.53495	4.29221	KIF2C;AP1M1;KIF15
negative regulation of heart contraction (GO:0045822)	1/12	0.104467	0.267785	0.135889	0.359545	-1.89952	4.29079	GRK2
regulation of transcription of nuclear large rRNA transcript from RNA polymerase I promoter (GO:1901836)	1/13	0.112666	0.272345	0.145547	0.361122	-1.95754	4.27396	NCL
negative regulation by host of viral transcription (GO:0043922)	1/13	0.112666	0.272345	0.145547	0.361122	-1.95614	4.27089	TARDBP
positive regulation of neuron migration (GO:2001224)	1/13	0.112666	0.272345	0.145547	0.361122	-1.9529	4.26383	ARHGEF2
regulation of chromatin organization (GO:1902275)	1/11	0.0961923	0.264077	0.126122	0.356667	-1.81469	4.24893	MKI67
response to UV-B (GO:0010224)	1/14	0.12079	0.276242	0.155099	0.364856	-2.00832	4.24499	MSH2
positive regulation of transcription from RNA polymerase II promoter (GO:0045944)	13/849	0.0486114	0.212372	0.166835	0.374848	-1.40177	4.2388	HDAC2;FHOD1;CTR9;HMGB2;NFATC2;ARHGEF10L;SIRT1;SFPQ;CREB1;PRPF6;EP300;STAT6;ARHGEF2
positive regulation of cellular protein localization (GO:1903829)	3/67	0.0235413	0.127442	0.0434634	0.241879	-1.13007	4.23664	NUMA1;PLK1;CDK1
regulation of steroid biosynthetic process (GO:0050810)	2/45	0.0638039	0.238358	0.0967572	0.342741	-1.5333	4.21955	SIRT1;RAN
chromatin silencing at rDNA (GO:0000183)	1/12	0.104467	0.267785	0.135889	0.359545	-1.8648	4.21237	SIRT1
N-terminal protein amino acid acetylation (GO:0006474)	1/16	0.136818	0.288788	0.173884	0.374848	-2.11766	4.21224	EP300
negative regulation of fatty acid biosynthetic process (GO:0045717)	1/12	0.104467	0.267785	0.135889	0.359545	-1.86433	4.21131	SIRT1
positive regulation of superoxide anion generation (GO:0032930)	1/12	0.104467	0.267785	0.135889	0.359545	-1.8599	4.20131	SOD1
serine family amino acid biosynthetic process (GO:0009070)	1/13	0.112666	0.272345	0.145547	0.361122	-1.91555	4.18228	SERINC3
regulation of alternative mRNA splicing, via spliceosome (GO:0000381)	2/40	0.0517676	0.222465	0.0798505	0.342741	-1.41149	4.17941	HNRNPL;SRSF6
establishment of chromosome localization (GO:0051303)	1/14	0.12079	0.276242	0.155099	0.364856	-1.97412	4.17269	KIF2C
anatomical structure homeostasis (GO:0060249)	2/36	0.0428096	0.195467	0.0670838	0.326723	-1.32192	4.16538	PCNA;RPA1
histone phosphorylation (GO:0016572)	1/10	0.0878419	0.251113	0.116245	0.342741	-1.71017	4.15951	CDK2
positive regulation of receptor biosynthetic process (GO:0010870)	1/12	0.104467	0.267785	0.135889	0.359545	-1.84088	4.15834	HDAC2
positive regulation of actin filament bundle assembly (GO:0032233)	2/45	0.0638039	0.238358	0.0967572	0.342741	-1.51052	4.15686	FHOD1;ARHGEF10L
mitotic spindle organization (GO:0007052)	3/75	0.0314833	0.158623	0.0566856	0.290045	-1.19955	4.14841	PRC1;STMN1;RAN
regulation of actomyosin structure organization (GO:0110020)	1/13	0.112666	0.272345	0.145547	0.361122	-1.89206	4.131	FHOD1
antigen processing and presentation of exogenous peptide antigen (GO:0002478)	3/98	0.0610349	0.235519	0.103623	0.342741	-1.47525	4.12524	KIF2C;AP1M1;KIF15
negative regulation of signal transduction by p53 class mediator (GO:1901797)	1/16	0.136818	0.288788	0.173884	0.374848	-2.07311	4.12363	SIRT1
regulation of granulocyte chemotaxis (GO:0071622)	1/14	0.12079	0.276242	0.155099	0.364856	-1.94866	4.11887	CAMK1D
intra-S DNA damage checkpoint (GO:0031573)	1/16	0.136818	0.288788	0.173884	0.374848	-2.06874	4.11495	MSH2
pyrimidine nucleoside salvage (GO:0043097)	1/13	0.112666	0.272345	0.145547	0.361122	-1.88177	4.10852	TK1
purine nucleoside monophosphate biosynthetic process (GO:0009127)	1/13	0.112666	0.272345	0.145547	0.361122	-1.87706	4.09824	PAICS
pyrimidine-containing compound metabolic process (GO:0072527)	1/16	0.136818	0.288788	0.173884	0.374848	-2.04573	4.06917	ERH
regulation of mitotic cell cycle spindle assembly checkpoint (GO:0090266)	1/15	0.128841	0.282847	0.164544	0.371778	-1.98478	4.06717	MAD2L1
histone H2B ubiquitination (GO:0033523)	1/11	0.0961923	0.264077	0.126122	0.356667	-1.73421	4.06049	CTR9
interleukin-12-mediated signaling pathway (GO:0035722)	2/47	0.0688575	0.245257	0.103781	0.342741	-1.51359	4.04993	LMNB1;SOD1
negative regulation of protein oligomerization (GO:0032460)	1/13	0.112666	0.272345	0.145547	0.361122	-1.85458	4.04917	EP300
signal transduction involved in G2 DNA damage checkpoint (GO:0072425)	1/13	0.112666	0.272345	0.145547	0.361122	-1.85064	4.04055	PLK1
regulation of intrinsic apoptotic signaling pathway in response to DNA damage by p53 class mediator (GO:1902165)	1/13	0.112666	0.272345	0.145547	0.361122	-1.84894	4.03685	SIRT1
endodermal cell fate commitment (GO:0001711)	1/9	0.0794148	0.247465	0.106257	0.342741	-1.5892	4.02555	CTR9
regulation of water loss via skin (GO:0033561)	1/17	0.144722	0.294142	0.18312	0.380849	-2.08143	4.02328	STMN1
positive regulation of DNA metabolic process (GO:0051054)	3/83	0.0406531	0.188982	0.0715832	0.339754	-1.25347	4.01446	PCNA;TRIM28;SIRT1
response to peptide hormone (GO:0043434)	2/41	0.0541032	0.227303	0.0831521	0.342741	-1.36794	3.9901	CREB1;SIRT1
response to hydrogen peroxide (GO:0042542)	2/44	0.0613267	0.235519	0.0932987	0.342741	-1.42932	3.98999	SIRT1;SOD1
positive regulation of stress fiber assembly (GO:0051496)	2/38	0.0472099	0.207629	0.0733765	0.339754	-1.30635	3.98848	FHOD1;ARHGEF10L
establishment of skin barrier (GO:0061436)	1/17	0.144722	0.294142	0.18312	0.380849	-2.06236	3.98642	STMN1
nucleoside catabolic process (GO:0009164)	1/13	0.112666	0.272345	0.145547	0.361122	-1.81828	3.9699	DERA
adaptive immune response based on somatic recombination of immune receptors built from immunoglobulin superfamily domains (GO:0002460)	1/15	0.128841	0.282847	0.164544	0.371778	-1.93135	3.95768	MSH2
mesenchymal cell differentiation (GO:0048762)	2/42	0.0564755	0.235519	0.0864948	0.342741	-1.37163	3.94198	TRIM28;HNRNPAB
negative regulation of nucleic acid-templated transcription (GO:1903507)	9/445	0.0216299	0.122802	0.0685089	0.330595	-1.02788	3.94055	BCLAF1;HDAC2;SFPQ;TRIM28;PSPC1;HMGB2;LANCL2;LRRFIP1;SIRT1
antigen processing and presentation of peptide antigen via MHC class II (GO:0002495)	3/99	0.0625355	0.235628	0.105933	0.342741	-1.42113	3.93939	KIF2C;AP1M1;KIF15
cellular response to interleukin-4 (GO:0071353)	1/10	0.0878419	0.251113	0.116245	0.342741	-1.61482	3.92759	STAT6
negative regulation of hemopoiesis (GO:1903707)	1/15	0.128841	0.282847	0.164544	0.371778	-1.91593	3.92608	CTR9
carbohydrate derivative catabolic process (GO:1901136)	1/12	0.104467	0.267785	0.135889	0.359545	-1.73174	3.91179	DERA
myeloid cell development (GO:0061515)	1/16	0.136818	0.288788	0.173884	0.374848	-1.96564	3.90987	EVI2B
regulation of ATP metabolic process (GO:1903578)	2/44	0.0613267	0.235519	0.0932987	0.342741	-1.4	3.90814	NUP155;NUP50
regulation of protein glycosylation (GO:0060049)	1/13	0.112666	0.272345	0.145547	0.361122	-1.78673	3.90103	HPF1
RNA interference (GO:0016246)	1/14	0.12079	0.276242	0.155099	0.364856	-1.84306	3.89568	TSN
regulation of mRNA polyadenylation (GO:1900363)	1/12	0.104467	0.267785	0.135889	0.359545	-1.72052	3.88645	CTR9
cellular response to hypoxia (GO:0071456)	4/133	0.0340054	0.168109	0.0674898	0.327488	-1.14396	3.86799	HP1BP3;EP300;PSMD1;SIRT1
positive regulation of mRNA metabolic process (GO:1903313)	1/13	0.112666	0.272345	0.145547	0.361122	-1.76217	3.84739	GTPBP1
signal transduction involved in DNA damage checkpoint (GO:0072422)	1/14	0.12079	0.276242	0.155099	0.364856	-1.81827	3.84327	PLK1
negative regulation of cell aging (GO:0090344)	1/16	0.136818	0.288788	0.173884	0.374848	-1.93094	3.84084	SIRT1
positive regulation of CREB transcription factor activity (GO:0032793)	1/16	0.136818	0.288788	0.173884	0.374848	-1.92965	3.83828	CAMK1D
nucleotide-excision repair, DNA incision (GO:0033683)	2/41	0.0541032	0.227303	0.0831521	0.342741	-1.31456	3.83439	PCNA;RPA1
positive regulation of macromolecule biosynthetic process (GO:0010557)	4/143	0.0425501	0.195467	0.0825736	0.342741	-1.21453	3.83435	HDAC2;PCNA;CIRBP;SIRT1
negative regulation of intrinsic apoptotic signaling pathway by p53 class mediator (GO:1902254)	1/15	0.128841	0.282847	0.164544	0.371778	-1.86871	3.82932	SIRT1
positive regulation of cellular response to insulin stimulus (GO:1900078)	1/16	0.136818	0.288788	0.173884	0.374848	-1.9192	3.81749	SIRT1
purine ribonucleoside monophosphate metabolic process (GO:0009167)	2/40	0.0517676	0.222465	0.0798505	0.342741	-1.28806	3.81394	PAICS;CLPX
positive regulation of cholesterol efflux (GO:0010875)	1/14	0.12079	0.276242	0.155099	0.364856	-1.80268	3.81032	SIRT1
spliceosomal snRNP assembly (GO:0000387)	2/38	0.0472099	0.207629	0.0733765	0.339754	-1.24755	3.80896	PRPF6;PRPF31
DNA strand elongation (GO:0022616)	1/14	0.12079	0.276242	0.155099	0.364856	-1.80116	3.8071	POLA1
calcineurin-mediated signaling (GO:0097720)	1/13	0.112666	0.272345	0.145547	0.361122	-1.74186	3.80306	NFATC2
G-protein coupled acetylcholine receptor signaling pathway (GO:0007213)	1/17	0.144722	0.294142	0.18312	0.380849	-1.966	3.80016	GRK2
negative regulation of Rho protein signal transduction (GO:0035024)	1/15	0.128841	0.282847	0.164544	0.371778	-1.85105	3.79314	STMN1
positive regulation of histone H3-K4 methylation (GO:0051571)	1/14	0.12079	0.276242	0.155099	0.364856	-1.79086	3.78533	CTR9
negative regulation of adherens junction organization (GO:1903392)	1/16	0.136818	0.288788	0.173884	0.374848	-1.89794	3.77521	RCC2
pentose-phosphate shunt (GO:0006098)	1/13	0.112666	0.272345	0.145547	0.361122	-1.72904	3.77507	DERA
regulation of receptor biosynthetic process (GO:0010869)	1/12	0.104467	0.267785	0.135889	0.359545	-1.67109	3.7748	HDAC2
regulation of carbohydrate catabolic process (GO:0043470)	2/38	0.0472099	0.207629	0.0733765	0.339754	-1.23343	3.76586	NUP155;NUP50
myelination in peripheral nervous system (GO:0022011)	1/14	0.12079	0.276242	0.155099	0.364856	-1.77925	3.76079	SOD1
cellular response to osmotic stress (GO:0071470)	1/15	0.128841	0.282847	0.164544	0.371778	-1.82876	3.74745	ARHGEF2
response to ethanol (GO:0045471)	1/15	0.128841	0.282847	0.164544	0.371778	-1.82026	3.73004	SOD1
regulation of translation (GO:0006417)	5/214	0.0471972	0.207629	0.0990239	0.342741	-1.22096	3.72812	NUP155;NCL;NUP50;CIRBP;RAN
regulation of DNA-templated transcription in response to stress (GO:0043620)	1/14	0.12079	0.276242	0.155099	0.364856	-1.7519	3.70298	BCLAF1
regulation of superoxide anion generation (GO:0032928)	1/14	0.12079	0.276242	0.155099	0.364856	-1.74246	3.68303	SOD1
regulation of mitotic nuclear division (GO:0007088)	3/85	0.0431341	0.196268	0.0755564	0.342741	-1.16977	3.6771	PLK1;NUSAP1;MKI67
positive regulation of gene expression, epigenetic (GO:0045815)	2/48	0.0714323	0.245257	0.107345	0.342741	-1.38364	3.65144	EP300;DEK
DNA replication-independent nucleosome organization (GO:0034724)	1/14	0.12079	0.276242	0.155099	0.364856	-1.72445	3.64497	ASF1B
regulation of cytoskeleton organization (GO:0051493)	3/96	0.0580855	0.235519	0.0990645	0.342741	-1.27966	3.6417	STMN1;MAPK1;CORO1A
pyrimidine nucleoside metabolic process (GO:0006213)	1/16	0.136818	0.288788	0.173884	0.374848	-1.83	3.64006	ERH
protein K48-linked ubiquitination (GO:0070936)	2/49	0.074038	0.247465	0.11094	0.342741	-1.39612	3.63435	UBE2C;UBE2G1
negative regulation of gene expression (GO:0010629)	11/619	0.0274464	0.142656	0.0951385	0.342741	-1.0087	3.62681	BCLAF1;HDAC2;SFPQ;TRIM28;PSPC1;NCL;HMGB2;LANCL2;LRRFIP1;TARDBP;SIRT1
nucleoside salvage (GO:0043174)	1/15	0.128841	0.282847	0.164544	0.371778	-1.76632	3.61951	TK1
activation of MAPK activity (GO:0000187)	4/118	0.023243	0.127442	0.0478481	0.255773	-0.958278	3.6048	C5AR1;CDK1;MAPK1;SOD1
regulation of mRNA metabolic process (GO:1903311)	1/16	0.136818	0.288788	0.173884	0.374848	-1.8083	3.59689	CDK11B
thymus development (GO:0048538)	1/15	0.128841	0.282847	0.164544	0.371778	-1.75336	3.59294	SOD1
placenta development (GO:0001890)	1/14	0.12079	0.276242	0.155099	0.364856	-1.69961	3.59247	SOD1
iron-sulfur cluster assembly (GO:0016226)	1/19	0.160316	0.306863	0.201286	0.393301	-1.96234	3.59227	NFU1
nucleus organization (GO:0006997)	2/46	0.0663144	0.245257	0.100252	0.342741	-1.32303	3.58984	NUMA1;NUP155
miRNA metabolic process (GO:0010586)	1/17	0.144722	0.294142	0.18312	0.380849	-1.85076	3.5774	RAN
regulation of stem cell proliferation (GO:0072091)	1/17	0.144722	0.294142	0.18312	0.380849	-1.84791	3.5719	HMGB2
negative regulation of mRNA splicing, via spliceosome (GO:0048025)	1/14	0.12079	0.276242	0.155099	0.364856	-1.67528	3.54103	SRSF6
establishment of mitotic spindle orientation (GO:0000132)	1/15	0.128841	0.282847	0.164544	0.371778	-1.72442	3.53365	NUMA1
Fc-gamma receptor signaling pathway involved in phagocytosis (GO:0038096)	4/134	0.0348102	0.168292	0.068928	0.330804	-1.05031	3.52678	ACTR2;ELMO1;MAPK1;WASF2
pyrimidine nucleoside biosynthetic process (GO:0046134)	1/16	0.136818	0.288788	0.173884	0.374848	-1.77299	3.52666	TK1
negative regulation of cellular macromolecule biosynthetic process (GO:2000113)	10/513	0.0199758	0.117201	0.0686331	0.330595	-0.899797	3.52112	BCLAF1;HDAC2;SFPQ;TRIM28;PSPC1;NCL;HMGB2;LANCL2;LRRFIP1;SIRT1
positive regulation of cellular protein metabolic process (GO:0032270)	3/92	0.0523969	0.223708	0.0902029	0.342741	-1.19376	3.52028	HDAC2;PLK1;CIRBP
positive regulation of collagen metabolic process (GO:0010714)	1/16	0.136818	0.288788	0.173884	0.374848	-1.75589	3.49266	HDAC2
regulation of keratinocyte proliferation (GO:0010837)	1/19	0.160316	0.306863	0.201286	0.393301	-1.90697	3.49091	SRSF6
regulation of RNA metabolic process (GO:0051252)	2/40	0.0517676	0.222465	0.0798505	0.342741	-1.17522	3.47983	SON;PQBP1
response to ionizing radiation (GO:0010212)	3/78	0.0347794	0.168292	0.0620816	0.306907	-1.03419	3.47356	MSH2;TOPBP1;SIRT1
regulation of cell development (GO:0060284)	1/21	0.175626	0.31899	0.21905	0.405136	-1.996	3.47183	HMGB2
negative regulation of peptidyl-serine phosphorylation (GO:0033137)	1/19	0.160316	0.306863	0.201286	0.393301	-1.89183	3.4632	RASSF2
neutrophil activation involved in immune response (GO:0002283)	9/484	0.0344435	0.168292	0.10126	0.342741	-1.02643	3.45746	ACTR2;C5AR1;COTL1;MAPK1;PSMD1;KCNAB2;TUBB4B;AP1M1;DERA
RNA stabilization (GO:0043489)	1/18	0.152555	0.299864	0.192254	0.385975	-1.82566	3.43267	CIRBP
protein mannosylation (GO:0035268)	1/18	0.152555	0.299864	0.192254	0.385975	-1.82283	3.42734	DPY19L1
regulation of exit from mitosis (GO:0007096)	1/16	0.136818	0.288788	0.173884	0.374848	-1.72251	3.42625	UBE2C
regulation of generation of precursor metabolites and energy (GO:0043467)	2/47	0.0688575	0.245257	0.103781	0.342741	-1.27755	3.41837	NUP155;NUP50
cellular response to interleukin-12 (GO:0071349)	2/47	0.0688575	0.245257	0.103781	0.342741	-1.27586	3.41385	LMNB1;SOD1
ribonucleoside monophosphate biosynthetic process (GO:0009156)	1/15	0.128841	0.282847	0.164544	0.371778	-1.66592	3.41378	PAICS
apoptotic DNA fragmentation (GO:0006309)	1/16	0.136818	0.288788	0.173884	0.374848	-1.70344	3.38832	HMGB2
regulation of transcription from RNA polymerase I promoter (GO:0006356)	1/18	0.152555	0.299864	0.192254	0.385975	-1.80142	3.38708	PHF8
odontogenesis of dentin-containing tooth (GO:0042475)	1/17	0.144722	0.294142	0.18312	0.380849	-1.75125	3.38506	HDAC2
negative regulation of androgen receptor signaling pathway (GO:0060766)	1/13	0.112666	0.272345	0.145547	0.361122	-1.55038	3.38498	SIRT1
polyol metabolic process (GO:0019751)	2/48	0.0714323	0.245257	0.107345	0.342741	-1.28255	3.38466	INPP5D;NUDT4
regulation of cellular carbohydrate metabolic process (GO:0010675)	1/14	0.12079	0.276242	0.155099	0.364856	-1.59902	3.37984	SIRT1
regulation of mRNA catabolic process (GO:0061013)	1/15	0.128841	0.282847	0.164544	0.371778	-1.64928	3.37967	GTPBP1
pyrimidine-containing compound salvage (GO:0008655)	1/13	0.112666	0.272345	0.145547	0.361122	-1.54247	3.36773	TK1
negative regulation of chromatin silencing (GO:0031936)	1/10	0.0878419	0.251113	0.116245	0.342741	-1.38206	3.36146	PHF8
positive regulation of proteolysis (GO:0045862)	2/53	0.0847547	0.251113	0.125625	0.356667	-1.36018	3.35691	HDAC2;PLK1
cellular response to oxidative stress (GO:0034599)	3/116	0.0905539	0.257189	0.148057	0.364856	-1.39635	3.35376	TXNL1;MAPK1;SOD1
DNA replication checkpoint (GO:0000076)	1/18	0.152555	0.299864	0.192254	0.385975	-1.78267	3.35184	TOPBP1
regulation of Rho protein signal transduction (GO:0035023)	2/58	0.0987569	0.267785	0.144578	0.361122	-1.44583	3.34724	STMN1;ARHGEF2
positive regulation of transcription elongation from RNA polymerase II promoter (GO:0032968)	1/16	0.136818	0.288788	0.173884	0.374848	-1.67325	3.32827	CTR9
positive regulation of protein localization to cell periphery (GO:1904377)	2/47	0.0688575	0.245257	0.103781	0.342741	-1.23783	3.31208	NUMA1;EPB41
positive regulation of metabolic process (GO:0009893)	1/19	0.160316	0.306863	0.201286	0.393301	-1.80827	3.31024	CAMK1D
response to X-ray (GO:0010165)	1/16	0.136818	0.288788	0.173884	0.374848	-1.65926	3.30044	MSH2
mitotic G1/S transition checkpoint (GO:0044819)	1/11	0.0961923	0.264077	0.126122	0.356667	-1.40129	3.28098	CDK2
Fc receptor mediated stimulatory signaling pathway (GO:0002431)	4/136	0.0364529	0.173372	0.0718515	0.339754	-0.98718	3.26928	ACTR2;ELMO1;MAPK1;WASF2
epithelium development (GO:0060429)	3/116	0.0905539	0.257189	0.148057	0.364856	-1.35816	3.26204	PCNA;CDK1;TAGLN2
peptidyl-threonine dephosphorylation (GO:0035970)	1/17	0.144722	0.294142	0.18312	0.380849	-1.6859	3.25875	PPM1G
regulation of nucleocytoplasmic transport (GO:0046822)	1/15	0.128841	0.282847	0.164544	0.371778	-1.58324	3.24434	NUDT4
regulation of actin nucleation (GO:0051125)	1/17	0.144722	0.294142	0.18312	0.380849	-1.66932	3.2267	CORO1A
regulation of transcription factor import into nucleus (GO:0042990)	1/20	0.168006	0.312487	0.210218	0.398195	-1.80169	3.21377	TRIM28
protein phosphorylation (GO:0006468)	9/471	0.0297019	0.151387	0.0894824	0.342741	-0.912105	3.20746	CAMK1D;CREB1;GRK2;CSNK2A1;CDK2;PLK1;CDK1;MAPK1;CDK11B
3'-UTR-mediated mRNA stabilization (GO:0070935)	1/18	0.152555	0.299864	0.192254	0.385975	-1.69374	3.18463	TARDBP
ribose phosphate metabolic process (GO:0019693)	1/13	0.112666	0.272345	0.145547	0.361122	-1.44306	3.15067	DERA
negative regulation of microtubule depolymerization (GO:0007026)	1/19	0.160316	0.306863	0.201286	0.393301	-1.71786	3.14472	ARHGEF2
acetylcholine receptor signaling pathway (GO:0095500)	1/20	0.168006	0.312487	0.210218	0.398195	-1.74439	3.11157	GRK2
phosphorylation (GO:0016310)	7/387	0.0657021	0.244148	0.152488	0.364856	-1.14162	3.10821	CREB1;CSNK2A1;CDK2;PLK1;CDK1;MAPK1;CDK11B
L-serine metabolic process (GO:0006563)	1/12	0.104467	0.267785	0.135889	0.359545	-1.37509	3.10618	SERINC3
regulation of cholesterol efflux (GO:0010874)	1/19	0.160316	0.306863	0.201286	0.393301	-1.68874	3.09142	SIRT1
negative regulation of hydrolase activity (GO:0051346)	3/109	0.0784601	0.247465	0.130095	0.359545	-1.21376	3.08923	RCC2;GMIP;SIRT1
negative regulation of DNA damage response, signal transduction by p53 class mediator (GO:0043518)	1/13	0.112666	0.272345	0.145547	0.361122	-1.41141	3.08157	SIRT1
anion homeostasis (GO:0055081)	1/19	0.160316	0.306863	0.201286	0.393301	-1.68161	3.07838	SIRT1
positive regulation of mitotic cell cycle (GO:0045931)	2/53	0.0847547	0.251113	0.125625	0.356667	-1.24141	3.0638	NUSAP1;MAD2L1
mitotic DNA integrity checkpoint (GO:0044774)	1/14	0.12079	0.276242	0.155099	0.364856	-1.44772	3.06004	TOPBP1
cellular response to dsRNA (GO:0071359)	1/17	0.144722	0.294142	0.18312	0.380849	-1.58241	3.0587	PQBP1
regulation of glycolytic process (GO:0006110)	2/58	0.0987569	0.267785	0.144578	0.361122	-1.32009	3.05612	NUP155;NUP50
positive regulation of cholesterol transport (GO:0032376)	1/18	0.152555	0.299864	0.192254	0.385975	-1.62133	3.04848	SIRT1
heart contraction (GO:0060047)	2/45	0.0638039	0.238358	0.0967572	0.342741	-1.09717	3.01933	GRK2;SOD1
mRNA transcription (GO:0009299)	1/22	0.183177	0.322893	0.227785	0.409763	-1.77863	3.01886	C5AR1
regulation of neuron migration (GO:2001222)	1/20	0.168006	0.312487	0.210218	0.398195	-1.69121	3.01671	ARHGEF2
regulation of megakaryocyte differentiation (GO:0045652)	2/50	0.0766738	0.247465	0.114567	0.342741	-1.17049	3.00605	HMGB2;EP300
response to nicotine (GO:0035094)	1/22	0.183177	0.322893	0.227785	0.409763	-1.75979	2.98689	MAPK1
telomere maintenance (GO:0000723)	2/52	0.0820329	0.251113	0.12191	0.356667	-1.19412	2.98605	PCNA;RPA1
folic acid metabolic process (GO:0046655)	1/20	0.168006	0.312487	0.210218	0.398195	-1.66936	2.97773	MTHFD1L
positive regulation of epidermal cell differentiation (GO:0045606)	1/18	0.152555	0.299864	0.192254	0.385975	-1.58255	2.97555	NUMA1
protein stabilization (GO:0050821)	4/153	0.0521986	0.223587	0.0991704	0.342741	-1.00514	2.96787	CREB1;RASSF2;RPL11;EP300
regulation of histone H3-K4 methylation (GO:0051569)	1/17	0.144722	0.294142	0.18312	0.380849	-1.52903	2.95553	CTR9
protein deacylation (GO:0035601)	1/17	0.144722	0.294142	0.18312	0.380849	-1.52868	2.95485	SIRT1
growth hormone receptor signaling pathway (GO:0060396)	1/21	0.175626	0.31899	0.21905	0.405136	-1.69827	2.95396	MAPK1
negative regulation of RNA splicing (GO:0033119)	1/19	0.160316	0.306863	0.201286	0.393301	-1.60893	2.94533	SRSF6
regulation of multicellular organism growth (GO:0040014)	1/18	0.152555	0.299864	0.192254	0.385975	-1.56624	2.94489	SOD1
negative regulation of cell junction assembly (GO:1901889)	1/20	0.168006	0.312487	0.210218	0.398195	-1.64234	2.92953	RCC2
regulation of collagen biosynthetic process (GO:0032965)	1/18	0.152555	0.299864	0.192254	0.385975	-1.55733	2.92815	HDAC2
positive regulation of defense response to virus by host (GO:0002230)	1/22	0.183177	0.322893	0.227785	0.409763	-1.72515	2.9281	PQBP1
negative regulation of proteolysis involved in cellular protein catabolic process (GO:1903051)	1/20	0.168006	0.312487	0.210218	0.398195	-1.63907	2.9237	RPL11
natural killer cell activation involved in immune response (GO:0002323)	1/21	0.175626	0.31899	0.21905	0.405136	-1.67939	2.92113	CORO1A
regulation of cell cycle phase transition (GO:1901987)	1/17	0.144722	0.294142	0.18312	0.380849	-1.50862	2.91608	PLK1
ubiquitin-dependent protein catabolic process (GO:0006511)	7/342	0.0383077	0.180515	0.0965713	0.342741	-0.89199	2.90976	UBE2C;CDK1;PSMD1;UBE2G1;BUB3;SIRT1;MAD2L1
cellular response to inorganic substance (GO:0071241)	1/18	0.152555	0.299864	0.192254	0.385975	-1.52982	2.87642	CDK2
negative regulation of steroid biosynthetic process (GO:0010894)	1/17	0.144722	0.294142	0.18312	0.380849	-1.48226	2.86513	SOD1
embryonic cranial skeleton morphogenesis (GO:0048701)	1/16	0.136818	0.288788	0.173884	0.374848	-1.43926	2.86285	MTHFD1L
regulation of RNA export from nucleus (GO:0046831)	1/16	0.136818	0.288788	0.173884	0.374848	-1.43836	2.86104	NUDT4
peptidyl-lysine trimethylation (GO:0018023)	1/18	0.152555	0.299864	0.192254	0.385975	-1.51303	2.84485	CTR9
regulation of Golgi organization (GO:1903358)	1/15	0.128841	0.282847	0.164544	0.371778	-1.37753	2.8228	MAPK1
Rac protein signal transduction (GO:0016601)	1/20	0.168006	0.312487	0.210218	0.398195	-1.58216	2.82218	ELMO1
regulation of adaptive immune response (GO:0002819)	1/15	0.128841	0.282847	0.164544	0.371778	-1.35997	2.78682	SIRT1
positive regulation of BMP signaling pathway (GO:0030513)	1/22	0.183177	0.322893	0.227785	0.409763	-1.64064	2.78466	NUMA1
regulation of RNA splicing (GO:0043484)	2/56	0.0930802	0.263227	0.136924	0.360832	-1.16838	2.77407	SON;PQBP1
positive regulation of telomere capping (GO:1904355)	1/18	0.152555	0.299864	0.192254	0.385975	-1.47401	2.77147	MAPK1
negative regulation of protein depolymerization (GO:1901880)	1/21	0.175626	0.31899	0.21905	0.405136	-1.59287	2.77064	ARHGEF2
negative regulation of phosphate metabolic process (GO:0045936)	1/20	0.168006	0.312487	0.210218	0.398195	-1.54731	2.76002	SIRT1
protein ubiquitination (GO:0016567)	9/507	0.0440692	0.199831	0.124179	0.356667	-0.877833	2.74059	PCNA;UHRF2;UBE2C;CTR9;PLK1;PSMD1;UBE2G1;SAE1;SIRT1
positive regulation of biosynthetic process (GO:0009891)	1/23	0.19066	0.330762	0.236422	0.416192	-1.63792	2.71446	CREB1
positive regulation of chromosome organization (GO:2001252)	1/20	0.168006	0.312487	0.210218	0.398195	-1.52032	2.71188	NUMA1
positive regulation of transcription of Notch receptor target (GO:0007221)	1/18	0.152555	0.299864	0.192254	0.385975	-1.44195	2.7112	EP300
covalent chromatin modification (GO:0016569)	1/21	0.175626	0.31899	0.21905	0.405136	-1.55215	2.6998	SIRT1
positive regulation of response to stimulus (GO:0048584)	2/55	0.0902791	0.257189	0.133132	0.359545	-1.12181	2.69777	BCLAF1;SIRT1
positive regulation of DNA-templated transcription, initiation (GO:2000144)	1/17	0.144722	0.294142	0.18312	0.380849	-1.38839	2.68368	BCLAF1
regulation of early endosome to late endosome transport (GO:2000641)	1/18	0.152555	0.299864	0.192254	0.385975	-1.42523	2.67976	MAPK1
histone lysine demethylation (GO:0070076)	1/22	0.183177	0.322893	0.227785	0.409763	-1.57387	2.67132	PHF8
response to light stimulus (GO:0009416)	2/59	0.101631	0.267785	0.148438	0.364856	-1.16669	2.66753	CIRBP;PCLAF
nucleotide-excision repair, preincision complex stabilization (GO:0006293)	1/22	0.183177	0.322893	0.227785	0.409763	-1.56147	2.65029	RPA1
organelle disassembly (GO:1903008)	1/21	0.175626	0.31899	0.21905	0.405136	-1.52268	2.64855	CDK1
immune response-activating cell surface receptor signaling pathway (GO:0002429)	1/21	0.175626	0.31899	0.21905	0.405136	-1.52082	2.64532	C5AR1
regulation of cellular macromolecule biosynthetic process (GO:2000112)	10/632	0.0657251	0.244148	0.181549	0.380849	-0.966183	2.63021	SFPQ;PSPC1;CTR9;HP1BP3;HMGB2;EP300;HMGB3;NFATC2;CDK11B;RPL6
folic acid-containing compound metabolic process (GO:0006760)	1/24	0.198074	0.33479	0.244963	0.418347	-1.62249	2.627	MTHFD1L
focal adhesion assembly (GO:0048041)	1/19	0.160316	0.306863	0.201286	0.393301	-1.43154	2.62059	RCC2
regulation of organelle organization (GO:0033043)	3/114	0.0870225	0.251113	0.142844	0.361122	-1.07331	2.62059	STMN1;MAPK1;PARL
nuclear transport (GO:0051169)	1/23	0.19066	0.330762	0.236422	0.416192	-1.57837	2.61577	ANP32E
inositol phosphate-mediated signaling (GO:0048016)	1/21	0.175626	0.31899	0.21905	0.405136	-1.49721	2.60423	NFATC2
negative regulation of protein tyrosine kinase activity (GO:0061099)	1/22	0.183177	0.322893	0.227785	0.409763	-1.5313	2.59908	SH3BP5
positive regulation of lamellipodium organization (GO:1902745)	1/22	0.183177	0.322893	0.227785	0.409763	-1.52881	2.59485	WASF2
hydrogen peroxide metabolic process (GO:0042743)	1/21	0.175626	0.31899	0.21905	0.405136	-1.48835	2.58883	SOD1
positive chemotaxis (GO:0050918)	1/18	0.152555	0.299864	0.192254	0.385975	-1.37619	2.58755	CORO1A
establishment of spindle orientation (GO:0051294)	1/22	0.183177	0.322893	0.227785	0.409763	-1.52362	2.58603	NUMA1
regulation of microtubule depolymerization (GO:0031114)	1/23	0.19066	0.330762	0.236422	0.416192	-1.56007	2.58545	ARHGEF2
positive regulation of MAP kinase activity (GO:0043406)	4/178	0.0810567	0.251113	0.146651	0.363175	-1.02628	2.57863	C5AR1;CDK1;MAPK1;SOD1
regulation of nuclear division (GO:0051783)	1/22	0.183177	0.322893	0.227785	0.409763	-1.51169	2.5658	MKI67
cellular protein complex localization (GO:0034629)	1/22	0.183177	0.322893	0.227785	0.409763	-1.50901	2.56124	RCC2
regulation of regulatory T cell differentiation (GO:0045589)	1/21	0.175626	0.31899	0.21905	0.405136	-1.47025	2.55735	NFATC2
regulation of cellular ketone metabolic process (GO:0010565)	2/62	0.110389	0.272345	0.16014	0.371778	-1.16	2.55634	PSMD1;SIRT1
negative regulation of myeloid cell differentiation (GO:0045638)	1/23	0.19066	0.330762	0.236422	0.416192	-1.54125	2.55426	CTR9
maturation of 5.8S rRNA from tricistronic rRNA transcript (SSU-rRNA, 5.8S rRNA, LSU-rRNA) (GO:0000466)	1/20	0.168006	0.312487	0.210218	0.398195	-1.4316	2.55363	WDR12
cellular response to interleukin-6 (GO:0071354)	1/24	0.198074	0.33479	0.244963	0.418347	-1.57585	2.55149	CTR9
DNA catabolic process, endonucleolytic (GO:0000737)	1/23	0.19066	0.330762	0.236422	0.416192	-1.53937	2.55114	HMGB2
cell-substrate adherens junction assembly (GO:0007045)	1/19	0.160316	0.306863	0.201286	0.393301	-1.39305	2.55013	RCC2
regulation of microtubule polymerization or depolymerization (GO:0031110)	1/19	0.160316	0.306863	0.201286	0.393301	-1.3925	2.54913	STMN1
negative regulation of macromolecule biosynthetic process (GO:0010558)	1/21	0.175626	0.31899	0.21905	0.405136	-1.4645	2.54735	HDAC2
negative regulation of protein modification process (GO:0031400)	2/64	0.116335	0.276242	0.168033	0.374848	-1.18062	2.53986	TARDBP;SIRT1
protein ADP-ribosylation (GO:0006471)	1/20	0.168006	0.312487	0.210218	0.398195	-1.41664	2.52693	HPF1
regulation of spindle organization (GO:0090224)	1/19	0.160316	0.306863	0.201286	0.393301	-1.37844	2.52338	NUMA1
positive regulation of transcription from RNA polymerase II promoter involved in cellular response to chemical stimulus (GO:1901522)	1/22	0.183177	0.322893	0.227785	0.409763	-1.48452	2.51967	EP300
regulation of lamellipodium assembly (GO:0010591)	1/26	0.212699	0.342769	0.261762	0.428664	-1.62394	2.51365	WASF2
interleukin-6-mediated signaling pathway (GO:0070102)	1/15	0.128841	0.282847	0.164544	0.371778	-1.22342	2.50702	CTR9
purine ribonucleotide catabolic process (GO:0009154)	1/20	0.168006	0.312487	0.210218	0.398195	-1.40415	2.50465	NUDT4
negative regulation of double-strand break repair (GO:2000780)	1/20	0.168006	0.312487	0.210218	0.398195	-1.4018	2.50046	HELB
cell chemotaxis (GO:0060326)	2/61	0.107448	0.272345	0.15622	0.366838	-1.11511	2.48752	C5AR1;HMGB2
mitotic G2 DNA damage checkpoint (GO:0007095)	1/18	0.152555	0.299864	0.192254	0.385975	-1.32054	2.48292	TOPBP1
STAT cascade (GO:0097696)	1/23	0.19066	0.330762	0.236422	0.416192	-1.49301	2.47431	CTR9
embryonic digit morphogenesis (GO:0042733)	1/17	0.144722	0.294142	0.18312	0.380849	-1.27155	2.45784	HDAC2
nucleotide-excision repair, DNA duplex unwinding (GO:0000717)	1/23	0.19066	0.330762	0.236422	0.416192	-1.48	2.45276	RAD23B
NADP metabolic process (GO:0006739)	1/20	0.168006	0.312487	0.210218	0.398195	-1.36982	2.44341	DERA
regulation of viral release from host cell (GO:1902186)	1/26	0.212699	0.342769	0.261762	0.428664	-1.57312	2.435	TRIM28
JAK-STAT cascade involved in growth hormone signaling pathway (GO:0060397)	1/16	0.136818	0.288788	0.173884	0.374848	-1.22216	2.431	MAPK1
regulation of mitotic spindle assembly (GO:1901673)	1/20	0.168006	0.312487	0.210218	0.398195	-1.35473	2.4165	PLK1
positive regulation of collagen biosynthetic process (GO:0032967)	1/16	0.136818	0.288788	0.173884	0.374848	-1.21427	2.41531	HDAC2
regulation of DNA-templated transcription, elongation (GO:0032784)	1/21	0.175626	0.31899	0.21905	0.405136	-1.3882	2.41463	HTATSF1
cortical actin cytoskeleton organization (GO:0030866)	1/22	0.183177	0.322893	0.227785	0.409763	-1.4207	2.41135	FMNL1
nucleotide-excision repair, DNA damage recognition (GO:0000715)	1/24	0.198074	0.33479	0.244963	0.418347	-1.48456	2.40367	RAD23B
glucose 6-phosphate metabolic process (GO:0051156)	1/17	0.144722	0.294142	0.18312	0.380849	-1.24339	2.4034	DERA
apoptotic nuclear changes (GO:0030262)	1/24	0.198074	0.33479	0.244963	0.418347	-1.48011	2.39647	HMGB2
glyceraldehyde-3-phosphate metabolic process (GO:0019682)	1/19	0.160316	0.306863	0.201286	0.393301	-1.30608	2.39093	DERA
viral entry into host cell (GO:0046718)	1/18	0.152555	0.299864	0.192254	0.385975	-1.271	2.38979	GRK2
cellular response to light stimulus (GO:0071482)	2/67	0.1254	0.282847	0.179994	0.380849	-1.14993	2.38755	PCNA;EP300
Arp2/3 complex-mediated actin nucleation (GO:0034314)	1/21	0.175626	0.31899	0.21905	0.405136	-1.36979	2.3826	ACTR2
positive regulation of erythrocyte differentiation (GO:0045648)	1/23	0.19066	0.330762	0.236422	0.416192	-1.43582	2.37953	HMGB2
regulation of necroptotic process (GO:0060544)	1/17	0.144722	0.294142	0.18312	0.380849	-1.23071	2.37889	ARHGEF2
negative regulation of cyclin-dependent protein kinase activity (GO:1904030)	1/22	0.183177	0.322893	0.227785	0.409763	-1.39493	2.36762	PLK1
positive regulation of protein autophosphorylation (GO:0031954)	1/23	0.19066	0.330762	0.236422	0.416192	-1.42556	2.36254	RASSF2
intracellular protein transport (GO:0006886)	6/348	0.100861	0.267785	0.204668	0.397546	-1.02813	2.35853	NUP155;CSE1L;NUP50;RPL11;ARHGEF2;RAN
double-strand break repair via homologous recombination (GO:0000724)	2/77	0.156705	0.306191	0.220645	0.407512	-1.27022	2.35421	SFPQ;RPA1
fat cell differentiation (GO:0045444)	2/56	0.0930802	0.263227	0.136924	0.360832	-0.989776	2.35002	EP300;SIRT1
TOR signaling (GO:0031929)	1/24	0.198074	0.33479	0.244963	0.418347	-1.45072	2.34888	RPS6
regulation of mRNA stability (GO:0043488)	3/129	0.114895	0.27621	0.183329	0.380849	-1.08248	2.34221	SERBP1;CIRBP;PSMD1
histone mRNA metabolic process (GO:0008334)	1/25	0.20542	0.339717	0.25341	0.423328	-1.4613	2.31279	CPSF2
chaperone mediated protein folding requiring cofactor (GO:0051085)	1/25	0.20542	0.339717	0.25341	0.423328	-1.46102	2.31235	BAG1
negative regulation of cyclin-dependent protein serine/threonine kinase activity (GO:0045736)	1/25	0.20542	0.339717	0.25341	0.423328	-1.45871	2.3087	PLK1
ERK1 and ERK2 cascade (GO:0070371)	1/22	0.183177	0.322893	0.227785	0.409763	-1.35453	2.29905	MAPK1
nucleotide catabolic process (GO:0009166)	1/18	0.152555	0.299864	0.192254	0.385975	-1.21052	2.27605	DERA
recombinational repair (GO:0000725)	2/72	0.140862	0.294142	0.200194	0.393301	-1.1606	2.27475	SFPQ;RPA1
positive regulation of neutrophil migration (GO:1902624)	1/26	0.212699	0.342769	0.261762	0.428664	-1.46857	2.27316	CAMK1D
production of small RNA involved in gene silencing by RNA (GO:0070918)	1/20	0.168006	0.312487	0.210218	0.398195	-1.27244	2.26972	TSN
platelet degranulation (GO:0002576)	3/125	0.107159	0.272345	0.172238	0.374848	-1.01536	2.26774	ANXA5;TAGLN2;SOD1
regulation of DNA damage response, signal transduction by p53 class mediator (GO:0043516)	1/26	0.212699	0.342769	0.261762	0.428664	-1.46244	2.26367	SIRT1
nucleotide-excision repair, DNA incision, 3'-to lesion (GO:0006295)	1/23	0.19066	0.330762	0.236422	0.416192	-1.36082	2.25524	RPA1
regulation of epithelial cell proliferation (GO:0050678)	2/73	0.144002	0.294142	0.204267	0.397354	-1.16317	2.25414	C5AR1;SRSF6
negative regulation of mRNA processing (GO:0050686)	1/16	0.136818	0.288788	0.173884	0.374848	-1.12791	2.24352	SRSF6
negative regulation of oxidative stress-induced cell death (GO:1903202)	1/25	0.20542	0.339717	0.25341	0.423328	-1.40906	2.23012	SIRT1
melanosome organization (GO:0032438)	1/24	0.198074	0.33479	0.244963	0.418347	-1.37268	2.22253	AP1M1
negative regulation of intrinsic apoptotic signaling pathway (GO:2001243)	2/63	0.113352	0.272999	0.164078	0.371778	-1.01486	2.20961	ARHGEF2;SIRT1
negative regulation of cell cycle arrest (GO:0071157)	1/22	0.183177	0.322893	0.227785	0.409763	-1.29015	2.18977	EVI2B
cellular response to ammonium ion (GO:0071242)	1/24	0.198074	0.33479	0.244963	0.418347	-1.35092	2.1873	MAPK1
cellular response to catecholamine stimulus (GO:0071870)	1/24	0.198074	0.33479	0.244963	0.418347	-1.34424	2.17648	MAPK1
regulation of telomere capping (GO:1904353)	1/24	0.198074	0.33479	0.244963	0.418347	-1.34058	2.17055	MAPK1
regulation of phosphorylation (GO:0042325)	3/120	0.0977929	0.267785	0.158664	0.371778	-0.933152	2.16949	NUP155;NUP50;SIRT1
positive regulation of neutrophil chemotaxis (GO:0090023)	1/25	0.20542	0.339717	0.25341	0.423328	-1.36974	2.16788	CAMK1D
negative regulation of viral transcription (GO:0032897)	1/24	0.198074	0.33479	0.244963	0.418347	-1.32756	2.14948	TARDBP
activation of phospholipase C activity (GO:0007202)	1/23	0.19066	0.330762	0.236422	0.416192	-1.2966	2.14882	C5AR1
cyclic nucleotide metabolic process (GO:0009187)	1/26	0.212699	0.342769	0.261762	0.428664	-1.37945	2.13522	NUDT4
regulation of glucose metabolic process (GO:0010906)	1/26	0.212699	0.342769	0.261762	0.428664	-1.36493	2.11275	SIRT1
histone ubiquitination (GO:0016574)	1/22	0.183177	0.322893	0.227785	0.409763	-1.24433	2.112	CTR9
internal peptidyl-lysine acetylation (GO:0018393)	1/27	0.219913	0.352665	0.270022	0.439823	-1.38217	2.09334	EP300
negative regulation of neuron apoptotic process (GO:0043524)	2/64	0.116335	0.276242	0.168033	0.374848	-0.967747	2.0819	MSH2;SOD1
regulation of actin filament bundle assembly (GO:0032231)	1/25	0.20542	0.339717	0.25341	0.423328	-1.30957	2.07266	FHOD1
cellular senescence (GO:0090398)	1/25	0.20542	0.339717	0.25341	0.423328	-1.30833	2.07069	SIRT1
positive regulation of multicellular organismal process (GO:0051240)	4/203	0.116254	0.276242	0.201205	0.393301	-0.956492	2.05835	NUMA1;SRSF6;SIRT1;SOD1
histone monoubiquitination (GO:0010390)	1/25	0.20542	0.339717	0.25341	0.423328	-1.29896	2.05586	CTR9
cellular protein catabolic process (GO:0044257)	2/63	0.113352	0.272999	0.164078	0.371778	-0.942938	2.05302	UBE2G1;CLPX
positive regulation of granulocyte chemotaxis (GO:0071624)	1/27	0.219913	0.352665	0.270022	0.439823	-1.35458	2.05155	CAMK1D
positive regulation of endothelial cell proliferation (GO:0001938)	2/68	0.128458	0.282847	0.184009	0.381058	-0.999281	2.05067	HMGB2;SIRT1
positive regulation of protein polymerization (GO:0032273)	2/65	0.119337	0.276242	0.172005	0.374848	-0.963111	2.04738	NUMA1;MAPRE1
regulated exocytosis (GO:0045055)	3/149	0.15644	0.306129	0.241212	0.418347	-1.10223	2.04473	ANXA5;TAGLN2;SOD1
regulation of catecholamine secretion (GO:0050433)	1/23	0.19066	0.330762	0.236422	0.416192	-1.23038	2.03907	GRK2
regulation of protein oligomerization (GO:0032459)	1/24	0.198074	0.33479	0.244963	0.418347	-1.24579	2.01708	EP300
response to alcohol (GO:0097305)	1/26	0.212699	0.342769	0.261762	0.428664	-1.29777	2.00878	SOD1
negative regulation of cell cycle G2/M phase transition (GO:1902750)	2/70	0.134627	0.288788	0.192079	0.385975	-1.00105	2.00736	PLK1;PSMD1
regulation of protein ubiquitination involved in ubiquitin-dependent protein catabolic process (GO:2000058)	1/26	0.212699	0.342769	0.261762	0.428664	-1.29579	2.00572	RPL11
negative regulation of transcription from RNA polymerase II promoter (GO:0000122)	9/566	0.0765409	0.247465	0.194345	0.389579	-0.779414	2.00304	HDAC2;SFPQ;CTR9;PLK1;EP300;HDGF;LRRFIP1;SIRT1;CGGBP1
regulation of myeloid cell differentiation (GO:0045637)	2/66	0.122359	0.279004	0.175992	0.378771	-0.952634	2.00129	CTR9;EP300
negative regulation of cytoskeleton organization (GO:0051494)	1/25	0.20542	0.339717	0.25341	0.423328	-1.26142	1.99644	CORO1A
mitotic G2/M transition checkpoint (GO:0044818)	1/24	0.198074	0.33479	0.244963	0.418347	-1.22858	1.98921	TOPBP1
negative regulation of protein serine/threonine kinase activity (GO:0071901)	2/68	0.128458	0.282847	0.184009	0.381058	-0.968778	1.98808	PLK1;SIRT1
neutral amino acid transport (GO:0015804)	1/26	0.212699	0.342769	0.261762	0.428664	-1.28303	1.98596	SLC43A2
protein localization to chromatin (GO:0071168)	1/17	0.144722	0.294142	0.18312	0.380849	-1.02242	1.97628	PLK1
regulation of developmental growth (GO:0048638)	1/31	0.248114	0.378503	0.302151	0.467446	-1.40961	1.96481	SOD1
positive regulation of DNA-templated transcription, elongation (GO:0032786)	1/25	0.20542	0.339717	0.25341	0.423328	-1.24108	1.96426	CTR9
positive regulation of nuclear division (GO:0051785)	1/26	0.212699	0.342769	0.261762	0.428664	-1.26794	1.96261	NUSAP1
positive regulation of mRNA catabolic process (GO:0061014)	1/24	0.198074	0.33479	0.244963	0.418347	-1.20487	1.95082	GTPBP1
regulation of transcription elongation from RNA polymerase II promoter (GO:0034243)	1/24	0.198074	0.33479	0.244963	0.418347	-1.20316	1.94805	CTR9
vascular endothelial growth factor receptor signaling pathway (GO:0048010)	2/71	0.137737	0.290262	0.196131	0.392561	-0.982303	1.94733	ELMO1;WASF2
regulation of lipid biosynthetic process (GO:0046890)	1/29	0.234142	0.367419	0.286266	0.455738	-1.33642	1.94025	CREB1
cellular response to decreased oxygen levels (GO:0036294)	2/65	0.119337	0.276242	0.172005	0.374848	-0.911724	1.93814	HP1BP3;SIRT1
superoxide metabolic process (GO:0006801)	1/30	0.24116	0.372213	0.294253	0.460646	-1.36105	1.93581	SOD1
positive regulation by host of viral transcription (GO:0043923)	1/18	0.152555	0.299864	0.192254	0.385975	-1.02708	1.93114	EP300
positive regulation of B cell proliferation (GO:0030890)	1/31	0.248114	0.378503	0.302151	0.467446	-1.38443	1.92971	NFATC2
nucleotide biosynthetic process (GO:0009165)	1/27	0.219913	0.352665	0.270022	0.439823	-1.27192	1.92636	RRM1
negative regulation of cell-matrix adhesion (GO:0001953)	1/28	0.22706	0.361045	0.278189	0.448858	-1.29885	1.9256	RCC2
negative regulation of peptidyl-tyrosine phosphorylation (GO:0050732)	1/28	0.22706	0.361045	0.278189	0.448858	-1.29805	1.92441	SH3BP5
regulation of protein import into nucleus (GO:0042306)	1/26	0.212699	0.342769	0.261762	0.428664	-1.2423	1.92293	SIRT1
negative regulation of oxidative stress-induced intrinsic apoptotic signaling pathway (GO:1902176)	1/19	0.160316	0.306863	0.201286	0.393301	-1.04475	1.91253	SIRT1
regulation of leukocyte chemotaxis (GO:0002688)	1/31	0.248114	0.378503	0.302151	0.467446	-1.36279	1.89955	CAMK1D
nucleic acid phosphodiester bond hydrolysis (GO:0090305)	2/74	0.147157	0.298629	0.20835	0.398195	-0.983579	1.88479	PCNA;RPA1
cellular response to hydrogen peroxide (GO:0070301)	1/29	0.234142	0.367419	0.286266	0.455738	-1.29268	1.87675	SIRT1
regulation of cellular senescence (GO:2000772)	1/25	0.20542	0.339717	0.25341	0.423328	-1.18516	1.87575	SIRT1
regulation of chromosome organization (GO:0033044)	1/25	0.20542	0.339717	0.25341	0.423328	-1.18429	1.87437	MKI67
regulation of cellular protein localization (GO:1903827)	1/26	0.212699	0.342769	0.261762	0.428664	-1.20512	1.86538	KCNAB2
regulation of embryonic development (GO:0045995)	1/30	0.24116	0.372213	0.294253	0.460646	-1.29379	1.84015	CDK1
regulation of neutrophil chemotaxis (GO:0090022)	1/30	0.24116	0.372213	0.294253	0.460646	-1.29343	1.83963	CAMK1D
triglyceride homeostasis (GO:0070328)	1/29	0.234142	0.367419	0.286266	0.455738	-1.26611	1.83818	SIRT1
positive regulation of lipid metabolic process (GO:0045834)	1/22	0.183177	0.322893	0.227785	0.409763	-1.07782	1.82938	CREB1
sensory perception of mechanical stimulus (GO:0050954)	2/79	0.163134	0.311352	0.228876	0.410604	-1.00511	1.82245	CCDC50;SOD1
protein import into nucleus, translocation (GO:0000060)	1/26	0.212699	0.342769	0.261762	0.428664	-1.17693	1.82174	RAN
lysosome localization (GO:0032418)	1/30	0.24116	0.372213	0.294253	0.460646	-1.27678	1.81596	MILR1
regulation of microtubule cytoskeleton organization (GO:0070507)	1/24	0.198074	0.33479	0.244963	0.418347	-1.12117	1.81531	STMN1
regulation of double-strand break repair via homologous recombination (GO:0010569)	1/28	0.22706	0.361045	0.278189	0.448858	-1.2125	1.79758	HELB
negative regulation of cell cycle (GO:0045786)	2/73	0.144002	0.294142	0.204267	0.397354	-0.919075	1.7811	PLK1;MAD2L1
tube closure (GO:0060606)	1/30	0.24116	0.372213	0.294253	0.460646	-1.24758	1.77442	MTHFD1L
negative regulation of response to DNA damage stimulus (GO:2001021)	1/29	0.234142	0.367419	0.286266	0.455738	-1.22063	1.77214	SIRT1
negative regulation of intrinsic apoptotic signaling pathway in response to DNA damage (GO:1902230)	1/25	0.20542	0.339717	0.25341	0.423328	-1.1172	1.76819	SIRT1
purine ribonucleoside monophosphate biosynthetic process (GO:0009168)	1/40	0.307914	0.426218	0.369396	0.516761	-1.49747	1.76392	PAICS
mitochondrial calcium ion transmembrane transport (GO:0006851)	1/22	0.183177	0.322893	0.227785	0.409763	-1.03889	1.7633	PARL
cyclic-nucleotide-mediated signaling (GO:0019935)	1/33	0.261832	0.388173	0.317685	0.475804	-1.30212	1.74491	NUDT4
actin nucleation (GO:0045010)	1/25	0.20542	0.339717	0.25341	0.423328	-1.10235	1.74469	ACTR2
cortical cytoskeleton organization (GO:0030865)	1/30	0.24116	0.372213	0.294253	0.460646	-1.21025	1.72133	FMNL1
regulation of alcohol biosynthetic process (GO:1902930)	1/35	0.275301	0.399582	0.332875	0.488539	-1.33165	1.71768	RAN
cilium assembly (GO:0060271)	5/289	0.126576	0.282847	0.23226	0.416106	-0.829902	1.71534	ACTR2;PLK1;CDK1;MAPRE1;TUBB4B
glucose homeostasis (GO:0042593)	2/75	0.150326	0.299864	0.212441	0.400803	-0.898197	1.70204	RPS6;SIRT1
negative regulation of phosphorylation (GO:0042326)	2/76	0.153509	0.30129	0.216539	0.405136	-0.908001	1.70159	TARDBP;SIRT1
response to exogenous dsRNA (GO:0043330)	1/34	0.268597	0.393763	0.325322	0.482299	-1.28882	1.69421	PQBP1
regulation of defense response to virus by host (GO:0050691)	1/31	0.248114	0.378503	0.302151	0.467446	-1.21132	1.68842	PQBP1
regulation of transcription from RNA polymerase II promoter in response to hypoxia (GO:0061418)	2/79	0.163134	0.311352	0.228876	0.410604	-0.929945	1.68616	EP300;PSMD1
response to alkaloid (GO:0043279)	1/24	0.198074	0.33479	0.244963	0.418347	-1.03609	1.67756	MAPK1
anterograde axonal transport (GO:0008089)	1/32	0.255004	0.384113	0.309962	0.472853	-1.22353	1.67192	SOD1
regulation of endothelial cell proliferation (GO:0001936)	2/80	0.166366	0.312487	0.233	0.416192	-0.932122	1.67182	HMGB2;SIRT1
regulation of protein localization to cell surface (GO:2000008)	1/28	0.22706	0.361045	0.278189	0.448858	-1.12685	1.67061	KCNAB2
lysosome organization (GO:0007040)	1/32	0.255004	0.384113	0.309962	0.472853	-1.21905	1.6658	CORO1A
regulation of gene expression, epigenetic (GO:0040029)	2/75	0.150326	0.299864	0.212441	0.400803	-0.878155	1.66406	EP300;DEK
neural tube closure (GO:0001843)	1/34	0.268597	0.393763	0.325322	0.482299	-1.26442	1.66214	MTHFD1L
endodermal cell differentiation (GO:0035987)	1/33	0.261832	0.388173	0.317685	0.475804	-1.22799	1.64558	CTR9
positive regulation of myeloid cell differentiation (GO:0045639)	1/30	0.24116	0.372213	0.294253	0.460646	-1.15679	1.6453	HMGB2
regulation of cation transmembrane transport (GO:1904062)	1/31	0.248114	0.378503	0.302151	0.467446	-1.1752	1.63807	KCNAB2
positive regulation of telomere maintenance via telomerase (GO:0032212)	1/33	0.261832	0.388173	0.317685	0.475804	-1.22154	1.63693	MAPK1
histone H3-K4 methylation (GO:0051568)	1/24	0.198074	0.33479	0.244963	0.418347	-1.00914	1.63392	CTR9
positive regulation of phospholipase C activity (GO:0010863)	1/31	0.248114	0.378503	0.302151	0.467446	-1.17191	1.63349	C5AR1
positive regulation of Notch signaling pathway (GO:0045747)	1/34	0.268597	0.393763	0.325322	0.482299	-1.23694	1.62601	EP300
regulation of protein autophosphorylation (GO:0031952)	1/32	0.255004	0.384113	0.309962	0.472853	-1.18729	1.62241	RASSF2
'de novo' posttranslational protein folding (GO:0051084)	1/31	0.248114	0.378503	0.302151	0.467446	-1.16211	1.61983	BAG1
regulation of mitochondrial membrane potential (GO:0051881)	1/36	0.281944	0.402996	0.340344	0.492356	-1.27285	1.61149	SOD1
negative regulation of neuron death (GO:1901215)	2/84	0.179403	0.322893	0.249534	0.423328	-0.936985	1.60985	MSH2;SOD1
protein catabolic process (GO:0030163)	2/82	0.172864	0.31899	0.24126	0.418347	-0.916118	1.60802	UBE2G1;CLPX
positive regulation of tumor necrosis factor superfamily cytokine production (GO:1903557)	1/33	0.261832	0.388173	0.317685	0.475804	-1.19762	1.60488	ARHGEF2
negative regulation of fat cell differentiation (GO:0045599)	1/33	0.261832	0.388173	0.317685	0.475804	-1.19598	1.60267	SIRT1
sensory perception of sound (GO:0007605)	2/82	0.172864	0.31899	0.24126	0.418347	-0.912328	1.60136	CCDC50;SOD1
negative regulation of intracellular steroid hormone receptor signaling pathway (GO:0033144)	1/29	0.234142	0.367419	0.286266	0.455738	-1.09894	1.59547	SIRT1
cellular response to cadmium ion (GO:0071276)	1/30	0.24116	0.372213	0.294253	0.460646	-1.11864	1.59104	MAPK1
positive regulation of signal transduction (GO:0009967)	4/207	0.122422	0.279004	0.210453	0.398195	-0.754871	1.58544	CSNK2A1;LANCL2;EP300;SIRT1
protein K11-linked ubiquitination (GO:0070979)	1/29	0.234142	0.367419	0.286266	0.455738	-1.09135	1.58445	UBE2C
positive regulation of protein complex assembly (GO:0031334)	2/89	0.195905	0.33479	0.270249	0.439823	-0.968645	1.57901	BCLAF1;RPA1
positive regulation of catalytic activity (GO:0043085)	1/34	0.268597	0.393763	0.325322	0.482299	-1.1955	1.57153	SOD1
retrograde vesicle-mediated transport, Golgi to ER (GO:0006890)	2/81	0.16961	0.31458	0.237128	0.41632	-0.882639	1.56603	KIF2C;KIF15
regulation of striated muscle contraction (GO:0006942)	1/30	0.24116	0.372213	0.294253	0.460646	-1.09882	1.56285	GRK2
carboxylic acid metabolic process (GO:0019752)	1/34	0.268597	0.393763	0.325322	0.482299	-1.18724	1.56067	MTHFD1L
regulation of wound healing (GO:0061041)	1/35	0.275301	0.399582	0.332875	0.488539	-1.20976	1.56045	SRSF6
response to cadmium ion (GO:0046686)	1/32	0.255004	0.384113	0.309962	0.472853	-1.14005	1.55785	MAPK1
replication fork processing (GO:0031297)	1/31	0.248114	0.378503	0.302151	0.467446	-1.11729	1.55736	PCNA
carbohydrate derivative biosynthetic process (GO:1901137)	1/30	0.24116	0.372213	0.294253	0.460646	-1.09113	1.5519	RRM1
maturation of SSU-rRNA from tricistronic rRNA transcript (SSU-rRNA, 5.8S rRNA, LSU-rRNA) (GO:0000462)	1/36	0.281944	0.402996	0.340344	0.492356	-1.22577	1.55189	NOC4L
negative regulation of extrinsic apoptotic signaling pathway via death domain receptors (GO:1902042)	1/32	0.255004	0.384113	0.309962	0.472853	-1.13316	1.54843	ARHGEF2
regulation of fat cell differentiation (GO:0045598)	2/73	0.144002	0.294142	0.204267	0.397354	-0.796223	1.54302	CREB1;SIRT1
primary neural tube formation (GO:0014020)	1/29	0.234142	0.367419	0.286266	0.455738	-1.06184	1.5416	MTHFD1L
negative regulation of proteasomal ubiquitin-dependent protein catabolic process (GO:0032435)	1/25	0.20542	0.339717	0.25341	0.423328	-0.969439	1.53433	RPL11
regulation of DNA recombination (GO:0000018)	1/34	0.268597	0.393763	0.325322	0.482299	-1.15258	1.51511	MSH2
regulation of protein kinase activity (GO:0045859)	3/148	0.154261	0.302314	0.238241	0.417717	-0.805017	1.50467	RASSF2;SIRT1;SOD1
regulation of protein targeting to mitochondrion (GO:1903214)	2/89	0.195905	0.33479	0.270249	0.439823	-0.921665	1.50243	SAE1;PARL
platelet aggregation (GO:0070527)	1/34	0.268597	0.393763	0.325322	0.482299	-1.14245	1.5018	CLIC1
negative regulation of protein complex assembly (GO:0031333)	1/36	0.281944	0.402996	0.340344	0.492356	-1.18369	1.4986	EP300
histone exchange (GO:0043486)	1/37	0.288526	0.40929	0.347729	0.497566	-1.20381	1.4963	ANP32E
alpha-amino acid metabolic process (GO:1901605)	1/32	0.255004	0.384113	0.309962	0.472853	-1.09449	1.4956	CKB
cofactor biosynthetic process (GO:0051188)	1/32	0.255004	0.384113	0.309962	0.472853	-1.09245	1.4928	NFU1
regulation of cellular biosynthetic process (GO:0031326)	1/30	0.24116	0.372213	0.294253	0.460646	-1.04433	1.48534	SIRT1
regulation of phosphatidylinositol 3-kinase signaling (GO:0014066)	2/81	0.16961	0.31458	0.237128	0.41632	-0.833463	1.47878	MAPK1;SIRT1
positive regulation of telomere maintenance via telomere lengthening (GO:1904358)	1/35	0.275301	0.399582	0.332875	0.488539	-1.13933	1.46961	MAPK1
negative regulation of proteasomal protein catabolic process (GO:1901799)	1/29	0.234142	0.367419	0.286266	0.455738	-1.00779	1.46313	RPL11
positive regulation of transcription factor import into nucleus (GO:0042993)	1/33	0.261832	0.388173	0.317685	0.475804	-1.09143	1.46258	TRIM28
beta-catenin-TCF complex assembly (GO:1904837)	1/31	0.248114	0.378503	0.302151	0.467446	-1.04778	1.46046	EP300
regulation of nervous system development (GO:0051960)	1/26	0.212699	0.342769	0.261762	0.428664	-0.943016	1.45967	HMGB2
regulation of protein tyrosine kinase activity (GO:0061097)	1/32	0.255004	0.384113	0.309962	0.472853	-1.05778	1.44543	SH3BP5
negative regulation of cell morphogenesis involved in differentiation (GO:0010771)	1/31	0.248114	0.378503	0.302151	0.467446	-1.03413	1.44144	RCC2
regulation of potassium ion transmembrane transport (GO:1901379)	1/33	0.261832	0.388173	0.317685	0.475804	-1.06089	1.42165	KCNAB2
regulation of intracellular steroid hormone receptor signaling pathway (GO:0033143)	1/28	0.22706	0.361045	0.278189	0.448858	-0.955503	1.41657	EP300
positive regulation of DNA binding (GO:0043388)	1/35	0.275301	0.399582	0.332875	0.488539	-1.09693	1.41492	HMGB2
ncRNA metabolic process (GO:0034660)	1/35	0.275301	0.399582	0.332875	0.488539	-1.09266	1.40942	RAN
regulation of ubiquitin-protein transferase activity (GO:0051438)	1/32	0.255004	0.384113	0.309962	0.472853	-1.02656	1.40277	PLK1
phosphatidylcholine biosynthetic process (GO:0006656)	1/33	0.261832	0.388173	0.317685	0.475804	-1.04663	1.40254	CSNK2A1
negative regulation of locomotion (GO:0040013)	1/26	0.212699	0.342769	0.261762	0.428664	-0.90427	1.3997	TRIM28
regulation of insulin receptor signaling pathway (GO:0046626)	1/35	0.275301	0.399582	0.332875	0.488539	-1.08395	1.39817	SIRT1
homotypic cell-cell adhesion (GO:0034109)	1/39	0.301511	0.422243	0.362254	0.512219	-1.16282	1.39416	CLIC1
phagosome maturation (GO:0090382)	1/33	0.261832	0.388173	0.317685	0.475804	-1.03656	1.38904	CORO1A
respiratory system development (GO:0060541)	1/30	0.24116	0.372213	0.294253	0.460646	-0.97475	1.38638	SMCHD1
positive regulation of lipid biosynthetic process (GO:0046889)	1/29	0.234142	0.367419	0.286266	0.455738	-0.944976	1.37194	CREB1
actin-myosin filament sliding (GO:0033275)	1/39	0.301511	0.422243	0.362254	0.512219	-1.14266	1.37	TPM3
global genome nucleotide-excision repair (GO:0070911)	1/33	0.261832	0.388173	0.317685	0.475804	-1.00881	1.35186	RAD23B
positive regulation of supramolecular fiber organization (GO:1902905)	2/85	0.182686	0.322893	0.253675	0.423328	-0.793122	1.3483	NUMA1;MAPRE1
muscle filament sliding (GO:0030049)	1/39	0.301511	0.422243	0.362254	0.512219	-1.1185	1.34103	TPM3
axonal transport (GO:0098930)	1/37	0.288526	0.40929	0.347729	0.497566	-1.06709	1.32636	SOD1
entry into host cell (GO:0030260)	1/34	0.268597	0.393763	0.325322	0.482299	-1.00629	1.32281	GRK2
regulation of transcription from RNA polymerase II promoter (GO:0006357)	18/1479	0.131605	0.288434	0.40699	0.540053	-0.65066	1.31951	HDAC2;FHOD1;CTR9;PLK1;HMGB2;NFATC2;DEK;HTATSF1;SIRT1;SFPQ;CREB1;PRPF6;EP300;HDGF;STAT6;ARHGEF2;LRRFIP1;CGGBP1
retina homeostasis (GO:0001895)	1/39	0.301511	0.422243	0.362254	0.512219	-1.07796	1.29242	SOD1
regulation of substrate adhesion-dependent cell spreading (GO:1900024)	1/42	0.320547	0.433216	0.383441	0.523598	-1.13585	1.29228	RCC2
regulation of protein catabolic process (GO:0042176)	2/92	0.205897	0.339717	0.282676	0.454981	-0.815165	1.28827	CSNK2A1;MAD2L1
positive regulation of DNA replication (GO:0045740)	1/36	0.281944	0.402996	0.340344	0.492356	-1.01542	1.28557	PCNA
gene silencing by miRNA (GO:0035195)	1/32	0.255004	0.384113	0.309962	0.472853	-0.934999	1.27765	RAN
neuron migration (GO:0001764)	1/41	0.314259	0.43047	0.376458	0.520002	-1.1029	1.27664	NAV1
regulation of transcription from RNA polymerase II promoter in response to stress (GO:0043618)	2/94	0.212588	0.342769	0.290952	0.460646	-0.820587	1.2706	EP300;PSMD1
sensory organ development (GO:0007423)	1/41	0.314259	0.43047	0.376458	0.520002	-1.08994	1.26164	SMCHD1
activation of protein kinase activity (GO:0032147)	4/234	0.167442	0.312487	0.275565	0.447368	-0.704484	1.259	C5AR1;CDK1;MAPK1;SOD1
negative regulation of protein kinase B signaling (GO:0051898)	1/36	0.281944	0.402996	0.340344	0.492356	-0.990945	1.25458	SIRT1
regulation of neuron apoptotic process (GO:0043523)	2/90	0.199229	0.336311	0.274392	0.446015	-0.777472	1.2543	MSH2;SOD1
embryonic limb morphogenesis (GO:0030326)	1/35	0.275301	0.399582	0.332875	0.488539	-0.946837	1.22132	HDAC2
regulation of B cell proliferation (GO:0030888)	1/44	0.33295	0.443147	0.397176	0.533489	-1.08998	1.19872	NFATC2
protein K63-linked ubiquitination (GO:0070534)	1/38	0.295048	0.416296	0.355032	0.504176	-0.980057	1.19627	UBE2G1
cellular response to radiation (GO:0071478)	1/43	0.326777	0.440278	0.390347	0.531373	-1.06831	1.19488	SIRT1
positive regulation of myeloid leukocyte differentiation (GO:0002763)	1/33	0.261832	0.388173	0.317685	0.475804	-0.890002	1.19265	EVI2B
positive regulation of phagocytosis (GO:0050766)	1/40	0.307914	0.426218	0.369396	0.516761	-1.01189	1.19194	CAMK1D
response to glucagon (GO:0033762)	1/35	0.275301	0.399582	0.332875	0.488539	-0.920841	1.18778	CREB1
regulation of dendrite development (GO:0050773)	1/38	0.295048	0.416296	0.355032	0.504176	-0.970807	1.18498	CAMK1D
[truncated: 410 more rows]

## Sheet: M0 down
Term	Overlap	P-value	Adjusted P-value	Old P-value	Old Adjusted P-value	Z-score	Combined Score	Genes
[truncated: 488 more rows]

## Sheet: M1 up
Term	Overlap	P-value	Adjusted P-value	Old P-value	Old Adjusted P-value	Z-score	Combined Score	Genes
[truncated: 1,786 more rows]

[truncated: 7 more sheets: M1 down, M2 up, M2 down, Off3d up, Off3d down, Off5d up, Off5d down]
