# Supplementary material for: Multiomic characterization of pancreatic cancer-associated macrophage polarization reveals deregulated metabolic programs driven by the GM-CSF–PI3K pathway
Source: eLife. 2022 Feb 14;11:e73796. doi: 10.7554/eLife.73796 (PMC8843093; doi:10.7554/eLife.73796)
Supplement: Supplementary file 4. [file elife-73796-supp4.xlsx]

## Sheet: Ranked Gene List KrasON vs Off
NAME	TITLE	SCORE
ARG1	arginase 1 [Source:HGNC Symbol;Acc:HGNC:663]	4.76289
AQP9	aquaporin 9 [Source:HGNC Symbol;Acc:HGNC:643]	4.55446
SIRPD	signal regulatory protein delta [Source:HGNC Symbol;Acc:HGNC:16248]	4.52495
COX6A2	cytochrome c oxidase subunit 6A2 [Source:HGNC Symbol;Acc:HGNC:2279]	4.51607
CXCL1	C-X-C motif chemokine ligand 1 [Source:HGNC Symbol;Acc:HGNC:4602]	4.4122
VCAN	versican [Source:HGNC Symbol;Acc:HGNC:2464]	4.36318
SERPINB10	serpin family B member 10 [Source:HGNC Symbol;Acc:HGNC:8942]	4.32477
ENAH	ENAH actin regulator [Source:HGNC Symbol;Acc:HGNC:18271]	4.28414
HLA-DOB	major histocompatibility complex, class II, DO beta [Source:HGNC Symbol;Acc:HGNC:4937]	4.238
NRG1	neuregulin 1 [Source:HGNC Symbol;Acc:HGNC:7997]	4.18145
BST1	bone marrow stromal cell antigen 1 [Source:HGNC Symbol;Acc:HGNC:1118]	4.16703
RASGRP1	RAS guanyl releasing protein 1 [Source:HGNC Symbol;Acc:HGNC:9878]	4.12254
VDR	vitamin D receptor [Source:HGNC Symbol;Acc:HGNC:12679]	4.11732
JAML	junction adhesion molecule like [Source:HGNC Symbol;Acc:HGNC:19084]	4.0693
TNFSF14	TNF superfamily member 14 [Source:HGNC Symbol;Acc:HGNC:11930]	4.02298
TPPP3	tubulin polymerization promoting protein family member 3 [Source:HGNC Symbol;Acc:HGNC:24162]	3.99929
SELP	selectin P [Source:HGNC Symbol;Acc:HGNC:10721]	3.96054
CD38	CD38 molecule [Source:HGNC Symbol;Acc:HGNC:1667]	3.95597
MS4A8	membrane spanning 4-domains A8 [Source:HGNC Symbol;Acc:HGNC:13380]	3.94183
AK4	adenylate kinase 4 [Source:HGNC Symbol;Acc:HGNC:363]	3.93644
HS3ST3B1	heparan sulfate-glucosamine 3-sulfotransferase 3B1 [Source:HGNC Symbol;Acc:HGNC:5198]	3.93251
C1RL	complement C1r subcomponent like [Source:HGNC Symbol;Acc:HGNC:21265]	3.91801
LY6H	lymphocyte antigen 6 family member H [Source:HGNC Symbol;Acc:HGNC:6728]	3.88405
GPR15	G protein-coupled receptor 15 [Source:HGNC Symbol;Acc:HGNC:4469]	3.85326
RCOR2	REST corepressor 2 [Source:HGNC Symbol;Acc:HGNC:27455]	3.82739
MGARP	mitochondria localized glutamic acid rich protein [Source:HGNC Symbol;Acc:HGNC:29969]	3.82419
PGF	placental growth factor [Source:HGNC Symbol;Acc:HGNC:8893]	3.78736
TTC25	tetratricopeptide repeat domain 25 [Source:HGNC Symbol;Acc:HGNC:25280]	3.73136
CHAC1	ChaC glutathione specific gamma-glutamylcyclotransferase 1 [Source:HGNC Symbol;Acc:HGNC:28680]	3.7076
SCN2B	sodium voltage-gated channel beta subunit 2 [Source:HGNC Symbol;Acc:HGNC:10589]	3.68246
RHOU	ras homolog family member U [Source:HGNC Symbol;Acc:HGNC:17794]	3.65359
ABTB2	ankyrin repeat and BTB domain containing 2 [Source:HGNC Symbol;Acc:HGNC:23842]	3.63319
IFITM1	interferon induced transmembrane protein 1 [Source:HGNC Symbol;Acc:HGNC:5412]	3.62913
CD207	CD207 molecule [Source:HGNC Symbol;Acc:HGNC:17935]	3.60824
SIRPB1	signal regulatory protein beta 1 [Source:HGNC Symbol;Acc:HGNC:15928]	3.57639
SLC7A5	solute carrier family 7 member 5 [Source:HGNC Symbol;Acc:HGNC:11063]	3.54865
CLEC4F	C-type lectin domain family 4 member F [Source:HGNC Symbol;Acc:HGNC:25357]	3.54837
CISH	cytokine inducible SH2 containing protein [Source:HGNC Symbol;Acc:HGNC:1984]	3.51616
SNAI3	snail family transcriptional repressor 3 [Source:HGNC Symbol;Acc:HGNC:18411]	3.48776
MLXIPL	MLX interacting protein like [Source:HGNC Symbol;Acc:HGNC:12744]	3.48482
EGLN3	egl-9 family hypoxia inducible factor 3 [Source:HGNC Symbol;Acc:HGNC:14661]	3.47465
C1R	complement C1r [Source:HGNC Symbol;Acc:HGNC:1246]	3.46236
ADORA2B	adenosine A2b receptor [Source:HGNC Symbol;Acc:HGNC:264]	3.44468
CCR5	C-C motif chemokine receptor 5 [Source:HGNC Symbol;Acc:HGNC:1606]	3.3782
TMEM215	transmembrane protein 215 [Source:HGNC Symbol;Acc:HGNC:33816]	3.3748
F5	coagulation factor V [Source:HGNC Symbol;Acc:HGNC:3542]	3.34875
SPINT1	serine peptidase inhibitor, Kunitz type 1 [Source:HGNC Symbol;Acc:HGNC:11246]	3.34752
RNASE2	ribonuclease A family member 2 [Source:HGNC Symbol;Acc:HGNC:10045]	3.34414
MMP28	matrix metallopeptidase 28 [Source:HGNC Symbol;Acc:HGNC:14366]	3.32926
SIRPB2	signal regulatory protein beta 2 [Source:HGNC Symbol;Acc:HGNC:16247]	3.3138
ISLR2	immunoglobulin superfamily containing leucine rich repeat 2 [Source:HGNC Symbol;Acc:HGNC:29286]	3.27784
ITGA1	integrin subunit alpha 1 [Source:HGNC Symbol;Acc:HGNC:6134]	3.26758
SYNGAP1	synaptic Ras GTPase activating protein 1 [Source:HGNC Symbol;Acc:HGNC:11497]	3.26697
CCL17	C-C motif chemokine ligand 17 [Source:HGNC Symbol;Acc:HGNC:10615]	3.25589
SLC16A3	solute carrier family 16 member 3 [Source:HGNC Symbol;Acc:HGNC:10924]	3.24773
SCARF2	scavenger receptor class F member 2 [Source:HGNC Symbol;Acc:HGNC:19869]	3.20281
TRIB3	tribbles pseudokinase 3 [Source:HGNC Symbol;Acc:HGNC:16228]	3.20008
NAAA	N-acylethanolamine acid amidase [Source:HGNC Symbol;Acc:HGNC:736]	3.18466
IFI27L2	interferon alpha inducible protein 27 like 2 [Source:HGNC Symbol;Acc:HGNC:19753]	3.17593
SELL	selectin L [Source:HGNC Symbol;Acc:HGNC:10720]	3.16982
SLC36A2	solute carrier family 36 member 2 [Source:HGNC Symbol;Acc:HGNC:18762]	3.16613
PRR15	proline rich 15 [Source:HGNC Symbol;Acc:HGNC:22310]	3.16273
GPR35	G protein-coupled receptor 35 [Source:HGNC Symbol;Acc:HGNC:4492]	3.15906
TRIM46	tripartite motif containing 46 [Source:HGNC Symbol;Acc:HGNC:19019]	3.15034
GPRC5C	G protein-coupled receptor class C group 5 member C [Source:HGNC Symbol;Acc:HGNC:13309]	3.13576
PI16	peptidase inhibitor 16 [Source:HGNC Symbol;Acc:HGNC:21245]	3.12675
TGM1	transglutaminase 1 [Source:HGNC Symbol;Acc:HGNC:11777]	3.1165
IL6	interleukin 6 [Source:HGNC Symbol;Acc:HGNC:6018]	3.11553
FPR1	formyl peptide receptor 1 [Source:HGNC Symbol;Acc:HGNC:3826]	3.11293
CD276	CD276 molecule [Source:HGNC Symbol;Acc:HGNC:19137]	3.10247
LTB4R	leukotriene B4 receptor [Source:HGNC Symbol;Acc:HGNC:6713]	3.09744
CASP12	caspase 12 (gene/pseudogene) [Source:HGNC Symbol;Acc:HGNC:19004]	3.09622
TNNT3	troponin T3, fast skeletal type [Source:HGNC Symbol;Acc:HGNC:11950]	3.08931
DMKN	dermokine [Source:HGNC Symbol;Acc:HGNC:25063]	3.07281
GPR171	G protein-coupled receptor 171 [Source:HGNC Symbol;Acc:HGNC:30057]	3.06854
KCNAB3	potassium voltage-gated channel subfamily A regulatory beta subunit 3 [Source:HGNC Symbol;Acc:HGNC:6230]	3.05239
SOAT2	sterol O-acyltransferase 2 [Source:HGNC Symbol;Acc:HGNC:11178]	3.03761
SOCS3	suppressor of cytokine signaling 3 [Source:HGNC Symbol;Acc:HGNC:19391]	2.95631
PLAC8	placenta associated 8 [Source:HGNC Symbol;Acc:HGNC:19254]	2.95622
BNIP3	BCL2 interacting protein 3 [Source:HGNC Symbol;Acc:HGNC:1084]	2.94043
NYAP1	neuronal tyrosine phosphorylated phosphoinositide-3-kinase adaptor 1 [Source:HGNC Symbol;Acc:HGNC:22009]	2.93056
ELOVL7	ELOVL fatty acid elongase 7 [Source:HGNC Symbol;Acc:HGNC:26292]	2.90036
CALML4	calmodulin like 4 [Source:HGNC Symbol;Acc:HGNC:18445]	2.88772
FPR2	formyl peptide receptor 2 [Source:HGNC Symbol;Acc:HGNC:3827]	2.88653
CD34	CD34 molecule [Source:HGNC Symbol;Acc:HGNC:1662]	2.88479
KDM6B	lysine demethylase 6B [Source:HGNC Symbol;Acc:HGNC:29012]	2.86931
CLEC10A	C-type lectin domain containing 10A [Source:HGNC Symbol;Acc:HGNC:16916]	2.86689
IGFBP6	insulin like growth factor binding protein 6 [Source:HGNC Symbol;Acc:HGNC:5475]	2.86126
GDA	guanine deaminase [Source:HGNC Symbol;Acc:HGNC:4212]	2.85763
HLA-DOA	major histocompatibility complex, class II, DO alpha [Source:HGNC Symbol;Acc:HGNC:4936]	2.84043
GYS1	glycogen synthase 1 [Source:HGNC Symbol;Acc:HGNC:4706]	2.83913
ADGRG1	adhesion G protein-coupled receptor G1 [Source:HGNC Symbol;Acc:HGNC:4512]	2.82736
CCR2	C-C motif chemokine receptor 2 [Source:HGNC Symbol;Acc:HGNC:1603]	2.82522
SHISA4	shisa family member 4 [Source:HGNC Symbol;Acc:HGNC:27139]	2.82313
SYNPO	synaptopodin [Source:HGNC Symbol;Acc:HGNC:30672]	2.82258
ADGB	androglobin [Source:HGNC Symbol;Acc:HGNC:21212]	2.82153
ARHGEF40	Rho guanine nucleotide exchange factor 40 [Source:HGNC Symbol;Acc:HGNC:25516]	2.8048
FLYWCH2	FLYWCH family member 2 [Source:HGNC Symbol;Acc:HGNC:25178]	2.78233
DIP2C	disco interacting protein 2 homolog C [Source:HGNC Symbol;Acc:HGNC:29150]	2.76797
LIFR	LIF receptor subunit alpha [Source:HGNC Symbol;Acc:HGNC:6597]	2.76642
NABP1	nucleic acid binding protein 1 [Source:HGNC Symbol;Acc:HGNC:26232]	2.75371
ASB11	ankyrin repeat and SOCS box containing 11 [Source:HGNC Symbol;Acc:HGNC:17186]	2.75205
CCL23	C-C motif chemokine ligand 23 [Source:HGNC Symbol;Acc:HGNC:10622]	2.7359
GFRA4	GDNF family receptor alpha 4 [Source:HGNC Symbol;Acc:HGNC:13821]	2.72856
ADAMTSL4	ADAMTS like 4 [Source:HGNC Symbol;Acc:HGNC:19706]	2.71544
ZNF568	zinc finger protein 568 [Source:HGNC Symbol;Acc:HGNC:25392]	2.6927
KLF4	Kruppel like factor 4 [Source:HGNC Symbol;Acc:HGNC:6348]	2.69018
PYCR1	pyrroline-5-carboxylate reductase 1 [Source:HGNC Symbol;Acc:HGNC:9721]	2.68816
C7orf50	chromosome 7 open reading frame 50 [Source:HGNC Symbol;Acc:HGNC:22421]	2.67857
SIGLEC1	sialic acid binding Ig like lectin 1 [Source:HGNC Symbol;Acc:HGNC:11127]	2.6733
CD209	CD209 molecule [Source:HGNC Symbol;Acc:HGNC:1641]	2.673
ZNF703	zinc finger protein 703 [Source:HGNC Symbol;Acc:HGNC:25883]	2.66809
CD2	CD2 molecule [Source:HGNC Symbol;Acc:HGNC:1639]	2.66028
SRC	SRC proto-oncogene, non-receptor tyrosine kinase [Source:HGNC Symbol;Acc:HGNC:11283]	2.66024
CAMKK1	calcium/calmodulin dependent protein kinase kinase 1 [Source:HGNC Symbol;Acc:HGNC:1469]	2.64911
AHR	aryl hydrocarbon receptor [Source:HGNC Symbol;Acc:HGNC:348]	2.63751
SCEL	sciellin [Source:HGNC Symbol;Acc:HGNC:10573]	2.63689
TXNIP	thioredoxin interacting protein [Source:HGNC Symbol;Acc:HGNC:16952]	2.63608
VNN3	vanin 3 [Source:HGNC Symbol;Acc:HGNC:16431]	2.6307
CACNB3	calcium voltage-gated channel auxiliary subunit beta 3 [Source:HGNC Symbol;Acc:HGNC:1403]	2.62955
IL4R	interleukin 4 receptor [Source:HGNC Symbol;Acc:HGNC:6015]	2.62267
RND1	Rho family GTPase 1 [Source:HGNC Symbol;Acc:HGNC:18314]	2.6036
NFIL3	nuclear factor, interleukin 3 regulated [Source:HGNC Symbol;Acc:HGNC:7787]	2.60046
MCEMP1	mast cell expressed membrane protein 1 [Source:HGNC Symbol;Acc:HGNC:27291]	2.59788
C4B	complement C4B (Chido blood group) [Source:HGNC Symbol;Acc:HGNC:1324]	2.59388
LIPG	lipase G, endothelial type [Source:HGNC Symbol;Acc:HGNC:6623]	2.58267
CCR1	C-C motif chemokine receptor 1 [Source:HGNC Symbol;Acc:HGNC:1602]	2.57651
SLC52A3	solute carrier family 52 member 3 [Source:HGNC Symbol;Acc:HGNC:16187]	2.57189
STON2	stonin 2 [Source:HGNC Symbol;Acc:HGNC:30652]	2.56614
SLAMF9	SLAM family member 9 [Source:HGNC Symbol;Acc:HGNC:18430]	2.56464
LBP	lipopolysaccharide binding protein [Source:HGNC Symbol;Acc:HGNC:6517]	2.56012
CYP2D6	cytochrome P450 family 2 subfamily D member 6 [Source:HGNC Symbol;Acc:HGNC:2625]	2.54579
EHD1	EH domain containing 1 [Source:HGNC Symbol;Acc:HGNC:3242]	2.54118
SOCS2	suppressor of cytokine signaling 2 [Source:HGNC Symbol;Acc:HGNC:19382]	2.53563
PRUNE2	prune homolog 2 with BCH domain [Source:HGNC Symbol;Acc:HGNC:25209]	2.53562
GLIPR2	GLI pathogenesis related 2 [Source:HGNC Symbol;Acc:HGNC:18007]	2.53154
CDC42EP2	CDC42 effector protein 2 [Source:HGNC Symbol;Acc:HGNC:16263]	2.524
SMO	smoothened, frizzled class receptor [Source:HGNC Symbol;Acc:HGNC:11119]	2.52252
PRELP	proline and arginine rich end leucine rich repeat protein [Source:HGNC Symbol;Acc:HGNC:9357]	2.51526
BANK1	B cell scaffold protein with ankyrin repeats 1 [Source:HGNC Symbol;Acc:HGNC:18233]	2.51258
ACP3	acid phosphatase 3 [Source:HGNC Symbol;Acc:HGNC:125]	2.50606
COL9A3	collagen type IX alpha 3 chain [Source:HGNC Symbol;Acc:HGNC:2219]	2.50255
LY6E	lymphocyte antigen 6 family member E [Source:HGNC Symbol;Acc:HGNC:6727]	2.50116
PILRA	paired immunoglobin like type 2 receptor alpha [Source:HGNC Symbol;Acc:HGNC:20396]	2.4947
PIM1	Pim-1 proto-oncogene, serine/threonine kinase [Source:HGNC Symbol;Acc:HGNC:8986]	2.49288
KLF2	Kruppel like factor 2 [Source:HGNC Symbol;Acc:HGNC:6347]	2.47323
AHRR	aryl-hydrocarbon receptor repressor [Source:HGNC Symbol;Acc:HGNC:346]	2.4614
GPR141	G protein-coupled receptor 141 [Source:HGNC Symbol;Acc:HGNC:19997]	2.45666
HOXA2	homeobox A2 [Source:HGNC Symbol;Acc:HGNC:5103]	2.45585
KCNA3	potassium voltage-gated channel subfamily A member 3 [Source:HGNC Symbol;Acc:HGNC:6221]	2.4539
OR2V1	olfactory receptor family 2 subfamily V member 1 [Source:HGNC Symbol;Acc:HGNC:8280]	2.45381
FSTL3	follistatin like 3 [Source:HGNC Symbol;Acc:HGNC:3973]	2.45234
C19orf12	chromosome 19 open reading frame 12 [Source:HGNC Symbol;Acc:HGNC:25443]	2.45162
KLF10	Kruppel like factor 10 [Source:HGNC Symbol;Acc:HGNC:11810]	2.44881
ALDH1B1	aldehyde dehydrogenase 1 family member B1 [Source:HGNC Symbol;Acc:HGNC:407]	2.4436
TARM1	T cell-interacting, activating receptor on myeloid cells 1 [Source:HGNC Symbol;Acc:HGNC:37250]	2.43332
SDCBP2	syndecan binding protein 2 [Source:HGNC Symbol;Acc:HGNC:15756]	2.43169
DAB2IP	DAB2 interacting protein [Source:HGNC Symbol;Acc:HGNC:17294]	2.42832
TLR5	toll like receptor 5 [Source:HGNC Symbol;Acc:HGNC:11851]	2.42159
ATP10A	ATPase phospholipid transporting 10A (putative) [Source:HGNC Symbol;Acc:HGNC:13542]	2.4135
LSR	lipolysis stimulated lipoprotein receptor [Source:HGNC Symbol;Acc:HGNC:29572]	2.41167
SMAD6	SMAD family member 6 [Source:HGNC Symbol;Acc:HGNC:6772]	2.41143
NECTIN2	nectin cell adhesion molecule 2 [Source:HGNC Symbol;Acc:HGNC:9707]	2.40568
PHYHD1	phytanoyl-CoA dioxygenase domain containing 1 [Source:HGNC Symbol;Acc:HGNC:23396]	2.40087
F10	coagulation factor X [Source:HGNC Symbol;Acc:HGNC:3528]	2.40082
DCK	deoxycytidine kinase [Source:HGNC Symbol;Acc:HGNC:2704]	2.39936
TMEM37	transmembrane protein 37 [Source:HGNC Symbol;Acc:HGNC:18216]	2.39903
TMEM119	transmembrane protein 119 [Source:HGNC Symbol;Acc:HGNC:27884]	2.3765
MTHFD1L	methylenetetrahydrofolate dehydrogenase (NADP+ dependent) 1 like [Source:HGNC Symbol;Acc:HGNC:21055]	2.37371
EPHB2	EPH receptor B2 [Source:HGNC Symbol;Acc:HGNC:3393]	2.36812
CASTOR1	cytosolic arginine sensor for mTORC1 subunit 1 [Source:HGNC Symbol;Acc:HGNC:34423]	2.3616
HIF1A	hypoxia inducible factor 1 subunit alpha [Source:HGNC Symbol;Acc:HGNC:4910]	2.35435
GVINP1	GTPase, very large interferon inducible pseudogene 1 [Source:HGNC Symbol;Acc:HGNC:25813]	2.34665
FCGR3A	Fc fragment of IgG receptor IIIa [Source:HGNC Symbol;Acc:HGNC:3619]	2.3464
NID2	nidogen 2 [Source:HGNC Symbol;Acc:HGNC:13389]	2.34127
GPR55	G protein-coupled receptor 55 [Source:HGNC Symbol;Acc:HGNC:4511]	2.33335
SPRY1	sprouty RTK signaling antagonist 1 [Source:HGNC Symbol;Acc:HGNC:11269]	2.33333
MPZL3	myelin protein zero like 3 [Source:HGNC Symbol;Acc:HGNC:27279]	2.33292
PDCD1LG2	programmed cell death 1 ligand 2 [Source:HGNC Symbol;Acc:HGNC:18731]	2.32985
PFKFB3	6-phosphofructo-2-kinase/fructose-2,6-biphosphatase 3 [Source:HGNC Symbol;Acc:HGNC:8874]	2.32805
PPARGC1A	PPARG coactivator 1 alpha [Source:HGNC Symbol;Acc:HGNC:9237]	2.32457
GCNT2	glucosaminyl (N-acetyl) transferase 2 (I blood group) [Source:HGNC Symbol;Acc:HGNC:4204]	2.32342
PALM	paralemmin [Source:HGNC Symbol;Acc:HGNC:8594]	2.31543
GPAT3	glycerol-3-phosphate acyltransferase 3 [Source:HGNC Symbol;Acc:HGNC:28157]	2.31304
GADD45G	growth arrest and DNA damage inducible gamma [Source:HGNC Symbol;Acc:HGNC:4097]	2.31117
ADCY4	adenylate cyclase 4 [Source:HGNC Symbol;Acc:HGNC:235]	2.31015
MUC2	mucin 2, oligomeric mucus/gel-forming [Source:HGNC Symbol;Acc:HGNC:7512]	2.29385
PRKCG	protein kinase C gamma [Source:HGNC Symbol;Acc:HGNC:9402]	2.27549
DDIT4	DNA damage inducible transcript 4 [Source:HGNC Symbol;Acc:HGNC:24944]	2.27509
CCND2	cyclin D2 [Source:HGNC Symbol;Acc:HGNC:1583]	2.27328
ELFN2	extracellular leucine rich repeat and fibronectin type III domain containing 2 [Source:HGNC Symbol;Acc:HGNC:29396]	2.27273
NAPSA	napsin A aspartic peptidase [Source:HGNC Symbol;Acc:HGNC:13395]	2.27139
BMX	BMX non-receptor tyrosine kinase [Source:HGNC Symbol;Acc:HGNC:1079]	2.26272
ITGA7	integrin subunit alpha 7 [Source:HGNC Symbol;Acc:HGNC:6143]	2.26247
CDKL5	cyclin dependent kinase like 5 [Source:HGNC Symbol;Acc:HGNC:11411]	2.25989
EFNA1	ephrin A1 [Source:HGNC Symbol;Acc:HGNC:3221]	2.25244
ADAM32	ADAM metallopeptidase domain 32 [Source:HGNC Symbol;Acc:HGNC:15479]	2.23517
DACT3	dishevelled binding antagonist of beta catenin 3 [Source:HGNC Symbol;Acc:HGNC:30745]	2.23364
CEMIP2	cell migration inducing hyaluronidase 2 [Source:HGNC Symbol;Acc:HGNC:11869]	2.22945
RAD51C	RAD51 paralog C [Source:HGNC Symbol;Acc:HGNC:9820]	2.22776
ENTPD3	ectonucleoside triphosphate diphosphohydrolase 3 [Source:HGNC Symbol;Acc:HGNC:3365]	2.2225
PRELID2	PRELI domain containing 2 [Source:HGNC Symbol;Acc:HGNC:28306]	2.22119
RUNX3	RUNX family transcription factor 3 [Source:HGNC Symbol;Acc:HGNC:10473]	2.21695
F11R	F11 receptor [Source:HGNC Symbol;Acc:HGNC:14685]	2.2162
GRHPR	glyoxylate and hydroxypyruvate reductase [Source:HGNC Symbol;Acc:HGNC:4570]	2.21207
SMIM40	small integral membrane protein 40 [Source:HGNC Symbol;Acc:HGNC:54073]	2.21035
AQP1	aquaporin 1 (Colton blood group) [Source:HGNC Symbol;Acc:HGNC:633]	2.2053
SLPI	secretory leukocyte peptidase inhibitor [Source:HGNC Symbol;Acc:HGNC:11092]	2.19969
PHGDH	phosphoglycerate dehydrogenase [Source:HGNC Symbol;Acc:HGNC:8923]	2.19887
RNF208	ring finger protein 208 [Source:HGNC Symbol;Acc:HGNC:25420]	2.19772
OPN3	opsin 3 [Source:HGNC Symbol;Acc:HGNC:14007]	2.19723
ATP7B	ATPase copper transporting beta [Source:HGNC Symbol;Acc:HGNC:870]	2.19615
OLFM1	olfactomedin 1 [Source:HGNC Symbol;Acc:HGNC:17187]	2.1946
BHLHE40	basic helix-loop-helix family member e40 [Source:HGNC Symbol;Acc:HGNC:1046]	2.19328
ZNF786	zinc finger protein 786 [Source:HGNC Symbol;Acc:HGNC:21806]	2.19184
GBGT1	globoside alpha-1,3-N-acetylgalactosaminyltransferase 1 (FORS blood group) [Source:HGNC Symbol;Acc:HGNC:20460]	2.18905
SMCO3	single-pass membrane protein with coiled-coil domains 3 [Source:HGNC Symbol;Acc:HGNC:34401]	2.1875
MSANTD3-TMEFF1	MSANTD3-TMEFF1 readthrough [Source:HGNC Symbol;Acc:HGNC:38838]	2.18573
EMILIN2	elastin microfibril interfacer 2 [Source:HGNC Symbol;Acc:HGNC:19881]	2.17637
MAP3K13	mitogen-activated protein kinase kinase kinase 13 [Source:HGNC Symbol;Acc:HGNC:6852]	2.16981
PFKL	phosphofructokinase, liver type [Source:HGNC Symbol;Acc:HGNC:8876]	2.16851
BCO2	beta-carotene oxygenase 2 [Source:HGNC Symbol;Acc:HGNC:18503]	2.16818
ARRDC4	arrestin domain containing 4 [Source:HGNC Symbol;Acc:HGNC:28087]	2.16309
SPRED3	sprouty related EVH1 domain containing 3 [Source:HGNC Symbol;Acc:HGNC:31041]	2.16293
G0S2	G0/G1 switch 2 [Source:HGNC Symbol;Acc:HGNC:30229]	2.16101
THBS1	thrombospondin 1 [Source:HGNC Symbol;Acc:HGNC:11785]	2.15834
PLPPR3	phospholipid phosphatase related 3 [Source:HGNC Symbol;Acc:HGNC:23497]	2.15278
CEBPB	CCAAT enhancer binding protein beta [Source:HGNC Symbol;Acc:HGNC:1834]	2.15079
NRM	nurim [Source:HGNC Symbol;Acc:HGNC:8003]	2.14602
CHST1	carbohydrate sulfotransferase 1 [Source:HGNC Symbol;Acc:HGNC:1969]	2.14229
MSR1	macrophage scavenger receptor 1 [Source:HGNC Symbol;Acc:HGNC:7376]	2.13646
SMPDL3B	sphingomyelin phosphodiesterase acid like 3B [Source:HGNC Symbol;Acc:HGNC:21416]	2.13039
RARA	retinoic acid receptor alpha [Source:HGNC Symbol;Acc:HGNC:9864]	2.12482
HELZ2	helicase with zinc finger 2 [Source:HGNC Symbol;Acc:HGNC:30021]	2.12442
RASGRP4	RAS guanyl releasing protein 4 [Source:HGNC Symbol;Acc:HGNC:18958]	2.12165
F7	coagulation factor VII [Source:HGNC Symbol;Acc:HGNC:3544]	2.11678
INSL3	insulin like 3 [Source:HGNC Symbol;Acc:HGNC:6086]	2.11573
LY6G6D	lymphocyte antigen 6 family member G6D [Source:HGNC Symbol;Acc:HGNC:13935]	2.1156
NOD2	nucleotide binding oligomerization domain containing 2 [Source:HGNC Symbol;Acc:HGNC:5331]	2.10684
HECW2	HECT, C2 and WW domain containing E3 ubiquitin protein ligase 2 [Source:HGNC Symbol;Acc:HGNC:29853]	2.1032
CCDC162P	coiled-coil domain containing 162, pseudogene [Source:HGNC Symbol;Acc:HGNC:21565]	2.09897
CAPSL	calcyphosine like [Source:HGNC Symbol;Acc:HGNC:28375]	2.09525
FGL2	fibrinogen like 2 [Source:HGNC Symbol;Acc:HGNC:3696]	2.09168
DUSP10	dual specificity phosphatase 10 [Source:HGNC Symbol;Acc:HGNC:3065]	2.08765
SH3D19	SH3 domain containing 19 [Source:HGNC Symbol;Acc:HGNC:30418]	2.08272
PDK1	pyruvate dehydrogenase kinase 1 [Source:HGNC Symbol;Acc:HGNC:8809]	2.07822
MAK	male germ cell associated kinase [Source:HGNC Symbol;Acc:HGNC:6816]	2.07645
HLA-DMA	major histocompatibility complex, class II, DM alpha [Source:HGNC Symbol;Acc:HGNC:4934]	2.07552
ERO1A	endoplasmic reticulum oxidoreductase 1 alpha [Source:HGNC Symbol;Acc:HGNC:13280]	2.07437
CASS4	Cas scaffold protein family member 4 [Source:HGNC Symbol;Acc:HGNC:15878]	2.07434
RGS11	regulator of G protein signaling 11 [Source:HGNC Symbol;Acc:HGNC:9993]	2.06855
RHOF	ras homolog family member F, filopodia associated [Source:HGNC Symbol;Acc:HGNC:15703]	2.06655
FCRLB	Fc receptor like B [Source:HGNC Symbol;Acc:HGNC:26431]	2.06433
ITGAM	integrin subunit alpha M [Source:HGNC Symbol;Acc:HGNC:6149]	2.06428
TUBB4A	tubulin beta 4A class IVa [Source:HGNC Symbol;Acc:HGNC:20774]	2.06286
HP	haptoglobin [Source:HGNC Symbol;Acc:HGNC:5141]	2.05975
PRTN3	proteinase 3 [Source:HGNC Symbol;Acc:HGNC:9495]	2.05951
DGKG	diacylglycerol kinase gamma [Source:HGNC Symbol;Acc:HGNC:2853]	2.05534
TPI1	triosephosphate isomerase 1 [Source:HGNC Symbol;Acc:HGNC:12009]	2.05522
TIFAB	TIFA inhibitor [Source:HGNC Symbol;Acc:HGNC:34024]	2.05398
ST7	suppression of tumorigenicity 7 [Source:HGNC Symbol;Acc:HGNC:11351]	2.04948
NT5E	5'-nucleotidase ecto [Source:HGNC Symbol;Acc:HGNC:8021]	2.04846
TREM1	triggering receptor expressed on myeloid cells 1 [Source:HGNC Symbol;Acc:HGNC:17760]	2.04707
HABP2	hyaluronan binding protein 2 [Source:HGNC Symbol;Acc:HGNC:4798]	2.04162
GCNT7	glucosaminyl (N-acetyl) transferase family member 7 [Source:HGNC Symbol;Acc:HGNC:16099]	2.04084
CCDC180	coiled-coil domain containing 180 [Source:HGNC Symbol;Acc:HGNC:29303]	2.0408
P4HA2	prolyl 4-hydroxylase subunit alpha 2 [Source:HGNC Symbol;Acc:HGNC:8547]	2.04
PGM1	phosphoglucomutase 1 [Source:HGNC Symbol;Acc:HGNC:8905]	2.03892
IL12RB1	interleukin 12 receptor subunit beta 1 [Source:HGNC Symbol;Acc:HGNC:5971]	2.03874
STAT4	signal transducer and activator of transcription 4 [Source:HGNC Symbol;Acc:HGNC:11365]	2.03752
PGK1	phosphoglycerate kinase 1 [Source:HGNC Symbol;Acc:HGNC:8896]	2.03348
CLMN	calmin [Source:HGNC Symbol;Acc:HGNC:19972]	2.02955
BNIP5	BCL2 interacting protein 5 [Source:HGNC Symbol;Acc:HGNC:33769]	2.02785
NXPE1	neurexophilin and PC-esterase domain family member 1 [Source:HGNC Symbol;Acc:HGNC:28527]	2.02652
CETN4P	centrin 4, pseudogene [Source:HGNC Symbol;Acc:HGNC:35450]	2.02283
ITGB7	integrin subunit beta 7 [Source:HGNC Symbol;Acc:HGNC:6162]	2.02212
PLXDC2	plexin domain containing 2 [Source:HGNC Symbol;Acc:HGNC:21013]	2.01529
ACLY	ATP citrate lyase [Source:HGNC Symbol;Acc:HGNC:115]	2.01481
FUT7	fucosyltransferase 7 [Source:HGNC Symbol;Acc:HGNC:4018]	2.01374
KLRB1	killer cell lectin like receptor B1 [Source:HGNC Symbol;Acc:HGNC:6373]	2.01252
RS1	retinoschisin 1 [Source:HGNC Symbol;Acc:HGNC:10457]	2.01111
CYSLTR1	cysteinyl leukotriene receptor 1 [Source:HGNC Symbol;Acc:HGNC:17451]	2.01032
PLPPR2	phospholipid phosphatase related 2 [Source:HGNC Symbol;Acc:HGNC:29566]	2.00873
CEP85L	centrosomal protein 85 like [Source:HGNC Symbol;Acc:HGNC:21638]	2.00699
MTTP	microsomal triglyceride transfer protein [Source:HGNC Symbol;Acc:HGNC:7467]	2.00599
ZFP69	ZFP69 zinc finger protein [Source:HGNC Symbol;Acc:HGNC:24708]	2.00437
ENO1	enolase 1 [Source:HGNC Symbol;Acc:HGNC:3350]	2.00387
PF4	platelet factor 4 [Source:HGNC Symbol;Acc:HGNC:8861]	2.00295
AZIN2	antizyme inhibitor 2 [Source:HGNC Symbol;Acc:HGNC:29957]	2.00146
GSDMC	gasdermin C [Source:HGNC Symbol;Acc:HGNC:7151]	2
RRAS2	RAS related 2 [Source:HGNC Symbol;Acc:HGNC:17271]	1.9995
DUSP16	dual specificity phosphatase 16 [Source:HGNC Symbol;Acc:HGNC:17909]	1.99847
TNS4	tensin 4 [Source:HGNC Symbol;Acc:HGNC:24352]	1.99051
ARHGEF19	Rho guanine nucleotide exchange factor 19 [Source:HGNC Symbol;Acc:HGNC:26604]	1.98896
GBP6	guanylate binding protein family member 6 [Source:HGNC Symbol;Acc:HGNC:25395]	1.98536
FABP7	fatty acid binding protein 7 [Source:HGNC Symbol;Acc:HGNC:3562]	1.98339
ALDH18A1	aldehyde dehydrogenase 18 family member A1 [Source:HGNC Symbol;Acc:HGNC:9722]	1.98291
KAZALD1	Kazal type serine peptidase inhibitor domain 1 [Source:HGNC Symbol;Acc:HGNC:25460]	1.97658
MAP1A	microtubule associated protein 1A [Source:HGNC Symbol;Acc:HGNC:6835]	1.96845
NEURL1	neuralized E3 ubiquitin protein ligase 1 [Source:HGNC Symbol;Acc:HGNC:7761]	1.96603
CFH	complement factor H [Source:HGNC Symbol;Acc:HGNC:4883]	1.96365
NXF2B	nuclear RNA export factor 2B [Source:HGNC Symbol;Acc:HGNC:23984]	1.9568
ADAMTS6	ADAM metallopeptidase with thrombospondin type 1 motif 6 [Source:HGNC Symbol;Acc:HGNC:222]	1.95473
MEFV	MEFV innate immuity regulator, pyrin [Source:HGNC Symbol;Acc:HGNC:6998]	1.95322
CACNA1D	calcium voltage-gated channel subunit alpha1 D [Source:HGNC Symbol;Acc:HGNC:1391]	1.9514
BATF3	basic leucine zipper ATF-like transcription factor 3 [Source:HGNC Symbol;Acc:HGNC:28915]	1.94955
DYRK3	dual specificity tyrosine phosphorylation regulated kinase 3 [Source:HGNC Symbol;Acc:HGNC:3094]	1.94723
SHCBP1L	SHC binding and spindle associated 1 like [Source:HGNC Symbol;Acc:HGNC:16788]	1.94512
PVRIG	PVR related immunoglobulin domain containing [Source:HGNC Symbol;Acc:HGNC:32190]	1.93898
KSR1	kinase suppressor of ras 1 [Source:HGNC Symbol;Acc:HGNC:6465]	1.93328
DPEP3	dipeptidase 3 [Source:HGNC Symbol;Acc:HGNC:23029]	1.93141
THRA	thyroid hormone receptor alpha [Source:HGNC Symbol;Acc:HGNC:11796]	1.9264
RAB11FIP4	RAB11 family interacting protein 4 [Source:HGNC Symbol;Acc:HGNC:30267]	1.92422
APOLD1	apolipoprotein L domain containing 1 [Source:HGNC Symbol;Acc:HGNC:25268]	1.92379
SATB1	SATB homeobox 1 [Source:HGNC Symbol;Acc:HGNC:10541]	1.91908
ALDH1L2	aldehyde dehydrogenase 1 family member L2 [Source:HGNC Symbol;Acc:HGNC:26777]	1.91812
USP44	ubiquitin specific peptidase 44 [Source:HGNC Symbol;Acc:HGNC:20064]	1.91568
CDC42BPG	CDC42 binding protein kinase gamma [Source:HGNC Symbol;Acc:HGNC:29829]	1.91196
SLC6A9	solute carrier family 6 member 9 [Source:HGNC Symbol;Acc:HGNC:11056]	1.91076
AARSD1	alanyl-tRNA synthetase domain containing 1 [Source:HGNC Symbol;Acc:HGNC:28417]	1.91027
UCK2	uridine-cytidine kinase 2 [Source:HGNC Symbol;Acc:HGNC:12562]	1.90996
ASGR2	asialoglycoprotein receptor 2 [Source:HGNC Symbol;Acc:HGNC:743]	1.90612
SUSD4	sushi domain containing 4 [Source:HGNC Symbol;Acc:HGNC:25470]	1.90125
CLYBL	citramalyl-CoA lyase [Source:HGNC Symbol;Acc:HGNC:18355]	1.89677
GLIS2	GLIS family zinc finger 2 [Source:HGNC Symbol;Acc:HGNC:29450]	1.89567
FOSL2	FOS like 2, AP-1 transcription factor subunit [Source:HGNC Symbol;Acc:HGNC:3798]	1.89558
C9orf24	chromosome 9 open reading frame 24 [Source:HGNC Symbol;Acc:HGNC:19919]	1.89546
NEAT1	nuclear paraspeckle assembly transcript 1 [Source:HGNC Symbol;Acc:HGNC:30815]	1.89492
SH3D21	SH3 domain containing 21 [Source:HGNC Symbol;Acc:HGNC:26236]	1.8945
MMP8	matrix metallopeptidase 8 [Source:HGNC Symbol;Acc:HGNC:7175]	1.89231
LDHA	lactate dehydrogenase A [Source:HGNC Symbol;Acc:HGNC:6535]	1.8922
ALDH5A1	aldehyde dehydrogenase 5 family member A1 [Source:HGNC Symbol;Acc:HGNC:408]	1.88763
RTKN	rhotekin [Source:HGNC Symbol;Acc:HGNC:10466]	1.88259
KMO	kynurenine 3-monooxygenase [Source:HGNC Symbol;Acc:HGNC:6381]	1.87806
C1S	complement C1s [Source:HGNC Symbol;Acc:HGNC:1247]	1.87596
DNMT3L	DNA methyltransferase 3 like [Source:HGNC Symbol;Acc:HGNC:2980]	1.87345
PRR33	proline rich 33 [Source:HGNC Symbol;Acc:HGNC:35118]	1.87211
MTHFD2	methylenetetrahydrofolate dehydrogenase (NADP+ dependent) 2, methenyltetrahydrofolate cyclohydrolase [Source:HGNC Symbol;Acc:HGNC:7434]	1.86922
CIART	circadian associated repressor of transcription [Source:HGNC Symbol;Acc:HGNC:25200]	1.86725
CCDC122	coiled-coil domain containing 122 [Source:HGNC Symbol;Acc:HGNC:26478]	1.86614
RNASE6	ribonuclease A family member k6 [Source:HGNC Symbol;Acc:HGNC:10048]	1.86556
AKAP7	A-kinase anchoring protein 7 [Source:HGNC Symbol;Acc:HGNC:377]	1.85429
FBXL5	F-box and leucine rich repeat protein 5 [Source:HGNC Symbol;Acc:HGNC:13602]	1.85367
PLBD1	phospholipase B domain containing 1 [Source:HGNC Symbol;Acc:HGNC:26215]	1.85262
KRT80	keratin 80 [Source:HGNC Symbol;Acc:HGNC:27056]	1.85185
FOLR2	folate receptor beta [Source:HGNC Symbol;Acc:HGNC:3793]	1.85098
IL18BP	interleukin 18 binding protein [Source:HGNC Symbol;Acc:HGNC:5987]	1.84829
ANKRD37	ankyrin repeat domain 37 [Source:HGNC Symbol;Acc:HGNC:29593]	1.8472
PCP2	Purkinje cell protein 2 [Source:HGNC Symbol;Acc:HGNC:30209]	1.84324
SERP1	stress associated endoplasmic reticulum protein 1 [Source:HGNC Symbol;Acc:HGNC:10759]	1.84062
SOX12	SRY-box transcription factor 12 [Source:HGNC Symbol;Acc:HGNC:11198]	1.8325
PPBP	pro-platelet basic protein [Source:HGNC Symbol;Acc:HGNC:9240]	1.83054
CRYBG2	crystallin beta-gamma domain containing 2 [Source:HGNC Symbol;Acc:HGNC:17295]	1.82942
OASL	2'-5'-oligoadenylate synthetase like [Source:HGNC Symbol;Acc:HGNC:8090]	1.82732
ZBP1	Z-DNA binding protein 1 [Source:HGNC Symbol;Acc:HGNC:16176]	1.82449
TNFSF9	TNF superfamily member 9 [Source:HGNC Symbol;Acc:HGNC:11939]	1.82212
MAB21L3	mab-21 like 3 [Source:HGNC Symbol;Acc:HGNC:26787]	1.82025
ARRDC3	arrestin domain containing 3 [Source:HGNC Symbol;Acc:HGNC:29263]	1.81939
SCIMP	SLP adaptor and CSK interacting membrane protein [Source:HGNC Symbol;Acc:HGNC:33504]	1.81223
CCL24	C-C motif chemokine ligand 24 [Source:HGNC Symbol;Acc:HGNC:10623]	1.80442
FCGR1A	Fc fragment of IgG receptor Ia [Source:HGNC Symbol;Acc:HGNC:3613]	1.80404
FAM162A	family with sequence similarity 162 member A [Source:HGNC Symbol;Acc:HGNC:17865]	1.80313
JARID2	jumonji and AT-rich interaction domain containing 2 [Source:HGNC Symbol;Acc:HGNC:6196]	1.80029
PLEKHG1	pleckstrin homology and RhoGEF domain containing G1 [Source:HGNC Symbol;Acc:HGNC:20884]	1.79851
SEMA4G	semaphorin 4G [Source:HGNC Symbol;Acc:HGNC:10735]	1.79665
FILIP1L	filamin A interacting protein 1 like [Source:HGNC Symbol;Acc:HGNC:24589]	1.79481
PILRB	paired immunoglobin like type 2 receptor beta [Source:HGNC Symbol;Acc:HGNC:18297]	1.79421
CSF2RB	colony stimulating factor 2 receptor subunit beta [Source:HGNC Symbol;Acc:HGNC:2436]	1.79367
ASNS	asparagine synthetase (glutamine-hydrolyzing) [Source:HGNC Symbol;Acc:HGNC:753]	1.79156
CBY3	chibby family member 3 [Source:HGNC Symbol;Acc:HGNC:33278]	1.78901
FANCA	FA complementation group A [Source:HGNC Symbol;Acc:HGNC:3582]	1.78351
PTGIR	prostaglandin I2 receptor [Source:HGNC Symbol;Acc:HGNC:9602]	1.7817
STC2	stanniocalcin 2 [Source:HGNC Symbol;Acc:HGNC:11374]	1.77792
COLEC11	collectin subfamily member 11 [Source:HGNC Symbol;Acc:HGNC:17213]	1.7767
TTC23	tetratricopeptide repeat domain 23 [Source:HGNC Symbol;Acc:HGNC:25730]	1.77667
CIB2	calcium and integrin binding family member 2 [Source:HGNC Symbol;Acc:HGNC:24579]	1.77663
COL20A1	collagen type XX alpha 1 chain [Source:HGNC Symbol;Acc:HGNC:14670]	1.76674
PVT1	Pvt1 oncogene [Source:HGNC Symbol;Acc:HGNC:9709]	1.76449
HK2	hexokinase 2 [Source:HGNC Symbol;Acc:HGNC:4923]	1.75829
TNR	tenascin R [Source:HGNC Symbol;Acc:HGNC:11953]	1.75599
LPCAT4	lysophosphatidylcholine acyltransferase 4 [Source:HGNC Symbol;Acc:HGNC:30059]	1.7556
SPON1	spondin 1 [Source:HGNC Symbol;Acc:HGNC:11252]	1.75503
FLT1	fms related receptor tyrosine kinase 1 [Source:HGNC Symbol;Acc:HGNC:3763]	1.75343
GAPT	GRB2 binding adaptor protein, transmembrane [Source:HGNC Symbol;Acc:HGNC:26588]	1.75274
FBXO36	F-box protein 36 [Source:HGNC Symbol;Acc:HGNC:27020]	1.75099
PPP1R13L	protein phosphatase 1 regulatory subunit 13 like [Source:HGNC Symbol;Acc:HGNC:18838]	1.74896
NXPE3	neurexophilin and PC-esterase domain family member 3 [Source:HGNC Symbol;Acc:HGNC:28238]	1.74847
LZTS2	leucine zipper tumor suppressor 2 [Source:HGNC Symbol;Acc:HGNC:29381]	1.74455
FNDC7	fibronectin type III domain containing 7 [Source:HGNC Symbol;Acc:HGNC:26668]	1.74419
IKZF2	IKAROS family zinc finger 2 [Source:HGNC Symbol;Acc:HGNC:13177]	1.74208
HSPA1A	heat shock protein family A (Hsp70) member 1A [Source:HGNC Symbol;Acc:HGNC:5232]	1.74134
EPS8	epidermal growth factor receptor pathway substrate 8 [Source:HGNC Symbol;Acc:HGNC:3420]	1.7346
STARD10	StAR related lipid transfer domain containing 10 [Source:HGNC Symbol;Acc:HGNC:10666]	1.73077
F13A1	coagulation factor XIII A chain [Source:HGNC Symbol;Acc:HGNC:3531]	1.73035
TCP10L2	t-complex 10 like 2, pseudogene [Source:HGNC Symbol;Acc:HGNC:21254]	1.72269
KCNAB1	potassium voltage-gated channel subfamily A member regulatory beta subunit 1 [Source:HGNC Symbol;Acc:HGNC:6228]	1.72243
RGL1	ral guanine nucleotide dissociation stimulator like 1 [Source:HGNC Symbol;Acc:HGNC:30281]	1.71871
KIF9	kinesin family member 9 [Source:HGNC Symbol;Acc:HGNC:16666]	1.71671
PYGL	glycogen phosphorylase L [Source:HGNC Symbol;Acc:HGNC:9725]	1.71458
RECK	reversion inducing cysteine rich protein with kazal motifs [Source:HGNC Symbol;Acc:HGNC:11345]	1.71313
CDH1	cadherin 1 [Source:HGNC Symbol;Acc:HGNC:1748]	1.71088
EPHA2	EPH receptor A2 [Source:HGNC Symbol;Acc:HGNC:3386]	1.70965
CHRNB1	cholinergic receptor nicotinic beta 1 subunit [Source:HGNC Symbol;Acc:HGNC:1961]	1.70776
C1orf162	chromosome 1 open reading frame 162 [Source:HGNC Symbol;Acc:HGNC:28344]	1.70764
LTBP3	latent transforming growth factor beta binding protein 3 [Source:HGNC Symbol;Acc:HGNC:6716]	1.70569
DENND4A	DENN domain containing 4A [Source:HGNC Symbol;Acc:HGNC:24321]	1.70284
HDAC7	histone deacetylase 7 [Source:HGNC Symbol;Acc:HGNC:14067]	1.7007
SFMBT2	Scm like with four mbt domains 2 [Source:HGNC Symbol;Acc:HGNC:20256]	1.70011
ZDHHC23	zinc finger DHHC-type palmitoyltransferase 23 [Source:HGNC Symbol;Acc:HGNC:28654]	1.6937
GSTA1	glutathione S-transferase alpha 1 [Source:HGNC Symbol;Acc:HGNC:4626]	1.6926
RFX2	regulatory factor X2 [Source:HGNC Symbol;Acc:HGNC:9983]	1.69048
ZFPM1	zinc finger protein, FOG family member 1 [Source:HGNC Symbol;Acc:HGNC:19762]	1.6831
NRAP	nebulin related anchoring protein [Source:HGNC Symbol;Acc:HGNC:7988]	1.68212
LRRC8C	leucine rich repeat containing 8 VRAC subunit C [Source:HGNC Symbol;Acc:HGNC:25075]	1.67894
FKBP5	FKBP prolyl isomerase 5 [Source:HGNC Symbol;Acc:HGNC:3721]	1.67857
RAB3D	RAB3D, member RAS oncogene family [Source:HGNC Symbol;Acc:HGNC:9779]	1.67422
WIPI1	WD repeat domain, phosphoinositide interacting 1 [Source:HGNC Symbol;Acc:HGNC:25471]	1.6736
PMEPA1	prostate transmembrane protein, androgen induced 1 [Source:HGNC Symbol;Acc:HGNC:14107]	1.67252
PGAP3	post-GPI attachment to proteins phospholipase 3 [Source:HGNC Symbol;Acc:HGNC:23719]	1.66667
ACP5	acid phosphatase 5, tartrate resistant [Source:HGNC Symbol;Acc:HGNC:124]	1.6646
C3orf18	chromosome 3 open reading frame 18 [Source:HGNC Symbol;Acc:HGNC:24837]	1.66187
FAM217B	family with sequence similarity 217 member B [Source:HGNC Symbol;Acc:HGNC:16170]	1.66131
AGRN	agrin [Source:HGNC Symbol;Acc:HGNC:329]	1.65882
JMJD7	jumonji domain containing 7 [Source:HGNC Symbol;Acc:HGNC:34397]	1.6491
SLFN12	schlafen family member 12 [Source:HGNC Symbol;Acc:HGNC:25500]	1.64439
INPP5J	inositol polyphosphate-5-phosphatase J [Source:HGNC Symbol;Acc:HGNC:8956]	1.64416
IMPA2	inositol monophosphatase 2 [Source:HGNC Symbol;Acc:HGNC:6051]	1.63624
PYCARD	PYD and CARD domain containing [Source:HGNC Symbol;Acc:HGNC:16608]	1.6359
SALL2	spalt like transcription factor 2 [Source:HGNC Symbol;Acc:HGNC:10526]	1.63126
C2orf81	chromosome 2 open reading frame 81 [Source:HGNC Symbol;Acc:HGNC:34350]	1.63056
SESN2	sestrin 2 [Source:HGNC Symbol;Acc:HGNC:20746]	1.63005
RIPK3	receptor interacting serine/threonine kinase 3 [Source:HGNC Symbol;Acc:HGNC:10021]	1.62966
JDP2	Jun dimerization protein 2 [Source:HGNC Symbol;Acc:HGNC:17546]	1.62763
ID3	inhibitor of DNA binding 3, HLH protein [Source:HGNC Symbol;Acc:HGNC:5362]	1.62651
RARRES2	retinoic acid receptor responder 2 [Source:HGNC Symbol;Acc:HGNC:9868]	1.6246
GPC2	glypican 2 [Source:HGNC Symbol;Acc:HGNC:4450]	1.62457
OAS3	2'-5'-oligoadenylate synthetase 3 [Source:HGNC Symbol;Acc:HGNC:8088]	1.62148
PTGS1	prostaglandin-endoperoxide synthase 1 [Source:HGNC Symbol;Acc:HGNC:9604]	1.62051
ST3GAL4	ST3 beta-galactoside alpha-2,3-sialyltransferase 4 [Source:HGNC Symbol;Acc:HGNC:10864]	1.61675
PDE4D	phosphodiesterase 4D [Source:HGNC Symbol;Acc:HGNC:8783]	1.61447
MTUS1	microtubule associated scaffold protein 1 [Source:HGNC Symbol;Acc:HGNC:29789]	1.61328
JAK3	Janus kinase 3 [Source:HGNC Symbol;Acc:HGNC:6193]	1.60784
CLCN1	chloride voltage-gated channel 1 [Source:HGNC Symbol;Acc:HGNC:2019]	1.60707
NDRG1	N-myc downstream regulated 1 [Source:HGNC Symbol;Acc:HGNC:7679]	1.60684
RELT	RELT TNF receptor [Source:HGNC Symbol;Acc:HGNC:13764]	1.60594
RUNX2	RUNX family transcription factor 2 [Source:HGNC Symbol;Acc:HGNC:10472]	1.6
CTSC	cathepsin C [Source:HGNC Symbol;Acc:HGNC:2528]	1.599
BTNL2	butyrophilin like 2 [Source:HGNC Symbol;Acc:HGNC:1142]	1.59421
SLC14A1	solute carrier family 14 member 1 (Kidd blood group) [Source:HGNC Symbol;Acc:HGNC:10918]	1.59056
FUT8	fucosyltransferase 8 [Source:HGNC Symbol;Acc:HGNC:4019]	1.59017
SLC16A8	solute carrier family 16 member 8 [Source:HGNC Symbol;Acc:HGNC:16270]	1.58895
SEMA3B	semaphorin 3B [Source:HGNC Symbol;Acc:HGNC:10724]	1.58771
PPP1R3B	protein phosphatase 1 regulatory subunit 3B [Source:HGNC Symbol;Acc:HGNC:14942]	1.58669
B9D1	B9 domain containing 1 [Source:HGNC Symbol;Acc:HGNC:24123]	1.58664
KDM5B	lysine demethylase 5B [Source:HGNC Symbol;Acc:HGNC:18039]	1.58587
MST1	macrophage stimulating 1 [Source:HGNC Symbol;Acc:HGNC:7380]	1.58539
RHOH	ras homolog family member H [Source:HGNC Symbol;Acc:HGNC:686]	1.5823
FN1	fibronectin 1 [Source:HGNC Symbol;Acc:HGNC:3778]	1.58213
IL1A	interleukin 1 alpha [Source:HGNC Symbol;Acc:HGNC:5991]	1.5783
NXN	nucleoredoxin [Source:HGNC Symbol;Acc:HGNC:18008]	1.57732
TDGF1	teratocarcinoma-derived growth factor 1 [Source:HGNC Symbol;Acc:HGNC:11701]	1.57585
CAND2	cullin associated and neddylation dissociated 2 (putative) [Source:HGNC Symbol;Acc:HGNC:30689]	1.57321
IL13RA1	interleukin 13 receptor subunit alpha 1 [Source:HGNC Symbol;Acc:HGNC:5974]	1.56833
PER2	period circadian regulator 2 [Source:HGNC Symbol;Acc:HGNC:8846]	1.56655
TLCD3B	TLC domain containing 3B [Source:HGNC Symbol;Acc:HGNC:25295]	1.56505
PDLIM1	PDZ and LIM domain 1 [Source:HGNC Symbol;Acc:HGNC:2067]	1.56356
LSP1	lymphocyte specific protein 1 [Source:HGNC Symbol;Acc:HGNC:6707]	1.56252
ARHGEF5	Rho guanine nucleotide exchange factor 5 [Source:HGNC Symbol;Acc:HGNC:13209]	1.56241
ABCD2	ATP binding cassette subfamily D member 2 [Source:HGNC Symbol;Acc:HGNC:66]	1.56092
FGF11	fibroblast growth factor 11 [Source:HGNC Symbol;Acc:HGNC:3667]	1.56085
SELENBP1	selenium binding protein 1 [Source:HGNC Symbol;Acc:HGNC:10719]	1.55482
IL1B	interleukin 1 beta [Source:HGNC Symbol;Acc:HGNC:5992]	1.55464
C1QA	complement C1q A chain [Source:HGNC Symbol;Acc:HGNC:1241]	1.55348
VIL1	villin 1 [Source:HGNC Symbol;Acc:HGNC:12690]	1.54701
NAP1L5	nucleosome assembly protein 1 like 5 [Source:HGNC Symbol;Acc:HGNC:19968]	1.54701
RBPJ	recombination signal binding protein for immunoglobulin kappa J region [Source:HGNC Symbol;Acc:HGNC:5724]	1.5468
CD40	CD40 molecule [Source:HGNC Symbol;Acc:HGNC:11919]	1.54567
GBP7	guanylate binding protein 7 [Source:HGNC Symbol;Acc:HGNC:29606]	1.5437
KLF11	Kruppel like factor 11 [Source:HGNC Symbol;Acc:HGNC:11811]	1.54225
TTC39B	tetratricopeptide repeat domain 39B [Source:HGNC Symbol;Acc:HGNC:23704]	1.53945
PRDX5	peroxiredoxin 5 [Source:HGNC Symbol;Acc:HGNC:9355]	1.53728
TFEC	transcription factor EC [Source:HGNC Symbol;Acc:HGNC:11754]	1.53591
TNNC1	troponin C1, slow skeletal and cardiac type [Source:HGNC Symbol;Acc:HGNC:11943]	1.53507
NFE2	nuclear factor, erythroid 2 [Source:HGNC Symbol;Acc:HGNC:7780]	1.53478
IMPDH1	inosine monophosphate dehydrogenase 1 [Source:HGNC Symbol;Acc:HGNC:6052]	1.53128
SCARF1	scavenger receptor class F member 1 [Source:HGNC Symbol;Acc:HGNC:16820]	1.53009
IL6ST	interleukin 6 signal transducer [Source:HGNC Symbol;Acc:HGNC:6021]	1.52918
DMWD	DM1 locus, WD repeat containing [Source:HGNC Symbol;Acc:HGNC:2936]	1.52872
BIN2	bridging integrator 2 [Source:HGNC Symbol;Acc:HGNC:1053]	1.52772
CCDC141	coiled-coil domain containing 141 [Source:HGNC Symbol;Acc:HGNC:26821]	1.52753
HYAL3	hyaluronidase 3 [Source:HGNC Symbol;Acc:HGNC:5322]	1.52482
FAM43A	family with sequence similarity 43 member A [Source:HGNC Symbol;Acc:HGNC:26888]	1.52421
GSG1	germ cell associated 1 [Source:HGNC Symbol;Acc:HGNC:19716]	1.52393
RD3	retinal degeneration 3, GUCY2D regulator [Source:HGNC Symbol;Acc:HGNC:19689]	1.5232
TRIM7	tripartite motif containing 7 [Source:HGNC Symbol;Acc:HGNC:16278]	1.52001
CCDC86	coiled-coil domain containing 86 [Source:HGNC Symbol;Acc:HGNC:28359]	1.51988
BTG1	BTG anti-proliferation factor 1 [Source:HGNC Symbol;Acc:HGNC:1130]	1.51734
GAPDH	glyceraldehyde-3-phosphate dehydrogenase [Source:HGNC Symbol;Acc:HGNC:4141]	1.51508
NIPSNAP1	nipsnap homolog 1 [Source:HGNC Symbol;Acc:HGNC:7827]	1.51385
ABCA8	ATP binding cassette subfamily A member 8 [Source:HGNC Symbol;Acc:HGNC:38]	1.51346
ZFP36L1	ZFP36 ring finger protein like 1 [Source:HGNC Symbol;Acc:HGNC:1107]	1.51283
ARHGEF25	Rho guanine nucleotide exchange factor 25 [Source:HGNC Symbol;Acc:HGNC:30275]	1.51277
ARHGEF10	Rho guanine nucleotide exchange factor 10 [Source:HGNC Symbol;Acc:HGNC:14103]	1.51273
SIPA1L1	signal induced proliferation associated 1 like 1 [Source:HGNC Symbol;Acc:HGNC:20284]	1.51153
TRAPPC6A	trafficking protein particle complex 6A [Source:HGNC Symbol;Acc:HGNC:23069]	1.51082
PIK3IP1	phosphoinositide-3-kinase interacting protein 1 [Source:HGNC Symbol;Acc:HGNC:24942]	1.51053
CA5B	carbonic anhydrase 5B [Source:HGNC Symbol;Acc:HGNC:1378]	1.51045
TTC26	tetratricopeptide repeat domain 26 [Source:HGNC Symbol;Acc:HGNC:21882]	1.50985
PPEF2	protein phosphatase with EF-hand domain 2 [Source:HGNC Symbol;Acc:HGNC:9244]	1.50895
EVA1B	eva-1 homolog B [Source:HGNC Symbol;Acc:HGNC:25558]	1.50628
GYPC	glycophorin C (Gerbich blood group) [Source:HGNC Symbol;Acc:HGNC:4704]	1.4976
REEP6	receptor accessory protein 6 [Source:HGNC Symbol;Acc:HGNC:30078]	1.49508
CELA1	chymotrypsin like elastase 1 [Source:HGNC Symbol;Acc:HGNC:3308]	1.49325
PROX2	prospero homeobox 2 [Source:HGNC Symbol;Acc:HGNC:26715]	1.48889
ARSG	arylsulfatase G [Source:HGNC Symbol;Acc:HGNC:24102]	1.48832
GCM2	glial cells missing transcription factor 2 [Source:HGNC Symbol;Acc:HGNC:4198]	1.48588
KLF7	Kruppel like factor 7 [Source:HGNC Symbol;Acc:HGNC:6350]	1.48484
FZD4	frizzled class receptor 4 [Source:HGNC Symbol;Acc:HGNC:4042]	1.48456
KLHL10	kelch like family member 10 [Source:HGNC Symbol;Acc:HGNC:18829]	1.48414
MGST2	microsomal glutathione S-transferase 2 [Source:HGNC Symbol;Acc:HGNC:7063]	1.4834
FOLR1	folate receptor alpha [Source:HGNC Symbol;Acc:HGNC:3791]	1.47799
CDH24	cadherin 24 [Source:HGNC Symbol;Acc:HGNC:14265]	1.47719
SLC2A1	solute carrier family 2 member 1 [Source:HGNC Symbol;Acc:HGNC:11005]	1.47367
ABI3	ABI family member 3 [Source:HGNC Symbol;Acc:HGNC:29859]	1.4734
LILRB5	leukocyte immunoglobulin like receptor B5 [Source:HGNC Symbol;Acc:HGNC:6609]	1.47209
TAP1	transporter 1, ATP binding cassette subfamily B member [Source:HGNC Symbol;Acc:HGNC:43]	1.47143
CD274	CD274 molecule [Source:HGNC Symbol;Acc:HGNC:17635]	1.47081
EGLN1	egl-9 family hypoxia inducible factor 1 [Source:HGNC Symbol;Acc:HGNC:1232]	1.47
RNF157	ring finger protein 157 [Source:HGNC Symbol;Acc:HGNC:29402]	1.46996
EMX2	empty spiracles homeobox 2 [Source:HGNC Symbol;Acc:HGNC:3341]	1.4641
ITIH5	inter-alpha-trypsin inhibitor heavy chain 5 [Source:HGNC Symbol;Acc:HGNC:21449]	1.4641
SLC12A5	solute carrier family 12 member 5 [Source:HGNC Symbol;Acc:HGNC:13818]	1.4625
PNKP	polynucleotide kinase 3'-phosphatase [Source:HGNC Symbol;Acc:HGNC:9154]	1.45464
HLCS	holocarboxylase synthetase [Source:HGNC Symbol;Acc:HGNC:4976]	1.45407
TNFRSF9	TNF receptor superfamily member 9 [Source:HGNC Symbol;Acc:HGNC:11924]	1.45375
BCL2A1	BCL2 related protein A1 [Source:HGNC Symbol;Acc:HGNC:991]	1.45098
CCDC9B	coiled-coil domain containing 9B [Source:HGNC Symbol;Acc:HGNC:33488]	1.44838
RNF122	ring finger protein 122 [Source:HGNC Symbol;Acc:HGNC:21147]	1.44811
GPI	glucose-6-phosphate isomerase [Source:HGNC Symbol;Acc:HGNC:4458]	1.44806
ANKRD55	ankyrin repeat domain 55 [Source:HGNC Symbol;Acc:HGNC:25681]	1.44796
C16orf46	chromosome 16 open reading frame 46 [Source:HGNC Symbol;Acc:HGNC:26525]	1.44661
CYP11A1	cytochrome P450 family 11 subfamily A member 1 [Source:HGNC Symbol;Acc:HGNC:2590]	1.44655
KRTCAP2	keratinocyte associated protein 2 [Source:HGNC Symbol;Acc:HGNC:28942]	1.44654
TTC39C	tetratricopeptide repeat domain 39C [Source:HGNC Symbol;Acc:HGNC:26595]	1.44458
ITGAL	integrin subunit alpha L [Source:HGNC Symbol;Acc:HGNC:6148]	1.44294
P2RX3	purinergic receptor P2X 3 [Source:HGNC Symbol;Acc:HGNC:8534]	1.44284
SLAMF6	SLAM family member 6 [Source:HGNC Symbol;Acc:HGNC:21392]	1.44235
PLAG1	PLAG1 zinc finger [Source:HGNC Symbol;Acc:HGNC:9045]	1.44183
TMC8	transmembrane channel like 8 [Source:HGNC Symbol;Acc:HGNC:20474]	1.44074
ARMCX2	armadillo repeat containing X-linked 2 [Source:HGNC Symbol;Acc:HGNC:16869]	1.44049
GLRX	glutaredoxin [Source:HGNC Symbol;Acc:HGNC:4330]	1.43876
ITPR1	inositol 1,4,5-trisphosphate receptor type 1 [Source:HGNC Symbol;Acc:HGNC:6180]	1.43739
KIF19	kinesin family member 19 [Source:HGNC Symbol;Acc:HGNC:26735]	1.43733
RDH16	retinol dehydrogenase 16 [Source:HGNC Symbol;Acc:HGNC:29674]	1.43279
NICN1	nicolin 1 [Source:HGNC Symbol;Acc:HGNC:18317]	1.43254
DNM1	dynamin 1 [Source:HGNC Symbol;Acc:HGNC:2972]	1.43186
OTUB2	OTU deubiquitinase, ubiquitin aldehyde binding 2 [Source:HGNC Symbol;Acc:HGNC:20351]	1.43075
NOCT	nocturnin [Source:HGNC Symbol;Acc:HGNC:14254]	1.4307
GPR132	G protein-coupled receptor 132 [Source:HGNC Symbol;Acc:HGNC:17482]	1.42753
PTGER4	prostaglandin E receptor 4 [Source:HGNC Symbol;Acc:HGNC:9596]	1.42628
GFPT2	glutamine-fructose-6-phosphate transaminase 2 [Source:HGNC Symbol;Acc:HGNC:4242]	1.42526
STX1B	syntaxin 1B [Source:HGNC Symbol;Acc:HGNC:18539]	1.42526
RAD9B	RAD9 checkpoint clamp component B [Source:HGNC Symbol;Acc:HGNC:21700]	1.42358
AHDC1	AT-hook DNA binding motif containing 1 [Source:HGNC Symbol;Acc:HGNC:25230]	1.42336
ADORA2A	adenosine A2a receptor [Source:HGNC Symbol;Acc:HGNC:263]	1.42281
SLC1A4	solute carrier family 1 member 4 [Source:HGNC Symbol;Acc:HGNC:10942]	1.41977
SERPINB8	serpin family B member 8 [Source:HGNC Symbol;Acc:HGNC:8952]	1.41965
PDGFRL	platelet derived growth factor receptor like [Source:HGNC Symbol;Acc:HGNC:8805]	1.41757
MAPK13	mitogen-activated protein kinase 13 [Source:HGNC Symbol;Acc:HGNC:6875]	1.41548
KISS1R	KISS1 receptor [Source:HGNC Symbol;Acc:HGNC:4510]	1.41544
EFNA2	ephrin A2 [Source:HGNC Symbol;Acc:HGNC:3222]	1.41444
SLC49A3	solute carrier family 49 member 3 [Source:HGNC Symbol;Acc:HGNC:26177]	1.41392
B3GNT7	UDP-GlcNAc:betaGal beta-1,3-N-acetylglucosaminyltransferase 7 [Source:HGNC Symbol;Acc:HGNC:18811]	1.40938
KIF7	kinesin family member 7 [Source:HGNC Symbol;Acc:HGNC:30497]	1.40682
ADD3	adducin 3 [Source:HGNC Symbol;Acc:HGNC:245]	1.40622
HS3ST6	heparan sulfate-glucosamine 3-sulfotransferase 6 [Source:HGNC Symbol;Acc:HGNC:14178]	1.40572
SMIM38	small integral membrane protein 38 [Source:HGNC Symbol;Acc:HGNC:54074]	1.4045
PKD1L2	polycystin 1 like 2 (gene/pseudogene) [Source:HGNC Symbol;Acc:HGNC:21715]	1.40411
CNN2	calponin 2 [Source:HGNC Symbol;Acc:HGNC:2156]	1.4037
CIDEB	cell death inducing DFFA like effector b [Source:HGNC Symbol;Acc:HGNC:1977]	1.40133
GPR62	G protein-coupled receptor 62 [Source:HGNC Symbol;Acc:HGNC:13301]	1.40127
PICALM	phosphatidylinositol binding clathrin assembly protein [Source:HGNC Symbol;Acc:HGNC:15514]	1.40084
DQX1	DEAQ-box RNA dependent ATPase 1 [Source:HGNC Symbol;Acc:HGNC:20410]	1.40062
PGAM1	phosphoglycerate mutase 1 [Source:HGNC Symbol;Acc:HGNC:8888]	1.39998
FGR	FGR proto-oncogene, Src family tyrosine kinase [Source:HGNC Symbol;Acc:HGNC:3697]	1.39967
CXCL14	C-X-C motif chemokine ligand 14 [Source:HGNC Symbol;Acc:HGNC:10640]	1.39923
CDKN1A	cyclin dependent kinase inhibitor 1A [Source:HGNC Symbol;Acc:HGNC:1784]	1.3954
ALOXE3	arachidonate lipoxygenase 3 [Source:HGNC Symbol;Acc:HGNC:13743]	1.39497
AJUBA	ajuba LIM protein [Source:HGNC Symbol;Acc:HGNC:20250]	1.39469
CATSPERZ	catsper channel auxiliary subunit zeta [Source:HGNC Symbol;Acc:HGNC:19231]	1.39297
USP22	ubiquitin specific peptidase 22 [Source:HGNC Symbol;Acc:HGNC:12621]	1.3915
RIPPLY3	ripply transcriptional repressor 3 [Source:HGNC Symbol;Acc:HGNC:3047]	1.39125
ALDOC	aldolase, fructose-bisphosphate C [Source:HGNC Symbol;Acc:HGNC:418]	1.39098
PADI4	peptidyl arginine deiminase 4 [Source:HGNC Symbol;Acc:HGNC:18368]	1.39058
KCTD17	potassium channel tetramerization domain containing 17 [Source:HGNC Symbol;Acc:HGNC:25705]	1.38454
DAB2	DAB adaptor protein 2 [Source:HGNC Symbol;Acc:HGNC:2662]	1.38315
ATP10D	ATPase phospholipid transporting 10D (putative) [Source:HGNC Symbol;Acc:HGNC:13549]	1.38288
SDC3	syndecan 3 [Source:HGNC Symbol;Acc:HGNC:10660]	1.3803
CCDC17	coiled-coil domain containing 17 [Source:HGNC Symbol;Acc:HGNC:26574]	1.3786
MAPK4	mitogen-activated protein kinase 4 [Source:HGNC Symbol;Acc:HGNC:6878]	1.3765
RAB37	RAB37, member RAS oncogene family [Source:HGNC Symbol;Acc:HGNC:30268]	1.37554
UPP1	uridine phosphorylase 1 [Source:HGNC Symbol;Acc:HGNC:12576]	1.37446
P2RY13	purinergic receptor P2Y13 [Source:HGNC Symbol;Acc:HGNC:4537]	1.37235
ALOX5	arachidonate 5-lipoxygenase [Source:HGNC Symbol;Acc:HGNC:435]	1.3721
EIF4EBP1	eukaryotic translation initiation factor 4E binding protein 1 [Source:HGNC Symbol;Acc:HGNC:3288]	1.36906
RWDD2A	RWD domain containing 2A [Source:HGNC Symbol;Acc:HGNC:21385]	1.36886
TREML2	triggering receptor expressed on myeloid cells like 2 [Source:HGNC Symbol;Acc:HGNC:21092]	1.36832
CORO2A	coronin 2A [Source:HGNC Symbol;Acc:HGNC:2255]	1.36246
MGAT4A	alpha-1,3-mannosyl-glycoprotein 4-beta-N-acetylglucosaminyltransferase A [Source:HGNC Symbol;Acc:HGNC:7047]	1.36131
MARCHF1	membrane associated ring-CH-type finger 1 [Source:HGNC Symbol;Acc:HGNC:26077]	1.36099
SPHK1	sphingosine kinase 1 [Source:HGNC Symbol;Acc:HGNC:11240]	1.36097
GPR176	G protein-coupled receptor 176 [Source:HGNC Symbol;Acc:HGNC:32370]	1.36039
OSCP1	organic solute carrier partner 1 [Source:HGNC Symbol;Acc:HGNC:29971]	1.35825
MYO19	myosin XIX [Source:HGNC Symbol;Acc:HGNC:26234]	1.35734
PPM1J	protein phosphatase, Mg2+/Mn2+ dependent 1J [Source:HGNC Symbol;Acc:HGNC:20785]	1.35703
ENPP5	ectonucleotide pyrophosphatase/phosphodiesterase family member 5 [Source:HGNC Symbol;Acc:HGNC:13717]	1.35483
RASD1	ras related dexamethasone induced 1 [Source:HGNC Symbol;Acc:HGNC:15828]	1.35359
TSPAN32	tetraspanin 32 [Source:HGNC Symbol;Acc:HGNC:13410]	1.35308
SBK1	SH3 domain binding kinase 1 [Source:HGNC Symbol;Acc:HGNC:17699]	1.35244
PLEKHG2	pleckstrin homology and RhoGEF domain containing G2 [Source:HGNC Symbol;Acc:HGNC:29515]	1.35025
PLEKHH1	pleckstrin homology, MyTH4 and FERM domain containing H1 [Source:HGNC Symbol;Acc:HGNC:17733]	1.34972
IQCD	IQ motif containing D [Source:HGNC Symbol;Acc:HGNC:25168]	1.34908
AK1	adenylate kinase 1 [Source:HGNC Symbol;Acc:HGNC:361]	1.3449
IER3	immediate early response 3 [Source:HGNC Symbol;Acc:HGNC:5392]	1.34431
CDNF	cerebral dopamine neurotrophic factor [Source:HGNC Symbol;Acc:HGNC:24913]	1.34301
MICAL3	microtubule associated monooxygenase, calponin and LIM domain containing 3 [Source:HGNC Symbol;Acc:HGNC:24694]	1.34213
MAML3	mastermind like transcriptional coactivator 3 [Source:HGNC Symbol;Acc:HGNC:16272]	1.33975
JAM2	junctional adhesion molecule 2 [Source:HGNC Symbol;Acc:HGNC:14686]	1.33934
NPL	N-acetylneuraminate pyruvate lyase [Source:HGNC Symbol;Acc:HGNC:16781]	1.3371
ARID5A	AT-rich interaction domain 5A [Source:HGNC Symbol;Acc:HGNC:17361]	1.33493
AFMID	arylformamidase [Source:HGNC Symbol;Acc:HGNC:20910]	1.33363
CDR2L	cerebellar degeneration related protein 2 like [Source:HGNC Symbol;Acc:HGNC:29999]	1.33333
RAB27A	RAB27A, member RAS oncogene family [Source:HGNC Symbol;Acc:HGNC:9766]	1.33307
CRYZ	crystallin zeta [Source:HGNC Symbol;Acc:HGNC:2419]	1.33204
ZNF487	zinc finger protein 487 [Source:HGNC Symbol;Acc:HGNC:23488]	1.33132
EMB	embigin [Source:HGNC Symbol;Acc:HGNC:30465]	1.32883
OAS2	2'-5'-oligoadenylate synthetase 2 [Source:HGNC Symbol;Acc:HGNC:8087]	1.32871
SELENOW	selenoprotein W [Source:HGNC Symbol;Acc:HGNC:10752]	1.32866
VPS37D	VPS37D subunit of ESCRT-I [Source:HGNC Symbol;Acc:HGNC:18287]	1.32807
ARHGEF37	Rho guanine nucleotide exchange factor 37 [Source:HGNC Symbol;Acc:HGNC:34430]	1.32712
LBH	LBH regulator of WNT signaling pathway [Source:HGNC Symbol;Acc:HGNC:29532]	1.32672
BACH2	BTB domain and CNC homolog 2 [Source:HGNC Symbol;Acc:HGNC:14078]	1.32664
DMPK	DM1 protein kinase [Source:HGNC Symbol;Acc:HGNC:2933]	1.32613
DENND3	DENN domain containing 3 [Source:HGNC Symbol;Acc:HGNC:29134]	1.32528
C1orf198	chromosome 1 open reading frame 198 [Source:HGNC Symbol;Acc:HGNC:25900]	1.32515
C16orf54	chromosome 16 open reading frame 54 [Source:HGNC Symbol;Acc:HGNC:26649]	1.32452
ECM1	extracellular matrix protein 1 [Source:HGNC Symbol;Acc:HGNC:3153]	1.32421
TIAM2	TIAM Rac1 associated GEF 2 [Source:HGNC Symbol;Acc:HGNC:11806]	1.32356
PNP	purine nucleoside phosphorylase [Source:HGNC Symbol;Acc:HGNC:7892]	1.32238
SMPD5	sphingomyelin phosphodiesterase 5 (pseudogene) [Source:HGNC Symbol;Acc:HGNC:52275]	1.32234
UGCG	UDP-glucose ceramide glucosyltransferase [Source:HGNC Symbol;Acc:HGNC:12524]	1.32088
NET1	neuroepithelial cell transforming 1 [Source:HGNC Symbol;Acc:HGNC:14592]	1.32053
SCRT2	scratch family transcriptional repressor 2 [Source:HGNC Symbol;Acc:HGNC:15952]	1.31902
ATOH8	atonal bHLH transcription factor 8 [Source:HGNC Symbol;Acc:HGNC:24126]	1.31881
NRIP1	nuclear receptor interacting protein 1 [Source:HGNC Symbol;Acc:HGNC:8001]	1.31848
NRTN	neurturin [Source:HGNC Symbol;Acc:HGNC:8007]	1.31835
CLCF1	cardiotrophin like cytokine factor 1 [Source:HGNC Symbol;Acc:HGNC:17412]	1.31723
LPP	LIM domain containing preferred translocation partner in lipoma [Source:HGNC Symbol;Acc:HGNC:6679]	1.30882
CYP26B1	cytochrome P450 family 26 subfamily B member 1 [Source:HGNC Symbol;Acc:HGNC:20581]	1.30816
CHSY1	chondroitin sulfate synthase 1 [Source:HGNC Symbol;Acc:HGNC:17198]	1.30772
FCGR2A	Fc fragment of IgG receptor IIa [Source:HGNC Symbol;Acc:HGNC:3616]	1.30665
SLC9A3R2	SLC9A3 regulator 2 [Source:HGNC Symbol;Acc:HGNC:11076]	1.30632
CMKLR1	chemerin chemokine-like receptor 1 [Source:HGNC Symbol;Acc:HGNC:2121]	1.30581
P2RY10	P2Y receptor family member 10 [Source:HGNC Symbol;Acc:HGNC:19906]	1.3016
MAGEE1	MAGE family member E1 [Source:HGNC Symbol;Acc:HGNC:24934]	1.30137
ITPR3	inositol 1,4,5-trisphosphate receptor type 3 [Source:HGNC Symbol;Acc:HGNC:6182]	1.29765
METTL26	methyltransferase like 26 [Source:HGNC Symbol;Acc:HGNC:14141]	1.29716
FAM117B	family with sequence similarity 117 member B [Source:HGNC Symbol;Acc:HGNC:14440]	1.29623
BMP5	bone morphogenetic protein 5 [Source:HGNC Symbol;Acc:HGNC:1072]	1.29284
HIC1	HIC ZBTB transcriptional repressor 1 [Source:HGNC Symbol;Acc:HGNC:4909]	1.28837
WWTR1	WW domain containing transcription regulator 1 [Source:HGNC Symbol;Acc:HGNC:24042]	1.28826
PDE3B	phosphodiesterase 3B [Source:HGNC Symbol;Acc:HGNC:8779]	1.288
MTFP1	mitochondrial fission process 1 [Source:HGNC Symbol;Acc:HGNC:26945]	1.2868
PDE1B	phosphodiesterase 1B [Source:HGNC Symbol;Acc:HGNC:8775]	1.28571
SOCS1	suppressor of cytokine signaling 1 [Source:HGNC Symbol;Acc:HGNC:19383]	1.28438
INHBA	inhibin subunit beta A [Source:HGNC Symbol;Acc:HGNC:6066]	1.28411
TPMT	thiopurine S-methyltransferase [Source:HGNC Symbol;Acc:HGNC:12014]	1.2815
OASL2P	2'-5' oligoadenylate synthetase like 2, pseudogene [Source:HGNC Symbol;Acc:HGNC:53738]	1.27914
SECTM1	secreted and transmembrane 1 [Source:HGNC Symbol;Acc:HGNC:10707]	1.27842
BORCS5	BLOC-1 related complex subunit 5 [Source:HGNC Symbol;Acc:HGNC:17950]	1.27838
KDM7A	lysine demethylase 7A [Source:HGNC Symbol;Acc:HGNC:22224]	1.27797
DZANK1	double zinc ribbon and ankyrin repeat domains 1 [Source:HGNC Symbol;Acc:HGNC:15858]	1.27637
RASGRP2	RAS guanyl releasing protein 2 [Source:HGNC Symbol;Acc:HGNC:9879]	1.27487
EIF2B2	eukaryotic translation initiation factor 2B subunit beta [Source:HGNC Symbol;Acc:HGNC:3258]	1.27472
IL27	interleukin 27 [Source:HGNC Symbol;Acc:HGNC:19157]	1.27253
BFSP1	beaded filament structural protein 1 [Source:HGNC Symbol;Acc:HGNC:1040]	1.2715
GATA3	GATA binding protein 3 [Source:HGNC Symbol;Acc:HGNC:4172]	1.27033
GPR85	G protein-coupled receptor 85 [Source:HGNC Symbol;Acc:HGNC:4536]	1.27016
NYNRIN	NYN domain and retroviral integrase containing [Source:HGNC Symbol;Acc:HGNC:20165]	1.26446
NIBAN1	niban apoptosis regulator 1 [Source:HGNC Symbol;Acc:HGNC:16784]	1.26313
FAM167B	family with sequence similarity 167 member B [Source:HGNC Symbol;Acc:HGNC:28133]	1.26271
TIGD3	tigger transposable element derived 3 [Source:HGNC Symbol;Acc:HGNC:18334]	1.26214
ST3GAL5	ST3 beta-galactoside alpha-2,3-sialyltransferase 5 [Source:HGNC Symbol;Acc:HGNC:10872]	1.26195
PHF11	PHD finger protein 11 [Source:HGNC Symbol;Acc:HGNC:17024]	1.26168
LTBP2	latent transforming growth factor beta binding protein 2 [Source:HGNC Symbol;Acc:HGNC:6715]	1.26116
C16orf96	chromosome 16 open reading frame 96 [Source:HGNC Symbol;Acc:HGNC:40031]	1.26093
TREX1	three prime repair exonuclease 1 [Source:HGNC Symbol;Acc:HGNC:12269]	1.26041
CD52	CD52 molecule [Source:HGNC Symbol;Acc:HGNC:1804]	1.26027
PLCB1	phospholipase C beta 1 [Source:HGNC Symbol;Acc:HGNC:15917]	1.25806
ELAPOR1	endosome-lysosome associated apoptosis and autophagy regulator 1 [Source:HGNC Symbol;Acc:HGNC:29618]	1.2536
GIMAP8	GTPase, IMAP family member 8 [Source:HGNC Symbol;Acc:HGNC:21792]	1.2536
MRNIP	MRN complex interacting protein [Source:HGNC Symbol;Acc:HGNC:30817]	1.2533
AXDND1	axonemal dynein light chain domain containing 1 [Source:HGNC Symbol;Acc:HGNC:26564]	1.25
CBARP	CACN subunit beta associated regulatory protein [Source:HGNC Symbol;Acc:HGNC:28617]	1.24874
ZC2HC1C	zinc finger C2HC-type containing 1C [Source:HGNC Symbol;Acc:HGNC:20354]	1.24794
STAT2	signal transducer and activator of transcription 2 [Source:HGNC Symbol;Acc:HGNC:11363]	1.24771
JUND	JunD proto-oncogene, AP-1 transcription factor subunit [Source:HGNC Symbol;Acc:HGNC:6206]	1.24756
SCRN2	secernin 2 [Source:HGNC Symbol;Acc:HGNC:30381]	1.24746
TAP2	transporter 2, ATP binding cassette subfamily B member [Source:HGNC Symbol;Acc:HGNC:44]	1.24404
SELPLG	selectin P ligand [Source:HGNC Symbol;Acc:HGNC:10722]	1.24198
CXCL3	C-X-C motif chemokine ligand 3 [Source:HGNC Symbol;Acc:HGNC:4604]	1.24196
RNF217	ring finger protein 217 [Source:HGNC Symbol;Acc:HGNC:21487]	1.24135
ELMO3	engulfment and cell motility 3 [Source:HGNC Symbol;Acc:HGNC:17289]	1.2413
ATP8B2	ATPase phospholipid transporting 8B2 [Source:HGNC Symbol;Acc:HGNC:13534]	1.24123
RTL9	retrotransposon Gag like 9 [Source:HGNC Symbol;Acc:HGNC:29245]	1.23897
NPHP4	nephrocystin 4 [Source:HGNC Symbol;Acc:HGNC:19104]	1.23794
XBP1	X-box binding protein 1 [Source:HGNC Symbol;Acc:HGNC:12801]	1.23741
DNAH2	dynein axonemal heavy chain 2 [Source:HGNC Symbol;Acc:HGNC:2948]	1.23711
ANKRD63	ankyrin repeat domain 63 [Source:HGNC Symbol;Acc:HGNC:40027]	1.23595
HRC	histidine rich calcium binding protein [Source:HGNC Symbol;Acc:HGNC:5178]	1.23595
PCDH1	protocadherin 1 [Source:HGNC Symbol;Acc:HGNC:8655]	1.23585
PPDPF	pancreatic progenitor cell differentiation and proliferation factor [Source:HGNC Symbol;Acc:HGNC:16142]	1.23466
DHX58	DExH-box helicase 58 [Source:HGNC Symbol;Acc:HGNC:29517]	1.23461
LRRC8B	leucine rich repeat containing 8 VRAC subunit B [Source:HGNC Symbol;Acc:HGNC:30692]	1.23413
SPTBN5	spectrin beta, non-erythrocytic 5 [Source:HGNC Symbol;Acc:HGNC:15680]	1.23402
PLEKHH2	pleckstrin homology, MyTH4 and FERM domain containing H2 [Source:HGNC Symbol;Acc:HGNC:30506]	1.23318
TBL2	transducin beta like 2 [Source:HGNC Symbol;Acc:HGNC:11586]	1.23289
RAB44	RAB44, member RAS oncogene family [Source:HGNC Symbol;Acc:HGNC:21068]	1.23158
OMG	oligodendrocyte myelin glycoprotein [Source:HGNC Symbol;Acc:HGNC:8135]	1.23116
CDH23	cadherin related 23 [Source:HGNC Symbol;Acc:HGNC:13733]	1.23077
MACROH2A1	macroH2A.1 histone [Source:HGNC Symbol;Acc:HGNC:4740]	1.23033
PDK3	pyruvate dehydrogenase kinase 3 [Source:HGNC Symbol;Acc:HGNC:8811]	1.22966
NEXN	nexilin F-actin binding protein [Source:HGNC Symbol;Acc:HGNC:29557]	1.22927
SBNO2	strawberry notch homolog 2 [Source:HGNC Symbol;Acc:HGNC:29158]	1.2274
RRAS	RAS related [Source:HGNC Symbol;Acc:HGNC:10447]	1.22602
DIPK1B	divergent protein kinase domain 1B [Source:HGNC Symbol;Acc:HGNC:28290]	1.22586
WNK2	WNK lysine deficient protein kinase 2 [Source:HGNC Symbol;Acc:HGNC:14542]	1.22547
FAM20A	FAM20A golgi associated secretory pathway pseudokinase [Source:HGNC Symbol;Acc:HGNC:23015]	1.2247
LRP6	LDL receptor related protein 6 [Source:HGNC Symbol;Acc:HGNC:6698]	1.22457
RGCC	regulator of cell cycle [Source:HGNC Symbol;Acc:HGNC:20369]	1.2239
PTGER2	prostaglandin E receptor 2 [Source:HGNC Symbol;Acc:HGNC:9594]	1.22362
UNC13A	unc-13 homolog A [Source:HGNC Symbol;Acc:HGNC:23150]	1.22357
MIDN	midnolin [Source:HGNC Symbol;Acc:HGNC:16298]	1.22274
IFNGR1	interferon gamma receptor 1 [Source:HGNC Symbol;Acc:HGNC:5439]	1.22132
AGTRAP	angiotensin II receptor associated protein [Source:HGNC Symbol;Acc:HGNC:13539]	1.22045
LRRC25	leucine rich repeat containing 25 [Source:HGNC Symbol;Acc:HGNC:29806]	1.21836
APOC4	apolipoprotein C4 [Source:HGNC Symbol;Acc:HGNC:611]	1.21778
TMEM268	transmembrane protein 268 [Source:HGNC Symbol;Acc:HGNC:24513]	1.21692
WDR54	WD repeat domain 54 [Source:HGNC Symbol;Acc:HGNC:25770]	1.21669
CRYGN	crystallin gamma N [Source:HGNC Symbol;Acc:HGNC:20458]	1.21627
ZNF781	zinc finger protein 781 [Source:HGNC Symbol;Acc:HGNC:26745]	1.21508
EPM2A	EPM2A glucan phosphatase, laforin [Source:HGNC Symbol;Acc:HGNC:3413]	1.21449
PLD1	phospholipase D1 [Source:HGNC Symbol;Acc:HGNC:9067]	1.21422
SGCE	sarcoglycan epsilon [Source:HGNC Symbol;Acc:HGNC:10808]	1.21261
CCND3	cyclin D3 [Source:HGNC Symbol;Acc:HGNC:1585]	1.21168
SEMA4C	semaphorin 4C [Source:HGNC Symbol;Acc:HGNC:10731]	1.21042
MINDY4	MINDY lysine 48 deubiquitinase 4 [Source:HGNC Symbol;Acc:HGNC:21916]	1.209
PLOD2	procollagen-lysine,2-oxoglutarate 5-dioxygenase 2 [Source:HGNC Symbol;Acc:HGNC:9082]	1.20853
MYORG	myogenesis regulating glycosidase (putative) [Source:HGNC Symbol;Acc:HGNC:19918]	1.20482
ANKMY1	ankyrin repeat and MYND domain containing 1 [Source:HGNC Symbol;Acc:HGNC:20987]	1.20279
VSIG4	V-set and immunoglobulin domain containing 4 [Source:HGNC Symbol;Acc:HGNC:17032]	1.20236
NME4	NME/NM23 nucleoside diphosphate kinase 4 [Source:HGNC Symbol;Acc:HGNC:7852]	1.20212
DOK2	docking protein 2 [Source:HGNC Symbol;Acc:HGNC:2991]	1.20199
NARS2	asparaginyl-tRNA synthetase 2, mitochondrial [Source:HGNC Symbol;Acc:HGNC:26274]	1.19976
SAMSN1	SAM domain, SH3 domain and nuclear localization signals 1 [Source:HGNC Symbol;Acc:HGNC:10528]	1.19893
VASH1	vasohibin 1 [Source:HGNC Symbol;Acc:HGNC:19964]	1.19758
ARG2	arginase 2 [Source:HGNC Symbol;Acc:HGNC:664]	1.196
B4GALT4	beta-1,4-galactosyltransferase 4 [Source:HGNC Symbol;Acc:HGNC:927]	1.196
SLC7A2	solute carrier family 7 member 2 [Source:HGNC Symbol;Acc:HGNC:11060]	1.195
CLEC1A	C-type lectin domain family 1 member A [Source:HGNC Symbol;Acc:HGNC:24355]	1.19231
CD300LF	CD300 molecule like family member f [Source:HGNC Symbol;Acc:HGNC:29883]	1.19048
KLF13	Kruppel like factor 13 [Source:HGNC Symbol;Acc:HGNC:13672]	1.19006
ITPKA	inositol-trisphosphate 3-kinase A [Source:HGNC Symbol;Acc:HGNC:6178]	1.18788
HDAC9	histone deacetylase 9 [Source:HGNC Symbol;Acc:HGNC:14065]	1.18672
MUC1	mucin 1, cell surface associated [Source:HGNC Symbol;Acc:HGNC:7508]	1.18656
PRAF2	PRA1 domain family member 2 [Source:HGNC Symbol;Acc:HGNC:28911]	1.18631
KIF1A	kinesin family member 1A [Source:HGNC Symbol;Acc:HGNC:888]	1.18436
PLAAT3	phospholipase A and acyltransferase 3 [Source:HGNC Symbol;Acc:HGNC:17825]	1.18362
DTX1	deltex E3 ubiquitin ligase 1 [Source:HGNC Symbol;Acc:HGNC:3060]	1.1817
SVIL	supervillin [Source:HGNC Symbol;Acc:HGNC:11480]	1.18039
HIPK4	homeodomain interacting protein kinase 4 [Source:HGNC Symbol;Acc:HGNC:19007]	1.18006
PPFIA4	PTPRF interacting protein alpha 4 [Source:HGNC Symbol;Acc:HGNC:9248]	1.17908
KLHL23	kelch like family member 23 [Source:HGNC Symbol;Acc:HGNC:27506]	1.17743
CDSN	corneodesmosin [Source:HGNC Symbol;Acc:HGNC:1802]	1.17729
FAHD2A	fumarylacetoacetate hydrolase domain containing 2A [Source:HGNC Symbol;Acc:HGNC:24252]	1.17642
PMM1	phosphomannomutase 1 [Source:HGNC Symbol;Acc:HGNC:9114]	1.17363
P4HA1	prolyl 4-hydroxylase subunit alpha 1 [Source:HGNC Symbol;Acc:HGNC:8546]	1.17362
TMEM9	transmembrane protein 9 [Source:HGNC Symbol;Acc:HGNC:18823]	1.1733
NAA10	N-alpha-acetyltransferase 10, NatA catalytic subunit [Source:HGNC Symbol;Acc:HGNC:18704]	1.17317
SULT2B1	sulfotransferase family 2B member 1 [Source:HGNC Symbol;Acc:HGNC:11459]	1.17268
MS4A4A	membrane spanning 4-domains A4A [Source:HGNC Symbol;Acc:HGNC:13371]	1.17225
SGMS2	sphingomyelin synthase 2 [Source:HGNC Symbol;Acc:HGNC:28395]	1.17197
PIK3R3	phosphoinositide-3-kinase regulatory subunit 3 [Source:HGNC Symbol;Acc:HGNC:8981]	1.17143
NEDD9	neural precursor cell expressed, developmentally down-regulated 9 [Source:HGNC Symbol;Acc:HGNC:7733]	1.17095
NLRC5	NLR family CARD domain containing 5 [Source:HGNC Symbol;Acc:HGNC:29933]	1.17079
ETV1	ETS variant transcription factor 1 [Source:HGNC Symbol;Acc:HGNC:3490]	1.16762
PPP1R3C	protein phosphatase 1 regulatory subunit 3C [Source:HGNC Symbol;Acc:HGNC:9293]	1.16503
C1orf116	chromosome 1 open reading frame 116 [Source:HGNC Symbol;Acc:HGNC:28667]	1.16469
MYL6B	myosin light chain 6B [Source:HGNC Symbol;Acc:HGNC:29823]	1.16453
SAMD11	sterile alpha motif domain containing 11 [Source:HGNC Symbol;Acc:HGNC:28706]	1.16162
DAAM2	dishevelled associated activator of morphogenesis 2 [Source:HGNC Symbol;Acc:HGNC:18143]	1.16162
ZNF608	zinc finger protein 608 [Source:HGNC Symbol;Acc:HGNC:29238]	1.16102
ARHGAP29	Rho GTPase activating protein 29 [Source:HGNC Symbol;Acc:HGNC:30207]	1.15983
GHR	growth hormone receptor [Source:HGNC Symbol;Acc:HGNC:4263]	1.15897
CSRNP1	cysteine and serine rich nuclear protein 1 [Source:HGNC Symbol;Acc:HGNC:14300]	1.15843
GSTO2	glutathione S-transferase omega 2 [Source:HGNC Symbol;Acc:HGNC:23064]	1.15761
GPR179	G protein-coupled receptor 179 [Source:HGNC Symbol;Acc:HGNC:31371]	1.1547
AOC3	amine oxidase copper containing 3 [Source:HGNC Symbol;Acc:HGNC:550]	1.1547
MMRN2	multimerin 2 [Source:HGNC Symbol;Acc:HGNC:19888]	1.1547
FLNC	filamin C [Source:HGNC Symbol;Acc:HGNC:3756]	1.1547
NOTCH3	notch receptor 3 [Source:HGNC Symbol;Acc:HGNC:7883]	1.1547
KCNH7	potassium voltage-gated channel subfamily H member 7 [Source:HGNC Symbol;Acc:HGNC:18863]	1.1547
NFATC4	nuclear factor of activated T cells 4 [Source:HGNC Symbol;Acc:HGNC:7778]	1.15393
GPR141BP	G protein-coupled receptor 141B, pseudogene [Source:HGNC Symbol;Acc:HGNC:53813]	1.15385
CYTIP	cytohesin 1 interacting protein [Source:HGNC Symbol;Acc:HGNC:9506]	1.15364
C5AR2	complement component 5a receptor 2 [Source:HGNC Symbol;Acc:HGNC:4527]	1.15332
SIAH2	siah E3 ubiquitin protein ligase 2 [Source:HGNC Symbol;Acc:HGNC:10858]	1.15304
CCDC38	coiled-coil domain containing 38 [Source:HGNC Symbol;Acc:HGNC:26843]	1.15261
IL18	interleukin 18 [Source:HGNC Symbol;Acc:HGNC:5986]	1.15174
EPSTI1	epithelial stromal interaction 1 [Source:HGNC Symbol;Acc:HGNC:16465]	1.15173
ABHD18	abhydrolase domain containing 18 [Source:HGNC Symbol;Acc:HGNC:26111]	1.15055
PORCN	porcupine O-acyltransferase [Source:HGNC Symbol;Acc:HGNC:17652]	1.15
LAMA5	laminin subunit alpha 5 [Source:HGNC Symbol;Acc:HGNC:6485]	1.14938
MOB3B	MOB kinase activator 3B [Source:HGNC Symbol;Acc:HGNC:23825]	1.14872
CREG2	cellular repressor of E1A stimulated genes 2 [Source:HGNC Symbol;Acc:HGNC:14272]	1.14806
CEP19	centrosomal protein 19 [Source:HGNC Symbol;Acc:HGNC:28209]	1.14721
CERCAM	cerebral endothelial cell adhesion molecule [Source:HGNC Symbol;Acc:HGNC:23723]	1.14629
TRPM2	transient receptor potential cation channel subfamily M member 2 [Source:HGNC Symbol;Acc:HGNC:12339]	1.14611
TIAM1	TIAM Rac1 associated GEF 1 [Source:HGNC Symbol;Acc:HGNC:11805]	1.14589
CCDC106	coiled-coil domain containing 106 [Source:HGNC Symbol;Acc:HGNC:30181]	1.14561
HDHD3	haloacid dehalogenase like hydrolase domain containing 3 [Source:HGNC Symbol;Acc:HGNC:28171]	1.1454
FAM131A	family with sequence similarity 131 member A [Source:HGNC Symbol;Acc:HGNC:28308]	1.1448
TMOD4	tropomodulin 4 [Source:HGNC Symbol;Acc:HGNC:11874]	1.14479
ACVRL1	activin A receptor like type 1 [Source:HGNC Symbol;Acc:HGNC:175]	1.14417
EID1	EP300 interacting inhibitor of differentiation 1 [Source:HGNC Symbol;Acc:HGNC:1191]	1.14251
DDX60	DExD/H-box helicase 60 [Source:HGNC Symbol;Acc:HGNC:25942]	1.14182
TMEM107	transmembrane protein 107 [Source:HGNC Symbol;Acc:HGNC:28128]	1.14181
RCVRN	recoverin [Source:HGNC Symbol;Acc:HGNC:9937]	1.14164
CSRP2	cysteine and glycine rich protein 2 [Source:HGNC Symbol;Acc:HGNC:2470]	1.14125
NTPCR	nucleoside-triphosphatase, cancer-related [Source:HGNC Symbol;Acc:HGNC:28204]	1.14077
FCGR2B	Fc fragment of IgG receptor IIb [Source:HGNC Symbol;Acc:HGNC:3618]	1.14068
SPINT2	serine peptidase inhibitor, Kunitz type 2 [Source:HGNC Symbol;Acc:HGNC:11247]	1.14051
VAMP5	vesicle associated membrane protein 5 [Source:HGNC Symbol;Acc:HGNC:12646]	1.1403
TNFAIP6	TNF alpha induced protein 6 [Source:HGNC Symbol;Acc:HGNC:11898]	1.14022
ADM	adrenomedullin [Source:HGNC Symbol;Acc:HGNC:259]	1.13902
RAB42	RAB42, member RAS oncogene family [Source:HGNC Symbol;Acc:HGNC:28702]	1.13843
HID1	HID1 domain containing [Source:HGNC Symbol;Acc:HGNC:15736]	1.13771
FBXO44	F-box protein 44 [Source:HGNC Symbol;Acc:HGNC:24847]	1.13683
TXLNB	taxilin beta [Source:HGNC Symbol;Acc:HGNC:21617]	1.13636
CAPN8	calpain 8 [Source:HGNC Symbol;Acc:HGNC:1485]	1.13594
MXI1	MAX interactor 1, dimerization protein [Source:HGNC Symbol;Acc:HGNC:7534]	1.13275
CYSLTR2	cysteinyl leukotriene receptor 2 [Source:HGNC Symbol;Acc:HGNC:18274]	1.13274
PRSS23	serine protease 23 [Source:HGNC Symbol;Acc:HGNC:14370]	1.13214
C2orf50	chromosome 2 open reading frame 50 [Source:HGNC Symbol;Acc:HGNC:26324]	1.13185
CCDC126	coiled-coil domain containing 126 [Source:HGNC Symbol;Acc:HGNC:22398]	1.1318
POLN	DNA polymerase nu [Source:HGNC Symbol;Acc:HGNC:18870]	1.13007
TSHZ3	teashirt zinc finger homeobox 3 [Source:HGNC Symbol;Acc:HGNC:30700]	1.12824
ADSS1	adenylosuccinate synthase 1 [Source:HGNC Symbol;Acc:HGNC:20093]	1.12799
SLC7A1	solute carrier family 7 member 1 [Source:HGNC Symbol;Acc:HGNC:11057]	1.12772
TREML4	triggering receptor expressed on myeloid cells like 4 [Source:HGNC Symbol;Acc:HGNC:30807]	1.12755
MAP4K1	mitogen-activated protein kinase kinase kinase kinase 1 [Source:HGNC Symbol;Acc:HGNC:6863]	1.12648
COL4A2	collagen type IV alpha 2 chain [Source:HGNC Symbol;Acc:HGNC:2203]	1.12624
C3	complement C3 [Source:HGNC Symbol;Acc:HGNC:1318]	1.12565
DNAI2	dynein axonemal intermediate chain 2 [Source:HGNC Symbol;Acc:HGNC:18744]	1.12489
ZNF580	zinc finger protein 580 [Source:HGNC Symbol;Acc:HGNC:29473]	1.12445
TNFRSF10A	TNF receptor superfamily member 10a [Source:HGNC Symbol;Acc:HGNC:11904]	1.12378
RCBTB2	RCC1 and BTB domain containing protein 2 [Source:HGNC Symbol;Acc:HGNC:1914]	1.12361
CCDC159	coiled-coil domain containing 159 [Source:HGNC Symbol;Acc:HGNC:26996]	1.12352
LOXL3	lysyl oxidase like 3 [Source:HGNC Symbol;Acc:HGNC:13869]	1.12303
NDRG2	NDRG family member 2 [Source:HGNC Symbol;Acc:HGNC:14460]	1.12165
PRRT1	proline rich transmembrane protein 1 [Source:HGNC Symbol;Acc:HGNC:13943]	1.1215
CFAP43	cilia and flagella associated protein 43 [Source:HGNC Symbol;Acc:HGNC:26684]	1.12027
MSH5	mutS homolog 5 [Source:HGNC Symbol;Acc:HGNC:7328]	1.11973
GRK6	G protein-coupled receptor kinase 6 [Source:HGNC Symbol;Acc:HGNC:4545]	1.11951
DCLK3	doublecortin like kinase 3 [Source:HGNC Symbol;Acc:HGNC:19005]	1.11847
SKOR1	SKI family transcriptional corepressor 1 [Source:HGNC Symbol;Acc:HGNC:21326]	1.11847
GOLM2	golgi membrane protein 2 [Source:HGNC Symbol;Acc:HGNC:24892]	1.11817
HAL	histidine ammonia-lyase [Source:HGNC Symbol;Acc:HGNC:4806]	1.11679
ACSF2	acyl-CoA synthetase family member 2 [Source:HGNC Symbol;Acc:HGNC:26101]	1.11648
HEMK1	HemK methyltransferase family member 1 [Source:HGNC Symbol;Acc:HGNC:24923]	1.11533
PDE7B	phosphodiesterase 7B [Source:HGNC Symbol;Acc:HGNC:8792]	1.11462
WBP1	WW domain binding protein 1 [Source:HGNC Symbol;Acc:HGNC:12737]	1.11376
CROCC	ciliary rootlet coiled-coil, rootletin [Source:HGNC Symbol;Acc:HGNC:21299]	1.11349
KIAA0040	KIAA0040 [Source:HGNC Symbol;Acc:HGNC:28950]	1.11131
KLF1	Kruppel like factor 1 [Source:HGNC Symbol;Acc:HGNC:6345]	1.11078
THUMPD3-AS1	THUMPD3 antisense RNA 1 [Source:HGNC Symbol;Acc:HGNC:44478]	1.1103
MIF	macrophage migration inhibitory factor [Source:HGNC Symbol;Acc:HGNC:7097]	1.10877
SORCS2	sortilin related VPS10 domain containing receptor 2 [Source:HGNC Symbol;Acc:HGNC:16698]	1.10854
PLAT	plasminogen activator, tissue type [Source:HGNC Symbol;Acc:HGNC:9051]	1.10828
XPR1	xenotropic and polytropic retrovirus receptor 1 [Source:HGNC Symbol;Acc:HGNC:12827]	1.10762
TFB1M	transcription factor B1, mitochondrial [Source:HGNC Symbol;Acc:HGNC:17037]	1.10725
TSPAN8	tetraspanin 8 [Source:HGNC Symbol;Acc:HGNC:11855]	1.10591
AIFM2	apoptosis inducing factor mitochondria associated 2 [Source:HGNC Symbol;Acc:HGNC:21411]	1.10359
S100A11	S100 calcium binding protein A11 [Source:HGNC Symbol;Acc:HGNC:10488]	1.10342
ECSCR	endothelial cell surface expressed chemotaxis and apoptosis regulator [Source:HGNC Symbol;Acc:HGNC:35454]	1.10341
PTPDC1	protein tyrosine phosphatase domain containing 1 [Source:HGNC Symbol;Acc:HGNC:30184]	1.10294
FIGNL2	fidgetin like 2 [Source:HGNC Symbol;Acc:HGNC:13287]	1.10294
PCGF2	polycomb group ring finger 2 [Source:HGNC Symbol;Acc:HGNC:12929]	1.10028
EZR	ezrin [Source:HGNC Symbol;Acc:HGNC:12691]	1.09967
CP	ceruloplasmin [Source:HGNC Symbol;Acc:HGNC:2295]	1.09951
ZNF609	zinc finger protein 609 [Source:HGNC Symbol;Acc:HGNC:29003]	1.09727
ARMCX4	armadillo repeat containing X-linked 4 [Source:HGNC Symbol;Acc:HGNC:28615]	1.09717
AKAP3	A-kinase anchoring protein 3 [Source:HGNC Symbol;Acc:HGNC:373]	1.09711
PRXL2B	peroxiredoxin like 2B [Source:HGNC Symbol;Acc:HGNC:28390]	1.09707
CFAP126	cilia and flagella associated protein 126 [Source:HGNC Symbol;Acc:HGNC:32325]	1.09413
SLC25A23	solute carrier family 25 member 23 [Source:HGNC Symbol;Acc:HGNC:19375]	1.09358
LY86	lymphocyte antigen 86 [Source:HGNC Symbol;Acc:HGNC:16837]	1.09358
SOD2	superoxide dismutase 2 [Source:HGNC Symbol;Acc:HGNC:11180]	1.093
NLRX1	NLR family member X1 [Source:HGNC Symbol;Acc:HGNC:29890]	1.09292
NHSL2	NHS like 2 [Source:HGNC Symbol;Acc:HGNC:33737]	1.09206
VASN	vasorin [Source:HGNC Symbol;Acc:HGNC:18517]	1.08771
CERS3	ceramide synthase 3 [Source:HGNC Symbol;Acc:HGNC:23752]	1.08736
MX1	MX dynamin like GTPase 1 [Source:HGNC Symbol;Acc:HGNC:7532]	1.08719
C20orf173	chromosome 20 open reading frame 173 [Source:HGNC Symbol;Acc:HGNC:16166]	1.08716
LMNTD2	lamin tail domain containing 2 [Source:HGNC Symbol;Acc:HGNC:28561]	1.08609
GAMT	guanidinoacetate N-methyltransferase [Source:HGNC Symbol;Acc:HGNC:4136]	1.08531
DDR1	discoidin domain receptor tyrosine kinase 1 [Source:HGNC Symbol;Acc:HGNC:2730]	1.08349
MPIG6B	megakaryocyte and platelet inhibitory receptor G6b [Source:HGNC Symbol;Acc:HGNC:13937]	1.0829
DYNC2H1	dynein cytoplasmic 2 heavy chain 1 [Source:HGNC Symbol;Acc:HGNC:2962]	1.0828
LILRA5	leukocyte immunoglobulin like receptor A5 [Source:HGNC Symbol;Acc:HGNC:16309]	1.0821
CCDC158	coiled-coil domain containing 158 [Source:HGNC Symbol;Acc:HGNC:26374]	1.08068
FAM187B	family with sequence similarity 187 member B [Source:HGNC Symbol;Acc:HGNC:26366]	1.08029
ATF7IP	activating transcription factor 7 interacting protein [Source:HGNC Symbol;Acc:HGNC:20092]	1.08003
SEMA6B	semaphorin 6B [Source:HGNC Symbol;Acc:HGNC:10739]	1.07991
SNX18	sorting nexin 18 [Source:HGNC Symbol;Acc:HGNC:19245]	1.07909
CDC6	cell division cycle 6 [Source:HGNC Symbol;Acc:HGNC:1744]	1.07792
LENEP	lens epithelial protein [Source:HGNC Symbol;Acc:HGNC:14429]	1.0763
DPEP2	dipeptidase 2 [Source:HGNC Symbol;Acc:HGNC:23028]	1.07575
MARCHF9	membrane associated ring-CH-type finger 9 [Source:HGNC Symbol;Acc:HGNC:25139]	1.07521
TMEM156	transmembrane protein 156 [Source:HGNC Symbol;Acc:HGNC:26260]	1.07334
PFKP	phosphofructokinase, platelet [Source:HGNC Symbol;Acc:HGNC:8878]	1.07279
AMIGO2	adhesion molecule with Ig like domain 2 [Source:HGNC Symbol;Acc:HGNC:24073]	1.07037
MYOZ1	myozenin 1 [Source:HGNC Symbol;Acc:HGNC:13752]	1.0697
HDDC2	HD domain containing 2 [Source:HGNC Symbol;Acc:HGNC:21078]	1.06721
PIGZ	phosphatidylinositol glycan anchor biosynthesis class Z [Source:HGNC Symbol;Acc:HGNC:30596]	1.06673
BCAS1	brain enriched myelin associated protein 1 [Source:HGNC Symbol;Acc:HGNC:974]	1.06503
PEX11A	peroxisomal biogenesis factor 11 alpha [Source:HGNC Symbol;Acc:HGNC:8852]	1.06316
PAPSS2	3'-phosphoadenosine 5'-phosphosulfate synthase 2 [Source:HGNC Symbol;Acc:HGNC:8604]	1.06295
C4orf19	chromosome 4 open reading frame 19 [Source:HGNC Symbol;Acc:HGNC:25618]	1.06079
CTH	cystathionine gamma-lyase [Source:HGNC Symbol;Acc:HGNC:2501]	1.06049
PRPF40B	pre-mRNA processing factor 40 homolog B [Source:HGNC Symbol;Acc:HGNC:25031]	1.06041
BRME1	break repair meiotic recombinase recruitment factor 1 [Source:HGNC Symbol;Acc:HGNC:28153]	1.06024
HLA-DMB	major histocompatibility complex, class II, DM beta [Source:HGNC Symbol;Acc:HGNC:4935]	1.05944
CD44	CD44 molecule (Indian blood group) [Source:HGNC Symbol;Acc:HGNC:1681]	1.05824
TRAF4	TNF receptor associated factor 4 [Source:HGNC Symbol;Acc:HGNC:12034]	1.05809
PLA2G7	phospholipase A2 group VII [Source:HGNC Symbol;Acc:HGNC:9040]	1.05761
TIMP3	TIMP metallopeptidase inhibitor 3 [Source:HGNC Symbol;Acc:HGNC:11822]	1.05748
EID2B	EP300 interacting inhibitor of differentiation 2B [Source:HGNC Symbol;Acc:HGNC:26796]	1.05663
ESYT3	extended synaptotagmin 3 [Source:HGNC Symbol;Acc:HGNC:24295]	1.05662
ZNF516	zinc finger protein 516 [Source:HGNC Symbol;Acc:HGNC:28990]	1.05292
FBXO40	F-box protein 40 [Source:HGNC Symbol;Acc:HGNC:29816]	1.05254
IFT80	intraflagellar transport 80 [Source:HGNC Symbol;Acc:HGNC:29262]	1.05183
LRRK2	leucine rich repeat kinase 2 [Source:HGNC Symbol;Acc:HGNC:18618]	1.05146
RHBDL3	rhomboid like 3 [Source:HGNC Symbol;Acc:HGNC:16502]	1.05069
NIT1	nitrilase 1 [Source:HGNC Symbol;Acc:HGNC:7828]	1.05044
RIN3	Ras and Rab interactor 3 [Source:HGNC Symbol;Acc:HGNC:18751]	1.04805
VANGL2	VANGL planar cell polarity protein 2 [Source:HGNC Symbol;Acc:HGNC:15511]	1.04766
AKAP13	A-kinase anchoring protein 13 [Source:HGNC Symbol;Acc:HGNC:371]	1.04509
PSMB9	proteasome 20S subunit beta 9 [Source:HGNC Symbol;Acc:HGNC:9546]	1.04441
CTSV	cathepsin V [Source:HGNC Symbol;Acc:HGNC:2538]	1.04408
TNFSF4	TNF superfamily member 4 [Source:HGNC Symbol;Acc:HGNC:11934]	1.043
HSPBAP1	HSPB1 associated protein 1 [Source:HGNC Symbol;Acc:HGNC:16389]	1.04187
PIK3CD	phosphatidylinositol-4,5-bisphosphate 3-kinase catalytic subunit delta [Source:HGNC Symbol;Acc:HGNC:8977]	1.04176
KIAA1671	KIAA1671 [Source:HGNC Symbol;Acc:HGNC:29345]	1.03989
STIMATE	STIM activating enhancer [Source:HGNC Symbol;Acc:HGNC:30526]	1.03955
TRPM3	transient receptor potential cation channel subfamily M member 3 [Source:HGNC Symbol;Acc:HGNC:17992]	1.03948
SH3BP4	SH3 domain binding protein 4 [Source:HGNC Symbol;Acc:HGNC:10826]	1.03905
CD27	CD27 molecule [Source:HGNC Symbol;Acc:HGNC:11922]	1.03687
SP140	SP140 nuclear body protein [Source:HGNC Symbol;Acc:HGNC:17133]	1.03663
GPT	glutamic--pyruvic transaminase [Source:HGNC Symbol;Acc:HGNC:4552]	1.03552
ARHGAP44	Rho GTPase activating protein 44 [Source:HGNC Symbol;Acc:HGNC:29096]	1.0342
RBM11	RNA binding motif protein 11 [Source:HGNC Symbol;Acc:HGNC:9897]	1.03404
KLF3	Kruppel like factor 3 [Source:HGNC Symbol;Acc:HGNC:16516]	1.03329
IFI44	interferon induced protein 44 [Source:HGNC Symbol;Acc:HGNC:16938]	1.03316
NSMAF	neutral sphingomyelinase activation associated factor [Source:HGNC Symbol;Acc:HGNC:8017]	1.03204
INCA1	inhibitor of CDK, cyclin A1 interacting protein 1 [Source:HGNC Symbol;Acc:HGNC:32224]	1.03105
SLC16A6	solute carrier family 16 member 6 [Source:HGNC Symbol;Acc:HGNC:10927]	1.03032
CRTC3	CREB regulated transcription coactivator 3 [Source:HGNC Symbol;Acc:HGNC:26148]	1.02905
GPRC5A	G protein-coupled receptor class C group 5 member A [Source:HGNC Symbol;Acc:HGNC:9836]	1.02753
PARP3	poly(ADP-ribose) polymerase family member 3 [Source:HGNC Symbol;Acc:HGNC:273]	1.02746
PCSK4	proprotein convertase subtilisin/kexin type 4 [Source:HGNC Symbol;Acc:HGNC:8746]	1.02631
PLEKHN1	pleckstrin homology domain containing N1 [Source:HGNC Symbol;Acc:HGNC:25284]	1.02446
WDR86	WD repeat domain 86 [Source:HGNC Symbol;Acc:HGNC:28020]	1.02307
ZSWIM4	zinc finger SWIM-type containing 4 [Source:HGNC Symbol;Acc:HGNC:25704]	1.02199
PCK2	phosphoenolpyruvate carboxykinase 2, mitochondrial [Source:HGNC Symbol;Acc:HGNC:8725]	1.02066
TLE6	TLE family member 6, subcortical maternal complex member [Source:HGNC Symbol;Acc:HGNC:30788]	1.02017
TEAD1	TEA domain transcription factor 1 [Source:HGNC Symbol;Acc:HGNC:11714]	1.01962
CREB3L1	cAMP responsive element binding protein 3 like 1 [Source:HGNC Symbol;Acc:HGNC:18856]	1.01932
ABHD11	abhydrolase domain containing 11 [Source:HGNC Symbol;Acc:HGNC:16407]	1.01851
EXTL1	exostosin like glycosyltransferase 1 [Source:HGNC Symbol;Acc:HGNC:3515]	1.01814
NOTCH1	notch receptor 1 [Source:HGNC Symbol;Acc:HGNC:7881]	1.01734
CTSH	cathepsin H [Source:HGNC Symbol;Acc:HGNC:2535]	1.01708
KDM4B	lysine demethylase 4B [Source:HGNC Symbol;Acc:HGNC:29136]	1.01707
KCND1	potassium voltage-gated channel subfamily D member 1 [Source:HGNC Symbol;Acc:HGNC:6237]	1.01697
FLYWCH1	FLYWCH-type zinc finger 1 [Source:HGNC Symbol;Acc:HGNC:25404]	1.01687
IFI16	interferon gamma inducible protein 16 [Source:HGNC Symbol;Acc:HGNC:5395]	1.01625
LCMT1	leucine carboxyl methyltransferase 1 [Source:HGNC Symbol;Acc:HGNC:17557]	1.01572
HILPDA	hypoxia inducible lipid droplet associated [Source:HGNC Symbol;Acc:HGNC:28859]	1.01354
GRAMD2B	GRAM domain containing 2B [Source:HGNC Symbol;Acc:HGNC:24911]	1.01249
SIGLEC6	sialic acid binding Ig like lectin 6 [Source:HGNC Symbol;Acc:HGNC:10875]	1.01232
PRR5L	proline rich 5 like [Source:HGNC Symbol;Acc:HGNC:25878]	1.01196
NIM1K	NIM1 serine/threonine protein kinase [Source:HGNC Symbol;Acc:HGNC:28646]	1.0119
RAB25	RAB25, member RAS oncogene family [Source:HGNC Symbol;Acc:HGNC:18238]	1.01182
BBS1	Bardet-Biedl syndrome 1 [Source:HGNC Symbol;Acc:HGNC:966]	1.01093
SLC39A14	solute carrier family 39 member 14 [Source:HGNC Symbol;Acc:HGNC:20858]	1.01079
LYNX1-SLURP2	LYNX1-SLURP2 readthrough [Source:HGNC Symbol;Acc:HGNC:52291]	1.00971
LAMB2	laminin subunit beta 2 [Source:HGNC Symbol;Acc:HGNC:6487]	1.00921
RAB23	RAB23, member RAS oncogene family [Source:HGNC Symbol;Acc:HGNC:14263]	1.00878
GRIK4	glutamate ionotropic receptor kainate type subunit 4 [Source:HGNC Symbol;Acc:HGNC:4582]	1.00862
ANKRD42	ankyrin repeat domain 42 [Source:HGNC Symbol;Acc:HGNC:26752]	1.00848
FLT3LG	fms related receptor tyrosine kinase 3 ligand [Source:HGNC Symbol;Acc:HGNC:3766]	1.00833
TRPM5	transient receptor potential cation channel subfamily M member 5 [Source:HGNC Symbol;Acc:HGNC:14323]	1.00801
TRPT1	tRNA phosphotransferase 1 [Source:HGNC Symbol;Acc:HGNC:20316]	1.00765
MPI	mannose phosphate isomerase [Source:HGNC Symbol;Acc:HGNC:7216]	1.00608
PTGES	prostaglandin E synthase [Source:HGNC Symbol;Acc:HGNC:9599]	1.00441
PARP16	poly(ADP-ribose) polymerase family member 16 [Source:HGNC Symbol;Acc:HGNC:26040]	1.00434
MTMR11	myotubularin related protein 11 [Source:HGNC Symbol;Acc:HGNC:24307]	1.00394
SMIM1	small integral membrane protein 1 (Vel blood group) [Source:HGNC Symbol;Acc:HGNC:44204]	1.00369
SNX2	sorting nexin 2 [Source:HGNC Symbol;Acc:HGNC:11173]	1.00248
TNNI3	troponin I3, cardiac type [Source:HGNC Symbol;Acc:HGNC:11947]	1.00242
PSRC1	proline and serine rich coiled-coil 1 [Source:HGNC Symbol;Acc:HGNC:24472]	1.00188
FCGRT	Fc fragment of IgG receptor and transporter [Source:HGNC Symbol;Acc:HGNC:3621]	1.00185
TTLL7	tubulin tyrosine ligase like 7 [Source:HGNC Symbol;Acc:HGNC:26242]	1
TERT	telomerase reverse transcriptase [Source:HGNC Symbol;Acc:HGNC:11730]	1
SLC41A1	solute carrier family 41 member 1 [Source:HGNC Symbol;Acc:HGNC:19429]	0.999439
LAMB3	laminin subunit beta 3 [Source:HGNC Symbol;Acc:HGNC:6490]	0.999101
LRRC66	leucine rich repeat containing 66 [Source:HGNC Symbol;Acc:HGNC:34299]	0.9991
SLC25A15	solute carrier family 25 member 15 [Source:HGNC Symbol;Acc:HGNC:10985]	0.997819
EHBP1	EH domain binding protein 1 [Source:HGNC Symbol;Acc:HGNC:29144]	0.997314
PNCK	pregnancy up-regulated nonubiquitous CaM kinase [Source:HGNC Symbol;Acc:HGNC:13415]	0.997241
BATF2	basic leucine zipper ATF-like transcription factor 2 [Source:HGNC Symbol;Acc:HGNC:25163]	0.99716
LAYN	layilin [Source:HGNC Symbol;Acc:HGNC:29471]	0.997083
CDHR3	cadherin related family member 3 [Source:HGNC Symbol;Acc:HGNC:26308]	0.995302
ATP5F1D	ATP synthase F1 subunit delta [Source:HGNC Symbol;Acc:HGNC:837]	0.994393
CNN1	calponin 1 [Source:HGNC Symbol;Acc:HGNC:2155]	0.994199
HAS1	hyaluronan synthase 1 [Source:HGNC Symbol;Acc:HGNC:4818]	0.994199
PDZD7	PDZ domain containing 7 [Source:HGNC Symbol;Acc:HGNC:26257]	0.993407
GPR180	G protein-coupled receptor 180 [Source:HGNC Symbol;Acc:HGNC:28899]	0.993026
BST2	bone marrow stromal cell antigen 2 [Source:HGNC Symbol;Acc:HGNC:1119]	0.99268
C11orf24	chromosome 11 open reading frame 24 [Source:HGNC Symbol;Acc:HGNC:1174]	0.99213
PTGFRN	prostaglandin F2 receptor inhibitor [Source:HGNC Symbol;Acc:HGNC:9601]	0.991577
IRF2BPL	interferon regulatory factor 2 binding protein like [Source:HGNC Symbol;Acc:HGNC:14282]	0.988187
ENG	endoglin [Source:HGNC Symbol;Acc:HGNC:3349]	0.98808
IRF4	interferon regulatory factor 4 [Source:HGNC Symbol;Acc:HGNC:6119]	0.986592
ACBD4	acyl-CoA binding domain containing 4 [Source:HGNC Symbol;Acc:HGNC:23337]	0.985595
NENF	neudesin neurotrophic factor [Source:HGNC Symbol;Acc:HGNC:30384]	0.985463
ERICH6	glutamate rich 6 [Source:HGNC Symbol;Acc:HGNC:28602]	0.984359
PML	PML nuclear body scaffold [Source:HGNC Symbol;Acc:HGNC:9113]	0.983534
PTP4A3	protein tyrosine phosphatase 4A3 [Source:HGNC Symbol;Acc:HGNC:9636]	0.983263
HECTD4	HECT domain E3 ubiquitin protein ligase 4 [Source:HGNC Symbol;Acc:HGNC:26611]	0.982585
IFITM2	interferon induced transmembrane protein 2 [Source:HGNC Symbol;Acc:HGNC:5413]	0.982046
AIG1	androgen induced 1 [Source:HGNC Symbol;Acc:HGNC:21607]	0.981093
HOPX	HOP homeobox [Source:HGNC Symbol;Acc:HGNC:24961]	0.980498
FRMD4A	FERM domain containing 4A [Source:HGNC Symbol;Acc:HGNC:25491]	0.979515
EDA2R	ectodysplasin A2 receptor [Source:HGNC Symbol;Acc:HGNC:17756]	0.979466
AKAP17A	A-kinase anchoring protein 17A [Source:HGNC Symbol;Acc:HGNC:18783]	0.978836
CD79A	CD79a molecule [Source:HGNC Symbol;Acc:HGNC:1698]	0.97867
SERPINB2	serpin family B member 2 [Source:HGNC Symbol;Acc:HGNC:8584]	0.978478
HIVEP3	HIVEP zinc finger 3 [Source:HGNC Symbol;Acc:HGNC:13561]	0.978183
PABPC1L	poly(A) binding protein cytoplasmic 1 like [Source:HGNC Symbol;Acc:HGNC:15797]	0.975842
ABCA7	ATP binding cassette subfamily A member 7 [Source:HGNC Symbol;Acc:HGNC:37]	0.975748
PADI3	peptidyl arginine deiminase 3 [Source:HGNC Symbol;Acc:HGNC:18337]	0.97561
KDR	kinase insert domain receptor [Source:HGNC Symbol;Acc:HGNC:6307]	0.975186
KHK	ketohexokinase [Source:HGNC Symbol;Acc:HGNC:6315]	0.975121
FBXO2	F-box protein 2 [Source:HGNC Symbol;Acc:HGNC:13581]	0.974281
JMJD7-PLA2G4B	JMJD7-PLA2G4B readthrough [Source:HGNC Symbol;Acc:HGNC:34449]	0.972872
MORN3	MORN repeat containing 3 [Source:HGNC Symbol;Acc:HGNC:29807]	0.970953
THEM4	thioesterase superfamily member 4 [Source:HGNC Symbol;Acc:HGNC:17947]	0.970443
BEX4	brain expressed X-linked 4 [Source:HGNC Symbol;Acc:HGNC:25475]	0.970149
AXL	AXL receptor tyrosine kinase [Source:HGNC Symbol;Acc:HGNC:905]	0.969792
RBM20	RNA binding motif protein 20 [Source:HGNC Symbol;Acc:HGNC:27424]	0.969631
RAB33A	RAB33A, member RAS oncogene family [Source:HGNC Symbol;Acc:HGNC:9773]	0.969578
COQ8A	coenzyme Q8A [Source:HGNC Symbol;Acc:HGNC:16812]	0.968742
C11orf49	chromosome 11 open reading frame 49 [Source:HGNC Symbol;Acc:HGNC:28720]	0.966787
CPED1	cadherin like and PC-esterase domain containing 1 [Source:HGNC Symbol;Acc:HGNC:26159]	0.966543
HSPB6	heat shock protein family B (small) member 6 [Source:HGNC Symbol;Acc:HGNC:26511]	0.965888
NUMBL	NUMB like endocytic adaptor protein [Source:HGNC Symbol;Acc:HGNC:8061]	0.965387
METRN	meteorin, glial cell differentiation regulator [Source:HGNC Symbol;Acc:HGNC:14151]	0.964412
ANK1	ankyrin 1 [Source:HGNC Symbol;Acc:HGNC:492]	0.963147
ASIC3	acid sensing ion channel subunit 3 [Source:HGNC Symbol;Acc:HGNC:101]	0.962737
PDLIM7	PDZ and LIM domain 7 [Source:HGNC Symbol;Acc:HGNC:22958]	0.962428
MT-TW	mitochondrially encoded tRNA-Trp (UGA/G) [Source:HGNC Symbol;Acc:HGNC:7501]	0.960878
HIGD1A	HIG1 hypoxia inducible domain family member 1A [Source:HGNC Symbol;Acc:HGNC:29527]	0.960421
C21orf91	chromosome 21 open reading frame 91 [Source:HGNC Symbol;Acc:HGNC:16459]	0.960371
PLEKHA7	pleckstrin homology domain containing A7 [Source:HGNC Symbol;Acc:HGNC:27049]	0.960313
HSPB11	heat shock protein family B (small) member 11 [Source:HGNC Symbol;Acc:HGNC:25019]	0.958761
TMEM91	transmembrane protein 91 [Source:HGNC Symbol;Acc:HGNC:32393]	0.958549
MIR22	microRNA 22 [Source:HGNC Symbol;Acc:HGNC:31599]	0.957895
CCL8	C-C motif chemokine ligand 8 [Source:HGNC Symbol;Acc:HGNC:10635]	0.957815
RETREG1	reticulophagy regulator 1 [Source:HGNC Symbol;Acc:HGNC:25964]	0.957156
ZNF239	zinc finger protein 239 [Source:HGNC Symbol;Acc:HGNC:13031]	0.956113
PCDHGA8	protocadherin gamma subfamily A, 8 [Source:HGNC Symbol;Acc:HGNC:8706]	0.955626
SSH2	slingshot protein phosphatase 2 [Source:HGNC Symbol;Acc:HGNC:30580]	0.955429
SIRT6	sirtuin 6 [Source:HGNC Symbol;Acc:HGNC:14934]	0.954352
AGER	advanced glycosylation end-product specific receptor [Source:HGNC Symbol;Acc:HGNC:320]	0.954286
STK26	serine/threonine kinase 26 [Source:HGNC Symbol;Acc:HGNC:18174]	0.953719
ARHGEF3	Rho guanine nucleotide exchange factor 3 [Source:HGNC Symbol;Acc:HGNC:683]	0.953693
ICAM2	intercellular adhesion molecule 2 [Source:HGNC Symbol;Acc:HGNC:5345]	0.952381
RADX	RPA1 related single stranded DNA binding protein, X-linked [Source:HGNC Symbol;Acc:HGNC:25486]	0.952064
GPT2	glutamic--pyruvic transaminase 2 [Source:HGNC Symbol;Acc:HGNC:18062]	0.951677
ZBTB4	zinc finger and BTB domain containing 4 [Source:HGNC Symbol;Acc:HGNC:23847]	0.951391
SOX13	SRY-box transcription factor 13 [Source:HGNC Symbol;Acc:HGNC:11192]	0.951325
S100A7A	S100 calcium binding protein A7A [Source:HGNC Symbol;Acc:HGNC:21657]	0.951221
SNX6	sorting nexin 6 [Source:HGNC Symbol;Acc:HGNC:14970]	0.951111
KRTCAP3	keratinocyte associated protein 3 [Source:HGNC Symbol;Acc:HGNC:28943]	0.950562
NUPR1	nuclear protein 1, transcriptional regulator [Source:HGNC Symbol;Acc:HGNC:29990]	0.949917
YJEFN3	YjeF N-terminal domain containing 3 [Source:HGNC Symbol;Acc:HGNC:24785]	0.949743
MLH3	mutL homolog 3 [Source:HGNC Symbol;Acc:HGNC:7128]	0.949731
GNAZ	G protein subunit alpha z [Source:HGNC Symbol;Acc:HGNC:4395]	0.946532
ADORA3	adenosine A3 receptor [Source:HGNC Symbol;Acc:HGNC:268]	0.946086
LFNG	LFNG O-fucosylpeptide 3-beta-N-acetylglucosaminyltransferase [Source:HGNC Symbol;Acc:HGNC:6560]	0.94603
AOC2	amine oxidase copper containing 2 [Source:HGNC Symbol;Acc:HGNC:549]	0.945073
CCNO	cyclin O [Source:HGNC Symbol;Acc:HGNC:18576]	0.944734
HDAC11	histone deacetylase 11 [Source:HGNC Symbol;Acc:HGNC:19086]	0.944728
SCAND1	SCAN domain containing 1 [Source:HGNC Symbol;Acc:HGNC:10566]	0.944174
MAP3K15	mitogen-activated protein kinase kinase kinase 15 [Source:HGNC Symbol;Acc:HGNC:31689]	0.944123
MTARC1	mitochondrial amidoxime reducing component 1 [Source:HGNC Symbol;Acc:HGNC:26189]	0.943409
LINC-PINT	long intergenic non-protein coding RNA, p53 induced transcript [Source:HGNC Symbol;Acc:HGNC:26885]	0.943281
MR1	major histocompatibility complex, class I-related [Source:HGNC Symbol;Acc:HGNC:4975]	0.942693
LRRC75A	leucine rich repeat containing 75A [Source:HGNC Symbol;Acc:HGNC:32403]	0.942639
KYAT1	kynurenine aminotransferase 1 [Source:HGNC Symbol;Acc:HGNC:1564]	0.942523
SLC9A5	solute carrier family 9 member A5 [Source:HGNC Symbol;Acc:HGNC:11078]	0.942292
ZFR2	zinc finger RNA binding protein 2 [Source:HGNC Symbol;Acc:HGNC:29189]	0.941823
PXMP2	peroxisomal membrane protein 2 [Source:HGNC Symbol;Acc:HGNC:9716]	0.941278
SMOX	spermine oxidase [Source:HGNC Symbol;Acc:HGNC:15862]	0.940592
FAM3B	FAM3 metabolism regulating signaling molecule B [Source:HGNC Symbol;Acc:HGNC:1253]	0.940494
ST6GALNAC4	ST6 N-acetylgalactosaminide alpha-2,6-sialyltransferase 4 [Source:HGNC Symbol;Acc:HGNC:17846]	0.93923
BCL2L14	BCL2 like 14 [Source:HGNC Symbol;Acc:HGNC:16657]	0.938726
CDCA7L	cell division cycle associated 7 like [Source:HGNC Symbol;Acc:HGNC:30777]	0.938582
MT-CO3	mitochondrially encoded cytochrome c oxidase III [Source:HGNC Symbol;Acc:HGNC:7422]	0.938444
TGM2	transglutaminase 2 [Source:HGNC Symbol;Acc:HGNC:11778]	0.938187
ELL	elongation factor for RNA polymerase II [Source:HGNC Symbol;Acc:HGNC:23114]	0.937662
PRDM9	PR/SET domain 9 [Source:HGNC Symbol;Acc:HGNC:13994]	0.937508
ZNF496	zinc finger protein 496 [Source:HGNC Symbol;Acc:HGNC:23713]	0.933135
SLC30A4	solute carrier family 30 member 4 [Source:HGNC Symbol;Acc:HGNC:11015]	0.933031
FAM170B	family with sequence similarity 170 member B [Source:HGNC Symbol;Acc:HGNC:19736]	0.933014
CATSPERG	cation channel sperm associated auxiliary subunit gamma [Source:HGNC Symbol;Acc:HGNC:25243]	0.930721
KAZN	kazrin, periplakin interacting protein [Source:HGNC Symbol;Acc:HGNC:29173]	0.930385
APOC1	apolipoprotein C1 [Source:HGNC Symbol;Acc:HGNC:607]	0.930032
DDB2	damage specific DNA binding protein 2 [Source:HGNC Symbol;Acc:HGNC:2718]	0.930004
CHAF1B	chromatin assembly factor 1 subunit B [Source:HGNC Symbol;Acc:HGNC:1911]	0.92971
LYRM7	LYR motif containing 7 [Source:HGNC Symbol;Acc:HGNC:28072]	0.92966
GSTM2	glutathione S-transferase mu 2 [Source:HGNC Symbol;Acc:HGNC:4634]	0.929177
NFKBIA	NFKB inhibitor alpha [Source:HGNC Symbol;Acc:HGNC:7797]	0.929155
IFI30	IFI30 lysosomal thiol reductase [Source:HGNC Symbol;Acc:HGNC:5398]	0.928929
JUNB	JunB proto-oncogene, AP-1 transcription factor subunit [Source:HGNC Symbol;Acc:HGNC:6205]	0.927642
NUDT17	nudix hydrolase 17 [Source:HGNC Symbol;Acc:HGNC:26618]	0.92714
CHRNA9	cholinergic receptor nicotinic alpha 9 subunit [Source:HGNC Symbol;Acc:HGNC:14079]	0.927139
ERP27	endoplasmic reticulum protein 27 [Source:HGNC Symbol;Acc:HGNC:26495]	0.925983
CKAP4	cytoskeleton associated protein 4 [Source:HGNC Symbol;Acc:HGNC:16991]	0.925816
BCL11A	BAF chromatin remodeling complex subunit BCL11A [Source:HGNC Symbol;Acc:HGNC:13221]	0.924745
DEF8	differentially expressed in FDCP 8 homolog [Source:HGNC Symbol;Acc:HGNC:25969]	0.924429
SLCO3A1	solute carrier organic anion transporter family member 3A1 [Source:HGNC Symbol;Acc:HGNC:10952]	0.923965
SORBS2	sorbin and SH3 domain containing 2 [Source:HGNC Symbol;Acc:HGNC:24098]	0.92376
CHAD	chondroadherin [Source:HGNC Symbol;Acc:HGNC:1909]	0.923698
HIVEP2	HIVEP zinc finger 2 [Source:HGNC Symbol;Acc:HGNC:4921]	0.923664
TMEM53	transmembrane protein 53 [Source:HGNC Symbol;Acc:HGNC:26186]	0.922802
PKDCC	protein kinase domain containing, cytoplasmic [Source:HGNC Symbol;Acc:HGNC:25123]	0.922171
AIF1	allograft inflammatory factor 1 [Source:HGNC Symbol;Acc:HGNC:352]	0.920152
IQCC	IQ motif containing C [Source:HGNC Symbol;Acc:HGNC:25545]	0.919383
ARHGDIG	Rho GDP dissociation inhibitor gamma [Source:HGNC Symbol;Acc:HGNC:680]	0.91885
CABLES1	Cdk5 and Abl enzyme substrate 1 [Source:HGNC Symbol;Acc:HGNC:25097]	0.918447
ZNF217	zinc finger protein 217 [Source:HGNC Symbol;Acc:HGNC:13009]	0.918391
GMPR	guanosine monophosphate reductase [Source:HGNC Symbol;Acc:HGNC:4376]	0.918116
CAPN3	calpain 3 [Source:HGNC Symbol;Acc:HGNC:1480]	0.915917
FAM229B	family with sequence similarity 229 member B [Source:HGNC Symbol;Acc:HGNC:33858]	0.915851
SPRY2	sprouty RTK signaling antagonist 2 [Source:HGNC Symbol;Acc:HGNC:11270]	0.915822
MFSD2A	major facilitator superfamily domain containing 2A [Source:HGNC Symbol;Acc:HGNC:25897]	0.915397
LEPR	leptin receptor [Source:HGNC Symbol;Acc:HGNC:6554]	0.915332
RLF	RLF zinc finger [Source:HGNC Symbol;Acc:HGNC:10025]	0.915212
POLI	DNA polymerase iota [Source:HGNC Symbol;Acc:HGNC:9182]	0.914179
IFITM3	interferon induced transmembrane protein 3 [Source:HGNC Symbol;Acc:HGNC:5414]	0.912073
ITGA10	integrin subunit alpha 10 [Source:HGNC Symbol;Acc:HGNC:6135]	0.911417
DGKA	diacylglycerol kinase alpha [Source:HGNC Symbol;Acc:HGNC:2849]	0.911033
PLCD1	phospholipase C delta 1 [Source:HGNC Symbol;Acc:HGNC:9060]	0.910714
RNF31	ring finger protein 31 [Source:HGNC Symbol;Acc:HGNC:16031]	0.909849
C1QC	complement C1q C chain [Source:HGNC Symbol;Acc:HGNC:1245]	0.909698
JRK	Jrk helix-turn-helix protein [Source:HGNC Symbol;Acc:HGNC:6199]	0.909674
MT-TL2	mitochondrially encoded tRNA-Leu (CUN) 2 [Source:HGNC Symbol;Acc:HGNC:7491]	0.908716
HOXB7	homeobox B7 [Source:HGNC Symbol;Acc:HGNC:5118]	0.90793
PLA1A	phospholipase A1 member A [Source:HGNC Symbol;Acc:HGNC:17661]	0.907276
AP2A2	adaptor related protein complex 2 subunit alpha 2 [Source:HGNC Symbol;Acc:HGNC:562]	0.90718
ACVR1B	activin A receptor type 1B [Source:HGNC Symbol;Acc:HGNC:172]	0.90713
ST14	ST14 transmembrane serine protease matriptase [Source:HGNC Symbol;Acc:HGNC:11344]	0.906281
B3GNTL1	UDP-GlcNAc:betaGal beta-1,3-N-acetylglucosaminyltransferase like 1 [Source:HGNC Symbol;Acc:HGNC:21727]	0.90625
GGCT	gamma-glutamylcyclotransferase [Source:HGNC Symbol;Acc:HGNC:21705]	0.906225
C1orf226	chromosome 1 open reading frame 226 [Source:HGNC Symbol;Acc:HGNC:34351]	0.906222
B4GALNT1	beta-1,4-N-acetyl-galactosaminyltransferase 1 [Source:HGNC Symbol;Acc:HGNC:4117]	0.905381
ELOVL6	ELOVL fatty acid elongase 6 [Source:HGNC Symbol;Acc:HGNC:15829]	0.904405
SLC44A2	solute carrier family 44 member 2 [Source:HGNC Symbol;Acc:HGNC:17292]	0.902507
VPS37B	VPS37B subunit of ESCRT-I [Source:HGNC Symbol;Acc:HGNC:25754]	0.901422
CRYZL2P	crystallin zeta like 2, pseudogene [Source:HGNC Symbol;Acc:HGNC:52164]	0.90136
DNAAF3	dynein axonemal assembly factor 3 [Source:HGNC Symbol;Acc:HGNC:30492]	0.900393
CCR10	C-C motif chemokine receptor 10 [Source:HGNC Symbol;Acc:HGNC:4474]	0.898957
RILPL1	Rab interacting lysosomal protein like 1 [Source:HGNC Symbol;Acc:HGNC:26814]	0.898204
KCNC3	potassium voltage-gated channel subfamily C member 3 [Source:HGNC Symbol;Acc:HGNC:6235]	0.89767
ASCL2	achaete-scute family bHLH transcription factor 2 [Source:HGNC Symbol;Acc:HGNC:739]	0.897666
TGFBI	transforming growth factor beta induced [Source:HGNC Symbol;Acc:HGNC:11771]	0.897392
DCUN1D4	defective in cullin neddylation 1 domain containing 4 [Source:HGNC Symbol;Acc:HGNC:28998]	0.897143
FAM169B	family with sequence similarity 169 member B [Source:HGNC Symbol;Acc:HGNC:26835]	0.896492
DCST1	DC-STAMP domain containing 1 [Source:HGNC Symbol;Acc:HGNC:26539]	0.896433
SAP30	Sin3A associated protein 30 [Source:HGNC Symbol;Acc:HGNC:10532]	0.89638
DMRTA2	DMRT like family A2 [Source:HGNC Symbol;Acc:HGNC:13908]	0.895968
ATP13A4	ATPase 13A4 [Source:HGNC Symbol;Acc:HGNC:25422]	0.895835
SLC28A2	solute carrier family 28 member 2 [Source:HGNC Symbol;Acc:HGNC:11002]	0.895765
SMIM3	small integral membrane protein 3 [Source:HGNC Symbol;Acc:HGNC:30248]	0.895317
ACY3	aminoacylase 3 [Source:HGNC Symbol;Acc:HGNC:24104]	0.895249
DNAJC6	DnaJ heat shock protein family (Hsp40) member C6 [Source:HGNC Symbol;Acc:HGNC:15469]	0.894932
FBXL21P	F-box and leucine rich repeat protein 21, pseudogene [Source:HGNC Symbol;Acc:HGNC:13600]	0.894207
DNASE1L3	deoxyribonuclease 1 like 3 [Source:HGNC Symbol;Acc:HGNC:2959]	0.89394
SERTAD2	SERTA domain containing 2 [Source:HGNC Symbol;Acc:HGNC:30784]	0.893137
FAM71E1	family with sequence similarity 71 member E1 [Source:HGNC Symbol;Acc:HGNC:25107]	0.891978
GSAP	gamma-secretase activating protein [Source:HGNC Symbol;Acc:HGNC:28042]	0.891155
SMIM35	small integral membrane protein 35 [Source:HGNC Symbol;Acc:HGNC:44179]	0.890152
ALDOA	aldolase, fructose-bisphosphate A [Source:HGNC Symbol;Acc:HGNC:414]	0.889671
HOXA4	homeobox A4 [Source:HGNC Symbol;Acc:HGNC:5105]	0.889106
NOS1AP	nitric oxide synthase 1 adaptor protein [Source:HGNC Symbol;Acc:HGNC:16859]	0.888296
SELENON	selenoprotein N [Source:HGNC Symbol;Acc:HGNC:15999]	0.888059
POU6F1	POU class 6 homeobox 1 [Source:HGNC Symbol;Acc:HGNC:9224]	0.886353
TMC3	transmembrane channel like 3 [Source:HGNC Symbol;Acc:HGNC:22995]	0.886233
KLK1	kallikrein 1 [Source:HGNC Symbol;Acc:HGNC:6357]	0.884562
LMBR1	limb development membrane protein 1 [Source:HGNC Symbol;Acc:HGNC:13243]	0.884451
GM2A	GM2 ganglioside activator [Source:HGNC Symbol;Acc:HGNC:4367]	0.884337
WNT6	Wnt family member 6 [Source:HGNC Symbol;Acc:HGNC:12785]	0.883175
TXNDC2	thioredoxin domain containing 2 [Source:HGNC Symbol;Acc:HGNC:16470]	0.882776
WARS1	tryptophanyl-tRNA synthetase 1 [Source:HGNC Symbol;Acc:HGNC:12729]	0.880727
HLA-E	major histocompatibility complex, class I, E [Source:HGNC Symbol;Acc:HGNC:4962]	0.880682
ELMO2	engulfment and cell motility 2 [Source:HGNC Symbol;Acc:HGNC:17233]	0.880545
CD163	CD163 molecule [Source:HGNC Symbol;Acc:HGNC:1631]	0.879397
IFITM5	interferon induced transmembrane protein 5 [Source:HGNC Symbol;Acc:HGNC:16644]	0.87919
MLKL	mixed lineage kinase domain like pseudokinase [Source:HGNC Symbol;Acc:HGNC:26617]	0.878351
HSPA12A	heat shock protein family A (Hsp70) member 12A [Source:HGNC Symbol;Acc:HGNC:19022]	0.877517
DAZL	deleted in azoospermia like [Source:HGNC Symbol;Acc:HGNC:2685]	0.877517
RHOC	ras homolog family member C [Source:HGNC Symbol;Acc:HGNC:669]	0.877259
ATG4C	autophagy related 4C cysteine peptidase [Source:HGNC Symbol;Acc:HGNC:16040]	0.877132
SHE	Src homology 2 domain containing E [Source:HGNC Symbol;Acc:HGNC:27004]	0.876815
TNFSF8	TNF superfamily member 8 [Source:HGNC Symbol;Acc:HGNC:11938]	0.876543
SIDT2	SID1 transmembrane family member 2 [Source:HGNC Symbol;Acc:HGNC:24272]	0.876343
SYCP2L	synaptonemal complex protein 2 like [Source:HGNC Symbol;Acc:HGNC:21537]	0.876296
CNBD2	cyclic nucleotide binding domain containing 2 [Source:HGNC Symbol;Acc:HGNC:16145]	0.875969
PKD1L3	polycystin 1 like 3, transient receptor potential channel interacting [Source:HGNC Symbol;Acc:HGNC:21716]	0.875489
SLC25A31	solute carrier family 25 member 31 [Source:HGNC Symbol;Acc:HGNC:25319]	0.874985
SLC22A17	solute carrier family 22 member 17 [Source:HGNC Symbol;Acc:HGNC:23095]	0.874605
TET2	tet methylcytosine dioxygenase 2 [Source:HGNC Symbol;Acc:HGNC:25941]	0.873391
ASB2	ankyrin repeat and SOCS box containing 2 [Source:HGNC Symbol;Acc:HGNC:16012]	0.873001
ATRNL1	attractin like 1 [Source:HGNC Symbol;Acc:HGNC:29063]	0.871644
SEC31B	SEC31 homolog B, COPII coat complex component [Source:HGNC Symbol;Acc:HGNC:23197]	0.871056
TES	testin LIM domain protein [Source:HGNC Symbol;Acc:HGNC:14620]	0.870845
MT-TS2	mitochondrially encoded tRNA-Ser (AGU/C) 2 [Source:HGNC Symbol;Acc:HGNC:7498]	0.870397
ZNF467	zinc finger protein 467 [Source:HGNC Symbol;Acc:HGNC:23154]	0.870386
SLC37A1	solute carrier family 37 member 1 [Source:HGNC Symbol;Acc:HGNC:11024]	0.869565
CCDC80	coiled-coil domain containing 80 [Source:HGNC Symbol;Acc:HGNC:30649]	0.869016
SLC25A41	solute carrier family 25 member 41 [Source:HGNC Symbol;Acc:HGNC:28533]	0.868751
KY	kyphoscoliosis peptidase [Source:HGNC Symbol;Acc:HGNC:26576]	0.868431
LRRC28	leucine rich repeat containing 28 [Source:HGNC Symbol;Acc:HGNC:28355]	0.868006
RALGPS2	Ral GEF with PH domain and SH3 binding motif 2 [Source:HGNC Symbol;Acc:HGNC:30279]	0.867966
NUDT16	nudix hydrolase 16 [Source:HGNC Symbol;Acc:HGNC:26442]	0.867626
ZCCHC24	zinc finger CCHC-type containing 24 [Source:HGNC Symbol;Acc:HGNC:26911]	0.867468
DYNC2LI1	dynein cytoplasmic 2 light intermediate chain 1 [Source:HGNC Symbol;Acc:HGNC:24595]	0.866261
KCNG3	potassium voltage-gated channel modifier subfamily G member 3 [Source:HGNC Symbol;Acc:HGNC:18306]	0.866025
KCNK4	potassium two pore domain channel subfamily K member 4 [Source:HGNC Symbol;Acc:HGNC:6279]	0.866025
KIF21A	kinesin family member 21A [Source:HGNC Symbol;Acc:HGNC:19349]	0.866025
SRGAP1	SLIT-ROBO Rho GTPase activating protein 1 [Source:HGNC Symbol;Acc:HGNC:17382]	0.866025
ABI3BP	ABI family member 3 binding protein [Source:HGNC Symbol;Acc:HGNC:17265]	0.865333
COPZ2	COPI coat complex subunit zeta 2 [Source:HGNC Symbol;Acc:HGNC:19356]	0.865098
GBP5	guanylate binding protein 5 [Source:HGNC Symbol;Acc:HGNC:19895]	0.864876
MARS1	methionyl-tRNA synthetase 1 [Source:HGNC Symbol;Acc:HGNC:6898]	0.864872
APOC2	apolipoprotein C2 [Source:HGNC Symbol;Acc:HGNC:609]	0.86448
MAPK8IP3	mitogen-activated protein kinase 8 interacting protein 3 [Source:HGNC Symbol;Acc:HGNC:6884]	0.864325
CAPRIN2	caprin family member 2 [Source:HGNC Symbol;Acc:HGNC:21259]	0.864078
PSD2	pleckstrin and Sec7 domain containing 2 [Source:HGNC Symbol;Acc:HGNC:19092]	0.863198
RAB24	RAB24, member RAS oncogene family [Source:HGNC Symbol;Acc:HGNC:9765]	0.862951
ACAP1	ArfGAP with coiled-coil, ankyrin repeat and PH domains 1 [Source:HGNC Symbol;Acc:HGNC:16467]	0.86244
PLCB2	phospholipase C beta 2 [Source:HGNC Symbol;Acc:HGNC:9055]	0.86234
CYP39A1	cytochrome P450 family 39 subfamily A member 1 [Source:HGNC Symbol;Acc:HGNC:17449]	0.861295
PDGFRA	platelet derived growth factor receptor alpha [Source:HGNC Symbol;Acc:HGNC:8803]	0.861021
MPST	mercaptopyruvate sulfurtransferase [Source:HGNC Symbol;Acc:HGNC:7223]	0.8608
WWOX	WW domain containing oxidoreductase [Source:HGNC Symbol;Acc:HGNC:12799]	0.860265
SERTAD3	SERTA domain containing 3 [Source:HGNC Symbol;Acc:HGNC:17931]	0.860098
ZFHX2	zinc finger homeobox 2 [Source:HGNC Symbol;Acc:HGNC:20152]	0.859423
LEFTY1	left-right determination factor 1 [Source:HGNC Symbol;Acc:HGNC:6552]	0.859268
TRIB1	tribbles pseudokinase 1 [Source:HGNC Symbol;Acc:HGNC:16891]	0.857926
CADPS	calcium dependent secretion activator [Source:HGNC Symbol;Acc:HGNC:1426]	0.857614
ATP2B2	ATPase plasma membrane Ca2+ transporting 2 [Source:HGNC Symbol;Acc:HGNC:815]	0.857614
TIPARP	TCDD inducible poly(ADP-ribose) polymerase [Source:HGNC Symbol;Acc:HGNC:23696]	0.857472
AMZ1	archaelysin family metallopeptidase 1 [Source:HGNC Symbol;Acc:HGNC:22231]	0.857028
LRTOMT	leucine rich transmembrane and O-methyltransferase domain containing [Source:HGNC Symbol;Acc:HGNC:25033]	0.855223
UBXN2A	UBX domain protein 2A [Source:HGNC Symbol;Acc:HGNC:27265]	0.854903
LRFN1	leucine rich repeat and fibronectin type III domain containing 1 [Source:HGNC Symbol;Acc:HGNC:29290]	0.854809
CNTNAP1	contactin associated protein 1 [Source:HGNC Symbol;Acc:HGNC:8011]	0.853762
HOTAIRM1	HOXA transcript antisense RNA, myeloid-specific 1 [Source:HGNC Symbol;Acc:HGNC:37117]	0.85361
ADAT2	adenosine deaminase tRNA specific 2 [Source:HGNC Symbol;Acc:HGNC:21172]	0.853389
TMSB4X	thymosin beta 4 X-linked [Source:HGNC Symbol;Acc:HGNC:11881]	0.85263
MPND	MPN domain containing [Source:HGNC Symbol;Acc:HGNC:25934]	0.852464
MEN1	menin 1 [Source:HGNC Symbol;Acc:HGNC:7010]	0.851636
CRTAM	cytotoxic and regulatory T cell molecule [Source:HGNC Symbol;Acc:HGNC:24313]	0.850853
EPHA4	EPH receptor A4 [Source:HGNC Symbol;Acc:HGNC:3388]	0.850666
KLHL36	kelch like family member 36 [Source:HGNC Symbol;Acc:HGNC:17844]	0.850656
FAM13A	family with sequence similarity 13 member A [Source:HGNC Symbol;Acc:HGNC:19367]	0.849852
POLR1A	RNA polymerase I subunit A [Source:HGNC Symbol;Acc:HGNC:17264]	0.849532
PTCH1	patched 1 [Source:HGNC Symbol;Acc:HGNC:9585]	0.848531
ACSS2	acyl-CoA synthetase short chain family member 2 [Source:HGNC Symbol;Acc:HGNC:15814]	0.847919
FGF1	fibroblast growth factor 1 [Source:HGNC Symbol;Acc:HGNC:3665]	0.84777
RNF145	ring finger protein 145 [Source:HGNC Symbol;Acc:HGNC:20853]	0.847219
ZC3HAV1L	zinc finger CCCH-type containing, antiviral 1 like [Source:HGNC Symbol;Acc:HGNC:22423]	0.846819
STX3	syntaxin 3 [Source:HGNC Symbol;Acc:HGNC:11438]	0.846511
ZNF334	zinc finger protein 334 [Source:HGNC Symbol;Acc:HGNC:15806]	0.845468
FURIN	furin, paired basic amino acid cleaving enzyme [Source:HGNC Symbol;Acc:HGNC:8568]	0.845323
TNFRSF8	TNF receptor superfamily member 8 [Source:HGNC Symbol;Acc:HGNC:11923]	0.844713
PXYLP1	2-phosphoxylose phosphatase 1 [Source:HGNC Symbol;Acc:HGNC:26303]	0.844017
FYB2	FYN binding protein 2 [Source:HGNC Symbol;Acc:HGNC:27295]	0.843979
CCN2	cellular communication network factor 2 [Source:HGNC Symbol;Acc:HGNC:2500]	0.843964
ISLR	immunoglobulin superfamily containing leucine rich repeat [Source:HGNC Symbol;Acc:HGNC:6133]	0.843484
ARHGAP4	Rho GTPase activating protein 4 [Source:HGNC Symbol;Acc:HGNC:674]	0.842376
MT-TS1	mitochondrially encoded tRNA-Ser (UCN) 1 [Source:HGNC Symbol;Acc:HGNC:7497]	0.842113
EMC9	ER membrane protein complex subunit 9 [Source:HGNC Symbol;Acc:HGNC:20273]	0.840942
TBKBP1	TBK1 binding protein 1 [Source:HGNC Symbol;Acc:HGNC:30140]	0.840928
PIWIL4	piwi like RNA-mediated gene silencing 4 [Source:HGNC Symbol;Acc:HGNC:18444]	0.840384
CAPN5	calpain 5 [Source:HGNC Symbol;Acc:HGNC:1482]	0.838762
THSD1	thrombospondin type 1 domain containing 1 [Source:HGNC Symbol;Acc:HGNC:17754]	0.837838
SRR	serine racemase [Source:HGNC Symbol;Acc:HGNC:14398]	0.837766
VWA3B	von Willebrand factor A domain containing 3B [Source:HGNC Symbol;Acc:HGNC:28385]	0.837572
MED12L	mediator complex subunit 12L [Source:HGNC Symbol;Acc:HGNC:16050]	0.837563
DNAH17	dynein axonemal heavy chain 17 [Source:HGNC Symbol;Acc:HGNC:2946]	0.837462
ETHE1	ETHE1 persulfide dioxygenase [Source:HGNC Symbol;Acc:HGNC:23287]	0.837429
SLC35G1	solute carrier family 35 member G1 [Source:HGNC Symbol;Acc:HGNC:26607]	0.836331
DUS2	dihydrouridine synthase 2 [Source:HGNC Symbol;Acc:HGNC:26014]	0.836316
GALK1	galactokinase 1 [Source:HGNC Symbol;Acc:HGNC:4118]	0.836245
PRRG4	proline rich and Gla domain 4 [Source:HGNC Symbol;Acc:HGNC:30799]	0.835473
PDK2	pyruvate dehydrogenase kinase 2 [Source:HGNC Symbol;Acc:HGNC:8810]	0.835323
VSIR	V-set immunoregulatory receptor [Source:HGNC Symbol;Acc:HGNC:30085]	0.835263
FITM1	fat storage inducing transmembrane protein 1 [Source:HGNC Symbol;Acc:HGNC:33714]	0.833788
PGAP6	post-glycosylphosphatidylinositol attachment to proteins 6 [Source:HGNC Symbol;Acc:HGNC:17205]	0.832902
TLCD3A	TLC domain containing 3A [Source:HGNC Symbol;Acc:HGNC:29646]	0.832723
PGAP2	post-GPI attachment to proteins 2 [Source:HGNC Symbol;Acc:HGNC:17893]	0.832304
TNK2	tyrosine kinase non receptor 2 [Source:HGNC Symbol;Acc:HGNC:19297]	0.832291
COX19	cytochrome c oxidase assembly factor COX19 [Source:HGNC Symbol;Acc:HGNC:28074]	0.832291
BRDT	bromodomain testis associated [Source:HGNC Symbol;Acc:HGNC:1105]	0.831874
SLC8A1	solute carrier family 8 member A1 [Source:HGNC Symbol;Acc:HGNC:11068]	0.831569
AUH	AU RNA binding methylglutaconyl-CoA hydratase [Source:HGNC Symbol;Acc:HGNC:890]	0.830449
MEDAG	mesenteric estrogen dependent adipogenesis [Source:HGNC Symbol;Acc:HGNC:25926]	0.830266
ADGRG5	adhesion G protein-coupled receptor G5 [Source:HGNC Symbol;Acc:HGNC:19010]	0.830068
MMP19	matrix metallopeptidase 19 [Source:HGNC Symbol;Acc:HGNC:7165]	0.829834
CASP3	caspase 3 [Source:HGNC Symbol;Acc:HGNC:1504]	0.829746
IP6K3	inositol hexakisphosphate kinase 3 [Source:HGNC Symbol;Acc:HGNC:17269]	0.829582
RARG	retinoic acid receptor gamma [Source:HGNC Symbol;Acc:HGNC:9866]	0.829507
DNHD1	dynein heavy chain domain 1 [Source:HGNC Symbol;Acc:HGNC:26532]	0.829499
DCAF1	DDB1 and CUL4 associated factor 1 [Source:HGNC Symbol;Acc:HGNC:30911]	0.829366
PSMB8	proteasome 20S subunit beta 8 [Source:HGNC Symbol;Acc:HGNC:9545]	0.829314
INSL6	insulin like 6 [Source:HGNC Symbol;Acc:HGNC:6089]	0.828502
C1QTNF6	C1q and TNF related 6 [Source:HGNC Symbol;Acc:HGNC:14343]	0.82808
MS4A6A	membrane spanning 4-domains A6A [Source:HGNC Symbol;Acc:HGNC:13375]	0.828028
SV2A	synaptic vesicle glycoprotein 2A [Source:HGNC Symbol;Acc:HGNC:20566]	0.828001
TLR4	toll like receptor 4 [Source:HGNC Symbol;Acc:HGNC:11850]	0.827731
CYP27B1	cytochrome P450 family 27 subfamily B member 1 [Source:HGNC Symbol;Acc:HGNC:2606]	0.82736
TMC4	transmembrane channel like 4 [Source:HGNC Symbol;Acc:HGNC:22998]	0.826
MVB12B	multivesicular body subunit 12B [Source:HGNC Symbol;Acc:HGNC:23368]	0.824941
PEX26	peroxisomal biogenesis factor 26 [Source:HGNC Symbol;Acc:HGNC:22965]	0.823659
LGALS4	galectin 4 [Source:HGNC Symbol;Acc:HGNC:6565]	0.823262
CERS6	ceramide synthase 6 [Source:HGNC Symbol;Acc:HGNC:23826]	0.821876
GATM	glycine amidinotransferase [Source:HGNC Symbol;Acc:HGNC:4175]	0.821717
RPS6KC1	ribosomal protein S6 kinase C1 [Source:HGNC Symbol;Acc:HGNC:10439]	0.820561
LRRN4CL	LRRN4 C-terminal like [Source:HGNC Symbol;Acc:HGNC:33724]	0.819347
MEX3D	mex-3 RNA binding family member D [Source:HGNC Symbol;Acc:HGNC:16734]	0.818966
USP30	ubiquitin specific peptidase 30 [Source:HGNC Symbol;Acc:HGNC:20065]	0.81846
CAMTA1	calmodulin binding transcription activator 1 [Source:HGNC Symbol;Acc:HGNC:18806]	0.818182
TNFRSF13B	TNF receptor superfamily member 13B [Source:HGNC Symbol;Acc:HGNC:18153]	0.818182
ZNF827	zinc finger protein 827 [Source:HGNC Symbol;Acc:HGNC:27193]	0.818102
TSPO	translocator protein [Source:HGNC Symbol;Acc:HGNC:1158]	0.8181
RGL3	ral guanine nucleotide dissociation stimulator like 3 [Source:HGNC Symbol;Acc:HGNC:30282]	0.81795
PGBD1	piggyBac transposable element derived 1 [Source:HGNC Symbol;Acc:HGNC:19398]	0.817147
VEGFD	vascular endothelial growth factor D [Source:HGNC Symbol;Acc:HGNC:3708]	0.817147
CAMK2N1	calcium/calmodulin dependent protein kinase II inhibitor 1 [Source:HGNC Symbol;Acc:HGNC:24190]	0.81666
SRGN	serglycin [Source:HGNC Symbol;Acc:HGNC:9361]	0.815669
SLC25A12	solute carrier family 25 member 12 [Source:HGNC Symbol;Acc:HGNC:10982]	0.815104
CCN1	cellular communication network factor 1 [Source:HGNC Symbol;Acc:HGNC:2654]	0.814746
DBNL	drebrin like [Source:HGNC Symbol;Acc:HGNC:2696]	0.81435
VEGFA	vascular endothelial growth factor A [Source:HGNC Symbol;Acc:HGNC:12680]	0.814176
AMH	anti-Mullerian hormone [Source:HGNC Symbol;Acc:HGNC:464]	0.813953
HCFC1R1	host cell factor C1 regulator 1 [Source:HGNC Symbol;Acc:HGNC:21198]	0.813352
RFESD	Rieske Fe-S domain containing [Source:HGNC Symbol;Acc:HGNC:29587]	0.813066
C10orf105	chromosome 10 open reading frame 105 [Source:HGNC Symbol;Acc:HGNC:20304]	0.812956
CCDC14	coiled-coil domain containing 14 [Source:HGNC Symbol;Acc:HGNC:25766]	0.812918
POLR1G	RNA polymerase I subunit G [Source:HGNC Symbol;Acc:HGNC:24219]	0.812527
HEXIM2	HEXIM P-TEFb complex subunit 2 [Source:HGNC Symbol;Acc:HGNC:28591]	0.812474
KHNYN	KH and NYN domain containing [Source:HGNC Symbol;Acc:HGNC:20166]	0.811416
KLHL26	kelch like family member 26 [Source:HGNC Symbol;Acc:HGNC:25623]	0.810486
UNC13D	unc-13 homolog D [Source:HGNC Symbol;Acc:HGNC:23147]	0.808807
SORBS1	sorbin and SH3 domain containing 1 [Source:HGNC Symbol;Acc:HGNC:14565]	0.808768
MPP6	membrane palmitoylated protein 6 [Source:HGNC Symbol;Acc:HGNC:18167]	0.80853
DLX5	distal-less homeobox 5 [Source:HGNC Symbol;Acc:HGNC:2918]	0.80829
GRAMD4	GRAM domain containing 4 [Source:HGNC Symbol;Acc:HGNC:29113]	0.807938
RIIAD1	regulatory subunit of type II PKA R-subunit domain containing 1 [Source:HGNC Symbol;Acc:HGNC:26686]	0.807888
SPA17	sperm autoantigenic protein 17 [Source:HGNC Symbol;Acc:HGNC:11210]	0.805817
DGAT1	diacylglycerol O-acyltransferase 1 [Source:HGNC Symbol;Acc:HGNC:2843]	0.805679
MAP3K14	mitogen-activated protein kinase kinase kinase 14 [Source:HGNC Symbol;Acc:HGNC:6853]	0.805157
COX8A	cytochrome c oxidase subunit 8A [Source:HGNC Symbol;Acc:HGNC:2294]	0.803918
FAM83C	family with sequence similarity 83 member C [Source:HGNC Symbol;Acc:HGNC:16121]	0.803848
GFRA2	GDNF family receptor alpha 2 [Source:HGNC Symbol;Acc:HGNC:4244]	0.803848
ITM2A	integral membrane protein 2A [Source:HGNC Symbol;Acc:HGNC:6173]	0.803815
RAPGEFL1	Rap guanine nucleotide exchange factor like 1 [Source:HGNC Symbol;Acc:HGNC:17428]	0.803475
SGMS1-AS1	SGMS1 antisense RNA 1 [Source:HGNC Symbol;Acc:HGNC:49683]	0.803315
ZNFX1	zinc finger NFX1-type containing 1 [Source:HGNC Symbol;Acc:HGNC:29271]	0.80227
FUZ	fuzzy planar cell polarity protein [Source:HGNC Symbol;Acc:HGNC:26219]	0.801593
FFAR2	free fatty acid receptor 2 [Source:HGNC Symbol;Acc:HGNC:4501]	0.801435
GSTP1	glutathione S-transferase pi 1 [Source:HGNC Symbol;Acc:HGNC:4638]	0.800894
CPA2	carboxypeptidase A2 [Source:HGNC Symbol;Acc:HGNC:2297]	0.800129
RPSA	ribosomal protein SA [Source:HGNC Symbol;Acc:HGNC:6502]	0.799902
OGN	osteoglycin [Source:HGNC Symbol;Acc:HGNC:8126]	0.799742
SPIRE1	spire type actin nucleation factor 1 [Source:HGNC Symbol;Acc:HGNC:30622]	0.799282
TCF7L2	transcription factor 7 like 2 [Source:HGNC Symbol;Acc:HGNC:11641]	0.798294
SNORD32A	small nucleolar RNA, C/D box 32A [Source:HGNC Symbol;Acc:HGNC:10159]	0.797585
MMP11	matrix metallopeptidase 11 [Source:HGNC Symbol;Acc:HGNC:7157]	0.797308
HLA-DQB2	major histocompatibility complex, class II, DQ beta 2 [Source:HGNC Symbol;Acc:HGNC:4945]	0.796408
TCTN1	tectonic family member 1 [Source:HGNC Symbol;Acc:HGNC:26113]	0.795516
LNX1	ligand of numb-protein X 1 [Source:HGNC Symbol;Acc:HGNC:6657]	0.79538
PRELID1	PRELI domain containing 1 [Source:HGNC Symbol;Acc:HGNC:30255]	0.794121
ESM1	endothelial cell specific molecule 1 [Source:HGNC Symbol;Acc:HGNC:3466]	0.792837
PPP1R3D	protein phosphatase 1 regulatory subunit 3D [Source:HGNC Symbol;Acc:HGNC:9294]	0.79276
PPFIA3	PTPRF interacting protein alpha 3 [Source:HGNC Symbol;Acc:HGNC:9247]	0.792718
UBALD2	UBA like domain containing 2 [Source:HGNC Symbol;Acc:HGNC:28438]	0.792054
TFCP2L1	transcription factor CP2 like 1 [Source:HGNC Symbol;Acc:HGNC:17925]	0.791813
CPT1C	carnitine palmitoyltransferase 1C [Source:HGNC Symbol;Acc:HGNC:18540]	0.791409
CCDC146	coiled-coil domain containing 146 [Source:HGNC Symbol;Acc:HGNC:29296]	0.790911
VMP1	vacuole membrane protein 1 [Source:HGNC Symbol;Acc:HGNC:29559]	0.790455
TBC1D8	TBC1 domain family member 8 [Source:HGNC Symbol;Acc:HGNC:17791]	0.789657
ZFP41	ZFP41 zinc finger protein [Source:HGNC Symbol;Acc:HGNC:26786]	0.788538
RDH5	retinol dehydrogenase 5 [Source:HGNC Symbol;Acc:HGNC:9940]	0.788421
GPX1	glutathione peroxidase 1 [Source:HGNC Symbol;Acc:HGNC:4553]	0.788097
LMLN	leishmanolysin like peptidase [Source:HGNC Symbol;Acc:HGNC:15991]	0.787147
CHD7	chromodomain helicase DNA binding protein 7 [Source:HGNC Symbol;Acc:HGNC:20626]	0.787052
B3GALT2	beta-1,3-galactosyltransferase 2 [Source:HGNC Symbol;Acc:HGNC:917]	0.786517
DNAJC15	DnaJ heat shock protein family (Hsp40) member C15 [Source:HGNC Symbol;Acc:HGNC:20325]	0.786184
NECAP2	NECAP endocytosis associated 2 [Source:HGNC Symbol;Acc:HGNC:25528]	0.786181
ZNF106	zinc finger protein 106 [Source:HGNC Symbol;Acc:HGNC:12886]	0.785636
TMEM241	transmembrane protein 241 [Source:HGNC Symbol;Acc:HGNC:31723]	0.785458
ZKSCAN7	zinc finger with KRAB and SCAN domains 7 [Source:HGNC Symbol;Acc:HGNC:12955]	0.785085
MAP10	microtubule associated protein 10 [Source:HGNC Symbol;Acc:HGNC:29265]	0.783878
CISD1	CDGSH iron sulfur domain 1 [Source:HGNC Symbol;Acc:HGNC:30880]	0.783586
AICDA	activation induced cytidine deaminase [Source:HGNC Symbol;Acc:HGNC:13203]	0.782153
SHISA5	shisa family member 5 [Source:HGNC Symbol;Acc:HGNC:30376]	0.781016
NT5DC2	5'-nucleotidase domain containing 2 [Source:HGNC Symbol;Acc:HGNC:25717]	0.78078
GGNBP1	gametogenetin binding protein 1 (pseudogene) [Source:HGNC Symbol;Acc:HGNC:19427]	0.780502
ISG15	ISG15 ubiquitin like modifier [Source:HGNC Symbol;Acc:HGNC:4053]	0.779888
TBXAS1	thromboxane A synthase 1 [Source:HGNC Symbol;Acc:HGNC:11609]	0.779235
GNG7	G protein subunit gamma 7 [Source:HGNC Symbol;Acc:HGNC:4410]	0.778976
CEP78	centrosomal protein 78 [Source:HGNC Symbol;Acc:HGNC:25740]	0.778689
HAAO	3-hydroxyanthranilate 3,4-dioxygenase [Source:HGNC Symbol;Acc:HGNC:4796]	0.777303
NEMP1	nuclear envelope integral membrane protein 1 [Source:HGNC Symbol;Acc:HGNC:29001]	0.776557
FAM102A	family with sequence similarity 102 member A [Source:HGNC Symbol;Acc:HGNC:31419]	0.776003
ZSWIM9	zinc finger SWIM-type containing 9 [Source:HGNC Symbol;Acc:HGNC:34495]	0.775792
FAM71F2	family with sequence similarity 71 member F2 [Source:HGNC Symbol;Acc:HGNC:27998]	0.77503
CRIM1	cysteine rich transmembrane BMP regulator 1 [Source:HGNC Symbol;Acc:HGNC:2359]	0.774971
NUDT12	nudix hydrolase 12 [Source:HGNC Symbol;Acc:HGNC:18826]	0.77456
NFIA	nuclear factor I A [Source:HGNC Symbol;Acc:HGNC:7784]	0.774366
AP1B1	adaptor related protein complex 1 subunit beta 1 [Source:HGNC Symbol;Acc:HGNC:554]	0.774077
PMEL	premelanosome protein [Source:HGNC Symbol;Acc:HGNC:10880]	0.773828
IFITM10	interferon induced transmembrane protein 10 [Source:HGNC Symbol;Acc:HGNC:40022]	0.773779
SLC37A4	solute carrier family 37 member 4 [Source:HGNC Symbol;Acc:HGNC:4061]	0.771668
TMEM176A	transmembrane protein 176A [Source:HGNC Symbol;Acc:HGNC:24930]	0.771514
BMP2K	BMP2 inducible kinase [Source:HGNC Symbol;Acc:HGNC:18041]	0.771095
UCP2	uncoupling protein 2 [Source:HGNC Symbol;Acc:HGNC:12518]	0.771018
IBTK	inhibitor of Bruton tyrosine kinase [Source:HGNC Symbol;Acc:HGNC:17853]	0.770788
NDUFV3	NADH:ubiquinone oxidoreductase subunit V3 [Source:HGNC Symbol;Acc:HGNC:7719]	0.770655
LZTS1	leucine zipper tumor suppressor 1 [Source:HGNC Symbol;Acc:HGNC:13861]	0.7698
FAM131C	family with sequence similarity 131 member C [Source:HGNC Symbol;Acc:HGNC:26717]	0.769354
SIX1	SIX homeobox 1 [Source:HGNC Symbol;Acc:HGNC:10887]	0.769245
TEX9	testis expressed 9 [Source:HGNC Symbol;Acc:HGNC:29585]	0.769109
FOXN3	forkhead box N3 [Source:HGNC Symbol;Acc:HGNC:1928]	0.76863
THEM6	thioesterase superfamily member 6 [Source:HGNC Symbol;Acc:HGNC:29656]	0.76762
TRIM72	tripartite motif containing 72 [Source:HGNC Symbol;Acc:HGNC:32671]	0.767334
VILL	villin like [Source:HGNC Symbol;Acc:HGNC:30906]	0.766539
INF2	inverted formin 2 [Source:HGNC Symbol;Acc:HGNC:23791]	0.766215
CLDN24	claudin 24 [Source:HGNC Symbol;Acc:HGNC:37200]	0.765759
RNASEH2A	ribonuclease H2 subunit A [Source:HGNC Symbol;Acc:HGNC:18518]	0.765564
HPX	hemopexin [Source:HGNC Symbol;Acc:HGNC:5171]	0.765361
PLET1	placenta expressed transcript 1 [Source:HGNC Symbol;Acc:HGNC:30053]	0.765186
RPGRIP1L	RPGRIP1 like [Source:HGNC Symbol;Acc:HGNC:29168]	0.764967
FBXL18	F-box and leucine rich repeat protein 18 [Source:HGNC Symbol;Acc:HGNC:21874]	0.764579
ANKRD13D	ankyrin repeat domain 13D [Source:HGNC Symbol;Acc:HGNC:27880]	0.764239
GBP2	guanylate binding protein 2 [Source:HGNC Symbol;Acc:HGNC:4183]	0.763925
ATG2A	autophagy related 2A [Source:HGNC Symbol;Acc:HGNC:29028]	0.763462
RFTN2	raftlin family member 2 [Source:HGNC Symbol;Acc:HGNC:26402]	0.763001
RAB30	RAB30, member RAS oncogene family [Source:HGNC Symbol;Acc:HGNC:9770]	0.762901
PPP1R32	protein phosphatase 1 regulatory subunit 32 [Source:HGNC Symbol;Acc:HGNC:28869]	0.761799
SCAMP1	secretory carrier membrane protein 1 [Source:HGNC Symbol;Acc:HGNC:10563]	0.761482
SMYD1	SET and MYND domain containing 1 [Source:HGNC Symbol;Acc:HGNC:20986]	0.761396
GMDS	GDP-mannose 4,6-dehydratase [Source:HGNC Symbol;Acc:HGNC:4369]	0.760658
SLC12A7	solute carrier family 12 member 7 [Source:HGNC Symbol;Acc:HGNC:10915]	0.759534
RGS9	regulator of G protein signaling 9 [Source:HGNC Symbol;Acc:HGNC:10004]	0.759186
MYCBP2	MYC binding protein 2 [Source:HGNC Symbol;Acc:HGNC:23386]	0.758535
PRKAB2	protein kinase AMP-activated non-catalytic subunit beta 2 [Source:HGNC Symbol;Acc:HGNC:9379]	0.757862
PRKCE	protein kinase C epsilon [Source:HGNC Symbol;Acc:HGNC:9401]	0.757841
BCL3	BCL3 transcription coactivator [Source:HGNC Symbol;Acc:HGNC:998]	0.757834
VHL	von Hippel-Lindau tumor suppressor [Source:HGNC Symbol;Acc:HGNC:12687]	0.756474
SMAD7	SMAD family member 7 [Source:HGNC Symbol;Acc:HGNC:6773]	0.75524
NDRG4	NDRG family member 4 [Source:HGNC Symbol;Acc:HGNC:14466]	0.755188
FAM178B	family with sequence similarity 178 member B [Source:HGNC Symbol;Acc:HGNC:28036]	0.754948
FGGY	FGGY carbohydrate kinase domain containing [Source:HGNC Symbol;Acc:HGNC:25610]	0.753968
TMEM236	transmembrane protein 236 [Source:HGNC Symbol;Acc:HGNC:23473]	0.753886
RSC1A1	regulator of solute carriers 1 [Source:HGNC Symbol;Acc:HGNC:10458]	0.753884
SLA	Src like adaptor [Source:HGNC Symbol;Acc:HGNC:10902]	0.753736
PLCB3	phospholipase C beta 3 [Source:HGNC Symbol;Acc:HGNC:9056]	0.752717
PLEKHG4	pleckstrin homology and RhoGEF domain containing G4 [Source:HGNC Symbol;Acc:HGNC:24501]	0.752158
ALDH1A2	aldehyde dehydrogenase 1 family member A2 [Source:HGNC Symbol;Acc:HGNC:15472]	0.751722
CEBPD	CCAAT enhancer binding protein delta [Source:HGNC Symbol;Acc:HGNC:1835]	0.751676
ARL9	ADP ribosylation factor like GTPase 9 [Source:HGNC Symbol;Acc:HGNC:23592]	0.751224
ZNF292	zinc finger protein 292 [Source:HGNC Symbol;Acc:HGNC:18410]	0.750853
TMEM52	transmembrane protein 52 [Source:HGNC Symbol;Acc:HGNC:27916]	0.750708
MRPL30	mitochondrial ribosomal protein L30 [Source:HGNC Symbol;Acc:HGNC:14036]	0.750044
ABCG4	ATP binding cassette subfamily G member 4 [Source:HGNC Symbol;Acc:HGNC:13884]	0.75
GUK1	guanylate kinase 1 [Source:HGNC Symbol;Acc:HGNC:4693]	0.749992
H2AC18	H2A clustered histone 18 [Source:HGNC Symbol;Acc:HGNC:4736]	0.749708
CHID1	chitinase domain containing 1 [Source:HGNC Symbol;Acc:HGNC:28474]	0.749154
TMEM44	transmembrane protein 44 [Source:HGNC Symbol;Acc:HGNC:25120]	0.749133
ALDH1A3	aldehyde dehydrogenase 1 family member A3 [Source:HGNC Symbol;Acc:HGNC:409]	0.749078
CCL27	C-C motif chemokine ligand 27 [Source:HGNC Symbol;Acc:HGNC:10626]	0.748827
ADAM10	ADAM metallopeptidase domain 10 [Source:HGNC Symbol;Acc:HGNC:188]	0.748416
DZIP3	DAZ interacting zinc finger protein 3 [Source:HGNC Symbol;Acc:HGNC:30938]	0.747918
FBXO39	F-box protein 39 [Source:HGNC Symbol;Acc:HGNC:28565]	0.74774
ERMAP	erythroblast membrane associated protein (Scianna blood group) [Source:HGNC Symbol;Acc:HGNC:15743]	0.747511
BBS12	Bardet-Biedl syndrome 12 [Source:HGNC Symbol;Acc:HGNC:26648]	0.746835
SLC22A13	solute carrier family 22 member 13 [Source:HGNC Symbol;Acc:HGNC:8494]	0.746728
TM7SF3	transmembrane 7 superfamily member 3 [Source:HGNC Symbol;Acc:HGNC:23049]	0.745785
THNSL1	threonine synthase like 1 [Source:HGNC Symbol;Acc:HGNC:26160]	0.745734
TM6SF2	transmembrane 6 superfamily member 2 [Source:HGNC Symbol;Acc:HGNC:11861]	0.745676
MATN3	matrilin 3 [Source:HGNC Symbol;Acc:HGNC:6909]	0.745431
HAGHL	hydroxyacylglutathione hydrolase like [Source:HGNC Symbol;Acc:HGNC:14177]	0.745356
SH3BGR	SH3 domain binding glutamate rich protein [Source:HGNC Symbol;Acc:HGNC:10822]	0.744644
RTL6	retrotransposon Gag like 6 [Source:HGNC Symbol;Acc:HGNC:13343]	0.743684
OSM	oncostatin M [Source:HGNC Symbol;Acc:HGNC:8506]	0.743173
WDR31	WD repeat domain 31 [Source:HGNC Symbol;Acc:HGNC:21421]	0.742307
LIF	LIF interleukin 6 family cytokine [Source:HGNC Symbol;Acc:HGNC:6596]	0.741985
CCDC57	coiled-coil domain containing 57 [Source:HGNC Symbol;Acc:HGNC:27564]	0.740458
CATIP	ciliogenesis associated TTC17 interacting protein [Source:HGNC Symbol;Acc:HGNC:25062]	0.739789
SARS1	seryl-tRNA synthetase 1 [Source:HGNC Symbol;Acc:HGNC:10537]	0.739764
BOLA2B	bolA family member 2B [Source:HGNC Symbol;Acc:HGNC:32479]	0.739623
MB21D2	Mab-21 domain containing 2 [Source:HGNC Symbol;Acc:HGNC:30438]	0.738819
CACNG8	calcium voltage-gated channel auxiliary subunit gamma 8 [Source:HGNC Symbol;Acc:HGNC:13628]	0.738467
HOXA1	homeobox A1 [Source:HGNC Symbol;Acc:HGNC:5099]	0.738069
ZFAS1	ZNFX1 antisense RNA 1 [Source:HGNC Symbol;Acc:HGNC:33101]	0.737992
ATP4A	ATPase H+/K+ transporting subunit alpha [Source:HGNC Symbol;Acc:HGNC:819]	0.73797
GSTM4	glutathione S-transferase mu 4 [Source:HGNC Symbol;Acc:HGNC:4636]	0.736521
CC2D2A	coiled-coil and C2 domain containing 2A [Source:HGNC Symbol;Acc:HGNC:29253]	0.736063
TM6SF1	transmembrane 6 superfamily member 1 [Source:HGNC Symbol;Acc:HGNC:11860]	0.73582
AFDN	afadin, adherens junction formation factor [Source:HGNC Symbol;Acc:HGNC:7137]	0.735817
STOML1	stomatin like 1 [Source:HGNC Symbol;Acc:HGNC:14560]	0.735723
ADGRF1	adhesion G protein-coupled receptor F1 [Source:HGNC Symbol;Acc:HGNC:18990]	0.734849
CRYZL1	crystallin zeta like 1 [Source:HGNC Symbol;Acc:HGNC:2420]	0.734388
FOXP4	forkhead box P4 [Source:HGNC Symbol;Acc:HGNC:20842]	0.733754
CPNE9	copine family member 9 [Source:HGNC Symbol;Acc:HGNC:24336]	0.733634
ZBTB25	zinc finger and BTB domain containing 25 [Source:HGNC Symbol;Acc:HGNC:13112]	0.73338
CLEC2D	C-type lectin domain family 2 member D [Source:HGNC Symbol;Acc:HGNC:14351]	0.733327
PPME1	protein phosphatase methylesterase 1 [Source:HGNC Symbol;Acc:HGNC:30178]	0.732975
AOX1	aldehyde oxidase 1 [Source:HGNC Symbol;Acc:HGNC:553]	0.732948
EFCAB5	EF-hand calcium binding domain 5 [Source:HGNC Symbol;Acc:HGNC:24801]	0.732051
MEF2A	myocyte enhancer factor 2A [Source:HGNC Symbol;Acc:HGNC:6993]	0.731762
MYADML2	myeloid associated differentiation marker like 2 [Source:HGNC Symbol;Acc:HGNC:34548]	0.731522
SLAIN1	SLAIN motif family member 1 [Source:HGNC Symbol;Acc:HGNC:26387]	0.731372
C11orf71	chromosome 11 open reading frame 71 [Source:HGNC Symbol;Acc:HGNC:25937]	0.731311
PSMA6	proteasome 20S subunit alpha 6 [Source:HGNC Symbol;Acc:HGNC:9535]	0.731211
USP18	ubiquitin specific peptidase 18 [Source:HGNC Symbol;Acc:HGNC:12616]	0.730836
NIPA2	NIPA magnesium transporter 2 [Source:HGNC Symbol;Acc:HGNC:17044]	0.730026
MISP	mitotic spindle positioning [Source:HGNC Symbol;Acc:HGNC:27000]	0.729887
SDHAF2	succinate dehydrogenase complex assembly factor 2 [Source:HGNC Symbol;Acc:HGNC:26034]	0.729354
BCKDHB	branched chain keto acid dehydrogenase E1 subunit beta [Source:HGNC Symbol;Acc:HGNC:987]	0.729069
SEC24A	SEC24 homolog A, COPII coat complex component [Source:HGNC Symbol;Acc:HGNC:10703]	0.727986
SNAPC1	small nuclear RNA activating complex polypeptide 1 [Source:HGNC Symbol;Acc:HGNC:11134]	0.727631
TAGLN2	transgelin 2 [Source:HGNC Symbol;Acc:HGNC:11554]	0.727388
CRIP1	cysteine rich protein 1 [Source:HGNC Symbol;Acc:HGNC:2360]	0.727126
SHPK	sedoheptulokinase [Source:HGNC Symbol;Acc:HGNC:1492]	0.726979
SLC39A2	solute carrier family 39 member 2 [Source:HGNC Symbol;Acc:HGNC:17127]	0.726496
RPH3A	rabphilin 3A [Source:HGNC Symbol;Acc:HGNC:17056]	0.726352
EFNA4	ephrin A4 [Source:HGNC Symbol;Acc:HGNC:3224]	0.725922
SAV1	salvador family WW domain containing protein 1 [Source:HGNC Symbol;Acc:HGNC:17795]	0.725171
GBP4	guanylate binding protein 4 [Source:HGNC Symbol;Acc:HGNC:20480]	0.723267
FGD2	FYVE, RhoGEF and PH domain containing 2 [Source:HGNC Symbol;Acc:HGNC:3664]	0.722071
ARNT2	aryl hydrocarbon receptor nuclear translocator 2 [Source:HGNC Symbol;Acc:HGNC:16876]	0.721688
CYYR1	cysteine and tyrosine rich 1 [Source:HGNC Symbol;Acc:HGNC:16274]	0.721688
FOXP2	forkhead box P2 [Source:HGNC Symbol;Acc:HGNC:13875]	0.721688
C7orf31	chromosome 7 open reading frame 31 [Source:HGNC Symbol;Acc:HGNC:21722]	0.721688
ELMOD3	ELMO domain containing 3 [Source:HGNC Symbol;Acc:HGNC:26158]	0.721322
PTPRU	protein tyrosine phosphatase receptor type U [Source:HGNC Symbol;Acc:HGNC:9683]	0.721006
CALR3	calreticulin 3 [Source:HGNC Symbol;Acc:HGNC:20407]	0.720581
F8	coagulation factor VIII [Source:HGNC Symbol;Acc:HGNC:3546]	0.719512
BTBD3	BTB domain containing 3 [Source:HGNC Symbol;Acc:HGNC:15854]	0.719413
UPRT	uracil phosphoribosyltransferase homolog [Source:HGNC Symbol;Acc:HGNC:28334]	0.719394
RAP1GAP2	RAP1 GTPase activating protein 2 [Source:HGNC Symbol;Acc:HGNC:29176]	0.719258
ERN1	endoplasmic reticulum to nucleus signaling 1 [Source:HGNC Symbol;Acc:HGNC:3449]	0.718861
PSPH	phosphoserine phosphatase [Source:HGNC Symbol;Acc:HGNC:9577]	0.718539
TINAGL1	tubulointerstitial nephritis antigen like 1 [Source:HGNC Symbol;Acc:HGNC:19168]	0.718428
SPACA9	sperm acrosome associated 9 [Source:HGNC Symbol;Acc:HGNC:1367]	0.718299
ACAD11	acyl-CoA dehydrogenase family member 11 [Source:HGNC Symbol;Acc:HGNC:30211]	0.718097
TTC12	tetratricopeptide repeat domain 12 [Source:HGNC Symbol;Acc:HGNC:23700]	0.718039
EFCAB8	EF-hand calcium binding domain 8 [Source:HGNC Symbol;Acc:HGNC:34532]	0.718032
GSTM3	glutathione S-transferase mu 3 [Source:HGNC Symbol;Acc:HGNC:4635]	0.717944
CELSR3	cadherin EGF LAG seven-pass G-type receptor 3 [Source:HGNC Symbol;Acc:HGNC:3230]	0.717905
SHF	Src homology 2 domain containing F [Source:HGNC Symbol;Acc:HGNC:25116]	0.717851
S100A5	S100 calcium binding protein A5 [Source:HGNC Symbol;Acc:HGNC:10495]	0.717662
RNASEH2C	ribonuclease H2 subunit C [Source:HGNC Symbol;Acc:HGNC:24116]	0.717508
NRN1	neuritin 1 [Source:HGNC Symbol;Acc:HGNC:17972]	0.717267
CLEC4E	C-type lectin domain family 4 member E [Source:HGNC Symbol;Acc:HGNC:14555]	0.717219
GLUL	glutamate-ammonia ligase [Source:HGNC Symbol;Acc:HGNC:4341]	0.717173
RPL14	ribosomal protein L14 [Source:HGNC Symbol;Acc:HGNC:10305]	0.716666
CRYBB1	crystallin beta B1 [Source:HGNC Symbol;Acc:HGNC:2397]	0.71653
CCT6B	chaperonin containing TCP1 subunit 6B [Source:HGNC Symbol;Acc:HGNC:1621]	0.716263
TOP1MT	DNA topoisomerase I mitochondrial [Source:HGNC Symbol;Acc:HGNC:29787]	0.716258
ACOT8	acyl-CoA thioesterase 8 [Source:HGNC Symbol;Acc:HGNC:15919]	0.715945
SLC7A13	solute carrier family 7 member 13 [Source:HGNC Symbol;Acc:HGNC:23092]	0.715142
LGALS2	galectin 2 [Source:HGNC Symbol;Acc:HGNC:6562]	0.714943
CDS2	CDP-diacylglycerol synthase 2 [Source:HGNC Symbol;Acc:HGNC:1801]	0.714821
VOPP1	VOPP1 WW domain binding protein [Source:HGNC Symbol;Acc:HGNC:34518]	0.714687
ABCC9	ATP binding cassette subfamily C member 9 [Source:HGNC Symbol;Acc:HGNC:60]	0.714286
LARP1B	La ribonucleoprotein 1B [Source:HGNC Symbol;Acc:HGNC:24704]	0.714237
COL3A1	collagen type III alpha 1 chain [Source:HGNC Symbol;Acc:HGNC:2201]	0.714143
MXRA7	matrix remodeling associated 7 [Source:HGNC Symbol;Acc:HGNC:7541]	0.714135
TATDN3	TatD DNase domain containing 3 [Source:HGNC Symbol;Acc:HGNC:27010]	0.713918
SLFN5	schlafen family member 5 [Source:HGNC Symbol;Acc:HGNC:28286]	0.713584
GSDME	gasdermin E [Source:HGNC Symbol;Acc:HGNC:2810]	0.71316
EDNRB	endothelin receptor type B [Source:HGNC Symbol;Acc:HGNC:3180]	0.712792
KIF21B	kinesin family member 21B [Source:HGNC Symbol;Acc:HGNC:29442]	0.712676
GRIN2C	glutamate ionotropic receptor NMDA type subunit 2C [Source:HGNC Symbol;Acc:HGNC:4587]	0.712631
C11orf65	chromosome 11 open reading frame 65 [Source:HGNC Symbol;Acc:HGNC:28519]	0.712455
BRAF	B-Raf proto-oncogene, serine/threonine kinase [Source:HGNC Symbol;Acc:HGNC:1097]	0.712329
PGP	phosphoglycolate phosphatase [Source:HGNC Symbol;Acc:HGNC:8909]	0.711991
EHHADH	enoyl-CoA hydratase and 3-hydroxyacyl CoA dehydrogenase [Source:HGNC Symbol;Acc:HGNC:3247]	0.710779
GALNT2	polypeptide N-acetylgalactosaminyltransferase 2 [Source:HGNC Symbol;Acc:HGNC:4124]	0.709733
ZEB1	zinc finger E-box binding homeobox 1 [Source:HGNC Symbol;Acc:HGNC:11642]	0.708142
LLGL1	LLGL scribble cell polarity complex component 1 [Source:HGNC Symbol;Acc:HGNC:6628]	0.707886
CD300E	CD300e molecule [Source:HGNC Symbol;Acc:HGNC:28874]	0.706589
ITGAE	integrin subunit alpha E [Source:HGNC Symbol;Acc:HGNC:6147]	0.706416
GABPB1	GA binding protein transcription factor subunit beta 1 [Source:HGNC Symbol;Acc:HGNC:4074]	0.706056
ACOT4	acyl-CoA thioesterase 4 [Source:HGNC Symbol;Acc:HGNC:19748]	0.70565
DTX3L	deltex E3 ubiquitin ligase 3L [Source:HGNC Symbol;Acc:HGNC:30323]	0.705156
SEPTIN3	septin 3 [Source:HGNC Symbol;Acc:HGNC:10750]	0.705062
MANSC1	MANSC domain containing 1 [Source:HGNC Symbol;Acc:HGNC:25505]	0.704615
PPP1R15B	protein phosphatase 1 regulatory subunit 15B [Source:HGNC Symbol;Acc:HGNC:14951]	0.703899
ULK4	unc-51 like kinase 4 [Source:HGNC Symbol;Acc:HGNC:15784]	0.703778
GLIPR1L1	GLIPR1 like 1 [Source:HGNC Symbol;Acc:HGNC:28392]	0.703733
CREB3L4	cAMP responsive element binding protein 3 like 4 [Source:HGNC Symbol;Acc:HGNC:18854]	0.703452
TGFB3	transforming growth factor beta 3 [Source:HGNC Symbol;Acc:HGNC:11769]	0.702935
C19orf85	chromosome 19 open reading frame 85 [Source:HGNC Symbol;Acc:HGNC:53653]	0.702736
ODC1	ornithine decarboxylase 1 [Source:HGNC Symbol;Acc:HGNC:8109]	0.700876
WTIP	WT1 interacting protein [Source:HGNC Symbol;Acc:HGNC:20964]	0.699939
MEOX1	mesenchyme homeobox 1 [Source:HGNC Symbol;Acc:HGNC:7013]	0.699901
CCDC62	coiled-coil domain containing 62 [Source:HGNC Symbol;Acc:HGNC:30723]	0.69813
GRK3	G protein-coupled receptor kinase 3 [Source:HGNC Symbol;Acc:HGNC:290]	0.696798
LYRM1	LYR motif containing 1 [Source:HGNC Symbol;Acc:HGNC:25074]	0.696671
NFAM1	NFAT activating protein with ITAM motif 1 [Source:HGNC Symbol;Acc:HGNC:29872]	0.696237
SH2B2	SH2B adaptor protein 2 [Source:HGNC Symbol;Acc:HGNC:17381]	0.696203
VGLL4	vestigial like family member 4 [Source:HGNC Symbol;Acc:HGNC:28966]	0.695879
SBSN	suprabasin [Source:HGNC Symbol;Acc:HGNC:24950]	0.695789
CCL22	C-C motif chemokine ligand 22 [Source:HGNC Symbol;Acc:HGNC:10621]	0.695662
PHF10	PHD finger protein 10 [Source:HGNC Symbol;Acc:HGNC:18250]	0.694145
XKRX	XK related X-linked [Source:HGNC Symbol;Acc:HGNC:29845]	0.694089
STXBP6	syntaxin binding protein 6 [Source:HGNC Symbol;Acc:HGNC:19666]	0.693919
TRIM5	tripartite motif containing 5 [Source:HGNC Symbol;Acc:HGNC:16276]	0.693877
CCDC107	coiled-coil domain containing 107 [Source:HGNC Symbol;Acc:HGNC:28465]	0.693253
TRARG1	trafficking regulator of GLUT4 (SLC2A4) 1 [Source:HGNC Symbol;Acc:HGNC:29592]	0.692963
RPL3L	ribosomal protein L3 like [Source:HGNC Symbol;Acc:HGNC:10351]	0.692588
EFHC1	EF-hand domain containing 1 [Source:HGNC Symbol;Acc:HGNC:16406]	0.69256
PCYOX1	prenylcysteine oxidase 1 [Source:HGNC Symbol;Acc:HGNC:20588]	0.692443
TSTD3	thiosulfate sulfurtransferase like domain containing 3 [Source:HGNC Symbol;Acc:HGNC:40910]	0.69121
DMXL2	Dmx like 2 [Source:HGNC Symbol;Acc:HGNC:2938]	0.691116
SPAG6	sperm associated antigen 6 [Source:HGNC Symbol;Acc:HGNC:11215]	0.69102
ASRGL1	asparaginase and isoaspartyl peptidase 1 [Source:HGNC Symbol;Acc:HGNC:16448]	0.690298
PDIA4	protein disulfide isomerase family A member 4 [Source:HGNC Symbol;Acc:HGNC:30167]	0.690295
DCST2	DC-STAMP domain containing 2 [Source:HGNC Symbol;Acc:HGNC:26562]	0.690071
GABBR1	gamma-aminobutyric acid type B receptor subunit 1 [Source:HGNC Symbol;Acc:HGNC:4070]	0.689555
CLEC6A	C-type lectin domain containing 6A [Source:HGNC Symbol;Acc:HGNC:14556]	0.68946
ISG20	interferon stimulated exonuclease gene 20 [Source:HGNC Symbol;Acc:HGNC:6130]	0.688897
SNUPN	snurportin 1 [Source:HGNC Symbol;Acc:HGNC:14245]	0.688811
IFNAR2	interferon alpha and beta receptor subunit 2 [Source:HGNC Symbol;Acc:HGNC:5433]	0.688488
ZFAND1	zinc finger AN1-type containing 1 [Source:HGNC Symbol;Acc:HGNC:25858]	0.688344
NEU3	neuraminidase 3 [Source:HGNC Symbol;Acc:HGNC:7760]	0.688226
DPH7	diphthamide biosynthesis 7 [Source:HGNC Symbol;Acc:HGNC:25199]	0.688033
CNPY4	canopy FGF signaling regulator 4 [Source:HGNC Symbol;Acc:HGNC:28631]	0.68749
PAMR1	peptidase domain containing associated with muscle regeneration 1 [Source:HGNC Symbol;Acc:HGNC:24554]	0.687306
HFE	homeostatic iron regulator [Source:HGNC Symbol;Acc:HGNC:4886]	0.687207
TM2D2	TM2 domain containing 2 [Source:HGNC Symbol;Acc:HGNC:24127]	0.684472
MAP4K2	mitogen-activated protein kinase kinase kinase kinase 2 [Source:HGNC Symbol;Acc:HGNC:6864]	0.684322
BZW2	basic leucine zipper and W2 domains 2 [Source:HGNC Symbol;Acc:HGNC:18808]	0.684115
RPS9	ribosomal protein S9 [Source:HGNC Symbol;Acc:HGNC:10442]	0.683981
SLC25A2	solute carrier family 25 member 2 [Source:HGNC Symbol;Acc:HGNC:22921]	0.683705
NXNL1	nucleoredoxin like 1 [Source:HGNC Symbol;Acc:HGNC:25179]	0.683589
BHLHA15	basic helix-loop-helix family member a15 [Source:HGNC Symbol;Acc:HGNC:22265]	0.68335
OAS1	2'-5'-oligoadenylate synthetase 1 [Source:HGNC Symbol;Acc:HGNC:8086]	0.68309
AMBP	alpha-1-microglobulin/bikunin precursor [Source:HGNC Symbol;Acc:HGNC:453]	0.682946
TCIM	transcriptional and immune response regulator [Source:HGNC Symbol;Acc:HGNC:1357]	0.682323
GCNT1	glucosaminyl (N-acetyl) transferase 1 [Source:HGNC Symbol;Acc:HGNC:4203]	0.680801
TTLL13P	tubulin tyrosine ligase like 13, pseudogene [Source:HGNC Symbol;Acc:HGNC:32484]	0.680794
DNAJC4	DnaJ heat shock protein family (Hsp40) member C4 [Source:HGNC Symbol;Acc:HGNC:5271]	0.680747
TGFBR3L	transforming growth factor beta receptor 3 like [Source:HGNC Symbol;Acc:HGNC:44152]	0.680079
ANOS1	anosmin 1 [Source:HGNC Symbol;Acc:HGNC:6211]	0.678273
TLE5	TLE family member 5, transcriptional modulator [Source:HGNC Symbol;Acc:HGNC:307]	0.678224
CEP162	centrosomal protein 162 [Source:HGNC Symbol;Acc:HGNC:21107]	0.678137
OAF	out at first homolog [Source:HGNC Symbol;Acc:HGNC:28752]	0.678133
RHBDD2	rhomboid domain containing 2 [Source:HGNC Symbol;Acc:HGNC:23082]	0.678098
SNORD34	small nucleolar RNA, C/D box 34 [Source:HGNC Symbol;Acc:HGNC:10161]	0.678039
CA11	carbonic anhydrase 11 [Source:HGNC Symbol;Acc:HGNC:1370]	0.677774
RPL6	ribosomal protein L6 [Source:HGNC Symbol;Acc:HGNC:10362]	0.676663
NNMT	nicotinamide N-methyltransferase [Source:HGNC Symbol;Acc:HGNC:7861]	0.676412
SLC25A39	solute carrier family 25 member 39 [Source:HGNC Symbol;Acc:HGNC:24279]	0.675702
MYRF	myelin regulatory factor [Source:HGNC Symbol;Acc:HGNC:1181]	0.675043
NFKBIE	NFKB inhibitor epsilon [Source:HGNC Symbol;Acc:HGNC:7799]	0.674142
SFXN5	sideroflexin 5 [Source:HGNC Symbol;Acc:HGNC:16073]	0.673746
BSG	basigin (Ok blood group) [Source:HGNC Symbol;Acc:HGNC:1116]	0.672845
DKKL1	dickkopf like acrosomal protein 1 [Source:HGNC Symbol;Acc:HGNC:16528]	0.672028
STX11	syntaxin 11 [Source:HGNC Symbol;Acc:HGNC:11429]	0.671975
APBA3	amyloid beta precursor protein binding family A member 3 [Source:HGNC Symbol;Acc:HGNC:580]	0.671344
LGALSL	galectin like [Source:HGNC Symbol;Acc:HGNC:25012]	0.671141
DOCK6	dedicator of cytokinesis 6 [Source:HGNC Symbol;Acc:HGNC:19189]	0.670771
ABHD14A	abhydrolase domain containing 14A [Source:HGNC Symbol;Acc:HGNC:24538]	0.669092
FBXO17	F-box protein 17 [Source:HGNC Symbol;Acc:HGNC:18754]	0.668612
DZIP1	DAZ interacting zinc finger protein 1 [Source:HGNC Symbol;Acc:HGNC:20908]	0.668608
EFEMP2	EGF containing fibulin extracellular matrix protein 2 [Source:HGNC Symbol;Acc:HGNC:3219]	0.668567
HDDC3	HD domain containing 3 [Source:HGNC Symbol;Acc:HGNC:30522]	0.668488
ERGIC1	endoplasmic reticulum-golgi intermediate compartment 1 [Source:HGNC Symbol;Acc:HGNC:29205]	0.668103
MEF2B	myocyte enhancer factor 2B [Source:HGNC Symbol;Acc:HGNC:6995]	0.667462
EMILIN1	elastin microfibril interfacer 1 [Source:HGNC Symbol;Acc:HGNC:19880]	0.667121
SLC43A3	solute carrier family 43 member 3 [Source:HGNC Symbol;Acc:HGNC:17466]	0.666682
C9orf50	chromosome 9 open reading frame 50 [Source:HGNC Symbol;Acc:HGNC:23677]	0.666667
CBLN3	cerebellin 3 precursor [Source:HGNC Symbol;Acc:HGNC:20146]	0.666383
FYCO1	FYVE and coiled-coil domain autophagy adaptor 1 [Source:HGNC Symbol;Acc:HGNC:14673]	0.665954
C1orf54	chromosome 1 open reading frame 54 [Source:HGNC Symbol;Acc:HGNC:26258]	0.665801
RGSL1	regulator of G protein signaling like 1 [Source:HGNC Symbol;Acc:HGNC:18636]	0.665169
DENND2D	DENN domain containing 2D [Source:HGNC Symbol;Acc:HGNC:26192]	0.664797
C11orf96	chromosome 11 open reading frame 96 [Source:HGNC Symbol;Acc:HGNC:38675]	0.66474
SMTNL2	smoothelin like 2 [Source:HGNC Symbol;Acc:HGNC:24764]	0.663856
RAB3A	RAB3A, member RAS oncogene family [Source:HGNC Symbol;Acc:HGNC:9777]	0.663807
MSRB1	methionine sulfoxide reductase B1 [Source:HGNC Symbol;Acc:HGNC:14133]	0.66333
GEMIN2	gem nuclear organelle associated protein 2 [Source:HGNC Symbol;Acc:HGNC:10884]	0.662828
HACD4	3-hydroxyacyl-CoA dehydratase 4 [Source:HGNC Symbol;Acc:HGNC:20920]	0.662187
POLD4	DNA polymerase delta 4, accessory subunit [Source:HGNC Symbol;Acc:HGNC:14106]	0.66137
CBX6	chromobox 6 [Source:HGNC Symbol;Acc:HGNC:1556]	0.660671
SAG	S-antigen visual arrestin [Source:HGNC Symbol;Acc:HGNC:10521]	0.659484
XKR6	XK related 6 [Source:HGNC Symbol;Acc:HGNC:27806]	0.659407
GRAMD2A	GRAM domain containing 2A [Source:HGNC Symbol;Acc:HGNC:27287]	0.659391
ZBTB7B	zinc finger and BTB domain containing 7B [Source:HGNC Symbol;Acc:HGNC:18668]	0.659147
TAPT1	transmembrane anterior posterior transformation 1 [Source:HGNC Symbol;Acc:HGNC:26887]	0.658698
PACSIN2	protein kinase C and casein kinase substrate in neurons 2 [Source:HGNC Symbol;Acc:HGNC:8571]	0.658327
IL2RG	interleukin 2 receptor subunit gamma [Source:HGNC Symbol;Acc:HGNC:6010]	0.658169
IRX5	iroquois homeobox 5 [Source:HGNC Symbol;Acc:HGNC:14361]	0.658092
CUBN	cubilin [Source:HGNC Symbol;Acc:HGNC:2548]	0.657616
AMOT	angiomotin [Source:HGNC Symbol;Acc:HGNC:17810]	0.657282
ZNF354C	zinc finger protein 354C [Source:HGNC Symbol;Acc:HGNC:16736]	0.656835
CTDSPL	CTD small phosphatase like [Source:HGNC Symbol;Acc:HGNC:16890]	0.656748
CASTOR2	cytosolic arginine sensor for mTORC1 subunit 2 [Source:HGNC Symbol;Acc:HGNC:37073]	0.656644
DDI2	DNA damage inducible 1 homolog 2 [Source:HGNC Symbol;Acc:HGNC:24578]	0.656401
NISCH	nischarin [Source:HGNC Symbol;Acc:HGNC:18006]	0.656126
MAFF	MAF bZIP transcription factor F [Source:HGNC Symbol;Acc:HGNC:6780]	0.656042
TALDO1	transaldolase 1 [Source:HGNC Symbol;Acc:HGNC:11559]	0.655678
APOF	apolipoprotein F [Source:HGNC Symbol;Acc:HGNC:615]	0.655509
RPS16	ribosomal protein S16 [Source:HGNC Symbol;Acc:HGNC:10396]	0.655316
ACSF3	acyl-CoA synthetase family member 3 [Source:HGNC Symbol;Acc:HGNC:27288]	0.655216
TMEM8B	transmembrane protein 8B [Source:HGNC Symbol;Acc:HGNC:21427]	0.655185
TBL1X	transducin beta like 1 X-linked [Source:HGNC Symbol;Acc:HGNC:11585]	0.655115
RHPN2	rhophilin Rho GTPase binding protein 2 [Source:HGNC Symbol;Acc:HGNC:19974]	0.65468
A3GALT2	alpha 1,3-galactosyltransferase 2 [Source:HGNC Symbol;Acc:HGNC:30005]	0.65468
CCDC73	coiled-coil domain containing 73 [Source:HGNC Symbol;Acc:HGNC:23261]	0.654438
GLB1L2	galactosidase beta 1 like 2 [Source:HGNC Symbol;Acc:HGNC:25129]	0.653955
PLA2G3	phospholipase A2 group III [Source:HGNC Symbol;Acc:HGNC:17934]	0.653768
LANCL3	LanC like 3 [Source:HGNC Symbol;Acc:HGNC:24767]	0.653328
KIAA0895	KIAA0895 [Source:HGNC Symbol;Acc:HGNC:22206]	0.653328
DPY19L1	dpy-19 like C-mannosyltransferase 1 [Source:HGNC Symbol;Acc:HGNC:22205]	0.652497
SDK2	sidekick cell adhesion molecule 2 [Source:HGNC Symbol;Acc:HGNC:19308]	0.652055
NEK9	NIMA related kinase 9 [Source:HGNC Symbol;Acc:HGNC:18591]	0.651957
TG	thyroglobulin [Source:HGNC Symbol;Acc:HGNC:11764]	0.65118
HIVEP1	HIVEP zinc finger 1 [Source:HGNC Symbol;Acc:HGNC:4920]	0.650063
MIEF2	mitochondrial elongation factor 2 [Source:HGNC Symbol;Acc:HGNC:17920]	0.649863
DDHD1	DDHD domain containing 1 [Source:HGNC Symbol;Acc:HGNC:19714]	0.649809
CDKN2D	cyclin dependent kinase inhibitor 2D [Source:HGNC Symbol;Acc:HGNC:1790]	0.649651
STAT3	signal transducer and activator of transcription 3 [Source:HGNC Symbol;Acc:HGNC:11364]	0.649477
GLP2R	glucagon like peptide 2 receptor [Source:HGNC Symbol;Acc:HGNC:4325]	0.649383
SRL	sarcalumenin [Source:HGNC Symbol;Acc:HGNC:11295]	0.649153
RASAL2	RAS protein activator like 2 [Source:HGNC Symbol;Acc:HGNC:9874]	0.648851
FAM102B	family with sequence similarity 102 member B [Source:HGNC Symbol;Acc:HGNC:27637]	0.647602
IRF7	interferon regulatory factor 7 [Source:HGNC Symbol;Acc:HGNC:6122]	0.64674
CFAP45	cilia and flagella associated protein 45 [Source:HGNC Symbol;Acc:HGNC:17229]	0.646327
PCNX2	pecanex 2 [Source:HGNC Symbol;Acc:HGNC:8736]	0.644976
STC1	stanniocalcin 1 [Source:HGNC Symbol;Acc:HGNC:11373]	0.644952
MED21	mediator complex subunit 21 [Source:HGNC Symbol;Acc:HGNC:11473]	0.644611
MROH2A	maestro heat like repeat family member 2A [Source:HGNC Symbol;Acc:HGNC:27936]	0.644172
PLOD3	procollagen-lysine,2-oxoglutarate 5-dioxygenase 3 [Source:HGNC Symbol;Acc:HGNC:9083]	0.64398
RABEPK	Rab9 effector protein with kelch motifs [Source:HGNC Symbol;Acc:HGNC:16896]	0.643825
MFSD9	major facilitator superfamily domain containing 9 [Source:HGNC Symbol;Acc:HGNC:28158]	0.642667
GRINA	glutamate ionotropic receptor NMDA type subunit associated protein 1 [Source:HGNC Symbol;Acc:HGNC:4589]	0.642451
ZBTB3	zinc finger and BTB domain containing 3 [Source:HGNC Symbol;Acc:HGNC:22918]	0.642186
ACACB	acetyl-CoA carboxylase beta [Source:HGNC Symbol;Acc:HGNC:85]	0.641441
ZCWPW1	zinc finger CW-type and PWWP domain containing 1 [Source:HGNC Symbol;Acc:HGNC:23486]	0.641218
ADIPOR2	adiponectin receptor 2 [Source:HGNC Symbol;Acc:HGNC:24041]	0.640953
HK1	hexokinase 1 [Source:HGNC Symbol;Acc:HGNC:4922]	0.640587
SUN1	Sad1 and UNC84 domain containing 1 [Source:HGNC Symbol;Acc:HGNC:18587]	0.63977
RFX5	regulatory factor X5 [Source:HGNC Symbol;Acc:HGNC:9986]	0.639198
FXYD4	FXYD domain containing ion transport regulator 4 [Source:HGNC Symbol;Acc:HGNC:4028]	0.638445
PROS1	protein S [Source:HGNC Symbol;Acc:HGNC:9456]	0.637982
PTPN1	protein tyrosine phosphatase non-receptor type 1 [Source:HGNC Symbol;Acc:HGNC:9642]	0.637844
NIPAL4	NIPA like domain containing 4 [Source:HGNC Symbol;Acc:HGNC:28018]	0.637516
SLC16A1	solute carrier family 16 member 1 [Source:HGNC Symbol;Acc:HGNC:10922]	0.63745
TMEM132B	transmembrane protein 132B [Source:HGNC Symbol;Acc:HGNC:29397]	0.635655
SEPTIN10	septin 10 [Source:HGNC Symbol;Acc:HGNC:14349]	0.635525
PAWR	pro-apoptotic WT1 regulator [Source:HGNC Symbol;Acc:HGNC:8614]	0.634734
CRY2	cryptochrome circadian regulator 2 [Source:HGNC Symbol;Acc:HGNC:2385]	0.634058
NUTM1	NUT midline carcinoma family member 1 [Source:HGNC Symbol;Acc:HGNC:29919]	0.63345
MARK4	microtubule affinity regulating kinase 4 [Source:HGNC Symbol;Acc:HGNC:13538]	0.633417
UQCRQ	ubiquinol-cytochrome c reductase complex III subunit VII [Source:HGNC Symbol;Acc:HGNC:29594]	0.633211
P2RX1	purinergic receptor P2X 1 [Source:HGNC Symbol;Acc:HGNC:8533]	0.633097
SRD5A1	steroid 5 alpha-reductase 1 [Source:HGNC Symbol;Acc:HGNC:11284]	0.632999
DAGLA	diacylglycerol lipase alpha [Source:HGNC Symbol;Acc:HGNC:1165]	0.632998
SYNPO2	synaptopodin 2 [Source:HGNC Symbol;Acc:HGNC:17732]	0.63282
GAREM1	GRB2 associated regulator of MAPK1 subtype 1 [Source:HGNC Symbol;Acc:HGNC:26136]	0.632245
AKT3	AKT serine/threonine kinase 3 [Source:HGNC Symbol;Acc:HGNC:393]	0.632196
IQCG	IQ motif containing G [Source:HGNC Symbol;Acc:HGNC:25251]	0.632135
MRPS16	mitochondrial ribosomal protein S16 [Source:HGNC Symbol;Acc:HGNC:14048]	0.632124
NOXRED1	NADP dependent oxidoreductase domain containing 1 [Source:HGNC Symbol;Acc:HGNC:20487]	0.632053
BATF	basic leucine zipper ATF-like transcription factor [Source:HGNC Symbol;Acc:HGNC:958]	0.631758
OVOL1	ovo like transcriptional repressor 1 [Source:HGNC Symbol;Acc:HGNC:8525]	0.63173
GUCA1A	guanylate cyclase activator 1A [Source:HGNC Symbol;Acc:HGNC:4678]	0.631642
PKIB	cAMP-dependent protein kinase inhibitor beta [Source:HGNC Symbol;Acc:HGNC:9018]	0.63144
C5orf63	chromosome 5 open reading frame 63 [Source:HGNC Symbol;Acc:HGNC:40051]	0.631428
UNC45A	unc-45 myosin chaperone A [Source:HGNC Symbol;Acc:HGNC:30594]	0.631393
SPATA7	spermatogenesis associated 7 [Source:HGNC Symbol;Acc:HGNC:20423]	0.630631
ID1	inhibitor of DNA binding 1, HLH protein [Source:HGNC Symbol;Acc:HGNC:5360]	0.630308
ADH7	alcohol dehydrogenase 7 (class IV), mu or sigma polypeptide [Source:HGNC Symbol;Acc:HGNC:256]	0.629837
PHF21A	PHD finger protein 21A [Source:HGNC Symbol;Acc:HGNC:24156]	0.629835
STK40	serine/threonine kinase 40 [Source:HGNC Symbol;Acc:HGNC:21373]	0.629411
EFHB	EF-hand domain family member B [Source:HGNC Symbol;Acc:HGNC:26330]	0.62938
RAB11FIP1	RAB11 family interacting protein 1 [Source:HGNC Symbol;Acc:HGNC:30265]	0.629195
SUGCT	succinyl-CoA:glutarate-CoA transferase [Source:HGNC Symbol;Acc:HGNC:16001]	0.628825
CH25H	cholesterol 25-hydroxylase [Source:HGNC Symbol;Acc:HGNC:1907]	0.628627
FAM221A	family with sequence similarity 221 member A [Source:HGNC Symbol;Acc:HGNC:27977]	0.628492
CBX7	chromobox 7 [Source:HGNC Symbol;Acc:HGNC:1557]	0.628455
STOX2	storkhead box 2 [Source:HGNC Symbol;Acc:HGNC:25450]	0.62783
CCDC171	coiled-coil domain containing 171 [Source:HGNC Symbol;Acc:HGNC:29828]	0.627062
NR2F6	nuclear receptor subfamily 2 group F member 6 [Source:HGNC Symbol;Acc:HGNC:7977]	0.626347
N4BP1	NEDD4 binding protein 1 [Source:HGNC Symbol;Acc:HGNC:29850]	0.62605
IMPG2	interphotoreceptor matrix proteoglycan 2 [Source:HGNC Symbol;Acc:HGNC:18362]	0.625
MAP2K6	mitogen-activated protein kinase kinase 6 [Source:HGNC Symbol;Acc:HGNC:6846]	0.624974
LRRC46	leucine rich repeat containing 46 [Source:HGNC Symbol;Acc:HGNC:25047]	0.624773
HSF2BP	heat shock transcription factor 2 binding protein [Source:HGNC Symbol;Acc:HGNC:5226]	0.624276
ARAP2	ArfGAP with RhoGAP domain, ankyrin repeat and PH domain 2 [Source:HGNC Symbol;Acc:HGNC:16924]	0.624255
CRYGA	crystallin gamma A [Source:HGNC Symbol;Acc:HGNC:2408]	0.623564
SLC25A36	solute carrier family 25 member 36 [Source:HGNC Symbol;Acc:HGNC:25554]	0.622915
GALNT3	polypeptide N-acetylgalactosaminyltransferase 3 [Source:HGNC Symbol;Acc:HGNC:4125]	0.622458
DHRS1	dehydrogenase/reductase 1 [Source:HGNC Symbol;Acc:HGNC:16445]	0.621975
COX4I2	cytochrome c oxidase subunit 4I2 [Source:HGNC Symbol;Acc:HGNC:16232]	0.6219
LRG1	leucine rich alpha-2-glycoprotein 1 [Source:HGNC Symbol;Acc:HGNC:29480]	0.621247
FXYD3	FXYD domain containing ion transport regulator 3 [Source:HGNC Symbol;Acc:HGNC:4027]	0.621078
ZFYVE19	zinc finger FYVE-type containing 19 [Source:HGNC Symbol;Acc:HGNC:20758]	0.620699
ADGRL4	adhesion G protein-coupled receptor L4 [Source:HGNC Symbol;Acc:HGNC:20822]	0.620566
ZYX	zyxin [Source:HGNC Symbol;Acc:HGNC:13200]	0.620153
MTMR3	myotubularin related protein 3 [Source:HGNC Symbol;Acc:HGNC:7451]	0.619506
LGALS3BP	galectin 3 binding protein [Source:HGNC Symbol;Acc:HGNC:6564]	0.61941
KXD1	KxDL motif containing 1 [Source:HGNC Symbol;Acc:HGNC:28420]	0.6194
NPHS2	NPHS2 stomatin family member, podocin [Source:HGNC Symbol;Acc:HGNC:13394]	0.618802
GANC	glucosidase alpha, neutral C [Source:HGNC Symbol;Acc:HGNC:4139]	0.618525
TMEM134	transmembrane protein 134 [Source:HGNC Symbol;Acc:HGNC:26142]	0.618293
RAB3IP	RAB3A interacting protein [Source:HGNC Symbol;Acc:HGNC:16508]	0.61828
MAP3K8	mitogen-activated protein kinase kinase kinase 8 [Source:HGNC Symbol;Acc:HGNC:6860]	0.618118
METTL21C	methyltransferase like 21C [Source:HGNC Symbol;Acc:HGNC:33717]	0.617977
HERC4	HECT and RLD domain containing E3 ubiquitin protein ligase 4 [Source:HGNC Symbol;Acc:HGNC:24521]	0.617807
P2RY12	purinergic receptor P2Y12 [Source:HGNC Symbol;Acc:HGNC:18124]	0.617433
CHP1	calcineurin like EF-hand protein 1 [Source:HGNC Symbol;Acc:HGNC:17433]	0.616873
RNF141	ring finger protein 141 [Source:HGNC Symbol;Acc:HGNC:21159]	0.616722
BMF	Bcl2 modifying factor [Source:HGNC Symbol;Acc:HGNC:24132]	0.616718
RTL8A	retrotransposon Gag like 8A [Source:HGNC Symbol;Acc:HGNC:24514]	0.616345
GSTCD	glutathione S-transferase C-terminal domain containing [Source:HGNC Symbol;Acc:HGNC:25806]	0.616161
RNF166	ring finger protein 166 [Source:HGNC Symbol;Acc:HGNC:28856]	0.615997
ENDOG	endonuclease G [Source:HGNC Symbol;Acc:HGNC:3346]	0.615791
RPL24	ribosomal protein L24 [Source:HGNC Symbol;Acc:HGNC:10325]	0.615449
CEACAM1	CEA cell adhesion molecule 1 [Source:HGNC Symbol;Acc:HGNC:1814]	0.614822
HSPA8	heat shock protein family A (Hsp70) member 8 [Source:HGNC Symbol;Acc:HGNC:5241]	0.61447
APLN	apelin [Source:HGNC Symbol;Acc:HGNC:16665]	0.614035
CUX2	cut like homeobox 2 [Source:HGNC Symbol;Acc:HGNC:19347]	0.613962
SVIP	small VCP interacting protein [Source:HGNC Symbol;Acc:HGNC:25238]	0.613893
AMT	aminomethyltransferase [Source:HGNC Symbol;Acc:HGNC:473]	0.613852
DEDD2	death effector domain containing 2 [Source:HGNC Symbol;Acc:HGNC:24450]	0.613735
FAM24A	family with sequence similarity 24 member A [Source:HGNC Symbol;Acc:HGNC:23470]	0.613435
ZNF76	zinc finger protein 76 [Source:HGNC Symbol;Acc:HGNC:13149]	0.613244
PTX3	pentraxin 3 [Source:HGNC Symbol;Acc:HGNC:9692]	0.612962
DUS4L	dihydrouridine synthase 4 like [Source:HGNC Symbol;Acc:HGNC:21517]	0.612698
FXYD5	FXYD domain containing ion transport regulator 5 [Source:HGNC Symbol;Acc:HGNC:4029]	0.612569
LYPLAL1	lysophospholipase like 1 [Source:HGNC Symbol;Acc:HGNC:20440]	0.611374
PTPRM	protein tyrosine phosphatase receptor type M [Source:HGNC Symbol;Acc:HGNC:9675]	0.61101
C20orf141	chromosome 20 open reading frame 141 [Source:HGNC Symbol;Acc:HGNC:16134]	0.610554
LMO4	LIM domain only 4 [Source:HGNC Symbol;Acc:HGNC:6644]	0.61001
C19orf38	chromosome 19 open reading frame 38 [Source:HGNC Symbol;Acc:HGNC:34073]	0.609365
IL1R2	interleukin 1 receptor type 2 [Source:HGNC Symbol;Acc:HGNC:5994]	0.608537
RSPO2	R-spondin 2 [Source:HGNC Symbol;Acc:HGNC:28583]	0.608164
SLC27A5	solute carrier family 27 member 5 [Source:HGNC Symbol;Acc:HGNC:10999]	0.608126
ZC3H6	zinc finger CCCH-type containing 6 [Source:HGNC Symbol;Acc:HGNC:24762]	0.607953
CDK20	cyclin dependent kinase 20 [Source:HGNC Symbol;Acc:HGNC:21420]	0.60786
IQGAP3	IQ motif containing GTPase activating protein 3 [Source:HGNC Symbol;Acc:HGNC:20669]	0.607311
TDP1	tyrosyl-DNA phosphodiesterase 1 [Source:HGNC Symbol;Acc:HGNC:18884]	0.607114
SEMA4A	semaphorin 4A [Source:HGNC Symbol;Acc:HGNC:10729]	0.607089
TTYH3	tweety family member 3 [Source:HGNC Symbol;Acc:HGNC:22222]	0.606439
RAC2	Rac family small GTPase 2 [Source:HGNC Symbol;Acc:HGNC:9802]	0.606427
ST6GALNAC6	ST6 N-acetylgalactosaminide alpha-2,6-sialyltransferase 6 [Source:HGNC Symbol;Acc:HGNC:23364]	0.606341
RBMS2	RNA binding motif single stranded interacting protein 2 [Source:HGNC Symbol;Acc:HGNC:9909]	0.605901
STK24	serine/threonine kinase 24 [Source:HGNC Symbol;Acc:HGNC:11403]	0.605382
TRIM6	tripartite motif containing 6 [Source:HGNC Symbol;Acc:HGNC:16277]	0.604719
TYRO3	TYRO3 protein tyrosine kinase [Source:HGNC Symbol;Acc:HGNC:12446]	0.604448
TLCD2	TLC domain containing 2 [Source:HGNC Symbol;Acc:HGNC:33522]	0.604433
CXorf65	chromosome X open reading frame 65 [Source:HGNC Symbol;Acc:HGNC:33713]	0.604156
GFI1B	growth factor independent 1B transcriptional repressor [Source:HGNC Symbol;Acc:HGNC:4238]	0.603318
ASNSD1	asparagine synthetase domain containing 1 [Source:HGNC Symbol;Acc:HGNC:24910]	0.603152
PHF20	PHD finger protein 20 [Source:HGNC Symbol;Acc:HGNC:16098]	0.60117
EGF	epidermal growth factor [Source:HGNC Symbol;Acc:HGNC:3229]	0.601061
ZNF526	zinc finger protein 526 [Source:HGNC Symbol;Acc:HGNC:29415]	0.600682
TMEM89	transmembrane protein 89 [Source:HGNC Symbol;Acc:HGNC:32372]	0.599728
EPB41L3	erythrocyte membrane protein band 4.1 like 3 [Source:HGNC Symbol;Acc:HGNC:3380]	0.599475
BHLHA9	basic helix-loop-helix family member a9 [Source:HGNC Symbol;Acc:HGNC:35126]	0.598558
SYT5	synaptotagmin 5 [Source:HGNC Symbol;Acc:HGNC:11513]	0.598511
PRKAA2	protein kinase AMP-activated catalytic subunit alpha 2 [Source:HGNC Symbol;Acc:HGNC:9377]	0.598266
C1QB	complement C1q B chain [Source:HGNC Symbol;Acc:HGNC:1242]	0.598213
HORMAD2	HORMA domain containing 2 [Source:HGNC Symbol;Acc:HGNC:28383]	0.597698
ZNF101	zinc finger protein 101 [Source:HGNC Symbol;Acc:HGNC:12881]	0.597663
PSD3	pleckstrin and Sec7 domain containing 3 [Source:HGNC Symbol;Acc:HGNC:19093]	0.597484
PGAM2	phosphoglycerate mutase 2 [Source:HGNC Symbol;Acc:HGNC:8889]	0.597364
PLCD3	phospholipase C delta 3 [Source:HGNC Symbol;Acc:HGNC:9061]	0.597165
PSPN	persephin [Source:HGNC Symbol;Acc:HGNC:9579]	0.597091
VARS2	valyl-tRNA synthetase 2, mitochondrial [Source:HGNC Symbol;Acc:HGNC:21642]	0.597061
ZNF775	zinc finger protein 775 [Source:HGNC Symbol;Acc:HGNC:28501]	0.596508
INSYN1	inhibitory synaptic factor 1 [Source:HGNC Symbol;Acc:HGNC:33753]	0.59604
APLP1	amyloid beta precursor like protein 1 [Source:HGNC Symbol;Acc:HGNC:597]	0.594215
SLC25A35	solute carrier family 25 member 35 [Source:HGNC Symbol;Acc:HGNC:31921]	0.592967
RPL29	ribosomal protein L29 [Source:HGNC Symbol;Acc:HGNC:10331]	0.591709
TOR1A	torsin family 1 member A [Source:HGNC Symbol;Acc:HGNC:3098]	0.591393
COBLL1	cordon-bleu WH2 repeat protein like 1 [Source:HGNC Symbol;Acc:HGNC:23571]	0.59136
TM7SF2	transmembrane 7 superfamily member 2 [Source:HGNC Symbol;Acc:HGNC:11863]	0.591252
HOXA7	homeobox A7 [Source:HGNC Symbol;Acc:HGNC:5108]	0.59122
FMNL2	formin like 2 [Source:HGNC Symbol;Acc:HGNC:18267]	0.59108
CC2D2B	coiled-coil and C2 domain containing 2B [Source:HGNC Symbol;Acc:HGNC:31666]	0.590822
ACBD6	acyl-CoA binding domain containing 6 [Source:HGNC Symbol;Acc:HGNC:23339]	0.590732
PRX	periaxin [Source:HGNC Symbol;Acc:HGNC:13797]	0.590686
TMEM63A	transmembrane protein 63A [Source:HGNC Symbol;Acc:HGNC:29118]	0.590655
BTBD2	BTB domain containing 2 [Source:HGNC Symbol;Acc:HGNC:15504]	0.590583
ADAM3A	ADAM metallopeptidase domain 3A (pseudogene) [Source:HGNC Symbol;Acc:HGNC:209]	0.59003
LBR	lamin B receptor [Source:HGNC Symbol;Acc:HGNC:6518]	0.589175
ITCH	itchy E3 ubiquitin protein ligase [Source:HGNC Symbol;Acc:HGNC:13890]	0.588946
CCDC85B	coiled-coil domain containing 85B [Source:HGNC Symbol;Acc:HGNC:24926]	0.588833
PDE4A	phosphodiesterase 4A [Source:HGNC Symbol;Acc:HGNC:8780]	0.588353
WDR97	WD repeat domain 97 [Source:HGNC Symbol;Acc:HGNC:26959]	0.588175
MZT2B	mitotic spindle organizing protein 2B [Source:HGNC Symbol;Acc:HGNC:25886]	0.587833
MID1	midline 1 [Source:HGNC Symbol;Acc:HGNC:7095]	0.587773
LBHD1	LBH domain containing 1 [Source:HGNC Symbol;Acc:HGNC:28351]	0.586548
PROK2	prokineticin 2 [Source:HGNC Symbol;Acc:HGNC:18455]	0.58606
GDF1	growth differentiation factor 1 [Source:HGNC Symbol;Acc:HGNC:4214]	0.586009
NPEPPS	aminopeptidase puromycin sensitive [Source:HGNC Symbol;Acc:HGNC:7900]	0.585053
OGFRL1	opioid growth factor receptor like 1 [Source:HGNC Symbol;Acc:HGNC:21378]	0.584881
H1-0	H1.0 linker histone [Source:HGNC Symbol;Acc:HGNC:4714]	0.584853
AVPR2	arginine vasopressin receptor 2 [Source:HGNC Symbol;Acc:HGNC:897]	0.584759
POLR1E	RNA polymerase I subunit E [Source:HGNC Symbol;Acc:HGNC:17631]	0.584755
SEPTIN6	septin 6 [Source:HGNC Symbol;Acc:HGNC:15848]	0.583359
RHBDD1	rhomboid domain containing 1 [Source:HGNC Symbol;Acc:HGNC:23081]	0.583202
CLCN2	chloride voltage-gated channel 2 [Source:HGNC Symbol;Acc:HGNC:2020]	0.583165
IRF1	interferon regulatory factor 1 [Source:HGNC Symbol;Acc:HGNC:6116]	0.582666
MBOAT7	membrane bound O-acyltransferase domain containing 7 [Source:HGNC Symbol;Acc:HGNC:15505]	0.582568
AFF2	AF4/FMR2 family member 2 [Source:HGNC Symbol;Acc:HGNC:3776]	0.581695
LAP3	leucine aminopeptidase 3 [Source:HGNC Symbol;Acc:HGNC:18449]	0.581372
KIFC2	kinesin family member C2 [Source:HGNC Symbol;Acc:HGNC:29530]	0.581281
ERRFI1	ERBB receptor feedback inhibitor 1 [Source:HGNC Symbol;Acc:HGNC:18185]	0.581049
STARD6	StAR related lipid transfer domain containing 6 [Source:HGNC Symbol;Acc:HGNC:18066]	0.580572
DOCK4	dedicator of cytokinesis 4 [Source:HGNC Symbol;Acc:HGNC:19192]	0.580551
AMER1	APC membrane recruitment protein 1 [Source:HGNC Symbol;Acc:HGNC:26837]	0.579554
SH2D5	SH2 domain containing 5 [Source:HGNC Symbol;Acc:HGNC:28819]	0.579528
FAS	Fas cell surface death receptor [Source:HGNC Symbol;Acc:HGNC:11920]	0.579524
MSANTD3	Myb/SANT DNA binding domain containing 3 [Source:HGNC Symbol;Acc:HGNC:23370]	0.579407
OSGEPL1	O-sialoglycoprotein endopeptidase like 1 [Source:HGNC Symbol;Acc:HGNC:23075]	0.579399
TBC1D9B	TBC1 domain family member 9B [Source:HGNC Symbol;Acc:HGNC:29097]	0.579152
CLUAP1	clusterin associated protein 1 [Source:HGNC Symbol;Acc:HGNC:19009]	0.578464
IRF2	interferon regulatory factor 2 [Source:HGNC Symbol;Acc:HGNC:6117]	0.577357
SMAD9	SMAD family member 9 [Source:HGNC Symbol;Acc:HGNC:6774]	0.57735
SLC16A14	solute carrier family 16 member 14 [Source:HGNC Symbol;Acc:HGNC:26417]	0.57735
GAREM2	GRB2 associated regulator of MAPK1 subtype 2 [Source:HGNC Symbol;Acc:HGNC:27172]	0.57735
ABHD16B	abhydrolase domain containing 16B [Source:HGNC Symbol;Acc:HGNC:16128]	0.57735
TSPAN15	tetraspanin 15 [Source:HGNC Symbol;Acc:HGNC:23298]	0.57735
SETBP1	SET binding protein 1 [Source:HGNC Symbol;Acc:HGNC:15573]	0.57735
ROBO1	roundabout guidance receptor 1 [Source:HGNC Symbol;Acc:HGNC:10249]	0.57735
TMTC1	transmembrane O-mannosyltransferase targeting cadherins 1 [Source:HGNC Symbol;Acc:HGNC:24099]	0.57735
BRSK2	BR serine/threonine kinase 2 [Source:HGNC Symbol;Acc:HGNC:11405]	0.57735
LRRC8E	leucine rich repeat containing 8 VRAC subunit E [Source:HGNC Symbol;Acc:HGNC:26272]	0.57735
TMEM131	transmembrane protein 131 [Source:HGNC Symbol;Acc:HGNC:30366]	0.577282
WDR90	WD repeat domain 90 [Source:HGNC Symbol;Acc:HGNC:26960]	0.577223
DGKE	diacylglycerol kinase epsilon [Source:HGNC Symbol;Acc:HGNC:2852]	0.576923
PAX5	paired box 5 [Source:HGNC Symbol;Acc:HGNC:8619]	0.576913
RACK1	receptor for activated C kinase 1 [Source:HGNC Symbol;Acc:HGNC:4399]	0.575914
CHPT1	choline phosphotransferase 1 [Source:HGNC Symbol;Acc:HGNC:17852]	0.575745
NRN1L	neuritin 1 like [Source:HGNC Symbol;Acc:HGNC:29811]	0.575363
RPL13	ribosomal protein L13 [Source:HGNC Symbol;Acc:HGNC:10303]	0.575232
SERPINF1	serpin family F member 1 [Source:HGNC Symbol;Acc:HGNC:8824]	0.575144
CCDC102A	coiled-coil domain containing 102A [Source:HGNC Symbol;Acc:HGNC:28097]	0.574755
FRS3	fibroblast growth factor receptor substrate 3 [Source:HGNC Symbol;Acc:HGNC:16970]	0.574661
MRC1	mannose receptor C-type 1 [Source:HGNC Symbol;Acc:HGNC:7228]	0.57418
CLDND1	claudin domain containing 1 [Source:HGNC Symbol;Acc:HGNC:1322]	0.573857
B3GNT3	UDP-GlcNAc:betaGal beta-1,3-N-acetylglucosaminyltransferase 3 [Source:HGNC Symbol;Acc:HGNC:13528]	0.573705
PIGF	phosphatidylinositol glycan anchor biosynthesis class F [Source:HGNC Symbol;Acc:HGNC:8962]	0.573685
ZNF687	zinc finger protein 687 [Source:HGNC Symbol;Acc:HGNC:29277]	0.573426
ALPK1	alpha kinase 1 [Source:HGNC Symbol;Acc:HGNC:20917]	0.573293
[truncated: 15,985 more rows]

## Sheet: Gene Sets Enriched in KrasON
NAME	GS<br> follow link to MSigDB	SIZE	ES	NES	NOM p-val	FDR q-val	FWER p-val	RANK AT MAX	LEADING EDGE
KEGG_PRION_DISEASES	KEGG_PRION_DISEASES	34	0.514345	1.45369	0	1	0.596	1176	tags=21%, list=7%, signal=22%
KEGG_ARGININE_AND_PROLINE_METABOLISM	KEGG_ARGININE_AND_PROLINE_METABOLISM	52	0.530083	1.42612	0	0.894149	0.742	2299	tags=29%, list=13%, signal=33%
KEGG_GRAFT_VERSUS_HOST_DISEASE	KEGG_GRAFT_VERSUS_HOST_DISEASE	26	0.627167	1.38786	0	0.764773	0.742	1226	tags=31%, list=7%, signal=33%
KEGG_TYPE_I_DIABETES_MELLITUS	KEGG_TYPE_I_DIABETES_MELLITUS	33	0.490705	1.38703	0	0.599999	0.742	1226	tags=21%, list=7%, signal=23%
KEGG_CELL_ADHESION_MOLECULES_CAMS	KEGG_CELL_ADHESION_MOLECULES_CAMS	119	0.504746	1.38368	0	0.523804	0.802	1289	tags=22%, list=7%, signal=23%
KEGG_LEISHMANIA_INFECTION	KEGG_LEISHMANIA_INFECTION	62	0.516049	1.38147	0	0.450337	0.844	1353	tags=24%, list=8%, signal=26%
KEGG_VIRAL_MYOCARDITIS	KEGG_VIRAL_MYOCARDITIS	60	0.493578	1.37516	0	0.423214	0.957	2970	tags=30%, list=17%, signal=36%
KEGG_SYSTEMIC_LUPUS_ERYTHEMATOSUS	KEGG_SYSTEMIC_LUPUS_ERYTHEMATOSUS	77	0.481858	1.3722	0	0.38062	0.957	1176	tags=21%, list=7%, signal=22%
KEGG_PENTOSE_PHOSPHATE_PATHWAY	KEGG_PENTOSE_PHOSPHATE_PATHWAY	26	0.483439	1.37014	0	0.343884	0.957	3132	tags=42%, list=17%, signal=51%
KEGG_COMPLEMENT_AND_COAGULATION_CASCADES	KEGG_COMPLEMENT_AND_COAGULATION_CASCADES	65	0.547446	1.35921	0.093254	0.335022	0.957	2656	tags=29%, list=15%, signal=34%
KEGG_FRUCTOSE_AND_MANNOSE_METABOLISM	KEGG_FRUCTOSE_AND_MANNOSE_METABOLISM	34	0.584836	1.35886	0	0.312193	0.957	2095	tags=41%, list=12%, signal=47%
KEGG_ANTIGEN_PROCESSING_AND_PRESENTATION	KEGG_ANTIGEN_PROCESSING_AND_PRESENTATION	60	0.504379	1.35384	0.086	0.302993	0.957	2806	tags=28%, list=16%, signal=33%
KEGG_RENAL_CELL_CARCINOMA	KEGG_RENAL_CELL_CARCINOMA	69	0.410259	1.34832	0	0.325575	1	1811	tags=20%, list=10%, signal=22%
KEGG_AUTOIMMUNE_THYROID_DISEASE	KEGG_AUTOIMMUNE_THYROID_DISEASE	37	0.631405	1.33999	0.0916335	0.311341	1	2697	tags=30%, list=15%, signal=35%
KEGG_ALLOGRAFT_REJECTION	KEGG_ALLOGRAFT_REJECTION	27	0.53904	1.33382	0	0.302854	1	2697	tags=37%, list=15%, signal=44%
KEGG_NOD_LIKE_RECEPTOR_SIGNALING_PATHWAY	KEGG_NOD_LIKE_RECEPTOR_SIGNALING_PATHWAY	56	0.445731	1.32965	0	0.290923	1	1143	tags=18%, list=6%, signal=19%
KEGG_JAK_STAT_SIGNALING_PATHWAY	KEGG_JAK_STAT_SIGNALING_PATHWAY	145	0.479373	1.31852	0.112016	0.313293	1	1811	tags=21%, list=10%, signal=24%
KEGG_HISTIDINE_METABOLISM	KEGG_HISTIDINE_METABOLISM	28	0.461103	1.31164	0.0972222	0.312688	1	1515	tags=21%, list=8%, signal=23%
KEGG_GLYCOLYSIS_GLUCONEOGENESIS	KEGG_GLYCOLYSIS_GLUCONEOGENESIS	58	0.584112	1.30262	0	0.324943	1	2056	tags=36%, list=11%, signal=41%
KEGG_ALANINE_ASPARTATE_AND_GLUTAMATE_METABOLISM	KEGG_ALANINE_ASPARTATE_AND_GLUTAMATE_METABOLISM	31	0.491343	1.28475	0.217119	0.363226	1	1602	tags=26%, list=9%, signal=28%
KEGG_CYTOSOLIC_DNA_SENSING_PATHWAY	KEGG_CYTOSOLIC_DNA_SENSING_PATHWAY	49	0.417056	1.27149	0.10166	0.370669	1	2227	tags=24%, list=12%, signal=28%
KEGG_GALACTOSE_METABOLISM	KEGG_GALACTOSE_METABOLISM	26	0.454968	1.25517	0.292929	0.40422	1	1855	tags=27%, list=10%, signal=30%
KEGG_CYTOKINE_CYTOKINE_RECEPTOR_INTERACTION	KEGG_CYTOKINE_CYTOKINE_RECEPTOR_INTERACTION	240	0.405849	1.24969	0	0.402407	1	1672	tags=23%, list=9%, signal=25%
KEGG_INTESTINAL_IMMUNE_NETWORK_FOR_IGA_PRODUCTION	KEGG_INTESTINAL_IMMUNE_NETWORK_FOR_IGA_PRODUCTION	41	0.482952	1.24293	0.290389	0.398159	1	1516	tags=29%, list=8%, signal=32%
KEGG_CHEMOKINE_SIGNALING_PATHWAY	KEGG_CHEMOKINE_SIGNALING_PATHWAY	174	0.341522	1.21994	0	0.44161	1	1896	tags=20%, list=11%, signal=22%
KEGG_TYROSINE_METABOLISM	KEGG_TYROSINE_METABOLISM	39	0.436591	1.20697	0	0.470338	1	1823	tags=21%, list=10%, signal=23%
KEGG_BLADDER_CANCER	KEGG_BLADDER_CANCER	41	0.417544	1.18965	0	0.506581	1	2435	tags=24%, list=14%, signal=28%
KEGG_AMINO_SUGAR_AND_NUCLEOTIDE_SUGAR_METABOLISM	KEGG_AMINO_SUGAR_AND_NUCLEOTIDE_SUGAR_METABOLISM	44	0.326472	1.16454	0	0.549143	1	2095	tags=25%, list=12%, signal=28%
KEGG_ACUTE_MYELOID_LEUKEMIA	KEGG_ACUTE_MYELOID_LEUKEMIA	57	0.385623	1.15952	0.202899	0.540421	1	2633	tags=28%, list=15%, signal=33%
KEGG_INSULIN_SIGNALING_PATHWAY	KEGG_INSULIN_SIGNALING_PATHWAY	135	0.385198	1.15078	0.206316	0.547898	1	2969	tags=25%, list=17%, signal=30%
KEGG_DRUG_METABOLISM_CYTOCHROME_P450	KEGG_DRUG_METABOLISM_CYTOCHROME_P450	51	0.452666	1.14721	0.319277	0.542288	1	2093	tags=24%, list=12%, signal=27%
KEGG_RIBOSOME	KEGG_RIBOSOME	83	0.61303	1.13311	0.308468	0.577648	1	4851	tags=73%, list=27%, signal=100%
KEGG_STARCH_AND_SUCROSE_METABOLISM	KEGG_STARCH_AND_SUCROSE_METABOLISM	39	0.488863	1.13184	0.204409	0.565486	1	2823	tags=28%, list=16%, signal=33%
KEGG_NEUROACTIVE_LIGAND_RECEPTOR_INTERACTION	KEGG_NEUROACTIVE_LIGAND_RECEPTOR_INTERACTION	259	0.363985	1.12374	0.10352	0.5676	1	1806	tags=11%, list=10%, signal=12%
KEGG_CARDIAC_MUSCLE_CONTRACTION	KEGG_CARDIAC_MUSCLE_CONTRACTION	75	0.371125	1.11406	0.302419	0.571705	1	2693	tags=23%, list=15%, signal=27%
KEGG_MTOR_SIGNALING_PATHWAY	KEGG_MTOR_SIGNALING_PATHWAY	52	0.406583	1.10012	0.404661	0.599031	1	2454	tags=27%, list=14%, signal=31%
KEGG_HUNTINGTONS_DISEASE	KEGG_HUNTINGTONS_DISEASE	171	0.300304	1.07577	0.40198	0.659835	1	2730	tags=20%, list=15%, signal=23%
KEGG_ALZHEIMERS_DISEASE	KEGG_ALZHEIMERS_DISEASE	159	0.252685	1.0657	0.40519	0.664883	1	2765	tags=19%, list=15%, signal=22%
KEGG_GLYCINE_SERINE_AND_THREONINE_METABOLISM	KEGG_GLYCINE_SERINE_AND_THREONINE_METABOLISM	30	0.494175	1.05954	0.380762	0.665026	1	1875	tags=30%, list=10%, signal=33%
KEGG_TYPE_II_DIABETES_MELLITUS	KEGG_TYPE_II_DIABETES_MELLITUS	47	0.382308	1.05821	0.478261	0.651495	1	2083	tags=23%, list=12%, signal=26%
KEGG_VEGF_SIGNALING_PATHWAY	KEGG_VEGF_SIGNALING_PATHWAY	76	0.34348	1.05799	0.206316	0.636824	1	3770	tags=36%, list=21%, signal=45%
KEGG_ETHER_LIPID_METABOLISM	KEGG_ETHER_LIPID_METABOLISM	33	0.432747	1.0573	0.502024	0.624854	1	4118	tags=45%, list=23%, signal=59%
KEGG_ADIPOCYTOKINE_SIGNALING_PATHWAY	KEGG_ADIPOCYTOKINE_SIGNALING_PATHWAY	67	0.384882	1.04922	0.402542	0.639937	1	3003	tags=34%, list=17%, signal=41%
KEGG_ARACHIDONIC_ACID_METABOLISM	KEGG_ARACHIDONIC_ACID_METABOLISM	55	0.382466	1.04511	0.293651	0.633661	1	3218	tags=29%, list=18%, signal=35%
KEGG_TRYPTOPHAN_METABOLISM	KEGG_TRYPTOPHAN_METABOLISM	40	0.34369	1.03788	0.376754	0.645529	1	1625	tags=18%, list=9%, signal=19%
KEGG_HYPERTROPHIC_CARDIOMYOPATHY_HCM	KEGG_HYPERTROPHIC_CARDIOMYOPATHY_HCM	83	0.324177	1.00558	0.289062	0.710485	1	2918	tags=27%, list=16%, signal=31%
KEGG_PYRUVATE_METABOLISM	KEGG_PYRUVATE_METABOLISM	39	0.334347	1.0006	0.378882	0.707703	1	2609	tags=26%, list=15%, signal=30%
KEGG_METABOLISM_OF_XENOBIOTICS_BY_CYTOCHROME_P450	KEGG_METABOLISM_OF_XENOBIOTICS_BY_CYTOCHROME_P450	49	0.372576	0.998039	0.289683	0.702186	1	2093	tags=20%, list=12%, signal=23%
KEGG_SNARE_INTERACTIONS_IN_VESICULAR_TRANSPORT	KEGG_SNARE_INTERACTIONS_IN_VESICULAR_TRANSPORT	35	0.264807	0.9943	0.298729	0.694781	1	4261	tags=34%, list=24%, signal=45%
KEGG_GLYCOSAMINOGLYCAN_BIOSYNTHESIS_HEPARAN_SULFATE	KEGG_GLYCOSAMINOGLYCAN_BIOSYNTHESIS_HEPARAN_SULFATE	26	0.354203	0.992248	0.553785	0.691733	1	2146	tags=15%, list=12%, signal=17%
KEGG_PHOSPHATIDYLINOSITOL_SIGNALING_SYSTEM	KEGG_PHOSPHATIDYLINOSITOL_SIGNALING_SYSTEM	75	0.356081	0.984858	0.48643	0.697762	1	2254	tags=25%, list=13%, signal=29%
KEGG_PROPANOATE_METABOLISM	KEGG_PROPANOATE_METABOLISM	31	0.307678	0.956418	0.601227	0.766095	1	1788	tags=16%, list=10%, signal=18%
KEGG_PURINE_METABOLISM	KEGG_PURINE_METABOLISM	155	0.268041	0.950384	0.672199	0.763796	1	2227	tags=17%, list=12%, signal=19%
KEGG_VASCULAR_SMOOTH_MUSCLE_CONTRACTION	KEGG_VASCULAR_SMOOTH_MUSCLE_CONTRACTION	113	0.278709	0.941721	0.498994	0.776587	1	1761	tags=14%, list=10%, signal=16%
KEGG_CALCIUM_SIGNALING_PATHWAY	KEGG_CALCIUM_SIGNALING_PATHWAY	173	0.312403	0.937555	0.48643	0.773377	1	2375	tags=20%, list=13%, signal=23%
KEGG_ERBB_SIGNALING_PATHWAY	KEGG_ERBB_SIGNALING_PATHWAY	86	0.338475	0.936905	0.583864	0.763935	1	2948	tags=22%, list=16%, signal=26%
KEGG_NATURAL_KILLER_CELL_MEDIATED_CYTOTOXICITY	KEGG_NATURAL_KILLER_CELL_MEDIATED_CYTOTOXICITY	109	0.285457	0.915582	0.6625	0.798419	1	2703	tags=22%, list=15%, signal=26%
KEGG_APOPTOSIS	KEGG_APOPTOSIS	82	0.282112	0.892074	0.582627	0.831388	1	3275	tags=28%, list=18%, signal=34%
KEGG_NOTCH_SIGNALING_PATHWAY	KEGG_NOTCH_SIGNALING_PATHWAY	47	0.270848	0.875201	0.710794	0.846396	1	2041	tags=21%, list=11%, signal=24%
KEGG_FC_GAMMA_R_MEDIATED_PHAGOCYTOSIS	KEGG_FC_GAMMA_R_MEDIATED_PHAGOCYTOSIS	94	0.268988	0.871402	0.382046	0.846974	1	2454	tags=18%, list=14%, signal=21%
KEGG_GLYCEROPHOSPHOLIPID_METABOLISM	KEGG_GLYCEROPHOSPHOLIPID_METABOLISM	77	0.247653	0.86838	0.717256	0.842618	1	3262	tags=26%, list=18%, signal=32%
KEGG_FOCAL_ADHESION	KEGG_FOCAL_ADHESION	195	0.293315	0.866571	0.8998	0.835093	1	2395	tags=20%, list=13%, signal=23%
KEGG_TOLL_LIKE_RECEPTOR_SIGNALING_PATHWAY	KEGG_TOLL_LIKE_RECEPTOR_SIGNALING_PATHWAY	94	0.281877	0.864896	0.583864	0.825723	1	2875	tags=27%, list=16%, signal=31%
KEGG_LINOLEIC_ACID_METABOLISM	KEGG_LINOLEIC_ACID_METABOLISM	25	0.374648	0.844811	0.52439	0.866337	1	3765	tags=32%, list=21%, signal=40%
KEGG_INOSITOL_PHOSPHATE_METABOLISM	KEGG_INOSITOL_PHOSPHATE_METABOLISM	54	0.294794	0.835051	0.663883	0.880072	1	3065	tags=28%, list=17%, signal=33%
KEGG_HEDGEHOG_SIGNALING_PATHWAY	KEGG_HEDGEHOG_SIGNALING_PATHWAY	53	0.295971	0.83383	0.607287	0.870233	1	1300	tags=9%, list=7%, signal=10%
KEGG_PANCREATIC_CANCER	KEGG_PANCREATIC_CANCER	70	0.272299	0.826785	0.807933	0.873529	1	2342	tags=23%, list=13%, signal=26%
KEGG_GNRH_SIGNALING_PATHWAY	KEGG_GNRH_SIGNALING_PATHWAY	98	0.272113	0.81363	0.787686	0.891151	1	3216	tags=27%, list=18%, signal=32%
KEGG_ARRHYTHMOGENIC_RIGHT_VENTRICULAR_CARDIOMYOPATHY_ARVC	KEGG_ARRHYTHMOGENIC_RIGHT_VENTRICULAR_CARDIOMYOPATHY_ARVC	74	0.284138	0.798913	0.904031	0.908865	1	2918	tags=23%, list=16%, signal=27%
KEGG_WNT_SIGNALING_PATHWAY	KEGG_WNT_SIGNALING_PATHWAY	146	0.241754	0.785135	0.781705	0.9172	1	2970	tags=20%, list=17%, signal=24%
KEGG_STEROID_HORMONE_BIOSYNTHESIS	KEGG_STEROID_HORMONE_BIOSYNTHESIS	40	0.307727	0.783147	0.899193	0.910342	1	2762	tags=15%, list=15%, signal=18%
KEGG_ENDOMETRIAL_CANCER	KEGG_ENDOMETRIAL_CANCER	52	0.255732	0.777217	0.799172	0.908467	1	2265	tags=19%, list=13%, signal=22%
KEGG_ECM_RECEPTOR_INTERACTION	KEGG_ECM_RECEPTOR_INTERACTION	83	0.325205	0.748719	0.818359	0.928749	1	1352	tags=19%, list=8%, signal=21%
KEGG_N_GLYCAN_BIOSYNTHESIS	KEGG_N_GLYCAN_BIOSYNTHESIS	44	0.226376	0.726332	0.79579	0.940799	1	3777	tags=30%, list=21%, signal=37%
KEGG_AMINOACYL_TRNA_BIOSYNTHESIS	KEGG_AMINOACYL_TRNA_BIOSYNTHESIS	41	0.223233	0.688024	0.712215	0.977201	1	3306	tags=27%, list=18%, signal=33%
KEGG_TGF_BETA_SIGNALING_PATHWAY	KEGG_TGF_BETA_SIGNALING_PATHWAY	85	0.262633	0.65821	0.8998	0.982744	1	2454	tags=18%, list=14%, signal=20%
KEGG_O_GLYCAN_BIOSYNTHESIS	KEGG_O_GLYCAN_BIOSYNTHESIS	28	0.219684	0.573841	0.894737	0.990556	1	3496	tags=29%, list=19%, signal=35%

## Sheet: Gene Sets Enriched in KrasOff
NAME	GS<br> follow link to MSigDB	SIZE	ES	NES	NOM p-val	FDR q-val	FWER p-val	RANK AT MAX	LEADING EDGE
KEGG_PPAR_SIGNALING_PATHWAY	KEGG_PPAR_SIGNALING_PATHWAY	68	-0.621769	-1.68023	0	0.152949	0.055	1563	tags=25%, list=9%, signal=27%
KEGG_SPHINGOLIPID_METABOLISM	KEGG_SPHINGOLIPID_METABOLISM	38	-0.430602	-1.41135	0	0.922804	0.73	2182	tags=24%, list=12%, signal=27%
KEGG_OOCYTE_MEIOSIS	KEGG_OOCYTE_MEIOSIS	108	-0.508969	-1.3377	0	1	0.953	2898	tags=31%, list=16%, signal=36%
KEGG_DNA_REPLICATION	KEGG_DNA_REPLICATION	35	-0.67315	-1.31707	0	1	1	2785	tags=60%, list=15%, signal=71%
KEGG_PROGESTERONE_MEDIATED_OOCYTE_MATURATION	KEGG_PROGESTERONE_MEDIATED_OOCYTE_MATURATION	83	-0.501616	-1.30391	0	1	1	2898	tags=34%, list=16%, signal=40%
KEGG_BASE_EXCISION_REPAIR	KEGG_BASE_EXCISION_REPAIR	33	-0.597449	-1.30046	0	0.984393	1	1795	tags=39%, list=10%, signal=44%
KEGG_AMYOTROPHIC_LATERAL_SCLEROSIS_ALS	KEGG_AMYOTROPHIC_LATERAL_SCLEROSIS_ALS	53	-0.441418	-1.29001	0	0.913796	1	3859	tags=32%, list=21%, signal=41%
KEGG_BASAL_TRANSCRIPTION_FACTORS	KEGG_BASAL_TRANSCRIPTION_FACTORS	32	-0.482626	-1.265	0	0.984218	1	6255	tags=59%, list=35%, signal=91%
KEGG_ALDOSTERONE_REGULATED_SODIUM_REABSORPTION	KEGG_ALDOSTERONE_REGULATED_SODIUM_REABSORPTION	42	-0.427892	-1.25963	0.0910891	0.923417	1	3789	tags=38%, list=21%, signal=48%
KEGG_HOMOLOGOUS_RECOMBINATION	KEGG_HOMOLOGOUS_RECOMBINATION	27	-0.493275	-1.24663	0	0.884172	1	2315	tags=33%, list=13%, signal=38%
KEGG_CELL_CYCLE	KEGG_CELL_CYCLE	123	-0.519471	-1.2308	0.0972222	0.906208	1	3418	tags=43%, list=19%, signal=53%
KEGG_P53_SIGNALING_PATHWAY	KEGG_P53_SIGNALING_PATHWAY	65	-0.416279	-1.21964	0.0949495	0.873082	1	1961	tags=28%, list=11%, signal=31%
KEGG_PORPHYRIN_AND_CHLOROPHYLL_METABOLISM	KEGG_PORPHYRIN_AND_CHLOROPHYLL_METABOLISM	32	-0.482382	-1.21223	0.111111	0.850765	1	4231	tags=34%, list=24%, signal=45%
KEGG_HEMATOPOIETIC_CELL_LINEAGE	KEGG_HEMATOPOIETIC_CELL_LINEAGE	79	-0.415894	-1.20373	0	0.860498	1	1060	tags=23%, list=6%, signal=24%
KEGG_TASTE_TRANSDUCTION	KEGG_TASTE_TRANSDUCTION	42	-0.420959	-1.19957	0.101533	0.82804	1	841	tags=10%, list=5%, signal=10%
KEGG_VIBRIO_CHOLERAE_INFECTION	KEGG_VIBRIO_CHOLERAE_INFECTION	53	-0.449692	-1.19783	0.0997963	0.783873	1	3309	tags=42%, list=18%, signal=51%
KEGG_NUCLEOTIDE_EXCISION_REPAIR	KEGG_NUCLEOTIDE_EXCISION_REPAIR	42	-0.479225	-1.18682	0	0.778928	1	6247	tags=64%, list=35%, signal=98%
KEGG_GLUTATHIONE_METABOLISM	KEGG_GLUTATHIONE_METABOLISM	46	-0.369662	-1.1777	0.102	0.773206	1	833	tags=15%, list=5%, signal=16%
KEGG_VALINE_LEUCINE_AND_ISOLEUCINE_DEGRADATION	KEGG_VALINE_LEUCINE_AND_ISOLEUCINE_DEGRADATION	44	-0.381473	-1.17262	0.185859	0.748457	1	4879	tags=50%, list=27%, signal=68%
KEGG_SPLICEOSOME	KEGG_SPLICEOSOME	122	-0.501569	-1.16048	0.0989899	0.752952	1	6187	tags=70%, list=34%, signal=107%
KEGG_RNA_DEGRADATION	KEGG_RNA_DEGRADATION	57	-0.454033	-1.14031	0.192698	0.797696	1	6096	tags=54%, list=34%, signal=82%
KEGG_BUTANOATE_METABOLISM	KEGG_BUTANOATE_METABOLISM	33	-0.41667	-1.13625	0.187879	0.791564	1	3192	tags=33%, list=18%, signal=40%
KEGG_LYSOSOME	KEGG_LYSOSOME	120	-0.422121	-1.13108	0.192698	0.773407	1	4661	tags=46%, list=26%, signal=61%
KEGG_ABC_TRANSPORTERS	KEGG_ABC_TRANSPORTERS	42	-0.368398	-1.10859	0.101031	0.829161	1	971	tags=14%, list=5%, signal=15%
KEGG_T_CELL_RECEPTOR_SIGNALING_PATHWAY	KEGG_T_CELL_RECEPTOR_SIGNALING_PATHWAY	107	-0.344196	-1.10857	0.184466	0.797995	1	3894	tags=28%, list=22%, signal=36%
KEGG_UBIQUITIN_MEDIATED_PROTEOLYSIS	KEGG_UBIQUITIN_MEDIATED_PROTEOLYSIS	133	-0.32422	-1.10408	0.310345	0.783662	1	5075	tags=38%, list=28%, signal=53%
KEGG_PRIMARY_IMMUNODEFICIENCY	KEGG_PRIMARY_IMMUNODEFICIENCY	35	-0.440994	-1.09965	0.319312	0.772691	1	148	tags=11%, list=1%, signal=12%
KEGG_GLYCEROLIPID_METABOLISM	KEGG_GLYCEROLIPID_METABOLISM	49	-0.32428	-1.08748	0.196356	0.781605	1	2563	tags=24%, list=14%, signal=28%
KEGG_LYSINE_DEGRADATION	KEGG_LYSINE_DEGRADATION	43	-0.349195	-1.07818	0.209677	0.78378	1	3865	tags=35%, list=21%, signal=44%
KEGG_RNA_POLYMERASE	KEGG_RNA_POLYMERASE	27	-0.370758	-1.07525	0.377778	0.769733	1	6953	tags=70%, list=39%, signal=115%
KEGG_PYRIMIDINE_METABOLISM	KEGG_PYRIMIDINE_METABOLISM	94	-0.376392	-1.06467	0.392079	0.787349	1	2847	tags=34%, list=16%, signal=40%
KEGG_MATURITY_ONSET_DIABETES_OF_THE_YOUNG	KEGG_MATURITY_ONSET_DIABETES_OF_THE_YOUNG	25	-0.460646	-1.05787	0.306911	0.786005	1	2903	tags=12%, list=16%, signal=14%
KEGG_CITRATE_CYCLE_TCA_CYCLE	KEGG_CITRATE_CYCLE_TCA_CYCLE	30	-0.348894	-1.05291	0.30426	0.782846	1	5729	tags=50%, list=32%, signal=73%
KEGG_OLFACTORY_TRANSDUCTION	KEGG_OLFACTORY_TRANSDUCTION	291	-0.371659	-1.03564	0.346232	0.824101	1	975	tags=1%, list=5%, signal=1%
KEGG_CYSTEINE_AND_METHIONINE_METABOLISM	KEGG_CYSTEINE_AND_METHIONINE_METABOLISM	32	-0.370934	-1.01913	0.384314	0.847509	1	2590	tags=31%, list=14%, signal=36%
KEGG_MELANOGENESIS	KEGG_MELANOGENESIS	99	-0.307126	-1.0162	0.462745	0.833241	1	3285	tags=23%, list=18%, signal=28%
KEGG_RETINOL_METABOLISM	KEGG_RETINOL_METABOLISM	45	-0.388953	-1.01507	0.388446	0.81515	1	2252	tags=20%, list=13%, signal=23%
KEGG_SMALL_CELL_LUNG_CANCER	KEGG_SMALL_CELL_LUNG_CANCER	83	-0.320422	-1.01289	0.394059	0.798287	1	3875	tags=35%, list=22%, signal=44%
KEGG_AXON_GUIDANCE	KEGG_AXON_GUIDANCE	127	-0.31138	-1.0096	0.406061	0.795198	1	3067	tags=21%, list=17%, signal=25%
KEGG_EPITHELIAL_CELL_SIGNALING_IN_HELICOBACTER_PYLORI_INFECTION	KEGG_EPITHELIAL_CELL_SIGNALING_IN_HELICOBACTER_PYLORI_INFECTION	67	-0.357192	-1.00451	0.389105	0.78899	1	2767	tags=34%, list=15%, signal=40%
KEGG_REGULATION_OF_AUTOPHAGY	KEGG_REGULATION_OF_AUTOPHAGY	30	-0.391002	-1.00428	0.302419	0.774037	1	5441	tags=37%, list=30%, signal=52%
KEGG_GAP_JUNCTION	KEGG_GAP_JUNCTION	85	-0.311736	-0.999151	0.499029	0.766539	1	2611	tags=24%, list=15%, signal=27%
KEGG_PEROXISOME	KEGG_PEROXISOME	78	-0.259336	-0.982141	0.496016	0.790218	1	2309	tags=15%, list=13%, signal=18%
KEGG_PROTEASOME	KEGG_PROTEASOME	44	-0.351716	-0.965812	0.516949	0.822476	1	5594	tags=50%, list=31%, signal=72%
KEGG_OXIDATIVE_PHOSPHORYLATION	KEGG_OXIDATIVE_PHOSPHORYLATION	126	-0.341756	-0.960037	0.384454	0.832859	1	5226	tags=41%, list=29%, signal=58%
KEGG_FATTY_ACID_METABOLISM	KEGG_FATTY_ACID_METABOLISM	40	-0.253276	-0.947165	0.444668	0.853095	1	4879	tags=35%, list=27%, signal=48%
KEGG_BASAL_CELL_CARCINOMA	KEGG_BASAL_CELL_CARCINOMA	55	-0.33672	-0.938241	0.482422	0.866083	1	3683	tags=27%, list=20%, signal=34%
KEGG_MAPK_SIGNALING_PATHWAY	KEGG_MAPK_SIGNALING_PATHWAY	264	-0.259069	-0.93601	0.588822	0.855243	1	967	tags=10%, list=5%, signal=10%
KEGG_FC_EPSILON_RI_SIGNALING_PATHWAY	KEGG_FC_EPSILON_RI_SIGNALING_PATHWAY	79	-0.305508	-0.911848	0.6	0.893239	1	3894	tags=28%, list=22%, signal=35%
KEGG_CHRONIC_MYELOID_LEUKEMIA	KEGG_CHRONIC_MYELOID_LEUKEMIA	73	-0.285102	-0.905217	0.687379	0.885778	1	3875	tags=29%, list=22%, signal=37%
KEGG_VASOPRESSIN_REGULATED_WATER_REABSORPTION	KEGG_VASOPRESSIN_REGULATED_WATER_REABSORPTION	43	-0.227036	-0.897364	0.499018	0.88226	1	5644	tags=42%, list=31%, signal=61%
KEGG_LONG_TERM_DEPRESSION	KEGG_LONG_TERM_DEPRESSION	69	-0.260781	-0.896281	0.808678	0.86914	1	3280	tags=20%, list=18%, signal=25%
KEGG_GLIOMA	KEGG_GLIOMA	64	-0.284975	-0.889202	0.725296	0.865965	1	3875	tags=33%, list=22%, signal=42%
KEGG_GLYCOSYLPHOSPHATIDYLINOSITOL_GPI_ANCHOR_BIOSYNTHESIS	KEGG_GLYCOSYLPHOSPHATIDYLINOSITOL_GPI_ANCHOR_BIOSYNTHESIS	25	-0.293348	-0.883037	0.603083	0.861558	1	3522	tags=28%, list=20%, signal=35%
KEGG_NON_SMALL_CELL_LUNG_CANCER	KEGG_NON_SMALL_CELL_LUNG_CANCER	54	-0.27994	-0.88235	0.516832	0.850124	1	4888	tags=41%, list=27%, signal=56%
KEGG_DILATED_CARDIOMYOPATHY	KEGG_DILATED_CARDIOMYOPATHY	89	-0.304991	-0.877446	0.59751	0.846613	1	1060	tags=12%, list=6%, signal=13%
KEGG_PATHOGENIC_ESCHERICHIA_COLI_INFECTION	KEGG_PATHOGENIC_ESCHERICHIA_COLI_INFECTION	51	-0.303276	-0.875883	0.50495	0.83884	1	4833	tags=45%, list=27%, signal=61%
KEGG_COLORECTAL_CANCER	KEGG_COLORECTAL_CANCER	62	-0.278959	-0.861319	0.695146	0.864149	1	3789	tags=31%, list=21%, signal=39%
KEGG_REGULATION_OF_ACTIN_CYTOSKELETON	KEGG_REGULATION_OF_ACTIN_CYTOSKELETON	207	-0.263234	-0.859696	0.691262	0.857284	1	3805	tags=29%, list=21%, signal=36%
KEGG_PATHWAYS_IN_CANCER	KEGG_PATHWAYS_IN_CANCER	322	-0.243344	-0.859649	0.695146	0.844411	1	3805	tags=27%, list=21%, signal=33%
KEGG_NEUROTROPHIN_SIGNALING_PATHWAY	KEGG_NEUROTROPHIN_SIGNALING_PATHWAY	124	-0.266092	-0.843991	0.485437	0.866375	1	5822	tags=39%, list=32%, signal=57%
KEGG_MELANOMA	KEGG_MELANOMA	71	-0.26789	-0.842537	0.78865	0.857495	1	3875	tags=30%, list=22%, signal=38%
KEGG_ENDOCYTOSIS	KEGG_ENDOCYTOSIS	172	-0.253231	-0.834263	0.716505	0.864592	1	2898	tags=20%, list=16%, signal=24%
KEGG_LEUKOCYTE_TRANSENDOTHELIAL_MIGRATION	KEGG_LEUKOCYTE_TRANSENDOTHELIAL_MIGRATION	113	-0.272916	-0.825029	0.709163	0.870968	1	4868	tags=35%, list=27%, signal=47%
KEGG_B_CELL_RECEPTOR_SIGNALING_PATHWAY	KEGG_B_CELL_RECEPTOR_SIGNALING_PATHWAY	74	-0.270699	-0.806827	0.588349	0.898774	1	3894	tags=34%, list=22%, signal=43%
KEGG_LONG_TERM_POTENTIATION	KEGG_LONG_TERM_POTENTIATION	68	-0.252424	-0.790439	0.69901	0.915192	1	3770	tags=24%, list=21%, signal=30%
KEGG_PROSTATE_CANCER	KEGG_PROSTATE_CANCER	88	-0.229963	-0.779835	0.902153	0.922662	1	5347	tags=39%, list=30%, signal=55%
KEGG_DRUG_METABOLISM_OTHER_ENZYMES	KEGG_DRUG_METABOLISM_OTHER_ENZYMES	38	-0.313933	-0.772529	0.901381	0.922843	1	4125	tags=34%, list=23%, signal=44%
KEGG_RIG_I_LIKE_RECEPTOR_SIGNALING_PATHWAY	KEGG_RIG_I_LIKE_RECEPTOR_SIGNALING_PATHWAY	64	-0.258139	-0.762806	0.810707	0.916432	1	3693	tags=19%, list=21%, signal=24%
KEGG_ADHERENS_JUNCTION	KEGG_ADHERENS_JUNCTION	73	-0.23419	-0.7282	0.901575	0.943427	1	5611	tags=45%, list=31%, signal=65%
KEGG_THYROID_CANCER	KEGG_THYROID_CANCER	29	-0.283241	-0.728092	0.798403	0.930843	1	3683	tags=21%, list=20%, signal=26%
KEGG_TIGHT_JUNCTION	KEGG_TIGHT_JUNCTION	130	-0.227413	-0.72653	0.897541	0.920657	1	5150	tags=29%, list=29%, signal=41%
KEGG_PARKINSONS_DISEASE	KEGG_PARKINSONS_DISEASE	122	-0.222568	-0.712903	0.57732	0.927218	1	5226	tags=33%, list=29%, signal=46%
