# Supplementary material for: Multiomic characterization of pancreatic cancer-associated macrophage polarization reveals deregulated metabolic programs driven by the GM-CSF–PI3K pathway
Source: eLife. 2022 Feb 14;11:e73796. doi: 10.7554/eLife.73796 (PMC8843093; doi:10.7554/eLife.73796)
Supplement: Supplementary file 5. [file elife-73796-supp5.xlsx]

## Sheet: Intracellular Profiling (Fig.1)
Metabolite	M0-1	M0-2	M0-3	M1-1	M1-2	M1-3	M2-1	M2-2	M2-3	TAM-1	TAM-2	TAM-3	TAMb-1	TAMb-2	TAMb-3
94_malate Results	192448	314	2471	145747	28416	21143	743244	24630	15921	652312	26718	2461	65695	7243	28275
1_Nad Results	2380145	4701199	3609163	5996983	8829524	9041158	8213238	8070237	8637908	4799411	4652161	4268371	6505312	5097144	5824504
10_L-serine Results	149541	338614	367705	117417	243287	245882	168543	329463	322323	129470	222331	248661	175621	233677	254716
112_4-pyridoxate Results	140902	96706	40094	65798	116065	117936	96804	71754	94172	179249	185140	550214	171663	748985	350980
118_4-hydroxy-L-proline Results	91773	66023	68190	95829	98585	110689	79449	65622	65318	79415	87757	93471	81220	36875	97532
12_L-methionine Results	442816	263535	263721	400979	336605	411219	382818	156538	196705	322311	265201	266025	270347	271709	289912
13_L-tryptophan Results	5813474	5236941	5752178	4577307	4858363	5455969	4762044	4466766	4757186	4077235	4203131	4238530	3942169	4361626	4246103
130_allantoin Results	653475	312223	414905	528206	408422	458057	383262	298416	291339	328200	512531	493490	595770	546349	447408
133_xanthosine Results	117811	108182	109252	547162	877623	921677	81981	50014	55441	231142	221772	240486	223669	268136	247549
138_glyceraldehyde Results	31441213	28116843	28087074	93309856	93076739	98962789	38530784	33977927	33841497	62091027	61967215	64879068	64592987	66885854	67467656
14_L-phenylalanine Results	41344066	41555620	43188098	35992222	40282125	41031749	41798624	38379496	40087414	34672536	37364702	38303358	36970815	38573677	40088089
144_1-methyladenosine Results	114818	95275	87811	6487	13561	32542	71816	61577	19564	32336	72874	64053	12572	26370	72378
15_L-tyrosine Results	7706713	6619133	7085043	5957595	6707411	6969208	6478922	5988055	6310047	6124743	6699824	6628856	6304108	7226324	6510549
16_sucrose Results	268592	1198021	347680	155147	144960	177926	199371	229310	159929	375772	218058	243372	208145	266867	231689
17_D-fructose Results	62084	20858	19379	19824	14492	42725	10266	7696	16897	1969	6716	20251	16859	4849	22837
183_d-glucosamine 6-phosphate Results	92451	42561	92826	10170	52680	29732	26013	3730	26573	94030	2597	5603	80847	23956	18304
189_L-arginine Results	8931619	8295054	9541810	3629868	4305407	5210595	1326216	1368603	1582453	5949318	7410421	7396440	5312449	7083981	7129478
19_beta-alanine Results	44822	47827	49128	54374	52574	62181	81734	76850	79794	36345	38253	38708	33811	33154	34588
190_L-histidine Results	1032659	99202	134470	1107639	53972	1336084	77225	103982	125833	61133	112500	115295	715328	941598	945056
191_a-D-glucose-6-phosphate Results		56070	51181	513200	602000	987874	141967	87891	59538	52406	41906	50252	70243	34095	33753
192_DL-isocitric acid Results		269172	729287	65229	394905	1485339	297988	1009475	647363	493578	1116550	1539906	282185	1296195	227345
197_spermine Results	22335	1884	2978	5187	19430	17589	15575	6959	3991	13176	13655	10212	13864	6080	6263
21_uridine-5-monophosphate Results	199769	256748	281382	175218	378785	329376	330496	373482	467100	214683	239915	258147	265670	271806	320750
210_cytidine 2-3-cyclic monophosphate Results	333735	585715	475829	118980	20239	104400	539954	94189	461355	236336	148027	19464	118940	295855	425198
22_uracil Results	369899	289352	273411	774744	722260	753685	320863	245743	230015	451155	470897	465777	510393	482659	469148
222_guanosine 5_-diphosphate Results	4394	2078	2761	44401	96903	115822	5070	5351	14548	71	3487	2442	80	3305	2678
224_guanosine 5_-triphosphate Results	667823	1062370	906726	954729	695506	687601	878955	871749	798244	1297395	834678	872726	1082624	910134	895596
225_uridine 5--diphosphoglucose Results	993052	553685	538226	4420421	4683745	7249728	945580	1403245	1609451	699750	924344	886251	833507	962336	1143567
228_adenosine 5_-triphosphate Results	238633	450560	442672	578061	1041660	1570847	723823	1209849	1181659	248509	675171	551189	401665	666310	1075727
230_phosphocreatine Results	3475063	3446895	3412022	1508576	1223437	1916014	9611707	9824950	10998766	3737837	3819026	3839801	3852026	3932290	4738323
238_uridine 5--diphosphoglucuronic acid Results		213175	229665	64766	163749	130264	158863	222952	259905	108164	120749	114032	180552	204474	297245
24_D-galactose Results	32247	27431	16251	35329	32929	4968	9496	24068	34440	32510	26415	7545	2594	8280	27482
242_a-D-galactose 1-phosphate Results		73238	64701	682023	622467	898930	119751	82798	87360	48422	46960	47461	69075	42212	50325
243_D-fructose 6-phosphate Results	7627	172946	150830	1656585	1478974	2102692	268835	220282	187450	155419	126800	130160	163431	109802	118437
25_inosine 5-phosphate Results	126738	401103	535247	200748	1462909	971845	16135	81721	63703	83980	10822	18237	38565	50215	141884
251_adenosine 3--5--diphosphate Results		373474	298181		1682161	2024063	204332	841919	886500	157116	443309	372619	260694	316679	729309
257_uridine 5_-triphosphate Results	37724	42788	61804	27205	53969	79990	135955	200546	227265	47841	121586	105652	69806	108809	202716
264_L-pipecolic acid Results	575780	370014	592211	503092	525861	35806	535304	489720	515181	401364	450372	447342	277819	289478	192380
27_n-acetyl-d-glucosamine Results	104234	16720	4821	93552	10079	104685	67537	8230	4622	70744	5370	3358	51116	34383	3669
272_N-acetyl-L-asparagine Results	12972204	12070111	5995477	2016377	3246581	3644432	2173254	4294281	3175593	9817469	2038552	1990520	16998978	4578904	2139014
273_thiamine _ion Results	151557	58422	61075	15869	63871	34504	34884	28568	102729	48599	31902	32111	27047	398639	32091
277_S--5--adenosyl--L-homocysteine Results	212146	585522	1879375	1238645	989758	203170	556175	648823	177760	774441	814967	1685860	480119	65087	215263
28_adenine Results	100554	100240	102925	55302	62561	52868	87606	97551	83665	44654	45035	37197	44368	45207	45628
285_L-ornithine Results	8879	21137	14934	10530	6555	12343	19299	18120	11316	11305	12369	7233	13042	2997	13253
29_L-proline Results	54397	42047	47969	44500	41756	49847	50528	40415	41017	86647	78258	80225	89586	85749	85420
295_CMP _5_-?Cytidylic acid Results	54374	95682	92703	70980	130682	231440	77776	65438	88873	113766	104106	127826	145316	24957	145345
3_L-glutamic acid Results	106793	138393	140253	90225	93887	110171	143649	154927	157203	83488	84098	85794	83668	83360	97247
30_malate Results	914879	19657	748	460912	206883	49861	825796	40169	24914	55703	34373	31166	146839	1316	36465
301_L-histidine Results	17135	28570	115042	11918	7216	72673	64566	37782	65179	56457	29404	72454	13219	11396	17630
304_guanosine 5_-monophosphate Results	89963	102340	117610	212837	919908	816475	103610	166712	165081	93599	75478	69802	66649	80833	117432
31_L-asparagine Results	27915	91740	99877	16894	31773	35615	35812	78342	72993	22288	47140	42246	30064	39595	51811
312_glyoxylic acid Results	23540	18711	13701	21673	21944	22728	9870	17913	17484	21670	20477	21719	10294	9355	21816
317_N-phosphocreatine Results	3889170	3770135	3795852	1840754	1431521	1919379	10978160	11320865	11846952	4235421	4041784	4134134	4562268	4012284	4764587
33_citrate Results	15494	21076	242317	8016	630510	846116	7136	26283	125085	4151	57110	68206	9043	62678	91340
335_riboflavin Results	582790	720106	918983	1089400	1224335	803254	997019	751877	806723	667835	1399894	1304687	1183998	1331292	1174549
342_uridine 5_-triphosphate Results	38777	63681	58733	11871	59895	76093	134319	221336	225510	47819	118914	95167	68393	103750	205368
343_O-acetyl-cartine Results	66259	45910	53450	106973	142969	85586	408520	151695	44375	20017	183888	8981	458708	72471	39528
345_inosine 5_-monophosphate Results	58235	378435	480198	235721	1362812	815596	10572	65516	57540	9968	11273	7154	36142	40062	105768
352_2_deoxy-D-ribose Results	698730	16272	12696	184330	17603	22227	532267	9744	15396	261681	28259	19155	66402	2104	2923
36_5-methylthio-adenosine Results	26630	15836	16185	30075	256855	32626	234160	195273	23187	10397	12947	19458	8028	21659	13296
37_thymine Results	1848341	2173119	1961781	2264347	2331676	2348740	2151049	1968348	2172808	1503968	1738907	1896336	1753969	2116129	2175592
39_L-valine Results	20258597	19606906	6773647	18502857	18924331	4855905	16932014	15540761	16073805	15821064	16752929	16555005	16828564	18468771	4472555
392_cysteamine Results	19335	2104	83492	136893	87204	1189	73861	10887	4048	89521	603	58605	53824	79000	74283
394_alpha-d-glucose 1-phosphate Results	7627	172946	150830	1656585	1478974	2102692	268835	220282	187450	155419	126800	130160	163431	109802	118437
395_sn-glycerol 3-phosphate Results	113681	133157	118910	1838570	989227	1781669	359568	286300	359063	337446	322611	323025	301582	287583	287129
4_glycine Results	911515	488324	464447	1126449	1369801	1398997	750545	324058	305378	883153	766621	740003	814911	839192	814273
40_-lactate Results	31441213	28116843	28087074	93309856	93076739	98962789	38530784	33977927	33841497	62091027	61967215	64879068	64592987	66885854	67467656
402_glycerol 2-phosphate Results	151233	163707	176613	2288113	1526228	2339257	565688	402112	509258	463292	473943	451667	469930	423722	416470
405_inosine 5_-triphosphate Results	58240	4254	3771	33507	3192	2397	18463	5353	6904	12742	291	728	11163	909	1510
409_adenosine 5_-diphosphate Results	5466	460883	531546	1252	1792458	2438860	1246	1071402	1112184	222	525429	434033	77137	467127	758931
41_L-threonine Results	5295146	3021387	2961557	6330471	8158569	8042871	4539054	2050631	2014520	5465685	4486216	4521369	5103732	5102881	4898043
410_uridine 5_-diphosphate Results	17199	62649	56352	7093	74360	87136	18005	159037	143152	12651	92747	81586	22561	71638	163230
418_N-acetyl-DL-serine Results	5744	82592	94047	15781	151463	37413	65011	8939	25898	16657	5207	70219	41769	53556	78776
425_cytidine 5--diphosphocholine Results	18408	32433	43348	229674	405996	443650	22345	31814	32391	9491	7982	7234	10775	12837	12473
44_thymidine Results	22817	19711	20342	3731	4624	4699	17378	12763	12679	8690	11252	7978	12316	8940	11903
459_4-hydroxybenzoic acid Results	149534	31190	284241	291880	179705	212613	146023	82297	170196	325218	250518	261745	79626	103218	114585
48_taurine Results	109297246	109392531	110424986	127850808	128693796	132694828	114581968	114109540	118263381	102057997	108468907	98935905	97524851	92647674	135643375
492_kynurenic acid Results	267900	346459	114499	126983	120961	263445	215615	96785	155280	403591	154526	398045	46067	103989	34232
51_D-gluconic acid Results	34658	114560	84817	961008	1531286	2153609	24257	60894	176840	285883	327352	319355	30459	329985	354530
536_dehydro-L-ascorbic acid Results	1083268	758113	766942	635695	401374	804202	104548	809224	3939600	795492	2011455	339451	262883	1721673	323361
54_hypoxanthine Results	114040	36844	58681	649322	597290	529170	20672	23171	22762	27249	7639	14783	36506	33618	37617
551_biotin Results	893734	624288	671250	111457	314675	117479	520533	437071	428764	556397	573178	462369	740189	555162	580510
563_a- ketoglutaric acid Results	164615	373088	407218	140950	258036	240287	264093	331241	358862	181124	302451	316730	232649	292663	295210
6_succinate Results	31177	91759	84903	62702	144986	126016	26016	152563	144425	37091	52070	59813	50944	56492	61251
60_orotate Results	4370	638	7136	1366	4714	5315	5250	6284	358	13673	19925	21679	16823	22668	21990
61_uridine Results	893734	624288	671250	111457	314675	117479	520533	437071	428764	556397	573178	462369	740189	555162	580510
612_geranyl pyrophosphate Results	17292	7852	5795	5075	9510	7636	12568	26996	5551	40691	2666	10890	11405	6458	8550
62_creatine Results	354794	329469	110244	1398356	1535255	1640951	1101857	1356549	1299816	302869	331337	331170	187082	389393	489968
622_progesterone Results	80905	78201	924095	77912	116768	154382	31688	228705	111829	42277	53960	95540	63180	118439	97433
624_farnesyl diphosphate Results	189430	26044	33383	34317	17998	16689	22160	23275	16778	22411	16628	21759	26023	21109	18213
63_pyridoxine Results	3526035	2105658	2315968	2660657	2237672	2087141	2334358	1924676	1724762	2460844	1996090	2008749	2770949	2091071	2123446
64_citrulline Results	4209	3718	5874	139829	138311	155699	8076	5075	7764	8717	11562	10490	10586	10551	2801
641_linoleate Results	691881	974895	1407047	1144831	460265	1980693	524433	1875568	406641	2100676	1037014	1877356	723587	863324	1959557
65_L-kynurenine Results	40146	44695	46200	47507	56492	65465	43114	43794	41787	48170	49796	57588	10130	40950	44616
7_L-lysine Results	46577	95565	106225	38872	71009	68068	69229	92313	89970	44271	79472	82156	60166	88242	79840
716_phenylpyruvic acid Results	18949	17957	4878	7166	17964	12992	88239	97533	65974	11107	5104	9206	6435	17024	9874
72_urate Results	814114	703397	741039	219505	232022	267587	474352	317193	349226	716325	675676	657852	780883	746020	784750
758_Glycyldeoxycholic acid Results	24928	19962	19483	28571	20990	27377	20754	13671	21665	5020	17624	17837	13679	26522	36196
76_xanthine Results	9813	16176	14713	60525	252945	106157	2625	21047	24336	4340	6446	8633	8850	8463	11791
78_guanosine Results	27690	37054	62838	80152	247817	133343	1093	43520	27838	27642	29106	42333	9412	49130	58046
81_L-aspartate Results	416165	26981	3860	186191	4152	5827	358447	17452	21589	8604	12261	9746	99124	4369	6412
82_L-isoleucine Results	357088	356772	360140	345489	343252	362969	230628	313691	341586	248671	173150	271904	180407	274558	279852
84_dihydrofolate Results	26119	10092	14431	22345	17126	17429	21946	13476	14124	20897	14467	13610	21000	19509	15474
85_aconitate Results	83832	268779	14184	416232	213314	225766	971403	550164	499420	1864946	68206	39813	2803678	612054	49427
9_L-glutamine Results	1515411	3293514	3227829	1154203	2183420	2067828	2085306	3087675	3051358	1508847	2440311	2618259	1895377	2480613	2369557
92_L-cystine Results	839637	122624	165342	52386	71373	93559	36387	18665	26073	334526	30543	36280	106443	41143	30211
95_folic acid Results	2756124	1390605	1709827	2296545	1815764	1760068	2180503	1507280	1520639	1888106	1863283	1576247	2135714	1531353	1600722
96_hypotaurine Results	1697748	1711456	1751809	2290618	2278147	2611131	2379742	2450447	2443699	1545953	1568169	1559546	1461762	1344114	1691844
RP_Pos_1_Nad	3193838	3630183	3623587	4496121	6098242	5673841	7204467	6067481	8064482	3908768	4168391	3981700	4850496	4402414	4730355
RP_Pos_101_guanidinoacetate	82322	108672	83176	562053	503432	562306	437812	536071	508172	92270	84372	103222	120162	125902	100964
RP_Pos_105_(2R)-glyceraldehyde 3-phosphate	49274	69187	73271	74310	70854	73952	78723	85217	87787	91261	69439	81331	58965	72735	70310
RP_Pos_107_betaine	2063408	1950636	1630163	12554949	12174255	10219696	9859974	10381086	10494602	1575611	1695122	1910385	2256085	2291463	2199712
RP_Pos_109_creatinine	1133888	1055273	1198293	1159787	1301864	1504887	1410795	1179448	1414695	1308776	1410340	1504452	1478283	1313591	1494454
RP_Pos_11_L-ascorbate	10483	6304	18344	35953	6875	4670	11595	7593	6813	11212	15376	12471	12248	16646	18392
RP_Pos_110_sorbitol	34515	29368	31188	29604	27027	32065	31634	27420	27592	27325	26340	26529	26215	25897	24791
RP_Pos_112_4-pyridoxate	498664	387891	398397	349557	332853	359514	421888	337459	358625	2148901	2308353	2351245	2296228	2468346	2283644
RP_Pos_113_deoxycytidine	127777	97364	96800	106061	68601	84636	68354	66067	81327	20494	19301	19011	20972	17677	18411
RP_Pos_118_4-hydroxy-L-proline	27739606	27717109	28454263	27348005	14999157	28859405	24563395	20104647	24331842	20066759	20371481	19920907	22080701	20006683	20539883
RP_Pos_12_L-methionine	6619826	5595225	6095643	3944887	4692154	4943901	4983735	4256151	4424134	4242605	4086933	4411803	4430300	4092985	4101635
RP_Pos_120_N,N-dimethyl-glycine	419793	350828	416848	480895	522949	509037	342143	322769	315839	302637	349440	333544	301774	316979	307253
RP_Pos_123_1-methyl-L-histidine	61370	61592	70766	61012	51424	49680	66601	68236	77702	76940	89677	99794	85199	78752	86400
RP_Pos_126_D-ornithine	61635	51723	56566	49747	53850	59629	143846	114859	126844	36733	41476	43902	52773	52595	59573
RP_Pos_13_L-tryptophan	69734749	61512110	64495148	59425688	57869310	63226211	62640144	54649395	58211918	52814610	54719932	55403686	53207944	55355528	52991376
RP_Pos_133_xanthosine	107319	75916	93882	69848	67237	80291	99184	81269	90214	121160	123226	94168	131869	127846	114493
RP_Pos_135_homocystine	6069	10072	5578	7382	5842	5064	6686	13101	9551	3750	10605	5178	3859	4964	5795
RP_Pos_138_glyceraldehyde	20647	18099	18302	10808	8354	7420	23153	18176	17670	13294	17588	17085	11343	11515	11618
RP_Pos_14_L-phenylalanine	114383864	97119922	102928197	87571973	86811541	91768909	101685984	89728192	95317587	91075415	89886987	90494635	93816660	92930419	87435735
RP_Pos_140_5-oxo-l-proline	59015644	60014227	55826798	62524906	63906439	64199326	56576356	52608380	55885554	44106295	47464924	48868797	49614452	49594599	48723502
RP_Pos_144_1-methyladenosine	204071	185418	208548	83777	99358	97914	210923	193918	206822	246645	294535	292021	214636	214410	222866
RP_Pos_15_L-tyrosine	17427671	21153814	23522132	24661037	24377548	26274780	23172739	13843661	3885895	27376156	16678193	23586294	24294077	24556988	23311873
RP_Pos_155_pyridine-2,3-dicarboxylate	5853	7104	6811	16865	9169	10696	4901	5486	5409	12408	13842	15038	11262	11063	10791
RP_Pos_16_sucrose	73155	527373	69794	95397	31206	87240	121069	132201	105421	85903	133514	37608	116335	63638	42726
RP_Pos_166_3-cytidine monophosphate	34233	88178	53978	52915	40744	48516	3655	35634	32091	139197	43914	132577	82136	69963	84997
RP_Pos_17_D-fructose	33631	41139	44236	52595	55030	39655	35610	36025	30614	35738	40169	76116	36264	37804	51293
RP_Pos_177_L-leucine	44825374	37537593	39055730	36406035	35386100	38729788	37080023	29280454	33553833	28411404	27627099	26858209	29544225	28837673	27544586
RP_Pos_18_L-cysteine	150444	105480	112259	94942	81758	91234	115945	107476	106544	100527	98352	101964	107041	108353	96781
RP_Pos_183_d-glucosamine 6-phosphate	10435	10505	12887	23979	20799	25821	7165	7463	10207	17630	23932	19668	18150	19433	18249
RP_Pos_188_L-lysine	1331179	1090475	1411681	804762	908259	923359	991039	1352120	1368401	868801	865139	991959	1060900	975804	989801
RP_Pos_189_L-arginine	2616770	1920584	2347324	775269	942008	973887	439939	346924	396514	1289076	1431101	1435577	1537750	1431520	1383108
RP_Pos_190_L-histidine	404184	246573	371388	222499	321470	275210	416832	363708	383185	260249	301714	293344	305149	275692	261414
RP_Pos_191_a-D-glucose-6-phosphate	12955	6939	15327	28440	31397	33925	8643	9389	14165	7944	8118	9095	7873	8378	9885
RP_Pos_192_DL-isocitric acid	50755	54696	56218	51597	55587	60237	62834	60263	57639	81620	96543	97554	83306	100626	108659
RP_Pos_195_L---carnitine	428737	313845	532558	408717	343670	276509	837032	817804	803972	340508	406335	315816	278270	274358	419999
RP_Pos_196_spermidine	826481	1400755	1389910	1413442	1671496	1520151	640777	661130	542863	1134030	968413	940315	807272	893574	913214
RP_Pos_197_spermine	272998	484437	502882	159844	187749	199358	343322	301198	284487	495149	498235	478394	321257	293101	290600
RP_Pos_204_pyridoxamine	99959	82459	89289	60788	65954	68112	95497	89504	84660	70462	69390	69399	70594	72838	70336
RP_Pos_21_uridine-5-monophosphate	29612	31609	38219	16314	28371	18580	36880	32647	32620	35575	34894	40150	43219	40311	38141
RP_Pos_214_uridine 5-diphospho-N-acetylglucosamine	288125	200614	326875	202943	433681	467257	391761	471177	366969	450968	386944	361762	384544	332406	456081
RP_Pos_22_uracil	26486	27361	25372	57753	53216	62254	25006	18159	20653	37715	39443	38556	38787	39973	36713
RP_Pos_222_guanosine 5-diphosphate	28532	27690	19414	272666	292555	408531	44673	39683	49872	31325	29171	25627	29975	24688	37643
RP_Pos_225_uridine 5-diphosphoglucose	4197	12462	10746	26735	29581	26134	14391	28202	20539	22272	21157	28507	15549	21023	27953
RP_Pos_229_5-Aminoimidazole-4-carboxamide-1-b-D-ribofuranosyl 5-monophosphate	1351	1468	1442	27673	38339	35813	869	677	821	1695	1525	925	1274	476	1519
RP_Pos_230_phosphocreatine	1255568	1208700	1210705	1944114	2209644	2363746	2076516	2802122	2045176	3184685	2403461	1740454	2108852	2251273	1125739
RP_Pos_234_guanosine 5-diphosphoglucose	13530	14941	14172	198708	126809	170130	25362	21163	19751	15402	13140	13476	17570	11371	15452
RP_Pos_24_D-galactose	14434	17518	16903	39109	34542	32564	43901	29045	43746	33540	25261	17040	18429	24889	26252
RP_Pos_242_a-D-galactose 1-phosphate	11621	11393	14069	9004	13348	8855	12261	13370	11384	7812	6082	8353	9277	8907	7406
RP_Pos_243_D-fructose 6-phosphate	15512	13641	17166	42942	37682	38828	12305	17030	14741	11790	10313	11526	10183	11798	17857
RP_Pos_244_xanthosine 5-monophosphate	10660	11983	14348	7885	15530	12783	4437	7765	7165	3180	3017	2958	3923	4748	5806
RP_Pos_25_inosine 5-phosphate	123058	83580	100939	345437	743006	566381	171522	139367	106434	111585	4030	2712	10684	43737	66678
RP_Pos_250_pyridoxal 5-phosphate	465370	381690	385563	498974	502419	537513	862450	784203	824620	442018	408176	360536	369818	314198	434525
RP_Pos_251_adenosine 3,5-diphosphate	638970	705196	682027	1666916	2764447	1621838	1244251	1462383	1291077	662827	675581	599165	676547	442213	1090666
RP_Pos_252_flavin adenine dinucleotide	186227	208309	161109	360260	327224	380136	376122	280099	274814	290519	244707	243978	220006	194711	200707
RP_Pos_254_cytidine 5-diphosphate	5899	5913	3292	18421	24641	20146	10534	5541	2800	4853	10524	11131	13772	9855	756
RP_Pos_255_inosine 5-diphosphate	42658	29358	46009	96773	193473	186325	81305	118289	83031	40219	35795	45444	47435	36690	79024
RP_Pos_258_dihydroxyacetone phosphate	45279	62198	66683	66779	62671	66275	68129	79117	77371	79936	64052	73105	52261	64792	62591
RP_Pos_264_L-pipecolic acid	47581	17125	12009	25213	42620	21792	29484	16624		106086	3067	20711	41425	88519	26243
RP_Pos_27_n-acetyl-d-glucosamine	936168	2401831	2401052	277953	111784	107369	688532	1286552	1034641	3170435	696720	1826604	2132136	833719	495459
RP_Pos_272_N-acetyl-L-asparagine	23247	22437	25585	9853	11440	12155	5397	4870	5223	17002	18416	17623	18194	21422	17201
RP_Pos_275_a-N-acetyl-L-lysine	63174	57768	62513	38367	37106	40933	53212	49097	56811	70619	78623	71088	81403	81552	61562
RP_Pos_277_S-5-adenosyl-L-homocysteine	52684	65499	66391	260397	231631	285011	122985	125820	122614	120589	127485	128135	99797	105589	124937
RP_Pos_28_adenine	1186853	1179054	1173187	1934392	1743692	1903316	1649103	1378574	1418765	993838	1145739	1154683	1046835	1086669	1311633
RP_Pos_282_D-(-)-3-phosphoglyceric acid	18316	37850	37439	19192	24512	23299	38038	32079	29505	35744	35416	17925	28970	35444	26351
RP_Pos_285_L-ornithine	61635	51723	56566	49747	53850	59629	143846	114859	126844	36733	41476	43902	52773	52595	59573
RP_Pos_29_L-proline	1194523	1130020	1168848	759031	778484	851850	1004735	857771	932673	1617890	2043167	1811354	1921544	1753889	1512602
RP_Pos_3_L-glutamic acid	519263	685600	715694	565227	642535	611614	709493	863453	838622	450297	510960	487573	508384	483058	537539
RP_Pos_301_L-histidine	232056	182573	237245	191098	187029	196513	216838	245963	248998	169762	179337	221088	195453	236202	182476
RP_Pos_304_guanosine 5-monophosphate	139121	136575	132434	264833	598748	419631	128537	171958	153284	119986	85334	74711	92034	79775	108293
RP_Pos_31_L-asparagine	81315	122811	188846	57120	21559	27177	21428	41035	24823	80152	35250	40677	40940	25215	20846
RP_Pos_312_glyoxylic acid	5332	9277	11751	9526	8817	8125	8228	4413	9452	5393	5396	11595	12104	6817	10440
RP_Pos_32_nicotinamide	16667366	14112594	13930512	13271945	12655393	15139332	13760508	14202709	13262716	13994511	15133478	13814131	14485741	13862279	15667958
RP_Pos_33_citrate	50755	54696	56218	51597	55587	60237	62834	60263	57639	81620	96543	97554	83306	100626	108659
RP_Pos_332_4-aminobutanoic acid	2291468	2244949	2263840	2539987	2967863	2761246	2104781	2099869	1952974	1697364	1711307	1838826	1763139	1661417	1672614
RP_Pos_343_O-acetyl-L-carnitine	34091346	40723371	31618519	50812418	52094693	50331669	66964527	69318566	71444124	34879856	35826449	33473866	38717634	30545793	41046503
RP_Pos_345_inosine 5-monophosphate	41501	25795	30805	46941	64353	84843	52764	53690	57673	40297	41144	34376	42313	33012	46682
RP_Pos_348_acetylcholine	18690	19858	22792	15739	19069	12383	20999	27972	22578	15654	19122	26093	15873	17179	14968
RP_Pos_354_adenosine	1177053	1726507	1264732	658266	1753227	755952	1323439	1012567	1038392	1671032	876864	920898	731851	708307	723283
RP_Pos_36_5-methylthio-adenosine	21233202	23306508	22867079	34557666	33263419	36099403	28823103	26718253	27883273	18928319	21589342	20537337	18889932	20505658	24667687
RP_Pos_37_thymine	567018	506643	606823	110233	100769	111174	416711	361662	353362	332914	370242	321150	435985	335303	366796
RP_Pos_374_5-deoxyadenosine	55006	45853	47488	13399	20096	14473	16411	14160	15703	38651	42048	36084	8970	7127	9788
RP_Pos_385_cytidine	88003	81226	87014	58134	89224	81517	57985	34994	38971	51871	47293	47250	66383	58742	61555
RP_Pos_388_3-hydroxykynurenine	7821	8630	9490	3929	5234	2770	6364	6020	8180	9131	10084	10464	10829	10801	9340
RP_Pos_39_L-valine	3136285	3710489	3865221	3568761	3607383	2724663	3559935	3030195	2629235	2773194	2922394	1813217	1477977	1957065	2318213
RP_Pos_394_alpha-d-glucose 1-phosphate	273572	169419	277968	61504	84594	70904	263050	192951	218255	126634	186828	167249	188732	182211	169973
RP_Pos_395_sn-glycerol 3-phosphate	13182	14672	22890	18410	10263	15962	8374	314	13469	3425	14048	11224	3502	8745	9543
RP_Pos_397_glycerol 3-phosphocholine	3160431	4720779	4643744	15387932	11649308	13414903	2539679	3503639	3186995	6924604	8097233	9140294	7036850	5222733	7112696
RP_Pos_406_R,S-2-hydroxybutyric acid	26029	5426	6065	10814	119	19494	18534	73	2766	5247	731	2906	1662	521	2153
RP_Pos_409_adenosine 5-diphosphate	773782	850486	929956	2543825	3615812	2798751	1712809	1932329	1524221	733418	968360	784103	708833	776374	1436656
RP_Pos_41_L-threonine	120320	130591	113914	114071	107812	95563	98730	102554	105948	96753	110620	117812	106675	107019	109464
RP_Pos_410_uridine 5-diphosphate	10804	17378	13519	7885	18660	11502	7350	13251	11350	18524	22310	17720	8362	14835	5013
RP_Pos_418_N-acetyl-DL-serine	46371814	43429730	44337961	41596738	41527576	41998248	42617180	40849837	43835152	40969417	45095978	47824852	47034259	47871421	44824035
RP_Pos_425_cytidine 5--diphosphocholine	5578	8362	11058	64436	87380	81217	5359	6738	9067	4456	3573	2256	2929	5190	2930
RP_Pos_428_N-trimethylamine	365823	287785	208998	134284	343501	335110	369970	337658	348343	267249	100455	92073	247047	251217	284469
RP_Pos_43_sarcosine	390939	386956	432739	894085	899631	838369	1125508	1252836	1327717	318633	251441	294968	355995	356986	348842
RP_Pos_454_oxaloacetic acid	69113	108625	163318	48156	20890	22337	20687	36112	24898	65813	28177	37669	35190	22109	20794
RP_Pos_462_2,3-dihydroxybenzoate	21403	12936	14499	21023	18727	17913	18899	23666	19345	14001	19367	13751	13145	18613	12962
RP_Pos_47_guanine	12775	6553	6021	9040	12506	53154	13138	26312	13949	18510	5195	8579	4950	8907	11977
RP_Pos_48_taurine	137885	196759	210482	224935	140496	203802	170960	282157	262230	159157	178239	122395	176069	159269	150081
RP_Pos_492_kynurenic acid	1575522	1221696	1258308	1138884	1194662	1275514	1309069	1008929	1125024	1372457	1426012	1416001	1445524	1521994	1401068
RP_Pos_499_xanthurenic acid	196507	162675	182925	163526	158668	174106	168649	156073	163404	146174	147257	154608	142564	153014	146161
RP_Pos_5_L-alanine	1126489	1075534	1233248	2361288	2270047	2297419	2720859	3467493	3485776	750957	826048	698431	1040433	944134	1077198
RP_Pos_50_nicotinate	299309	259896	278389	303554	123434	306488	286713	260046	270565	263893	276625	274949	253895	294579	259988
RP_Pos_54_hypoxanthine	423382	414534	489987	3949378	7954879	6527466	76440	130233	103471	83404	49146	51363	240951	175915	219997
RP_Pos_55_L-homoserine	121358	108482	104804	90352	102979	97011	81980	88390	90484	77491	90519	90915	104703	92396	86379
RP_Pos_554_4-aminobenzoate
RP_Pos_56_D-glucose	18329	11044	11990	12940	13027	9736	8945	6914	7757	14560	16141	15438	20524	17896	12744
RP_Pos_577_anthranilate	22106	19359	19319	16860	16920	18274	20166	18886	18017	19771	19857	22431	18527	20364	19718
RP_Pos_578_serotonin	8320	7027	7115	6116	5883	7762	7513	6216	6829	13619	14786	15113	16743	16472	16179
RP_Pos_58_inosine	10368	11961	12399	139619	349061	273228	814	1907	1718	2996	982	644	6042	3844	5387
RP_Pos_607_acetoacetic acid	38457	26605	62074	63312	51799	48257	16942	34824	40630	18346	66797	42695	68723	48112	19984
RP_Pos_62_creatine	9234084	9448866	9556108	20464266	21099257	20403119	23580167	26249002	25968226	5823446	7104053	7365372	8382642	7111670	8984555
RP_Pos_625_indole	1271829	1380487	1235213	8875431	8931759	9290502	7198205	6757509	7468357	1326105	1214443	1250045	1831926	1585708	1623854
RP_Pos_63_pyridoxine	52155536	50721258	48767984	44496346	47973342	47570422	47621252	46878353	47453669	50260472	50408956	51534890	54789692	51369480	52774548
RP_Pos_630_cholic acid	16052	11516	16898	12469	23436	37615	18058	15708	14478	15517	23578	15420	21660	16049	34486
RP_Pos_639_stearate	330658	295848	197897	4196	6373	7469	231810	338924	179567	91939	185992	8357	93466	6804	164378
RP_Pos_64_citrulline	6902	5090	7696	112218	105510	123024	6445	5588	7536	5729	6652	8534	9849	8323	8153
RP_Pos_641_linoleate	1390	1590	8632	12206	5307	12055	1830	5291	12372	14057	1376	3259	4672	5818	4452
RP_Pos_65_L-kynurenine	165709	133376	149175	203445	203252	209695	157203	133009	134727	137725	149680	149652	121415	124995	120779
RP_Pos_66_4-aminobutanoate	6244	5349	5338	22872	19817	22115	18659	15347	16139	19113	15385	17590	21476	19116	20750
RP_Pos_67_(S)-Dihydroorotate	28328	37565	35809	31783	25323	24519	36028	29984	31233	33299	35057	32433	31632	30692	36660
RP_Pos_69_fructose 1,6-biphosphate	9999	13364	13866	60687	40584	32263	12700	13039	543	1483	10728	14468	14522	11070	12089
RP_Pos_7_L-lysine	1331179	1090475	1411681	804762	908259	923359	991039	1352120	1368401	868801	865139	991959	1060900	975804	989801
RP_Pos_71_Deoxyadenosine monophosphate	440063	503736	548678	1060851	1026650	1222274	1215087	1142409	1222016	805489	806294	736005	929589	775517	1164995
RP_Pos_719_vitamin D3 calciol	6585	36087	40907	52234	26254	4093	19738	28492	36906	23623	15712	6917	56882	34874	29824
RP_Pos_72_urate	325065	253314	240893	108566	101619	100099	145368	107416	118648	253764	246860	225730	267097	244757	256398
RP_Pos_74_cytosine	980656	832726	955309	72204	72999	74787	539878	455193	558413	371638	417887	353225	590403	475698	469054
RP_Pos_76_xanthine	71970	75266	70198	339835	648991	530986	49734	43621	46707	147579	159086	162394	150800	161702	165893
RP_Pos_765_2-aminobutanoic acid	200721	225408	253627	275586	319920	297620	212887	187258	218373	202260	197639	203623	203604	191604	185432
RP_Pos_78_guanosine	134841	147114	136620	456685	733905	751915	111336	115463	121155	61269	68770	68546	119790	110928	139262
RP_Pos_8_L-aspartate	19540	27342	20418	5267	5635	6615	9765	10064	15066	16786	15947	15762	14408	14955	17966
RP_Pos_81_L-aspartate	35529	26582	30127	15482	11305	17125	12545	10598	22317	28516	20462	17624	24867	25512	22437
RP_Pos_812_2-deoxyinosine	9670	10368	4683	9469	6685	4775	4280	6395	10722	6663	9524	10828	8150	4132	10257
RP_Pos_82_L-isoleucine	39141604	33020639	32153854	32274967	31085380	33784177	33093138	25698463	29445548	25442158	24579330	22862591	26529058	24664162	24044997
RP_Pos_869_sedoheptulose 7-phosphate	6854	3239	47061	22866	81208	32355	2083	9046	74792	39998	35531	60231	18288	26659	86084
RP_Pos_88_purine	6781	5070	10137	6814	11345	11390	8496	8522	9427	9709	9665	8217	9255	5016	9111
RP_Pos_9_L-glutamine	7584	12248	4252	64583	5247	246229	2639	3809	3719	58665	285403	269712	276830	289294	283491
RP_Pos_92_L-cystine	11314	11867	12395	110	61	390	548	641	271	723	6121	637	444	7147	2915
RP_Pos_95_folic acid	7797883	5840076	5946814	5365242	4979621	5779068	6254565	4626804	5209199	6322379	6339002	6241511	6423678	6623894	5480776
RP_Pos_97_D-tryptophan	69734749	61512110	64495148	59425688	57869310	63226211	62640144	54649395	58211918	52814610	54719932	55403686	53207944	55355528	52991376
RP_Pos_98_deoxyuridine	18375	805	708	4826	222	5179	19627	13327	14330	545	537	10398	697	1050	823

## Sheet: Extracellular Profiling (Fig.1)
Metabolite	DMEM-1	DMEM-2	DMEM-3	iK(cm)-1	iK(cm)-2	iK(cm)-3	iK(cm)bm-1	iK(cm)bm-2	iK(cm)bm-3	M0(cm)-1	M0(cm)-2	M0(cm)-3	M1(cm)-1	M1(cm)-2	M1(cm)-3	M2(cm)-1	M2(cm)-2	M2(cm)-3	TAM(cm)-1	TAM(cm)-2	TAM(cm)-3	TAMbm(cm)-1	TAMbm(cm)-2	TAMbm(cm)-3
10_L-serine Results	70354	80757	76622	91011	83067	4285	78762	68810	71741	20542	68732	32096	40911	232180	215415	35926	51447	13257	174023	10893	24478	7992	12851	170204
109_creatinine Results	86452	75695	71990	63542	34785	57595	62960	28142	33045	20939	29987	64353	25360	71772	69076	72274	27628	24987	62496	60832	32835	60776	61645	58350
112_4-pyridoxate Results	1538682	2351939	1878788	10440219	625461	647771	6225797	539187	9052092	1980634	1791846	2535824	1192609	783905	72867	2387175	1302062	1958609	8092138	6774046	9393926	8841286	6963431	2998903
118_4-hydroxy-L-proline Results	39227	34686	33901	27805	28722	25988	35055	26190	19351	39914	29275	40941	39537	29713	35184	14869	29657	39768	35263	35753	40754	32634	42030	37169
12_L-methionine Results	360155	321539	285622	157157	149498	140067	159915	16750	158453	485861	335241	423494	292737	297946	310493	431753	327562	468832	248328	196121	229163	207883	203100	229501
13_L-tryptophan Results	4484760	3240667	2388370	3172777	2458878	2062362	1438810	2248079	2557088	2286361	2902396	3736810	2231300	1402944	2919710	1967407	2799226	3226831	2673770	2493811	2795286	2733169	1320657	2702726
130_allantoin Results	1927763	1823996	1795184	1292728	3431978	2795303	3201818	2786952	3197096	2233260	1481761	1897000	3313735	2146963	2048855	2214120	2160675	1957140	2255189	2529966	3916230	2661096	2448270	2447110
133_xanthosine Results	24618	9523	16339	7774	6345	62048	49384	109370	72223	7144	2413	16806	573	13766	4065	1762	16020	20538	30136	3416	4300	16811	5926	8357
135_homocystine Results	1	33	5	77501	169778	66167	95499	182122	235003	13	34	55	264	336	472	46	24	30	5587	59	44	16796	1113	7192
14_L-phenylalanine Results	16179049	12568152	12266113	13724332	12947178	17006705	13274586	1766202	19496061	14270507	9876781	20151579	14442014	19436521	19110078	12796781	11140329	11635188	11549832	10885371	13354426	19497850	12621637	12163042
141_cystathionine Results	28387	6926	24268	87089	67595	66899	73096	63779	74111	19618	13876	49699	48254	40419	42932	44407	13563	20360	18055	57607	64900	55514	61266	43339
144_1-methyladenosine Results	86824	154953	56066	594906	289150	410465	153473	410965	227143	852874	469399	321101	170742	85952	152484	244674	145294	170598	587695	220289	233738	206666	679137	297499
15_L-tyrosine Results	5639008	10544299	4801050	753624	797297	1080760	990267	1875705	1166618	6247917	6429541	13533696	1220437	2786775	5750194	8856100	3360312	6529950	2125211	1133555	1481211	1519847	1255328	1495399
17_D-fructose Results	25344	20180	33135	33942	48265	16822	32884	17048	20007	13999	968	27251	53107	18024	18676	1151	36015	32603	34267	33575	38079	18302	54395	53868
189_L-arginine Results	54468551	47452460	47541244	39147588	31973321	34066644	40462692	34092296	35439748	61431769	50347466	56440168	42348756	39026304	39175033	30856505	26036830	30892428	39557121	38154692	38539364	35573278	39893656	39850407
190_L-histidine Results	1210881	1149778	1065712	100805	320189	902408	295113	876775	83251	1498191	1325584	1437091	957139	1381049	118680	1345792	1120857	1422568	1123951	1212177	142550	82713	1251921	145294
191_a-D-glucose-6-phosphate Results	9027	9500	9131	35900	36055	28377	26629	19927	3770	10443	8257	10645	12931	7182	667	3236	10647	7067	10895	11939	14653	31342	32474	32533
192_DL-isocitric acid Results	32036	13656	30305	265994	2166612	2443295	3224768	2211273	2315526	120517	102443	112421	94948	102936	70875	266141	272233	345835	2030029	1980873	1893915	1872744	2160424	2014863
197_spermine Results	449703	523869	541714	27516	381656	352273	336783	30828	378698	475231	398632	517961	352673	503286	454922	501564	357093	521476	360208	66094	373316	338217	18723	376888
210_cytidine 2-3-cyclic monophosphate Results	4166339	3626752	4583839	83242	8323	7916	9749	74491	18339	89104	2198589	3871944	426394	65195	45319	151927	3332355	1383565	35672	20861	343174	20532	391193	375126
22_uracil Results	1833633	1574904	1615597	3498425	3738217	3525744	3522794	3319592	3554704	1827889	1739737	1726008	3976455	3844291	3859737	1727634	1663399	1706649	2997005	3174885	3138355	3067166	3245491	2927620
224_guanosine 5_-triphosphate Results	1297571	915853	1139795	1101917	984846	858779	887344	680981	791799	1027986	850036	773816	795382	698388	700667	1012022	762941	448296	713016	1110993	709262	789246	764829	606534
235_adenosine-5--diphosphoglucose Results	2974	5513	6502	2888	18514	337	12048	39658	4970	10275	41985	73485	7376	7604	29713	3256	928	57827	15450	8069	7172	10117	3944	32346
24_D-galactose Results	43206	69897	34767	23475	42955	62693	33840	75041	15758	46993	10180	91018	16279	46128	52073	14692	5923	56238	50207	19495	62422	45401	54700	31316
242_a-D-galactose 1-phosphate Results	8001	3210	5225	46060	33740	27195	12130	29813	4424	11053	5507	6966	11353	649	9658	9237	7058	9142	15376	16286	15582	28059	29115	25153
243_D-fructose 6-phosphate Results	26946	24365	23526	80801	91466	77619	77837	77976	12282	24354	5474	23535	18805	25808	20230	24572	25461	27107	42793	42607	30077	79631	78022	73809
255_inosine 5_-diphosphate Results	4449	1864	4388	31070	21811	23647	26449	14689	15582	916	1209	2487	2309	9296	1035	4373	5666	4176	9776	2142	3595	19186	21031	8231
264_L-pipecolic acid Results	594160	689847	774308	25271	30030	36722	27480	71427	13236	95002	141915	568879	82329	108018	232405	102653	514895	333971	15405	53182	49576	30229	81942	86947
270_N-acetyl-DL-methionine Results	123393	95231	155744	92367	140678	33028	53030	22946	339538	6900	9938	4363	25278	14916	29995	14132	6643	10069	32705	33154	18509	14304	112848	36202
272_N-acetyl-L-asparagine Results	1931189	1676811	1889642	2118046	2650787	1103286	6345590	5909285	4889787	1726583	3183699	1268236	2117223	2133369	1737298	2136398	832958	1730262	1948254	1400163	1752047	1431939	1969763	3187415
277_S--5--adenosyl--L-homocysteine Results	346897	2328304	599261	991748	828342	554770	302029	350117	1389181	900367	611744	317656	751015	1231873	445015	1181394	310173	1224022	134115	880891	942026	527565	385179	531311
28_adenine Results	81684	89880	78895	44771	47720	37026	102335	87102	116746	4954	3808	2688	30405	11876	11685	4430	37097	31949	46714	5918	44054	55524	55778	56306
288_D-cellobiose Results	8699	18029	11485	87830	97247	97668	92682	88714	80439	12602	10772	9829	7042	11364	4477	15862	11166	16946	50826	4144	56221	2618	4190	3092
29_L-proline Results	100	218	5193	22281	27651	28742	29492	29242	31461	2929	338	18464	9637	9568	10347	11807	13956	4868	33631	31957	35632	30649	33530	31853
3_L-glutamic acid Results	38743	40292	39612	233430	224742	238693	224460	217867	211689	145933	122523	137524	233870	238149	218525	160804	137509	162478	203314	197345	205015	210399	215406	225472
30_malate Results	13666	12541	4130	100124	87281	97945	93911	85083	82975	19163	17169	18125	17480	16457	13772	19789	19709	18821	67469	69022	70616	66359	69257	69100
301_L-histidine Results	665049	36248	513982	246723	11977	63129	67847	4423	83756	555669	568711	773408	814244	742952	683729	722468	35521	38335	20011	16525	668345	425832	117636	151402
31_L-asparagine Results	154	76	184	21796	1048	21148	17061	1183	14243	53565	38258	49678	3500	1764	1194	2165	4157	2302	2282	1859	3025	28123	2168	41221
317_N-phosphocreatine Results	441	16	42	15082	17219	1514	15714	12732	15829	29	77	28	4467	4586	3546	807	5896	2398	5064	4520	5652	12789	10696	12679
335_riboflavin Results	585818	549476	85060	942370	725073	694953	787984	576635	533389	662598	525496	143795	773810	765115	442070	500886	247026	267907	456104	295716	267694	525745	253524	359918
343_O-acetyl-cartine Results	447	20497	40315	1184	1941	19486	1627	23583	15496	10559	3414	882	1801	16922	6700	7592	5495	10901	8448	3093	4119	345	1917	521
352_2_deoxy-D-ribose Results	11120	10999	9317	81711	79886	75361	73427	68771	72824	17566	12562	14282	13099	13364	12463	16476	13871	16180	54955	56642	56619	53463	54173	49340
39_L-valine Results	38817950	41175592	74160642	6496309	6592957	8702023	8157270	15536616	8976652	35213334	27741183	34399373	13473051	27826147	40708802	71349508	52060569	33992184	20393803	10687520	13249628	13680520	10919115	13294315
394_alpha-d-glucose 1-phosphate Results	26946	24365	23526	80801	91466	77619	77837	77976	12282	24354	5474	23535	18805	25808	20230	24572	25461	27107	42793	42607	30077	79631	78022	73809
4_glycine Results	434114	395229	421735	256646	258027	255496	251447	240987	240932	375304	301919	378295	406735	401542	382903	404854	310613	410098	249913	253155	265158	251506	278931	279692
41_L-threonine Results	1741096	1618448	1653928	963484	961088	939378	934961	971671	918668	1450983	1235035	1555772	1583489	1511379	1476599	1552327	1248467	1508086	947027	950370	1019090	1032461	1051210	1032441
44_thymidine Results	9459	7960	7764	4564	5533	6492	3890	3546	5161	128961	123031	129941	20202	17345	17545	90165	90451	89736	66528	72389	67657	73893	79192	74934
459_4-hydroxybenzoic acid Results	53425	65911	36670	138310	126140	149533	60975	73972	114352	32226	92673	67951	61590	90540	70282	98911	53956	43397	178800	20902	497406	66843	87519	74897
48_taurine Results	539403	637818	529432	1117	849	16565	15038	25356	16971	444282	101473	631023	122894	220371	1291604	241936	666626	469733	145573	77438	108805	110024	112182	129682
492_kynurenic acid Results	1238372	536368	428727	134723	911045	627963	745226	557653	38314	621107	831667	822665	1176816	767303	657413	1102463	705073	830455	808484	689701	478842	925890	743629	661580
525_N-acetyl-L-leucine Results	5223	9123	188	125894	115870	103202	121720	35194	184704	39800	1595	3532	14474	21696	13833	36548	32810	1312	85324	76318	33913	102797	35043	116917
531_2-methylmaleate Results	1049	419	776	29349	14386	17511	32876	15399	16578	26358	8134	15046	2463	2154	12084	16022	17790	24547	20932	15829	11752	18067	15217	21059
536_dehydro-L-ascorbic acid Results	1023151	2246512	980376	751103	888304	849121	143850	449577	69357	2768407	715869	1388135	1740188	620078	345527	568014	2507734	1272533	1093924	1381207	3293766	703467	1133063	638213
54_hypoxanthine Results	4810075	4296599	4259238	1032578	917325	831548	1035337	874272	924582	747749	1451136	1406913	5351665	4832605	4659713	1599333	1351802	1576762	99162	100140	69222	136823	125870	82006
551_biotin Results	286890	629240	226837	3169255	3172481	2882895	3334260	2714568	3187705	4630944	4191517	4309100	887229	797469	772111	3756367	3424794	3507817	3262728	3562941	3809007	2255983	3938785	2008985
556_purvic acid Results	379	143	865	43826	18112	11660	15515	23728	29906	17905	7345	17951	807	697	350	2833	6314	6217	15411	20347	18532	12028	18763	30601
56_D-glucose Results	21941	6164	19374	3392	13692	17546	2326	3033	10085	7501	3720	17668	6378	2802	4294	7974	20330	40229	3223	12455	7653	7623	12516	14547
563_a- ketoglutaric acid Results	288462	263088	269797	136752	139578	137709	125675	121764	138560	282225	252663	260174	214806	194324	203628	276190	217805	283418	165611	173088	171086	143424	156313	163643
6_succinate Results	86058	78847	81753	80985	85444	86118	80858	84560	84179	72328	62554	68624	140554	158006	146431	63915	62315	62167	77157	78429	85755	78206	90887	80072
61_uridine Results	286890	629240	226837	3169255	3172481	2882895	3334260	2714568	3187705	4630944	4191517	4309100	887229	797469	772111	3756367	3424794	3507817	3262728	3562941	3809007	2255983	3938785	2008985
612_geranyl pyrophosphate Results	31478	27747	23000	21476	3940	4131	43924	2265	72678	5016	56404	3738	2591	50576	50443	30640	5556	42318	125830	113323	42272	29564	44910	55576
62_creatine Results	41855	41970	42388	35418	34924	35835	33650	38196	33813	49948	44341	49940	43697	44230	41845	27881	30154	33313	42115	46424	45448	41011	46676	43938
622_progesterone Results	16043	18347	14575	25857	16929	17099	12271	48811	8236	14895	18362	12847	56620	12596	28921	8218	15587	14263	16870	11023	12426	25341	13148	11749
624_farnesyl diphosphate Results	32091	59044	39671	131722	178504	113574	73153	162338	166324	31060	52088	38695	103820	108992	109253	84462	39020	74024	142103	130216	143345	107390	93578	123423
63_pyridoxine Results	24743543	23070917	23657892	17558466	18229786	17279818	17088895	18369838	17386708	21203286	20972384	20264770	23799001	21496013	21674200	23121666	21470627	22893703	17337365	16953072	18250203	17748806	17257215	18532988
64_citrulline Results	39955	33792	2471	48623	46506	51334	53932	48093	50148	36042	34177	36284	170398	390521	396963	42926	28634	38422	38992	37229	39483	2362	39729	41961
641_linoleate Results	572019	901579	1457829	1151269	977378	955666	1282627	842935	1828740	1026283	1075099	688191	802968	773851	752916	1696093	918943	681290	812269	871702	723821	526763	1106553	963775
65_L-kynurenine Results	74682	42426	43727	111256	74097	59342	4562	2511	3056	59481	15146	41726	90774	75183	57443	50261	32049	42489	67213	55285	59412	2987	60847	2626
686_cholesterol 3-sulfate Results	2080	1205	185	310727	21192	20371	250516	19254	245066	183	3904	4016	266	4788	7476	554	3334	2182	36456	34364	2294	37902	4320	33531
7_L-lysine Results	81555	78094	29211	26292	30828	25596	26272	23654	26703	64748	67281	62313	53718	55003	55395	63377	47852	66044	36552	38870	42998	3970	41834	37398
716_phenylpyruvic acid Results	4396	332	505	13012	9447	7015	8272	9091	4592	2607	5771	4450	8573	8114	6127	12241	31986	16678	157751	147053	4887	7939	5013	6158
719_vitamin D3 -calciol Results	9447	15229	12635	16737	22531	17276	17477	5611	18961	1204	898	1643	1522	3665	13932	21456	14362	18661	23310	3042	1194	25158	22398	2714
72_urate Results	83	36	56	249652	174428	205978	264734	196583	142206	257676	267699	116251	49493	54394	8294	210689	138230	114062	415786	328291	327953	393097	265294	330393
758_Glycyldeoxycholic acid Results	210180	213916	227182	177227	139864	102967	115380	117664	142016	231686	171931	164953	157676	142489	136217	130154	186092	219481	114846	148689	170493	166181	140074	146366
76_xanthine Results	606599	571445	533056	1196457	1156525	1016696	1093537	1085413	1193764	211910	199241	203302	555561	545936	549434	221631	217547	207420	54001	52615	60331	78757	75076	60638
78_guanosine Results	405846	42562	4533	492981	508789	362740	558899	422792	456488	80951	232129	58872	108420	82918	83257	69097	63622	105015	248429	171362	187683	153382	194788	201289
8_L-aspartate Results	2899	10612	8455	24881	27983	24034	26848	26218	27548	5624	26868	28315	25108	21242	20620	26784	22665	19719	13531	14225	13024	12609	1159	15421
81_L-aspartate Results	2899	10612	8455	24881	27983	24034	26848	26218	27548	5624	26868	28315	25108	21242	20620	26784	22665	19719	13531	14225	13024	12609	1159	15421
9_L-glutamine Results	2466889	2048508	2530844	870409	859355	902942	775366	817368	807962	1850564	1988656	2105028	1719329	1725496	1593089	2148357	2139294	2084269	1145555	1174859	1252603	1140930	1241216	1273389
92_L-cystine Results	100972	75343	390269	151172	324236	711269	473131	2452236	4102012	132650	61386	109427	1115562	632863	545896	125933	398069	111033	286332	159361	99019	825585	286074	530897
94_malate Results	12487	11756	8888	86274	81691	84369	82133	76132	72331	17588	15535	12767	14402	15450	12796	17940	16836	16818	57159	55745	62051	55826	55480	61213
RP_Pos_10_L-serine	11952	12270	22319	3312	5584	6048	211	1230	929	4298	8660	8031	10249	17413	5544	6255	6011	17217	11094	2523	930	10735	6999	10629
RP_Pos_101_guanidinoacetate	23454	31890	43424	49352	60136	73112	65155	123150	75814	19286	12740	16768	23216	36688	10881	14314	20395	21843	30920	19368	22268	58968	31133	34446
RP_Pos_105_(2R)-glyceraldehyde 3-phosphate	52979	58745	51449	59484	47947	45078	51946	45537	45470	73796	62836	59444	76770	65078	66162	68160	63724	59529	70659	57645	58352	63521	59025	48346
RP_Pos_107_betaine	475174	431681	526469	1283617	1071246	828226	1032311	1583003	1302619	297591	230271	272933	631190	516154	735779	189054	320156	310568	450515	333918	602686	369255	371880	468352
RP_Pos_109_creatinine	3750502	3884236	3502845	4860789	4591312	4862352	5146009	4613769	4921198	3802975	3161715	3465117	3357793	3172592	3116386	4072428	3532588	4119464	3794766	3615579	3763735	3504464	3904685	3996504
RP_Pos_110_sorbitol	95900	84984	89724	73795	66510	27934	63068	63303	63670	91507	96188	99031	86215	89104	87069	92470	85583	96897	33314	72317	73736	71335	81478	73365
RP_Pos_112_4-pyridoxate	2953431	2705413	2474042	10878661	10427370	10677009	11014997	10310082	10691314	2201569	1822465	1948863	2531392	2402758	2477877	2022630	1735219	1813821	8300811	7521010	7718611	8144103	7848079	7738133
RP_Pos_113_deoxycytidine	396965	239838	228636	235386	135643	130859	166022	124551	134480	2178407	1919880	2397944	254238	208255	211926	2315423	1477398	2004717	992972	852560	971199	833519	1088832	1100274
RP_Pos_118_4-hydroxy-L-proline	71526213	61781957	47516731	45799300	52282544	38507599	43704109	47292421	26152877	37083763	48381463	50828400	78156776	98615450	61673967	75595946	95659328	69032038	65234211	57606887	55785488	53582943	93117493	61079328
RP_Pos_12_L-methionine	13876514	16865551	18479396	9954020	11064936	11126554	11242639	11420246	10679042	16103444	7637322	14612615	15321519	13952266	13697351	17394497	7209774	15820128	12428148	9775363	12192769	9694264	12203408	11369585
RP_Pos_120_N,N-dimethyl-glycine	1040433	1125599	878429	65237	82578	71621	62738	89014	70746	775350	496256	708010	742659	745768	643183	727217	1000080	953700	628370	553227	647913	528653	678728	723564
RP_Pos_123_1-methyl-L-histidine	140638	133021	107038	45801	50120	57815	54707	58922	46733	90731	98092	105120	43824	45075	19959	75753	85636	72474	48663	45009	47528	43114	51309	41712
RP_Pos_126_D-ornithine	230802	171000	179008	55424	52344	51738	57306	47296	51098	164143	80905	166511	99662	91136	77026	314593	197493	313851	102059	90573	99074	93524	117454	118190
RP_Pos_13_L-tryptophan	213367221	191231157	188919718	151544576	143515263	139160299	139645581	136006534	136187720	214076520	195047648	206666547	189241789	180664051	181527035	201985297	185738587	192118397	169856974	163966186	163192963	160589831	164121037	162812624
RP_Pos_133_xanthosine	358616	307892	20725	617107	616262	605891	587296	603067	600688	379123	313891	378588	312525	307116	305703	352171	314688	372999	453645	427917	429894	450009	146746	477025
RP_Pos_138_glyceraldehyde	7741	15158	15558	33456	29852	35651	22636	15627	16698	94979	56993	110457	29195	19861	25656	143135	82754	115783	79315	85951	79351	51810	73565	66976
RP_Pos_14_L-phenylalanine	294005953	262829674	268394606	215304360	211359926	202613432	211166875	201221742	201259931	280529643	271595477	267592830	257255172	248551953	245670142	273172390	260895931	261450639	243989781	234821831	236304927	235302195	240474317	236112729
RP_Pos_140_5-oxo-l-proline	62428813	57913856	58648525	70448888	70092376	25493355	74291641	32055510	71444278	59062230	50421404	52161081	75052634	72739421	66687413	57908182	51767910	47187652	66101402	59760448	62673563	66889766	66051698	65503510
RP_Pos_144_1-methyladenosine	397369	341153	321163	2257526	2172505	2094694	16871161	16078806	16251910	1215012	744444	1108993	678630	618921	607027	1193032	840962	1110294	2138957	1839669	2115644	1360024	1693225	1719541
RP_Pos_15_L-tyrosine	24904435	33919879	27817064	57374915	56986409	75997978	63989015	56469271	56577860	41426981	28423455	39879408	55274375	29501269	26207754	43959696	32722083	57400959	67745952	57128568	64559154	51140605	72774566	63397252
RP_Pos_155_pyridine-2,3-dicarboxylate	77767	109600	3697	31282	34751	25923	18640	37560	28566	8193	9032	9661	21299	15282	17221	17439	11882	20517	22203	15678	21750	15829	20821	19616
RP_Pos_16_sucrose	209232	193817	181374	207895	169308	166651	180802	131053	176238	176058	204440	183474	151171	158884	91147	197553	108172	156888	189919	137981	140667	145276	140242	115045
RP_Pos_17_D-fructose	43048	40390	38699	37078	32072	30987	45794	31972	35487	38400	40343	44561	36001	48750	37516	39132	44202	38096	35417	37031	38496	35455	44259	38547
RP_Pos_177_L-leucine	113280338	123703148	114536721	69017394	71805914	66553729	66007652	64911396	63036016	123100598	120000865	115745372	118844349	112476274	114401798	112556899	116387658	119571036	96605996	91154560	95035004	67887104	97431095	108067872
RP_Pos_18_L-cysteine	443363	375475	389980	311052	297553	288490	312728	299405	294232	443347	318517	411550	375160	345129	341506	426313	381406	402139	338053	345453	350599	323885	313791	357175
RP_Pos_188_L-lysine	3586453	2183801	2229343	1410550	1340110	1276297	1627986	1514652	1310053	2505814	1617891	2447764	468438	2224062	433551	2289429	1433411	2405664	1609152	1318302	1495201	1331207	1588327	1470733
RP_Pos_189_L-arginine	3445787	3713816	3046626	293362	1625479	487353	1725689	1750711	944980	2942742	3785279	2720994	442599	2291237	1948398	1334234	2050052	1205921	1055002	1674927	1961252	1791387	2210417	1691742
RP_Pos_190_L-histidine	1544632	28458	849918	18658	118342	189226	215158	19685	14517	47111	75079	49963	1502423	46172	52800	380560	1323874	345762	267327	215436	25153	1528238	27186	28298
RP_Pos_192_DL-isocitric acid	11027	9649	10602	82276	68371	56455	74654	62457	64008	8580	6689	7278	15703	10595	11664	11460	14424	16049	32177	33866	15838	36665	34540	15078
RP_Pos_194_5-methylcytosine	6799	4100	5913	19454	22667	19418	18556	19602	17331	6359	6692	5264	9990	10033	8241	7190	6659	6590	17149	16535	17880	15202	14531	17468
RP_Pos_195_L---carnitine	513751	471828	515475	539173	391892	648347	659630	707982	749652	504465	416556	420161	322151	242285	251272	292432	355953	375144	332060	293433	236644	329101	347330	305567
RP_Pos_196_spermidine	2856	3664	424	59711	56324	55528	56137	53030	57104	4251	2110	3486	10152	7631	14811	2970	3449	2178	4951	8277	6539	17365	17190	19272
RP_Pos_20_tetrahydrofolate	1760	18036	22871	7525	5078	6130	70914	53620	62577	20141	15341	24259	6311	8332	24532	8793	11925	9562	7454	9047	13287	48873	4394	60030
RP_Pos_204_pyridoxamine	315970	198142	199288	58170	52827	2915	31160	62297	63562	100865	204625	105709	117994	114404	85216	159204	135505	126145	79496	60985	70037	42739	58160	70367
RP_Pos_214_uridine 5-diphospho-N-acetylglucosamine	57027	46495	40139	25821	1219	1715	14423	16587	1103	39861	2120	50607	3170	2600	25307	2153	2069	46974	35082	1870	25676	1934	18765	37073
RP_Pos_22_uracil	24786	18113	22741	74255	64804	67296	69150	66017	64726	30540	24031	24864	49706	44782	45821	21962	19542	25057	48848	43237	48731	47594	48604	54486
RP_Pos_23_glycerol	3998	26336	15840	38211	41885	38086	3802	105628	35622	12108	4565	44809	7363	26111	4266	17601	930	32008	4417	5062	5219	5467	3684	2454
RP_Pos_230_phosphocreatine	541	591	551	2651	750	12968	17758	13883	15339	2603	2256	1895	2132	3038	2427	727	4832	528	2618	2929	11296	1980	2560	2705
RP_Pos_235_adenosine-5-diphosphoglucose	77083	49185	49112	145574	83540	117333	139968	113129	100892	117086	99093	39465	123369	156171	47364	136202	101824	137262	114233	119433	104206	108172	128366	66879
RP_Pos_239_2-deoxyguanosine 5-monophosphate	47356	34621	26407	24738	21115	16054	22946	12404	17449	29830	43597	17745	33327	31565	23913	29094	36510	16520	24265	23532	15924	25923	20471	16856
RP_Pos_24_D-galactose	175752	143229	151490	129035	109017	131945	110919	95053	92918	54622	127596	186190	66763	131310	90810	160630	106660	100727	136786	11530	138300	169964	18314	112905
RP_Pos_258_dihydroxyacetone phosphate	48068	51248	44686	53153	43493	40359	46073	39869	40751	64931	56080	52278	71386	58442	57763	61122	57637	52012	59671	55774	51097	57337	51685	44046
RP_Pos_264_L-pipecolic acid	74043349	61482205	26299773	21073777	19413954	53597473	65058173	63184464	59878200	75459933	64148548	74972423	25174598	64490172	33257291	68673791	69412052	77829180	67681568	21871713	29504709	61945403	63670095	37525336
RP_Pos_27_n-acetyl-d-glucosamine	89087	87278	128958	72772	117348	93574	103643	99608	145523	137345	144553	68634	62562	71768	66053	51396	45778	87967	70024	86675	71633	74370	66903	58746
RP_Pos_272_N-acetyl-L-asparagine	113281	110283	108496	67339	66895	70493	69923	64280	54087	110913	119432	91671	82970	74893	66015	61168	62448	46080	81805	66155	79541	62983	67656	77310
RP_Pos_275_a-N-acetyl-L-lysine	128732	55467	141370	123115	12277	123941	16711	103445	14975	71887	6487	80609	77250	91353	76312	98174	120056	84424	107697	11268	8145	92856	6251	102405
RP_Pos_277_S-5-adenosyl-L-homocysteine	1240	811	1060	515694	521290	508773	468824	467581	451457	61518	33124	56583	52425	51627	42282	55790	24925	56246	190735	135466	185451	88528	147491	156657
RP_Pos_28_adenine	85276	151631	143114	162569	154630	239287	512067	493498	536335	228508	230116	204667	82671	166828	150452	91228	108845	88211	141040	152962	135618	81778	74240	59643
RP_Pos_285_L-ornithine	230802	171000	179008	55424	52344	51738	57306	47296	51098	164143	80905	166511	99662	91136	77026	314593	197493	313851	102059	90573	99074	93524	117454	118190
RP_Pos_286_adenosine 5-monophosphate	47356	34621	26407	24738	21115	16054	22946	12404	17449	29830	43597	17745	33327	31565	23913	29094	36510	16520	24265	23532	15924	25923	20471	16856
RP_Pos_288_D-cellobiose	14219	14354	9442	25184	27662	30642	33986	29498	34438	13081	11270	10793	13159	10943	8414	8965	9529	12948	24838	17586	17914	33064	19785	23652
RP_Pos_29_L-proline	1661113	1521283	1556113	5538539	5609808	6008633	6122972	5836674	5731249	3544942	2827616	3149305	2527631	2328201	2197709	3149618	3099176	3219307	5693829	5457711	6183710	5943689	5771559	6152226
RP_Pos_3_L-glutamic acid	60944	70630	72054	90582	98019	107272	85680	105193	105811	59677	66142	76486	130996	140603	128926	73417	89261	71554	67444	88366	91827	94562	76821	64605
RP_Pos_301_L-histidine	42068	458775	1012272	178593	31216	83543	143041	136258	139677	43538	54276	40261	157916	37754	47059	36177	599945	37380	185557	12515	179224	23092	89212	154390
RP_Pos_304_guanosine 5-monophosphate	24241	23791	27376	30915	19726	26417	34078	23437	25480	800	2973	11797	2428	259	20775	17514	6587	818	31919	19691	25126	1241	29054	1152
RP_Pos_31_L-asparagine	15194	24342	13059	12671	15297	14422	16527	11887	16589	12639	16482	14128	16492	5202	11360	9065	8663	10895	18088	15681	38039	11076	19700	15401
RP_Pos_312_glyoxylic acid	15708	4800	13988	56613	19081	21843	9304	11584	20143	58512	41997	49395	33226	12711	24606	57916	4745	51836	17105	25190	14203	43714	18281	58773
RP_Pos_32_nicotinamide	42872547	41649554	42745510	37653434	40835726	36715076	38228489	42730175	35657363	43192620	40949988	43673890	39361313	39376865	37169719	42417594	38792876	42423411	42420923	38796859	41576284	38255623	41203257	39937502
RP_Pos_33_citrate	11027	9649	10602	82276	68371	56455	74654	62457	64008	8580	6689	7278	15703	10595	11664	11460	14424	16049	32177	33866	15838	36665	34540	15078
RP_Pos_332_4-aminobutanoic acid	7328126	6220891	5504942	451215	440781	457082	451868	425366	446068	4245362	4858267	4446385	4605881	5697165	4205728	3307488	4644727	5983152	3755430	3414844	3287588	3672141	3752377	2706393
RP_Pos_343_O-acetyl-L-carnitine	2402154	1710012	2016704	9437611	9708232	9290513	8383713	9489648	7873863	1964304	1717521	1828766	5181118	4939379	4161522	2591193	2176573	2420076	4172426	3257619	4575114	3606501	4429284	4512204
RP_Pos_345_inosine 5-monophosphate	1055	11993	7065	1171	614	315	1962	1248	665	47874	118720	56157	5270	19605	49321	4550	72158	3938	2781	3365	5421	1923	2767	1570
RP_Pos_348_acetylcholine	26234	23559	23281	13098	16981	17456	15650	14795	17547	22598	16355	13791	19045	20948	20363	23022	20174	25667	28536	23991	23907	19468	29623	16975
RP_Pos_354_adenosine	88940	81687	120151	1031934	1164539	1025707	2478388	2355262	2521609	1113144	585608	1171819	792931	782799	777311	1652982	888824	1578617	4515867	3376529	4885100	681307	963604	957675
RP_Pos_36_5-methylthio-adenosine	141966	121890	119137	1785311	1768864	1764025	8204731	7858475	8025002	1445885	1906124	1330770	1560693	1401582	1340923	1680948	1949067	1526856	1192459	1368074	1221677	1086596	1021352	1023568
RP_Pos_37_thymine	235509	209892	202581	237672	231818	226852	224919	215151	213384	3411136	1897394	3155417	601786	540291	529245	2363553	1493181	2336210	2217533	1648385	2189678	1881629	2516774	2489504
RP_Pos_374_5-deoxyadenosine	10979	12078	624	1603	1759	1747	1620	2766	1665	58172	13127	58492	707	705	601	3641	942	4324	24482	12179	26049	700	2172	2518
RP_Pos_376_histamine	1276	3073	553	7138	7949	15565	12113	895	9843	13998	16200	14822	25578	13268	5340	3932	1719	11413	20700	22786	31129	52001	79744	82633
RP_Pos_385_cytidine	710551	681109	560109	596879	530936	541196	563019	480986	509643	2230774	1737029	1976642	929888	820039	739927	1363873	1351349	1229610	1552386	1326053	1423946	1596608	1758658	1670604
RP_Pos_39_L-valine	5065483	8913897	7681819	3163359	3107799	2925898	2890020	3387957	4587913	6162432	4670359	4314709	4809197	6228409	4068535	4601046	6258897	6240290	3988635	5310740	5630212	5210676	3340362	5734452
RP_Pos_395_sn-glycerol 3-phosphate	16212	2451	21173	18241	3138	20935	20067	23904	18545	6629	8456	12853	24371	20860	4364	13946	14388	8158	3318	13600	6260	15776	13938	6757
RP_Pos_397_glycerol 3-phosphocholine	72158	89247	92494	263236	35718	39340	37293	43330	39572	77398	76910	75768	22913	63363	20888	64161	15340	11209	24841	158950	19024	17599	25749	188466
RP_Pos_406_R,S-2-hydroxybutyric acid	24063	40127	33069	15637	37667	15230	72082	44081	17866	4478	46922	9754	6951	29528	35990	45151	38340	29525	25121	1856	15713	37010	13966	44096
RP_Pos_409_adenosine 5-diphosphate	14198	9455	7671	18695	16659	12995	16710	12253	12330	22110	21355	17046	25630	9261	16349	23508	18542	18920	16706	17307	15118	17663	15736	7113
RP_Pos_41_L-threonine	41280	34829	43760	37815	26431	2958	40641	28382	42132	27751	31963	31206	27790	36289	33321	24674	34877	35218	44025	33260	41820	31998	32217	40961
RP_Pos_418_N-acetyl-DL-serine	76569682	76042846	72386451	77987439	77321774	79023513	72138540	86500866	71456518	72166020	68114472	69259475	64755516	65685479	57794872	71764363	66616276	68478924	69062538	67278024	69929534	63345321	66729954	65853705
RP_Pos_428_N-trimethylamine	233356	475909	273975	362231	341223	288143	367149	323849	313578	230358	215561	282484	308916	391809	260464	459904	292618	344239	281036	287319	343592	251440	361874	96300
RP_Pos_43_sarcosine	228569	199491	198211	193745	201162	209604	200719	194016	206550	226602	167495	208744	186849	220298	189281	165814	137303	152034	214918	196984	216515	208376	206879	201151
RP_Pos_462_2,3-dihydroxybenzoate	21353	12490	13595	15538	12549	21442	17008	15524	20257	17073	20200	18032	13457	12177	13910	15590	18802	19320	14349	15899	12209	13402	15920	12060
RP_Pos_47_guanine	57787	46810	30599	35389	19599	15778	21004	17682	14435	50115	45238	47530	27624	19451	32594	40298	38154	44942	18289	26290	29991	15237	11948	20717
RP_Pos_492_kynurenic acid	10863794	9705853	9160781	10522606	10147171	9849424	10437481	9089932	9079506	10516780	10180527	9542553	9847893	9271960	8851175	10237921	9473224	9587515	9848616	10057448	9961903	9500418	9665406	9966786
RP_Pos_499_xanthurenic acid	561771	494818	508448	388617	378530	379951	368070	321876	353002	562445	509446	551320	505527	475639	389262	520968	495180	501653	447860	435089	441839	417328	435662	427541
RP_Pos_5_L-alanine	507848	527967	538593	463495	448752	416415	463560	430385	421546	544876	457573	510833	525667	519184	463647	364965	336159	351197	477768	449029	423576	524718	516156	451236
RP_Pos_50_nicotinate	717824	681710	774623	328060	659696	581133	609445	703656	615780	707211	609702	1411907	671746	622973	560536	758239	555615	730375	734953	617792	670151	631821	628714	701141
RP_Pos_54_hypoxanthine	279253	242744	232616	153860	252959	277065	111208	241351	247166	44571	40078	40597	125080	110415	139001	74751	51163	111640	117955	92971	116904	39004	49697	38285
RP_Pos_55_L-homoserine	29278	39625	40761	35842	34077	29875	26076	36597	22139	20360	27333	25192	40447	33862	14554	13025	38368	13576	34415	29140	27084	39756	33480	25546
RP_Pos_56_D-glucose	84401	136097	121449	100055	86009	83078	112578	80926	92621	133346	106305	106368	94631	101139	84979	151617	94949	123627	108409	99563	133486	126109	84698	56275
RP_Pos_577_anthranilate	40148	30445	4938	83713	82154	83816	80633	86196	83361	22385	24580	20242	52532	56409	56704	22476	20367	23046	49135	41851	52740	54634	55955	50563
RP_Pos_578_serotonin	1167	147	159	84809	59271	64968	94517	72298	62442	280234	223054	148032	154030	155321	80500	285942	196349	210568	34149	30049	28751	36266	29886	37049
RP_Pos_607_acetoacetic acid	819	975	10152	20134	19570	28396	25699	38328	5290	1607	5839	1509	8772	9530	1550		6371	183	9756	4760	7909	6274	310	15699
RP_Pos_61_uridine	4300	3622	3739	24180	24779	20902	21351	17706	18695	41946	26935	30393	5603	5107	4646	31716	18809	26402	27221	22899	24594	27935	33696	31689
RP_Pos_618_cholesterol	3294	8198	14129	9456	5918	5932	139343	105014	127052	26783	20969	25678	7451	6069	18049	12265	12470	7020	9829	11448	12175	93839	99165	112024
RP_Pos_62_creatine	5031563	4857776	4944191	4094796	2282374	2572076	2718999	4061327	4005768	4355495	4653155	4857989	4909734	4553795	4070637	2591247	3239185	3219231	3316838	3709299	4043323	4352080	4516633	4158126
RP_Pos_625_indole	538336	434302	615261	980133	843241	1013374	888664	1325695	919192	241139	484119	357788	683632	429128	527125	166070	216628	395412	587202	298619	418217	482569	426170	195622
RP_Pos_63_pyridoxine	83449749	85214288	89384920	84932974	84402668	90272126	82754062	99299327	79536991	79334890	74099890	75927744	73575820	76905772	66307066	79512747	77745355	78433053	79584435	76012032	78741824	73623524	74557828	74866006
RP_Pos_630_cholic acid	8504	9413	16001	85893	5337	6877	5463	75342	6572	87997	5073	65853	78375	70162	80163	73237	6758	78149	5123	5416	4751	85435	97190	6220
RP_Pos_639_stearate	4462	6090	16509	19694	23214	4078	8024	51793	12329	163068	190911	202612	320697	242212	52369	199677	23204	279955	176968	32508	236998	33828	298996	23210
RP_Pos_64_citrulline	6751	20415	12617	6442	3348	12818	6721	5206	7349	4308	6259	5777	118698	76800	80798	11222	11415	6629	5064	5276	4590	4562	5281	5023
RP_Pos_65_L-kynurenine	814533	781804	777557	746310	726036	693838	566911	531266	545605	782683	578865	741548	655467	634779	623317	800384	563448	795024	783744	688724	799909	578781	639226	620419
RP_Pos_67_(S)-Dihydroorotate	29657	31204	28220	29590	25674	24841	26082	25934	29194	30509	30719	36119	26598	25907	29603	33838	29704	32375	29688	30840	27166	24073	26588	29907
RP_Pos_7_L-lysine	3586453	2183801	2229343	1410550	1340110	1276297	1627986	1514652	1310053	2505814	1617891	2447764	468438	2224062	433551	2289429	1433411	2405664	1609152	1318302	1495201	1331207	1588327	1470733
RP_Pos_719_vitamin D3 calciol	11511	5361	80523	13883	24477	19703	16908	7935	5669	7387	22594	42549	14789	18885	15998	4589	15087	18673	11683	8179	18656	12602	28460	51195
RP_Pos_72_urate	10999	5904	1840	479145	502542	454154	476616	558840	457356	378534	312241	266157	147088	151423	92419	310857	241046	289360	528351	461381	473363	558130	464871	526109
RP_Pos_74_cytosine	321849	358763	352119	423952	458242	458306	442717	569154	459281	3976039	3107455	4083819	265119	264514	247288	2888886	2461316	2920090	1790973	1676285	1730850	1937888	2145057	2308377
RP_Pos_758_Glycyldeoxycholic acid	41171	105339	101310	86934	73113	83087	41613	28743	37944	112374	112024	115949	99034	89299	95437	89536	100172	99839	84723	89903	101726	46191	43179	56040
RP_Pos_76_xanthine	41004	54613	8997	693498	669245	634335	704584	670954	639057	54731	75420	57698	86947	83082	79266	73687	75519	58083	128313	318798	323722	298148	69370	421517
RP_Pos_765_2-aminobutanoic acid	704012	610282	701858	44182	38035	46341	42059	48801	36989	401739	615471	254306	303422	596209	395787	682049	580559	407658	401400	342005	357639	419151	424252	408280
RP_Pos_78_guanosine	4405	4330	4131	159585	153094	152514	111122	148511	154388	65617	42425	60315	38107	36491	35728	101144	72516	101268	62558	47530	55899	28138	32117	30740
RP_Pos_82_L-isoleucine	68062659	59267931	83916070	61254951	63021982	59666340	58758152	51902333	56169763	74704241	121425752	53522351	105155107	100458660	81344176	77225575	86028835	97711149	76760851	75487955	85350917	72875476	95944422	81719626
RP_Pos_869_sedoheptulose 7-phosphate	13349	11554	1054	71797	72877	71245	6096	53877	63921	9989	11525	11577	77846	81662	79169	11416	14160	14376	47862	47312	67589	60486	55870	67723
RP_Pos_88_purine	9114	2163	13745	32573	50369	47771	37360	10907	14143	8745	10028	11507	1713	13491	20568	48880	23110	16783	31276	42111	41821	22603	59317	53632
RP_Pos_9_L-glutamine	897100	1007285	1050204	66997	51578	92459	57161	143680	164452	624085	777515	677461	488158	466534	389861	734315	839382	517553	328443	242074	213794	275980	87770	48093
RP_Pos_95_folic acid	45338887	39661767	39727022	36638539	35581906	34173479	33442207	33482040	33711425	42947434	40040937	40997498	37317101	35306910	35457515	41287301	39993411	39754749	38519492	37567984	37265536	37135633	36517075	37394715
RP_Pos_97_D-tryptophan	213367221	191231157	188919718	151544576	143515263	139160299	139645581	136006534	136187720	214076520	195047648	206666547	189241789	180664051	181527035	201985297	185738587	192118397	169856974	163966186	163192963	160589831	164121037	162812624
RP_Pos_98_deoxyuridine	39399	33706	31522	52510	52117	46296	49683	45323	44435	170550	98354	147820	41608	37615	32374	185547	117929	160264	128131	106571	117815	89316	106876	103941

## Sheet: iKras CM (SFig.5A)
	iKras Off 1	iKras Off 2	iKras Off 3	iKras On 1	iKras On 2	iKras On 3
2-2-Dimethyl Succinic acid	2.86552e+06	2.89376e+06	2.81819e+06	4.40856e+06	4.15147e+06	4.35286e+06
2-3-Pyridinedicarboxylic acid	33224.6	33173.3	34930.7	31085.1	36828.2	39047.5
2-Deoxycytidine	1810983	1970704	1765191	1104834	1084302	1190555
2-Deoxycytidine	14790.6	16405.1	15017.2	15669.7	13899.7	15648.9
2-Deoxy-D-ribose	6244.77	6785.07	5571.32	11060.6	11214.5	11280
2-Deoxyuridine	35382	44457	46341	34979	39324	44430
2-Deoxyuridine	7932.44	8590.4	7972.18	9482.41	9033.46	8969.87
2-Isopropylmalic acid	201579	185013	220441	99136.8	99143.8	117631
2-Ketobutyrate	1489.07	2066.8	2602.31	1714.08	1324.9	1342.4
2-Methyl-1-butanol	1.22298e+06	1.21075e+06	1.27492e+06	900123	884971	908967
2-Phosphoglyceric acid	9025.13	7797.35	9065.17	8932.39	8450.56	8669.23
2-Pyrrolidone-5-Carboxylic Acid	16934730	18096978	16312104	27596637	28238683	14625123
3-Indoleacetic acid	2891.32	3253.59	2735.06	7754.11	7220.42	7777.65
3-Methylglutaric acid	2.86552e+06	2.89376e+06	2.81819e+06	4.40856e+06	4.15147e+06	4.35286e+06
4-Hydroxybenzoic acid	5192.37	5599.17	5630.34	3514.98	3776.45	3310.49
4-Hydroxyphenyl-pyruvic acid	8774.95	6786.15	4755.84	14158.8	15055.2	14848.5
4-Methyl-2-oxovaleric acid	55231.9	52892.6	60267	58166.8	56852	55060.2
4-Pyridoxic acid	23661.5	24151.8	26053	45955.2	46855.3	44713.3
5-Adenosyl-Homocysteine	13913	16087	14898	18110	17055	18337
5-Hydroxy-3-indoleacetic acid	77.1587	246.213	88.1045	223.387	287.635	214.516
Acetyl-L-Carnitine	455241	389806	585496	1894783	2114058	2038455
Adipic acid	2.86552e+06	2.89376e+06	2.81819e+06	4.40856e+06	4.15147e+06	4.35286e+06
Allantoin	6319.32	7170.71	7642.02	10450.2	11024	9992.03
alpha-D(+)Mannose 1-phosphate	9512.93	10585.1	13210.4	4112.28	4968.66	4377.93
alpha-D-Glucose-1-phosphate	10053.4	10819.2	12226.9	4059.26	4453.46	4389.37
alpha-Ketoglutaric acid	2.78933e+06	2.7916e+06	2.74536e+06	4.31633e+06	4.07686e+06	4.24937e+06
Arg	2911222	2958245	3155031	1852674	2031296	1855322
Arginine	4241700	4301330	4626694	2333230	2490816	2341084
Asn	98186	101253	98744	53385	55045	55351
Aspartic Acid	11773	12459	10464	18076	14051	14723
Cellobiose	3632.38	3855.59	4209.94	4412.21	3440.17	4170.1
cis-Aconitic acid	3.23221e+06	3.4821e+06	3.6444e+06	3.1879e+06	3.41094e+06	3.27724e+06
Citramalic acid	87498.8	86759.9	106877	88526.4	87290.4	54776.4
Citric acid	9.4135e+06	9.14608e+06	6.0443e+06	1.46161e+07	8.90052e+06	1.26272e+07
Creatiinine	8788	10427	10861	16701	15581	19561
Creatine	725481	771973	837371	714124	800056	687509
Creatine	3568.73	3454.36	4183.4	4777.28	5486.23	4795.93
Creatinine	96475	104301	109195	160267	159135	167159
Cytidine	2227027	2521339	2241493	678587	775035	637055
Cytidine	5752.51	7121.04	6498.58	2496.93	2405.9	2068.53
Cytosine	561881	693850	609565	190085	219007	180049
D-Fructose 6-phosphate	10187.8	10585.7	12348.1	3359.8	4866.89	4293.05
D-Gluconic acid	109632	110459	115017	139662	134215	136847
D-Glucose 6-phosphate	10051.3	11191.5	13247.5	5062.83	5216.44	5018.6
Dihydrofolic Acid	14746	15843	16393	15658	15615	16369
DL-2-Aminoadipic acid	342.148	617.414	707.192	5059.7	901.715	15466.4
DL-Isocitric acid	9.40926e+06	9.02785e+06	6.01798e+06	1.45588e+07	8.9425e+06	1.25768e+07
DL-Phenylalanine	204554769	210217543	222754398	175460837	177749448	176484026
DL-Threonine	600086	601635	621572	486870	511707	492117
DL-Valine	123692027	127774212	131720254	109947670	117507508	105894946
D-Maltose	6675.53	6953.67	7068.68	5772.63	5948.45	5822.59
D-Mannose	1.71119e+06	1.69511e+06	1.69004e+06	1.11452e+06	1.13029e+06	1.13611e+06
D-pantothenic acid	1.39367e+06	1.39987e+06	1.48649e+06	1.54246e+06	1.4607e+06	1.50554e+06
D-Xylose	31716.6	32132.4	30697	31649.8	24940.1	33631.8
Folic Acid	4307535	4487861	4714250	4825512	4612116	4869146
Galactonic acid	109632	110459	115017	139662	134215	136847
Glucosamine	3163	3561	3070	3000	3430	3530
Glutamic Acid	308135	322330	299545	316812	356353	336525
Glutathione	17921	19849	16860	22592	19803	22514
Glyceric acid	38978.4	40183.9	39669	28171.2	28620.4	30501.2
Guanosine	135720	151813	154842	45462	43365	43677
Homocitrate	20839.4	22307.4	25630.7	21051.7	23971	22703.9
Hypoxanthine	49508.1	54947.3	51191	8065.8	10213.8	8085.76
Inosine	110931	108481	116502	13186	44619	15378
Isopentyl acetate	263347	269221	209423	337334	221138	297509
Itaconic acid	63047.8	60874	67519.4	63415.2	62289.7	64050.5
Ketovaleric acid	81674.2	84474.2	81987.4	103084	104704	104909
Lactic acid	1.19297e+06	1.24786e+06	1.10692e+06	1.90136e+06	1.87975e+06	1.88068e+06
L-Arabinose	31716.6	32132.4	30697	31649.8	24940.1	33631.8
L-Arabitol	1915.13	2637.74	3488.84	4012.59	4042.01	4357.13
L-Arginine	7789.96	8758	9372.81	6697.44	5403.89	5425.68
L-Arginosuccinic Acid Lithium	4942	7298	8913	10323	11547	12229
L-Aspartic Acid	27453.1	35935.2	43573.9	47885.8	33861.2	49753.7
L-Glutamic acid	605419	622510	423628	817217	858139	821882
L-Glutamine	1868763	1856585	2004952	799113	936195	777828
L-Glutamine	74382.2	72795.7	84286.1	29736.8	31420.5	31824.7
L-Gluthathione (oxidized)	21156.8	23864.6	18978.3	98915.8	82889.4	92040.2
L-Histidine	356605	374085	379325	236857	260455	238937
L-Histidine	12097.3	11913.1	12420.4	7104.6	6058.94	5980.46
L-Hydroxyglutaric acid	143997	147611	152999	176664	167622	175436
L-Isoleucine	358440859	366102493	360068134	369757777	366132820	368848040
L-Isoleucine	7282.08	7831.07	7599.65	8384.32	9385.05	9851.69
L-Kynurenine	7968.22	8255.04	8508.1	11655.8	10885.6	11390.6
L-Leucine	750704075	742986452	795778581	553588525	565210703	555647801
L-Leucine	7169.64	7905.78	7468.19	8413.03	9381.45	9824.73
L-Malic acid	3.13017e+06	3.30005e+06	3.30203e+06	4.39229e+06	4.0405e+06	4.43891e+06
L-Methionine	334168	323125	339100	306708	318514	301527
L-Phenylalanine	2.56692e+06	2.48823e+06	2.54169e+06	1.82166e+06	1.9025e+06	1.86414e+06
L-Serine	27110.2	27317	27216.4	5112.5	4544.39	5231.96
L-Sorbose	1.73031e+06	1.26452e+06	1.16685e+06	1.08649e+06	1.13717e+06	1.1391e+06
L-Threonine	70672.3	70978.9	72647.8	49904.7	59631.3	54639.6
L-Tryptophan	57129892	58660927	61662347	44385438	45210711	44039616
L-Tryptophan	175287	176862	180436	124075	128984	125190
L-Tyrosine	87625517	90688802	93457806	83601081	85993939	86172740
L-Tyrosine	511483	520305	523584	641160	599220	618867
Maleic acid	12639.8	13620.1	13276.1	13063.4	14679.9	13101.5
Malonic acid	55813.7	56213.8	58117.9	78020.6	71778	79156.7
Melibiose	6667.21	6958.28	7092.74	5772.63	5951.56	6507.78
Methionine	39131773	39935085	42278460	27295545	28809720	27123122
Mevalonic acid	143997	147611	152999	176664	167622	175436
Mevalonic acid 5-phosphate	7790.59	9485.06	8661.47	6170.68	6588.66	6061.39
myo-Inositol	6.85241e+06	7.04677e+06	7.19829e+06	5.95803e+06	5.88978e+06	5.93698e+06
N-Acetyl-alpha-D-glucosamine 1-phosphate	12605.6	13078.9	13799.4	14469.4	13074.2	14826.6
N-acetylaspartate	13682.1	15030.2	15541.1	19440.1	18572	19478.6
N-Acetyl-D-Glucosamine	19483	18711	17528	7497	8295	9320
N-Acetyl-D-glucosamine 6-phosphate	12605.6	13078.9	13799.4	14469.4	13074.2	14826.6
N-Acetylglutamic acid	44757	48073.8	45782.6	36612.2	30686.9	33125.5
N-Acetylneuraminic acid	13288	12734.5	12777.8	13573.2	12610.3	13351.1
N-Carbamoyl-DL-aspartic acid	8423.11	8943.09	9291.94	37132.7	31711.9	37121.2
Nicotinamide	17090708	17385009	18276317	17068123	17441727	17459283
o-Hydroxy hippuric acid	4531.96	4642.87	4578.37	5089.32	5239.6	4749.37
Orotic acid	4194.79	4349.89	4136.61	10890.5	9279.35	10636
Phenylpyruvic acid	89739.1	93660.1	84155.7	101676	91595	103500
Proline	2854348	3096351	3002592	3939630	4422594	4116570
Pyridoxal hydrochloride	47589.1	42633.6	46169.6	57218.3	59128.3	60555.2
Pyridoxine	818725	790282	806472	1.20625e+06	1.18496e+06	1.18929e+06
Pyruvate	13887	13123	13734	10455	11265	10551
Pyruvic acid	1.22298e+06	1.21075e+06	1.27492e+06	900123	884971	908967
Riboflavin	22257.6	20098.6	18403.9	30755.1	26416.7	28711.7
Salicylic acid	5285.54	5634.48	6392.65	5339.38	5765	4866.35
Sarcosine	17031	17446	15753	16738	21635	15896
Serine	31685	30872	31867	14715	17000	15041
Serotonin	754	877	546	11637	13163	11705
Spermine	4980	7312	8814	10052	11105	11904
Succinic acid	5.5227e+06	5.56685e+06	5.71561e+06	5.15491e+06	4.85834e+06	5.01082e+06
Taurocholic acid	3053.18	3008.31	3149.48	3377.87	3180.47	3312.47
Thiamine	573860	471006	475975	6792199	7160341	7060646
Thymidine	558859	457998	462889	6592693	6909721	6774358
Thymine	1794.95	1759.86	1683.4	5875.26	6048.47	6207.15
Trans-4-hydroxy-L-Proline	358440859	366102493	360068134	369757777	366132820	368848040
trans-Aconitic acid	3.23221e+06	3.4821e+06	3.6444e+06	3.1879e+06	3.41094e+06	3.27724e+06
Trehalose	3129.87	2986.02	2556.52	2849.84	2728.35	2744.26
Uracil	55194.3	57743.7	53056	107094	114589	105267
Uric acid	199319	204652	191677	247727	236701	236490
Uridine	70584	74996	71087	30706	35131	29872
Uridine	58004	63674.7	57205.8	35107.7	36070.6	31085.6
Xanthine	468237	478294	455000	485966	466551	489301
Xanthosine	295813	325410	314569	432964	405374	426182
Xanthosine	75504	79888.3	79733.1	96769	95641.3	94387.6
Xylitol	3328.6	3446.58	3485.95	4932.91	5223.09	5034.46
